# Supplementary material for: Exploring key biomarkers of liver fibrosis progression to hepatocellular carcinoma based on immune cell-related genes
Source: Research Square preprint supplement (doi:10.21203/rs.3.rs-6479983/v1), 2025-05-21
Supplement: Supplementary file 1 [file 15ef511b6be2030d8e5e8e07.xlsx]

## Sheet: MCL1.GOgsea
ONTOLOGY	ID	Description	setSize	enrichmentScore	NES	pvalue	p.adjust	qvalue	rank	leading_edge	core_enrichment
CC	GO:0022626	cytosolic ribosome	97	-0.666199	-3.01268	1e-10	1.119e-07	9.71579e-08	5042	tags=72%, list=20%, signal=58%	6208/6206/6156/6234/6160/6157/65008/9636/6152/6147/6230/51121/6193/6175/6189/6144/6167/9045/6173/6169/6231/6165/6217/6129/6155/6170/6143/6139/9349/6142/6210/6188/6207/6204/51065/6233/6137/6132/6227/64963/3921/6194/6168/6235/6171/6125/6136/6154/6130/6222/11224/6205/6232/6224/6203/6187/6159/6192/6166/6124/4736/140032/6218/6223/23521/6209/116832/25873/8705/51538
MF	GO:0003735	structural constituent of ribosome	155	-0.574553	-2.77834	1e-10	1.119e-07	9.71579e-08	5105	tags=57%, list=20%, signal=46%	6133/10573/6208/6206/29074/6156/6234/65005/6160/6157/64965/65008/9636/6152/6147/6230/51116/51121/64979/740/6193/6175/6189/6144/6167/9045/6173/128308/6169/6231/6165/6217/6129/6155/6170/6143/6139/55168/9349/6142/64975/6210/6188/28973/6207/6204/51065/6233/6137/6132/6227/64963/3921/6194/6168/6235/6171/6125/6136/51373/51264/6154/6130/6222/11224/6205/6232/6224/6203/6187/6159/6192/124995/6166/6124/4736/…
CC	GO:0044391	ribosomal subunit	168	-0.555102	-2.70646	1e-10	1.119e-07	9.71579e-08	5105	tags=55%, list=20%, signal=44%	10573/6208/6206/29074/6156/6234/65005/116540/6160/6157/64965/65008/9636/6152/6147/6230/51116/51121/64979/740/6193/6175/6189/6144/6167/9045/6173/128308/64978/6169/6231/6165/6217/6129/6155/64976/6170/6143/6139/55168/9349/6142/64975/6210/6188/28973/6207/6204/51065/6233/6137/6132/6227/64963/3921/6194/6168/6235/6171/6125/6136/51373/51264/6154/6130/6222/11224/6205/6232/6224/6203/6187/6159/6192/124995/6…
CC	GO:0015935	small ribosomal subunit	65	-0.634864	-2.64987	1e-10	1.119e-07	9.71579e-08	5042	tags=60%, list=20%, signal=48%	6208/6206/6234/64965/9636/6230/51116/6193/6189/6231/6217/55168/6210/6188/28973/6207/6204/51065/6233/6227/64963/3921/6194/6235/51373/6222/6205/6232/6224/6203/6187/6192/140032/6218/6223/6209/23107/54460/8705
CC	GO:0022627	cytosolic small ribosomal subunit	40	-0.710502	-2.64898	1e-10	1.119e-07	9.71579e-08	5042	tags=80%, list=20%, signal=64%	6208/6206/6234/9636/6230/6193/6189/6231/6217/6210/6188/6207/6204/51065/6233/6227/64963/3921/6194/6235/6222/6205/6232/6224/6203/6187/6192/140032/6218/6223/6209/8705
CC	GO:0005840	ribosome	194	-0.495404	-2.45499	1e-10	1.119e-07	9.71579e-08	5105	tags=49%, list=20%, signal=40%	10573/6208/6206/29074/6156/6234/65005/116540/6160/6157/64965/65008/9636/6152/6147/6230/92170/51116/51121/64979/740/6193/6175/6189/6144/6167/9045/6173/128308/64978/6169/6231/6165/6217/6129/6155/64976/6170/6143/6139/55168/9349/6142/64975/6210/6188/28973/6207/6204/51065/6233/6137/6132/6227/64963/3921/6194/6168/6235/6171/6125/6136/51373/51264/6154/6130/6222/11224/6205/6232/6224/6203/6187/6159/6192/12…
BP	GO:0046395	carboxylic acid catabolic process	215	0.417714	2.18064	1e-10	1.119e-07	9.71579e-08	7766	tags=56%, list=31%, signal=39%	4552/9673/51/36/493/83752/1579/34/10588/8564/5446/51166/5264/3034/157739/5194/1892/2747/6999/8942/39/594/1666/10841/5053/9663/2110/3033/6342/64577/383/2752/7915/64087/1381/6718/60496/5825/80150/340665/4846/4051/593/549/5444/84706/130013/1962/443/54363/57834/18/4329/8660/84696/55268/10840/10478/2805/2806/11112/84129/6470/4143/89874/23175/58510/10157/2746/197322/10295/3712/2653/23475/875/171586/329…
BP	GO:0016054	organic acid catabolic process	218	0.413562	2.16256	2.15156e-10	2.10665e-07	1.82911e-07	7766	tags=56%, list=31%, signal=39%	4552/9673/51/36/493/83752/1579/34/10588/8564/5446/51166/5264/3034/157739/5194/1892/2747/6999/8942/39/594/1666/10841/5053/9663/2110/3033/6342/64577/383/2752/7915/64087/1381/6718/60496/5825/80150/340665/4846/4051/593/549/5444/84706/130013/1962/443/54363/57834/18/4329/8660/84696/55268/10840/10478/2805/2806/11112/84129/6470/4143/89874/23175/58510/10157/2746/197322/10295/3712/2653/23475/875/171586/329…
CC	GO:0022625	cytosolic large ribosomal subunit	56	-0.644942	-2.61828	2.42075e-10	2.10686e-07	1.82929e-07	4796	tags=68%, list=19%, signal=55%	6156/6160/6157/65008/6152/6147/51121/6175/6144/6167/9045/6173/6169/6165/6129/6155/6170/6143/6139/9349/6142/6137/6132/6168/6171/6125/6136/6154/6130/11224/6159/6166/6124/4736/23521/116832/25873/51538
BP	GO:0042254	ribosome biogenesis	231	0.402892	2.1116	3.69922e-10	2.8976e-07	2.51586e-07	2571	tags=29%, list=10%, signal=27%	9221/9188/23160/10199/83732/9790/23223/1654/55003/56342/51202/23560/6059/64794/51388/8780/23212/84946/57602/23076/65083/25983/92797/51018/8886/84128/6123/54552/29889/5901/387338/55781/57050/1662/55759/55646/705/1736/79039/153443/55027/23404/11056/10171/285855/84135/22894/64434/64216/134430/54865/54984/54663/10813/22868/90441/55272/55636/55661/10200/22803/2752/79954/23246/81875/51010/10557/51154
CC	GO:0015934	large ribosomal subunit	106	-0.507481	-2.32443	1.7894e-09	1.27422e-06	1.10635e-06	4809	tags=50%, list=19%, signal=41%	29074/6156/65005/116540/6160/6157/65008/6152/6147/51121/64979/740/6175/6144/6167/9045/6173/128308/64978/6169/6165/6129/6155/64976/6170/6143/6139/55168/9349/6142/64975/6137/6132/6168/6171/6125/6136/51264/6154/6130/11224/6159/124995/6166/6124/4736/23521/116832/25873/122704/51258/51538/84545
BP	GO:1903311	regulation of mRNA metabolic process	237	0.386242	2.03123	2.80415e-09	1.83041e-06	1.58926e-06	5205	tags=38%, list=21%, signal=30%	80149/64783/7538/5725/6651/10150/9589/10605/6732/1432/7536/3184/170506/4928/1859/1655/201626/27254/6294/60493/246175/1660/10492/23404/23144/10179/678/22894/3183/9444/54915/4691/9588/1617/23034/3182/22916/22868/28960/10250/6093/23210/23369/27327/26135/87178/8570/79882/10656/55677/57055/51010/58517/79048/22849/3192/51574/7356/55234/9261/29896/9704/219988/55795/7812/9567/10642/11051/55796/221662/677…
CC	GO:0030684	preribosome	57	0.602464	2.50122	5.95701e-09	3.58933e-06	3.11646e-06	3344	tags=49%, list=13%, signal=43%	10199/83732/9790/56342/51388/8780/23212/84946/23076/65083/25983/51018/55781/57050/55759/705/153443/134430/54663/10813/90441/55272/79954/23246/51154/28987/51077/55813
BP	GO:0034660	ncRNA metabolic process	408	0.322727	1.81611	9.69893e-09	5.42655e-06	4.71164e-06	3787	tags=28%, list=15%, signal=24%	80149/8178/9221/79753/9188/23160/10199/83732/9790/23223/22936/1654/56342/6774/51202/23560/8780/23212/60487/23405/80324/57602/23076/65083/25983/92797/54517/51018/8886/4234/84128/57510/387338/55781/26512/57050/1662/1655/55759/55646/705/54888/84172/1736/79039/153443/23404/11056/10171/285855/10179/84135/22894/25896/8737/4790/7257/64216/4691/134430/1956/5970/10785/8575/54663/10813/9836/221078/285381/1…
BP	GO:0034470	ncRNA processing	311	0.346326	1.89014	2.74004e-08	1.43085e-05	1.24234e-05	3584	tags=30%, list=14%, signal=26%	80149/9221/79753/9188/23160/10199/83732/9790/23223/1654/56342/6774/51202/23560/8780/23212/60487/23405/80324/57602/23076/65083/25983/92797/54517/51018/8886/4234/84128/387338/55781/26512/57050/1662/1655/55759/55646/705/54888/1736/79039/153443/23404/11056/10171/285855/84135/22894/25896/8737/7257/64216/134430/1956/10785/8575/54663/10813/9836/221078/285381/127253/55272/80746/10978/51605/8846/55636/556…
BP	GO:0022613	ribonucleoprotein complex biogenesis	312	0.342205	1.87037	3.64197e-08	1.78297e-05	1.54808e-05	3787	tags=30%, list=15%, signal=26%	9221/9188/23160/10199/83732/9790/23223/1654/55003/56342/51202/23560/6059/64794/51388/8780/23212/84946/57602/23076/65083/25983/6732/92797/51018/8886/7536/84128/6123/54552/29889/5901/387338/55781/57050/1662/1983/55759/55646/705/1736/79039/153443/1660/55027/23404/11056/23451/10171/8894/285855/84135/22894/64434/64216/134430/55692/54865/54984/54663/8661/10813/22868/90441/25929/55272/55636/55661/10200/…
BP	GO:0009063	cellular amino acid catabolic process	100	0.479643	2.21888	5.74453e-08	2.49983e-05	2.17049e-05	8390	tags=69%, list=33%, signal=46%	4552/9673/36/493/8564/51166/3034/157739/1892/2747/6999/8942/594/10841/5053/64577/383/2752/7915/64087/80150/4846/593/549/84706/130013/443/18/4329/2805/2806/11112/6470/4143/89874/58510/10157/2746/10295/3712/2653/875/6898/23498/55556/8659/3081/144193/275/2184/2731/2109/2954/4842/3155/5860/2572/64902/23576/1757/38/51380/10993/189/27165/23464/2875/2108/51268
CC	GO:0005774	vacuolar membrane	381	-0.333374	-1.79815	5.65666e-08	2.49983e-05	2.17049e-05	6003	tags=37%, list=24%, signal=29%	527/55697/326624/7942/27183/138065/84283/23208/6185/9032/23207/10855/114790/155066/51382/27074/2647/65082/5878/9725/10211/64601/57192/290/8992/8546/8895/114990/10948/528/80208/8898/2782/124997/84557/23646/1175/55823/910/4074/5587/80342/7436/3109/8519/1601/3125/3108/27243/2783/79643/3326/9528/23503/26276/55255/1915/972/10548/20/51284/7098/51552/55737/7805/79901/5547/51092/684/84219/162/11182/163/7…
BP	GO:0006364	rRNA processing	167	0.403405	2.03732	7.61666e-08	3.14007e-05	2.72638e-05	2571	tags=30%, list=10%, signal=27%	9221/9188/23160/10199/83732/9790/23223/56342/51202/23560/8780/23212/57602/23076/65083/25983/92797/51018/8886/84128/387338/55781/57050/1662/55759/55646/705/1736/79039/153443/23404/11056/10171/285855/84135/22894/64216/134430/54663/10813/55272/55636/55661/10200/22803/79954/23246/51010/10557/51154
MF	GO:0030020	extracellular matrix structural constituent conferring tensile strength	38	-0.651672	-2.41276	1.31696e-07	4.91227e-05	4.26511e-05	6038	tags=68%, list=24%, signal=52%	1286/85301/1285/1297/1293/1295/1296/1287/1290/1298/1307/50509/1299/1303/7373/1282/1277/1289/1291/1300/1306/1284/1281/1292/1278/1305
BP	GO:0006520	cellular amino acid metabolic process	232	0.364742	1.91579	1.25954e-07	4.91227e-05	4.26511e-05	4572	tags=34%, list=18%, signal=28%	441024/4552/9673/4507/2618/9945/36/493/2730/10588/8564/468/51166/51582/3034/157739/4953/1892/2747/84105/22929/2729/6999/8942/5471/594/1806/79814/10841/5053/1644/1638/84842/51733/132949/5352/64577/383/2752/7915/389434/64087/7166/60496/26227/29968/92935/80150/4846/593/57176/549/84706/130013/443/18/4329/5805/22928/2805/2806/11112/51078/10056/6470/3172/10165/4143/89874/1373/58510/23463/10157/2746/448…
BP	GO:0002181	cytoplasmic translation	130	-0.440038	-2.07897	2.19179e-07	7.80378e-05	6.77568e-05	5042	tags=53%, list=20%, signal=43%	6208/6206/6156/6234/6160/6157/57409/6152/6147/6230/51121/25946/6193/6175/6189/64506/6144/6167/9045/6173/6169/6231/6165/6217/6129/6155/6170/6143/6139/9349/6142/6210/6188/51389/6207/6204/6233/6137/6132/6227/3921/6194/6168/6235/4733/6171/6125/6136/6154/6130/6222/11224/6205/6232/1974/6224/6203/6187/6159/51611/6124/4736/6218/1819/6223/23521/6209/8664/25873
MF	GO:0005201	extracellular matrix structural constituent	159	-0.413434	-2.0021	2.54817e-07	8.33746e-05	7.23905e-05	5534	tags=53%, list=22%, signal=41%	10418/8292/79812/56955/22798/10516/4239/3915/7045/64856/255743/7784/1286/85301/1285/6975/1297/4240/8406/50939/1293/1295/1296/2202/5549/1287/64129/4148/1290/2813/4586/3909/1298/4256/115908/8425/1307/50509/3918/1299/1303/25890/131368/2201/3914/2006/375790/633/7373/27286/1282/7450/3490/8483/7058/165/4060/1634/1277/2199/1289/80144/3912/6678/1893/25878/3908/1291/1300/1306/1284/3913/78987/3910/11117/12…
CC	GO:0062023	collagen-containing extracellular matrix	400	-0.319568	-1.73191	2.6923e-07	8.33746e-05	7.23905e-05	5559	tags=37%, list=22%, signal=29%	8577/340706/7869/284018/1297/6275/3956/4015/1075/2263/4240/7077/4693/8406/50939/2719/1512/1293/337/1000/5155/83729/1295/23452/1296/2202/5549/1522/4583/1287/1178/64129/4148/1290/333/1476/3909/2152/1298/5949/6278/4256/1012/161198/10319/151887/115908/7482/8425/6387/1307/50509/3918/1299/1303/25890/2201/158326/3914/2006/375790/2162/4054/633/27299/7373/3958/7042/27286/712/1282/7450/11095/3490/5270/5116…
CC	GO:0030055	cell-substrate junction	397	-0.319125	-1.72527	2.59432e-07	8.33746e-05	7.23905e-05	5102	tags=37%, list=20%, signal=30%	7408/3694/10673/2934/23676/1072/54751/567/9351/6133/50507/83692/1000/83706/6208/7171/10211/23092/1495/10092/6156/55679/387/8895/6160/55612/867/5879/5094/5159/6278/4323/1012/10518/3693/22801/6193/51474/9493/1601/6175/6189/2783/9260/9019/10278/2768/6169/10095/3728/23114/6217/10525/6129/9902/171024/2665/6155/5880/91179/7106/824/6143/59341/9349/6188/6207/23385/6204/11078/10487/3927/7739/8321/9181/613…
BP	GO:0050907	detection of chemical stimulus involved in sensory perception	409	0.302086	1.69815	2.76744e-07	8.33746e-05	7.23905e-05	6988	tags=37%, list=28%, signal=27%	343563/390271/81285/80834/283189/26188/403282/283092/390144/8387/8392/144125/26219/125962/390081/390437/79544/119682/150681/343171/219493/283297/390072/26246/81469/219432/403244/390082/283160/50840/132112/50837/390077/765/283159/79324/81448/26683/346517/390059/79501/390436/219438/23538/26531/123041/127074/347169/441669/26737/219874/26648/338675/259292/391109/127069/50834/79290/219473/403277/5304/…
BP	GO:0009593	detection of chemical stimulus	442	0.298399	1.68806	2.91304e-07	8.45105e-05	7.33768e-05	7006	tags=38%, list=28%, signal=28%	801/343563/390271/81285/80834/283189/26188/403282/283092/390144/8387/8392/721/144125/26219/125962/390081/390437/79544/7097/7043/119682/150681/343171/219493/283297/30819/390072/26246/81469/64581/219432/403244/390082/283160/50840/132112/50837/390077/765/7099/283159/79324/64127/81448/26683/346517/390059/79501/6857/390436/219438/23538/26531/123041/127074/347169/441669/26737/219874/26648/338675/259292…
CC	GO:0005581	collagen trimer	80	-0.517969	-2.26938	3.37346e-07	9.43725e-05	8.19396e-05	6038	tags=52%, list=24%, signal=40%	1286/85301/1285/1297/4015/1293/1295/1296/1287/1290/1298/114905/115908/1307/50509/1299/1303/114897/7373/712/6441/1282/114904/4060/78989/1277/10882/1289/4153/390664/713/1291/1300/1306/1284/11117/114902/1281/1292/1278/1305/147372
BP	GO:0016072	rRNA metabolic process	196	0.375493	1.94023	4.00761e-07	0.000108247	9.39861e-05	3863	tags=33%, list=15%, signal=28%	9221/9188/23160/10199/83732/9790/23223/56342/51202/23560/8780/23212/57602/23076/65083/25983/92797/51018/8886/84128/387338/55781/57050/1662/55759/55646/705/84172/1736/79039/153443/23404/11056/10171/285855/84135/22894/64216/4691/134430/54663/10813/55272/55636/55661/10200/22803/79954/9014/23246/51010/10557/51154/25926/28987/9330/51077/55813/2972/57647/92345/54464/10799/64768
MF	GO:0003724	RNA helicase activity	68	0.523398	2.28132	4.74824e-07	0.000123976	0.000107643	4187	tags=46%, list=17%, signal=38%	9188/1654/51202/64794/55308/57696/8886/170506/9879/1662/1655/11269/10146/79039/6832/1660/11056/57062/1665/1973/56919/55661/11325/83990/64848/9704/9785/57647/55794/168400/55760
CC	GO:0005925	focal adhesion	389	-0.319962	-1.7288	5.11189e-07	0.000129166	0.000112149	5102	tags=34%, list=20%, signal=28%	83692/1000/6208/7171/10211/23092/1495/10092/6156/55679/387/8895/6160/55612/867/5879/5094/5159/6278/4323/1012/3693/22801/6193/51474/9493/1601/6175/6189/2783/9260/9019/10278/2768/6169/10095/3728/23114/6217/10525/6129/9902/171024/2665/6155/5880/91179/7106/824/6143/59341/9349/6188/6207/23385/6204/11078/10487/3927/7739/8321/9181/6132/8936/6168/5244/6235/6125/3655/6136/143903/5754/6130/3695/1535/6222/6…
BP	GO:0050911	detection of chemical stimulus involved in sensory perception of smell	369	0.3115	1.73167	6.03455e-07	0.000147714	0.000128254	6768	tags=35%, list=27%, signal=26%	343563/390271/81285/283189/26188/403282/283092/390144/8387/8392/144125/26219/125962/390081/390437/79544/119682/150681/343171/219493/283297/390072/26246/81469/219432/403244/390082/283160/390077/283159/79324/81448/26683/346517/390059/79501/390436/219438/23538/26531/123041/127074/347169/441669/26737/219874/26648/338675/391109/127069/79290/219473/403277/26496/81697/441933/392391/26211/26664/441911/21…
MF	GO:0003729	mRNA binding	246	0.34132	1.81299	6.33942e-07	0.000150475	0.000130651	3671	tags=28%, list=15%, signal=25%	80149/79753/80315/64783/26354/7538/1654/5725/7536/3184/170506/57510/84248/4928/9908/1655/5937/10146/27254/5814/1660/10492/23524/23451/1993/8894/1973/56919/678/3183/9444/23013/54915/4691/1617/55692/55544/23034/2107/8939/8661/3182/22916/25929/7555/51585/7884/23369/26135/8570/10656/57055/22948/7175/58517/79048/9877/22849/3192/23283/549/7073/1995/51247/2926/10642/11051/3069/221662/677
BP	GO:0006913	nucleocytoplasmic transport	268	0.338455	1.81354	8.00977e-07	0.000179259	0.000155642	2760	tags=25%, list=11%, signal=22%	80149/9221/9972/1026/80824/6774/11260/6059/5494/23212/55308/10527/3838/84946/65083/51307/79711/51319/9984/1432/129401/29107/1871/57510/10762/5901/84248/4928/602/55781/51569/3842/9531/5905/11269/4792/60468/54888/6934/1660/55027/26953/23279/729857/1959/22916/4000/3553/23633/6789/51366/64328/3313/5781/84220/10526/7545/8312/55677/11214/7175/9883/10892/9877/1386/55341
BP	GO:0051169	nuclear transport	268	0.338455	1.81354	8.00977e-07	0.000179259	0.000155642	2760	tags=25%, list=11%, signal=22%	80149/9221/9972/1026/80824/6774/11260/6059/5494/23212/55308/10527/3838/84946/65083/51307/79711/51319/9984/1432/129401/29107/1871/57510/10762/5901/84248/4928/602/55781/51569/3842/9531/5905/11269/4792/60468/54888/6934/1660/55027/26953/23279/729857/1959/22916/4000/3553/23633/6789/51366/64328/3313/5781/84220/10526/7545/8312/55677/11214/7175/9883/10892/9877/1386/55341
MF	GO:0008186	ATP-dependent activity, acting on RNA	70	0.508341	2.21407	8.68469e-07	0.000183857	0.000159635	4187	tags=44%, list=17%, signal=37%	9188/1654/51202/64794/55308/57696/8886/170506/9879/1662/1655/11269/10146/79039/6832/1660/11056/57062/1665/1973/56919/55661/11325/83990/64848/9704/9785/57647/55794/168400/55760
MF	GO:0004984	olfactory receptor activity	367	0.30965	1.72139	8.57929e-07	0.000183857	0.000159635	6768	tags=35%, list=27%, signal=26%	343563/390271/81285/283189/26188/403282/283092/390144/8387/8392/144125/26219/125962/390081/390437/79544/119682/150681/343171/219493/283297/390072/26246/81469/219432/403244/390082/283160/390077/283159/79324/81448/26683/346517/390059/79501/390436/219438/23538/26531/127074/347169/441669/26737/219874/26648/338675/391109/127069/79290/219473/403277/26496/81697/441933/392391/26211/26664/441911/219981/40…
BP	GO:0030199	collagen fibril organization	55	-0.547642	-2.21525	9.5121e-07	0.000196074	0.000170243	5816	tags=47%, list=23%, signal=36%	60681/5033/4015/10491/1545/1290/50509/1303/4320/7373/7042/165/4060/1277/1289/4016/9509/11117/871/8985/84695/30008/1281/1278/2331/1305
BP	GO:1901605	alpha-amino acid metabolic process	174	0.382106	1.92608	1.55663e-06	0.000305683	0.000265411	7726	tags=54%, list=31%, signal=38%	441024/4552/4507/2618/9945/36/493/2730/10588/8564/468/51166/51582/3034/157739/4953/2747/84105/22929/2729/6999/8942/5471/79814/10841/5053/1638/5352/64577/383/2752/7915/389434/64087/60496/26227/29968/80150/4846/549/84706/130013/443/4329/22928/2805/2806/11112/51078/6470/3172/10165/4143/89874/1373/58510/23463/10157/2746/4482/51074/3712/2653/875/2356/27232/790/6898/23498/8659/3081/144193/143941/275/21…
BP	GO:0009991	response to extracellular stimulus	432	0.294014	1.65498	1.561e-06	0.000305683	0.000265411	3218	tags=23%, list=13%, signal=21%	80149/3949/80315/7538/54407/1026/133/6198/5292/81929/7378/5594/3625/4780/4914/1432/467/11170/81631/663/6722/2353/7071/2626/5562/9518/3162/5076/10634/2730/8493/154/34/51022/2153/7486/468/85569/6532/4217/847/23032/5164/10891/7481/6647/1965/4149/4852/7425/5788/96459/8915/2729/8942/22856/7494/353500/594/9463/5447/28960/5629/1032/6935/6652/6591/2695/57817/64127/2308/27327/383/590/2752/6781/3552/432/83…
BP	GO:0000956	nuclear-transcribed mRNA catabolic process	101	0.445438	2.06414	1.91468e-06	0.000349174	0.000303172	4041	tags=37%, list=16%, signal=31%	80149/2935/7538/10605/3184/170506/1655/201626/246175/1660/10492/23404/678/22894/23034/2107/3182/22916/28960/22803/27327/23644/51010/51154/79048/22849/3192/9704/219988/55795/7812/10642/677/54464/23708/255967/55802
MF	GO:0004386	helicase activity	137	0.408469	1.99506	1.97248e-06	0.000349174	0.000303172	4681	tags=38%, list=19%, signal=31%	9188/1654/1105/51202/64794/55308/23405/57696/92797/8886/170506/9879/1662/1655/11269/10146/79039/1763/89797/9557/6832/1660/11056/7486/57062/1665/1973/56897/56919/9401/1106/55636/55661/11325/83990/64848/546/9704/6594/9785/6595/84515/57647/55794/9044/168400/55760/23064/257218/164045/10111/10521
CC	GO:0005775	vacuolar lumen	156	-0.39506	-1.91286	1.9113e-06	0.000349174	0.000303172	5849	tags=38%, list=23%, signal=30%	2588/5538/913/10855/201294/114790/3425/1075/2719/5549/5707/10577/6317/1513/23646/5159/6278/1727/6037/29952/10437/375790/633/8804/972/4669/2665/79980/4353/4060/1634/175/10487/2239/1200/5645/5660/2548/53/3073/6448/3074/2444/1511/2896/2720/5036/4125/2760/4758/58485/1509/10493/2331/5476/5834/23400/4126/29108/2629
CC	GO:0005765	lysosomal membrane	344	-0.32967	-1.75233	2.05055e-06	0.000349174	0.000303172	4989	tags=33%, list=20%, signal=26%	5878/9725/10211/64601/57192/290/8992/8546/8895/114990/10948/528/80208/2782/124997/23646/1175/55823/910/4074/80342/7436/3109/8519/1601/3125/3108/27243/2783/79643/3326/9528/23503/26276/55255/1915/972/10548/20/51284/7098/51552/55737/7805/79901/5547/51092/684/84219/162/11182/163/56848/4818/10970/3111/529/23385/6272/10312/5660/10058/6836/1203/92421/89845/2548/10053/53/2770/3119/3115/81618/3916/51296/5…
CC	GO:0098852	lytic vacuole membrane	344	-0.32967	-1.75233	2.05055e-06	0.000349174	0.000303172	4989	tags=33%, list=20%, signal=26%	5878/9725/10211/64601/57192/290/8992/8546/8895/114990/10948/528/80208/2782/124997/23646/1175/55823/910/4074/80342/7436/3109/8519/1601/3125/3108/27243/2783/79643/3326/9528/23503/26276/55255/1915/972/10548/20/51284/7098/51552/55737/7805/79901/5547/51092/684/84219/162/11182/163/56848/4818/10970/3111/529/23385/6272/10312/5660/10058/6836/1203/92421/89845/2548/10053/53/2770/3119/3115/81618/3916/51296/5…
BP	GO:0031667	response to nutrient levels	406	0.295246	1.65993	1.98127e-06	0.000349174	0.000303172	3218	tags=23%, list=13%, signal=21%	80149/3949/80315/7538/54407/1026/133/6198/5292/81929/7378/5594/3625/4780/4914/1432/467/11170/81631/663/6722/7071/2626/5562/9518/3162/5076/10634/2730/8493/154/34/2153/7486/468/85569/6532/4217/847/23032/5164/10891/7481/6647/1965/4149/4852/7425/96459/8915/2729/8942/22856/7494/353500/594/9463/5447/28960/5629/1032/6935/6652/6591/2695/57817/64127/2308/27327/383/590/2752/6781/3552/83990/5313/1649/2180/9…
CC	GO:0005746	mitochondrial respirasome	70	-0.498813	-2.13339	2.62252e-06	0.000437068	0.000379487	6059	tags=47%, list=24%, signal=36%	4702/1537/4731/7384/7381/84419/1355/1347/1349/4708/6834/4710/4722/126328/4705/7386/4714/7388/4726/84701/4709/1340/1346/54539/56901/4725/4713/1351/4701/4704/51079/4728/4696
BP	GO:0007608	sensory perception of smell	392	0.294524	1.64914	2.78082e-06	0.000448025	0.000389001	6768	tags=35%, list=27%, signal=26%	343563/390271/81285/283189/26188/403282/283092/390144/8387/8392/89797/144125/26219/125962/390081/390437/79544/119682/150681/343171/219493/283297/390072/26246/81469/219432/403244/390082/283160/390077/283159/79324/81448/26683/346517/390059/79501/390436/341359/219438/23538/26531/123041/127074/347169/441669/26737/219874/26648/338675/391109/127069/79290/219473/403277/26496/81697/441933/4685/392391/262…
BP	GO:0007606	sensory perception of chemical stimulus	449	0.284361	1.61739	2.80266e-06	0.000448025	0.000389001	6988	tags=37%, list=28%, signal=27%	343563/390271/81285/80834/283189/26188/403282/728/283092/390144/8387/8392/89797/144125/26219/125962/390081/390437/79544/119682/150681/343171/219493/283297/4852/390072/26246/81469/219432/403244/390082/283160/50840/132112/50837/390077/765/283159/3933/79324/81448/26683/346517/390059/79501/390436/341359/219438/23538/26531/123041/127074/347169/441669/26737/219874/26648/338675/259292/391109/127069/5083…
BP	GO:1901361	organic cyclic compound catabolic process	423	0.289152	1.62454	3.794e-06	0.000594367	0.000516063	5413	tags=34%, list=22%, signal=27%	80149/2935/7538/7378/54657/10605/23405/4780/1432/3184/170506/1655/201626/54888/27254/3162/1736/60493/956/1763/246175/3290/6832/1660/10492/23404/10588/8564/200424/5446/10179/678/22894/3183/3251/54915/1617/23034/2107/1544/6999/1244/3182/22916/8942/57089/22868/1806/28960/5053/4128/6996/22882/6093/1576/2053/51733/22978/23369/22803/10924/27327/26135/64577/87178/8570/23644/60528/79882/5142/57055/51010/…
BP	GO:0061157	mRNA destabilization	75	0.46713	2.05164	4.08942e-06	0.000616009	0.000534853	4369	tags=41%, list=17%, signal=34%	80149/7538/10605/3184/170506/201626/246175/1660/10492/23404/678/22894/54915/23034/28960/6093/27327/87178/8570/51010/22849/3192/219988/7812/10642/221662/677/255967/55802/253943/339345
BP	GO:0050684	regulation of mRNA processing	106	0.42509	1.98203	4.02229e-06	0.000616009	0.000534853	5086	tags=40%, list=20%, signal=32%	64783/5725/6651/10150/9589/6732/7536/170506/4928/1859/1655/6294/1660/23144/10179/9444/4691/9588/22916/10250/23210/79882/10656/55677/58517/22849/3192/51574/55234/29896/11051/55796/221662/677/5978/11338/904/10521/708/1025/2332/54623
BP	GO:0048511	rhythmic process	271	0.323734	1.73679	4.42169e-06	0.000653492	0.000567399	4442	tags=28%, list=18%, signal=23%	8864/10135/1407/3727/8239/3397/60675/1958/10499/4914/1387/9099/3184/6095/2069/1859/3037/3131/7071/4783/1655/5562/196/7337/3814/4327/23596/1660/55366/59338/55294/7043/468/6532/9572/10891/1642/1457/1959/8204/1453/4800/6421/7130/9112/25942/5629/3398/9510/1644/10059/3363/54551/94233/4915/3192/6777/4846/2309/55068/8945/687/7124/5582/2146/3172/15/9611/1437/558/8431/80045/5591/4313/23064/835
BP	GO:0071347	cellular response to interleukin-1	103	0.435356	2.01822	5.02583e-06	0.000718443	0.000623793	1975	tags=29%, list=8%, signal=27%	80149/4609/3656/54726/11213/9590/3557/7189/1958/3625/6348/1051/6095/3037/6349/414062/4824/9100/8564/6355/9572/4790/3091/388372/7850/5970/6354/9705/3553/6347
CC	GO:0005788	endoplasmic reticulum lumen	280	-0.331171	-1.71944	5.0446e-06	0.000718443	0.000623793	6685	tags=41%, list=27%, signal=31%	10272/64856/7184/10961/11173/10618/2326/81567/2519/845/1861/64714/2621/1286/8614/3270/60681/85301/5589/1285/5033/813/1297/11098/64374/10098/567/3956/1075/4240/10491/2719/1293/337/1000/23193/5155/1295/1296/1522/57104/51280/4221/1287/4148/1290/1298/27433/80020/23621/1307/50509/1299/1303/5954/54431/1906/5955/7373/56034/1282/10525/11093/6696/3490/11167/54972/10970/2882/51738/59272/51561/1277/54982/57…
BP	GO:0046685	response to arsenic-containing substance	31	0.638023	2.30256	5.59849e-06	0.000783088	0.000679922	3317	tags=42%, list=13%, signal=36%	80149/4609/54407/1654/467/170506/3162/6047/468/2729/9446/1543/79752
CC	GO:0098803	respiratory chain complex	68	-0.491455	-2.07859	5.71729e-06	0.000785676	0.000682168	6059	tags=46%, list=24%, signal=35%	4702/1537/4731/7384/7381/84419/1347/1349/4708/4710/4722/126328/4705/7386/4714/7388/4726/84701/4709/1340/1346/54539/56901/4725/4713/1351/4701/4704/51079/4728/4696
BP	GO:0043484	regulation of RNA splicing	111	0.417901	1.96465	6.69899e-06	0.00090471	0.00078552	3908	tags=32%, list=16%, signal=28%	64783/54407/5725/57018/6651/10150/9589/23076/6732/7536/4928/1859/1655/57716/10179/9444/4691/9588/55544/10137/10250/1195/23210/10656/284695/3185/58517/3192/51574/55234/29896/2926/55796/221662/5978/11338
BP	GO:0070555	response to interleukin-1	129	0.402702	1.9401	7.25038e-06	0.000962581	0.000835767	3529	tags=32%, list=14%, signal=27%	80149/4609/3656/54726/1116/11213/9590/3557/7189/1958/3625/6348/1051/6095/3037/6349/414062/4824/9100/8564/6355/9572/4790/8767/3091/388372/7850/5970/6354/2729/9705/3553/6347/2633/64848/6364/3280/2690/361/6368/3569
BP	GO:0002237	response to molecule of bacterial origin	308	0.30928	1.67968	7.67547e-06	0.00100203	0.000870022	2982	tags=24%, list=12%, signal=21%	80149/5606/3656/5054/57162/10221/7538/11213/3727/133/6198/2643/9590/5594/7189/6197/1432/6348/19/1051/5732/7066/2853/2353/728/79931/3394/1604/4792/23328/29126/9076/941/721/22904/2920/6279/3593/8564/7097/148022/1948/9572/4790/8767/6280/5970/57088/8915/7494/3553/84868/245937/6347/10935/6868/7099/57817/64127/7855/383/3552/5142/338/2693/10892/5027/3158/7356/9261/10865/8754/1543/4846
MF	GO:0015453	oxidoreduction-driven active transmembrane transporter activity	52	-0.527872	-2.10462	8.35145e-06	0.00105607	0.000916943	6059	tags=56%, list=24%, signal=42%	4702/1537/4731/7384/1355/1349/4708/6834/4710/4722/4705/11068/7386/4714/7388/4726/79901/84701/4709/1340/1346/4725/4713/1351/4701/4704/51079/4728/4696
BP	GO:0007005	mitochondrion organization	395	-0.295849	-1.60189	8.35907e-06	0.00105607	0.000916943	5019	tags=33%, list=20%, signal=27%	10645/7755/56993/1347/8506/65991/6720/11331/2876/3305/84266/10989/51142/8546/4708/6240/10962/65018/5018/11232/80025/1513/6834/55154/11152/23682/124997/79810/84557/255027/55823/4710/81858/1267/8834/4722/126328/57048/79135/83943/59286/51547/2021/27166/6790/4705/1906/409/26519/80119/8398/7386/665/4358/4714/5830/9049/91647/55737/83667/7157/26517/4709/1346/5880/8743/55486/1634/54539/2931/5716/54543/58…
BP	GO:0043648	dicarboxylic acid metabolic process	87	0.44487	2.01703	8.51308e-06	0.00105846	0.000919014	6455	tags=47%, list=26%, signal=35%	441024/4552/81034/2730/10588/8564/51166/5264/3034/2747/2729/8942/10841/2752/7915/2271/60496/4191/84706/130013/443/10840/2805/2806/8803/6470/58510/6573/2746/197322/8513/23475/2356/6898/23498/8659/47/144193/113235/92259/5106
CC	GO:0070469	respirasome	75	-0.476176	-2.06377	9.08219e-06	0.00109447	0.000950283	6126	tags=47%, list=24%, signal=35%	54902/4702/1537/4731/7384/7381/84419/1355/1347/1349/4708/6834/4710/4722/126328/4705/7386/4714/7388/4726/84701/4709/1340/1346/54539/56901/4725/4713/1351/4701/4704/51079/192286/4728/4696
BP	GO:0061014	positive regulation of mRNA catabolic process	78	0.458527	2.03069	9.00849e-06	0.00109447	0.000950283	4369	tags=41%, list=17%, signal=34%	80149/7538/10605/3184/170506/201626/246175/1660/10492/23404/678/22894/54915/23034/28960/6093/27327/87178/8570/51010/22849/3192/219988/7812/9567/10642/221662/677/255967/55802/253943/339345
BP	GO:0050779	RNA destabilization	78	0.457389	2.02565	9.96512e-06	0.00113837	0.000988397	4369	tags=41%, list=17%, signal=34%	80149/7538/10605/3184/170506/201626/246175/1660/10492/23404/678/22894/54915/23034/28960/6093/27327/87178/8570/51010/22849/3192/124245/219988/7812/10642/221662/677/255967/55802/253943/339345
CC	GO:0031227	intrinsic component of endoplasmic reticulum membrane	133	-0.397292	-1.88511	1.00278e-05	0.00113837	0.000988397	5450	tags=41%, list=22%, signal=32%	567/6252/26608/6786/6890/10237/11153/57171/1717/7108/51283/23471/142891/79993/3125/94005/8879/972/1798/91319/662/8733/54898/10170/64834/6892/57414/54344/3119/3115/3135/3107/54499/29927/3106/3105/3300/28972/347734/22845/51009/128869/6253/811/126129/3136/3134/54872/51604/26580/1201/7466/51614/10134
BP	GO:0030198	extracellular matrix organization	281	-0.321576	-1.66795	9.97597e-06	0.00113837	0.000988397	5816	tags=36%, list=23%, signal=28%	60681/85301/1285/4326/79148/5033/1297/5156/196264/4015/50939/10491/1545/1295/1296/169611/10211/2068/1287/1513/1290/333/55612/2264/1298/4323/11005/9622/151887/8190/1307/50509/1299/1303/25890/84627/55790/3914/2006/4320/4054/7373/4358/57326/7042/81031/6624/1282/11093/2295/4319/11095/7075/165/64094/4060/9719/10893/89932/4324/1277/4316/5768/84168/5645/2199/1289/3912/4016/59350/55512/6662/9509/11096/13…
BP	GO:0010035	response to inorganic substance	488	0.276401	1.58587	9.97697e-06	0.00113837	0.000988397	4700	tags=29%, list=19%, signal=24%	80149/4609/5515/54407/3725/7779/3727/2643/5594/1147/801/144402/5359/3625/4780/4914/3726/142/3184/127550/170506/2618/4489/5516/4499/4205/4493/2353/4501/2354/388/5562/10243/493/284111/7337/3162/5076/9076/4502/51022/1017/6279/59338/4490/468/4217/5074/847/8737/3091/6647/1965/56670/1956/5621/5970/30819/3981/1585/84919/2729/1544/7057/91683/6652/10935/1393/2695/57817/2308/9362/383/3552/54583/2203/5313/1…
BP	GO:0044283	small molecule biosynthetic process	494	0.273419	1.57354	1.04984e-05	0.00117477	0.00102	5422	tags=33%, list=22%, signal=26%	8864/262/55276/1407/80219/133/2643/3930/441024/1958/4552/4507/467/5771/2542/160760/50640/114883/2628/10447/5562/57486/2641/493/239/1579/34/23590/140838/8564/80271/247/468/9572/5164/10891/4790/1642/9444/6647/4837/3251/81616/2747/84105/1585/22929/1544/3990/8942/1559/7494/3553/57761/5447/1806/5053/5629/634/58526/6652/123876/6591/2695/1576/51733/5352/2308/6342/64577/23516/27010/2752/51360/5631/2247/2…
BP	GO:1903313	positive regulation of mRNA metabolic process	103	0.42376	1.96446	1.10557e-05	0.00121971	0.00105902	4369	tags=37%, list=17%, signal=31%	80149/7538/10605/3184/170506/4928/201626/246175/1660/10492/23404/678/22894/54915/4691/9588/23034/22916/28960/6093/27327/87178/8570/51010/22849/3192/29896/219988/7812/9567/10642/11051/221662/677/255967/55802/253943/339345
BP	GO:0045229	external encapsulating structure organization	284	-0.322947	-1.67965	1.12289e-05	0.00122161	0.00106067	5816	tags=36%, list=23%, signal=28%	60681/85301/1285/4326/79148/5033/1297/5156/196264/4015/50939/10491/1545/1295/1296/169611/10211/2068/1287/1513/1290/333/55612/2264/1298/4323/11005/9622/151887/8190/1307/50509/1299/1303/25890/84627/55790/3914/2006/4320/4054/7373/4358/57326/7042/81031/6624/1282/11093/2295/4319/11095/7075/165/64094/4060/9719/10893/89932/4324/1277/4316/5768/84168/5645/2199/1289/3912/4016/59350/7053/55512/6662/9509/110…
BP	GO:0072329	monocarboxylic acid catabolic process	112	0.412396	1.94488	1.23509e-05	0.00132527	0.00115067	7985	tags=55%, list=32%, signal=38%	51/83752/1579/34/5446/5264/5194/1892/39/1666/9663/2110/3033/6342/1381/6718/5825/340665/4051/549/1962/54363/57834/8660/84696/55268/10478/84129/23175/3712/171586/3295/30/37/84693/3952/3032/5191/32/8309/33/2184/5467/2109/54677/5106/208/9370/64902/23600/1384/2168/38/5105/390916/197257/5096/2639/8647/1056/35/189
BP	GO:0048024	regulation of mRNA splicing, via spliceosome	75	0.451243	1.98186	1.3542e-05	0.00143344	0.0012446	3908	tags=35%, list=16%, signal=29%	64783/5725/6651/10150/9589/6732/7536/4928/1859/1655/10179/9444/4691/9588/10250/23210/10656/58517/3192/51574/55234/29896/55796/221662/5978/11338
CC	GO:0090575	RNA polymerase II transcription regulator complex	218	0.335173	1.75265	1.37561e-05	0.00143669	0.00124742	3357	tags=26%, list=13%, signal=22%	4609/2959/3725/3727/6774/10153/23764/1876/2494/4780/467/22926/7027/1051/3726/6917/1871/2353/138474/3131/4783/90390/4778/2626/6873/60468/55509/1052/6934/129685/2355/1054/468/3091/4149/4800/84164/3182/6421/7494/25929/902/5994/1649/27097/8861/1386/865/8061/6938/7421/8295/1874/2967/1875/2957
BP	GO:0071243	cellular response to arsenic-containing substance	21	0.681705	2.22786	1.55578e-05	0.00158801	0.0013788	2158	tags=43%, list=9%, signal=39%	80149/4609/54407/1654/467/170506/3162/468/9446
BP	GO:1902532	negative regulation of intracellular signal transduction	434	0.278749	1.57139	1.56105e-05	0.00158801	0.0013788	2802	tags=20%, list=11%, signal=18%	4170/80149/1848/4609/10253/5606/1969/284996/197131/5515/200734/11213/1654/80824/6397/10114/5770/3708/8780/1827/117584/5494/8876/604/91663/4780/1847/9984/1432/467/54941/9529/5771/5329/81848/5516/6095/10625/1859/5140/79931/5562/493/4140/4976/5343/1849/9100/57493/5801/83787/4771/59338/8994/9572/8737/3091/3301/56658/5621/5970/5788/96459/8661/83737/7494/3553/10019/7057/1032/80196/94134/6591/7099/2308/…
BP	GO:0043620	regulation of DNA-templated transcription in response to stress	48	0.527128	2.13545	1.61756e-05	0.0016108	0.00139859	3712	tags=46%, list=15%, signal=39%	2034/3725/6197/1958/4780/467/22926/1051/9531/3162/7422/468/3091/5970/84699/3516/25942/51360/1649/9774/10636/571
CC	GO:0030176	integral component of endoplasmic reticulum membrane	129	-0.401622	-1.89669	1.64514e-05	0.0016108	0.00139859	5450	tags=41%, list=22%, signal=32%	567/6252/26608/6786/6890/10237/11153/57171/1717/7108/51283/23471/142891/79993/3125/94005/8879/972/1798/91319/662/8733/54898/10170/64834/6892/57414/54344/3119/3115/3135/3107/54499/29927/3106/3105/28972/347734/22845/51009/128869/6253/811/126129/3136/3134/54872/51604/26580/1201/7466/51614/10134
MF	GO:0140297	DNA-binding transcription factor binding	426	0.279528	1.57286	1.6255e-05	0.0016108	0.00139859	3102	tags=22%, list=12%, signal=20%	4609/10221/10915/2114/84193/2034/1407/2959/3725/5932/3727/6774/135112/10499/9063/604/9314/54880/4780/1432/1387/7027/1051/142/5771/6722/221037/4205/3204/602/2353/8545/10579/1655/90390/7159/2626/55646/4792/196/10634/5814/115950/79039/4824/1399/6934/1660/1054/5481/468/9113/56919/6910/4772/6736/10891/3091/1959/3301/8204/4149/23013/4691/171023/5970/8915/6911/2969/3516/6789/9112/25942/10014/5629/3398/6…
BP	GO:0019439	aromatic compound catabolic process	395	0.283889	1.58892	1.67946e-05	0.0016241	0.00141014	5412	tags=33%, list=22%, signal=26%	80149/2935/7538/7378/54657/10605/23405/1432/3184/170506/1655/201626/54888/27254/3162/1736/60493/956/1763/246175/6832/1660/10492/23404/10588/8564/200424/5446/10179/678/22894/3183/3251/54915/1617/23034/2107/6999/1244/3182/22916/8942/57089/22868/1806/28960/5053/4128/6996/22882/6093/2053/51733/22978/23369/22803/10924/27327/26135/64577/87178/8570/23644/60528/79882/5142/57055/51010/1807/5151/1773/51154…
BP	GO:1901606	alpha-amino acid catabolic process	83	0.453263	2.03894	1.75032e-05	0.00166904	0.00144915	8390	tags=67%, list=33%, signal=45%	4552/36/493/8564/51166/157739/2747/6999/8942/5053/64577/383/2752/64087/80150/4846/549/84706/130013/443/4329/2805/2806/11112/6470/4143/89874/58510/10157/2746/3712/2653/875/6898/23498/8659/3081/275/2184/2731/2954/4842/3155/5860/2572/64902/23576/1757/38/51380/10993/189/27165/23464/2875/51268
BP	GO:0007623	circadian rhythm	184	0.343791	1.76009	1.76854e-05	0.00166904	0.00144915	4437	tags=29%, list=18%, signal=24%	8864/10135/1407/3727/8239/3397/60675/1958/10499/4914/9099/3184/6095/1859/7071/4783/5562/196/7337/23596/55366/55294/468/6532/9572/10891/1642/8204/1453/6421/9112/25942/5629/3398/1644/3363/54551/94233/4915/3192/8945/687/7124/5582/2146/3172/15/9611/1437/8431/80045/5591/23064
BP	GO:0001819	positive regulation of cytokine production	430	0.282	1.58649	1.89487e-05	0.00176697	0.00153418	3637	tags=25%, list=14%, signal=21%	9188/3566/5054/57162/1116/89870/11213/3572/1654/6774/8780/6711/9590/1147/7189/1958/163486/3570/1432/6348/1051/170506/2867/8809/9308/6095/2069/602/728/2626/3394/1604/9173/10146/3162/29126/941/57493/1660/24145/3556/1054/3593/3329/7097/148022/247/468/56919/4210/26253/8737/8767/7481/3091/6647/5970/5788/3659/8915/64581/2268/8710/7494/3553/23633/11128/353514/7057/84868/245937/6868/7099/5781/64127/7855/…
BP	GO:1903209	positive regulation of oxidative stress-induced cell death	18	0.709373	2.23684	2.09063e-05	0.00190676	0.00165556	3812	tags=56%, list=15%, signal=47%	4170/55294/5074/8737/6647/6421/7099/2309/7124/5978
BP	GO:0046700	heterocycle catabolic process	376	0.290341	1.61574	2.09347e-05	0.00190676	0.00165556	5413	tags=34%, list=22%, signal=27%	80149/2935/7538/7378/54657/10605/23405/4780/1432/3184/170506/1655/201626/54888/27254/3162/1736/60493/956/1763/246175/6832/1660/10492/23404/10588/8564/200424/5446/10179/678/22894/3183/3251/54915/1617/23034/2107/6999/1244/3182/22916/8942/57089/22868/1806/28960/6996/22882/6093/51733/22978/23369/22803/10924/27327/26135/87178/8570/23644/60528/79882/5142/57055/51010/1807/5151/1773/51154/1548/79048/6049…
BP	GO:0008202	steroid metabolic process	294	0.304478	1.64319	2.1465e-05	0.00193259	0.00167799	5892	tags=38%, list=23%, signal=29%	3949/25976/133/54657/3930/1958/2494/185/19/7536/6095/114883/5562/54659/64746/1071/3290/59338/2330/9572/847/4790/6647/1585/4041/1544/3990/1559/5447/4036/1589/5629/23461/6591/1576/2053/6342/51360/3552/338/1548/6770/51141/6718/5825/3158/27329/6777/340665/1543/9563/3972/51302/5444/51422/654/2230/3565/3156/7124/1558/3069/51170/335/3931/54577/6615/5978/8856/8630/3293/64816/6716/319/8912/50700/8431/1066…
CC	GO:0098644	complex of collagen trimers	21	-0.686846	-2.2096	2.26785e-05	0.00201865	0.0017527	6038	tags=76%, list=24%, signal=58%	1286/85301/1285/1295/1287/1290/1307/50509/1282/4060/1277/1289/1300/1284/1281/1278
BP	GO:0071276	cellular response to cadmium ion	35	0.585654	2.19311	2.38806e-05	0.00210177	0.00182487	1631	tags=40%, list=6%, signal=37%	3725/5594/1147/4489/4499/4493/2353/4501/3162/4502/4490/6647/1956/1544
BP	GO:0043488	regulation of mRNA stability	134	0.375587	1.82665	2.66936e-05	0.00230899	0.0020048	5507	tags=40%, list=22%, signal=31%	80149/7538/10605/1432/3184/170506/201626/27254/60493/246175/1660/10492/23404/678/22894/3183/54915/1617/23034/22868/28960/6093/23369/27327/26135/87178/8570/79882/57055/51010/22849/3192/7356/9261/219988/55795/7812/10642/221662/677/255967/55802/253943/339345/7432/1869/90806/8761/2332/6556/10758/79072/129563
BP	GO:0006401	RNA catabolic process	229	0.324013	1.70535	2.68247e-05	0.00230899	0.0020048	5205	tags=35%, list=21%, signal=28%	80149/2935/7538/10605/23405/1432/3184/170506/1655/201626/54888/27254/1736/60493/1763/246175/6832/1660/10492/23404/10179/678/22894/3183/54915/1617/23034/2107/3182/22916/22868/28960/22882/6093/23369/22803/27327/26135/87178/8570/23644/60528/79882/57055/51010/51154/79048/22849/3192/124245/7356/9261/9704/219988/55795/7812/9567/2926/246243/10642/221662/677/92345/54464/23708/255967/55802/55596/253943/33…
BP	GO:0032496	response to lipopolysaccharide	293	0.308227	1.66375	2.78512e-05	0.00237129	0.00205888	2982	tags=24%, list=12%, signal=21%	80149/5606/3656/5054/57162/10221/7538/11213/3727/133/6198/2643/9590/5594/7189/6197/1432/6348/19/1051/5732/7066/2353/79931/3394/1604/4792/23328/29126/9076/941/22904/2920/6279/3593/8564/7097/148022/1948/9572/4790/8767/6280/5970/57088/8915/7494/3553/84868/6347/10935/6868/7099/57817/64127/383/3552/5142/338/2693/10892/5027/3158/7356/9261/10865/8754/1543/4846
CC	GO:0016607	nuclear speck	330	0.289154	1.58234	3.01154e-05	0.00253649	0.00220233	2920	tags=21%, list=12%, signal=19%	8178/10135/64783/10915/2034/1452/57018/64332/6651/9589/9507/57602/9063/163486/6729/6732/51319/9984/1432/64318/11170/170506/29107/84248/7764/9879/1859/5562/6239/9360/23524/23451/7486/80271/1665/468/11193/6736/23198/3091/55589/8204/10285/50809/84164/6421/4000/23067/10250/10014/80196/143684/25831/11325/85403/79882/54815/202333/5994/27097/4152/55735/58517/3192/124245/6046/9774/55234/6938/5458
BP	GO:0006402	mRNA catabolic process	192	0.339321	1.74587	3.0542e-05	0.00254506	0.00220976	5719	tags=38%, list=23%, signal=29%	80149/2935/7538/10605/1432/3184/170506/1655/201626/27254/60493/246175/6832/1660/10492/23404/678/22894/3183/54915/1617/23034/2107/3182/22916/22868/28960/22882/6093/23369/22803/27327/26135/87178/8570/23644/79882/57055/51010/51154/79048/22849/3192/7356/9261/9704/219988/55795/7812/9567/10642/221662/677/54464/23708/255967/55802/253943/339345/7432/1869/90806/29974/8761/2332/6556/10758/79072/118460/1295…
BP	GO:0010608	post-transcriptional regulation of gene expression	433	0.274898	1.54928	3.14582e-05	0.00259381	0.00225209	5283	tags=31%, list=21%, signal=25%	80149/8864/9221/79753/2935/80315/7538/1654/6198/6774/6059/23645/6197/10605/23405/25983/54517/1432/9689/3184/170506/57510/5901/602/1655/1983/201626/54888/27254/1736/60493/246175/1660/10492/23404/1802/468/8994/678/22894/3183/8737/9444/1965/7257/54915/4691/1617/1956/23034/2107/84919/8575/9669/22916/285381/22868/2651/28960/55239/25929/7555/7057/8846/6093/23369/27327/26135/87178/8570/60558/79882/57055…
CC	GO:0043202	lysosomal lumen	89	-0.430855	-1.91899	3.27845e-05	0.00260509	0.00226188	5849	tags=40%, list=23%, signal=31%	2588/5538/913/10855/3425/2719/5549/10577/1513/23646/5159/10437/375790/633/972/4669/4060/1634/2239/1200/5660/2548/53/3073/6448/3074/2720/4125/2760/4758/1509/2331/5476/23400/4126/2629
BP	GO:0043062	extracellular structure organization	282	-0.321071	-1.66755	3.30355e-05	0.00260509	0.00226188	5816	tags=36%, list=23%, signal=28%	60681/85301/1285/4326/79148/5033/1297/5156/196264/4015/50939/10491/1545/1295/1296/169611/10211/2068/1287/1513/1290/333/55612/2264/1298/4323/11005/9622/151887/8190/1307/50509/1299/1303/25890/84627/55790/3914/2006/4320/4054/7373/4358/57326/7042/81031/6624/1282/11093/2295/4319/11095/7075/165/64094/4060/9719/10893/89932/4324/1277/4316/5768/84168/5645/2199/1289/3912/4016/59350/55512/6662/9509/11096/13…
BP	GO:0071375	cellular response to peptide hormone stimulus	267	0.308687	1.65293	3.31384e-05	0.00260509	0.00226188	3904	tags=27%, list=16%, signal=23%	4609/6198/6774/5770/9021/81565/3625/4780/185/142/5771/3716/5140/5905/5562/10580/9518/88/990/55022/5164/4790/5286/4149/133060/5970/760/1585/2729/114882/7494/3553/57761/5447/10014/634/9663/8835/1393/6093/5781/2308/23516/54206/383/83990/2203/8651/5313/1398/2693/51141/6653/3158/2689/3416/6777/5458/2690/5588/3481/8660/29904/2805/677/490/5829/815/1373/23175/7471
MF	GO:0061629	RNA polymerase II-specific DNA-binding transcription factor binding	317	0.296939	1.61628	3.31565e-05	0.00260509	0.00226188	3102	tags=24%, list=12%, signal=21%	10221/10915/2114/84193/2034/1407/2959/3725/5932/3727/6774/135112/10499/9063/9314/4780/1432/1387/1051/142/5771/6722/221037/4205/2353/10579/1655/90390/7159/2626/4792/196/10634/79039/4824/1399/6934/1660/5481/468/9113/6910/4772/10891/3091/1959/3301/8204/23013/171023/5970/8915/6911/2969/3516/6789/9112/25942/10014/5629/3398/23493/4853/2203/1649/23054/7110/8861/1386/10865/6777/3280/7421/64321/6594
BP	GO:0006631	fatty acid metabolic process	351	0.288268	1.5953	3.32578e-05	0.00260509	0.00226188	5892	tags=35%, list=23%, signal=27%	8864/51/1432/50640/7132/36/2181/1562/5562/51703/83752/239/1579/34/10434/247/5164/10891/5264/9444/5194/81616/1892/1544/3990/39/1559/7494/3553/57761/5447/1666/634/58526/9663/123876/2110/2695/1576/132949/3033/283748/6342/158584/2180/1548/2693/51141/199974/718/5825/79071/2169/8560/54988/23305/11283/85414/27329/1543/4051/549/149998/284541/51422/1962/54363/57834/53632/8660/84696/55268/1573/348158/51179…
BP	GO:0071222	cellular response to lipopolysaccharide	186	0.33931	1.73935	3.43338e-05	0.00266274	0.00231194	3615	tags=29%, list=14%, signal=25%	80149/5606/3656/5054/10221/7538/5594/7189/1432/6348/19/1051/7066/79931/3394/1604/4792/23328/29126/941/22904/2920/3593/8564/7097/148022/1948/9572/4790/8767/5970/57088/8915/7494/3553/84868/6347/7099/57817/64127/383/3552/5142/2693/10892/3158/10865/8754/4846/654/3569/22914/7124/1234
MF	GO:0140098	catalytic activity, acting on RNA	274	0.304962	1.63899	3.5119e-05	0.00269693	0.00234163	4187	tags=28%, list=17%, signal=24%	80149/9188/9533/1654/51202/64794/60487/55308/23405/80324/57696/8886/4234/170506/387338/9879/1662/1655/11269/10146/201626/54888/84172/79039/246175/6832/1660/23404/11056/57062/1665/10171/1973/56919/22894/25996/7257/64216/10785/9836/221078/127253/11128/28960/80746/8846/55661/23210/22803/56931/87178/11325/83990/60528/81875/64848/51010/10557/51110/92935/55520/9704/28987/57176/9785/246243/57647/55703/5…
BP	GO:0061013	regulation of mRNA catabolic process	147	0.372422	1.83668	3.55338e-05	0.0027023	0.00234629	5205	tags=38%, list=21%, signal=30%	80149/7538/10605/1432/3184/170506/201626/27254/60493/246175/1660/10492/23404/678/22894/3183/54915/1617/23034/3182/22868/28960/6093/23369/27327/26135/87178/8570/79882/57055/51010/79048/22849/3192/7356/9261/9704/219988/55795/7812/9567/10642/221662/677/255967/55802/253943/339345/7432/1869/90806/29974/8761/2332/6556/10758
CC	GO:0030686	90S preribosome	21	0.66447	2.17154	3.78337e-05	0.0028224	0.00245056	4165	tags=48%, list=17%, signal=40%	10199/9790/65083/55759/153443/134430/55272/23246/55813/26155
BP	GO:0043487	regulation of RNA stability	143	0.373507	1.83683	3.75643e-05	0.0028224	0.00245056	5205	tags=39%, list=21%, signal=31%	80149/7538/10605/1432/3184/170506/201626/54888/27254/1736/60493/246175/1660/10492/23404/678/22894/3183/54915/1617/23034/22868/28960/6093/23369/27327/26135/87178/8570/79882/57055/51010/22849/3192/124245/7356/9261/219988/55795/7812/10642/221662/677/92345/255967/55802/253943/339345/7432/1869/7133/90806/8761/2332/6556/10758
BP	GO:0044270	cellular nitrogen compound catabolic process	382	0.279378	1.5614	3.97796e-05	0.00293956	0.0025523	5412	tags=33%, list=22%, signal=26%	80149/2935/7538/7378/54657/10605/23405/1432/3184/170506/1655/201626/54888/27254/3162/1736/60493/956/1763/246175/6832/1660/10492/23404/10588/8564/200424/10179/678/22894/3183/3251/54915/1617/23034/2107/6999/1244/3182/22916/8942/57089/22868/5447/1806/28960/6996/22882/6093/1576/51733/22978/23369/22803/10924/27327/26135/87178/8570/23644/60528/79882/5142/57055/51010/1807/29958/5151/1773/51154/79048/604…
BP	GO:0071496	cellular response to external stimulus	268	0.305972	1.63948	4.03769e-05	0.00295581	0.0025664	3426	tags=25%, list=14%, signal=22%	80149/80315/54407/1026/9020/5292/81929/7378/5594/3625/4780/467/11170/8795/81631/6722/2353/7071/7132/9531/6416/5562/3162/10634/8493/51022/7486/8740/468/4217/23032/5164/4790/7481/1965/4149/5788/3659/96459/8915/2729/7494/3553/9463/28960/6591/7099/50848/2308/27327/2752/8772/432/83990/90226/220441/5027/1386/8061/213/7421/2309/51422/654/8797/53632
MF	GO:0140640	catalytic activity, acting on a nucleic acid	448	0.271565	1.54516	4.1857e-05	0.00300795	0.00261167	3816	tags=25%, list=15%, signal=21%	80149/9188/9533/5932/1654/1105/51202/64794/51455/60487/55308/23405/80324/57696/92797/8886/4234/170506/5980/387338/9879/1662/1655/11269/10146/201626/54888/84172/1736/79039/1763/89797/246175/7156/9557/54107/6832/1660/23404/11056/23626/7486/57062/1665/10171/1973/56897/56919/22894/116447/25996/7257/64216/1786/3981/10785/5426/9401/9836/221078/127253/2956/1106/11128/28960/80746/8846/55636/55661/6996/20…
BP	GO:0050906	detection of stimulus involved in sensory perception	465	0.264567	1.50856	4.14814e-05	0.00300795	0.00261167	8312	tags=43%, list=33%, signal=29%	4914/343563/390271/81285/80834/283189/26188/403282/388531/283092/390144/8387/8392/144125/26219/125962/390081/390437/79544/119682/150681/343171/219493/283297/51761/390072/26246/81469/219432/403244/390082/283160/50840/132112/50837/390077/765/283159/79324/81448/84694/26683/346517/390059/79501/94233/390436/219438/23538/26531/123041/127074/347169/441669/26737/219874/26648/338675/259292/391109/127069/5…
BP	GO:0071219	cellular response to molecule of bacterial origin	194	0.330407	1.70496	4.40826e-05	0.00313908	0.00272553	3615	tags=29%, list=14%, signal=25%	80149/5606/3656/5054/10221/7538/5594/7189/1432/6348/19/1051/7066/79931/3394/1604/4792/23328/29126/941/22904/2920/3593/8564/7097/148022/1948/9572/4790/8767/5970/57088/8915/7494/3553/84868/245937/6347/7099/57817/64127/7855/383/3552/5142/2693/10892/3158/10865/8754/4846/654/3569/22914/7124/1234
BP	GO:0036003	positive regulation of transcription from RNA polymerase II promoter in response to stress	22	0.664857	2.20061	4.57584e-05	0.00322906	0.00280365	2459	tags=50%, list=10%, signal=45%	4780/467/22926/1051/7422/468/3091/84699/3516/51360/1649
BP	GO:0030490	maturation of SSU-rRNA	39	0.558228	2.15197	4.75079e-05	0.00332259	0.00288486	3787	tags=49%, list=15%, signal=41%	23160/83732/9790/8780/23212/25983/92797/55781/57050/705/153443/11056/10171/79954/25926/28987/55813/57647/10799
BP	GO:0009062	fatty acid catabolic process	92	0.415478	1.89465	5.03916e-05	0.00349307	0.00303288	7946	tags=55%, list=32%, signal=38%	51/83752/34/5264/5194/1892/39/1666/9663/2110/3033/6342/5825/549/1962/54363/8660/84696/55268/10478/84129/23175/3712/171586/3295/30/37/84693/3952/3032/5191/32/8309/33/5467/2109/54677/5106/208/9370/23600/1384/2168/38/5105/390916/5096/2639/8647/1056/35
BP	GO:0043618	regulation of transcription from RNA polymerase II promoter in response to stress	43	0.532801	2.08585	5.09079e-05	0.00349791	0.00303708	2459	tags=40%, list=10%, signal=36%	2034/3725/1958/4780/467/22926/1051/9531/3162/7422/468/3091/84699/3516/25942/51360/1649
BP	GO:0035567	non-canonical Wnt signaling pathway	71	-0.456252	-1.9545	5.1668e-05	0.00351927	0.00305562	4634	tags=42%, list=18%, signal=35%	387/6424/5879/7484/115908/1601/4920/57154/84870/1952/8325/9968/85407/2239/8321/8323/7976/57674/54903/5754/57216/54361/6425/7474/4919/8326/128272/144165/2535/1856
BP	GO:0043434	response to peptide hormone	369	0.281011	1.56218	5.98482e-05	0.0040413	0.00350888	3904	tags=24%, list=16%, signal=21%	4609/1407/3727/133/6198/6774/5770/1958/9021/81565/3625/4780/1432/185/142/5771/3716/2069/5140/5905/5562/10580/9518/7049/88/7097/85569/990/847/55022/5164/4790/5286/25948/1959/4149/133060/5970/760/7425/1585/2729/114882/7494/3553/57761/5447/10014/634/9663/8835/1393/6093/2695/5781/2308/3033/23516/54206/383/87178/83990/2203/8651/5313/1398/2693/51141/6653/123041/3158/2689/3416/6777/5458/3795/2690/5588/3…
BP	GO:0044282	small molecule catabolic process	343	0.287962	1.58765	6.8449e-05	0.00458257	0.00397885	6271	tags=38%, list=25%, signal=29%	3628/7378/4552/9673/51/36/493/83752/1579/34/10588/8564/5446/51166/2712/5264/3034/157739/5194/1892/2747/4041/6999/8942/39/57089/594/1806/1666/10841/5053/9663/6652/2110/1576/51733/3033/6342/64577/383/2752/7915/64087/1381/6718/60496/5825/2820/80150/340665/1543/4846/4051/593/10930/3607/5208/549/51302/5444/84706/130013/1962/443/54363/57834/3099/18/4329/8867/8660/84696/55268/10840/10478/2805/2806/11112…
CC	GO:0030135	coated vesicle	271	-0.310437	-1.6008	7.24479e-05	0.00480919	0.00417561	5529	tags=34%, list=22%, signal=27%	201294/23259/567/8322/9182/3425/1075/65082/374/1314/64601/92840/6720/1522/8546/115548/8724/1212/1175/55823/4074/5872/11037/1601/3125/4920/8218/143187/460/9632/26276/1906/6572/972/915/10287/6441/51552/553115/7450/55690/286451/81562/163/11018/6272/554/917/4218/10053/4900/11015/5244/3119/3115/3135/3107/3106/11014/8673/3105/23423/11316/6844/7851/7474/10945/10959/59349/23245/28988/1211/160/55062/84251…
BP	GO:0000288	nuclear-transcribed mRNA catabolic process, deadenylation-dependent decay	55	0.478184	1.97241	7.30881e-05	0.00481092	0.00417711	4369	tags=44%, list=17%, signal=36%	7538/10605/3184/170506/201626/246175/1660/10492/23404/678/22894/23034/28960/27327/51010/22849/3192/219988/7812/10642/677/255967/55802/339345
BP	GO:0070741	response to interleukin-6	36	0.558247	2.11453	7.54415e-05	0.00488374	0.00424034	3729	tags=47%, list=15%, signal=40%	1116/3572/6774/3570/5771/3716/22904/55022/8737/4790/5970/9705/10402/57817/361/3569/3170
CC	GO:0098800	inner mitochondrial membrane protein complex	93	-0.416718	-1.86547	7.49427e-05	0.00488374	0.00424034	6059	tags=43%, list=24%, signal=33%	4702/1537/4731/7384/10245/7381/84419/1347/11331/10989/1349/4708/4710/4722/126328/79135/83943/4705/26519/7386/4714/7388/4726/84701/4709/1340/1346/54539/10651/56901/4725/4713/1351/84303/4701/4704/25813/51079/4728/4696
MF	GO:0003730	mRNA 3'-UTR binding	82	0.424759	1.89818	8.36897e-05	0.00537329	0.00466539	5317	tags=43%, list=21%, signal=34%	80149/80315/7538/3184/170506/1655/5937/27254/1993/678/3183/1617/25929/23369/26135/8570/57055/22948/79048/22849/3192/549/7073/1995/10642/11051/221662/677/3609/90806/8761/2332/113251/29894/26528
BP	GO:0046394	carboxylic acid biosynthetic process	283	0.297682	1.60011	8.44156e-05	0.00537583	0.0046676	5324	tags=34%, list=21%, signal=27%	8864/441024/4552/4507/50640/114883/2628/5562/493/239/1579/140838/8564/247/9572/9444/81616/2747/84105/22929/1544/3990/8942/1559/7494/3553/57761/1806/5053/5629/634/58526/123876/2695/1576/51733/5352/6342/64577/2752/5313/6770/51141/6718/60496/5825/26227/79071/8560/54988/29968/85414/1543/149998/51302/284541/51422/130013/57834/18/53632/84696/22928/348158/2805/1558/2806/8803/335/6470/6296/1373/2686/1015…
CC	GO:0019774	proteasome core complex, beta-subunit complex	10	-0.81351	-2.07495	8.65566e-05	0.00542399	0.00470941	2261	tags=60%, list=9%, signal=55%	5699/5698/5692/5693/5690/5696
CC	GO:0005667	transcription regulator complex	447	0.270425	1.53524	8.62645e-05	0.00542399	0.00470941	3877	tags=24%, list=15%, signal=20%	4609/2034/2959/3725/5932/57708/3727/6774/10153/23764/10499/1876/2494/9314/4780/467/22926/1387/7027/1051/3726/142/6917/1871/127343/10625/4205/2353/138474/3131/4783/90390/4778/2626/6873/60468/196/4194/8538/55509/1052/6934/129685/1017/2355/1054/468/8994/4772/4084/3091/1457/4149/23013/4800/5970/84164/3182/6421/7494/3516/6496/9112/25929/902/6913/25942/2117/404281/23493/9014/6907/54815/5994/1649/27097/…
BP	GO:0071216	cellular response to biotic stimulus	218	0.316662	1.65586	8.86734e-05	0.00551253	0.00478629	3656	tags=28%, list=15%, signal=24%	80149/5606/3656/5054/10221/7538/5594/7189/1432/6348/19/1051/7066/79931/3394/1604/4792/23328/29126/941/22904/2920/3593/8564/7097/148022/1948/9572/4790/8767/5970/57088/84919/8915/64581/7494/3553/84868/245937/6347/4853/7099/57817/64127/7855/383/3552/5142/1649/2693/10892/3158/10865/8754/4846/654/3569/22914/7124/1234/57003
BP	GO:0032868	response to insulin	230	0.312221	1.6381	0.000103235	0.00636723	0.00552839	4011	tags=26%, list=16%, signal=22%	4609/1407/133/6198/5770/1958/9021/81565/3625/1432/142/5771/5140/5562/10580/7097/85569/847/55022/5164/5286/25948/1959/4149/133060/7425/2729/114882/7494/3553/57761/10014/634/9663/5781/2308/3033/23516/54206/2203/8651/5313/2693/51141/6653/3158/3416/5458/3795/2690/5588/3481/8660/29904/2805/677/490/15/23175/5584
BP	GO:0051168	nuclear export	128	0.364491	1.75234	0.000108361	0.00657979	0.00571295	3255	tags=30%, list=13%, signal=26%	9972/80824/11260/6059/5494/23212/55308/84946/65083/9984/29107/57510/5901/84248/55781/9531/5905/11269/54888/6934/1660/23279/1959/22916/3553/64328/3313/5781/55677/11214/7175/9883/10892/9877/55341/55153/23511/55795
BP	GO:0042594	response to starvation	168	0.342143	1.72909	0.000108096	0.00657979	0.00571295	3218	tags=25%, list=13%, signal=22%	80149/80315/7538/54407/1026/133/81929/7378/5594/3625/4780/467/81631/7071/5562/10634/8493/34/7486/468/85569/4217/23032/10891/1965/4149/96459/7494/9463/2695/57817/2308/27327/2752/1649/220441/1386/3158/213/3607/2309/51422
BP	GO:0032922	circadian regulation of gene expression	59	0.479412	2.01522	0.000109243	0.00658231	0.00571513	1958	tags=29%, list=8%, signal=27%	8864/10135/1407/3397/1958/10499/9099/6095/196/55366/468/9572/10891/8204/1453/9112/3398
CC	GO:0045171	intercellular bridge	60	-0.472552	-1.94354	0.000111488	0.00666631	0.00578807	4715	tags=45%, list=19%, signal=37%	7507/64780/947/26240/1639/2948/3283/14/2944/2949/284252/10112/5768/63876/9727/30846/10848/2946/26471/60509/84861/10562/10039/200942/80263/8625/252839
BP	GO:0007042	lysosomal lumen acidification	11	-0.78911	-2.06791	0.000118694	0.00704343	0.0061155	2336	tags=64%, list=9%, signal=58%	54982/1203/2896/84317/10159/1201/252839
CC	GO:0042611	MHC protein complex	25	-0.632365	-2.12818	0.000124212	0.00731542	0.00635166	3980	tags=56%, list=16%, signal=47%	3109/3125/3108/3140/972/3111/3119/3115/3135/3107/3106/3105/3136/3134
BP	GO:1900151	regulation of nuclear-transcribed mRNA catabolic process, deadenylation-dependent decay	23	0.625001	2.10573	0.000132483	0.00770487	0.0066898	4369	tags=57%, list=17%, signal=47%	7538/10605/3184/170506/1660/10492/678/22849/3192/7812/10642/677/339345
BP	GO:0051258	protein polymerization	236	-0.315556	-1.61021	0.000132792	0.00770487	0.0066898	5704	tags=35%, list=23%, signal=27%	7408/11065/2934/1627/90952/6366/85462/9087/79822/6369/832/10092/10093/65018/387/119/55835/117854/57580/23406/9793/5879/8195/64857/5217/27243/9051/2006/79649/1639/345456/6709/10095/55761/2258/7114/84100/11151/1027/89848/59341/6188/7283/585/11078/6904/148170/8440/199/3071/8936/4733/9353/23580/50853/2314/22954/3925/25999/4926/403/28964/9168/80115/10344/5216/11075/10109/28988/54961/402/10844/10552/84…
CC	GO:0098576	lumenal side of membrane	33	-0.565243	-2.02008	0.000143957	0.00829129	0.00719896	3802	tags=42%, list=15%, signal=36%	3125/972/6892/3119/3115/3135/3107/3106/3105/811/3136/3134/5476/10134
BP	GO:0048193	Golgi vesicle transport	257	-0.311142	-1.59832	0.000146273	0.0083632	0.0072614	3284	tags=25%, list=13%, signal=22%	9117/64693/53407/10525/51552/553115/7805/583/9179/64764/65258/51272/662/81562/3996/7405/11018/114879/83871/6272/10139/55770/6892/4218/11015/27095/10066/582/11070/55614/3916/11014/55204/29091/377/403/8775/10791/23423/288/11316/6844/10945/10959/59349/128637/160/55062/10133/58485/1785/126003/54732/25839/90522/9341/22818/10067/381/1201/353376/8906/51614/10134
MF	GO:0070330	aromatase activity	24	0.622214	2.11358	0.000150477	0.00841918	0.00731	4998	tags=58%, list=20%, signal=47%	1562/1579/1544/1559/1576/199974/11283/1543/4051/57834/1558/64816/1557/1572
CC	GO:0071556	integral component of lumenal side of endoplasmic reticulum membrane	28	-0.59593	-2.05516	0.000149812	0.00841918	0.00731	3802	tags=46%, list=15%, signal=39%	3125/972/6892/3119/3115/3135/3107/3106/3105/811/3136/3134/10134
CC	GO:0098553	lumenal side of endoplasmic reticulum membrane	28	-0.59593	-2.05516	0.000149812	0.00841918	0.00731	3802	tags=46%, list=15%, signal=39%	3125/972/6892/3119/3115/3135/3107/3106/3105/811/3136/3134/10134
BP	GO:0017038	protein import	185	0.325127	1.66278	0.000153854	0.00854706	0.00742104	2723	tags=24%, list=11%, signal=21%	80149/9221/9972/1026/6774/10527/3838/51307/79711/1432/129401/80273/29107/1871/10762/5901/4928/602/51569/3842/9531/4792/83752/55027/3329/7984/26953/10452/729857/5194/4000/23633/6789/51366/84220/10526/134266/7545/257364/8504/9804/7175/9883/1386
BP	GO:2000767	positive regulation of cytoplasmic translation	12	0.773456	2.13526	0.000158756	0.00860384	0.00747034	3484	tags=75%, list=14%, signal=65%	10605/3184/170506/1660/10492/7555/3192/7812/10642
CC	GO:0045335	phagocytic vesicle	130	-0.371495	-1.75513	0.000159269	0.00860384	0.00747034	7290	tags=52%, list=29%, signal=37%	83547/23380/7879/51715/7431/8678/5322/10392/3133/26060/4688/4689/527/23208/2934/155066/567/6890/57192/8992/80223/25921/8724/1536/23682/7096/3693/252983/122618/112936/51284/4057/51552/11151/5880/4353/7405/51209/6850/306/83871/10312/6892/4218/3135/3107/23580/10981/1535/3916/3106/55198/54106/84329/8673/3105/9482/533/1785/811/4641/9140/9114/3136/3134/9341/81622
BP	GO:0006643	membrane lipid metabolic process	173	-0.33901	-1.66464	0.000157194	0.00860384	0.00747034	4874	tags=34%, list=19%, signal=27%	339221/338596/55650/80235/6484/5408/5587/142891/79993/9375/94005/5168/8879/8398/20/27293/8869/27090/65258/347735/8733/56848/5281/23556/54898/2525/25865/54982/581/130367/2528/5660/64834/3995/3815/3073/54344/55512/3074/2524/5279/221/2720/26301/27429/2760/4758/128869/9514/8705/64801/54872/51604/79690/285362/6610/5518/2629
BP	GO:0031331	positive regulation of cellular catabolic process	392	0.267088	1.49551	0.000156915	0.00860384	0.00747034	3675	tags=24%, list=15%, signal=21%	80149/3949/4609/10221/7538/1452/5770/51136/29979/10605/122809/25897/203228/4780/2773/22926/25820/3184/170506/9531/5562/201626/3162/154/246175/6832/1660/10492/23404/160418/55294/148022/4210/678/22894/5286/8767/3091/13/54915/1453/23034/2729/83737/55054/285671/3553/57761/28960/4036/1855/23130/94241/58476/8517/285180/6093/57817/64127/2308/25831/27327/257364/87178/8312/8570/90678/10769/51010/7416/2204…
BP	GO:0060071	Wnt signaling pathway, planar cell polarity pathway	53	-0.485684	-1.95189	0.000162321	0.00870865	0.00756134	4634	tags=45%, list=18%, signal=37%	387/5879/7484/115908/1601/4920/57154/84870/1952/9968/85407/2239/8321/8323/7976/54903/5754/57216/7474/4919/128272/144165/2535/1856
BP	GO:0010038	response to metal ion	333	0.280297	1.53818	0.000173611	0.00925096	0.00803221	4700	tags=30%, list=19%, signal=24%	5515/3725/7779/3727/5594/1147/801/144402/5359/3625/4780/3726/142/3184/127550/4489/5516/4499/4205/4493/2353/4501/2354/5562/10243/284111/3162/9076/4502/6279/4490/468/847/3091/6647/1965/56670/1956/5621/30819/3981/1585/2729/1544/7057/91683/6652/1393/57817/9362/383/3552/2203/5313/6857/341359/5027/3158/3778/148281/8754/3795/1543/6529/10242/673/817/654/64924/18/6263/131034/29904/3931/7781/4496/366/8913/…
BP	GO:0016053	organic acid biosynthetic process	285	0.296006	1.58919	0.000178523	0.00944848	0.0082037	5324	tags=34%, list=21%, signal=27%	8864/441024/4552/4507/50640/114883/2628/5562/493/239/1579/140838/8564/247/9572/9444/81616/2747/84105/22929/1544/3990/8942/1559/7494/3553/57761/1806/5053/5629/634/58526/123876/2695/1576/51733/5352/6342/64577/2752/5313/6770/51141/6718/60496/5825/26227/79071/8560/54988/29968/85414/1543/149998/51302/284541/51422/130013/57834/18/53632/84696/22928/348158/2805/1558/2806/8803/335/6470/6296/1373/2686/1015…
BP	GO:0090175	regulation of establishment of planar polarity	55	-0.465582	-1.88331	0.000184502	0.00969934	0.00842151	4634	tags=44%, list=18%, signal=36%	387/5879/7484/115908/1601/4920/57154/84870/1952/9968/85407/2239/8321/8323/7976/54903/5754/57216/7474/4919/128272/144165/2535/1856
BP	GO:0072657	protein localization to membrane	492	-0.26621	-1.46622	0.000191871	0.0100195	0.00869948	5741	tags=33%, list=23%, signal=26%	55625/5865/55704/2934/3753/57555/56889/64374/10098/9351/784/6727/1742/51024/3684/2719/64130/55333/1000/92162/130617/10211/56993/23043/177/3265/8546/23480/25921/8631/5018/115548/23241/51308/283576/51225/56246/23682/116444/23471/27237/5872/4323/6745/5764/9375/23265/4118/85377/10267/1601/6616/57154/342538/10966/131540/375790/9528/29800/26519/10548/3958/23096/5830/3728/23114/9344/2258/55737/583/84100…
MF	GO:0016887	ATP hydrolysis activity	277	0.290233	1.56308	0.000197183	0.0101614	0.00882273	4681	tags=29%, list=19%, signal=24%	9188/1654/1105/51202/64794/55308/57696/92797/8886/170506/3799/9879/1662/1655/11269/10146/83752/79039/1763/89797/9557/6832/1660/11056/7486/57062/3329/1665/1973/56897/56919/55582/6687/51182/4643/9401/1106/29028/55636/55661/6683/3313/79029/63971/547/11325/83990/24/64848/23347/27348/22948/10845/546/5825/27127/664618/9704/10939/9785/6595/84515/23095/57647/84896/490/55794/9044/168400/4621/4626/10576/99…
BP	GO:1901653	cellular response to peptide	327	0.278608	1.52682	0.00019594	0.0101614	0.00882273	3904	tags=25%, list=16%, signal=21%	4609/2358/6198/6774/5770/3397/837/9021/81565/3625/4780/185/142/5771/3716/5140/5905/5562/10580/9518/154/88/990/55022/5164/4790/5286/8767/4149/133060/5621/5970/760/1585/2729/114882/7494/3553/57761/5447/10014/634/9663/8835/1393/6093/7099/5781/64127/2308/23516/54206/383/83990/2203/8651/5313/1398/2693/51141/6653/3158/2689/3416/6777/5458/2309/2690/5588/3481/8660/29904/7124/2805/677/490/5829/815/1373/23…
BP	GO:1990830	cellular response to leukemia inhibitory factor	85	0.413474	1.8661	0.000200094	0.010244	0.00889444	3315	tags=28%, list=13%, signal=25%	10253/4144/9021/2494/9314/5990/55183/54941/129401/81848/9945/2730/22904/3720/4691/57539/26577/84159/3192/55892/9774/64321/9521/3099
BP	GO:0034612	response to tumor necrosis factor	217	0.306964	1.60591	0.000201738	0.0102611	0.00890931	3675	tags=29%, list=15%, signal=25%	80149/7538/1116/6198/2643/9590/5594/117584/1147/7189/837/4780/1432/6348/5771/5516/6095/3037/7132/4792/6349/329/414062/9076/4824/1660/6355/4217/9572/678/55022/8737/54469/28512/4790/388372/5970/6354/9705/7057/6347/1393/6868/57817/2633/64848/338/8995/6364/3875/8754/3280/3987/2309/6368/4671/2150/1540/7124/330/677/335
MF	GO:0008391	arachidonic acid monooxygenase activity	20	0.648392	2.09985	0.000207225	0.0104722	0.00909258	5508	tags=70%, list=22%, signal=55%	1562/1579/1559/1548/199974/1543/4051/284541/57834/1573/1558/1557/1572/1555
BP	GO:0061687	detoxification of inorganic compound	16	0.692315	2.09718	0.000209944	0.0105416	0.00915283	1288	tags=50%, list=5%, signal=47%	7779/4489/4499/4493/4501/4502/4490/847
BP	GO:0043331	response to dsRNA	50	0.473871	1.92356	0.000213126	0.0106332	0.00923234	2691	tags=36%, list=11%, signal=32%	9188/57162/11213/8780/5594/170506/4792/201626/6520/1660/148022/3448/4790/8767/64127/3452/3451/5027
BP	GO:0009636	response to toxic substance	209	0.316104	1.64953	0.000216199	0.0106509	0.00924768	4750	tags=32%, list=19%, signal=26%	7779/6198/5292/2643/3625/4780/6348/4489/6722/4499/4493/2353/4501/196/9076/4502/7097/1665/4490/468/5446/6532/847/2745/6280/6647/257202/9588/9429/23428/94241/10935/1644/2053/9446/383/83990/9376/4257/55244/84203/213/1543/4846/6571/6529/5444/79849/2936/7124/4496/5582/25841/1373/7296/4495/283120/6335/140809/127/2938/1066/128/6648/4255/29914/55937
BP	GO:0031668	cellular response to extracellular stimulus	208	0.315363	1.64098	0.000215548	0.0106509	0.00924768	3218	tags=23%, list=13%, signal=20%	80149/80315/54407/1026/5292/81929/7378/5594/3625/4780/467/11170/81631/6722/2353/7071/5562/3162/10634/8493/51022/7486/468/4217/23032/5164/1965/4149/5788/96459/7494/9463/28960/6591/2308/27327/2752/432/83990/90226/220441/5027/1386/8061/213/7421/2309/51422
BP	GO:0042558	pteridine-containing compound metabolic process	33	0.562056	2.05017	0.000220054	0.0106939	0.00928503	4931	tags=48%, list=20%, signal=39%	2643/441024/4552/2618/81034/10588/84105/10841/2346/60496/5805/10840/6470/6573/8836/2356
BP	GO:0019646	aerobic electron transport chain	58	-0.462938	-1.89372	0.000221168	0.0106939	0.00928503	6059	tags=43%, list=24%, signal=33%	4702/1537/4731/7381/1355/4708/65018/4710/4722/4705/7386/4714/7388/4726/84701/4709/1346/57017/23479/4725/4713/4701/4704/4728/4696
BP	GO:0014897	striated muscle hypertrophy	75	0.411397	1.80685	0.000220984	0.0106939	0.00928503	5411	tags=43%, list=22%, signal=34%	3572/10611/5062/142/4205/7132/2626/5756/493/8557/3720/4000/488/23493/6093/57817/2308/54206/11214/148/817/2146/4088/221476/4625/7222/7133/5997/183/1025/22876/3952
BP	GO:0046686	response to cadmium ion	56	0.465346	1.93064	0.000226091	0.0108648	0.00943347	2278	tags=36%, list=9%, signal=33%	3725/7779/5594/1147/4489/4499/4493/2353/4501/3162/4502/4490/847/6647/1956/5621/2729/1544/6652/383
MF	GO:0016655	oxidoreductase activity, acting on NAD(P)H, quinone or similar compound as acceptor	47	-0.498642	-1.94271	0.000256576	0.0122546	0.0106401	6059	tags=49%, list=24%, signal=37%	4702/4835/84883/4731/4708/4710/873/4722/4705/4714/4726/9540/8644/4709/1728/4725/4713/4701/4704/9946/51079/4728/4696
BP	GO:1990823	response to leukemia inhibitory factor	86	0.407319	1.83981	0.000259688	0.0123281	0.0107039	3315	tags=28%, list=13%, signal=24%	10253/4144/9021/2494/9314/5990/55183/54941/129401/81848/9945/2730/22904/3720/4691/57539/26577/84159/3192/55892/9774/64321/9521/3099
BP	GO:1903509	liposaccharide metabolic process	98	-0.396281	-1.79361	0.000265245	0.0125161	0.0108672	4874	tags=38%, list=19%, signal=31%	339221/338596/55650/80235/6484/5408/9375/94005/20/8869/27090/65258/8733/5281/23556/54982/581/2528/3815/3073/54344/313/3074/2524/5279/2720/26301/2760/4758/128869/9514/8705/54872/51604/79690/285362/2629
BP	GO:0003300	cardiac muscle hypertrophy	73	0.417354	1.82264	0.000269574	0.0126441	0.0109784	5411	tags=44%, list=22%, signal=35%	3572/10611/5062/142/4205/7132/2626/5756/493/8557/3720/4000/488/23493/6093/57817/2308/54206/11214/148/817/2146/4088/221476/4625/7222/7133/5997/183/1025/22876/3952
CC	GO:0010494	cytoplasmic stress granule	65	0.451636	1.94953	0.000275022	0.0128229	0.0111336	5208	tags=42%, list=21%, signal=33%	57532/7538/1654/55308/6780/203228/170506/9908/11269/10146/1965/54915/27067/55239/6093/23369/7073/7812/79752/10642/253943/1981/10482/8444/8761/2332/113251
BP	GO:0061158	3'-UTR-mediated mRNA destabilization	16	0.684567	2.07371	0.000283694	0.0131489	0.0114167	3671	tags=56%, list=15%, signal=48%	80149/7538/3184/170506/678/8570/22849/221662/677
BP	GO:0048002	antigen processing and presentation of peptide antigen	57	-0.471564	-1.9217	0.000287834	0.0132475	0.0115023	3980	tags=40%, list=16%, signal=34%	3109/10437/3125/3108/3140/972/3111/6892/30835/3119/3115/3135/3107/3106/3105/1510/54209/1785/1509/811/3136/3134/29108
BP	GO:0051236	establishment of RNA localization	133	0.344246	1.6739	0.000289203	0.0132475	0.0115023	2692	tags=25%, list=11%, signal=22%	9972/7538/81929/11260/25909/55308/65083/9984/129401/29107/57510/10762/5901/84248/4928/9908/11269/54888/1660/23144/23279/9444/22916/59343/23299/7884/87178/8570/55677/9804/7175/9883/9877
BP	GO:0032271	regulation of protein polymerization	171	-0.338513	-1.65494	0.000292661	0.013328	0.0115721	5704	tags=36%, list=23%, signal=28%	7408/2934/1627/90952/6366/9087/79822/6369/832/10092/10093/65018/387/119/23406/9793/5879/8195/64857/5217/2006/1639/345456/6709/10095/7114/11151/1027/89848/6188/585/11078/6904/148170/8440/3071/4733/9353/23580/50853/2314/3925/25999/4926/403/28964/9168/80115/10344/5216/11075/10109/28988/54961/402/10552/5058/11344/118/29108/274
BP	GO:0090150	establishment of protein localization to membrane	198	-0.325976	-1.6218	0.000294622	0.0133397	0.0115823	4714	tags=32%, list=19%, signal=26%	3265/8546/23480/5018/51308/283576/116444/23471/6745/4118/85377/6616/342538/131540/29800/26519/5830/9344/55737/583/84100/26517/353116/134/83871/581/10139/537/4218/6746/9409/9495/582/22883/29927/64689/2664/808/55204/2064/9270/10791/158866/9141/10815/288/6844/26003/100133941/25813/10133/51079/4641/6730/254359/90522/9341/22844/1020/1201/29082/83597/84885/64108
BP	GO:1901652	response to peptide	445	0.259969	1.47391	0.000306777	0.0138103	0.0119909	3904	tags=23%, list=16%, signal=20%	4609/1407/2358/3727/133/6198/6774/5770/3397/1958/837/9021/81565/3625/4780/1432/185/142/5771/3716/2069/5140/5905/5562/10580/4792/9518/7049/154/88/7097/85569/990/847/55022/5164/4790/5286/8767/25948/1959/4149/133060/5621/5970/760/7425/1585/2729/114882/7494/3553/57761/5447/10014/634/9663/8835/1393/6093/2695/7099/5781/64127/2308/3033/23516/54206/383/87178/83990/2203/8651/5313/1398/2693/51141/6653/1230…
BP	GO:0071356	cellular response to tumor necrosis factor	198	0.313274	1.6161	0.000316616	0.0141095	0.0122507	3675	tags=29%, list=15%, signal=25%	80149/7538/1116/9590/5594/117584/1147/7189/837/4780/1432/6348/5771/5516/6095/3037/7132/4792/6349/329/414062/9076/4824/1660/6355/4217/9572/678/55022/8737/54469/28512/4790/388372/5970/6354/9705/7057/6347/1393/6868/57817/2633/338/8995/6364/3875/3280/3987/2309/6368/4671/2150/1540/7124/330/677/335
BP	GO:0009896	positive regulation of catabolic process	452	0.252589	1.43787	0.000317027	0.0141095	0.0122507	3675	tags=23%, list=15%, signal=20%	80149/3949/4609/25976/10221/7538/1452/5770/51136/29979/10605/122809/25897/203228/4780/2773/22926/25820/3184/170506/9531/5562/201626/3162/80762/154/246175/6832/1660/10492/23404/160418/55294/148022/4210/678/22894/5286/1642/8767/3091/1457/13/54915/1453/23034/2729/83737/55054/285671/3553/57761/28960/4036/1855/23130/94241/58476/8517/285180/6093/57817/64127/2308/25831/27327/257364/87178/8312/8570/90678…
BP	GO:0006664	glycolipid metabolic process	97	-0.389391	-1.7609	0.000319961	0.0141596	0.0122942	4874	tags=37%, list=19%, signal=30%	339221/338596/55650/80235/6484/5408/9375/94005/20/8869/27090/65258/8733/5281/23556/54982/581/2528/3815/3073/54344/3074/2524/5279/2720/26301/2760/4758/128869/9514/8705/54872/51604/79690/285362/2629
BP	GO:1903320	regulation of protein modification by small protein conjugation or removal	216	0.310082	1.61899	0.000323826	0.0142502	0.0123728	3731	tags=27%, list=15%, signal=23%	80149/8864/10253/26271/57162/26354/2034/1407/54726/1654/23560/7189/29979/123879/1958/54602/9529/57561/11170/54552/10625/84259/23328/7337/329/22976/80762/55294/148022/8767/3091/3301/5970/54984/8915/2729/83737/285671/59343/57761/8555/9112/51366/64127/8312/23142/378884/91947/7336/10892/254170/25898/151636/8945/112401/27338/7332/330/5582
MF	GO:0008139	nuclear localization sequence binding	19	0.650534	2.07384	0.000332433	0.0143865	0.0124911	2666	tags=53%, list=11%, signal=47%	9221/9972/3838/79711/4928/3842/4792/26953/23633/9883
BP	GO:0030728	ovulation	23	0.604837	2.03779	0.000330975	0.0143865	0.0124911	5411	tags=65%, list=22%, signal=51%	4609/3566/3625/2069/4327/8204/7130/9510/4846/2309/4313/5241/3248/5997/3952
BP	GO:0019395	fatty acid oxidation	99	0.376136	1.74043	0.000332065	0.0143865	0.0124911	7766	tags=53%, list=31%, signal=36%	51/1432/5562/83752/239/34/10891/5264/5194/1892/39/5447/1666/2110/3033/6342/5825/549/51422/1962/54363/8660/55268/51179/10478/84129/127/128/3712/3295/30/37/285440/3952/3032/5191/32/8309/33/5467/2109/54677/208/8013/9370/23600/1384/2168/38/84649/2639/8647
CC	GO:0032040	small-subunit processome	27	0.574431	2.01688	0.000337639	0.0145315	0.012617	4831	tags=48%, list=19%, signal=39%	10199/65083/25983/57050/134430/10813/55272/79954/51077/55813/5591/9724/11103
CC	GO:0005844	polysome	60	-0.452125	-1.85952	0.000343308	0.0146947	0.0127588	4796	tags=47%, list=19%, signal=38%	6156/6234/7411/6160/10445/1938/6152/6173/6169/6231/55323/6170/6143/6142/6188/51389/6132/6227/6194/6235/4733/6171/6130/6192/4736/8667/25873/811
BP	GO:0071354	cellular response to interleukin-6	32	0.551297	2.00759	0.000363227	0.0154628	0.0134257	3529	tags=47%, list=14%, signal=40%	3572/6774/3570/5771/3716/22904/55022/8737/4790/5970/9705/10402/57817/361/3569
BP	GO:1903312	negative regulation of mRNA metabolic process	70	0.419471	1.827	0.000381719	0.0160753	0.0139575	5205	tags=44%, list=21%, signal=35%	7538/5725/10605/1432/3184/1859/1660/10492/3183/1617/3182/79882/57055/79048/3192/9261/9704/7812/10642/221662/11338/904/7432/708/1869/90806/29974/1025/2332/6556/10758
BP	GO:0034248	regulation of cellular amide metabolic process	379	0.262936	1.4645	0.000380254	0.0160753	0.0139575	3786	tags=23%, list=15%, signal=20%	80149/8864/9221/2935/80315/7538/1654/6198/6059/23645/6197/10605/25983/54517/4780/9689/3184/170506/602/114134/5562/1983/201626/246175/1660/10492/23404/1802/468/678/22894/5164/9444/1965/54915/4691/1617/5621/5970/23034/2107/84919/9669/22916/285381/347731/22868/28960/55239/25929/7555/7057/8846/6093/64127/23369/27327/87178/8570/60558/57055/51010/4915/7175/8662/6653/79048/22849/3192/84541/28969/219988/…
BP	GO:0006766	vitamin metabolic process	100	0.377407	1.74593	0.00039139	0.0163944	0.0142346	6256	tags=43%, list=25%, signal=32%	54657/441024/8876/4552/54659/81034/10588/4790/4837/2729/4036/11330/6591/1576/9446/27010/1381/154807/60496/29968/340665/1543/4051/6515/57834/80704/7124/6470/6615/6017/6573/157506/10196/29914/8854/2356/9962/8875/2638/57026/5467/171425/113235
BP	GO:0046688	response to copper ion	35	0.530459	1.98642	0.000394595	0.0164408	0.0142748	4602	tags=51%, list=18%, signal=42%	4780/4489/4499/4493/4501/4502/4490/6647/5621/6652/3552/1543/3931/4496/15/4017/4495/351
BP	GO:0031398	positive regulation of protein ubiquitination	105	0.377358	1.75913	0.000398489	0.0165151	0.0143394	3660	tags=35%, list=15%, signal=30%	57162/1407/1654/7189/29979/123879/54602/57561/11170/84259/7337/329/22976/80762/55294/148022/8767/8915/285671/59343/57761/8555/9112/64127/8312/23142/378884/91947/7336/10892/254170/25898/8945/112401/27338/7332/330
BP	GO:0010257	NADH dehydrogenase complex assembly	39	-0.524923	-1.94738	0.000405274	0.0166205	0.0144308	4679	tags=44%, list=19%, signal=36%	4708/5018/4710/4722/126328/4705/4714/4709/54539/91942/4725/4713/25880/4704/51079/4728/4696
BP	GO:0032981	mitochondrial respiratory chain complex I assembly	39	-0.524923	-1.94738	0.000405274	0.0166205	0.0144308	4679	tags=44%, list=19%, signal=36%	4708/5018/4710/4722/126328/4705/4714/4709/54539/91942/4725/4713/25880/4704/51079/4728/4696
BP	GO:0198738	cell-cell signaling by wnt	399	-0.27124	-1.47238	0.000409088	0.0166895	0.0144908	5228	tags=30%, list=21%, signal=24%	4693/10076/65268/2719/9839/1000/92162/1749/54475/9037/6206/23043/59352/387/8724/4286/64359/27122/7480/55612/6424/5879/7484/8820/5728/8796/6659/115908/7482/6597/1601/4920/57154/2625/55897/1906/5499/4776/84870/25806/57326/8607/3728/5310/3065/55737/84100/80114/3670/55716/1952/284654/2869/90780/8325/63923/51176/9968/2931/85407/9679/1277/2239/8321/28999/147495/8323/7976/6478/8313/1459/219771/80326/576…
CC	GO:0009295	nucleoid	37	0.531693	2.02932	0.000416904	0.016833	0.0146154	5596	tags=57%, list=22%, signal=44%	60493/1763/6832/116447/64216/22868/3313/60528/7416/10845/4350/2926/5428/55794/1373/6648/7019/37/7015/3032/292
CC	GO:0042645	mitochondrial nucleoid	37	0.531693	2.02932	0.000416904	0.016833	0.0146154	5596	tags=57%, list=22%, signal=44%	60493/1763/6832/116447/64216/22868/3313/60528/7416/10845/4350/2926/5428/55794/1373/6648/7019/37/7015/3032/292
BP	GO:0050657	nucleic acid transport	130	0.346889	1.67667	0.000451139	0.0180295	0.0156542	2692	tags=25%, list=11%, signal=23%	9972/7538/81929/11260/25909/55308/65083/9984/129401/29107/57510/10762/5901/84248/4928/9908/11269/54888/1660/23144/23279/9444/22916/59343/23299/7884/87178/8570/55677/9804/7175/9883/9877
BP	GO:0050658	RNA transport	130	0.346889	1.67667	0.000451139	0.0180295	0.0156542	2692	tags=25%, list=11%, signal=23%	9972/7538/81929/11260/25909/55308/65083/9984/129401/29107/57510/10762/5901/84248/4928/9908/11269/54888/1660/23144/23279/9444/22916/59343/23299/7884/87178/8570/55677/9804/7175/9883/9877
BP	GO:0044782	cilium organization	262	-0.297811	-1.52768	0.000455386	0.0181068	0.0157213	6760	tags=40%, list=27%, signal=30%	11127/55212/161514/83544/4750/25930/138639/164714/7275/1769/168448/644890/22873/29070/200162/26160/25809/5116/79734/51364/117177/150483/55704/2934/2622/3784/80321/51382/8481/57545/285331/27152/85462/51256/10198/80173/79867/51626/10309/3175/84314/54970/26005/55835/64518/79874/56171/27148/9696/79989/8382/8195/85478/79738/54874/57096/1639/9742/64446/55761/9371/583/84100/2665/1952/79140/166379/347240…
BP	GO:0016055	Wnt signaling pathway	397	-0.2723	-1.47212	0.000464323	0.0183689	0.0159489	5228	tags=30%, list=21%, signal=25%	4693/10076/65268/2719/9839/1000/92162/1749/54475/9037/6206/23043/59352/387/8724/4286/64359/27122/7480/55612/6424/5879/7484/8820/5728/8796/6659/115908/7482/6597/1601/4920/57154/2625/55897/1906/5499/4776/84870/25806/57326/8607/3728/5310/3065/55737/84100/80114/3670/55716/1952/284654/2869/90780/8325/63923/51176/9968/2931/85407/9679/1277/2239/8321/28999/147495/8323/7976/6478/8313/1459/219771/80326/576…
BP	GO:0043030	regulation of macrophage activation	54	0.452754	1.85893	0.000467708	0.0184098	0.0159845	2312	tags=30%, list=9%, signal=27%	80149/3949/3566/3727/6348/6095/9173/3329/9572/5788/7057/84868/7099/57817/399687/90865
CC	GO:0031965	nuclear membrane	245	0.294692	1.56602	0.000474953	0.0186015	0.0161509	2811	tags=22%, list=11%, signal=19%	9972/64783/23223/7779/2643/9218/23560/3708/25909/3601/9589/3930/203228/55183/129401/10762/4928/3204/169714/23224/5905/6386/55151/163590/10434/11342/9722/1956/5621/79982/22929/1104/23200/114882/80314/59343/4000/27067/23592/6683/23369/23439/83990/166336/113878/27348/7175/9782/9883/5027/5048/148/5108
BP	GO:0007040	lysosome organization	62	-0.444539	-1.8372	0.000482145	0.0186042	0.0161532	3078	tags=34%, list=12%, signal=30%	4669/51552/55737/7805/11151/51172/83871/54982/1200/1203/2548/53/3074/2896/29911/84317/10159/1201/64400/2629/252839
BP	GO:0080171	lytic vacuole organization	62	-0.444539	-1.8372	0.000482145	0.0186042	0.0161532	3078	tags=34%, list=12%, signal=30%	4669/51552/55737/7805/11151/51172/83871/54982/1200/1203/2548/53/3074/2896/29911/84317/10159/1201/64400/2629/252839
BP	GO:0043414	macromolecule methylation	224	0.301846	1.58133	0.000479439	0.0186042	0.0161532	2978	tags=21%, list=12%, signal=19%	4609/2935/64783/84193/60487/9589/4552/54880/55183/1387/4234/142/387338/2353/5929/2641/54888/8493/22976/10782/3720/200424/4837/64216/1786/4800/10785/2107/51742/9836/221078/4000/23067/127253/9463/6018/51605/27136/23476/54815/63978/55677/80204/546/51574/9545/2145/1543
BP	GO:0070498	interleukin-1-mediated signaling pathway	27	0.562706	1.97571	0.000484878	0.0186179	0.0161651	1765	tags=37%, list=7%, signal=34%	3656/54726/11213/3557/7189/1958/7850/5970/9705/3553
BP	GO:0043254	regulation of protein-containing complex assembly	337	-0.277432	-1.47154	0.000498222	0.0190369	0.0165289	4646	tags=31%, list=18%, signal=26%	7408/2934/1627/90952/54751/114609/6366/55355/55011/9087/79822/6369/832/10092/10093/65018/387/8631/119/7480/55612/23406/9636/9793/5879/57763/8195/79738/64857/5217/2006/1639/81857/345456/6709/115362/3958/10095/6624/5830/7341/7114/55737/3670/11151/1027/7067/7157/89848/1410/6188/6850/585/56937/11078/581/6904/148170/8440/3071/4733/9353/23580/6662/50853/2314/4091/5590/3925/638/25999/29091/9641/6403/492…
MF	GO:0035925	mRNA 3'-UTR AU-rich region binding	26	0.577714	2.00836	0.000506862	0.0192731	0.016734	3671	tags=46%, list=15%, signal=39%	80149/7538/3184/170506/678/8570/22849/7073/1995/11051/221662/677
BP	GO:1903322	positive regulation of protein modification by small protein conjugation or removal	122	0.348548	1.67664	0.000511705	0.0193632	0.0168122	3660	tags=32%, list=15%, signal=27%	80149/57162/26354/1407/1654/7189/29979/123879/54602/57561/11170/84259/7337/329/22976/80762/55294/148022/8767/8915/285671/59343/57761/8555/9112/64127/8312/23142/378884/91947/7336/10892/254170/25898/8945/112401/27338/7332/330
BP	GO:0036499	PERK-mediated unfolded protein response	18	0.639086	2.01521	0.000520344	0.0195955	0.0170139	2459	tags=44%, list=10%, signal=40%	5770/23645/4780/5771/468/1965/84919/1649
BP	GO:0071248	cellular response to metal ion	179	0.309985	1.57826	0.000538871	0.0201961	0.0175354	4665	tags=30%, list=19%, signal=25%	3725/3727/5594/1147/144402/3625/4780/3726/142/127550/4489/4499/4205/4493/2353/4501/2354/5562/284111/3162/9076/4502/4490/468/6647/1965/1956/5621/3981/1585/1544/91683/1393/9362/2203/6857/341359/148281/1543/673/817/654/6263/131034/29904/4496/6861/4495/8912/151835/27132/2978/351/664
BP	GO:0033108	mitochondrial respiratory chain complex assembly	55	-0.445736	-1.80303	0.000541678	0.0202046	0.0175428	4679	tags=38%, list=19%, signal=31%	4708/5018/6834/4710/4722/126328/83943/4705/7386/4714/4709/54539/91942/4725/4713/25880/4704/25813/51079/4728/4696
BP	GO:0031123	RNA 3'-end processing	83	0.403399	1.81464	0.000553382	0.0205433	0.0178369	6011	tags=48%, list=24%, signal=37%	170506/26512/1736/6832/23404/23144/55339/25896/56903/22916/10978/51585/7884/87178/60528/79882/51010/22849/51574/23283/55520/81608/25888/2926/11051/677/904/55511/351/57508/10898/1025/54623/29894/118460/91746/10914/53981/26173/3297
BP	GO:0030041	actin filament polymerization	143	-0.348054	-1.6676	0.000561474	0.0207454	0.0180123	5704	tags=37%, list=23%, signal=29%	7408/2934/1627/90952/6366/85462/9087/79822/6369/832/10092/10093/387/119/57580/23406/5879/8195/64857/5217/9051/2006/345456/6709/10095/55761/7114/11151/89848/585/11078/148170/8440/199/3071/8936/9353/23580/50853/2314/9168/80115/10344/5216/10109/28988/54961/10552/11344/118/29108/274/79778
MF	GO:0015399	primary active transmembrane transporter activity	141	-0.349939	-1.67694	0.000572106	0.021039	0.0182673	6139	tags=39%, list=24%, signal=30%	215/4702/527/1537/4731/7384/155066/491/6890/1355/11194/8992/1349/4708/528/6834/4710/4722/4705/11068/7386/20/4714/7388/4726/79901/84701/4709/1340/1346/64240/529/10257/10058/6892/3764/89845/4725/5244/9619/489/4713/1351/9296/10057/64241/4701/4704/1080/51079/4728/9114/23400/4696/90423
BP	GO:1902369	negative regulation of RNA catabolic process	61	0.430227	1.82631	0.000581369	0.0212797	0.0184763	5205	tags=46%, list=21%, signal=36%	7538/10605/1432/3184/170506/54888/1736/1660/10492/3183/1617/3182/57055/79048/3192/9261/9704/7812/10642/221662/92345/7432/1869/90806/29974/2332/6556/10758
BP	GO:0042116	macrophage activation	95	0.375617	1.7177	0.000588754	0.0214498	0.0186239	3637	tags=31%, list=14%, signal=26%	80149/3949/3566/3725/2358/3727/6348/6095/728/9173/22904/3329/7097/148022/9572/56670/5788/7057/84868/7099/23210/57817/399687/90865/3459/3565/3569/7124/1191
BP	GO:0045722	positive regulation of gluconeogenesis	12	0.741547	2.04717	0.000602736	0.0218576	0.018978	2207	tags=50%, list=9%, signal=46%	5771/2641/10891/1642/4837/2308
MF	GO:0004674	protein serine/threonine kinase activity	385	0.257692	1.44255	0.000614052	0.0221653	0.0192452	4857	tags=26%, list=19%, signal=22%	5606/3656/83732/91/1452/11213/9020/6198/5292/10114/5062/8780/5594/1147/5255/83931/6197/6732/1432/5597/415116/6348/1326/55781/1859/138474/23678/6416/91754/5562/4140/8493/9748/84254/54101/7049/8844/1017/8814/1456/9113/4217/8737/8767/1457/55589/57551/3985/1956/1453/814/6789/1195/4117/5596/10188/6093/9625/23476/6792/115701/10769/56164/8997/11214/6046/9261/5063/80216/673/9448/51422/817/112858/5588/926…
MF	GO:0008381	mechanosensitive ion channel activity	12	-0.736244	-1.97756	0.000642403	0.022464	0.0195045	5368	tags=75%, list=21%, signal=59%	117531/342125/9725/79838/59341/50801/147138/11322/147798
CC	GO:0005747	mitochondrial respiratory chain complex I	38	-0.513975	-1.90295	0.00063911	0.022464	0.0195045	4679	tags=42%, list=19%, signal=34%	4708/4710/4722/126328/4705/4714/4726/4709/54539/4725/4713/4701/4704/51079/4728/4696
CC	GO:0030964	NADH dehydrogenase complex	38	-0.513975	-1.90295	0.00063911	0.022464	0.0195045	4679	tags=42%, list=19%, signal=34%	4708/4710/4722/126328/4705/4714/4726/4709/54539/4725/4713/4701/4704/51079/4728/4696
CC	GO:0045271	respiratory chain complex I	38	-0.513975	-1.90295	0.00063911	0.022464	0.0195045	4679	tags=42%, list=19%, signal=34%	4708/4710/4722/126328/4705/4714/4726/4709/54539/4725/4713/4701/4704/51079/4728/4696
BP	GO:0032963	collagen metabolic process	81	-0.399638	-1.74815	0.000636016	0.022464	0.0195045	4533	tags=40%, list=18%, signal=32%	1513/3066/5159/4323/26276/4320/409/9902/4319/55323/10893/4324/1277/4316/5645/1289/57333/55512/9509/3673/54361/114757/2191/11117/8751/652/2022/1471/871/8510/8985/1278
BP	GO:0120031	plasma membrane bounded cell projection assembly	400	-0.266914	-1.44655	0.000640658	0.022464	0.0195045	6248	tags=36%, list=25%, signal=27%	1769/168448/644890/22873/6363/29070/200162/9459/26160/4983/25809/5116/79734/51364/117177/150483/55704/2934/2014/2622/3784/80321/51382/8481/57545/3636/6366/285331/27152/85462/51256/10198/832/80173/23043/89846/79867/51626/10309/3175/3265/84314/51225/54970/53827/26005/55835/64518/79874/4070/5879/56171/27148/54828/9696/79989/8382/1012/8195/85478/79738/54874/79574/10451/5217/375790/57096/1639/64787/97…
MF	GO:0001216	DNA-binding transcription activator activity	437	0.250332	1.416	0.000626911	0.022464	0.0195045	3795	tags=23%, list=15%, signal=20%	4609/2034/3725/3727/6774/23764/1958/5359/2494/9314/5990/4780/7101/467/22926/7027/1316/1051/3726/1871/6722/4205/3204/2353/3131/7071/2354/2626/9889/6239/8538/1052/55922/2355/1054/1761/5015/468/6910/26205/4772/4790/3091/1959/3226/1997/5970/3659/29841/84699/2969/3516/7572/6496/6018/353274/3198/404281/54897/3196/2308/7545/2551/7594/5994/1649/256297/25850/1386/51804/5459/8061/22887/7716/6938/6777/5458/…
BP	GO:0009100	glycoprotein metabolic process	316	-0.281815	-1.48384	0.000657545	0.0228913	0.0198755	5868	tags=32%, list=23%, signal=25%	29880/50515/6185/5589/2134/64377/10855/26574/93611/3425/29071/6366/10090/9917/596/23193/2137/91445/57171/6184/2132/26270/338596/10331/10206/26229/10610/170384/6484/200185/50859/9375/10267/55624/55790/113189/9528/9486/6569/633/1798/20/124583/2523/81031/192134/91319/11093/8869/9452/27090/63941/29954/51172/1634/175/79623/2525/23385/2528/51006/54344/6448/10164/81618/126433/51146/79947/64689/63917/252…
MF	GO:0044390	ubiquitin-like protein conjugating enzyme binding	31	0.544222	1.96405	0.000681197	0.0236098	0.0204994	3169	tags=35%, list=13%, signal=31%	10915/7189/123879/25897/25820/54941/84259/285671/23142/154214/6477
BP	GO:0051170	import into nucleus	145	0.331769	1.62519	0.000684226	0.0236103	0.0204998	2723	tags=24%, list=11%, signal=22%	80149/9221/9972/1026/6774/10527/3838/51307/79711/1432/129401/29107/1871/10762/5901/4928/602/51569/3842/9531/4792/60468/55027/26953/729857/4000/23633/6789/51366/84220/10526/7545/7175/9883/1386
BP	GO:0010273	detoxification of copper ion	13	0.710311	1.99957	0.000700653	0.0236561	0.0205396	4086	tags=62%, list=16%, signal=52%	4489/4499/4493/4501/4502/4490/4496/4495
BP	GO:1990169	stress response to copper ion	13	0.710311	1.99957	0.000700653	0.0236561	0.0205396	4086	tags=62%, list=16%, signal=52%	4489/4499/4493/4501/4502/4490/4496/4495
BP	GO:2000765	regulation of cytoplasmic translation	24	0.584317	1.98485	0.000698291	0.0236561	0.0205396	3654	tags=50%, list=15%, signal=43%	80315/10605/3184/170506/1660/10492/7555/22849/3192/7812/10642/221662
BP	GO:0006953	acute-phase response	47	0.480825	1.93184	0.000692192	0.0236561	0.0205396	4119	tags=34%, list=16%, signal=29%	5359/3570/1051/2335/259249/6291/3553/2157/1401/57817/3552/5733/12/3569/7124/9332
CC	GO:0030670	phagocytic vesicle membrane	73	-0.417823	-1.79765	0.000696441	0.0236561	0.0205396	5513	tags=48%, list=22%, signal=38%	155066/567/6890/57192/8992/80223/1536/23682/7096/11151/5880/51209/306/83871/10312/6892/4218/3135/3107/10981/1535/3916/3106/55198/84329/8673/3105/533/1785/811/9140/9114/3136/3134/9341
BP	GO:0009072	aromatic amino acid family metabolic process	28	0.562497	1.98833	0.000707643	0.0237896	0.0206554	7726	tags=75%, list=31%, signal=52%	8564/84105/6999/8942/5053/1638/84842/389434/7166/130013/51078/6898/23498/3081/143941/2184/2954/121278/5860/7299/2639
BP	GO:0006760	folic acid-containing compound metabolic process	26	0.571018	1.98508	0.000714634	0.0238201	0.020682	4931	tags=54%, list=20%, signal=43%	2643/441024/4552/2618/81034/10588/10841/2346/60496/10840/6470/6573/8836/2356
BP	GO:0090049	regulation of cell migration involved in sprouting angiogenesis	36	0.514252	1.94788	0.000712111	0.0238201	0.020682	2506	tags=33%, list=10%, signal=30%	90627/9314/7101/3162/7422/55294/5286/7057/10014/2247/54567/10769
BP	GO:0006006	glucose metabolic process	173	0.314648	1.58977	0.000721757	0.0239556	0.0207996	3992	tags=27%, list=16%, signal=23%	8864/4609/55276/1407/10499/90007/7262/1432/467/5771/2542/6095/10447/5562/57486/2641/10580/5162/4886/34/468/5164/10891/1642/25948/4837/4041/6652/2308/23516/2203/83440/85414/3795/79660/9563/3607/5208/3099/26330/3481/8660/2646/7124/3170/10165/54729
BP	GO:0031663	lipopolysaccharide-mediated signaling pathway	58	0.412568	1.72328	0.00073004	0.0240438	0.0208762	3584	tags=34%, list=14%, signal=30%	3656/10221/5594/7189/1432/6348/1604/4792/23328/7097/148022/8767/8915/3553/6347/7099/10892/4846/654/7124
BP	GO:0006417	regulation of translation	326	0.265106	1.44946	0.000730554	0.0240438	0.0208762	3786	tags=23%, list=15%, signal=20%	80149/8864/9221/2935/80315/7538/1654/6198/6059/23645/6197/10605/25983/54517/9689/3184/170506/602/1983/201626/246175/1660/10492/23404/1802/468/678/22894/9444/1965/54915/4691/1617/23034/2107/84919/9669/22916/285381/22868/28960/55239/25929/7555/7057/8846/6093/23369/27327/87178/8570/60558/57055/51010/7175/8662/79048/22849/3192/84541/28969/219988/2309/10600/7812/10209/51247/10642/3569/7124/221662/9085…
BP	GO:0016556	mRNA modification	18	0.631367	1.99087	0.000734313	0.0240664	0.0208958	3098	tags=50%, list=12%, signal=44%	9589/80324/54517/54888/1736/3182/51605/142940/10930
BP	GO:0014896	muscle hypertrophy	77	0.396008	1.74361	0.000742692	0.0242396	0.0210462	5411	tags=42%, list=22%, signal=33%	3572/10611/5062/142/4205/7132/2626/5756/493/8557/3720/4000/488/23493/6093/57817/2308/54206/11214/148/817/2146/4088/221476/4625/7222/7133/5997/183/1025/22876/3952
CC	GO:0098791	Golgi apparatus subcompartment	320	-0.283592	-1.49792	0.000754055	0.0245084	0.0212795	4417	tags=26%, list=18%, signal=22%	1212/170384/9600/23682/6484/6293/5879/4074/5872/5587/23621/54760/3125/6616/8218/143187/55790/122618/9528/56927/972/124583/2523/51552/9179/51272/286451/162/3996/63941/51172/2525/83871/10893/54432/6272/10139/2528/4218/11313/10053/10066/3119/79895/3115/10164/11070/55512/10981/2524/25999/55204/79065/25825/3105/57198/2896/29911/23423/11285/23057/6844/9482/10959/55111/1211/55062/10133/55968/79586/51107…
BP	GO:0006120	mitochondrial electron transport, NADH to ubiquinone	39	-0.510587	-1.8942	0.000772778	0.0248081	0.0215398	4679	tags=41%, list=19%, signal=33%	4708/65018/4710/4722/4705/4714/4726/4709/57017/23479/4725/4713/4701/4704/4728/4696
MF	GO:0005518	collagen binding	62	-0.437412	-1.80775	0.000767234	0.0248081	0.0215398	5452	tags=45%, list=22%, signal=35%	4092/4015/10491/5155/1513/22801/50509/114897/7373/9902/7450/165/4060/1634/84168/285613/6678/8515/3673/1291/3675/780/127435/871/131578/1292/5058/147372
BP	GO:1905114	cell surface receptor signaling pathway involved in cell-cell signaling	487	-0.253913	-1.39772	0.000772593	0.0248081	0.0215398	5365	tags=29%, list=21%, signal=23%	55593/2263/1742/4693/10076/65268/3684/2719/9839/1000/92162/1749/54475/9037/6206/23043/9775/59352/387/8724/4286/64359/27122/8898/7480/55612/6424/5879/7484/8820/5728/8796/6659/115908/7482/6597/1601/4920/5999/57154/2625/55897/1906/409/5499/4776/84870/25806/57326/8607/3728/5310/3065/55737/84100/80114/3670/55716/1952/284654/2869/90780/8325/2904/63923/51176/9968/51738/134/2931/85407/9679/1277/2239/8321…
CC	GO:0005793	endoplasmic reticulum-Golgi intermediate compartment	108	-0.36708	-1.68395	0.000783	0.0250336	0.0217356	2829	tags=25%, list=11%, signal=22%	65258/81562/11018/537/6836/6892/51006/64689/4925/23423/10130/10945/10959/128637/8842/871/84317/126003/811/54732/4043/90522/5034/353376/4245/51614/10134
BP	GO:0034504	protein localization to nucleus	259	0.282198	1.5033	0.000810039	0.025529	0.0221657	2824	tags=21%, list=11%, signal=19%	80149/9221/9972/1026/6774/23212/10527/3838/51307/79711/1432/129401/142/29107/1871/10762/5901/4928/602/51569/3842/9531/5905/4792/705/1736/129685/163590/55027/4771/7486/9113/26953/729857/3985/54984/114882/4000/23633/6789/51366/1855/25942/84220/10526/7545/2752/27348/22948/7175/9883/1386/3192/51804/51574
CC	GO:0005770	late endosome	241	-0.292998	-1.49893	0.000805408	0.025529	0.0221657	4326	tags=27%, list=17%, signal=23%	124997/84557/23646/55823/4074/3109/23621/85377/3125/3108/27243/8218/143187/79643/129531/9528/3140/112936/26276/972/6441/51552/55737/146894/684/51150/23327/7405/51209/2904/54432/10312/5660/10058/92421/88455/3592/7251/3916/51160/653145/8673/79065/9476/2896/55315/10791/23057/9482/79443/9399/23245/84315/5595/51009/3643/5119/23400/23555/1201/29082/9896/353376/5605/252839
BP	GO:0006914	autophagy	460	-0.256036	-1.40823	0.00081153	0.025529	0.0221657	4940	tags=29%, list=20%, signal=24%	1612/91445/64601/83734/65991/57192/6720/11331/8992/65018/23241/10206/1513/528/114881/117854/11152/124997/84557/55823/7248/54828/5587/836/79142/8396/23265/83933/54874/128077/27243/57154/143187/79643/1611/2021/9528/112936/55255/51506/1915/5049/10548/665/10287/8832/115201/55737/83667/9179/171024/7157/55486/84219/7405/79735/2597/89849/1634/58533/2931/529/54543/7345/10312/5768/9110/5660/10919/92421/55…
BP	GO:0061919	process utilizing autophagic mechanism	460	-0.256036	-1.40823	0.00081153	0.025529	0.0221657	4940	tags=29%, list=20%, signal=24%	1612/91445/64601/83734/65991/57192/6720/11331/8992/65018/23241/10206/1513/528/114881/117854/11152/124997/84557/55823/7248/54828/5587/836/79142/8396/23265/83933/54874/128077/27243/57154/143187/79643/1611/2021/9528/112936/55255/51506/1915/5049/10548/665/10287/8832/115201/55737/83667/9179/171024/7157/55486/84219/7405/79735/2597/89849/1634/58533/2931/529/54543/7345/10312/5768/9110/5660/10919/92421/55…
MF	GO:0008238	exopeptidase activity	91	-0.396996	-1.76887	0.000818622	0.0256491	0.02227	5420	tags=40%, list=22%, signal=31%	130749/1075/1512/59342/290/1522/54878/57140/56265/10072/4323/93979/29952/1800/22846/64174/5547/91039/131870/59272/4324/1200/79956/23549/79805/9805/29953/6051/1359/119587/2191/60509/10004/5476/8532/4048
BP	GO:0043649	dicarboxylic acid catabolic process	18	0.628557	1.98201	0.000831571	0.025951	0.0225321	4619	tags=61%, list=18%, signal=50%	10588/2747/2752/60496/443/10840/2805/2806/2746/197322/23475
BP	GO:0097501	stress response to metal ion	17	0.653884	2.01013	0.000836107	0.0259785	0.022556	1194	tags=41%, list=5%, signal=39%	7779/4489/4499/4493/4501/4502/4490
CC	GO:0030137	COPI-coated vesicle	20	-0.610428	-1.92714	0.000846417	0.0259785	0.022556	2939	tags=45%, list=12%, signal=40%	55690/11015/11014/23423/11316/10945/10959/84317/22818
BP	GO:0009267	cellular response to starvation	132	0.339523	1.64663	0.000849037	0.0259785	0.022556	3426	tags=25%, list=14%, signal=22%	80149/80315/54407/1026/81929/7378/5594/3625/4780/467/81631/7071/5562/10634/8493/7486/468/4217/23032/1965/4149/96459/7494/9463/2308/27327/2752/220441/1386/213/2309/51422/53632
BP	GO:0006606	protein import into nucleus	141	0.333819	1.6382	0.0008441	0.0259785	0.022556	2723	tags=24%, list=11%, signal=22%	80149/9221/9972/1026/6774/10527/3838/51307/79711/1432/129401/29107/1871/10762/5901/4928/602/51569/3842/9531/4792/55027/26953/729857/4000/23633/6789/51366/84220/10526/7545/7175/9883/1386
BP	GO:0006403	RNA localization	162	0.322028	1.6197	0.000842036	0.0259785	0.022556	3720	tags=27%, list=15%, signal=23%	9972/7538/81929/11260/25909/55308/65083/9984/129401/170506/29107/57510/10762/5901/84248/4928/9908/11269/54888/1736/1660/23144/23279/9444/3182/22916/59343/23299/7884/87178/8570/55677/9804/22948/7175/9883/9877/3192/23511/55795/10642/677/92345/57122
CC	GO:0030663	COPI-coated vesicle membrane	16	-0.679377	-1.98741	0.000854193	0.0260346	0.0226047	1928	tags=44%, list=8%, signal=40%	11015/11014/23423/11316/10945/10959/22818
CC	GO:0008305	integrin complex	31	-0.543535	-1.91052	0.000858469	0.0260635	0.0226298	5969	tags=52%, list=24%, signal=39%	10077/3676/3694/3684/3680/3693/22801/3683/3655/3695/8515/3673/3675/11117/3682/3691
MF	GO:0051861	glycolipid binding	28	-0.55561	-1.91611	0.000868819	0.0261748	0.0227265	3956	tags=54%, list=16%, signal=45%	4099/1800/65258/8733/54982/1200/5660/7070/65078/25999/6403/54209/128869/284217/1201
BP	GO:0070849	response to epidermal growth factor	41	0.491988	1.90949	0.000866682	0.0261748	0.0227265	2915	tags=39%, list=12%, signal=35%	4609/7538/5594/3397/5076/678/4691/1956/2066/6591/5781/54206/5151/7175/7429/6777
BP	GO:0031396	regulation of protein ubiquitination	186	0.300189	1.53881	0.000886004	0.0265903	0.0230872	3731	tags=27%, list=15%, signal=24%	8864/10253/26271/57162/1407/1654/23560/7189/29979/123879/54602/9529/57561/11170/54552/10625/84259/23328/7337/329/22976/80762/55294/148022/8767/3301/54984/8915/2729/285671/59343/57761/8555/9112/51366/64127/8312/23142/378884/91947/7336/10892/254170/25898/151636/8945/112401/27338/7332/330/5582
CC	GO:0005583	fibrillar collagen trimer	12	-0.72908	-1.95832	0.000909878	0.0269965	0.0234399	5811	tags=75%, list=23%, signal=58%	85301/1290/1307/50509/4060/1277/1289/1281/1278
CC	GO:0098643	banded collagen fibril	12	-0.72908	-1.95832	0.000909878	0.0269965	0.0234399	5811	tags=75%, list=23%, signal=58%	85301/1290/1307/50509/4060/1277/1289/1281/1278
BP	GO:0062012	regulation of small molecule metabolic process	288	0.275232	1.4762	0.000908734	0.0269965	0.0234399	4614	tags=28%, list=18%, signal=24%	3949/4609/1407/133/6774/1958/10499/90007/7262/142/5771/160760/6095/10447/5562/57486/2641/10580/493/83752/34/2330/9572/55022/5164/10891/4790/1642/3091/6647/4837/3553/57761/5447/5629/634/58526/6591/2695/2053/2308/51360/2203/338/6770/2693/51141/5027/85414/3795/4846/79660/9563/3607/5208/51422/654/130013/3565/79849/26330/3481/8660/2646/7124/335/3170/6615/5978/9626/54729/9611/283120/157506/10196/3356/1…
BP	GO:0009066	aspartate family amino acid metabolic process	42	0.498704	1.93721	0.000927501	0.0272924	0.0236968	4957	tags=48%, list=20%, signal=38%	441024/4552/4507/468/51166/157739/5352/60496/26227/80150/443/2805/2806/10165/4143/89874/10157/4482/51074/27232
BP	GO:0001570	vasculogenesis	74	0.393414	1.72272	0.000927847	0.0272924	0.0236968	3719	tags=30%, list=15%, signal=25%	1969/25976/133/3726/3037/22976/7422/7049/57493/55294/6910/51666/9444/4643/83605/634/23493/4915/64321/2013/677/10052
CC	GO:0005635	nuclear envelope	396	0.258145	1.44571	0.000930304	0.0272924	0.0236968	2898	tags=20%, list=12%, signal=18%	9972/64783/23223/7779/81929/2643/9218/23560/11260/3708/25909/3601/9589/3930/10527/667/203228/81565/55183/22926/129401/142/29107/663/10762/5901/4928/3204/169714/23224/5905/11269/6386/55151/163590/10434/11342/55326/23279/729857/9722/1956/5621/79982/22929/1104/23200/114882/80314/285671/59343/4000/27067/23299/9112/64328/23592/6683/84220/10526/23369/590/23439/5733/83990/166336/113878/27348/3482/1773/7…
MF	GO:0031624	ubiquitin conjugating enzyme binding	25	0.581168	2.00231	0.000953672	0.0278736	0.0242014	3169	tags=40%, list=13%, signal=35%	7189/123879/25897/25820/54941/84259/285671/23142/154214/6477
BP	GO:0061008	hepaticobiliary system development	130	0.335171	1.62003	0.000962362	0.028023	0.0243311	4931	tags=35%, list=20%, signal=29%	4609/3725/1051/3184/23242/3162/9076/7049/34/3720/1054/55294/5970/1361/7494/5629/634/4853/5774/51733/57817/383/87178/3482/84159/1386/3158/1543/3280/64321/55036/89780/3569/7124/5253/2146/3172/1373/7471/11113/4088/23322/6648/27031/8854/2356
BP	GO:0001889	liver development	127	0.339524	1.63295	0.000977461	0.0282109	0.0244943	4931	tags=35%, list=20%, signal=29%	4609/3725/1051/3184/23242/3162/9076/7049/34/3720/1054/55294/5970/1361/7494/5629/634/4853/5774/51733/57817/383/87178/3482/84159/1386/3158/1543/3280/55036/89780/3569/7124/5253/2146/3172/1373/7471/11113/4088/23322/6648/27031/8854/2356
BP	GO:0031669	cellular response to nutrient levels	183	0.317756	1.62249	0.000975017	0.0282109	0.0244943	3218	tags=23%, list=13%, signal=20%	80149/80315/54407/1026/5292/81929/7378/5594/3625/4780/467/11170/81631/6722/7071/5562/3162/10634/8493/7486/468/4217/23032/5164/1965/4149/96459/7494/9463/28960/6591/2308/27327/2752/83990/90226/220441/1386/213/7421/2309/51422
CC	GO:0034774	secretory granule lumen	300	-0.276626	-1.45206	0.000979621	0.0282109	0.0244943	5673	tags=33%, list=23%, signal=26%	3082/2934/10855/201294/114790/567/4831/1075/6727/7077/1512/83706/5155/5211/5707/10092/1522/10916/10577/4282/6317/1476/5713/23406/1938/6278/1727/6037/6286/29952/3326/2162/2919/1915/10450/5049/8804/6709/2547/124583/7042/226/4057/3728/7114/7450/5702/2665/51411/6282/79980/3934/7424/5443/4353/51738/175/10487/5768/2821/5645/6678/1893/2950/9535/3074/3615/2444/1511/2896/84514/2720/5777/5036/353/1460/6590…
MF	GO:0050136	NADH dehydrogenase (quinone) activity	33	-0.527118	-1.88383	0.000986438	0.0282366	0.0245166	4679	tags=52%, list=19%, signal=42%	4702/4731/4708/4710/4722/4705/4714/4726/4709/1728/4725/4713/4701/4704/51079/4728/4696
BP	GO:0061512	protein localization to cilium	61	-0.427881	-1.75966	0.000987721	0.0282366	0.0245166	6469	tags=49%, list=26%, signal=37%	199223/7287/7289/56623/7275/22873/51364/55704/2622/51382/57545/285331/79867/84314/9696/79989/23265/9742/84100/2665/79600/585/4218/9727/582/27241/403/84455/199221/55812
BP	GO:0008154	actin polymerization or depolymerization	169	-0.318908	-1.55379	0.00100926	0.0287473	0.02496	5728	tags=36%, list=23%, signal=28%	10006/7408/2934/1627/90952/1072/6366/85462/9087/79822/6369/9037/832/10092/10093/387/119/64780/57580/23406/5879/8195/51474/6387/64857/5217/9051/2006/345456/6709/10095/55761/7114/11151/89848/51738/585/11078/148170/10152/8440/199/3071/8936/9353/23580/50853/2314/9168/80115/10344/5216/10109/28988/54961/10552/11344/118/29108/274/79778
BP	GO:0030031	cell projection assembly	413	-0.264197	-1.43718	0.00101456	0.0287936	0.0250002	6248	tags=35%, list=25%, signal=27%	1769/168448/644890/22873/6363/29070/200162/9459/26160/4983/25809/5116/79734/51364/117177/150483/55704/2934/2014/2622/3784/80321/51382/8481/57545/3636/6366/285331/27152/85462/51256/10198/832/80173/23043/89846/79867/51626/10309/3175/3265/84314/51225/54970/53827/26005/55835/64518/79874/4070/5879/56171/27148/54828/9696/79989/8382/1012/8195/85478/79738/54874/79574/10451/5217/375790/57096/1639/64787/97…
BP	GO:0034440	lipid oxidation	105	0.364135	1.69749	0.00103429	0.0290379	0.0252124	7766	tags=52%, list=31%, signal=36%	51/1432/5562/83752/239/34/247/10891/5264/5194/1892/39/5447/1666/2110/3033/6342/5825/549/51422/1962/54363/8660/55268/51179/10478/84129/127/128/3712/3295/30/37/285440/3952/7941/3032/5191/32/8309/33/5467/2109/54677/208/8013/9370/23600/1384/2168/38/84649/242/2639/8647
BP	GO:0030833	regulation of actin filament polymerization	117	-0.359115	-1.65926	0.00103201	0.0290379	0.0252124	5704	tags=38%, list=23%, signal=30%	7408/2934/1627/90952/6366/9087/79822/6369/832/10092/10093/387/119/23406/8195/64857/5217/2006/345456/6709/10095/7114/11151/89848/585/11078/148170/8440/3071/9353/23580/50853/2314/9168/80115/10344/5216/10109/28988/54961/10552/11344/118/29108/274
BP	GO:0031400	negative regulation of protein modification process	436	0.243202	1.37444	0.0010329	0.0290379	0.0252124	2272	tags=17%, list=9%, signal=15%	80149/1848/8864/10253/26271/5515/10221/200734/1407/11213/3725/1026/80824/10114/23560/5770/5062/23645/801/123879/10527/10129/135112/122809/203228/9021/5787/91663/54880/11076/9529/5771/54552/9043/81848/4616/10625/5562/493/23603/1399/1849/57493/3720/4771/9113/55022/3301/1786/5621/5970/5788/84919/54984/4041/2729/261726/59343/3553/57761/10019/51366/1855/25942/634/1032/25998/6093/26146/83891/9467/54206
BP	GO:0032602	chemokine production	87	0.372645	1.68956	0.00104512	0.0291333	0.0252952	2614	tags=29%, list=10%, signal=26%	1969/3566/1654/1958/9314/3570/2867/9173/3162/7097/148022/247/4210/8767/3091/64581/3553/84868/245937/6591/6868/7099/64127/90865/727
MF	GO:0001228	DNA-binding transcription activator activity, RNA polymerase II-specific	433	0.251675	1.4184	0.00104383	0.0291333	0.0252952	3795	tags=23%, list=15%, signal=20%	4609/2034/3725/3727/6774/23764/1958/5359/2494/9314/5990/4780/7101/467/22926/7027/1316/1051/3726/1871/6722/4205/3204/2353/3131/7071/2354/2626/9889/6239/8538/1052/55922/2355/1054/1761/5015/468/6910/26205/4772/4790/3091/1959/3226/1997/5970/3659/29841/84699/2969/3516/7572/6496/6018/353274/3198/404281/54897/3196/2308/7545/2551/7594/5994/1649/256297/25850/1386/51804/5459/8061/22887/7716/6938/6777/5458/…
BP	GO:0006892	post-Golgi vesicle-mediated transport	92	-0.380576	-1.70073	0.00105408	0.0292788	0.0254215	3038	tags=30%, list=12%, signal=27%	51552/7805/583/9179/3996/114879/83871/6272/10139/55770/10066/582/55614/3916/55204/29091/403/10791/288/6844/160/55062/10133/1785/9341/10067/1201/8906
BP	GO:0032481	positive regulation of type I interferon production	54	0.437924	1.79804	0.00106342	0.0294338	0.0255561	2164	tags=30%, list=9%, signal=27%	89870/1654/8780/1147/170506/10146/1660/3329/7097/148022/56919/8767/3659/11128/7099/5781
CC	GO:0098798	mitochondrial protein-containing complex	210	-0.300476	-1.50581	0.00107269	0.0295859	0.0256882	5923	tags=34%, list=24%, signal=26%	1537/4731/64981/7384/65003/10245/7381/10573/84419/56993/1347/29074/11331/10989/1349/65005/4708/11232/116540/64965/4710/51116/64979/4722/126328/740/79135/83943/4705/26519/128308/64978/7386/4714/7388/4726/5160/84701/64976/26517/4709/1340/1346/55168/64975/54539/28973/54543/581/10651/56901/64963/4725/51373/51264/4713/1351/124995/84303/4701/4704/25813/51079/122704/23107/54460/4728/51258/4696/3421/84545
BP	GO:0071241	cellular response to inorganic substance	202	0.300044	1.55103	0.00109498	0.0300947	0.0261299	3342	tags=25%, list=13%, signal=22%	3725/3727/5594/1147/144402/3625/4780/3726/142/3184/127550/4489/4499/4205/4493/2353/4501/2354/5562/284111/3162/9076/4502/1017/4490/468/6647/1965/1956/5621/3981/1585/1544/91683/1393/2308/9362/2203/1398/6857/341359/546/148281/1543/414301/673/817/654/6263/131034
BP	GO:0000422	autophagy of mitochondrion	74	-0.402323	-1.7362	0.00113377	0.0309436	0.026867	5350	tags=42%, list=21%, signal=33%	10193/51024/10645/65991/6720/11331/65018/1513/11152/84557/665/7157/55486/2931/54543/1459/9706/84971/493856/706/79065/7249/139341/27429/132671/26100/55062/10133/9140/23400/2629
BP	GO:0061726	mitochondrion disassembly	74	-0.402323	-1.7362	0.00113377	0.0309436	0.026867	5350	tags=42%, list=21%, signal=33%	10193/51024/10645/65991/6720/11331/65018/1513/11152/84557/665/7157/55486/2931/54543/1459/9706/84971/493856/706/79065/7249/139341/27429/132671/26100/55062/10133/9140/23400/2629
CC	GO:0071007	U2-type catalytic step 2 spliceosome	28	-0.548891	-1.89293	0.00115014	0.0312815	0.0271604	4649	tags=46%, list=18%, signal=38%	6627/1659/10450/10286/51503/27339/8896/56949/6635/25949/6633/6637/9343
BP	GO:0034249	negative regulation of cellular amide metabolic process	165	0.309145	1.55886	0.00116009	0.0314429	0.0273005	4041	tags=27%, list=16%, signal=23%	80149/80315/7538/1654/10605/54517/3184/170506/5562/201626/246175/1660/10492/23404/468/678/22894/1965/54915/4691/5621/23034/28960/6093/27327/87178/8570/51010/4915/7175/6653/22849/3192/219988/9001/7812/51247/10642/1191/221662/677/54464/6470/255967/55802
BP	GO:0097193	intrinsic apoptotic signaling pathway	259	0.278346	1.48278	0.00116622	0.0315	0.0273501	2097	tags=19%, list=8%, signal=17%	4170/4609/1969/1026/1654/5770/3708/23645/29979/81537/8876/837/4780/9529/1051/142/5771/8795/5329/10625/602/7132/1655/7159/8065/3162/4976/4824/6279/83787/55294/468/4217/8454/5164/6280/3091/3301/6647/8575/6421/7494/2956/57761/90441/1032/6591/10059
BP	GO:0035751	regulation of lysosomal lumen pH	15	-0.645091	-1.8684	0.00121617	0.0327363	0.0284235	2336	tags=67%, list=9%, signal=61%	54664/5538/65082/54982/1203/2896/84317/10159/1201/252839
BP	GO:0140467	integrated stress response signaling	22	0.589141	1.95	0.00123534	0.0331285	0.0287641	2459	tags=36%, list=10%, signal=33%	5770/23645/4780/5771/468/1965/84919/1649
BP	GO:0010573	vascular endothelial growth factor production	34	0.508299	1.8767	0.0012392	0.0331285	0.0287641	3584	tags=41%, list=14%, signal=35%	3572/3570/6095/728/2626/468/3091/3553/3552/727/718/361/3569/7124
CC	GO:0060205	cytoplasmic vesicle lumen	303	-0.276105	-1.45396	0.00126634	0.033739	0.0292941	5673	tags=33%, list=23%, signal=26%	3082/2934/10855/201294/114790/567/4831/1075/6727/7077/1512/83706/5155/5211/5707/10092/1522/10916/10577/4282/6317/1476/5713/23406/1938/6278/1727/6037/6286/29952/23621/3326/2162/2919/1915/10450/5049/8804/6709/2547/124583/7042/226/4057/3728/7114/7450/5702/2665/51411/6282/79980/3934/7424/5443/4353/51738/175/10487/5768/2821/5645/6678/1893/2950/9535/3074/3615/2444/1511/2896/84514/2720/5777/5036/353/146…
CC	GO:0098636	protein complex involved in cell adhesion	43	-0.475378	-1.81832	0.00131091	0.0346904	0.0301202	6273	tags=56%, list=25%, signal=42%	1493/5328/83700/10077/3676/3694/3956/3684/3680/58494/3693/22801/3957/63923/3683/3655/3695/8515/3673/940/3675/11117/3682/3691
CC	GO:0035578	azurophil granule lumen	81	-0.385814	-1.68768	0.00131088	0.0346904	0.0301202	5529	tags=41%, list=22%, signal=32%	81567/2519/2588/201294/114790/1075/5707/10577/6317/6278/1727/6037/29952/8804/2665/79980/4353/175/10487/5645/3074/2444/1511/2896/2720/5036/4125/2760/58485/10493/5476/5834/29108
CC	GO:0005743	mitochondrial inner membrane	371	-0.265229	-1.42401	0.00132988	0.035074	0.0304532	5294	tags=30%, list=21%, signal=24%	2537/30968/1159/150209/10573/84419/1355/2232/1347/29074/93058/11331/11194/8402/10989/1349/65005/4708/65018/54977/5018/8760/6834/116540/64965/65008/112724/4710/92170/51116/118487/113612/64979/1267/8834/8604/4722/126328/740/57048/79135/83943/2021/79085/1353/4705/26519/3283/55349/25875/128308/64978/7386/4358/4714/3958/7388/4726/548596/84701/1584/64976/26517/4709/1340/1346/55486/55168/64975/1583/6188…
BP	GO:0018196	peptidyl-asparagine modification	20	-0.600366	-1.89537	0.00134922	0.0354647	0.0307924	1207	tags=40%, list=5%, signal=38%	1650/3703/1603/7991/55662/2530/256281/4245
BP	GO:0006397	mRNA processing	348	0.258904	1.43038	0.0013682	0.0358431	0.031121	4276	tags=26%, list=17%, signal=22%	79753/64783/10915/5725/51202/6651/10150/9589/23076/6732/51319/9984/7536/170506/4928/9879/1859/1655/201626/27254/6294/60493/246175/1660/10492/23524/23144/23451/1665/11193/55339/54957/10179/3183/10891/9444/10285/56903/4691/9588/55692/55544/55192/22916/6421/28960/10250/25929/80746/10978/51585/23210/7884/22803/87178/8570/55015/79882/10656/284695/55677/3185/58517/22849/3192/51574/23283/55234/81608/298…
BP	GO:0060271	cilium assembly	242	-0.295355	-1.50847	0.00138428	0.0361435	0.0313818	6760	tags=41%, list=27%, signal=31%	11127/55212/161514/83544/4750/25930/138639/164714/1769/168448/644890/22873/29070/200162/26160/25809/5116/79734/51364/117177/150483/55704/2934/2622/3784/80321/51382/8481/57545/285331/27152/85462/51256/10198/80173/79867/51626/10309/3175/84314/54970/26005/55835/64518/79874/56171/27148/9696/79989/8382/8195/85478/79738/54874/57096/1639/9742/64446/9371/583/84100/2665/1952/79140/347240/7419/353116/79600…
BP	GO:0030099	myeloid cell differentiation	335	0.256975	1.41035	0.00143696	0.0373945	0.032468	4864	tags=27%, list=19%, signal=22%	4609/1969/64783/10221/7538/91/2034/3725/1230/6774/7189/3930/6729/604/1432/6348/1051/3726/142/5771/7066/6722/3204/2353/7071/3394/9948/55646/4792/5814/55509/7422/7049/80762/22904/1054/3593/55294/7097/8737/3091/1441/51266/814/3516/7130/10019/3398/634/10935/4853/7099/11025/3313/5781/23210/8772/2551/23054/8861/5048/10107/865/28962/6777/5458/2309/3565/2150/29766/7124/861/677/211/64806/87/284266/4495/14…
BP	GO:0022411	cellular component disassembly	394	-0.26557	-1.43806	0.00146895	0.0381002	0.0330808	5019	tags=30%, list=20%, signal=24%	10645/10211/64601/9037/9617/832/7153/65991/57192/6720/11331/6314/81930/65018/1513/119/64780/11152/2264/84557/9793/6749/81858/4323/79142/1659/9622/6597/51474/11132/128077/27243/26586/79643/2021/219402/4320/51506/5499/1639/6709/665/57326/6603/6624/10904/2258/712/6604/26993/4319/1524/5578/7157/55486/59341/347240/9349/10300/7405/1676/2931/6605/54543/11078/4324/327/581/4316/5645/92421/9181/6601/1459/9…
BP	GO:0001736	establishment of planar polarity	68	-0.400321	-1.69314	0.00148918	0.0383708	0.0333157	4634	tags=40%, list=18%, signal=32%	387/84446/5879/7484/115908/1601/4920/57154/84870/2295/1952/9968/85407/2239/8321/8323/7976/54903/5754/57216/7474/4919/23245/128272/144165/2535/1856
BP	GO:0007164	establishment of tissue polarity	68	-0.400321	-1.69314	0.00148918	0.0383708	0.0333157	4634	tags=40%, list=18%, signal=32%	387/84446/5879/7484/115908/1601/4920/57154/84870/2295/1952/9968/85407/2239/8321/8323/7976/54903/5754/57216/7474/4919/23245/128272/144165/2535/1856
CC	GO:0030532	small nuclear ribonucleoprotein complex	58	-0.423205	-1.73119	0.0015113	0.0388132	0.0336998	4886	tags=38%, list=19%, signal=31%	125050/6627/51690/27258/8175/153527/6638/10421/57819/23658/26121/6635/10465/6633/83443/10992/6637/6626/9343/51634/10569/10713
BP	GO:0006111	regulation of gluconeogenesis	38	0.482395	1.84959	0.00151795	0.0388566	0.0337375	2395	tags=32%, list=10%, signal=29%	1407/5771/10447/57486/2641/34/5164/10891/1642/4837/2308/2203
MF	GO:0035615	clathrin adaptor activity	18	-0.610635	-1.85304	0.00153947	0.039279	0.0341043	4235	tags=50%, list=17%, signal=42%	1175/11037/1601/163/10053/160/26119/8906/1173
MF	GO:0005520	insulin-like growth factor binding	23	-0.564696	-1.85449	0.00156998	0.0399274	0.0346673	2935	tags=35%, list=12%, signal=31%	3490/3655/5654/3691/3486/3489/3643/81621
BP	GO:2000232	regulation of rRNA processing	11	0.730982	1.95125	0.00157636	0.0399599	0.0346955	1279	tags=55%, list=5%, signal=52%	23160/83732/57602/84128/55781/84135
MF	GO:0048407	platelet-derived growth factor binding	11	-0.724521	-1.89865	0.00158877	0.0400157	0.0347439	5430	tags=82%, list=22%, signal=64%	5156/5155/5159/1282/1277/1289/1291/1281/1278
CC	GO:0035770	ribonucleoprotein granule	221	0.289877	1.51666	0.00158502	0.0400157	0.0347439	5507	tags=32%, list=22%, signal=25%	80149/57532/7538/1654/64332/55308/6780/203228/53339/170506/6461/9908/11269/1992/10146/54888/60493/1660/8994/1965/54915/4691/23034/3981/3182/27067/22868/28960/55239/6093/23369/27327/23644/8651/64848/27097/3192/219988/2690/7073/6607/7812/79752/2926/10642/677/54464/55794/255967/55802/29760/253943/339345/1981/5683/4163/2312/10482/8444/5701/1025/8761/2332/26995/113251/200315/221400/9575/79072/127933/1…
BP	GO:1990440	positive regulation of transcription from RNA polymerase II promoter in response to endoplasmic reticulum stress	10	0.749475	1.93752	0.00159907	0.040146	0.034857	2459	tags=70%, list=10%, signal=63%	467/22926/1051/468/84699/51360/1649
CC	GO:0031301	integral component of organelle membrane	297	-0.280292	-1.47126	0.00161347	0.040378	0.0350585	5476	tags=31%, list=22%, signal=25%	199953/567/10245/6252/26608/6786/51024/6890/55333/10237/11153/9900/57171/4242/65991/1717/10989/65018/5018/7108/51283/23471/142891/79993/8834/79135/54760/3125/55624/55790/1353/94005/113829/8879/972/1798/114569/91319/51272/662/8733/54898/10170/5768/10651/10058/64834/6892/89941/57414/9409/54344/3119/3115/3135/3107/54499/29927/3106/57143/80775/3105/84303/10791/158866/139341/5025/27235/28972/8799/1286…
CC	GO:1904813	ficolin-1-rich granule lumen	120	-0.346266	-1.60579	0.001624	0.0405121	0.0351749	5666	tags=38%, list=23%, signal=29%	51806/2934/51646/4831/6727/7077/1512/5211/10092/1522/4282/1476/5713/23406/1938/11333/3326/1915/10450/5049/2547/124583/226/3728/5702/51411/327/2821/2950/9535/3615/2720/1460/823/28988/5686/1471/1509/9961/5708/79169/10120/29099/23412/4048
BP	GO:0009068	aspartate family amino acid catabolic process	16	0.63915	1.93613	0.00166604	0.0414288	0.0359708	4122	tags=56%, list=16%, signal=47%	51166/157739/80150/443/2805/2806/4143/89874/10157
BP	GO:0042773	ATP synthesis coupled electron transport	64	-0.428073	-1.78554	0.00168136	0.041546	0.0360726	6059	tags=41%, list=24%, signal=31%	4702/1537/4731/7381/1355/51142/4708/65018/4710/4722/4705/7386/4714/7388/4726/84701/4709/1346/57017/23479/4725/4713/4701/4704/4728/4696
BP	GO:0042775	mitochondrial ATP synthesis coupled electron transport	64	-0.428073	-1.78554	0.00168136	0.041546	0.0360726	6059	tags=41%, list=24%, signal=31%	4702/1537/4731/7381/1355/51142/4708/65018/4710/4722/4705/7386/4714/7388/4726/84701/4709/1346/57017/23479/4725/4713/4701/4704/4728/4696
BP	GO:0017148	negative regulation of translation	143	0.321458	1.58086	0.00169819	0.0418301	0.0363192	4369	tags=29%, list=17%, signal=24%	80149/80315/7538/1654/10605/54517/3184/170506/201626/246175/1660/10492/23404/468/678/22894/1965/54915/4691/23034/28960/6093/27327/87178/8570/51010/7175/22849/3192/219988/7812/51247/10642/221662/677/54464/6470/255967/55802/253943/339345
BP	GO:0016236	macroautophagy	265	-0.282165	-1.44873	0.00170732	0.0419229	0.0363999	4922	tags=31%, list=20%, signal=25%	64601/83734/57192/11331/8992/65018/23241/10206/528/11152/124997/84557/7248/836/79142/8396/23265/83933/128077/27243/57154/143187/79643/112936/51506/5049/665/55737/83667/9179/171024/7157/7405/2597/89849/1634/58533/529/54543/7345/10312/5768/10919/92421/27244/9706/84971/57674/11178/7251/26249/51160/8673/79065/55613/56893/7249/79837/27429/79443/823/26471/26100/5595/55062/533/10133/84313/55968/51368/55…
BP	GO:0072330	monocarboxylic acid biosynthetic process	192	0.292902	1.50704	0.00174033	0.0426001	0.0369878	5771	tags=35%, list=23%, signal=27%	8864/50640/114883/2628/5562/239/8564/247/9572/9444/81616/1544/3990/1559/7494/3553/57761/5629/634/58526/123876/2695/1576/6342/64577/5313/6770/51141/6718/5825/79071/8560/54988/85414/1543/149998/51302/51422/130013/53632/84696/348158/1558/335/6296/157506/84869/197322/10196/3948/1066/5007/10613/9388/114880/171586/56624/8854/51085/37/1582/11160/2593/653308/47/32/341
BP	GO:0031124	mRNA 3'-end processing	51	0.450817	1.83913	0.0017545	0.0428131	0.0371727	6011	tags=53%, list=24%, signal=40%	170506/23144/55339/56903/22916/10978/51585/7884/87178/79882/22849/23283/81608/25888/2926/11051/677/904/351/10898/1025/54623/29894/91746/10914/53981/3297
BP	GO:0006596	polyamine biosynthetic process	12	0.709103	1.9576	0.00177352	0.0430091	0.037343	2728	tags=58%, list=11%, signal=52%	262/51582/4837/4953/6303/79814/4946
CC	GO:0030688	preribosome, small subunit precursor	11	0.728217	1.94387	0.00176977	0.0430091	0.037343	806	tags=55%, list=3%, signal=53%	83732/8780/84946/23076/55781/705
BP	GO:0019882	antigen processing and presentation	99	-0.361193	-1.63127	0.0018005	0.0435287	0.0377941	5713	tags=38%, list=23%, signal=30%	5865/913/567/6366/6890/1512/8546/910/3109/10437/3125/3108/3140/972/3111/115827/83871/6892/30835/3119/3115/3135/3107/10981/3106/3105/5720/5869/1510/54209/1785/1509/811/3136/3134/29108/5696/2629
BP	GO:0098780	response to mitochondrial depolarisation	15	-0.631529	-1.82912	0.001829	0.0440817	0.0382742	2363	tags=40%, list=9%, signal=36%	65018/54543/27429/10133/2874/2629
BP	GO:0051770	positive regulation of nitric-oxide synthase biosynthetic process	17	0.636859	1.95779	0.00185946	0.0446783	0.0387922	2312	tags=47%, list=9%, signal=43%	5606/10135/9590/7097/6347/7099/64127/90865
BP	GO:0031532	actin cytoskeleton reorganization	99	-0.358419	-1.61875	0.00186538	0.0446836	0.0387968	5653	tags=34%, list=22%, signal=27%	2934/90952/5156/396/26037/397/23043/3265/387/51225/2252/55561/10411/54828/11132/9723/10278/6464/59341/1436/84168/8477/3815/9535/5754/5911/4192/80115/29085/1020/29780/5058/85360/79778
CC	GO:0097525	spliceosomal snRNP complex	49	-0.459697	-1.80666	0.00187993	0.0447685	0.0388705	4649	tags=41%, list=18%, signal=33%	6627/51690/27258/8175/153527/6638/10421/57819/23658/26121/6635/10465/6633/83443/10992/6637/6626/9343/51634/10713
BP	GO:0006405	RNA export from nucleus	68	0.392387	1.71029	0.00188036	0.0447685	0.0388705	3255	tags=29%, list=13%, signal=26%	9972/11260/55308/65083/9984/29107/57510/5901/84248/11269/54888/1660/23279/22916/55677/7175/9883/9877/23511/55795
BP	GO:0036065	fucosylation	15	-0.629762	-1.824	0.00189737	0.0450367	0.0391034	4346	tags=53%, list=17%, signal=44%	170384/2523/2525/2528/51006/2524/23275/2530
CC	GO:0030660	Golgi-associated vesicle membrane	46	-0.465309	-1.80311	0.00190679	0.0451236	0.0391789	5406	tags=41%, list=21%, signal=32%	54503/9182/1314/1212/8218/6572/5310/4900/11015/11014/23423/11316/10945/10959/1211/160/1080/22818/8906
BP	GO:0006607	NLS-bearing protein import into nucleus	15	0.636926	1.86542	0.00193063	0.04555	0.0395491	7244	tags=80%, list=29%, signal=57%	3838/129401/729857/23633/84220/400966/3839/868/3840/5903/53371/3836
BP	GO:0000082	G1/S transition of mitotic cell cycle	179	0.295297	1.50348	0.00194648	0.045786	0.039754	4749	tags=28%, list=19%, signal=23%	7465/4609/2935/5515/91/5932/1026/1654/6198/123879/1876/9314/2273/7027/11170/1871/8065/1017/9113/990/8454/1956/5426/1104/59343/902/3398/1032/6347/9510/6868/23476/10769/23026/1543/1874/57695/9134/571/2146/815/8453/9928/5962/5591/1981/835/11319/51322/1018/1869
BP	GO:1902373	negative regulation of mRNA catabolic process	53	0.430283	1.75893	0.00196013	0.0459691	0.039913	5205	tags=45%, list=21%, signal=36%	7538/10605/1432/3184/1660/10492/3183/1617/3182/57055/79048/3192/9261/9704/7812/10642/221662/7432/1869/90806/29974/2332/6556/10758
BP	GO:0016241	regulation of macroautophagy	146	-0.319258	-1.53594	0.00198321	0.0463716	0.0402624	4770	tags=32%, list=19%, signal=26%	8992/65018/10206/528/11152/7248/836/79142/8396/23265/112936/5049/665/55737/83667/7157/7405/2597/1634/58533/529/7345/5768/10919/27244/11178/55613/56893/7249/79837/79443/823/26471/5595/55062/533/10133/55072/9140/9114/826/23400/1020/1201/29082/90423/2629
BP	GO:0032259	methylation	255	0.274326	1.45967	0.00200768	0.046804	0.0406379	2978	tags=20%, list=12%, signal=18%	4609/2935/64783/84193/60487/9589/4552/54880/55183/1387/4234/142/387338/2353/5929/2641/54888/8493/22976/10782/3720/200424/4837/64216/1786/4800/10785/2107/51742/1544/9836/221078/4000/23067/127253/9463/6018/51605/5409/25840/27136/23476/54815/63978/55677/80204/546/51574/9545/2145/1543
CC	GO:0005839	proteasome core complex	19	-0.593187	-1.84387	0.00206796	0.0480662	0.0417338	2261	tags=37%, list=9%, signal=34%	5699/5698/5692/5693/5686/5690/5696
BP	GO:0002495	antigen processing and presentation of peptide antigen via MHC class II	29	-0.527272	-1.83294	0.00208258	0.0481205	0.0417809	3980	tags=45%, list=16%, signal=38%	3109/10437/3125/3108/972/3111/3119/3115/1510/54209/1785/1509/29108
BP	GO:0035967	cellular response to topologically incorrect protein	99	0.347025	1.60572	0.00208076	0.0481205	0.0417809	2459	tags=24%, list=10%, signal=22%	5770/23645/80311/4780/467/22926/55768/55658/5771/9531/55432/3329/468/55284/1965/51182/79982/84919/84699/7494/3313/84899/51360/1649
BP	GO:0001738	morphogenesis of a polarized epithelium	87	-0.370715	-1.64423	0.00209319	0.0482234	0.0418703	4634	tags=34%, list=18%, signal=28%	387/84446/5879/3909/7484/115908/1601/4920/57154/84870/2295/1952/9968/85407/2239/8321/8323/7976/54903/5754/57216/9368/7474/4919/23245/128272/284217/144165/2535/1856
BP	GO:0003299	muscle hypertrophy in response to stress	21	0.569547	1.86132	0.00212299	0.0484823	0.042095	6170	tags=67%, list=25%, signal=50%	493/8557/4000/488/23493/2308/54206/2146/4088/4625/7222/22876/5468/23125
BP	GO:0014887	cardiac muscle adaptation	21	0.569547	1.86132	0.00212299	0.0484823	0.042095	6170	tags=67%, list=25%, signal=50%	493/8557/4000/488/23493/2308/54206/2146/4088/4625/7222/22876/5468/23125
BP	GO:0014898	cardiac muscle hypertrophy in response to stress	21	0.569547	1.86132	0.00212299	0.0484823	0.042095	6170	tags=67%, list=25%, signal=50%	493/8557/4000/488/23493/2308/54206/2146/4088/4625/7222/22876/5468/23125
BP	GO:0043154	negative regulation of cysteine-type endopeptidase activity involved in apoptotic process	71	0.386859	1.68801	0.00214701	0.0487465	0.0423244	3660	tags=34%, list=15%, signal=29%	5272/1654/5062/117584/6197/9314/5329/5076/329/7422/8740/1457/96459/5447/7057/1032/10935/80196/23204/7429/4671/112401/7124/330
BP	GO:0030258	lipid modification	190	0.298923	1.53957	0.0021445	0.0487465	0.0423244	6379	tags=40%, list=25%, signal=30%	81537/51/1432/185/127550/5562/83752/239/66036/34/247/10891/5264/5194/1892/54545/2583/39/5447/1666/8708/2110/1576/2053/3033/6342/5825/1543/4534/549/284541/51422/1962/54363/8867/8660/55268/51179/10478/8776/1558/335/3931/84129/9107/22908/127/128/3712/3633/3295/9108/30/37/183/8897/22876/8877/285440/64781/3952/7941/3032/5191/32/341/336/8526/8309/33/28/5467/1577/2109/54677/10903
BP	GO:0034655	nucleobase-containing compound catabolic process	341	0.258764	1.42236	0.00217325	0.0491995	0.0427178	5217	tags=31%, list=21%, signal=25%	80149/2935/7538/7378/10605/23405/1432/3184/170506/1655/201626/54888/27254/1736/60493/956/1763/246175/6832/1660/10492/23404/10179/678/22894/3183/3251/54915/1617/23034/2107/3182/22916/57089/22868/1806/28960/6996/22882/6093/51733/22978/23369/22803/10924/27327/26135/87178/8570/23644/60528/79882/5142/57055/51010/1807/5151/1773/51154/79048/22849/27443/3192/10846/124245/7356/1776/9261/9704/10930/219988/…
BP	GO:0043032	positive regulation of macrophage activation	24	0.556336	1.8898	0.00221202	0.049591	0.0430577	2312	tags=42%, list=9%, signal=38%	3566/3727/6348/9173/3329/7057/84868/7099/57817/90865
MF	GO:0003955	NAD(P)H dehydrogenase (quinone) activity	35	-0.506064	-1.82522	0.00220505	0.049591	0.0430577	6059	tags=51%, list=24%, signal=39%	4702/4835/4731/4708/4710/4722/4705/4714/4726/4709/1728/4725/4713/4701/4704/51079/4728/4696
CC	GO:0046540	U4/U6 x U5 tri-snRNP complex	29	-0.52415	-1.82209	0.00221586	0.049591	0.0430577	4513	tags=45%, list=18%, signal=37%	51690/27258/153527/6638/57819/23658/26121/6635/10465/6633/6637/9343/10713
CC	GO:0097526	spliceosomal tri-snRNP complex	29	-0.52415	-1.82209	0.00221586	0.049591	0.0430577	4513	tags=45%, list=18%, signal=37%	51690/27258/153527/6638/57819/23658/26121/6635/10465/6633/6637/9343/10713
CC	GO:0034358	plasma lipoprotein particle	34	0.49145	1.81449	0.00224766	0.049875	0.0433043	5777	tags=53%, list=23%, signal=41%	3949/1071/6291/3990/338/4481/4018/5444/350/1191/3069/335/3931/319/55937/7941/341/336
CC	GO:1990777	lipoprotein particle	34	0.49145	1.81449	0.00224766	0.049875	0.0433043	5777	tags=53%, list=23%, signal=41%	3949/1071/6291/3990/338/4481/4018/5444/350/1191/3069/335/3931/319/55937/7941/341/336
MF	GO:0004532	exoribonuclease activity	34	0.491343	1.8141	0.00224766	0.049875	0.0433043	3944	tags=38%, list=16%, signal=32%	80149/201626/246175/23404/22894/25996/28960/22803/87178/81875/51010/54464/255967
