# Supplementary material for: Exploring key biomarkers of liver fibrosis progression to hepatocellular carcinoma based on immune cell-related genes
Source: Research Square preprint supplement (doi:10.21203/rs.3.rs-6479983/v1), 2025-05-21
Supplement: Supplementary file 2 [file 1d2f7bf3b3dae2f3e958ab47.xlsx]

## Sheet: LYVE1.GOgsea
ONTOLOGY	ID	Description	setSize	enrichmentScore	NES	pvalue	p.adjust	qvalue	rank	leading_edge	core_enrichment
BP	GO:0016054	organic acid catabolic process	218	0.610918	3.22295	1e-10	1.18682e-08	8.80861e-09	5158	tags=62%, list=21%, signal=50%	6999/8942/83752/3295/10478/7915/36/64087/5053/84696/9663/57834/594/18/35/8564/34/84129/2110/1592/4051/51166/5825/443/4552/64577/38/2875/5194/64902/51/11112/1892/3081/2752/4329/5860/5446/5444/5264/9673/2954/4143/27034/58510/2639/10588/875/23475/10841/54363/32/2746/51540/3155/5465/55268/6470/55556/2806/593/30/27349/125061/39/3030/1381/8659/6342/26275/10157/10840/3033/10449/55862/3028/23464/1757/157…
CC	GO:0022626	cytosolic ribosome	97	-0.706506	-3.19046	1e-10	1.18682e-08	8.80861e-09	4206	tags=68%, list=17%, signal=57%	6166/3040/51065/6201/6135/6137/6231/6138/6173/6168/11224/6133/6224/6130/6160/6203/6146/6171/6124/6235/6142/6141/25873/6189/3921/6208/6191/9636/6209/6233/6218/6143/347/6217/6232/6170/6181/6132/6230/6152/6222/6175/6207/6204/6136/6193/6144/6206/6156/6210/6227/116832/6154/6223/6194/6188/6187/4736/6169/6205/6139/6157/51538/8705/23521/6165
BP	GO:0046395	carboxylic acid catabolic process	215	0.607633	3.1874	1e-10	1.18682e-08	8.80861e-09	5158	tags=62%, list=21%, signal=50%	6999/8942/83752/3295/10478/7915/36/64087/5053/84696/9663/57834/594/18/35/8564/34/84129/2110/1592/4051/51166/5825/443/4552/64577/38/2875/5194/64902/51/11112/1892/3081/2752/4329/5860/5446/5444/5264/9673/2954/4143/27034/58510/2639/10588/875/23475/10841/54363/32/2746/3155/5465/55268/6470/55556/2806/593/30/27349/125061/39/3030/1381/8659/6342/26275/10157/10840/3033/10449/55862/3028/23464/1757/1579/383/…
BP	GO:0072329	monocarboxylic acid catabolic process	112	0.654656	3.11462	1e-10	1.18682e-08	8.80861e-09	5153	tags=65%, list=20%, signal=52%	83752/3295/10478/84696/9663/57834/35/34/84129/2110/1592/4051/5825/38/5194/64902/51/1892/5446/5264/2639/54363/32/5465/55268/30/27349/39/3030/1381/6342/3033/10449/55862/3028/1579/33/84693/6718/26063/5105/80724/26061/2109/23600/1666/23175/5095/2166/2184/54677/11001/189/5830/8309/37/10994/1384/6822/1891/2108/11057/208/171586/3032/197257/340665/1374/23417/5826/66002/5106/1962
BP	GO:0009062	fatty acid catabolic process	92	0.657305	3.01899	1e-10	1.18682e-08	8.80861e-09	5366	tags=65%, list=21%, signal=51%	83752/3295/10478/84696/9663/35/34/84129/2110/5825/38/5194/51/1892/5264/2639/54363/32/5465/55268/30/27349/39/3030/6342/3033/10449/55862/3028/33/84693/26063/5105/80724/26061/2109/23600/1666/23175/5095/2166/54677/11001/5830/8309/37/10994/1384/1891/2108/11057/208/171586/3032/1374/23417/5826/5106/1962/8647
BP	GO:0009063	cellular amino acid catabolic process	100	0.630604	2.95014	1e-10	1.18682e-08	8.80861e-09	4076	tags=59%, list=16%, signal=50%	6999/8942/7915/36/64087/5053/594/18/8564/51166/443/4552/64577/38/2875/64902/11112/1892/3081/2752/4329/5860/9673/2954/4143/27034/58510/875/10841/2746/3155/6470/55556/2806/593/125061/8659/26275/10157/3028/23464/1757/383/2109/275/1036/144193/1629/6472/2184/23498/23576/189/51380/2731/3176/130013/2108/3034
BP	GO:0006635	fatty acid beta-oxidation	69	0.660447	2.90021	1e-10	1.18682e-08	8.80861e-09	5366	tags=65%, list=21%, signal=51%	83752/3295/10478/35/34/84129/2110/5825/38/51/1892/2639/32/5465/55268/30/27349/39/3030/6342/3033/10449/55862/3028/33/26063/80724/2109/23600/1666/54677/11001/5830/8309/37/1384/1891/2108/208/3032/1374/23417/5826/1962/8647
BP	GO:0006520	cellular amino acid metabolic process	232	0.548155	2.89544	1e-10	1.18682e-08	8.80861e-09	4722	tags=53%, list=19%, signal=43%	6999/3172/8942/2729/7915/36/64087/55256/5053/143941/441024/594/18/8564/4522/57176/51166/84105/443/4552/64577/389434/124454/79731/1806/38/2875/64902/11112/1892/132949/3081/2752/55157/4329/5860/2618/9673/2954/4143/27034/58510/2639/10588/22928/875/10165/10841/5471/2746/51540/3155/570/6470/55556/2806/593/125061/1373/8659/26275/1644/1719/10157/29968/5198/5805/26227/79814/57505/3028/4507/256987/23464/6…
CC	GO:0022627	cytosolic small ribosomal subunit	40	-0.759564	-2.85159	1e-10	1.18682e-08	8.80861e-09	4016	tags=78%, list=16%, signal=65%	3040/51065/6201/6231/6224/6203/6235/6189/3921/6208/6191/9636/6209/6233/6218/6217/6232/6230/6222/6207/6204/6193/6206/6210/6227/6223/6194/6188/6187/6205/8705
BP	GO:0019395	fatty acid oxidation	99	0.603361	2.82034	1e-10	1.18682e-08	8.80861e-09	5153	tags=60%, list=20%, signal=48%	83752/3295/10478/51422/35/34/84129/1432/2110/5562/5825/38/5194/51/1892/5264/2639/84649/54363/32/5465/55268/30/27349/39/3030/10891/6342/3033/10449/55862/3028/33/26063/80724/128/51179/26061/2109/23600/1666/5447/54677/11001/1591/5830/8309/37/10994/1384/1891/2108/127/208/3032/1374/23417/5826/1962
BP	GO:1901605	alpha-amino acid metabolic process	174	0.543342	2.78239	1e-10	1.18682e-08	8.80861e-09	4599	tags=52%, list=18%, signal=43%	6999/3172/8942/2729/7915/36/64087/55256/5053/143941/441024/8564/4522/51166/84105/443/4552/64577/389434/38/2875/64902/11112/3081/2752/4329/5860/2618/2954/4143/27034/58510/2639/10588/22928/875/10165/10841/5471/2746/51540/3155/570/6470/2806/125061/1373/8659/26275/1719/10157/29968/5198/26227/79814/3028/4507/256987/23464/5092/1638/1757/383/4357/435/275/92292/7263/1036/468/144193/5352/6472/2184/23498/2…
BP	GO:1901606	alpha-amino acid catabolic process	83	0.607606	2.76298	1e-10	1.18682e-08	8.80861e-09	3734	tags=54%, list=15%, signal=46%	6999/8942/36/64087/5053/8564/51166/443/4552/64577/38/2875/64902/11112/3081/2752/4329/5860/2954/4143/27034/58510/875/2746/51540/3155/6470/2806/125061/8659/26275/10157/3028/23464/1757/383/275/1036/6472/2184/23498/23576/189/51380/2731
MF	GO:0005201	extracellular matrix structural constituent	159	-0.569995	-2.75174	1e-10	1.18682e-08	8.80861e-09	3192	tags=44%, list=13%, signal=39%	25878/2006/1305/1462/4237/1300/3339/115908/255743/64129/85301/10394/3909/3918/131368/255631/27286/5549/1299/8483/284217/1286/1303/2192/4146/1285/1290/7058/1277/1282/1291/10516/3915/7450/1289/2202/10418/1298/2199/1307/1281/1284/84034/4060/1805/3912/11117/1296/633/1278/3490/80144/1293/4240/2331/8425/7373/25890/375790/30008/4256/4239/8406/1306/1634/127435/165/1292/3908/6678
CC	GO:0022625	cytosolic large ribosomal subunit	56	-0.675422	-2.74036	1e-10	1.18682e-08	8.80861e-09	3627	tags=64%, list=14%, signal=55%	6147/6155/6166/6135/6137/6138/6173/6168/11224/6133/6130/6160/6146/6171/6124/6142/6141/25873/6143/6170/6181/6132/6152/6175/6136/6144/6156/116832/6154/4736/6169/6139/6157/51538/23521/6165
CC	GO:0005759	mitochondrial matrix	403	0.482359	2.72669	1e-10	1.18682e-08	8.80861e-09	4728	tags=45%, list=19%, signal=37%	29958/116447/7915/36/64087/9093/2271/10587/64969/5888/6296/7156/1763/441024/594/64216/18/85476/80324/501/35/3329/34/6832/26995/51022/9801/5164/2110/2395/51166/3336/124454/79731/38/6059/64902/11112/51253/1892/6647/4191/201626/4720/92399/54516/55157/60528/4329/4719/2066/2936/2954/54148/51218/27034/2639/83875/10105/51021/10588/84340/131118/55526/87178/10845/80224/54802/2230/2746/10102/55217/80347/80…
BP	GO:0034440	lipid oxidation	105	0.577219	2.70443	1e-10	1.18682e-08	8.80861e-09	5153	tags=57%, list=20%, signal=46%	83752/3295/10478/51422/35/34/84129/1432/2110/5562/5825/38/5194/51/1892/5264/2639/84649/54363/32/5465/55268/30/27349/39/3030/10891/6342/3033/10449/55862/3028/33/26063/80724/128/51179/26061/2109/23600/1666/5447/54677/11001/1591/5830/8309/37/10994/1384/1891/2108/247/127/208/3032/1374/23417/5826/1962
BP	GO:0044282	small molecule catabolic process	343	0.484108	2.6943	1e-10	1.18682e-08	8.80861e-09	5158	tags=52%, list=21%, signal=42%	6999/8942/83752/3295/10478/7915/36/4041/64087/5053/84696/9663/57834/594/18/35/8564/2584/34/84129/2110/1592/4051/51166/5825/443/4552/64577/1806/38/2875/5194/64902/51/11112/1892/3081/2752/4329/5860/6652/5446/5444/5264/3612/9673/2954/4143/27034/58510/2639/10588/875/23475/10841/54363/32/2746/51540/3155/5465/55268/6470/55556/2806/593/6799/2582/51302/30/27349/125061/39/3030/1381/8659/6342/26275/217/101…
BP	GO:0043648	dicarboxylic acid metabolic process	87	0.561155	2.57275	1e-10	1.18682e-08	8.80861e-09	4076	tags=49%, list=16%, signal=42%	8942/2729/7915/8513/2271/441024/8564/4522/51166/443/4552/4191/2752/5264/58510/6573/10588/23475/10841/2746/6470/113235/2806/6390/8659/1719/10840/92259/3418/5105/55753/8803/144193/6472/23498/6389/4967/79944/56954/471/197322/130013/3034
BP	GO:0002181	cytoplasmic translation	130	-0.542876	-2.56465	1e-10	1.18682e-08	8.80861e-09	3778	tags=51%, list=15%, signal=43%	6201/6135/6137/6231/7458/6138/56339/6173/6168/11224/6133/6224/6130/57409/6160/6203/6146/6171/6124/6235/6142/6141/25873/5936/6189/3921/6208/6191/6209/1974/6233/6218/6143/6217/6232/6170/6181/6132/6230/6152/6222/6175/6207/6204/6136/6193/6144/6206/6156/6210/6227/6154/1968/6223/6194/6188/6187/4736/6169/6205/51389/6139/8664/6157/23521/6165
MF	GO:0003735	structural constituent of ribosome	155	-0.510571	-2.47033	1e-10	1.18682e-08	8.80861e-09	3778	tags=42%, list=15%, signal=36%	6201/6135/6137/6231/122704/6138/6173/6168/219927/11224/6133/6224/6130/6160/6203/6146/6171/6124/6235/6142/6141/25873/51373/6189/3921/6208/6191/9636/6209/6233/6218/6143/6217/6232/54460/6170/6181/6132/6230/6152/6222/6175/6207/6204/124995/6136/6193/6144/6206/6156/6210/6227/116832/6154/6223/6194/6188/6187/4736/6169/6205/6139/6157/23521/6165
BP	GO:0050851	antigen receptor-mediated signaling pathway	152	-0.507695	-2.44943	1e-10	1.18682e-08	8.80861e-09	3822	tags=47%, list=15%, signal=40%	25/931/3125/975/974/11119/3265/8767/3119/11120/952/10666/3071/3932/100/919/50852/11118/89857/55024/4067/79908/695/11314/3958/9404/10616/7462/55072/23149/121665/7805/25865/930/29085/26191/84433/5293/79679/5583/581/2874/10657/6850/54900/84174/79037/3543/596/57181/1493/3105/5335/940/5144/23228/4208/7070/925/6188/4068/3635/123920/973/3115/3702/7535/5777/27242/784/1236
CC	GO:0044391	ribosomal subunit	168	-0.494294	-2.40897	1e-10	1.18682e-08	8.80861e-09	4016	tags=41%, list=16%, signal=35%	3040/51065/6201/6135/6137/6231/122704/6138/6173/6168/219927/11224/6133/6224/6130/6160/6203/6146/6171/6124/6235/6142/6141/25873/51373/6189/3921/6208/6191/9636/6209/6233/6218/6143/6217/6232/54460/6170/6181/6132/6230/6152/6222/6175/6207/6204/124995/6136/6193/6144/6206/6156/6210/6227/116832/6154/6223/6194/6188/6187/4736/6169/6205/6139/6157/51538/8705/23521/6165
CC	GO:0045335	phagocytic vesicle	130	-0.507415	-2.39712	1e-10	1.18682e-08	8.80861e-09	5057	tags=52%, list=20%, signal=41%	4353/51715/219972/25921/55198/10981/9367/4057/3135/8724/4689/101/6891/533/7791/6814/653361/3693/122618/23682/567/4688/51762/6504/71/6810/54106/8992/7405/11031/3133/6812/3685/2934/8766/80223/84329/3916/311/10312/4641/8678/10392/6892/7454/6850/252983/51209/8673/6890/3136/3105/306/1535/5322/51284/23208/7431/338382/11151/3106/23580/83871/5880/3134/81622/9341
CC	GO:0005925	focal adhesion	389	-0.44401	-2.3914	1e-10	1.18682e-08	8.80861e-09	5259	tags=46%, list=21%, signal=37%	89/10211/8573/6278/5898/5788/7529/85458/23396/1264/3936/9124/5754/89782/858/6730/10092/2318/2697/10174/6155/8412/859/3674/6645/9902/9019/60/60312/975/6503/7791/2314/10097/50507/8516/5747/7739/4739/22800/6201/3315/64098/3693/4810/4026/3678/5500/3728/567/6168/4921/3676/28964/6133/4478/8826/5786/3339/1265/9260/4627/6130/3611/7534/51474/9493/6160/71/387/1601/1266/3655/6203/6146/6124/6235/823/4267/867…
BP	GO:0002685	regulation of leukocyte migration	195	-0.481479	-2.38768	1e-10	1.18682e-08	8.80861e-09	4312	tags=44%, list=17%, signal=36%	1524/5734/81704/101/975/5025/5747/6369/399/4254/79148/7423/6793/6688/58494/6484/3676/6376/1907/3071/6403/4478/3592/729230/653/6504/2621/683/6347/100/387/57402/134/2841/51157/5228/4267/2526/4067/1906/1436/11314/3958/79890/8764/29108/8784/5764/56833/347/9466/5879/961/1235/6387/199/3627/54209/3673/6352/56477/23075/11035/4681/7070/11117/83700/63940/5595/301/3965/10164/7424/9353/27347/5880/80310/972/6…
CC	GO:0030055	cell-substrate junction	397	-0.441281	-2.38161	1e-10	1.18682e-08	8.80861e-09	5259	tags=46%, list=21%, signal=37%	89/10211/8573/6278/5898/5788/7529/85458/23396/1264/3936/9124/5754/89782/858/6730/10092/2318/2697/10174/6155/8412/859/3674/6645/9902/9019/60/60312/975/6503/7791/2314/10097/50507/10518/8516/5747/7739/4739/22800/6201/3315/64098/3693/4810/4026/3678/5500/3728/567/6168/4921/3676/28964/6133/4478/8826/5786/3339/1265/9260/4627/6130/3611/7534/51474/9493/6160/71/387/1601/1266/3655/6203/6146/6124/6235/823/42…
BP	GO:0030258	lipid modification	190	0.454998	2.357	1e-10	1.18682e-08	8.80861e-09	5366	tags=47%, list=21%, signal=38%	83752/22908/3295/10478/51422/35/34/84129/1432/2110/5562/5825/38/5194/51/1892/8776/5264/3931/81537/2639/84649/54363/32/5465/55268/54893/30/27349/39/116519/3030/10891/6342/3033/10449/55862/1543/3028/54545/284541/33/1607/26063/80724/139189/128/4534/51179/1576/26061/2109/1558/23600/1666/9107/9162/5447/185/54677/183/11001/1591/5830/8309/37/10994/1384/1891/4952/6483/2108/247/127/1577/335/8867/8435/208/…
BP	GO:0042110	T cell activation	467	-0.421989	-2.30675	1e-10	1.18682e-08	8.80861e-09	5037	tags=41%, list=20%, signal=34%	2207/59067/10538/57829/924/3936/8600/3118/6541/11005/3135/3117/23598/4818/7157/2697/7292/8324/25/57864/384/5734/3821/911/81704/84695/3662/101/2629/3125/975/970/55423/3559/5971/3120/80758/2737/11119/860/399/8320/3446/8767/100507436/8546/3119/8325/6688/56339/567/2281/4277/8654/3683/1650/6441/26022/3071/1178/3932/4478/3592/729230/114548/942/57580/4627/3594/6504/6347/944/100/387/6146/5914/3140/2841/1…
CC	GO:0062023	collagen-containing extracellular matrix	400	-0.426229	-2.30071	1e-10	1.18682e-08	8.80861e-09	3059	tags=31%, list=12%, signal=28%	2006/1305/1178/1462/4237/1300/3339/115908/9068/255743/712/64129/85301/1511/10394/3909/2263/3918/308/9510/255631/27286/23213/3958/5549/311/1299/8483/284217/1075/307/2162/1286/3898/284018/1303/2192/4146/713/151887/1509/1690/5269/1285/302/1290/7058/7076/9509/977/284/1277/1282/1291/10516/3915/7450/7042/1289/6387/2202/8404/7077/10418/6281/64094/1298/2199/1307/3960/3959/653145/1281/1284/1359/2719/84034…
BP	GO:1903039	positive regulation of leukocyte cell-cell adhesion	232	-0.445137	-2.26165	1e-10	1.18682e-08	8.80861e-09	4801	tags=42%, list=19%, signal=34%	8600/3118/6541/3135/3117/5724/7292/81704/101/3125/975/970/55423/3559/3120/2737/399/8767/8546/3119/567/6484/3676/3071/3932/6403/3592/729230/114548/942/3594/6504/6347/100/387/5914/3133/2526/4067/959/3707/57178/8764/10125/23149/2113/3689/29108/864/1949/26191/6714/84433/916/79679/6850/9466/54440/961/2736/857/3600/6659/199/29851/3105/3112/6352/940/3113/939/7070/3122/6188/3109/923/3108/11151/3115/301/3…
BP	GO:0050870	positive regulation of T cell activation	212	-0.447579	-2.24116	1e-10	1.18682e-08	8.80861e-09	4801	tags=42%, list=19%, signal=34%	8600/3118/6541/3135/3117/7292/81704/101/3125/975/970/55423/3559/3120/2737/399/8767/8546/3119/567/3071/3932/3592/729230/114548/942/3594/6504/6347/100/387/5914/3133/4067/959/3707/57178/8764/10125/23149/29108/864/1949/26191/6714/84433/916/79679/6850/9466/54440/961/2736/857/3600/6659/199/29851/3105/3112/6352/940/3113/939/7070/3122/6188/3109/923/3108/11151/3115/301/3965/921/4602/7535/5777/100133941/97…
BP	GO:0006631	fatty acid metabolic process	351	0.400997	2.23364	1e-10	1.18682e-08	8.80861e-09	5040	tags=40%, list=20%, signal=33%	83752/57406/3295/10478/50640/51703/36/51422/84696/9663/57834/6296/35/51099/2180/34/255189/84129/5164/1432/2110/4051/5562/552/5825/38/5194/51/948/1892/132949/5264/1544/91452/158584/2639/1573/8864/3990/9388/84649/54363/32/2169/9611/5465/570/55268/11160/10613/53632/551/1557/30/1562/27349/39/116519/3030/10891/6342/718/3033/1066/84869/10998/10449/55862/1543/10965/3028/51085/284541/2693/54995/1579/5498…
BP	GO:0030335	positive regulation of cell migration	465	-0.406778	-2.2265	1e-10	1.18682e-08	8.80861e-09	4598	tags=38%, list=18%, signal=32%	10016/5724/1545/9037/6789/9723/25/57381/5354/2241/56034/81029/1524/81704/101/7869/3640/4318/56920/5025/10500/5747/4739/6369/22800/284403/2041/3315/1512/5031/4254/3265/2549/7423/3678/2048/4150/1839/6688/58494/1613/4921/3676/6376/1907/10630/3071/6403/3592/729230/22954/3488/2254/5154/6776/6504/2621/71/958/387/6810/1601/3655/57402/3082/51157/5228/4267/8877/147372/2821/2526/3685/3918/150/4067/59/5058/…
BP	GO:0051251	positive regulation of lymphocyte activation	278	-0.429696	-2.22148	1e-10	1.18682e-08	8.80861e-09	4801	tags=40%, list=19%, signal=33%	8600/3118/6541/3135/3117/51293/7292/3596/81704/101/3125/975/970/55423/3559/4292/3120/2737/399/8767/8546/3119/2048/567/7158/952/3071/3932/3592/729230/114548/942/3594/6504/2621/683/6347/100/958/387/5914/54106/4352/3133/4067/9760/959/695/3707/3916/57178/8764/10125/23149/29108/864/1949/26191/6714/84433/7305/916/79679/6850/9466/54440/3543/961/596/2736/57181/857/3600/6659/199/29851/7293/3105/3112/30011…
BP	GO:0050900	leukocyte migration	345	-0.416045	-2.20504	1e-10	1.18682e-08	8.80861e-09	4497	tags=39%, list=18%, signal=32%	6361/6357/2241/6374/1524/5734/81704/101/2629/4318/975/5025/5747/6369/399/6367/4254/79148/7423/6793/643/6688/58494/1621/6484/3676/3683/6376/1907/6441/3071/6362/3932/3680/6403/4478/3592/729230/6373/57580/653/4627/6504/2621/683/6347/100/387/3655/57402/134/2841/51157/5228/4267/1511/2526/4067/1906/1436/11314/3958/2919/79890/3603/8764/3675/3689/255231/29108/3695/8784/6714/5764/56833/5293/347/4920/6850/…
BP	GO:0070661	leukocyte proliferation	308	-0.420155	-2.20118	1e-10	1.18682e-08	8.80861e-09	4801	tags=40%, list=19%, signal=33%	8600/6541/7128/3135/7157/2697/51293/3070/7292/25/384/931/3596/81704/4064/2629/975/970/3559/5747/684/11119/4254/3446/8767/2048/2281/8654/952/6376/6441/3071/1178/4478/3592/729230/942/3594/6504/683/944/100/958/4883/54106/1438/4352/3133/4067/1794/959/1436/695/3445/11314/3958/8764/10125/10312/57045/930/29108/26191/84433/5532/23385/10457/652/7305/5585/916/79679/581/977/6850/5580/9466/54440/5699/596/571…
BP	GO:0002768	immune response-regulating cell surface receptor signaling pathway	229	-0.432666	-2.1951	1e-10	1.18682e-08	8.80861e-09	4410	tags=44%, list=18%, signal=36%	7409/115352/53347/696/5788/2207/2219/55198/5142/10384/3135/25/2241/931/3821/3125/975/5747/974/11119/5284/3265/8767/3119/11120/2359/4277/952/10666/3071/3932/100/958/919/50852/11118/89857/55024/4067/79908/5058/4214/695/11314/3958/9404/10616/7462/55072/23149/121665/7805/2206/25865/930/29085/26191/6714/84433/5293/7305/79679/5583/581/2874/10657/6850/54900/5580/84174/79037/3543/961/596/64005/57181/1493…
BP	GO:0050863	regulation of T cell activation	315	-0.415647	-2.18317	1e-10	1.18682e-08	8.80861e-09	4801	tags=39%, list=19%, signal=32%	8600/3118/6541/11005/3135/3117/7292/25/57864/384/81704/84695/3662/101/3125/975/970/55423/3559/3120/2737/399/8767/8546/3119/56339/567/8654/6441/3071/1178/3932/3592/729230/114548/942/3594/6504/6347/944/100/387/5914/1511/3133/4067/9760/959/55824/11314/3707/3958/57178/8764/27040/10125/57045/23149/639/7805/29108/864/1949/26191/6714/84433/10457/652/916/79679/6850/54900/9466/54440/961/2736/857/3600/2571…
BP	GO:0046651	lymphocyte proliferation	277	-0.422246	-2.1775	1e-10	1.18682e-08	8.80861e-09	4587	tags=39%, list=18%, signal=32%	7157/2697/51293/3070/7292/25/384/931/3596/81704/4064/975/970/3559/11119/3446/8767/2048/2281/8654/952/6441/3071/1178/4478/3592/729230/942/3594/6504/683/944/100/958/54106/4352/3133/4067/1794/959/695/3445/11314/3958/8764/10125/57045/930/29108/26191/84433/5532/23385/10457/652/7305/5585/916/79679/581/977/6850/5580/9466/54440/5699/596/57181/3600/199/2064/2000/7293/1493/3105/6352/940/11035/3113/23228/42…
BP	GO:0051272	positive regulation of cellular component movement	495	-0.3965	-2.1764	1e-10	1.18682e-08	8.80861e-09	4598	tags=37%, list=18%, signal=31%	10016/5724/1545/9037/6789/9723/25/57381/5354/2241/56034/81029/1524/81704/101/7869/3640/4318/56920/5025/10500/5747/4739/6369/22800/284403/2041/3315/1512/5031/4254/3265/2549/7423/3678/2048/4150/1839/6688/58494/1613/4921/3676/6376/1907/10630/3071/6403/3592/729230/22954/3488/2254/5154/6776/6504/2621/4133/71/958/387/6810/1601/3655/57402/3082/51157/5228/4267/8877/1672/147372/2821/2526/3685/3918/150/406…
BP	GO:2000147	positive regulation of cell motility	485	-0.396855	-2.17472	1e-10	1.18682e-08	8.80861e-09	4598	tags=37%, list=18%, signal=31%	10016/5724/1545/9037/6789/9723/25/57381/5354/2241/56034/81029/1524/81704/101/7869/3640/4318/56920/5025/10500/5747/4739/6369/22800/284403/2041/3315/1512/5031/4254/3265/2549/7423/3678/2048/4150/1839/6688/58494/1613/4921/3676/6376/1907/10630/3071/6403/3592/729230/22954/3488/2254/5154/6776/6504/2621/71/958/387/6810/1601/3655/57402/3082/51157/5228/4267/8877/1672/147372/2821/2526/3685/3918/150/4067/59/…
BP	GO:0030198	extracellular matrix organization	281	-0.41956	-2.17434	1e-10	1.18682e-08	8.80861e-09	4737	tags=38%, list=19%, signal=31%	11005/8434/858/1545/7075/2295/84627/25/4629/4314/81792/84695/101/4318/4319/1287/8516/84171/91522/1295/57326/79148/170691/55790/4921/2006/1305/10630/4791/11173/1300/2621/255743/4320/85301/1511/9510/255631/23213/1299/1286/1303/169611/2296/1471/9622/2192/151887/1285/1290/650/9509/780/2022/1277/1282/10516/8751/55612/3915/23768/10491/7042/5768/1289/4358/83716/857/25903/64094/1298/2199/1307/23187/1281/…
BP	GO:0045229	external encapsulating structure organization	284	-0.419272	-2.17426	1e-10	1.18682e-08	8.80861e-09	4774	tags=38%, list=19%, signal=31%	7051/11005/8434/858/1545/7075/2295/84627/25/4629/4314/81792/84695/101/4318/4319/1287/8516/84171/91522/1295/57326/79148/170691/55790/4921/2006/7053/1305/10630/4791/11173/1300/2621/255743/4320/85301/1511/9510/255631/23213/1299/1286/1303/169611/2296/1471/9622/2192/151887/1285/1290/650/9509/780/2022/1277/1282/10516/8751/55612/3915/23768/10491/7042/5768/1289/4358/83716/857/25903/64094/1298/2199/1307/2…
BP	GO:0040017	positive regulation of locomotion	499	-0.39569	-2.17399	1e-10	1.18682e-08	8.80861e-09	4598	tags=37%, list=18%, signal=31%	10016/5724/1545/9037/6789/9723/25/57381/5354/2241/56034/81029/1524/81704/101/7869/3640/4318/56920/5025/10500/5747/4739/6369/22800/284403/2041/3315/1512/5031/4254/3265/2549/7423/3678/2048/4150/1839/6688/58494/1613/4921/3676/6376/1907/10630/3071/6403/3592/729230/22954/3488/2254/5154/6776/6504/2621/71/958/387/6810/1601/3655/57402/3082/51157/5228/4267/8877/1672/55737/147372/2821/2526/3685/3918/150/40…
BP	GO:0043062	extracellular structure organization	282	-0.418462	-2.16994	1e-10	1.18682e-08	8.80861e-09	4737	tags=38%, list=19%, signal=31%	11005/8434/858/1545/7075/2295/84627/25/4629/4314/81792/84695/101/4318/4319/1287/8516/84171/91522/1295/57326/79148/170691/55790/4921/2006/1305/10630/4791/11173/1300/2621/255743/4320/85301/1511/9510/255631/23213/1299/1286/1303/169611/2296/1471/9622/2192/151887/1285/1290/650/9509/780/2022/1277/1282/10516/8751/55612/3915/23768/10491/7042/5768/1289/4358/83716/857/25903/64094/1298/2199/1307/23187/1281/…
BP	GO:0008202	steroid metabolic process	294	0.399576	2.16952	1e-10	1.18682e-08	8.80861e-09	5895	tags=47%, list=23%, signal=36%	2494/1071/3295/1595/4041/51422/338/255738/5007/6777/19/51360/1592/5562/6095/5825/319/84650/51706/38/6647/5444/114880/1544/3931/2638/3990/351/6770/23780/847/84649/2230/3290/570/64816/11160/10613/6799/2099/1557/51302/30/116519/6342/7363/6716/80270/7364/54659/10901/1589/1066/7124/8630/10998/10449/8856/1543/1582/3028/3158/3422/59338/33/6817/6718/3949/1576/445329/5629/51171/8912/1558/23600/6715/3293/1…
BP	GO:0060326	cell chemotaxis	273	-0.420389	-2.16568	1e-10	1.18682e-08	8.80861e-09	5270	tags=42%, list=21%, signal=34%	5872/1588/4354/6278/2207/23396/5365/5142/8600/79902/63916/7474/9037/6361/6357/6374/1524/101/5025/5747/6369/3315/6367/2549/79148/7423/643/1839/6688/6376/1907/6441/3071/6362/3680/3592/729230/6373/57580/6504/2621/683/6347/57402/3082/2841/51157/5228/1511/3164/4067/1906/1436/3958/2919/79890/3603/25865/3689/7114/5764/56833/5293/57175/27237/6850/5580/5879/1235/7042/6387/4283/1910/199/6558/64094/3627/190…
BP	GO:0050867	positive regulation of cell activation	331	-0.40942	-2.15906	1e-10	1.18682e-08	8.80861e-09	5225	tags=40%, list=21%, signal=33%	7040/5341/5788/23529/2624/59067/57829/8600/3118/6541/3135/7474/3117/5724/51293/7292/3596/81704/101/3125/975/970/55423/3559/4292/3120/2737/399/8767/8546/3119/2048/567/7158/952/10666/3071/3932/6403/3592/729230/114548/942/3594/6504/2621/683/6347/100/3684/958/387/6810/5914/54106/4352/3133/6812/4067/9760/59/959/695/3707/3916/57178/8764/10125/1075/23149/3689/29108/864/1949/26191/6714/84433/7305/916/796…
BP	GO:0016042	lipid catabolic process	287	0.398015	2.15767	1e-10	1.18682e-08	8.80861e-09	5052	tags=41%, list=20%, signal=33%	83752/57406/3295/10478/50640/8513/338/84696/9663/57834/35/51099/34/255189/84129/2110/1592/5140/4051/5562/5825/38/5194/51/1892/5264/1544/6653/158584/26279/2639/83875/3990/9388/54363/32/3290/9588/5465/55268/51302/30/27349/39/116519/3030/1373/1381/6342/6716/3033/1066/4668/7124/8630/10449/129807/55862/3028/2822/375775/1579/5581/33/84693/6718/13/8228/26063/5105/80724/3949/1576/26061/2109/55627/51365/5…
BP	GO:0032943	mononuclear cell proliferation	281	-0.41601	-2.15595	1e-10	1.18682e-08	8.80861e-09	4587	tags=38%, list=18%, signal=31%	7157/2697/51293/3070/7292/25/384/931/3596/81704/4064/975/970/3559/11119/3446/8767/2048/2281/8654/952/6441/3071/1178/4478/3592/729230/942/3594/6504/683/944/100/958/54106/4352/3133/4067/1794/959/695/3445/11314/3958/8764/10125/57045/930/29108/26191/84433/5532/23385/10457/652/7305/5585/916/79679/581/977/6850/5580/9466/54440/5699/596/57181/3600/199/2064/2000/7293/1493/3105/6352/940/11035/3113/23228/42…
BP	GO:0002696	positive regulation of leukocyte activation	319	-0.407561	-2.14523	1e-10	1.18682e-08	8.80861e-09	4801	tags=39%, list=19%, signal=32%	8600/3118/6541/3135/7474/3117/5724/51293/7292/3596/81704/101/3125/975/970/55423/3559/4292/3120/2737/399/8767/8546/3119/2048/567/7158/952/10666/3071/3932/3592/729230/114548/942/3594/6504/2621/683/6347/100/3684/958/387/6810/5914/54106/4352/3133/6812/4067/9760/959/695/3707/3916/57178/8764/10125/1075/23149/3689/29108/864/1949/26191/6714/84433/7305/916/79679/6850/9466/54440/3543/961/596/2736/57181/867…
BP	GO:0051249	regulation of lymphocyte activation	416	-0.394435	-2.14211	1e-10	1.18682e-08	8.80861e-09	4801	tags=37%, list=19%, signal=30%	8600/3118/6541/11005/7128/3135/3117/51293/7292/25/57864/384/3596/81704/84695/3662/101/3125/975/970/55423/3559/4292/3120/2737/399/8767/100507436/64092/8546/3119/2048/56339/567/8654/7158/952/6441/3071/1178/3932/3592/729230/114548/942/3594/6504/2621/683/6347/944/100/958/387/5914/54106/25807/1511/55024/4352/3133/4067/9760/959/695/55824/11314/3707/3958/3916/7301/57178/8764/27040/10125/57045/23149/639/…
BP	GO:0030217	T cell differentiation	246	-0.41934	-2.13522	1e-10	1.18682e-08	8.80861e-09	5715	tags=45%, list=23%, signal=35%	91543/159296/8943/3123/9655/10875/7409/1021/7248/5788/2207/59067/10538/11005/3135/23598/7157/7292/8324/25/57864/5734/3821/84695/3662/101/2629/3559/5971/80758/2737/860/399/8320/8767/8546/8325/6688/56339/567/26022/3071/3932/729230/114548/942/57580/3594/944/100/387/6146/5914/3140/2841/3955/4063/9760/1794/3707/57178/10945/10125/10312/639/864/26191/84433/5293/5532/652/916/6850/54440/1235/596/2736/3714…
BP	GO:0045785	positive regulation of cell adhesion	417	-0.386657	-2.10011	1e-10	1.18682e-08	8.80861e-09	5979	tags=43%, list=24%, signal=34%	10451/960/140885/6422/51561/566/2534/7784/283234/8943/4680/3123/9655/10551/7409/1012/1021/10562/10211/7248/5788/91663/3654/10519/59067/57829/285613/3976/8600/3118/6541/59339/3135/7474/3117/10076/5724/6789/7292/25/81704/101/3125/975/970/55423/3559/3120/4739/2737/2041/1295/399/8767/3678/8546/3119/3728/567/6484/3676/6376/10630/3071/3932/6403/3592/729230/114548/942/57580/3594/3611/6504/6347/255743/10…
BP	GO:0007159	leukocyte cell-cell adhesion	344	-0.396566	-2.09948	1e-10	1.18682e-08	8.80861e-09	4825	tags=38%, list=19%, signal=31%	10318/8600/3118/6541/3135/3117/5724/7292/384/1524/81704/84695/101/3125/975/970/55423/3559/3120/2737/4973/399/8767/3678/8546/3119/6793/58494/567/8654/6484/3676/3683/6441/3071/3932/6403/4478/3592/729230/114548/942/3594/6504/6347/100/387/5914/1511/3133/2526/4067/959/83706/55824/11314/3707/3958/57178/8764/10125/57045/23149/2113/7805/3689/29108/864/1949/3695/26191/6714/84433/10457/652/916/79679/6850/5…
BP	GO:0001525	angiogenesis	467	-0.381305	-2.08435	1e-10	1.18682e-08	8.80861e-09	4737	tags=36%, list=19%, signal=29%	11005/2828/7128/8434/3135/7474/5728/10016/51548/6833/1545/7075/9037/6789/9723/57057/22905/25/57381/113026/3674/1524/84432/101/7127/23129/57674/5747/6369/7098/2041/1295/10411/64321/3315/1512/6464/10203/2549/7716/161742/7423/3678/8325/2048/3213/3728/6672/6376/1907/7039/3592/729230/4776/10553/2254/3339/5797/5154/22846/10800/91010/4627/7534/8862/6347/71/958/387/3082/79400/5228/6019/5740/8877/147372/3…
BP	GO:1903037	regulation of leukocyte cell-cell adhesion	309	-0.39849	-2.08406	1e-10	1.18682e-08	8.80861e-09	4801	tags=38%, list=19%, signal=31%	8600/3118/6541/3135/3117/5724/7292/384/81704/84695/101/3125/975/970/55423/3559/3120/2737/399/8767/8546/3119/567/8654/6484/3676/6441/3071/3932/6403/3592/729230/114548/942/3594/6504/6347/100/387/5914/1511/3133/2526/4067/959/55824/11314/3707/3958/57178/8764/10125/57045/23149/2113/7805/3689/29108/864/1949/26191/6714/84433/10457/652/916/79679/6850/54900/9466/54440/961/2736/6387/857/3600/6659/199/29851…
BP	GO:0030098	lymphocyte differentiation	359	-0.384502	-2.04877	1e-10	1.18682e-08	8.80861e-09	5715	tags=42%, list=23%, signal=33%	91543/159296/8943/3123/9655/28514/10875/7409/115352/1021/2322/7248/5788/23529/1015/2207/59067/10538/56262/51341/11334/11005/3135/23598/7157/7292/8324/25/57864/931/5734/3821/84695/3662/101/2629/3559/5971/80758/2737/974/860/399/8320/3446/8767/8546/8325/6688/56339/567/55619/139818/3676/26022/3071/3932/729230/114548/942/57580/6929/3594/6504/2621/944/100/387/6146/4242/5914/54106/3140/2841/3955/4063/97…
BP	GO:0002694	regulation of leukocyte activation	498	-0.372114	-2.04267	1e-10	1.18682e-08	8.80861e-09	4801	tags=35%, list=19%, signal=29%	8600/3118/6541/11005/7128/3135/7474/3117/5724/51293/7292/25/2241/57864/384/3596/81704/84695/3662/101/3125/975/970/55423/3559/4292/3120/2737/6622/399/8767/100507436/64092/8546/3119/2048/6688/56339/567/8654/7158/952/10666/6376/6441/3071/1178/3932/3592/729230/114548/942/3594/6504/2621/683/6347/944/100/3684/958/387/6810/5914/54106/25807/8877/1511/55024/4352/3133/6812/4067/9760/959/695/55824/11314/370…
BP	GO:1903131	mononuclear cell differentiation	405	-0.375451	-2.03133	1e-10	1.18682e-08	8.80861e-09	5715	tags=41%, list=23%, signal=32%	91543/159296/8544/8943/3123/9655/28514/640/10875/7409/115352/1021/2322/7248/5788/23529/5153/1015/2207/59067/10538/56262/51341/11334/11005/3135/23598/7157/3428/7292/8324/25/57864/931/5734/3821/84695/3662/101/2629/3559/5971/80758/2737/974/860/399/8320/3446/8767/8546/8325/6688/56339/567/55619/139818/3676/26022/3071/3932/729230/114548/942/57580/6929/4627/3594/116071/2194/6504/2621/944/100/387/6146/42…
BP	GO:0006091	generation of precursor metabolites and energy	400	0.359467	2.02964	1e-10	1.18682e-08	8.80861e-09	4773	tags=35%, list=19%, signal=29%	664/23530/2819/29958/51422/3416/2271/3454/3572/178/5167/2584/34/51022/4718/2110/2395/5562/552/1327/38/51/4191/201626/4720/2998/2203/5860/4719/2027/2936/1544/5502/27069/79751/8864/10105/3795/351/55526/126/847/10165/87178/2230/5224/9611/3155/5465/3479/5255/53632/551/378884/229/5236/6390/10891/8659/217/291/10840/3939/7124/92259/8630/10998/7415/64080/26227/6391/51071/51085/3158/10131/51103/55022/5027…
BP	GO:0044283	small molecule biosynthetic process	494	0.348727	2.02146	1e-10	1.18682e-08	8.80861e-09	6374	tags=45%, list=25%, signal=34%	8942/50640/2819/1595/51422/338/55256/5053/132/84696/2643/5631/57834/6296/23516/441024/55312/57486/18/5007/8564/34/255189/4522/5164/51360/5562/552/5825/84105/7358/4552/64577/1806/2875/64902/6647/2752/2203/5860/6652/3612/114880/1544/8864/2542/3990/22928/6770/875/9388/10165/55163/84649/8789/32/2746/5224/3155/5465/570/11160/10613/6470/2806/53632/1468/551/51805/51302/27349/5236/116519/10891/1373/6342/…
BP	GO:0022407	regulation of cell-cell adhesion	409	-0.362987	-1.96718	1e-10	1.18682e-08	8.80861e-09	4801	tags=37%, list=19%, signal=31%	5788/91663/5598/3654/59067/57829/1952/8600/3118/6541/3135/7474/3117/10076/5724/7292/5314/25/384/81704/84695/101/3125/975/970/55423/3559/3120/5747/2737/399/8767/51201/8546/3119/6688/56339/567/8654/6484/3676/6376/6441/10630/3071/3932/6403/3592/729230/114548/942/3594/6504/6347/100/387/5914/1511/3133/2526/4067/959/83706/55824/11314/3707/3958/9647/57178/8764/10125/57045/23149/2113/7805/3689/29108/864/…
BP	GO:1901615	organic hydroxy compound metabolic process	492	0.338565	1.96164	1e-10	1.18682e-08	8.80861e-09	5591	tags=39%, list=22%, signal=31%	2494/1071/2819/1595/117247/4041/51422/338/5053/2643/255738/57834/6505/18/5007/9562/2584/19/51360/1592/4051/5562/5825/84105/389434/319/84650/51706/6647/5860/6652/5444/3612/114880/1544/3931/81537/2638/8864/1814/3990/351/6770/23780/126/847/55163/84649/54363/2230/570/11160/10613/3479/6799/51805/51302/30/1562/116519/6342/1644/6716/80270/217/54659/1719/10901/1589/1066/3939/29968/84869/7124/8630/10998/1…
BP	GO:0002250	adaptive immune response	409	-0.359954	-1.95074	1e-10	1.18682e-08	8.80861e-09	4312	tags=40%, list=17%, signal=34%	7040/11024/733/7248/5788/23529/2207/10538/3004/924/3118/89790/7128/10384/3135/3117/7292/384/1524/51311/170482/3821/911/84695/3662/3125/2208/6891/975/970/5971/4292/3120/2209/80758/974/10411/11119/1512/10462/64167/8320/3446/3265/8767/100507436/64092/3119/2048/567/4277/7158/5551/5133/10666/26022/3071/1178/3592/729230/4791/114548/942/910/3594/6504/100/958/712/50615/28988/3140/50852/11118/909/89857/50…
BP	GO:0051493	regulation of cytoskeleton organization	447	-0.351747	-1.91766	1e-10	1.18682e-08	8.80861e-09	4731	tags=34%, list=19%, signal=28%	9873/51510/128272/10092/55835/10174/9037/9723/10552/25/85477/2241/859/10602/54509/5734/396/822/54959/10093/60312/8045/2314/2044/2011/5747/684/6369/54434/79822/2041/10411/6622/399/3265/5066/29899/1613/11344/5999/80206/130271/80115/51199/274/28964/6376/2006/3071/8826/4135/6709/11186/10300/5154/4133/683/51474/5119/55201/71/387/57132/9620/10263/9793/29082/28988/50853/55558/22899/1627/10152/5058/2934/…
BP	GO:0044242	cellular lipid catabolic process	199	0.431829	2.25113	1.04312e-10	1.21952e-08	9.05131e-09	5864	tags=48%, list=23%, signal=37%	83752/57406/3295/10478/50640/338/84696/9663/35/51099/34/255189/84129/2110/1592/5825/38/5194/51/1892/5264/6653/2639/83875/3990/9388/54363/32/9588/5465/55268/30/27349/39/116519/3030/1373/1381/6342/3033/4668/10449/129807/55862/3028/2822/375775/33/84693/13/8228/26063/5105/80724/3949/26061/2109/55627/23600/150379/1666/23175/5095/2166/54677/27329/11001/5830/8309/37/10994/222236/1384/1891/283748/2108/11…
BP	GO:0002429	immune response-activating cell surface receptor signaling pathway	202	-0.442582	-2.20693	1.1476e-10	1.30277e-08	9.66922e-09	3875	tags=38%, list=15%, signal=32%	5747/974/11119/3265/8767/3119/11120/2359/4277/952/10666/3071/3932/100/919/50852/11118/89857/55024/4067/79908/5058/695/11314/3958/9404/10616/7462/55072/23149/121665/7805/25865/930/29085/26191/6714/84433/5293/7305/79679/5583/581/2874/10657/6850/54900/5580/84174/79037/3543/961/596/64005/57181/1493/3105/5335/940/5144/23228/4208/7070/925/6188/4068/3635/123920/973/3115/3702/7535/5777/27242/784/1236
BP	GO:0002757	immune response-activating signal transduction	202	-0.442582	-2.20693	1.1476e-10	1.30277e-08	9.66922e-09	3875	tags=38%, list=15%, signal=32%	5747/974/11119/3265/8767/3119/11120/2359/4277/952/10666/3071/3932/100/919/50852/11118/89857/55024/4067/79908/5058/695/11314/3958/9404/10616/7462/55072/23149/121665/7805/25865/930/29085/26191/6714/84433/5293/7305/79679/5583/581/2874/10657/6850/54900/5580/84174/79037/3543/961/596/64005/57181/1493/3105/5335/940/5144/23228/4208/7070/925/6188/4068/3635/123920/973/3115/3702/7535/5777/27242/784/1236
CC	GO:0005840	ribosome	194	-0.44357	-2.19677	1.26146e-10	1.39334e-08	1.03414e-08	4016	tags=37%, list=16%, signal=31%	3040/51065/6201/6135/6137/6231/122704/6138/6173/6168/219927/11224/6133/6224/6130/6160/6203/6146/6171/6124/6235/6142/6141/25873/51373/6189/3921/8667/6208/6191/9636/6209/6233/6218/6143/347/6217/6232/54460/6170/6181/6132/6230/6152/689/6222/6175/6207/6204/124995/6136/6193/6144/6206/6156/6210/6227/116832/6154/6223/6194/6188/6187/4736/6169/6205/6139/6157/51538/8705/23521/6165
BP	GO:0022409	positive regulation of cell-cell adhesion	273	-0.401776	-2.0698	1.26295e-10	1.39334e-08	1.03414e-08	4801	tags=39%, list=19%, signal=32%	8600/3118/6541/3135/7474/3117/10076/5724/7292/81704/101/3125/975/970/55423/3559/3120/2737/399/8767/8546/3119/567/6484/3676/6376/10630/3071/3932/6403/3592/729230/114548/942/3594/6504/6347/100/387/5914/1511/3133/2526/4067/959/3707/57178/8764/10125/23149/2113/3689/29108/864/1949/26191/6714/84433/916/79679/2525/6850/9466/54440/961/2736/288/857/3600/6659/199/29851/3105/3112/6352/940/5420/84034/3113/93…
BP	GO:0032103	positive regulation of response to external stimulus	392	-0.358	-1.93211	2.07332e-10	2.2556e-08	1.67412e-08	4825	tags=34%, list=19%, signal=28%	10318/8600/4889/2828/3135/7474/4818/3428/9037/7292/1524/51311/5734/9450/101/4064/975/5025/5747/6369/7098/90933/6622/3315/8767/7423/9782/6688/2281/55601/10666/6376/1907/3071/3592/729230/6504/2621/6810/55450/57402/54106/51157/5228/245928/3133/4067/5058/81030/1906/4841/1436/695/9647/3916/64170/3603/10125/1075/55072/2113/25865/29108/6714/7114/1690/5764/10133/7305/149628/10392/117854/6850/115362/5879/…
BP	GO:0042098	T cell proliferation	190	-0.439093	-2.17339	2.72319e-10	2.92202e-08	2.16874e-08	4782	tags=41%, list=19%, signal=33%	6541/3135/7157/2697/7292/25/384/81704/975/970/3559/11119/8767/2281/8654/6441/3071/1178/4478/729230/942/3594/6504/944/3133/1794/959/3958/8764/10125/57045/29108/26191/84433/5532/23385/10457/652/916/79679/581/977/6850/9466/54440/5699/3600/199/2064/2000/7293/1493/3105/6352/940/11035/3113/6194/2615/6188/3109/896/923/11151/3115/301/5294/3965/7535/54361/5777/27242/5880/100133941/6363/8440/10673
CC	GO:0009897	external side of plasma membrane	350	-0.369103	-1.9612	3.92967e-10	4.15961e-08	3.08728e-08	5541	tags=43%, list=22%, signal=34%	9976/343413/966/5023/154796/1012/696/10211/6338/5788/3563/2207/65078/2219/3687/2159/10384/3135/4684/2350/2675/5314/165530/3674/3604/1524/931/51311/170482/3596/3821/5243/911/2208/3560/338328/3559/8516/2044/974/117531/11119/10462/100507436/3678/80741/643/11120/567/4277/50489/3676/3683/762/5133/10666/55867/3680/6403/729230/942/910/3594/6504/100/3684/958/3655/657/50615/3140/1438/8515/11118/909/4352/5…
BP	GO:0016053	organic acid biosynthetic process	285	0.372365	2.01681	4.14178e-10	4.32567e-08	3.21053e-08	5052	tags=41%, list=20%, signal=33%	8942/50640/51422/55256/5053/84696/57834/6296/441024/18/5007/8564/255189/4522/5562/552/5825/84105/7358/4552/64577/1806/64902/2752/114880/1544/8864/3990/22928/6770/875/9388/32/2746/570/11160/10613/6470/2806/53632/551/51302/27349/116519/1373/6342/80270/1719/10157/1066/29968/84869/10998/26227/1543/2628/1582/3028/4507/256987/51085/5092/284541/5313/54995/1579/54988/33/6718/435/26063/123876/1576/4706/56…
BP	GO:0002683	negative regulation of immune system process	370	-0.358182	-1.91149	4.67962e-10	4.82308e-08	3.57971e-08	6511	tags=44%, list=26%, signal=33%	7107/1997/868/10039/56940/5621/10385/1843/23495/23236/79626/127943/409/60343/10464/1380/9111/6422/714/2534/3123/9655/79004/640/966/10875/115352/1021/146722/84166/53347/7040/1588/4940/5788/2624/10906/4057/4889/11005/7128/3135/3428/7292/2241/384/1524/56834/5734/3821/84695/103/3559/2737/684/7098/4254/79148/100507436/64092/6688/56339/8654/5133/6376/6441/3071/729230/942/653/6504/6347/100/134/5914/2841…
BP	GO:0007229	integrin-mediated signaling pathway	98	-0.529096	-2.38918	7.89558e-10	8.03196e-08	5.96135e-08	4410	tags=49%, list=18%, signal=41%	25/3674/84695/7791/8516/5747/4739/55920/3693/3678/3676/3683/3680/5786/4627/3611/683/3684/3655/8515/3909/3685/9510/959/83706/1495/27040/3675/9636/3689/3695/9270/6714/5764/7076/6850/8751/55612/961/1307/3673/1281/7070/3691/2530/10077/5587/967
BP	GO:0032956	regulation of actin cytoskeleton organization	303	-0.377141	-1.97512	8.24539e-10	8.28028e-08	6.14566e-08	4505	tags=36%, list=18%, signal=30%	10174/9037/9723/10552/25/85477/2241/859/10602/54509/5734/396/822/54959/10093/2314/2044/684/6369/54434/79822/2041/10411/399/3265/5066/1613/11344/5999/80206/130271/80115/274/6376/2006/3071/8826/6709/5154/683/51474/71/387/9620/28988/50853/22899/1627/10152/5058/2934/171024/1906/1436/7016/9647/23433/120/5216/10095/29108/9270/389/29085/6548/7114/7168/9535/90952/57175/3925/51466/7454/23370/10163/5580/58…
BP	GO:0009069	serine family amino acid metabolic process	34	0.725792	2.70925	9.9038e-10	9.81981e-08	7.2883e-08	3734	tags=71%, list=15%, signal=60%	2729/4522/64902/2618/22928/875/51540/570/6470/1719/29968/26227/256987/23464/4357/275/7263/1036/6472/22929/189/10249/51380/2731
BP	GO:0046394	carboxylic acid biosynthetic process	283	0.368897	1.99501	1.11182e-09	1.08861e-07	8.07971e-08	5052	tags=41%, list=20%, signal=33%	8942/50640/51422/55256/5053/84696/57834/6296/441024/18/5007/8564/255189/4522/5562/552/5825/84105/7358/4552/64577/1806/64902/2752/114880/1544/8864/3990/22928/6770/875/9388/32/2746/570/11160/10613/6470/2806/53632/551/51302/27349/116519/1373/6342/80270/1719/10157/1066/29968/84869/10998/26227/1543/2628/1582/3028/4507/256987/51085/5092/284541/5313/54995/1579/54988/33/6718/435/26063/123876/1576/4706/56…
CC	GO:0005777	peroxisome	117	0.484258	2.32192	1.16629e-09	1.11409e-07	8.2688e-08	5158	tags=49%, list=21%, signal=39%	83752/8800/3295/10478/50640/3416/84263/2180/84129/5825/5194/51/6647/5264/91452/196743/847/54363/3155/570/30/4257/317749/6342/10901/5827/10965/3422/3418/26063/5189/51179/26061/4591/4077/25824/23600/55825/54677/11001/84896/8504/189/51015/5830/8309/1384/23305/1891/51268/92960/5824/23417/5826/8540/1962/1428
CC	GO:0042579	microbody	117	0.484258	2.32192	1.16629e-09	1.11409e-07	8.2688e-08	5158	tags=49%, list=21%, signal=39%	83752/8800/3295/10478/50640/3416/84263/2180/84129/5825/5194/51/6647/5264/91452/196743/847/54363/3155/570/30/4257/317749/6342/10901/5827/10965/3422/3418/26063/5189/51179/26061/4591/4077/25824/23600/55825/54677/11001/84896/8504/189/51015/5830/8309/1384/23305/1891/51268/92960/5824/23417/5826/8540/1962/1428
MF	GO:0030020	extracellular matrix structural constituent conferring tensile strength	38	-0.705553	-2.62445	1.45038e-09	1.36877e-07	1.01591e-07	4036	tags=68%, list=16%, signal=58%	1287/91522/1295/1305/1300/85301/255631/1299/1286/1303/1285/1290/1277/1282/1291/1289/1298/1307/1281/1284/1296/1278/1293/7373/1306/1292
BP	GO:0050778	positive regulation of immune response	458	-0.338593	-1.85457	1.98452e-09	1.85056e-07	1.37349e-07	3357	tags=29%, list=13%, signal=25%	6688/11120/2359/567/4277/7158/952/10666/3071/3932/3592/729230/114548/942/910/3594/6504/100/3684/958/6810/712/919/5914/3140/50852/11118/909/1511/89857/55024/3133/6812/7186/4067/79908/5058/81030/4841/695/11314/3958/9404/10616/3916/64170/10125/7462/55072/23149/121665/7805/25865/3689/930/29108/913/29085/26191/713/6714/1690/84433/5293/7305/149628/79679/5583/581/117854/2874/10657/6850/115362/54900/5580…
BP	GO:0019882	antigen processing and presentation	99	-0.519827	-2.34481	2.47005e-09	2.27622e-07	1.68942e-07	4851	tags=55%, list=19%, signal=44%	2207/10981/3118/3135/3117/5865/911/2629/3125/6891/115827/5971/3120/5696/1512/64167/8546/3119/9363/567/5869/51762/910/3140/909/50856/3133/29108/913/1509/23457/10392/6892/7454/6890/3136/54209/3105/3112/3113/925/3122/3109/5720/3108/3115/3106/83871/3134/972/6363/3111/1236/6366
BP	GO:0032970	regulation of actin filament-based process	342	-0.364304	-1.92557	2.62053e-09	2.38681e-07	1.7715e-07	5206	tags=39%, list=21%, signal=32%	5341/4703/54828/7248/91663/1829/85458/7134/5142/6331/9873/128272/10092/10174/9037/9723/10552/25/85477/2241/859/10602/54509/5734/396/822/54959/10093/2314/2044/684/6369/54434/79822/2041/10411/399/3265/5066/3728/1613/11344/5999/80206/130271/80115/274/6376/2006/10630/3071/287/8826/6709/1265/5154/4627/683/51474/71/387/9620/134/28988/50853/22899/1627/10152/59/5058/2934/171024/1906/1436/7016/9647/23433/…
BP	GO:0050921	positive regulation of chemotaxis	130	-0.475627	-2.24695	2.81169e-09	2.50718e-07	1.86084e-07	3958	tags=40%, list=16%, signal=34%	5025/5747/3315/7423/6688/1907/3071/3592/729230/6504/2621/6810/57402/51157/5228/1906/1436/9647/3603/25865/7114/5764/5879/1235/6387/199/64094/3627/54209/3673/10344/6352/23075/63940/5595/7852/3965/846/7424/9353/5155/27347/5587/2152/5880/5159/80310/972/6363/1236/4192/6366
CC	GO:0005743	mitochondrial inner membrane	371	0.336088	1.88363	2.81669e-09	2.50718e-07	1.86084e-07	6217	tags=40%, list=25%, signal=30%	23530/23788/94081/64969/441024/3329/788/84129/9801/4718/9131/284439/2110/3052/1327/51253/4720/6687/4719/54148/22/27069/79751/666/58510/1723/51021/131118/10165/10845/80273/622/10469/1468/1191/51805/9512/6390/4653/3030/1373/94097/25994/291/55210/92259/64983/129807/57129/1543/2628/6391/4833/10131/23464/51103/55735/3954/60558/3313/51312/10884/7385/51642/8402/4706/84274/51295/8034/83733/118980/55173/6…
BP	GO:0002764	immune response-regulating signaling pathway	361	-0.359822	-1.91969	2.92098e-09	2.57079e-07	1.90805e-07	6730	tags=47%, list=27%, signal=35%	4814/4938/1967/2625/84282/3824/4340/1997/10333/8638/868/56940/5621/10385/728/409/285852/153090/26065/10451/3822/1380/9111/2534/91543/3123/11331/64922/640/7409/115352/146722/53347/696/10211/9698/57590/4940/5788/3654/2207/2219/25921/55198/5142/10318/4057/7128/10384/3135/25/2241/57864/9684/931/23586/51311/3821/3662/3125/975/5747/974/7098/11119/5284/1512/3265/8767/81035/8546/3119/11120/2359/4277/5560…
BP	GO:0032944	regulation of mononuclear cell proliferation	217	-0.40298	-2.02892	3.02479e-09	2.63258e-07	1.95391e-07	3264	tags=31%, list=13%, signal=27%	8654/952/6441/3071/1178/3592/729230/942/3594/6504/683/944/100/958/54106/4352/3133/4067/959/695/11314/3958/8764/57045/29108/26191/84433/10457/652/7305/5585/916/79679/6850/9466/54440/596/57181/3600/199/2064/7293/1493/3105/6352/940/11035/3113/4208/2615/6188/3109/923/3635/11151/3115/301/3965/7535/5777/27242/5880/100133941/972/6363/8440/10673
BP	GO:0055086	nucleobase-containing small molecule metabolic process	469	0.315388	1.81522	3.09012e-09	2.65988e-07	1.97417e-07	5192	tags=36%, list=21%, signal=29%	6999/8942/3295/2819/51703/51422/64087/132/5631/6296/441024/55312/221823/5167/2180/8564/9414/2584/4522/5164/23443/10135/51166/5562/6095/7358/1806/38/79646/5151/2981/2203/10924/8460/4329/2745/2027/2618/8459/2639/1723/10020/351/53354/55526/10165/23475/4913/84649/5471/32/1807/5224/80347/9611/5465/570/3479/6470/22978/53632/6799/229/5236/125061/10891/1373/203/65220/5169/2135/10157/3939/5198/7415/9626/1…
CC	GO:0005782	peroxisomal matrix	47	0.635062	2.56639	3.17432e-09	2.6736e-07	1.98435e-07	5158	tags=62%, list=21%, signal=49%	83752/3295/3416/5825/51/5264/196743/847/54363/3155/570/30/6342/10901/10965/51179/26061/25824/23600/54677/189/8309/1384/1891/51268/23417/8540/1962/1428
CC	GO:0031907	microbody lumen	47	0.635062	2.56639	3.17432e-09	2.6736e-07	1.98435e-07	5158	tags=62%, list=21%, signal=49%	83752/3295/3416/5825/51/5264/196743/847/54363/3155/570/30/6342/10901/10965/51179/26061/25824/23600/54677/189/8309/1384/1891/51268/23417/8540/1962/1428
BP	GO:0002009	morphogenesis of an epithelium	473	-0.329715	-1.80495	3.24945e-09	2.70776e-07	2.00971e-07	6171	tags=39%, list=25%, signal=30%	7414/317/2255/8985/7482/5100/25876/85407/6259/26005/960/10959/25928/55966/94/6422/3237/9968/4919/23654/8323/5727/11331/2252/28514/1951/585/8854/220/65266/7040/7248/5898/342574/1952/3872/23245/3976/3687/5754/10371/388585/128272/3859/7474/55036/5728/25902/51548/2697/7075/2295/8820/6789/9723/57057/7484/5314/8324/25/859/81029/81792/55212/60/23129/3214/1741/5499/2737/6201/64321/55081/1512/3678/26249/1…
CC	GO:0005581	collagen trimer	80	-0.54665	-2.39579	3.44119e-09	2.83735e-07	2.1059e-07	4036	tags=50%, list=16%, signal=42%	1287/91522/1295/10882/81035/6441/1305/1300/115908/712/85301/147372/255631/1299/1286/1303/713/1285/1290/114905/1277/1282/1291/1289/114897/1298/1307/1281/1284/84034/4060/78989/11117/1296/1278/1293/7373/1306/114902/1292
BP	GO:0009117	nucleotide metabolic process	403	0.326454	1.84538	3.55129e-09	2.89763e-07	2.15063e-07	5192	tags=35%, list=21%, signal=29%	6999/8942/3295/2819/51703/51422/64087/132/5631/6296/441024/55312/221823/5167/2180/8564/9414/2584/4522/5164/10135/51166/5562/6095/1806/38/79646/5151/2981/2203/8460/2027/2618/8459/2639/1723/351/53354/55526/10165/23475/4913/84649/5471/32/1807/5224/80347/9611/5465/570/3479/6470/22978/53632/6799/229/5236/125061/10891/203/65220/5169/10157/3939/5198/7415/9626/10965/51071/51085/3158/4833/55022/5027/4837/…
BP	GO:0097529	myeloid leukocyte migration	205	-0.420009	-2.09	3.66896e-09	2.96278e-07	2.19899e-07	5209	tags=43%, list=21%, signal=34%	1588/4354/6278/2207/23396/5142/8600/79902/6361/6357/6374/1524/5734/101/975/5025/5747/6369/399/6367/79148/7423/6688/6376/1907/6441/3071/6362/3680/729230/6373/57580/6504/683/6347/57402/5228/4267/1511/2526/4067/1906/1436/11314/3958/2919/79890/3689/255231/56833/5293/4920/6850/5879/961/7042/6387/4283/1910/199/3627/54209/10344/6352/51192/23075/5175/6223/4681/6372/11117/83700/5595/301/5294/682/3815/7424…
BP	GO:1902903	regulation of supramolecular fiber organization	318	-0.370303	-1.94654	3.81972e-09	3.05305e-07	2.26598e-07	4505	tags=35%, list=18%, signal=29%	10174/9037/10552/25/85477/2241/859/10602/5734/822/10093/2314/6369/54434/79822/2041/10411/6622/1613/11344/5999/80206/130271/80115/51199/274/28964/6376/2006/5203/3071/6709/10300/4133/51474/55201/71/387/9793/28988/50853/22899/1627/10152/5058/2934/171024/1906/7016/9647/120/5216/10095/29108/9270/389/403/6548/7114/7168/9535/90952/57175/4131/3925/51466/7454/89795/23370/10163/5580/4926/5879/961/6387/1009…
CC	GO:0009295	nucleoid	37	0.681142	2.61199	4.22785e-09	3.31168e-07	2.45794e-07	3967	tags=62%, list=16%, signal=52%	116447/1763/64216/6832/60528/10845/2926/3030/1373/55210/3028/26073/22868/3313/9361/7015/10128/5428/1629/6472/37/60493/7019
CC	GO:0042645	mitochondrial nucleoid	37	0.681142	2.61199	4.22785e-09	3.31168e-07	2.45794e-07	3967	tags=62%, list=16%, signal=52%	116447/1763/64216/6832/60528/10845/2926/3030/1373/55210/3028/26073/22868/3313/9361/7015/10128/5428/1629/6472/37/60493/7019
BP	GO:0007204	positive regulation of cytosolic calcium ion concentration	285	-0.377972	-1.96152	4.41024e-09	3.42033e-07	2.53859e-07	5752	tags=40%, list=23%, signal=31%	2534/6261/9002/5026/5729/5023/2843/2280/805/624/146/51024/5788/9187/2624/8811/2587/778/5028/3357/2828/781/845/25/116/859/387129/1524/5737/931/5734/3596/10518/5025/2859/2905/6622/5031/4828/643/2359/22821/2281/5739/952/6376/1907/2846/3932/287/729230/162514/6373/5021/10800/6863/808/2841/8996/126306/553/3685/4067/1906/2769/10134/121665/930/255231/5731/1193/55503/55283/111/3270/581/6717/775/1235/596/8…
BP	GO:0001667	ameboidal-type cell migration	385	-0.347862	-1.8696	4.71112e-09	3.61786e-07	2.68519e-07	4863	tags=34%, list=19%, signal=28%	55198/9124/10371/3357/7474/23598/5728/10016/2697/1545/9037/9723/25/57381/2241/9839/7869/3640/4318/56920/29941/23129/5025/10500/5747/55920/64321/3315/1512/84159/4254/5646/161742/55466/6286/1839/3728/91862/6672/4921/3676/1907/8826/10755/5797/22846/4627/1460/3611/6776/958/387/51157/147372/3164/2821/59/8766/1906/27286/9404/7016/9647/2768/5613/54453/3675/5216/2113/25865/9965/3695/9270/11156/6714/7114/…
BP	GO:0015980	energy derivation by oxidation of organic compounds	242	0.378262	2.01659	5.30556e-09	4.0348e-07	2.99465e-07	4773	tags=35%, list=19%, signal=28%	664/23530/2819/51422/3416/2271/3454/3572/178/5167/34/4718/2110/2395/1327/4191/201626/4720/2998/4719/1544/5502/27069/79751/8864/10105/3795/55526/847/10165/87178/3479/5255/53632/378884/6390/10891/7124/92259/7415/6391/51085/10131/51103/55022/9650/79660/3418/10580/2109/7385/55753/7360/4706/83733/6392/8803/54205/374291/6472/5256/4702/5290/6389/4729/2632/37/3419/4967/2108/4731/7381/4609/4707/80219/3481…
BP	GO:0016125	sterol metabolic process	139	0.445797	2.20066	6.42571e-09	4.83967e-07	3.59202e-07	6374	tags=49%, list=25%, signal=37%	1071/1595/4041/51422/338/255738/19/51360/1592/5562/319/84650/51706/6647/5444/1544/3931/3990/351/6770/23780/847/84649/2230/11160/10613/51302/116519/1589/1066/10449/1582/3158/3422/33/6718/3949/1576/5447/27329/4047/6256/8542/37/6822/1585/2330/23461/3930/1581/335/8435/340665/10682/1559/8578/10858/3069/3156/10948/50814/336/3952/64137/3565/23541/2053/1593
BP	GO:0050670	regulation of lymphocyte proliferation	214	-0.409624	-2.06327	6.73078e-09	5.02117e-07	3.72673e-07	3264	tags=31%, list=13%, signal=27%	8654/952/6441/3071/1178/3592/729230/942/3594/6504/683/944/100/958/54106/4352/3133/4067/959/695/11314/3958/8764/57045/29108/26191/84433/10457/652/7305/5585/916/79679/6850/9466/54440/596/57181/3600/199/2064/7293/1493/3105/6352/940/11035/3113/4208/2615/6188/3109/923/3635/11151/3115/301/3965/7535/5777/27242/5880/100133941/972/6363/8440/10673
CC	GO:0030139	endocytic vesicle	320	-0.359383	-1.89302	7.04209e-09	5.20384e-07	3.86231e-07	4916	tags=38%, list=20%, signal=31%	53917/5898/160/4353/51715/84440/219972/25921/55198/10981/9367/4057/3118/3135/7474/3117/8724/818/22905/3043/81029/4689/101/3125/6891/533/7791/6814/3040/3120/2209/653361/1211/3693/81035/3119/122618/23682/1839/567/554/50489/51735/4688/6441/7039/5869/51762/6504/71/6810/4074/54106/1212/8992/7405/11031/1173/8877/3133/6812/3685/4067/2934/8766/80223/84329/79890/3916/311/54453/1856/10312/4641/8678/6233/10…
BP	GO:0046631	alpha-beta T cell activation	144	-0.468592	-2.24032	7.93445e-09	5.80847e-07	4.31107e-07	4589	tags=43%, list=18%, signal=35%	4818/7292/25/384/5734/84695/3662/3125/975/5971/80758/2737/8320/8767/8546/26022/3071/3592/729230/114548/942/3594/944/100/387/6146/5914/2841/50856/3133/4063/9760/1794/11314/3707/8764/10312/57045/639/864/26191/916/6850/54440/596/64919/3600/257101/114836/2000/3105/64218/940/3122/135/301/3702/3965/4602/7535/6363/51176
CC	GO:0042611	MHC protein complex	25	-0.760176	-2.56639	8.05589e-09	5.84276e-07	4.33652e-07	4800	tags=84%, list=19%, signal=68%	3118/3135/3117/3125/3120/3119/567/3140/3133/3136/3105/3112/3113/3122/3109/3108/3115/3106/3134/972/3111
BP	GO:0040013	negative regulation of locomotion	285	-0.374601	-1.94403	8.35752e-09	6.00591e-07	4.45761e-07	4703	tags=34%, list=19%, signal=28%	8434/7474/10076/23598/5728/6833/2697/1545/7075/9037/9723/5912/328/1524/5734/7869/5911/56920/10500/684/2041/161742/79148/55466/3728/91862/6672/6376/1800/3488/11188/1265/5797/653/22846/1460/6347/100/387/657/134/2841/55558/1495/23213/11314/2768/79890/9270/2192/3486/7168/56833/347/5300/7076/57175/8519/51466/393/2022/7454/89795/8751/9466/5879/10505/4286/596/6387/7026/51738/199/4070/182/64218/1281/5647…
BP	GO:0007015	actin filament organization	380	-0.347222	-1.86605	8.51394e-09	6.0627e-07	4.49976e-07	4760	tags=34%, list=19%, signal=28%	57471/9873/55761/63916/10092/10174/9037/10552/25/85477/2241/859/10602/54509/5734/822/10093/7791/2314/10097/4739/6369/54434/79822/2041/10411/399/3693/11344/5999/80206/130271/80115/274/6376/2006/3071/55607/6709/57580/10006/51474/71/387/28988/50853/221692/4644/22899/1627/10152/5058/2934/171024/79585/1495/226/7016/9647/120/253980/9051/5216/10095/65108/4641/29108/9270/389/10278/6548/6714/7114/7168/953…
BP	GO:0030595	leukocyte chemotaxis	208	-0.410144	-2.04988	9.58179e-09	6.76164e-07	5.01851e-07	5209	tags=43%, list=21%, signal=34%	1588/4354/6278/2207/23396/5142/8600/79902/7474/6361/6357/6374/1524/101/5747/6369/6367/79148/7423/643/6688/6376/1907/6441/3071/6362/3680/3592/729230/6373/57580/6504/2621/683/6347/57402/2841/51157/5228/1511/4067/1906/1436/3958/2919/79890/3603/3689/5764/56833/5293/6850/5879/1235/7042/6387/4283/1910/199/6558/3627/10344/6352/51192/23075/6223/4681/6372/83700/63940/5595/11151/9023/301/7852/5294/682/3965…
BP	GO:0071674	mononuclear cell migration	177	-0.421974	-2.07651	1.03771e-08	7.25746e-07	5.38651e-07	4497	tags=38%, list=18%, signal=32%	6361/6357/1524/81704/101/2629/5747/6369/6367/6793/6688/58494/3676/3683/6376/6362/4478/3592/729230/6373/653/6504/2621/6347/387/57402/4267/1511/2526/4067/1436/3958/8764/29108/3695/56833/5293/347/9466/961/1235/64005/6387/199/6558/3627/10344/6352/51192/11035/5175/6223/4681/5595/9023/301/7852/5294/3965/9353/7535/5155/27347/80310/6363/1236/4192/6366
BP	GO:0070665	positive regulation of leukocyte proliferation	149	-0.451015	-2.17509	1.15737e-08	8.0227e-07	5.95448e-07	5149	tags=44%, list=20%, signal=35%	5788/23529/59067/57829/6541/51293/7292/3596/975/970/3559/5747/684/4254/8767/2048/952/3071/3592/729230/942/3594/6504/683/100/958/54106/1438/4352/3133/4067/959/1436/29108/26191/84433/916/79679/6850/9466/54440/596/57181/3600/199/7293/3105/6352/940/3113/4208/6188/3109/923/5595/11151/3115/301/3965/7535/100133941/972/6363/8440/10673
MF	GO:0051539	4 iron, 4 sulfur cluster binding	38	0.668013	2.57492	1.24253e-08	8.53749e-07	6.33656e-07	3255	tags=53%, list=13%, signal=46%	1763/2110/4337/1806/6059/4720/5558/4719/4913/80224/83990/5471/6390/5426/5980/55140/122961/55253/374291/27247
BP	GO:0051271	negative regulation of cellular component movement	259	-0.381798	-1.95751	1.30524e-08	8.89041e-07	6.5985e-07	4703	tags=34%, list=19%, signal=28%	8434/10076/23598/5728/6833/2697/1545/7075/5314/5912/328/1524/5734/5911/684/2041/161742/79148/55466/3728/91862/6672/274/6376/1800/3488/11188/1265/5797/653/22846/1460/6347/100/387/657/134/2841/1495/23213/11314/2768/79890/9270/2192/3486/7168/56833/347/5300/7076/57175/8519/51466/393/2022/7454/89795/8751/9466/5879/4286/596/6387/7026/199/4070/182/1281/56477/2796/57522/84034/4681/4208/397/7070/11117/180…
BP	GO:0000959	mitochondrial RNA metabolic process	37	0.666889	2.55734	1.35537e-08	9.15226e-07	6.79285e-07	4649	tags=62%, list=18%, signal=51%	64216/80324/6832/5562/124454/201626/55157/60528/87178/54802/2926/57505/3028/22868/10128/133522/6182/60493/80222/7019/79072/10922/9238
BP	GO:0002263	cell activation involved in immune response	267	-0.369435	-1.89424	1.50459e-08	1.0073e-06	7.47623e-07	5623	tags=43%, list=22%, signal=34%	3123/2067/5729/9655/28514/640/10875/7040/6338/7248/5788/23529/1015/2624/2207/59067/10538/90342/3936/4818/7157/5724/7292/25/2241/1524/5734/3596/911/84695/3662/4064/975/6814/5971/4292/8320/3446/8767/6688/55619/139818/7158/3683/26022/3071/729230/114548/942/3594/6504/100/3684/958/6810/4242/5914/867/3955/4063/6812/4067/1794/959/695/3445/11314/3958/3916/27040/10125/6284/7462/3689/930/29108/6813/5450/52…
BP	GO:0050920	regulation of chemotaxis	198	-0.410296	-2.03243	1.68226e-08	1.11671e-06	8.28823e-07	4502	tags=37%, list=18%, signal=31%	9037/9723/1524/7869/56920/5025/10500/5747/3315/79148/7423/6688/1907/3071/3592/729230/6504/2621/683/6347/6810/57402/2841/51157/5228/55558/4067/1906/1436/9647/79890/3603/25865/7114/5764/56833/347733/57175/5879/10505/1235/6387/199/64094/3627/54209/3673/10344/64218/6352/10507/23075/4681/83700/63940/5595/7852/3965/5156/846/7424/9353/5155/27347/5587/2152/5880/5159/80310/972/6363/1236/4192/6366
BP	GO:0002366	leukocyte activation involved in immune response	264	-0.376844	-1.93351	1.87481e-08	1.22109e-06	9.06294e-07	5623	tags=44%, list=22%, signal=34%	3123/2067/5729/9655/28514/640/10875/7040/6338/7248/5788/23529/1015/2624/2207/59067/10538/90342/3936/4818/7157/5724/7292/25/2241/1524/5734/3596/911/84695/3662/4064/975/6814/5971/4292/8320/3446/8767/6688/55619/139818/7158/3683/26022/3071/729230/114548/942/3594/6504/100/3684/958/6810/4242/5914/867/3955/4063/6812/4067/1794/959/695/3445/11314/3958/3916/27040/10125/6284/7462/3689/930/29108/6813/5450/52…
BP	GO:0006753	nucleoside phosphate metabolic process	411	0.319225	1.80592	1.88627e-08	1.22109e-06	9.06294e-07	5192	tags=35%, list=21%, signal=28%	6999/8942/3295/2819/51703/51422/64087/132/5631/6296/441024/55312/221823/5167/2180/8564/9414/2584/4522/5164/10135/51166/5562/6095/1806/38/79646/5151/2981/2203/10924/8460/2027/2618/8459/2639/1723/351/53354/55526/10165/23475/4913/84649/5471/32/1807/5224/80347/9611/5465/570/3479/6470/22978/53632/6799/229/5236/125061/10891/203/65220/5169/10157/3939/5198/7415/9626/10965/51071/51085/3158/4833/55022/5027…
CC	GO:0015629	actin cytoskeleton	445	-0.326008	-1.77456	1.86841e-08	1.22109e-06	9.06294e-07	5265	tags=35%, list=21%, signal=28%	246176/89/10211/8573/4703/7248/91663/7134/92241/84176/3936/9124/26037/23307/55761/55166/9262/10092/200539/10552/25/85477/2241/79642/10602/4629/23586/101/822/4650/10093/60/60312/7791/2314/10097/27129/4046/10518/3183/2011/5747/7739/10411/6622/64098/7625/4026/3728/140465/11344/27295/4921/130271/274/55607/8826/6709/4637/1265/9260/4627/9696/3611/51474/342527/71/1266/3996/5914/28988/50853/11258/4644/39…
BP	GO:0031589	cell-substrate adhesion	332	-0.353449	-1.86354	2.34567e-08	1.50604e-06	1.11779e-06	5373	tags=39%, list=21%, signal=31%	1012/1021/10562/89/63923/8573/54828/7248/91663/10519/285613/3687/59339/5728/54749/10174/6789/9723/5314/8324/25/2241/3674/81792/7791/8516/5747/4739/55920/2041/1295/64098/3693/3678/3728/158326/27076/1613/3676/3683/6376/1305/10630/3680/5786/57580/3611/2621/683/255743/3684/71/387/1601/3655/8515/3685/83706/9404/7016/9647/5613/7301/54453/3675/5328/3689/3695/9270/7205/2192/6548/151887/6714/2049/347/916/…
BP	GO:2000146	negative regulation of cell motility	251	-0.382595	-1.95147	2.47386e-08	1.57543e-06	1.16929e-06	4703	tags=34%, list=19%, signal=28%	8434/10076/23598/5728/6833/2697/1545/7075/5912/328/1524/5734/5911/684/2041/161742/79148/55466/3728/91862/6672/6376/1800/3488/11188/1265/5797/653/22846/1460/6347/100/387/657/134/2841/1495/23213/11314/2768/79890/9270/2192/3486/7168/56833/347/5300/7076/57175/8519/51466/393/2022/7454/89795/8751/9466/5879/4286/596/6387/7026/199/4070/182/1281/56477/2796/57522/84034/4681/4208/397/7070/11117/1809/9353/54…
BP	GO:0002687	positive regulation of leukocyte migration	132	-0.467004	-2.21528	2.56468e-08	1.62009e-06	1.20244e-06	4312	tags=43%, list=17%, signal=36%	1524/81704/101/5025/5747/6369/4254/7423/6688/58494/3676/6376/1907/3071/6403/3592/729230/6504/2621/387/57402/51157/5228/4267/2526/1906/1436/3958/8764/29108/8784/5764/5879/961/1235/6387/199/3627/54209/3673/6352/23075/7070/83700/63940/5595/3965/7424/27347/5880/80310/972/6363/83483/1236/4192/6366
BP	GO:0070663	regulation of leukocyte proliferation	235	-0.390049	-1.98218	2.64017e-08	1.65443e-06	1.22793e-06	4485	tags=35%, list=18%, signal=29%	51293/7292/384/3596/975/970/3559/5747/684/4254/8767/2048/8654/952/6441/3071/1178/3592/729230/942/3594/6504/683/944/100/958/54106/1438/4352/3133/4067/959/1436/695/11314/3958/8764/57045/29108/26191/84433/10457/652/7305/5585/916/79679/6850/9466/54440/596/57181/3600/199/2064/7293/1493/3105/6352/940/11035/3113/4208/2615/6188/3109/923/5595/3635/11151/3115/301/3965/7535/5777/27242/5880/100133941/2950/97…
BP	GO:0050671	positive regulation of lymphocyte proliferation	135	-0.450644	-2.1472	2.71651e-08	1.68877e-06	1.25341e-06	5149	tags=43%, list=20%, signal=34%	5788/23529/59067/57829/6541/51293/7292/3596/975/970/3559/8767/2048/952/3071/3592/729230/942/3594/6504/683/100/958/54106/4352/3133/959/29108/26191/84433/916/79679/6850/9466/54440/596/57181/3600/199/7293/3105/6352/940/3113/4208/6188/3109/923/11151/3115/301/3965/7535/100133941/972/6363/8440/10673
CC	GO:0015935	small ribosomal subunit	65	-0.56487	-2.36727	3.17762e-08	1.95987e-06	1.45462e-06	4016	tags=51%, list=16%, signal=43%	3040/51065/6201/6231/6224/6203/6235/51373/6189/3921/6208/6191/9636/6209/6233/6218/6217/6232/54460/6230/6222/6207/6204/6193/6206/6210/6227/6223/6194/6188/6187/6205/8705
CC	GO:0019866	organelle inner membrane	415	0.313117	1.77151	4.17104e-08	2.55248e-06	1.89446e-06	6217	tags=38%, list=25%, signal=29%	23530/23788/94081/64969/441024/3329/788/84129/9801/4718/9131/284439/2110/3052/1327/51253/4720/6687/4719/54148/22/27069/79751/666/58510/1723/51021/131118/10165/10845/80273/622/10469/1468/1191/51805/9512/6390/4653/3030/1373/94097/25994/23439/23200/291/55210/92259/64983/129807/57129/1543/2628/6391/4833/10131/23464/51103/147991/55735/5027/10269/3954/60558/3313/51312/10884/7385/51642/8402/4706/84274/5…
BP	GO:0033865	nucleoside bisphosphate metabolic process	113	0.460714	2.20162	4.54752e-08	2.71914e-06	2.01816e-06	5184	tags=49%, list=21%, signal=39%	6999/3295/51703/64087/6296/5167/2180/5164/51166/38/79646/8460/8459/2639/53354/84649/32/80347/570/6799/10157/10965/3158/54995/54988/84693/6817/123876/445329/8034/8803/10380/54677/79071/10249/51000/23305/27284/4967/79877/6783/6822/348158/197322/51268/8801/5162/134526/8050/23181/23417/1738/5161/6818/10861
BP	GO:0033875	ribonucleoside bisphosphate metabolic process	113	0.460714	2.20162	4.54752e-08	2.71914e-06	2.01816e-06	5184	tags=49%, list=21%, signal=39%	6999/3295/51703/64087/6296/5167/2180/5164/51166/38/79646/8460/8459/2639/53354/84649/32/80347/570/6799/10157/10965/3158/54995/54988/84693/6817/123876/445329/8034/8803/10380/54677/79071/10249/51000/23305/27284/4967/79877/6783/6822/348158/197322/51268/8801/5162/134526/8050/23181/23417/1738/5161/6818/10861
BP	GO:0034032	purine nucleoside bisphosphate metabolic process	113	0.460714	2.20162	4.54752e-08	2.71914e-06	2.01816e-06	5184	tags=49%, list=21%, signal=39%	6999/3295/51703/64087/6296/5167/2180/5164/51166/38/79646/8460/8459/2639/53354/84649/32/80347/570/6799/10157/10965/3158/54995/54988/84693/6817/123876/445329/8034/8803/10380/54677/79071/10249/51000/23305/27284/4967/79877/6783/6822/348158/197322/51268/8801/5162/134526/8050/23181/23417/1738/5161/6818/10861
BP	GO:0050852	T cell receptor signaling pathway	115	-0.470289	-2.17382	5.42576e-08	3.2197e-06	2.38967e-06	4162	tags=41%, list=17%, signal=34%	3125/975/11119/3265/8767/3119/11120/10666/3932/100/919/50852/11118/79908/11314/3958/10616/55072/23149/121665/7805/25865/29085/26191/84433/5293/79679/10657/84174/79037/1493/3105/5335/940/5144/7070/925/6188/4068/3635/3115/3702/7535/5777/27242/784/1236
BP	GO:0002443	leukocyte mediated immunity	351	-0.34189	-1.81819	6.38616e-08	3.76111e-06	2.79151e-06	5225	tags=39%, list=21%, signal=32%	7040/733/6338/5788/23529/2624/2207/59067/10538/3004/11334/3118/10384/3135/3117/4818/5724/7292/2241/1524/23586/51311/3596/3821/911/3811/3125/2208/975/970/6814/4292/3120/2209/684/7098/1512/100507436/3119/6688/567/7158/1621/5551/10666/3071/1178/3592/729230/114548/910/3594/6504/3684/958/6810/712/50615/3140/11118/909/1511/867/3133/6812/127544/7186/4067/959/695/11314/3916/64170/27040/9437/10125/6284/10…
BP	GO:0050853	B cell receptor signaling pathway	50	-0.61362	-2.43053	6.51682e-08	3.80529e-06	2.8243e-06	4410	tags=62%, list=18%, signal=51%	25/931/975/974/952/3071/3932/89857/55024/4067/695/11314/9404/7462/930/26191/5293/5583/581/2874/6850/3543/596/57181/1493/23228/4208/123920/973/3702/5777
MF	GO:0050839	cell adhesion molecule binding	493	-0.313822	-1.72253	6.55834e-08	3.80529e-06	2.8243e-06	4420	tags=30%, list=18%, signal=26%	22905/2241/51100/3674/9379/1936/27134/101/822/2208/975/10518/5025/55898/8516/2011/5747/5499/3693/1006/22829/143098/3678/6231/3326/6286/7458/3728/58494/84033/6138/11344/3676/8407/10397/3683/10666/6376/2010/392/8745/3680/4478/8826/10755/6709/11188/1265/5797/4627/6130/2194/9133/7534/10006/51474/255743/3684/1266/7103/3655/9793/28988/8515/867/3927/3909/3685/4067/1627/959/23022/83706/1495/226/3646/3921…
MF	GO:0005178	integrin binding	146	-0.439158	-2.11299	7.23746e-08	4.16845e-06	3.09384e-06	4155	tags=40%, list=17%, signal=33%	2208/975/10518/8516/5747/3693/3678/58494/3676/3683/10666/6376/8745/3680/11188/4627/255743/3684/7103/3655/8515/3909/3685/4067/959/83706/3675/9636/3689/3695/9270/2192/6714/1285/5764/10457/977/6850/10516/8751/55612/7450/1289/6387/1307/3673/6696/1281/81/7070/2191/3912/11117/83700/3691/4240/846/8425
BP	GO:0032271	regulation of protein polymerization	171	-0.418586	-2.04314	7.33399e-08	4.19322e-06	3.11223e-06	4464	tags=39%, list=18%, signal=32%	9873/10092/10552/25/85477/2241/859/10602/822/10093/2314/6369/54434/79822/6622/11344/80206/80115/51199/274/28964/2006/3071/6709/4133/387/9793/28988/50853/1627/5058/2934/120/5216/10095/29108/403/7114/90952/4131/3925/51466/89795/5580/4926/5879/10094/402/118/11078/10344/10109/64857/6188/3059/11151/148170/9353/9168/23580/11075/8440/1236/6366/54961/25999
BP	GO:1902652	secondary alcohol metabolic process	136	0.434643	2.13766	7.87466e-08	4.46973e-06	3.31745e-06	6374	tags=48%, list=25%, signal=36%	1071/1595/4041/338/255738/19/51360/5562/319/6647/5444/1544/3931/3990/351/6770/23780/847/84649/2230/11160/10613/51302/116519/54659/1066/10449/3158/3422/33/3418/6718/3949/1576/5447/27329/4047/6256/8542/37/3419/6822/1585/54657/2330/23461/3930/1581/335/8435/10682/1559/8578/10858/3069/3156/10948/50814/336/3952/64137/3565/23541/2053/1593
BP	GO:0032946	positive regulation of mononuclear cell proliferation	137	-0.442305	-2.11576	9.39678e-08	5.29532e-06	3.93021e-06	5149	tags=42%, list=20%, signal=34%	5788/23529/59067/57829/6541/51293/7292/3596/975/970/3559/8767/2048/952/3071/3592/729230/942/3594/6504/683/100/958/54106/4352/3133/959/29108/26191/84433/916/79679/6850/9466/54440/596/57181/3600/199/7293/3105/6352/940/3113/4208/6188/3109/923/11151/3115/301/3965/7535/100133941/972/6363/8440/10673
BP	GO:0009072	aromatic amino acid family metabolic process	28	0.709586	2.52736	9.5965e-08	5.36924e-06	3.98507e-06	4577	tags=71%, list=18%, signal=58%	6999/8942/5053/143941/8564/84105/389434/3081/5860/2954/2639/125061/5092/1638/84842/2184/23498/130013/121278/11315
BP	GO:0008154	actin polymerization or depolymerization	169	-0.416497	-2.02944	1.06334e-07	5.90718e-06	4.38433e-06	4731	tags=40%, list=19%, signal=32%	9873/55761/10092/9037/10552/25/85477/2241/10602/822/10093/2314/6369/54434/79822/11344/80206/130271/80115/274/2006/3071/6709/57580/10006/51474/387/28988/50853/1627/10152/2934/79585/120/9051/5216/10095/29108/7114/90952/51466/7454/5580/5879/6387/10094/51738/118/199/1072/11078/10344/10109/23075/64857/3059/79778/11151/64780/148170/9353/9168/23580/8440/1236/6366/54961
BP	GO:0045333	cellular respiration	167	0.398665	2.03485	1.07254e-07	5.91636e-06	4.39115e-06	5294	tags=37%, list=21%, signal=30%	664/23530/2819/3416/2271/3454/4718/2110/2395/1327/4191/201626/4720/4719/1544/27069/79751/10105/55526/847/10165/87178/6390/10891/7124/92259/7415/6391/51085/10131/51103/9650/3418/2109/7385/55753/4706/83733/6392/8803/54205/374291/6472/4702/5290/6389/4729/3419/4967/2108/4731/7381/4609/4707/80219/8801/11315/5162/1738/5161/79085/84275
BP	GO:0006066	alcohol metabolic process	319	0.326336	1.79066	1.09534e-07	5.99987e-06	4.45313e-06	5853	tags=39%, list=23%, signal=31%	1071/2819/1595/4041/338/2643/255738/9562/2584/19/51360/5562/84105/319/6647/5860/6652/5444/3612/1544/3931/81537/3990/351/6770/23780/126/847/84649/54363/2230/11160/10613/3479/6799/51805/51302/1562/116519/217/54659/1719/10901/1066/84869/10449/5805/6697/1543/3158/3422/5092/33/130/3418/6817/6718/8228/5105/3949/128/1576/445329/8912/1558/11163/6526/55825/10380/125/5447/116255/3628/8608/27329/4047/6256/8…
BP	GO:0110053	regulation of actin filament organization	227	-0.37956	-1.92344	1.14469e-07	6.22665e-06	4.62145e-06	4505	tags=37%, list=18%, signal=30%	10174/9037/10552/25/85477/2241/10602/5734/822/10093/2314/6369/54434/79822/2041/10411/11344/5999/80206/130271/80115/274/6376/2006/3071/6709/51474/71/387/28988/50853/22899/1627/10152/5058/2934/171024/7016/9647/120/5216/10095/29108/9270/389/6548/7114/7168/9535/90952/57175/3925/51466/7454/23370/10163/5580/5879/961/6387/10094/118/6281/4070/1902/11078/10344/29109/10109/23075/64857/9639/3059/11151/14817…
MF	GO:0051536	iron-sulfur cluster binding	58	0.561121	2.36651	1.22197e-07	6.51136e-06	4.83276e-06	3544	tags=47%, list=14%, signal=40%	316/1763/18/51022/2110/2395/4337/1806/6059/4720/5558/4719/51218/4913/80224/83990/5471/2230/6390/5426/5980/55140/122961/55253/374291/27247/4729
MF	GO:0051540	metal cluster binding	58	0.561121	2.36651	1.22197e-07	6.51136e-06	4.83276e-06	3544	tags=47%, list=14%, signal=40%	316/1763/18/51022/2110/2395/4337/1806/6059/4720/5558/4719/51218/4913/80224/83990/5471/2230/6390/5426/5980/55140/122961/55253/374291/27247/4729
BP	GO:0032835	glomerulus development	65	-0.549122	-2.30128	1.20757e-07	6.51136e-06	4.83276e-06	2100	tags=42%, list=8%, signal=38%	59/23213/1286/2296/1285/652/284/4854/596/4358/51196/1910/182/25937/5420/5175/4208/26508/5156/1909/5155/6943/5159/100133941/80310/947/8842
MF	GO:0019838	growth factor binding	126	-0.44381	-2.08958	1.25301e-07	6.63164e-06	4.92203e-06	2879	tags=33%, list=11%, signal=29%	124857/3488/5154/3655/51232/3685/2263/3561/27286/3587/6284/57045/114990/3486/199713/2734/64285/2022/1277/1282/1291/85409/1289/2064/9365/1281/79651/6223/2615/6187/3691/1278/3490/5156/8425/5155/5159/2261/6272/3489/81621
BP	GO:0042113	B cell activation	240	-0.373535	-1.90423	1.27669e-07	6.71162e-06	4.98139e-06	5616	tags=41%, list=22%, signal=32%	11331/2067/28514/640/115352/2322/7040/5788/23529/1015/59067/10538/56262/51341/7128/7157/51293/7292/25/931/3596/4064/975/970/4292/684/974/3446/64092/2048/643/6688/55619/139818/7158/952/3676/3071/942/6929/683/100/958/4242/54106/3955/55024/4067/959/695/3445/11314/10125/7462/3589/10312/7805/930/4066/5450/84433/56833/5293/7305/5585/581/2874/6850/54900/5580/9466/54440/3543/1235/596/57181/7293/1493/3001…
CC	GO:0098798	mitochondrial protein-containing complex	210	0.372175	1.95307	1.32982e-07	6.94431e-06	5.1541e-06	6734	tags=42%, list=27%, signal=31%	64087/64969/594/6832/9801/4718/5164/1327/51253/4720/6687/4719/54148/10105/51021/131118/87178/10845/80273/593/6390/3030/291/92259/64983/57129/6391/3028/51103/55735/3313/10884/7385/51642/4706/55173/6392/134266/5428/55669/374291/55572/1629/64960/4702/4580/6182/6389/4729/3419/100287932/139322/4731/28957/7381/11222/1678/29093/79590/4707/8801/60488/5162/3032/116540/10939/8050/1738/1349/64968/56945/2652…
BP	GO:0140053	mitochondrial gene expression	81	0.50692	2.2905	1.3455e-07	6.97965e-06	5.18033e-06	6212	tags=52%, list=25%, signal=39%	64216/85476/80324/6832/26995/5562/124454/54516/55157/60528/51021/84340/87178/54802/10102/57129/57505/3028/4528/55699/22868/10128/133522/283459/6472/64960/6182/60493/92170/80222/7019/79072/28957/10922/9238/64968/84275/23395/51081/6150/63931/51069
BP	GO:0008203	cholesterol metabolic process	126	0.437065	2.12264	1.39356e-07	7.18144e-06	5.33009e-06	6374	tags=48%, list=25%, signal=36%	1071/1595/4041/338/255738/19/51360/5562/319/6647/5444/1544/3931/3990/351/6770/23780/847/84649/2230/11160/10613/51302/116519/1066/10449/3158/3422/33/6718/3949/1576/5447/27329/4047/6256/8542/37/6822/1585/2330/23461/3930/1581/335/8435/10682/1559/8578/10858/3069/3156/10948/50814/336/3952/64137/3565/23541/2053/1593
BP	GO:0051480	regulation of cytosolic calcium ion concentration	313	-0.348198	-1.82384	1.40796e-07	7.20821e-06	5.34996e-06	5752	tags=38%, list=23%, signal=30%	2534/6261/9002/5026/5729/5023/2843/2280/805/624/146/51024/5788/9187/2624/8811/2587/778/5028/3357/2828/858/781/7474/845/25/116/859/387129/1524/5737/931/5734/3596/10518/5025/2859/2905/6622/5031/4828/643/2359/22821/2281/5739/952/6376/1907/2846/3932/287/729230/162514/6373/5021/10800/6863/134/808/2841/8996/126306/3741/553/3685/4067/1906/2769/10134/121665/930/255231/5731/1193/55503/55283/111/3270/581/6…
BP	GO:0030031	cell projection assembly	413	-0.325353	-1.76258	1.47058e-07	7.47993e-06	5.55163e-06	6663	tags=41%, list=26%, signal=30%	84260/2302/23322/57096/4218/26499/1785/2017/84100/161514/4651/23500/54443/154865/285331/51225/55742/10435/23386/3688/7414/25876/84314/10464/84074/26005/10451/79734/1769/7419/22919/56171/1639/115704/2012/5991/1464/585/1012/197335/54828/79867/5898/353116/1952/5365/51715/84062/79902/55036/85478/55835/5314/25/57381/85477/2241/10602/387707/51382/55212/822/5911/2596/79738/10097/583/136332/55920/55081/2…
BP	GO:0030199	collagen fibril organization	55	-0.58493	-2.35954	1.48207e-07	7.48973e-06	5.55891e-06	4526	tags=49%, list=18%, signal=40%	1545/81792/84695/84171/4921/1305/11173/4320/1303/2296/1290/9509/1277/10491/7042/1289/1281/4060/1805/11117/1278/2331/7373/30008/4016/871/165
BP	GO:0051495	positive regulation of cytoskeleton organization	173	-0.407806	-1.99219	1.57629e-07	7.91477e-06	5.87438e-06	4546	tags=38%, list=18%, signal=31%	55835/10174/9037/25/85477/2241/859/10602/6369/2041/10411/3265/29899/80115/51199/274/28964/6376/3071/10300/387/9793/55558/22899/10152/5058/2934/171024/1906/7016/9647/5216/29108/23636/9270/389/403/7168/4131/51466/7454/89795/10163/4926/5879/961/402/6281/1902/10344/29109/10109/23075/10763/9639/6188/3059/10733/148170/54361/23580/11075/8440/1236/6366
BP	GO:0006805	xenobiotic metabolic process	105	0.454572	2.12979	1.724e-07	8.60134e-06	6.38395e-06	5144	tags=49%, list=20%, signal=39%	3172/196/10/316/2180/1592/6095/5446/1544/1573/2940/6799/1557/30/1562/6283/54659/8856/1543/314/6817/13/23491/1576/445329/7172/1558/1572/2939/55270/5447/221357/1555/10249/27284/6822/348158/54657/2330/79001/2329/10720/1577/54577/134147/1571/1559/66002/6097/10858/6818
MF	GO:0048407	platelet-derived growth factor binding	11	-0.877677	-2.29418	1.86504e-07	9.20832e-06	6.83445e-06	2691	tags=91%, list=11%, signal=81%	5154/1277/1282/1291/1289/1281/1278/5156/5155/5159
BP	GO:0034660	ncRNA metabolic process	408	0.302268	1.70815	1.86917e-07	9.20832e-06	6.83445e-06	4704	tags=31%, list=19%, signal=26%	54517/25896/51091/127253/55272/285605/55520/23405/64216/80324/1956/57418/57176/124454/79731/8737/54663/55157/25926/60528/23404/23160/8780/84172/84128/87178/26173/221078/54802/5073/10885/10199/10557/84267/339175/9611/54888/2926/2099/51202/10785/23246/9188/7124/65083/57647/150962/140432/23076/57505/3028/80746/56342/10179/57050/57510/55699/55140/8178/22936/23369/55174/10269/153443/64172/79954/705/16…
BP	GO:0090130	tissue migration	282	-0.348848	-1.80895	2.03696e-07	9.97217e-06	7.40139e-06	4662	tags=33%, list=19%, signal=27%	7474/23598/5728/10016/1545/9037/25/57381/9839/3640/4318/29941/23129/5025/5747/3315/1512/5646/161742/55466/6286/1839/3728/91862/6672/1907/10755/5797/22846/4627/1460/6776/958/387/51157/147372/3164/2821/59/8766/1906/27286/9404/7016/9647/5613/54453/3675/5216/2113/25865/9270/11156/6714/7114/5764/5293/652/5585/57175/51466/284/55612/5879/7042/7026/79977/4070/5168/64094/54345/306/3673/64218/5335/25959/42…
BP	GO:0045765	regulation of angiogenesis	247	-0.36815	-1.8728	2.23614e-07	1.08793e-05	8.07465e-06	4737	tags=36%, list=19%, signal=30%	11005/2828/7128/8434/3135/7474/10016/51548/6833/1545/7075/9037/9723/22905/25/57381/1524/84432/23129/6369/7098/2041/10411/3315/1512/2549/161742/7423/3678/3728/6672/729230/10553/3339/5797/22846/10800/958/3082/5228/6019/5740/8877/147372/9510/23213/694/3202/2113/25865/2296/79805/79031/26051/1285/5293/7058/10457/10365/2022/7042/51738/55810/2064/6558/5168/64094/3627/306/64218/5335/1284/84034/1870/11117…
BP	GO:0045580	regulation of T cell differentiation	140	-0.427331	-2.04704	2.32701e-07	1.12515e-05	8.35091e-06	4737	tags=38%, list=19%, signal=31%	11005/3135/7292/25/57864/84695/3662/101/3559/2737/399/8767/8546/56339/3071/729230/114548/942/3594/100/387/5914/9760/3707/57178/10125/639/864/84433/652/6850/54440/2736/3600/257101/6659/2177/2064/1493/940/939/3122/914/301/3965/4602/7535/972/6363/3111/3575/51176/4192
BP	GO:0071887	leukocyte apoptotic process	102	-0.475171	-2.16318	2.50907e-07	1.20191e-05	8.92066e-06	4662	tags=43%, list=19%, signal=35%	7474/5728/7157/57864/384/81704/101/3559/2737/4254/842/5133/1178/2621/100/4067/695/3707/3958/10945/5293/652/5585/581/6387/57181/1831/6352/11035/1029/939/4208/6194/3059/301/3965/27242/972/6363/84941/3575/917/1236/6366
BP	GO:0006163	purine nucleotide metabolic process	332	0.318073	1.75758	2.51646e-07	1.20191e-05	8.92066e-06	5192	tags=36%, list=21%, signal=29%	6999/3295/2819/51703/51422/64087/132/5631/6296/441024/221823/5167/2180/9414/2584/4522/5164/51166/5562/6095/38/79646/5151/2981/2203/8460/2027/2618/8459/2639/351/53354/55526/10165/84649/5471/32/5224/80347/9611/5465/570/3479/22978/53632/6799/229/5236/10891/203/10157/3939/5198/7415/9626/10965/51085/3158/4833/55022/5027/5313/54995/5208/54988/84693/6817/3101/123876/107/445329/55753/9567/8034/6774/11163…
BP	GO:1901342	regulation of vasculature development	251	-0.367934	-1.87669	2.54866e-07	1.20992e-05	8.98005e-06	4737	tags=36%, list=19%, signal=29%	11005/2828/7128/8434/3135/7474/10016/51548/6833/1545/7075/9037/9723/22905/25/57381/1524/84432/23129/6369/7098/2041/10411/3315/1512/2549/161742/7423/3678/3728/6672/729230/10553/3339/5797/22846/10800/958/3082/5228/6019/5740/8877/147372/9510/23213/694/3202/2113/25865/2296/79805/79031/26051/1285/5293/7058/10457/10365/2022/7042/51738/55810/2064/6558/5168/64094/3627/306/64218/5335/1284/84034/1870/11117…
BP	GO:0030336	negative regulation of cell migration	239	-0.371872	-1.89379	2.59953e-07	1.22663e-05	9.10413e-06	4798	tags=34%, list=19%, signal=28%	10371/8434/10076/23598/5728/6833/2697/1545/7075/5912/328/1524/5734/5911/684/2041/161742/79148/55466/3728/91862/6672/6376/1800/3488/11188/1265/5797/653/22846/1460/6347/100/387/657/134/2841/23213/11314/2768/79890/9270/3486/7168/56833/347/7076/57175/8519/51466/393/2022/89795/8751/9466/5879/4286/596/6387/7026/199/4070/182/1281/56477/2796/57522/84034/4681/4208/397/7070/11117/1809/9353/54361/972/1634/6…
BP	GO:1903706	regulation of hemopoiesis	320	-0.338077	-1.78079	2.86659e-07	1.34455e-05	9.97931e-06	4458	tags=30%, list=18%, signal=25%	7292/25/85477/57864/3692/56834/84695/3662/101/3559/2737/7098/3276/399/4254/8767/8546/6688/56339/567/5457/3071/729230/114548/942/3594/2621/9770/100/387/7564/5914/54106/22985/51621/4352/4067/9760/695/3707/3202/57178/10125/639/2113/9636/60682/864/5764/84433/56833/652/10766/7305/4920/6850/54440/4286/2736/10234/3600/257101/6659/2177/2064/2124/54209/182/1493/140685/940/939/4208/3122/3059/8111/914/3635/…
BP	GO:0042180	cellular ketone metabolic process	188	0.375278	1.9312	2.99368e-07	1.3958e-05	1.03597e-05	5366	tags=41%, list=21%, signal=33%	6999/8942/83752/2819/51422/57834/6777/8564/5164/4051/51166/552/64577/6770/84649/32/2739/9611/5465/11160/10613/2806/551/51805/125061/116519/10891/6716/10901/1066/84869/8630/3028/51085/2693/5581/33/154807/84274/5629/8912/6715/3293/29914/51004/3029/50487/672/57107/1555/634/37/1585/1586/79001/2695/130013/23590/4836/127/1581/80219/157506/335/9563/11315/208/1374/23417/134429/66002/1958/133/10858/25953/…
BP	GO:0072521	purine-containing compound metabolic process	348	0.322915	1.79886	3.03469e-07	1.40655e-05	1.04395e-05	5192	tags=36%, list=21%, signal=29%	6999/3295/2819/51703/51422/64087/132/5631/6296/441024/221823/5167/2180/9414/2584/4522/5164/51166/5562/6095/1806/38/79646/5151/2981/2203/8460/2027/2618/8459/2639/351/53354/55526/10165/84649/5471/32/5224/80347/9611/5465/570/3479/6470/22978/53632/6799/229/5236/10891/203/10157/3939/5198/7415/9626/10965/4507/51085/3158/4833/55022/5027/5313/54995/5208/54988/84693/6817/3101/123876/107/445329/55753/9567/…
BP	GO:0050854	regulation of antigen receptor-mediated signaling pathway	55	-0.574475	-2.31737	3.20646e-07	1.47742e-05	1.09655e-05	3129	tags=47%, list=12%, signal=41%	10666/3932/100/50852/4067/11314/3958/9404/7805/25865/930/29085/26191/84433/5583/2874/84174/79037/57181/23228/7070/6188/4068/123920/5777/1236
MF	GO:0016627	oxidoreductase activity, acting on the CH-CH group of donors	52	0.576682	2.37481	3.35005e-07	1.53456e-05	1.13895e-05	4595	tags=54%, list=18%, signal=44%	36/35/34/84129/645/1806/51/27034/2639/1723/30/6390/6716/6391/33/6718/26063/80724/6715/1666/55825/6389/8309/37/1384/27294/3930/54884
BP	GO:0051258	protein polymerization	236	-0.369026	-1.87757	3.47748e-07	1.58367e-05	1.17541e-05	4731	tags=35%, list=19%, signal=28%	9873/55761/10092/845/55835/10552/25/85477/2241/859/10602/822/10093/2314/6369/54434/79822/6622/11344/80206/80115/51199/274/28964/2006/3071/7756/22954/6709/11065/57580/4133/387/54820/9793/29082/28988/50853/1627/5058/2934/79585/120/9051/5216/10095/29108/403/7114/90952/4131/3925/117854/51466/7454/89795/5580/4926/5879/10094/402/118/199/11078/10344/27175/10109/64857/6188/3059/79778/11151/148170/9353/91…
BP	GO:0061687	detoxification of inorganic compound	16	0.795518	2.43213	4.79322e-07	2.15809e-05	1.60175e-05	2520	tags=69%, list=10%, signal=62%	7779/4489/4499/4501/4493/4495/4496/4494/847/4490/4502
BP	GO:0019884	antigen processing and presentation of exogenous antigen	43	-0.61674	-2.36102	4.79393e-07	2.15809e-05	1.60175e-05	5652	tags=72%, list=22%, signal=56%	5641/8943/3123/2207/3118/3117/911/3125/3120/8546/3119/567/910/3140/909/50856/3133/913/1509/6890/3105/3112/3113/3122/3109/5720/3108/3115/3134/972/3111
BP	GO:0016055	Wnt signaling pathway	397	-0.318394	-1.71839	5.25974e-07	2.35426e-05	1.74734e-05	5023	tags=38%, list=20%, signal=31%	63977/2255/7482/25876/153090/85407/6259/57658/25928/6422/9968/6478/4919/7480/8323/25806/7088/1951/219771/57680/63923/7040/284654/85458/6468/1952/283149/1749/5754/25805/7128/128272/8434/7474/10076/5728/8724/9037/8820/6789/7484/8324/25/9839/81029/387914/57674/259266/2931/2011/64359/5499/2737/9978/64321/65268/57326/607/8325/90780/2870/3728/1613/23043/7976/26524/6597/2010/3090/152573/4776/2254/1460/3…
BP	GO:0097530	granulocyte migration	139	-0.419365	-2.00879	5.30926e-07	2.36292e-05	1.75377e-05	5189	tags=42%, list=21%, signal=34%	4354/6278/2207/23396/5142/6361/6357/6374/5734/101/5747/6369/399/6367/6376/1907/3071/6362/3680/6373/57580/6504/683/6347/57402/4267/2526/1906/1436/11314/3958/2919/3689/255231/56833/5293/6850/5879/7042/4283/3627/10344/6352/51192/5175/6372/83700/5595/301/5294/682/9353/5880/972/6363/1236/4192/391/6366
BP	GO:0008064	regulation of actin polymerization or depolymerization	133	-0.42668	-2.02769	5.41262e-07	2.39532e-05	1.77781e-05	4731	tags=41%, list=19%, signal=33%	9873/10092/9037/10552/85477/2241/10602/822/10093/2314/6369/54434/79822/11344/80206/130271/80115/274/2006/3071/6709/51474/387/28988/50853/1627/2934/120/5216/10095/29108/7114/90952/51466/7454/5580/6387/10094/118/11078/10344/10109/23075/64857/3059/11151/148170/9353/9168/23580/8440/1236/6366/54961
BP	GO:0043254	regulation of protein-containing complex assembly	337	-0.332358	-1.75574	5.69167e-07	2.50465e-05	1.85896e-05	4464	tags=32%, list=18%, signal=27%	10552/57057/25/85477/2241/51100/859/10602/5734/4314/81857/822/2629/10093/147138/2314/79738/6369/54434/79822/6622/143098/10273/81620/638/11344/8115/5899/80206/80115/51199/274/28964/2006/3071/6403/4478/6709/4133/21/387/9793/28988/50853/55737/51339/6812/7186/1627/5058/2934/3958/120/7376/5216/10095/9636/29108/389/403/6714/7114/54751/90952/7067/581/4131/3925/51466/89795/6850/115362/5580/6804/4926/5561…
BP	GO:0198738	cell-cell signaling by wnt	399	-0.316669	-1.71068	5.96009e-07	2.60812e-05	1.93576e-05	5023	tags=38%, list=20%, signal=31%	63977/2255/7482/25876/153090/85407/6259/57658/25928/6422/9968/6478/4919/7480/8323/25806/7088/1951/219771/57680/63923/7040/284654/85458/6468/1952/283149/1749/5754/25805/7128/128272/8434/7474/10076/5728/8724/9037/8820/6789/7484/8324/25/9839/81029/387914/57674/259266/2931/2011/64359/5499/2737/9978/64321/65268/57326/607/8325/90780/2870/3728/1613/23043/7976/26524/6597/2010/3090/152573/4776/2254/1460/3…
BP	GO:0061564	axon development	448	-0.306592	-1.67147	6.02523e-07	2.62198e-05	1.94604e-05	5256	tags=31%, list=21%, signal=25%	63923/10211/9252/10494/57463/29882/84631/2290/85458/65078/5365/1749/26037/10371/4803/7474/4684/474/5728/9037/9723/885/25/5354/7869/60/56920/2596/23129/2044/285220/343472/10500/2011/5747/2737/2041/399/2048/3326/91653/3800/2281/5457/11344/3676/140578/7976/51199/1907/6586/4135/22954/3199/1123/5797/4133/55201/1400/3996/28988/90249/55558/3909/6812/2263/3918/1627/5058/8766/55118/1906/9201/26230/1436/23…
BP	GO:0030041	actin filament polymerization	143	-0.420608	-2.01305	6.24212e-07	2.70136e-05	2.00496e-05	4731	tags=40%, list=19%, signal=33%	9873/55761/10092/10552/25/85477/2241/10602/822/10093/2314/6369/54434/79822/11344/80206/80115/274/2006/3071/6709/57580/387/28988/50853/1627/2934/79585/120/9051/5216/10095/29108/7114/90952/51466/7454/5580/5879/10094/118/199/11078/10344/10109/64857/3059/79778/11151/148170/9353/9168/23580/8440/1236/6366/54961
BP	GO:0042129	regulation of T cell proliferation	161	-0.407595	-1.97176	6.84729e-07	2.94697e-05	2.18725e-05	3064	tags=30%, list=12%, signal=26%	6441/3071/1178/729230/942/3594/6504/944/3133/959/3958/8764/57045/29108/26191/84433/10457/652/916/79679/6850/9466/54440/3600/199/2064/1493/3105/6352/940/11035/3113/2615/6188/3109/923/11151/3115/301/3965/7535/5777/27242/5880/100133941/6363/8440/10673
BP	GO:0006544	glycine metabolic process	13	0.820111	2.30591	6.96263e-07	2.98023e-05	2.21194e-05	3734	tags=92%, list=15%, signal=79%	64902/2618/570/6470/1719/26227/23464/275/6472/189/10249/2731
BP	GO:0030832	regulation of actin filament length	134	-0.42305	-2.0094	7.05583e-07	3.00371e-05	2.22937e-05	4731	tags=40%, list=19%, signal=33%	9873/10092/9037/10552/85477/2241/10602/822/10093/2314/6369/54434/79822/11344/80206/130271/80115/274/2006/3071/6709/51474/387/28988/50853/1627/2934/120/5216/10095/29108/7114/90952/51466/7454/5580/6387/10094/118/11078/10344/10109/23075/64857/3059/11151/148170/9353/9168/23580/8440/1236/6366/54961
BP	GO:0014909	smooth muscle cell migration	64	-0.528823	-2.21349	7.27044e-07	3.07834e-05	2.28476e-05	2788	tags=41%, list=11%, signal=36%	3488/2254/5154/387/657/9510/2768/5328/3486/6714/7168/6282/57175/780/596/5361/199/3673/6352/4208/9353/5155/5159/80310/4192/5327
CC	GO:0070820	tertiary granule	149	-0.41725	-2.01225	7.7668e-07	3.27083e-05	2.42762e-05	5500	tags=47%, list=22%, signal=37%	966/124583/10562/10321/84443/23218/2207/138050/8972/3687/4057/81619/5724/6947/25797/5912/3043/170482/101/4318/6814/1476/4973/1512/5646/567/5799/6515/3071/6709/965/1265/3684/387/6843/28988/8655/22918/10394/6616/11322/79895/226/11314/3958/2919/3916/10312/5328/3689/23114/427/1471/6813/4069/1509/5269/5879/4048/961/3608/5768/8673/7077/1535/10159/51646/963/5777/374403
BP	GO:0010631	epithelial cell migration	275	-0.342628	-1.76748	7.8285e-07	3.27918e-05	2.43382e-05	4662	tags=33%, list=19%, signal=27%	7474/23598/5728/10016/1545/9037/25/57381/9839/3640/4318/29941/23129/5025/5747/3315/1512/5646/161742/55466/6286/1839/3728/91862/6672/1907/10755/5797/22846/4627/1460/6776/958/387/51157/147372/3164/2821/8766/1906/27286/9404/7016/9647/5613/54453/3675/5216/2113/25865/9270/11156/6714/7114/5764/5293/652/5585/57175/51466/284/55612/5879/7042/7026/4070/5168/64094/54345/306/3673/64218/5335/25959/4208/2191/1…
BP	GO:2000106	regulation of leukocyte apoptotic process	79	-0.495295	-2.16933	8.14906e-07	3.3953e-05	2.52e-05	4662	tags=46%, list=19%, signal=37%	7474/5728/7157/57864/384/81704/101/4254/5133/2621/100/4067/695/3707/3958/5293/652/581/6387/57181/1831/6352/11035/1029/939/4208/3059/301/3965/972/6363/84941/3575/917/1236/6366
BP	GO:0030833	regulation of actin filament polymerization	117	-0.440677	-2.04388	8.72474e-07	3.61139e-05	2.68039e-05	4731	tags=41%, list=19%, signal=33%	9873/10092/10552/85477/2241/10602/822/10093/2314/6369/54434/79822/11344/80206/80115/274/2006/3071/6709/387/28988/50853/1627/2934/120/5216/10095/29108/7114/90952/51466/5580/10094/118/11078/10344/10109/64857/3059/11151/148170/9353/9168/23580/8440/1236/6366/54961
MF	GO:0005342	organic acid transmembrane transporter activity	154	0.38978	1.94587	8.75991e-07	3.61139e-05	2.68039e-05	7382	tags=53%, list=29%, signal=38%	117247/94081/55089/6505/54407/120103/23428/948/375611/284111/9673/1244/79751/6573/10165/85320/113235/6582/55244/1468/9429/94097/10998/114571/256987/6567/159963/6529/6554/28234/246213/6520/6542/8402/9963/29015/83733/153129/118980/6506/9962/115111/11001/634/5172/1497/6579/10599/387700/124565/11136/8501/57709/4948/366/6534/253512/6566/8884/84068/54716/10861/8647/348932/83884/11254/10955/11309/201232…
MF	GO:0046943	carboxylic acid transmembrane transporter activity	153	0.394028	1.96685	9.54103e-07	3.91282e-05	2.90411e-05	7382	tags=54%, list=29%, signal=38%	117247/94081/55089/6505/54407/120103/23428/948/375611/284111/9673/1244/79751/6573/10165/85320/113235/6582/55244/1468/9429/94097/10998/114571/256987/6567/159963/6529/6554/28234/246213/6520/6542/8402/9963/29015/83733/153129/118980/6506/9962/115111/11001/634/5172/1497/6579/10599/387700/124565/11136/8501/57709/4948/366/6534/253512/6566/8884/84068/54716/10861/8647/348932/83884/11254/10955/11309/201232…
BP	GO:0046635	positive regulation of alpha-beta T cell activation	66	-0.531007	-2.23042	9.78662e-07	3.99264e-05	2.96335e-05	5866	tags=53%, list=23%, signal=41%	51561/8943/3123/9655/5788/7292/3125/975/2737/8767/8546/3071/3592/729230/114548/942/3594/100/387/5914/3133/3707/864/26191/916/6850/54440/3105/940/3122/301/3965/4602/7535/6363
BP	GO:0019693	ribose phosphate metabolic process	335	0.314448	1.7396	9.93313e-07	4.03141e-05	2.99213e-05	5192	tags=36%, list=21%, signal=29%	6999/3295/2819/51703/51422/64087/132/5631/6296/55312/221823/5167/2180/9414/2584/5164/51166/5562/6095/1806/38/79646/5151/2203/8460/2027/2618/8459/2639/1723/351/53354/55526/10165/84649/5471/32/1807/5224/80347/9611/5465/570/3479/22978/53632/6799/229/5236/10891/203/10157/3939/5198/7415/10965/51085/3158/4833/55022/5027/5313/54995/5208/54988/84693/6817/3101/123876/107/445329/55753/9567/8034/6774/51727/…
BP	GO:0002699	positive regulation of immune effector process	223	-0.366363	-1.85421	1.02791e-06	4.15032e-05	3.08039e-05	5718	tags=43%, list=23%, signal=33%	7784/91543/3123/11331/9655/640/7409/7040/5788/23529/2624/59067/2219/55198/3135/7474/5724/7292/2241/23586/3596/911/3125/2208/975/4292/8767/2048/6688/567/55601/7158/10666/3592/729230/114548/942/910/3594/6504/3684/958/6810/5914/54106/3140/909/2821/3133/6812/7186/4067/695/11314/3916/8764/10125/7805/3689/8140/913/6813/26191/7305/117854/6850/54440/4049/8673/3136/114836/54209/7293/3105/3098/940/6223/532…
CC	GO:0030684	preribosome	57	0.542234	2.27918	1.0747e-06	4.317e-05	3.20409e-05	5963	tags=56%, list=24%, signal=43%	55272/54663/8780/10885/10199/90441/23246/65083/23076/56342/57050/153443/79954/705/134430/55781/23212/92856/10607/5591/25983/11103/55813/84946/9790/51096/55759/23195/83732/51388/9724/51018
BP	GO:0009259	ribonucleotide metabolic process	325	0.317699	1.75078	1.09487e-06	4.37558e-05	3.24757e-05	5185	tags=36%, list=21%, signal=29%	6999/3295/2819/51703/51422/64087/132/6296/55312/5167/2180/9414/2584/5164/51166/5562/6095/1806/38/79646/5151/2203/8460/2027/2618/8459/2639/1723/351/53354/55526/10165/84649/5471/32/1807/5224/80347/9611/5465/570/3479/22978/53632/6799/229/5236/10891/203/10157/3939/5198/7415/10965/51085/3158/4833/55022/5027/5313/54995/5208/54988/84693/6817/3101/123876/107/445329/55753/9567/8034/6774/51727/11163/8803/1…
BP	GO:0072678	T cell migration	61	-0.544274	-2.23723	1.30579e-06	5.19199e-05	3.85352e-05	3205	tags=44%, list=13%, signal=39%	3676/3683/4478/729230/6373/6347/387/4267/8764/29108/3695/5293/347/9466/1235/64005/6387/199/6558/3627/10344/6352/11035/5294/7535/27347/6366
BP	GO:0033627	cell adhesion mediated by integrin	80	-0.489291	-2.1444	1.31865e-06	5.21666e-05	3.87182e-05	5048	tags=52%, list=20%, signal=42%	10519/3976/3687/1545/3674/8516/5747/3693/3678/3676/3683/3071/3680/255743/100/3684/3655/8515/3685/4067/83706/9404/3675/5328/3689/3695/9270/916/6850/55612/7042/1307/3673/6352/23075/5420/83700/3691/54997/5294/5777/6366
BP	GO:0006882	cellular zinc ion homeostasis	37	0.614129	2.35502	1.36774e-06	5.38369e-05	3.9958e-05	2570	tags=51%, list=10%, signal=46%	7779/4489/6505/23516/4499/4501/4493/4495/4496/4494/540/7781/64924/55630/4490/221074/7782/4502/55532
BP	GO:0006766	vitamin metabolic process	100	0.448344	2.09747	1.38396e-06	5.39333e-05	4.00295e-05	5626	tags=46%, list=22%, signal=36%	2729/57834/8876/441024/55312/1592/4051/4552/2638/80704/6573/10588/55163/6470/113235/1381/54659/1719/29968/7124/1543/57026/4837/154807/1576/9963/9962/29914/6472/166785/171425/1591/4036/54657/79001/3141/60496/157506/340665/5826/66002/6591/25974/686/11330/54905
BP	GO:0060562	epithelial tube morphogenesis	309	-0.330384	-1.72787	1.37749e-06	5.39333e-05	4.00295e-05	4850	tags=32%, list=19%, signal=26%	3687/5754/388585/7474/55036/25902/51548/2697/7075/8820/6789/9723/57057/7484/5314/25/859/81792/55212/23129/5499/2737/6201/64321/55081/1512/26249/4524/7976/388389/4776/653/1460/3611/115908/255743/387/4435/9620/7798/5914/2263/5058/1906/1436/8321/7289/79600/3202/5613/9355/284217/1856/5216/25865/8463/6714/5293/652/26160/650/780/2022/1282/7042/596/2736/2535/10252/79977/6659/4070/3627/54345/8543/2348/54…
BP	GO:0042100	B cell proliferation	94	-0.464417	-2.07542	1.4355e-06	5.56646e-05	4.13145e-05	4485	tags=49%, list=18%, signal=40%	640/115352/5788/23529/59067/51293/25/931/3596/4064/975/970/3446/2048/952/3071/683/100/958/54106/4067/959/695/3445/11314/10125/930/84433/7305/5585/581/5580/54440/596/57181/7293/1493/23228/4208/3635/973/27242/972/3575/10673/51176
BP	GO:0120031	plasma membrane bounded cell projection assembly	400	-0.31701	-1.71117	1.51767e-06	5.85612e-05	4.34643e-05	6663	tags=40%, list=26%, signal=30%	84260/2302/23322/57096/4218/26499/1785/2017/84100/161514/4651/23500/54443/154865/285331/51225/55742/10435/23386/3688/7414/25876/84314/10464/26005/10451/79734/1769/7419/22919/56171/1639/115704/2012/5991/1464/585/1012/197335/54828/79867/5898/353116/1952/5365/51715/84062/79902/55036/85478/55835/5314/25/2241/10602/387707/51382/55212/5911/2596/79738/10097/583/136332/55920/55081/23059/3265/10309/2048/5…
BP	GO:0009636	response to toxic substance	209	0.352596	1.85388	1.53455e-06	5.89222e-05	4.37323e-05	3156	tags=30%, list=13%, signal=26%	7779/196/4489/10587/2643/5888/4499/4501/4493/9131/4495/6348/23428/94241/4496/25841/948/6647/5446/5444/2745/2936/2954/4494/847/540/6532/83990/9588/6198/2176/4255/55244/9429/4257/1373/7001/1644/1719/1066/7124/6335/1543/6529/4490/383/4357/7782/5179/9376/128/5292/4502/55532/9963/25824/6715/1572/468/29914/10935/6571
CC	GO:0005844	polysome	60	-0.541155	-2.22019	1.56018e-06	5.93521e-05	4.40514e-05	3627	tags=47%, list=14%, signal=40%	6135/6231/6173/55323/6130/6160/6171/6235/6142/6141/25873/8667/6191/10445/4628/6143/6170/6132/6152/689/6156/6227/6194/6188/4736/6169/51389/7431
BP	GO:0002697	regulation of immune effector process	321	-0.330793	-1.74333	1.5609e-06	5.93521e-05	4.40514e-05	5718	tags=40%, list=23%, signal=31%	7784/91543/3123/11331/9655/79004/640/966/10875/7409/115352/7040/5788/23529/2624/59067/2219/55198/11005/3135/7474/5724/7292/2241/1524/23586/3596/3821/911/84695/3662/3125/2208/975/4292/684/7098/653361/8767/100507436/2048/6688/567/55601/7158/10666/3071/1178/3592/729230/114548/942/910/3594/6504/3684/958/6810/5914/54106/3140/909/2821/3133/6812/7186/4067/959/695/11314/3958/3916/8764/9437/10125/7805/368…
MF	GO:0005518	collagen binding	62	-0.528105	-2.18516	1.58147e-06	5.98134e-05	4.43937e-05	2691	tags=39%, list=11%, signal=35%	5154/8515/147372/5058/3675/1690/780/1291/7450/10491/8404/114897/3673/4060/7373/84168/5155/871/1634/127435/165/1292/6678/1513
BP	GO:0042102	positive regulation of T cell proliferation	98	-0.460306	-2.07855	1.5883e-06	5.98134e-05	4.43937e-05	3000	tags=34%, list=12%, signal=30%	3071/729230/942/3594/6504/3133/959/29108/26191/84433/916/79679/6850/9466/54440/3600/199/3105/6352/940/3113/6188/3109/923/11151/3115/301/3965/7535/100133941/6363/8440/10673
BP	GO:0046634	regulation of alpha-beta T cell activation	97	-0.458963	-2.0726	1.64483e-06	6.1352e-05	4.55357e-05	4458	tags=40%, list=18%, signal=33%	7292/384/84695/3662/3125/975/2737/8767/8546/3071/3592/729230/114548/942/3594/100/387/5914/3133/11314/3707/8764/57045/639/864/26191/916/6850/54440/257101/3105/940/3122/135/301/3965/4602/7535/6363
CC	GO:0015934	large ribosomal subunit	106	-0.445907	-2.04695	1.63763e-06	6.1352e-05	4.55357e-05	3627	tags=34%, list=14%, signal=29%	6135/6137/122704/6138/6173/6168/219927/11224/6133/6130/6160/6146/6171/6124/6142/6141/25873/6143/6170/6181/6132/6152/6175/124995/6136/6144/6156/116832/6154/4736/6169/6139/6157/51538/23521/6165
BP	GO:0002688	regulation of leukocyte chemotaxis	109	-0.446816	-2.05562	1.66944e-06	6.19749e-05	4.5998e-05	3595	tags=39%, list=14%, signal=33%	79148/7423/6688/1907/3071/3592/729230/6504/2621/683/6347/57402/2841/51157/5228/4067/1906/1436/79890/5764/56833/5879/1235/6387/199/3627/6352/23075/4681/83700/63940/5595/3965/7424/9353/27347/5880/972/6363/1236/4192/6366
BP	GO:0009083	branched-chain amino acid catabolic process	21	0.724189	2.40178	1.79574e-06	6.63492e-05	4.92447e-05	1816	tags=62%, list=7%, signal=57%	36/64087/594/38/11112/1892/4329/9673/27034/3155/593/26275/3028
BP	GO:0090132	epithelium migration	277	-0.344249	-1.77527	1.88648e-06	6.93748e-05	5.14902e-05	4662	tags=33%, list=19%, signal=27%	7474/23598/5728/10016/1545/9037/25/57381/9839/3640/4318/29941/23129/5025/5747/3315/1512/5646/161742/55466/6286/1839/3728/91862/6672/1907/10755/5797/22846/4627/1460/6776/958/387/51157/147372/3164/2821/8766/1906/27286/9404/7016/9647/5613/54453/3675/5216/2113/25865/9270/11156/6714/7114/5764/5293/652/5585/57175/51466/284/55612/5879/7042/7026/79977/4070/5168/64094/54345/306/3673/64218/5335/25959/4208/…
CC	GO:0098636	protein complex involved in cell adhesion	43	-0.598414	-2.29087	1.90507e-06	6.97308e-05	5.17545e-05	4391	tags=65%, list=17%, signal=54%	63923/3687/5354/3674/8516/3693/3678/58494/3676/3683/3680/3684/3655/8515/3685/4067/3675/5328/3689/3695/3957/1493/3673/940/11117/83700/3691/10077
BP	GO:0045619	regulation of lymphocyte differentiation	169	-0.3946	-1.92274	1.92953e-06	7.02979e-05	5.21754e-05	4458	tags=35%, list=18%, signal=29%	11005/3135/7292/25/57864/84695/3662/101/3559/2737/399/8767/8546/56339/3071/729230/114548/942/3594/2621/100/387/5914/54106/9760/695/3707/57178/10125/639/864/84433/56833/652/6850/54440/2736/3600/257101/6659/2177/2064/1493/940/939/3122/914/3635/301/3965/4602/7535/5777/972/6363/3111/3575/51176/4192
BP	GO:0051924	regulation of calcium ion transport	215	-0.36829	-1.85681	2.13091e-06	7.72752e-05	5.7354e-05	4425	tags=31%, list=18%, signal=26%	818/25/5354/859/387129/3596/5025/2859/117531/6622/5031/57620/2281/5999/274/6376/287/162514/6373/7466/6347/387/54106/808/126306/150/4067/6236/3958/3603/2669/28954/930/6548/1193/8614/3270/581/6717/3306/775/706/596/6387/2539/857/4283/3627/5335/6352/1535/5144/7070/51393/11151/135/2771/7852/5294/846/57165/5777/5155/5587/7220/5159/784
BP	GO:0050673	epithelial cell proliferation	364	-0.317724	-1.69712	2.15124e-06	7.7653e-05	5.76344e-05	4926	tags=31%, list=20%, signal=25%	5365/1749/8600/388585/7051/6331/3357/7128/858/7474/2810/5728/10016/51548/7075/9037/5314/8324/5654/54959/6369/1295/55081/3265/7423/90780/51146/567/91862/3676/7039/3592/3488/2254/5797/653/22846/6776/57599/8862/6347/113174/1601/657/3082/79400/51157/5228/3164/2263/2524/23213/3202/5613/26277/25865/864/9270/79805/79031/26051/1285/5764/5293/23385/652/26160/650/581/29128/252983/55612/3915/7042/6387/64919…
BP	GO:0006790	sulfur compound metabolic process	302	0.314883	1.71866	2.19456e-06	7.88532e-05	5.85251e-05	5199	tags=37%, list=21%, signal=30%	6999/494143/3295/51703/2729/55256/6505/6296/441024/5167/2180/9391/10402/6777/4522/51022/5164/2395/2690/51166/7358/4552/38/23563/6647/8460/2936/8459/2954/51218/22/4143/2639/80704/875/2940/80224/84649/32/2739/570/222537/1468/6799/1373/150274/391365/10157/26035/3373/26227/10965/4507/3158/54995/54988/4357/84693/3313/6817/26873/123876/445329/122961/7263/1036/2939/9348/6506/126792/8803/3029/10380/27247…
BP	GO:0034470	ncRNA processing	311	0.313613	1.72326	2.25671e-06	8.07159e-05	5.99076e-05	4858	tags=34%, list=19%, signal=28%	54517/25896/127253/55272/285605/55520/23405/64216/80324/1956/57418/8737/54663/25926/60528/23404/23160/8780/84128/26173/221078/54802/5073/10885/10199/10557/84267/339175/9611/54888/2926/2099/51202/10785/23246/9188/7124/65083/57647/150962/140432/23076/57505/3028/80746/56342/57050/55140/23369/55174/10269/153443/64172/79954/705/1654/10438/10775/134430/79039/10171/55781/60487/23212/23560/6774/84705/928…
BP	GO:0010959	regulation of metal ion transport	348	-0.323126	-1.71501	2.27232e-06	8.09048e-05	6.00479e-05	4563	tags=28%, list=18%, signal=24%	845/6833/818/25/5354/859/387129/3596/6536/6330/5025/2859/53826/117531/6622/4302/65268/5031/1804/57620/7533/3755/483/567/2281/5999/274/6376/287/162514/6373/7466/476/6347/387/134/54106/808/126306/3741/81831/150/4067/30820/6236/3958/3603/2669/28954/930/6548/1193/8614/3270/581/6717/389816/3306/775/706/3779/596/6387/2539/288/857/4283/23171/23479/3627/54209/5335/81/6352/1535/3792/5144/7070/51393/5270/1…
BP	GO:0006874	cellular calcium ion homeostasis	398	-0.305735	-1.65133	2.40764e-06	8.5335e-05	6.3336e-05	5348	tags=33%, list=21%, signal=27%	2280/805/624/146/9709/51024/5788/9187/2624/8811/2587/778/5028/3357/2828/858/781/7474/845/5314/6357/25/116/859/387129/1524/5737/931/5734/3596/10518/5025/2859/2905/6622/5031/54499/57620/4828/643/23241/94107/2359/22821/2281/5739/952/6376/1907/2846/3932/287/729230/162514/6373/5021/7466/23400/10800/958/6863/134/808/2841/8996/126306/3741/553/9900/3685/4067/1906/2769/10134/10312/121665/930/255231/5731/3…
BP	GO:0001819	positive regulation of cytokine production	430	-0.304459	-1.65168	2.47931e-06	8.74793e-05	6.49275e-05	2873	tags=32%, list=11%, signal=29%	4940/5788/3654/2207/59067/10538/2219/11334/5142/3357/3135/7474/5724/6833/1545/3428/7292/25/116/23586/51311/5734/3596/3662/101/975/7098/11119/3315/3265/8767/55655/2048/192683/567/10666/6376/22925/3592/729230/22954/4776/965/114548/942/3594/6504/958/657/5914/54106/3082/79400/51157/11118/283420/8877/147372/10394/3133/4063/150/7186/959/1436/23213/4939/64170/3603/8764/10125/6284/9636/7805/25865/255231/…
BP	GO:0050678	regulation of epithelial cell proliferation	307	-0.331224	-1.73639	2.50255e-06	8.79035e-05	6.52423e-05	5713	tags=36%, list=23%, signal=28%	7480/5727/5925/11331/2252/151306/1012/8854/1021/6899/7040/8573/2624/5365/1749/388585/7051/6331/3357/7128/858/7474/2810/5728/10016/51548/7075/9037/5314/8324/5654/54959/6369/55081/3265/7423/90780/51146/567/91862/3676/7039/3592/2254/5797/653/22846/6776/57599/8862/6347/113174/1601/657/51157/5228/3164/2263/2524/23213/3202/26277/25865/864/79805/79031/26051/1285/5764/5293/652/26160/650/581/29128/252983/…
MF	GO:0003995	acyl-CoA dehydrogenase activity	11	0.83091	2.23587	2.76117e-06	9.65546e-05	7.16632e-05	3602	tags=82%, list=14%, signal=70%	36/35/34/84129/27034/2639/33/80724/37
BP	GO:0014812	muscle cell migration	76	-0.495173	-2.14525	2.84471e-06	9.90338e-05	7.35033e-05	2788	tags=38%, list=11%, signal=34%	3488/2254/5154/387/657/9510/2768/5328/9270/3486/6714/7168/6282/57175/780/596/5361/199/3673/6352/4208/301/9353/51177/5155/5159/80310/4192/5327
BP	GO:2000508	regulation of dendritic cell chemotaxis	11	-0.837776	-2.18988	2.87714e-06	9.97195e-05	7.40122e-05	3357	tags=82%, list=13%, signal=71%	6688/3592/6504/2621/56833/1235/3965/1236/6366
BP	GO:0010810	regulation of cell-substrate adhesion	195	-0.367767	-1.82378	3.03131e-06	0.0001046	7.76347e-05	5880	tags=43%, list=23%, signal=33%	55966/94/6422/11170/4680/10551/1012/1021/10562/8573/54828/7248/91663/10519/285613/59339/5728/6789/9723/5314/8324/25/5747/4739/55920/2041/1295/3678/3728/1613/6376/10630/5786/57580/3611/683/255743/71/387/1601/7016/9647/54453/3675/5328/9270/2192/6548/151887/6714/347/916/780/1277/8751/55612/5879/596/402/6281/4070/182/2199/11078/1307/81/56477/2042/10109/1029/7070/11117/9806/2294/25890/54361/5155/30008…
BP	GO:0072676	lymphocyte migration	105	-0.442516	-2.02739	3.11667e-06	0.000107074	7.94708e-05	4662	tags=43%, list=19%, signal=35%	7474/6361/6357/81704/101/2629/6369/6367/6793/58494/3676/3683/6376/6362/4478/729230/6373/2621/6347/387/4267/2526/8764/29108/3695/5293/347/9466/1235/64005/6387/199/6558/3627/10344/6352/51192/11035/9023/5294/7535/27347/6363/1236/6366
BP	GO:0010273	detoxification of copper ion	13	0.799445	2.24781	3.17554e-06	0.00010778	7.99946e-05	2520	tags=69%, list=10%, signal=62%	4489/4499/4501/4493/4495/4496/4494/4490/4502
BP	GO:1990169	stress response to copper ion	13	0.799445	2.24781	3.17554e-06	0.00010778	7.99946e-05	2520	tags=69%, list=10%, signal=62%	4489/4499/4501/4493/4495/4496/4494/4490/4502
BP	GO:1902905	positive regulation of supramolecular fiber organization	158	-0.393563	-1.90487	3.17849e-06	0.00010778	7.99946e-05	4505	tags=37%, list=18%, signal=30%	10174/9037/25/85477/2241/859/10602/6369/2041/10411/80115/51199/274/28964/6376/3071/10300/387/9793/22899/10152/5058/2934/171024/1906/7016/9647/5216/29108/9270/389/403/7168/4131/51466/7454/89795/10163/4926/5879/961/402/6281/1902/10344/29109/10109/23075/9639/6188/148170/54361/23580/30008/11075/8440/1236/6366
BP	GO:0042559	pteridine-containing compound biosynthetic process	13	0.79732	2.24183	3.61104e-06	0.000121919	9.04889e-05	1984	tags=77%, list=8%, signal=71%	2643/4522/84105/5860/2618/10588/1719/5805/6697/5092
BP	GO:0055074	calcium ion homeostasis	410	-0.305669	-1.65615	3.62827e-06	0.000121975	9.05305e-05	5348	tags=34%, list=21%, signal=27%	2280/805/624/146/9709/51024/5788/9187/2624/8811/2587/778/5028/8600/3357/2828/858/781/7474/845/5314/6357/25/116/859/387129/1524/5737/931/5734/3596/10518/5025/2859/2905/6622/5031/54499/57620/4828/643/23241/94107/2359/22821/2281/5739/952/6376/1907/2846/3932/287/729230/162514/6373/5021/7466/23400/10800/958/6863/57402/134/808/2841/8996/126306/3741/553/9900/3685/4067/1906/2769/525/10134/10312/121665/93…
BP	GO:0048568	embryonic organ development	420	-0.301559	-1.63613	3.64509e-06	0.000122017	9.05616e-05	4914	tags=29%, list=20%, signal=23%	3976/257/1749/5754/7054/7474/474/55036/25902/7157/2697/2295/8820/6789/57057/7484/113026/56034/55212/5396/5915/3214/8516/121227/3638/2737/860/64321/55081/8320/4254/340784/2048/3213/55084/7976/1305/4237/388389/3199/2254/653/5154/22846/57599/115908/100/4435/2071/657/5914/23414/8563/2263/1906/10155/7289/3202/1856/525/3201/5090/639/25949/2296/8463/79805/3221/3880/3215/7942/347733/652/80714/26160/4920/…
CC	GO:0071556	integral component of lumenal side of endoplasmic reticulum membrane	28	-0.667537	-2.31499	3.70438e-06	0.000122161	9.06684e-05	4800	tags=64%, list=19%, signal=52%	3118/3135/3117/3125/3120/3119/3133/10134/121665/6892/3136/3105/3113/3122/3115/3106/3134/972
CC	GO:0098553	lumenal side of endoplasmic reticulum membrane	28	-0.667537	-2.31499	3.70438e-06	0.000122161	9.06684e-05	4800	tags=64%, list=19%, signal=52%	3118/3135/3117/3125/3120/3119/3133/10134/121665/6892/3136/3105/3113/3122/3115/3106/3134/972
BP	GO:0006094	gluconeogenesis	65	0.492002	2.13527	3.67338e-06	0.000122161	9.06684e-05	6424	tags=55%, list=26%, signal=41%	2819/23516/57486/34/5164/2875/2203/8864/2542/10165/84649/8789/5224/5465/1468/5236/10891/4837/5105/57818/1642/468/114899/2308/5091/2641/5771/5106/5903/84912/5950/3952/1407/5207/4485/27232
BP	GO:0071675	regulation of mononuclear cell migration	104	-0.448306	-2.05275	3.71177e-06	0.000122161	9.06684e-05	4312	tags=39%, list=17%, signal=33%	1524/81704/101/5747/6793/6688/58494/3676/4478/3592/729230/653/6504/2621/6347/387/57402/4067/1436/3958/8764/29108/56833/347/9466/961/1235/6387/199/3627/6352/11035/4681/5595/3965/9353/27347/80310/1236/4192/6366
BP	GO:0019221	cytokine-mediated signaling pathway	429	-0.299707	-1.62736	3.73996e-06	0.000122574	9.09746e-05	5358	tags=33%, list=21%, signal=26%	9447/146722/60401/84166/2322/9252/11024/4940/5788/23529/3654/10519/3563/2207/84817/55198/8600/7128/7474/7157/6361/6357/11140/2241/6374/1524/4599/103/970/3560/3559/583/8807/2859/7357/6369/90933/6367/3446/8767/3326/643/6688/56339/6672/6376/1907/353376/3460/5355/6586/6362/729230/22954/6373/1460/3594/3611/6776/2621/6347/6775/50615/149951/53832/8996/1438/3588/7188/8877/1511/867/10670/4352/7186/81030/1…
BP	GO:0031349	positive regulation of defense response	256	-0.340834	-1.74171	3.80998e-06	0.000124348	9.22916e-05	4825	tags=33%, list=19%, signal=27%	10318/8600/4889/2828/3135/7474/4818/3428/7292/51311/5734/101/975/6369/7098/90933/6622/8767/9782/6688/10666/6376/3592/729230/55450/54106/245928/3133/4067/5058/81030/4841/695/3916/64170/3603/10125/1075/55072/2113/29108/6714/1690/10133/7305/149628/10392/117854/6850/115362/961/4049/2167/3430/8673/3600/114836/54209/8717/3673/5603/6352/241/1535/81793/940/84034/6223/4208/5322/51284/51704/11117/834/63940…
CC	GO:0042788	polysomal ribosome	30	-0.648703	-2.27791	3.84279e-06	0.000124383	9.23172e-05	3627	tags=67%, list=14%, signal=57%	6135/6231/6173/6130/6160/6171/6235/6142/6141/25873/8667/6143/6170/6132/6152/689/6156/6227/4736/6169
BP	GO:0046632	alpha-beta T cell differentiation	104	-0.447875	-2.05077	3.82868e-06	0.000124383	9.23172e-05	5866	tags=48%, list=23%, signal=37%	51561/91543/159296/8943/3123/9655/59067/10538/7292/25/5734/84695/3662/5971/80758/2737/8320/8767/8546/26022/3071/114548/942/3594/944/100/387/6146/5914/2841/4063/9760/3707/639/864/6850/54440/596/64919/257101/114836/64218/3122/301/3702/3965/4602/7535/6363/51176
BP	GO:0055069	zinc ion homeostasis	38	0.598708	2.30778	3.91412e-06	0.000125653	9.32601e-05	2570	tags=50%, list=10%, signal=45%	7779/4489/6505/23516/4499/4501/4493/4495/4496/4494/540/7781/64924/55630/4490/221074/7782/4502/55532
BP	GO:0072330	monocarboxylic acid biosynthetic process	192	0.356079	1.85147	3.90327e-06	0.000125653	9.32601e-05	5052	tags=39%, list=20%, signal=31%	50640/51422/84696/6296/5007/8564/255189/5562/552/5825/64577/114880/1544/8864/3990/6770/9388/32/570/11160/10613/53632/551/51302/27349/116519/6342/80270/1066/84869/10998/1543/2628/1582/3028/51085/5313/54995/54988/33/6718/26063/123876/1576/4706/5629/1558/23600/114883/55825/50487/79071/11001/672/634/37/348158/197322/2695/130013/247/1581/11057/157506/335/11315/171586/10728/1571/1559/23417/5565/134429/…
BP	GO:0001776	leukocyte homeostasis	84	-0.469126	-2.06636	3.94937e-06	0.000126267	9.37159e-05	4853	tags=43%, list=19%, signal=35%	5142/7128/25/57864/3559/4254/55619/139818/3071/729230/9133/100/4352/4067/3707/27040/10312/5293/5532/608/5585/581/596/3957/1831/819/11035/4208/6372/6194/83700/11151/301/3965/972/10673
BP	GO:0031268	pseudopodium organization	13	-0.807436	-2.2402	3.99505e-06	0.000126693	9.40323e-05	291	tags=46%, list=1%, signal=46%	148170/3815/23580/57111/1236/6366
BP	GO:0001935	endothelial cell proliferation	135	-0.403611	-1.9231	3.98972e-06	0.000126693	9.40323e-05	2873	tags=30%, list=11%, signal=26%	3592/5797/22846/6776/8862/6347/79400/51157/5228/3164/2524/23213/5613/25865/9270/79805/79031/26051/1285/5293/652/650/6387/7026/857/51738/10344/5335/1535/4208/3148/6772/7424/5155/5587/2152/8742/947/4192/6678
BP	GO:0031123	RNA 3'-end processing	83	0.450809	2.04997	4.20537e-06	0.000132825	9.85835e-05	5396	tags=45%, list=21%, signal=35%	25896/55339/55520/79882/10914/22849/6832/170506/60528/23404/25888/351/87178/26173/5073/2926/3028/29894/53981/677/1479/54512/51010/57508/904/29101/118460/10898/81608/64852/51692/26512/55656/8189/134353/51574/54623
BP	GO:0060485	mesenchyme development	270	-0.337786	-1.73873	4.51569e-06	0.000142054	0.000105433	2473	tags=21%, list=10%, signal=20%	1601/657/3082/23414/8313/2263/59/1906/10155/3202/55273/140628/9965/2296/8463/80326/114990/147906/80709/652/650/2022/1277/8751/10505/7042/596/10252/4487/1910/182/25937/23187/64218/2348/2042/10507/4208/2487/26508/23275/5595/54796/6275/10439/2294/6662/6772/9464/1909/6909/54361/6943/5159/58495/51176/4192/7041
BP	GO:0002691	regulation of cellular extravasation	36	-0.622842	-2.26967	4.5884e-06	0.00014343	0.000106455	4567	tags=61%, list=18%, signal=50%	5724/5734/101/6484/3676/6403/729230/683/4267/2526/9466/961/6387/56477/11035/7070/83700/10164/80310/83483/4192/6366
CC	GO:0005775	vacuolar lumen	156	-0.388184	-1.87829	4.59607e-06	0.00014343	0.000106455	2961	tags=29%, list=12%, signal=26%	10493/1462/2171/2717/3339/23400/3423/5538/2760/6036/4758/81567/1511/175/8635/5549/1075/5036/29108/913/427/4069/3074/10487/1509/10577/302/5476/5580/58485/3425/4125/2719/4060/633/3614/2896/2239/2331/375790/5834/5159/972/1634/1513
MF	GO:0023026	MHC class II protein complex binding	26	-0.671634	-2.28261	4.67748e-06	0.000145392	0.00010791	4800	tags=69%, list=19%, signal=56%	3118/3117/931/3125/975/3120/3119/3326/567/311/3112/3113/3122/3109/3108/3115/972/3111
BP	GO:0007409	axonogenesis	408	-0.299463	-1.62291	4.99771e-06	0.000154122	0.00011439	5256	tags=31%, list=21%, signal=25%	63923/10211/9252/10494/57463/29882/84631/2290/85458/65078/5365/1749/26037/10371/4803/7474/4684/474/5728/9037/9723/885/25/7869/60/56920/2596/23129/2044/285220/343472/10500/2011/5747/2737/2041/399/2048/3326/91653/3800/5457/11344/3676/140578/7976/51199/1907/6586/4135/3199/1123/5797/4133/55201/1400/3996/28988/90249/55558/3909/6812/2263/3918/1627/5058/8766/1906/9201/26230/1436/23022/79600/214/9355/284…
BP	GO:1901361	organic cyclic compound catabolic process	423	0.282269	1.60312	4.98061e-06	0.000154122	0.00011439	6069	tags=36%, list=24%, signal=28%	6999/8942/5053/1763/23405/1776/79882/5167/8564/22849/6832/23034/9131/1432/23708/170506/64577/645/1806/38/5151/201626/3081/10924/60528/4329/5860/5446/23404/10605/1544/1244/2954/26135/10588/87178/23475/4913/5073/1807/3290/29974/54888/22978/2926/253943/200424/51302/30/125061/5169/6716/10840/8630/8148/7415/54915/1543/51071/27327/57026/10179/10492/23369/22868/3303/28234/6718/340719/677/1618/8570/1576/…
BP	GO:0010876	lipid localization	379	0.292353	1.64258	5.218e-06	0.000160285	0.000118964	3455	tags=27%, list=14%, signal=24%	1071/114885/10478/50640/9218/51703/10877/338/255738/10802/51099/5167/5007/2180/788/6777/58488/19/255189/118987/5781/4018/5562/5825/286410/319/948/114880/3931/1244/81537/440026/26279/51128/1814/3990/6770/23780/389610/1394/9388/84649/32/85320/2169/24/5465/6198/2806/1191/9429/116519/10351/1381/6342/718/23200/219931/1066/350/23460/7124/10998/1582/114571/4547/4833/10350/388323/6554/5027/1579/51761/118…
BP	GO:1902105	regulation of leukocyte differentiation	259	-0.341537	-1.75109	5.28198e-06	0.000161616	0.000119952	5870	tags=37%, list=23%, signal=28%	6422/51561/714/8943/5925/3123/9655/10875/115352/1021/7040/5788/2624/3976/4057/8600/11005/3135/7292/25/57864/56834/84695/3662/101/3559/2737/7098/399/4254/8767/8546/56339/5457/3071/729230/114548/942/3594/2621/9770/100/387/5914/54106/22985/4067/9760/695/3707/57178/10125/639/864/84433/56833/652/10766/7305/4920/6850/54440/4286/2736/10234/3600/257101/6659/2177/2064/2124/54209/1493/140685/940/939/3122/3…
BP	GO:0002253	activation of immune response	277	-0.336916	-1.73746	5.34143e-06	0.000162799	0.00012083	3875	tags=31%, list=15%, signal=27%	5747/974/11119/3265/8767/3119/9782/11120/2359/4277/952/10666/3071/3932/100/712/919/50852/11118/89857/55024/4067/79908/5058/81030/4841/695/11314/3958/9404/10616/7462/55072/23149/121665/7805/25865/930/29108/29085/26191/713/6714/84433/5293/7305/149628/79679/5583/581/2874/10657/6850/54900/5580/84174/79037/3543/961/596/64005/57181/54209/1493/3105/5335/940/5144/23228/4208/78989/7070/925/6188/4068/3635/…
BP	GO:0050866	negative regulation of cell activation	189	-0.368874	-1.82669	5.44619e-06	0.000165349	0.000122723	3553	tags=30%, list=14%, signal=26%	100507436/64092/6688/8654/6376/6441/3071/729230/942/5154/25807/1511/55024/4067/695/55824/11314/3958/7301/8764/57045/7805/864/26191/10457/652/7305/5585/79679/54900/5580/114897/2064/54209/1493/8530/11117/2615/23208/5270/2896/3635/135/301/3965/2294/5156/10077/5777/5155/27242/374403/3134/972/4192/114757
MF	GO:0050840	extracellular matrix binding	51	-0.542855	-2.15069	5.83066e-06	0.000176338	0.000130879	3287	tags=43%, list=13%, signal=38%	27076/2006/64129/3685/3958/3921/3675/169611/8404/25903/64094/2199/3673/6696/633/161198/9806/9353/375790/57124/1634/6678
BP	GO:1905114	cell surface receptor signaling pathway involved in cell-cell signaling	487	-0.292589	-1.6034	5.97811e-06	0.000180102	0.000133673	6188	tags=35%, list=25%, signal=27%	409/63977/2255/7482/25876/153090/85407/6259/57658/25928/6422/9968/6478/22930/4919/7480/8323/5026/25806/84866/7088/1951/5023/219771/57680/63923/7040/284654/2895/85458/6468/1952/283149/1749/5754/25805/7128/128272/8434/7474/10076/5728/8724/9037/8820/6789/7484/8324/25/9839/81029/869/387914/5025/57674/259266/2931/2905/2011/64359/5499/2737/9978/6622/64321/65268/57326/607/8325/90780/2870/3728/1613/5999/…
BP	GO:0097501	stress response to metal ion	17	0.757923	2.34895	6.03051e-06	0.000180985	0.000134328	4577	tags=76%, list=18%, signal=63%	7779/4489/4499/4501/4493/4495/4496/4494/4490/4502/55532/3309/11315
BP	GO:0044089	positive regulation of cellular component biogenesis	427	-0.297911	-1.61637	6.08038e-06	0.000181785	0.000134921	5254	tags=32%, list=21%, signal=26%	10211/7040/5341/54828/7248/57463/5898/2895/158038/1015/84631/3936/255967/9873/7157/55835/10174/25/2241/51100/859/10602/54674/4314/81857/11141/869/10097/92359/6369/2041/10411/6622/3265/143098/10273/81620/2048/29899/638/11344/139818/8115/5899/57633/80115/55062/51199/274/28964/6376/3071/4478/5021/23400/9696/9662/26052/21/387/261734/9793/22899/10152/5058/171024/10155/27286/54849/3958/7016/9647/23433/…
BP	GO:0009150	purine ribonucleotide metabolic process	308	0.308829	1.69062	6.11136e-06	0.000182016	0.000135093	5185	tags=36%, list=21%, signal=29%	6999/3295/2819/51703/51422/64087/132/6296/5167/2180/9414/2584/5164/51166/5562/6095/38/79646/5151/2203/8460/2027/2618/8459/2639/351/53354/55526/10165/84649/5471/32/5224/80347/9611/5465/570/3479/22978/53632/6799/229/5236/10891/203/10157/3939/5198/7415/10965/51085/3158/4833/55022/5027/5313/54995/5208/54988/84693/6817/3101/123876/107/445329/55753/9567/8034/6774/11163/8803/142/2773/55669/10380/54677/7…
BP	GO:0009060	aerobic respiration	131	0.399793	1.95235	6.20775e-06	0.000184187	0.000136704	5294	tags=37%, list=21%, signal=29%	664/23530/3416/2271/4718/2395/1327/4191/201626/4720/4719/27069/10105/55526/847/6390/7124/92259/7415/6391/51085/51103/9650/3418/7385/55753/4706/6392/8803/54205/374291/6472/4702/6389/4729/3419/4967/4731/7381/4609/4707/8801/11315/5162/1738/5161/79085/84275
MF	GO:0016614	oxidoreductase activity, acting on CH-OH group of donors	123	0.402814	1.95756	6.26355e-06	0.000185141	0.000137412	5153	tags=44%, list=20%, signal=35%	3295/2819/8513/4051/7358/11112/4191/6652/345275/126/54363/3290/622/51181/3030/317749/6716/80270/10901/3033/3939/84869/8630/6697/26227/3028/284541/7881/130/3418/6718/154807/128/51179/51171/3293/51170/125/8608/3419/79944/79001/147015/27294/127/5959/157506/9563/124/3032/197257/2730/10202/1962
BP	GO:0042430	indole-containing compound metabolic process	22	0.68778	2.29387	6.48382e-06	0.000190932	0.00014171	4402	tags=59%, list=17%, signal=49%	6999/8942/8564/2639/125061/1644/217/15/6715/23498/130013/2903/121278
BP	GO:0060070	canonical Wnt signaling pathway	270	-0.334818	-1.72345	6.54575e-06	0.000192033	0.000142528	6165	tags=40%, list=25%, signal=31%	63977/2255/7482/153090/85407/6259/25928/6422/9968/6478/7480/8323/7088/219771/57680/63923/7040/284654/85458/283149/1749/5754/25805/8434/7474/10076/5728/9037/8820/6789/7484/8324/9839/81029/259266/2931/5499/2737/9978/64321/65268/607/8325/90780/3728/1613/7976/26524/2010/152573/2254/3611/115908/261734/1601/22881/252839/55737/51339/8313/2263/1906/8321/1856/1454/8796/59352/130574/3065/80326/6714/1455/14…
BP	GO:0048762	mesenchymal cell differentiation	220	-0.352418	-1.77974	6.69835e-06	0.000195777	0.000145306	2473	tags=31%, list=10%, signal=29%	10371/3357/25805/7474/5728/10016/2295/9037/9723/57057/84695/7869/56920/10500/8320/4254/161742/10630/653/1601/657/3082/8313/2263/1906/10155/55273/140628/9965/2296/80326/114990/147906/80709/652/650/2022/1277/8751/10505/7042/596/10252/4487/1910/182/25937/23187/64218/2348/2042/10507/4208/2487/26508/23275/5595/6275/10439/6662/6772/9464/1909/54361/6943/58495/51176/4192/7041
BP	GO:0014910	regulation of smooth muscle cell migration	57	-0.53249	-2.16601	6.90713e-06	0.000201128	0.000149278	2788	tags=42%, list=11%, signal=38%	3488/2254/5154/387/657/9510/2768/5328/3486/6714/7168/6282/57175/596/5361/199/3673/6352/4208/9353/5155/5159/80310/4192
CC	GO:0042101	T cell receptor complex	13	-0.796355	-2.20946	7.11565e-06	0.000206433	0.000153215	2421	tags=69%, list=10%, signal=63%	919/50852/916/6850/925/915/7535/5777/917
BP	GO:0042178	xenobiotic catabolic process	24	0.666519	2.29223	7.4669e-06	0.000215824	0.000160185	4825	tags=58%, list=19%, signal=47%	2180/5446/1544/1557/30/8856/1543/1576/1558/55270/1555/2329/1577/1559
CC	GO:0005604	basement membrane	88	-0.459339	-2.0384	7.6411e-06	0.000220047	0.00016332	2765	tags=36%, list=11%, signal=32%	3339/255743/3909/3918/9510/1299/284217/1286/3898/2192/151887/1285/302/7058/7076/977/1282/3915/1289/64094/1284/3912/1296/3691/80144/375790/30008/4016/1306/10319/3908/6678
BP	GO:0045058	T cell selection	46	-0.562617	-2.19024	7.86339e-06	0.000225619	0.000167455	2655	tags=43%, list=11%, signal=39%	3594/387/4063/9760/1794/3707/84433/916/6850/596/3714/64919/3600/114836/940/915/7535/972/917/1236
BP	GO:0050907	detection of chemical stimulus involved in sensory perception	409	0.285898	1.61589	7.97143e-06	0.000227191	0.000168622	8274	tags=41%, list=33%, signal=28%	144125/563/391194/81285/150681/219958/219983/123041/390067/344892/346517/401992/81469/119687/138883/50840/403282/26683/132112/219957/219431/219493/79501/56656/403257/347169/26529/440153/390075/390321/392309/283160/283092/138803/7442/8989/390037/8392/391112/81697/26219/442186/341416/441933/390077/119682/138882/138802/441911/259289/390883/126541/119679/26648/282763/390199/119774/83756/8390/401993/3…
BP	GO:0001501	skeletal system development	484	-0.288078	-1.57767	7.97621e-06	0.000227191	0.000168622	4916	tags=27%, list=20%, signal=23%	51715/257/1749/4057/8600/388585/7474/25902/7157/51222/2697/7484/3238/85477/56034/81029/5734/81792/389058/4318/2121/5396/2778/5915/22856/3214/54360/3638/2737/860/80263/57326/64131/84159/6137/3213/392255/158326/55790/4921/1305/1462/124857/11173/1300/3199/2254/653/57599/9770/10006/387/4883/657/5914/85301/54808/8313/2263/1906/23213/7289/3202/5549/9061/3201/7298/864/2296/3074/4146/3221/6714/302/3215/1…
BP	GO:0042558	pteridine-containing compound metabolic process	33	0.617325	2.29063	8.18068e-06	0.000232171	0.000172318	1984	tags=58%, list=8%, signal=53%	2346/2643/441024/4522/8836/84105/4552/5860/2618/6573/10588/10841/6470/113235/1719/10840/5805/6697/5092
CC	GO:0042613	MHC class II protein complex	17	-0.7496	-2.24	8.40538e-06	0.000237687	0.000176412	4800	tags=88%, list=19%, signal=71%	3123/3118/3117/3125/3120/3119/567/3112/3113/3122/3109/3108/3115/972/3111
BP	GO:0034341	response to interferon-gamma	134	-0.398051	-1.89066	8.90493e-06	0.000250908	0.000186225	4662	tags=41%, list=19%, signal=34%	7474/51667/7157/6361/6357/11140/7791/10097/6814/684/6369/7098/6622/6367/3326/1613/6672/6376/6362/965/115361/3594/6347/71/958/4435/6810/6812/2934/1906/7376/4641/8519/7454/252983/115362/961/2634/199/6737/10344/6352/3113/834/7431/338382/3965/6772/23580/10537/972/6363/9341/23521/6366
BP	GO:0048659	smooth muscle cell proliferation	129	-0.400649	-1.8937	9.08711e-06	0.000255123	0.000189353	5373	tags=40%, list=21%, signal=32%	1012/93649/7040/3654/1264/388585/4889/7128/5728/5724/2697/3596/4318/5031/10203/1839/5739/6376/2006/3592/3488/2254/8862/387/4883/657/2263/9510/1906/2768/3065/3486/7168/347/652/650/59272/4854/3600/199/55810/3673/6352/1535/4208/4209/2771/6772/5155/30008/5159/80310
BP	GO:0048660	regulation of smooth muscle cell proliferation	128	-0.407616	-1.92867	9.60452e-06	0.000268686	0.00019942	5373	tags=41%, list=21%, signal=32%	1012/93649/7040/3654/1264/388585/4889/7128/5728/5724/2697/3596/4318/5031/10203/1839/5739/6376/2006/3592/3488/2254/8862/387/4883/657/2263/9510/1906/2768/3065/3486/7168/347/652/650/59272/4854/3600/199/55810/3673/6352/1535/4208/4209/2771/6772/5155/30008/5159/80310
MF	GO:0003823	antigen binding	57	-0.527683	-2.14646	9.69526e-06	0.00027026	0.000200588	5949	tags=63%, list=24%, signal=48%	3822/140885/7106/3123/7040/11024/2219/3135/3117/911/3125/6891/3119/3676/910/6504/958/909/3133/8140/913/6892/3543/6890/3136/3105/3113/10417/3122/5518/3115/3106/4239/962/3134/3575
BP	GO:0015849	organic acid transport	297	0.301517	1.64038	9.95315e-06	0.000276465	0.000205193	5206	tags=34%, list=21%, signal=28%	10478/50640/51703/117247/94081/55089/6505/18/54407/2180/788/8564/255189/5562/552/23204/120103/5825/23428/948/375611/284111/9673/1244/79751/26279/8864/1814/6573/10165/85320/2169/5465/6198/113235/6582/2806/55244/1468/551/9429/1381/94097/7124/10998/2917/114571/256987/6567/159963/6529/6554/5027/11255/1579/28234/246213/6520/6542/8402/9963/7442/83733/153129/118980/6506/9962/81579/115111/54677/183/50487…
BP	GO:0030178	negative regulation of Wnt signaling pathway	148	-0.392418	-1.88925	1.04862e-05	0.00029024	0.000215418	3998	tags=31%, list=16%, signal=26%	387914/57674/2931/64359/2737/9978/64321/26524/2010/3090/152573/4776/2254/115908/4435/261734/1601/22881/51339/8313/8321/3065/147906/650/4920/55612/80114/85409/9686/27303/30851/857/25776/92162/25937/2719/84445/2487/147495/27122/6662/5204/4192/3489/6425/144165
BP	GO:0050911	detection of chemical stimulus involved in sensory perception of smell	369	0.291519	1.63487	1.06385e-05	0.00029342	0.000217777	8916	tags=45%, list=35%, signal=29%	144125/391194/81285/150681/219958/219983/123041/390067/346517/401992/81469/119687/138883/403282/26683/219957/219431/219493/79501/56656/403257/347169/26529/440153/390075/390321/392309/283160/283092/138803/390037/8392/391112/81697/26219/442186/341416/441933/390077/119682/138882/138802/441911/390883/126541/119679/26648/282763/390199/119774/8390/401993/343406/127385/219870/219954/338675/219487/79345/…
CC	GO:0030686	90S preribosome	21	0.696215	2.309	1.08027e-05	0.000295199	0.000219098	4658	tags=62%, list=19%, signal=50%	55272/10885/10199/23246/65083/153443/134430/92856/10607/55813/9790/51096/55759
CC	GO:0008305	integrin complex	31	-0.628573	-2.21168	1.08161e-05	0.000295199	0.000219098	4850	tags=68%, list=19%, signal=55%	3687/5354/3674/8516/3693/3678/3676/3683/3680/3684/3655/8515/3685/4067/3675/3689/3695/3673/11117/3691/10077
BP	GO:0001936	regulation of endothelial cell proliferation	120	-0.409828	-1.90797	1.07939e-05	0.000295199	0.000219098	5373	tags=42%, list=21%, signal=33%	1012/8854/2624/5365/3357/858/7474/10016/51548/7075/9037/6369/7423/3676/3592/5797/22846/6776/8862/6347/51157/5228/3164/2524/23213/25865/79805/79031/26051/1285/5293/652/650/6387/7026/857/51738/10344/5335/1535/4208/3148/6772/7424/5155/5587/2152/8742/4192/6678
BP	GO:0031272	regulation of pseudopodium assembly	11	-0.815426	-2.13146	1.1085e-05	0.000298382	0.00022146	291	tags=45%, list=1%, signal=45%	148170/3815/23580/1236/6366
BP	GO:0031274	positive regulation of pseudopodium assembly	11	-0.815426	-2.13146	1.1085e-05	0.000298382	0.00022146	291	tags=45%, list=1%, signal=45%	148170/3815/23580/1236/6366
BP	GO:0001841	neural tube formation	98	-0.436291	-1.97011	1.09732e-05	0.000298382	0.00022146	5948	tags=47%, list=24%, signal=36%	10959/6422/9968/23654/8323/5727/585/7040/7248/5898/5754/7474/25902/6789/25/6201/55081/4524/7976/653/115908/9620/7798/5914/8321/7289/79600/9355/1856/5216/8463/652/26160/7042/2535/79977/6659/8543/2348/6692/6768/51098/57216/10653/58495/144165
BP	GO:0046916	cellular transition metal ion homeostasis	105	0.411587	1.9284	1.10279e-05	0.000298382	0.00022146	3448	tags=34%, list=14%, signal=30%	7779/80762/4489/6505/23516/4499/23545/7036/4501/4493/2395/4495/4496/6647/22/351/4494/540/113235/4891/286133/7781/64924/55630/57817/4490/1317/221074/3263/7782/4502/55532/57217/391059/523/7018
BP	GO:0002690	positive regulation of leukocyte chemotaxis	86	-0.44803	-1.98346	1.12717e-05	0.000302367	0.000224418	3543	tags=37%, list=14%, signal=32%	7423/6688/1907/3071/3592/729230/6504/2621/57402/51157/5228/1906/1436/5764/5879/1235/6387/199/3627/6352/23075/63940/5595/3965/7424/27347/5880/972/6363/1236/4192/6366
BP	GO:0009070	serine family amino acid biosynthetic process	17	0.749688	2.32343	1.15329e-05	0.000308319	0.000228835	3498	tags=71%, list=14%, signal=61%	4522/64902/22928/875/6470/1719/29968/26227/256987/6472/22929/189
BP	GO:0006869	lipid transport	336	0.298361	1.653	1.17844e-05	0.000313969	0.000233029	3891	tags=29%, list=15%, signal=25%	1071/114885/10478/50640/9218/51703/10877/338/255738/10802/5007/2180/788/58488/19/255189/118987/5781/4018/5562/5825/286410/319/948/114880/3931/1244/81537/440026/26279/51128/1814/3990/6770/23780/389610/1394/9388/85320/2169/24/5465/6198/2806/1191/9429/116519/10351/1381/6342/23200/219931/1066/350/23460/10998/1582/114571/4547/4833/10350/388323/6554/5027/1579/51761/118471/10809/28234/4824/80830/3949/50…
MF	GO:0005506	iron ion binding	131	0.391822	1.91342	1.22998e-05	0.000326592	0.000242398	5052	tags=40%, list=20%, signal=32%	1595/316/55256/5053/57834/1592/2395/4051/6059/5264/1544/1573/57404/2230/55217/64816/1557/51302/1562/1589/1543/1582/121642/284541/1579/26234/1576/8424/122961/1558/1036/1572/5352/27247/23498/7018/1591/1555/1585/1586/247/23474/1577/1581/121278/83475/2235/340665/1571/1559/66002/10858
BP	GO:0045061	thymic T cell selection	22	-0.686829	-2.25294	1.24378e-05	0.000329141	0.00024429	2106	tags=55%, list=8%, signal=50%	9760/1794/3707/84433/916/3714/940/915/7535/972/917/1236
CC	GO:0098644	complex of collagen trimers	21	-0.708522	-2.27453	1.29109e-05	0.000340509	0.000252727	4036	tags=71%, list=16%, signal=60%	1287/1295/1300/85301/1286/1285/1290/1277/1282/1289/1307/1281/1284/4060/1278
BP	GO:0045123	cellular extravasation	69	-0.489369	-2.08476	1.37103e-05	0.000360379	0.000267475	4567	tags=48%, list=18%, signal=39%	5724/2241/1524/5734/101/58494/6484/3676/3683/6376/6403/729230/683/6347/4267/2526/3695/5293/9466/961/6387/50512/56477/11035/5175/7070/83700/5294/10164/80310/83483/4192/6366
CC	GO:0072562	blood microparticle	105	0.408196	1.91251	1.389e-05	0.000363881	0.000270074	4460	tags=44%, list=18%, signal=36%	731/2220/735/1370/2243/1/3697/8547/325/721/5444/3075/2638/2266/720/3078/629/7448/1191/722/718/715/590/3303/2335/3263/3827/716/5627/51279/5005/2244/462/5340/183/7018/6521/8542/5345/1356/3273/259/10878/51129/335/922
BP	GO:0019319	hexose biosynthetic process	67	0.479021	2.1009	1.42239e-05	0.000371386	0.000275644	6424	tags=55%, list=26%, signal=41%	2819/23516/57486/34/5164/2875/2203/6652/8864/2542/10165/84649/8789/5224/5465/1468/5236/10891/4837/5105/57818/1642/468/114899/2308/5091/2641/5771/5106/5903/84912/5950/3952/1407/5207/4485/27232
MF	GO:0023023	MHC protein complex binding	34	-0.613407	-2.20537	1.47547e-05	0.000383966	0.000284981	4800	tags=59%, list=19%, signal=48%	3118/3117/931/3821/3125/975/3120/3119/3326/567/311/3112/3113/925/3122/3109/3108/3115/972/3111
MF	GO:0003779	actin binding	402	-0.299014	-1.61545	1.50615e-05	0.000390652	0.000289943	5023	tags=32%, list=20%, signal=26%	85458/7134/81930/92241/1264/3936/9124/4606/23307/57471/10092/2318/114793/10552/25/85477/2241/4629/6645/822/4650/10093/60312/2314/10097/4046/5747/7739/54434/6622/64098/26249/7533/11344/27295/80206/130271/274/2010/55607/4478/8826/10755/23345/6709/116154/26064/1265/9260/22846/91010/4627/9696/51474/55201/1266/28988/50853/221692/4644/3927/1627/2934/171024/91977/23022/79585/1495/226/120/9051/5216/10095…
BP	GO:0009074	aromatic amino acid family catabolic process	14	0.771776	2.23046	1.53075e-05	0.00039526	0.000293364	4050	tags=79%, list=16%, signal=66%	6999/8942/5053/8564/3081/5860/2954/125061/2184/23498/130013
MF	GO:0004497	monooxygenase activity	95	0.428389	1.97912	1.54225e-05	0.00039526	0.000293364	6576	tags=52%, list=26%, signal=38%	1595/5053/57834/8564/1592/4051/84105/1544/1573/57404/64816/1557/51302/1562/1589/1543/1582/5092/284541/1579/6718/1576/1558/1572/51004/1591/1555/1585/1586/2330/2329/1577/1581/121278/83475/340665/1571/1559/66002/10858/54905/80020/4846/199974/1109/1593/1553/3162/4842
BP	GO:0051928	positive regulation of calcium ion transport	108	-0.425382	-1.95188	1.53606e-05	0.00039526	0.000293364	6553	tags=46%, list=26%, signal=34%	2916/57158/6262/409/2149/6769/9002/5026/6781/5023/805/8573/781/25/5354/387129/3596/5025/6622/5031/57620/6376/287/162514/6373/7466/6347/808/3958/930/6548/581/6717/3306/706/6387/2539/857/4283/3627/5335/6352/7070/51393/846/57165/5155/7220/5159/784
BP	GO:0030111	regulation of Wnt signaling pathway	285	-0.323071	-1.67661	1.5441e-05	0.00039526	0.000293364	4721	tags=32%, list=19%, signal=26%	25805/7128/8434/7474/10076/8724/9037/6789/8324/25/9839/81029/387914/57674/259266/2931/64359/5499/2737/9978/64321/65268/57326/3728/1613/26524/6597/2010/3090/152573/4776/2254/3611/115908/10927/4435/261734/1601/22881/252839/55737/51339/8313/2263/23213/8321/3675/1454/8796/59352/130574/3065/6714/1455/147906/5300/650/4920/1277/55612/80114/85409/9686/27303/30851/857/25776/6659/92162/55789/25937/6206/150…
MF	GO:0052689	carboxylic ester hydrolase activity	122	0.392636	1.90684	1.55155e-05	0.000395872	0.000293818	3894	tags=32%, list=15%, signal=27%	57406/50640/8513/84696/51099/255189/57176/5446/5444/3931/26279/79575/3990/9388/9588/570/217/1066/10965/57505/5407/55699/590/375775/13/8228/23491/51365/760/9348/150379/81579/10434/2166/55347/50487/344752/80222/283748
BP	GO:0043068	positive regulation of programmed cell death	462	-0.287612	-1.57449	1.57707e-05	0.000401078	0.000297682	4706	tags=29%, list=19%, signal=24%	9262/3135/7474/27063/5728/7157/1545/6789/25/85477/5654/6196/101/4318/2208/5913/5915/27429/80758/5499/7098/10181/6201/6622/1917/1512/11200/8767/7078/10628/5457/1613/23787/3676/842/5551/5133/274/9833/26524/23429/22925/3932/3592/5134/580/4776/10553/9770/65264/6347/3684/958/387/2071/3655/53832/1728/5740/3164/7153/7186/4067/2934/81030/959/1495/694/10616/3202/8439/824/5883/1075/10134/8682/7805/8678/291…
MF	GO:0042608	T cell receptor binding	10	-0.836026	-2.12643	1.65763e-05	0.000420201	0.000311875	2972	tags=90%, list=12%, signal=79%	3932/3140/3133/1794/916/54869/3105/3122/917
BP	GO:0032609	interferon-gamma production	107	-0.417228	-1.91837	1.69406e-05	0.000426674	0.000316679	5033	tags=38%, list=20%, signal=31%	59067/5142/7474/7292/25/51311/7098/11119/3265/8767/10666/3592/729230/3594/6504/2621/5914/54106/11118/10125/9636/7805/29108/8140/26191/916/9466/54440/961/4049/114836/3105/11035/5144/3113/51284/10225/914/3115/3965/1236
BP	GO:0032649	regulation of interferon-gamma production	107	-0.417228	-1.91837	1.69406e-05	0.000426674	0.000316679	5033	tags=38%, list=20%, signal=31%	59067/5142/7474/7292/25/51311/7098/11119/3265/8767/10666/3592/729230/3594/6504/2621/5914/54106/11118/10125/9636/7805/29108/8140/26191/916/9466/54440/961/4049/114836/3105/11035/5144/3113/51284/10225/914/3115/3965/1236
BP	GO:2000510	positive regulation of dendritic cell chemotaxis	10	-0.834397	-2.12228	1.76544e-05	0.000443227	0.000328965	3357	tags=80%, list=13%, signal=69%	6688/3592/6504/2621/1235/3965/1236/6366
BP	GO:0043542	endothelial cell migration	200	-0.353525	-1.75869	1.78623e-05	0.000447013	0.000331775	4662	tags=34%, list=19%, signal=28%	7474/23598/5728/10016/1545/9037/25/57381/23129/5025/5747/3315/5646/161742/55466/6286/3728/6672/1907/10755/5797/22846/4627/1460/6776/958/387/51157/147372/3164/2821/1906/27286/9404/5613/54453/2113/25865/9270/11156/7114/5764/5293/652/57175/284/5879/7026/64094/54345/306/64218/5335/4208/2191/161198/2896/301/5294/7424/9353/5155/5587/1634/8742/6237/6678
BP	GO:0050856	regulation of T cell receptor signaling pathway	40	-0.56601	-2.12494	1.7958e-05	0.000447977	0.00033249	3129	tags=45%, list=12%, signal=39%	10666/3932/100/50852/11314/3958/7805/25865/29085/26191/84433/84174/79037/7070/6188/4068/5777/1236
BP	GO:0002260	lymphocyte homeostasis	62	-0.493641	-2.04256	1.86879e-05	0.000463975	0.000344364	4719	tags=44%, list=19%, signal=35%	7128/25/57864/3559/55619/139818/3071/9133/100/4067/27040/10312/5532/608/5585/581/596/3957/1831/819/11035/4208/6194/11151/3965/972/10673
CC	GO:0098802	plasma membrane signaling receptor complex	172	-0.365552	-1.78445	1.87177e-05	0.000463975	0.000344364	4391	tags=31%, list=17%, signal=26%	5354/3674/3560/3559/8807/8516/1741/27429/2905/974/3693/10203/3678/567/3676/3683/3680/126129/3594/9568/3684/958/3655/657/919/1438/50852/8515/3588/7188/3685/7186/4067/3675/26090/55072/3689/3695/650/916/6850/9466/2064/3673/925/11117/3691/915/973/7535/10077/5777/917
BP	GO:0001909	leukocyte mediated cytotoxicity	117	-0.407659	-1.89074	1.89439e-05	0.000466626	0.000346332	5949	tags=48%, list=24%, signal=37%	3822/51561/566/3123/7409/6338/5788/59067/3004/11334/3135/4818/1524/3821/911/3811/2209/1512/100507436/6688/567/5551/10666/3071/3592/910/3594/3684/3140/909/1511/3133/127544/3916/9437/10125/1075/913/6813/5532/7305/23207/3136/114836/3105/3002/11035/6372/3122/4068/11151/3106/3965/5777/3134/3575
BP	GO:0044262	cellular carbohydrate metabolic process	248	0.319339	1.71948	1.89332e-05	0.000466626	0.000346332	5526	tags=36%, list=22%, signal=28%	51422/3170/3572/673/178/57486/5167/2584/34/2683/5164/6095/2585/2875/2998/2203/2646/6652/3612/5502/8864/3795/10020/84649/8789/32/10499/9611/5465/3479/5255/55556/53632/378884/9653/51805/10891/64080/2822/4837/10269/5581/5208/79660/3418/3101/5105/10580/7360/6774/1642/9348/6526/114899/5256/10380/55347/116255/2308/3628/27329/6521/2710/2632/3099/4952/374907/3038/3481/2642/8867/208/2641/5836/10728/5771/8…
BP	GO:0010634	positive regulation of epithelial cell migration	136	-0.394736	-1.88239	1.91403e-05	0.000469987	0.000348826	5225	tags=38%, list=21%, signal=30%	7040/54828/2624/10519/7474/10016/9037/25/57381/3640/4318/5025/3315/1512/1839/6776/958/51157/147372/2821/8766/1906/27286/9647/54453/3675/5216/2113/25865/9270/6714/7114/5293/652/284/5879/7042/5168/64094/306/3673/5335/2896/301/5294/6662/7424/5155/5587/57111/6237/6678
MF	GO:0004984	olfactory receptor activity	367	0.287977	1.61163	1.92641e-05	0.000471549	0.000349985	8916	tags=44%, list=35%, signal=29%	144125/391194/81285/150681/219958/219983/390067/346517/401992/81469/119687/138883/403282/26683/219957/219431/219493/79501/56656/403257/347169/26529/440153/390075/390321/392309/283160/283092/138803/390037/8392/391112/81697/26219/442186/341416/441933/390077/119682/138882/138802/441911/390883/126541/119679/26648/282763/390199/119774/8390/401993/343406/127385/219870/219954/338675/219487/79345/284532/…
BP	GO:0042476	odontogenesis	123	-0.406624	-1.89883	2.02576e-05	0.000494323	0.000366888	2521	tags=26%, list=10%, signal=24%	387/657/8313/2263/1906/1495/10312/2296/3065/9622/80326/6714/652/650/581/1277/7042/2736/3714/64919/4487/3399/3912/1278/147495/682/5156/9464/358/1080/947/51176
BP	GO:0031579	membrane raft organization	22	-0.678279	-2.2249	2.04303e-05	0.00049699	0.000368868	5254	tags=64%, list=21%, signal=50%	10211/5788/91663/858/859/5538/10347/2934/1794/302/857/4118/6281/914
BP	GO:0048872	homeostasis of number of cells	251	-0.333104	-1.69904	2.05836e-05	0.000497627	0.000369341	3357	tags=30%, list=13%, signal=27%	25/57864/1524/103/2629/3559/9898/3276/4254/8546/6688/567/55619/139818/3071/729230/9133/57599/9770/100/7564/22985/51621/2821/4352/4067/51705/212/3707/3202/64170/6208/27040/10312/2113/9636/60682/6218/84433/5293/5532/7067/608/23385/652/5585/10365/581/51309/54440/10320/596/2539/6659/3957/1831/819/11035/6223/4208/6372/6194/83700/3059/3635/11151/301/3148/3965/6662/6772/3815/972/3575/10673/1236
BP	GO:0032535	regulation of cellular component size	308	-0.318635	-1.66932	2.05432e-05	0.000497627	0.000369341	5206	tags=35%, list=21%, signal=28%	54437/585/7409/9856/5341/4703/7248/29882/91663/65078/56262/6559/10371/9873/4803/56996/7474/10092/5728/9037/9723/10552/25/85477/2241/859/5865/10602/7869/822/10093/56920/2314/343472/10500/5499/6369/54434/79822/3326/11344/80206/130271/80115/274/2006/3071/4478/6709/23400/4133/51474/387/28988/51334/50853/1173/55558/1627/2934/8766/1906/120/79890/5216/10095/8799/29108/7114/90952/4131/51466/393/7454/5580…
BP	GO:0002399	MHC class II protein complex assembly	16	-0.744281	-2.17051	2.0821e-05	0.000500278	0.000371308	5623	tags=88%, list=22%, signal=68%	3123/3118/3117/3125/3120/3119/567/3112/3113/3122/3109/3108/3115/3111
BP	GO:0002503	peptide antigen assembly with MHC class II protein complex	16	-0.744281	-2.17051	2.0821e-05	0.000500278	0.000371308	5623	tags=88%, list=22%, signal=68%	3123/3118/3117/3125/3120/3119/567/3112/3113/3122/3109/3108/3115/3111
BP	GO:0003007	heart morphogenesis	233	-0.334813	-1.70018	2.15926e-05	0.000516257	0.000383168	6349	tags=38%, list=25%, signal=29%	79933/22943/55742/6262/57493/4091/26005/10959/94/6261/23462/5727/28514/585/8854/2280/6899/7040/7134/4889/7054/3357/7474/27063/55036/7157/2697/57057/859/55212/23129/2931/5747/64321/55081/10637/5457/2006/6586/388389/653/3611/657/23414/8313/2263/9510/1906/8321/55273/57178/1856/140628/4634/2296/8463/7168/2274/652/26160/650/2022/8751/23768/7042/10848/1289/2535/10252/79977/4487/6659/182/54345/2348/4208…
BP	GO:0007264	small GTPase mediated signal transduction	447	-0.287061	-1.565	2.16178e-05	0.000516257	0.000383168	4410	tags=30%, list=18%, signal=25%	25/5912/57381/8412/10602/54509/396/2305/81704/4650/5911/56882/2859/116442/22800/79822/10411/29127/399/4254/3265/80230/2048/29899/9363/23682/890/84033/22821/84986/55619/139818/5899/283455/9649/22898/51735/56990/64121/2846/10630/266747/392/11188/11186/1123/57580/6016/8625/57636/387/9620/57572/28988/2841/867/3685/22899/2782/150/10152/1794/10155/26230/6236/3707/23433/2768/253980/54453/27040/3675/1012…
BP	GO:1990868	response to chemokine	86	-0.440453	-1.94991	2.19278e-05	0.000520487	0.000386308	4497	tags=43%, list=18%, signal=35%	6361/6357/6374/1524/81704/2859/6369/6367/643/6376/6586/6362/729230/6373/6347/387/4352/1906/2919/2296/1235/6387/4283/6558/3627/54209/10663/10344/6352/6372/7852/9353/27347/6363/1236/2833/6366
BP	GO:1990869	cellular response to chemokine	86	-0.440453	-1.94991	2.19278e-05	0.000520487	0.000386308	4497	tags=43%, list=18%, signal=35%	6361/6357/6374/1524/81704/2859/6369/6367/643/6376/6586/6362/729230/6373/6347/387/4352/1906/2919/2296/1235/6387/4283/6558/3627/54209/10663/10344/6352/6372/7852/9353/27347/6363/1236/2833/6366
BP	GO:1903169	regulation of calcium ion transmembrane transport	130	-0.399663	-1.88808	2.20378e-05	0.000521518	0.000387073	6622	tags=47%, list=26%, signal=35%	59285/84502/57158/5621/6262/10681/2149/6769/2534/9002/5023/2280/805/5142/781/845/25/5354/859/387129/3596/2859/117531/6622/5031/57620/2281/274/6376/287/6373/54106/808/126306/150/4067/6236/2669/28954/930/6548/1193/3270/581/6717/3306/775/2539/4283/3627/5335/1535/5144/7070/11151/5294/57165/5777/5587/7220/784
BP	GO:0071622	regulation of granulocyte chemotaxis	44	-0.546946	-2.11317	2.22576e-05	0.000521986	0.00038742	3000	tags=39%, list=12%, signal=34%	3071/6504/683/57402/1906/1436/5879/6352/83700/5595/9353/5880/972/6363/1236/4192/6366
BP	GO:0006721	terpenoid metabolic process	92	0.433329	1.99027	2.22072e-05	0.000521986	0.00038742	5806	tags=49%, list=23%, signal=38%	1592/64577/1544/83875/126/84649/24/1557/1562/317749/1381/54659/10901/1543/3158/130/8228/128/1576/1558/6715/55825/5919/125/8608/4047/222236/4036/147015/127/5959/1577/54577/4035/157506/7276/54884/124/340665/1571/1559/8694/216/54905/5950
MF	GO:0022804	active transmembrane transporter activity	366	0.282624	1.58246	2.21525e-05	0.000521986	0.00038742	5211	tags=32%, list=21%, signal=26%	10060/117247/55089/6505/23516/79572/54407/19/4718/389015/57130/120103/5825/10246/1327/23428/4720/4719/375611/284111/6581/1244/487/22/79751/2542/490/6573/28231/540/6532/123041/85320/24/113235/6582/23169/55244/1468/9429/10351/57468/4891/291/23460/9153/114571/6580/10350/114134/6567/159963/28968/6529/6554/344905/3954/133482/28234/9376/246213/10864/6520/8402/84561/9963/8034/488/23315/83733/368/6506/65…
BP	GO:0006720	isoprenoid metabolic process	110	0.409038	1.93359	2.2503e-05	0.000526168	0.000390524	6185	tags=47%, list=25%, signal=36%	1592/64577/5264/1544/83875/126/84649/24/1557/1562/317749/1381/54659/10901/1543/3158/3422/130/8228/128/1576/1558/6715/55825/5919/125/8608/4047/57107/222236/4036/147015/23590/127/5959/1577/54577/4035/157506/7276/54884/124/340665/1571/1559/8694/216/3156/54905/5950/79644/1109
BP	GO:0061309	cardiac neural crest cell development involved in outflow tract morphogenesis	12	-0.810317	-2.17796	2.26438e-05	0.000527883	0.000391797	2041	tags=50%, list=8%, signal=46%	1906/652/182/2348/9464/1909
BP	GO:0032729	positive regulation of interferon-gamma production	74	-0.473082	-2.03337	2.28879e-05	0.00053199	0.000394845	5033	tags=46%, list=20%, signal=37%	59067/5142/7474/7292/25/51311/7098/11119/3265/8767/10666/3592/729230/3594/6504/54106/11118/10125/9636/29108/8140/26191/916/9466/54440/4049/114836/3105/5144/3113/51284/914/3115/3965
BP	GO:0008360	regulation of cell shape	131	-0.401066	-1.89684	2.31038e-05	0.000535421	0.000397391	4926	tags=42%, list=20%, signal=34%	5365/5028/57471/25805/114793/9723/6357/57381/10602/54509/56882/23129/2011/5747/6369/399/1613/56990/10630/55023/4478/91010/4627/6347/387/55558/1436/226/23433/2768/3689/389/3074/7168/1690/4628/54751/23370/2245/5879/5361/1902/30011/64218/55843/10507/11151/301/148170/3815/89846/23580/51177/5880/391
BP	GO:0072175	epithelial tube formation	129	-0.391046	-1.84831	2.34844e-05	0.000542636	0.000402746	6167	tags=43%, list=25%, signal=33%	317/2255/10959/6422/9968/23654/8323/5727/585/7040/7248/5898/5754/388585/7474/25902/8820/6789/7484/25/6201/55081/4524/7976/653/115908/9620/7798/5914/2263/8321/7289/79600/9355/1856/5216/8463/5293/652/26160/7042/2535/79977/6659/8543/2348/5420/6692/6768/51098/57216/6662/54361/10653/58495/144165
BP	GO:0010595	positive regulation of endothelial cell migration	96	-0.425672	-1.92205	2.40574e-05	0.00055424	0.000411359	5225	tags=40%, list=21%, signal=31%	7040/54828/2624/10519/7474/10016/9037/25/57381/5025/3315/6776/958/51157/147372/2821/1906/27286/54453/2113/25865/9270/7114/5293/652/284/5879/64094/306/5335/2896/301/5294/7424/5155/5587/6237/6678
BP	GO:0051145	smooth muscle cell differentiation	54	-0.513721	-2.05317	2.43706e-05	0.000559809	0.000415492	2796	tags=31%, list=11%, signal=28%	4776/2254/255743/6443/2263/652/2022/1910/4208/2294/6662/3815/1909/6909/54361/5155/30008
BP	GO:0034765	regulation of ion transmembrane transport	413	-0.292466	-1.58441	2.44483e-05	0.000559951	0.000415598	4567	tags=28%, list=18%, signal=23%	5724/845/6833/170850/25/5354/859/387129/93107/3596/5243/55799/6536/6330/4318/60598/2859/53826/117531/6622/65268/3764/5031/1804/57620/2048/8911/23416/3762/7533/3755/483/2281/5999/89822/274/6376/3460/3751/6332/287/729230/6373/6347/5997/3769/54106/808/126306/823/81831/150/4067/30820/1906/84329/6236/2669/10312/28954/930/6548/1193/10550/7114/3270/59272/581/56660/6717/389816/3306/775/53405/3779/3790/25…
BP	GO:0001818	negative regulation of cytokine production	238	-0.332655	-1.69638	2.45865e-05	0.000561474	0.000416729	5654	tags=34%, list=22%, signal=26%	9683/3123/9655/28514/55353/79004/9252/7040/5966/4940/5788/11334/55198/4057/7128/7292/384/1524/51311/5734/3596/2629/5971/684/2048/3326/5552/28964/6376/6441/3071/3592/114548/6504/2621/5914/54106/3082/2841/245928/55024/50856/695/307/57045/7805/29108/26191/7114/347/10457/199713/5443/7305/10365/284/89795/706/9466/5879/7042/51738/54209/28951/6992/2615/8815/23208/10225/3635/301/3965/5777/27242/3134/1001…
BP	GO:0006637	acyl-CoA metabolic process	81	0.442636	2.00003	2.5214e-05	0.000572074	0.000424596	5122	tags=43%, list=20%, signal=35%	6999/3295/51703/6296/2180/5164/51166/38/2639/84649/32/570/10157/10965/3158/54995/54988/84693/123876/8803/79071/10249/23305/4967/348158/197322/51268/8801/5162/134526/8050/23181/23417/1738/5161
BP	GO:0035383	thioester metabolic process	81	0.442636	2.00003	2.5214e-05	0.000572074	0.000424596	5122	tags=43%, list=20%, signal=35%	6999/3295/51703/6296/2180/5164/51166/38/2639/84649/32/570/10157/10965/3158/54995/54988/84693/123876/8803/79071/10249/23305/4967/348158/197322/51268/8801/5162/134526/8050/23181/23417/1738/5161
BP	GO:0006909	phagocytosis	220	-0.340891	-1.72153	2.52697e-05	0.000572074	0.000424596	5056	tags=39%, list=20%, signal=31%	2624/2207/2219/23396/90342/11334/55198/63916/8724/25/9777/4689/56882/3560/55423/2209/5747/399/51454/5031/81035/122618/3683/56990/4688/353376/6441/3071/22841/729230/375033/1265/4627/6504/2621/6347/3684/134/5914/22918/11031/10347/8877/3685/4067/5058/2934/1794/3561/4486/11314/311/7301/8678/3689/29108/6714/7305/6850/5580/3543/5879/961/9938/64005/3600/199/54209/306/3673/1535/5175/5322/10417/78989/2320…
BP	GO:0045621	positive regulation of lymphocyte differentiation	101	-0.4269	-1.93842	2.61451e-05	0.000590186	0.000438039	4209	tags=52%, list=17%, signal=44%	11006/259307/3458/2547/7048/2625/10385/572/22890/51561/8943/3123/9655/5788/3135/7292/101/3559/2737/399/8767/8546/3071/114548/942/3594/2621/100/387/5914/9760/695/3707/57178/10125/864/6850/54440/2736/3600/6659/939/3122/3635/301/3965/4602/7535/972/6363/3575/51176/4192
BP	GO:0060021	roof of mouth development	85	-0.451019	-1.98684	2.6283e-05	0.000591593	0.000439083	4903	tags=38%, list=19%, signal=30%	1749/7474/2295/7484/84695/55212/5396/3638/2737/84159/90780/2048/124857/657/8321/2049/26160/7042/3714/2535/9242/4487/2615/10541/54796/80144/5156/9464/6909/27152/6943/51176
MF	GO:0015291	secondary active transmembrane transporter activity	223	0.324545	1.71047	2.82966e-05	0.000633277	0.000470021	3882	tags=30%, list=15%, signal=25%	117247/55089/6505/23516/54407/389015/120103/10246/23428/375611/284111/79751/2542/6573/28231/6532/123041/113235/23169/55244/1468/57468/4891/291/9153/114571/6580/114134/6567/159963/28968/6529/6554/3954/133482/28234/9376/246213/10864/6520/8402/84561/9963/8034/23315/83733/6506/6575/9962/113655/6526/6570/6574/51151/6571/9197/115111/6521/6543/5172/1497/6579/6527/57282/10599/387700
BP	GO:0022604	regulation of cell morphogenesis	272	-0.318882	-1.64429	2.82647e-05	0.000633277	0.000470021	5130	tags=35%, list=20%, signal=28%	29882/91663/10519/283149/5365/5028/57471/25805/3706/7474/114793/9204/9723/6357/25/57381/10602/54509/11141/56882/10097/57699/23129/2011/5747/4739/151835/55920/6369/399/2048/1613/56990/10630/55023/4478/57580/91010/4627/3611/6347/387/1601/28988/4352/55558/1627/1436/226/7016/23433/2768/1856/3689/9270/389/3074/2192/126374/6714/7168/1690/4628/54751/57175/7694/23370/2245/5879/5361/6281/4070/5168/1902/10…
BP	GO:1990266	neutrophil migration	116	-0.413366	-1.91561	2.84708e-05	0.000635362	0.000471568	3097	tags=40%, list=12%, signal=35%	6361/6357/6374/101/6369/399/6367/6376/1907/3071/6362/3680/6373/57580/683/6347/4267/2526/1906/3958/2919/3689/255231/56833/5293/6850/5879/7042/4283/3627/10344/6352/51192/5175/6372/83700/5294/682/9353/5880/972/6363/1236/4192/391/6366
BP	GO:0006006	glucose metabolic process	173	0.344818	1.7667	2.86444e-05	0.000637419	0.000473095	5944	tags=42%, list=24%, signal=32%	2819/4041/3170/23516/57486/5167/34/5164/1432/5562/6095/2875/2203/2646/6652/8864/2542/3795/10165/84649/8789/32/5224/10499/5465/3479/1468/51181/5236/10891/7124/2822/4837/10269/5208/79660/3101/5105/10580/57818/1642/468/114899/5290/2308/5091/4886/3099/55276/26330/4609/3481/2642/9563/208/2641/5162/5771/1374/23417/6097/5106/5161/5509/7021/5903/84912/5211/115209/5950/3952/3784
BP	GO:0071621	granulocyte chemotaxis	114	-0.411303	-1.89568	2.88104e-05	0.000639296	0.000474488	3097	tags=43%, list=12%, signal=38%	4354/6278/2207/23396/5142/6361/6357/6374/5747/6369/6367/6376/1907/3071/6362/3680/6373/57580/6504/683/6347/57402/1906/1436/3958/2919/3689/5293/6850/5879/7042/4283/3627/10344/6352/51192/6372/83700/5595/301/5294/682/9353/5880/972/6363/1236/4192/6366
BP	GO:0022900	electron transport chain	133	0.376537	1.84348	2.89298e-05	0.000640132	0.000475109	4141	tags=33%, list=16%, signal=28%	2819/29958/51022/4718/2110/1327/4720/5860/4719/2936/1544/27069/79751/10165/2230/6390/10891/8659/217/8630/26227/6391/51103/314/128/2109/4706/83733/6715/6392/54205/374291/4702/5447/23498/8608/6389/4729/2731/1528/4129/2108/4731/7381
BP	GO:0016101	diterpenoid metabolic process	82	0.428016	1.93253	2.90152e-05	0.000640214	0.000475169	5806	tags=49%, list=23%, signal=38%	1592/64577/1544/83875/126/84649/24/1562/317749/1381/54659/10901/1543/130/8228/128/1576/1558/6715/55825/5919/125/8608/222236/4036/147015/127/5959/1577/54577/4035/157506/7276/54884/124/340665/8694/216/54905/5950
BP	GO:0006641	triglyceride metabolic process	86	0.423843	1.92793	2.94079e-05	0.000647057	0.000480248	3528	tags=34%, list=14%, signal=29%	1071/8513/338/9663/255738/51099/2180/6400/5781/6653/3990/9388/847/84649/116519/1373/718/350/10998/2822/4547/13/8228/5105/3949/150379/23175/116255/2710
BP	GO:0046034	ATP metabolic process	205	0.337866	1.77285	3.00079e-05	0.000658408	0.000488673	4577	tags=33%, list=18%, signal=27%	2819/51422/5167/2584/4718/2395/5562/1327/201626/4720/2203/4719/2027/27069/10105/351/55526/10165/10845/5224/9611/5465/3479/53632/229/5236/10891/203/65220/5169/3939/7124/7415/6391/51085/51103/55022/5027/5313/5208/3303/4625/3101/7385/55753/4706/6774/6392/142/54205/374291/6472/4702/523/6521/6389/4729/3099/4967/1497/4731/7381/26330/4609/4707/4621/11315
BP	GO:0009081	branched-chain amino acid metabolic process	25	0.642868	2.23514	3.0489e-05	0.000667097	0.000495122	1816	tags=52%, list=7%, signal=48%	36/64087/594/38/11112/1892/4329/9673/27034/3155/593/26275/3028
BP	GO:0002275	myeloid cell activation involved in immune response	89	-0.441163	-1.96417	3.23284e-05	0.00070376	0.000522334	2865	tags=51%, list=11%, signal=45%	5729/640/6338/2624/2207/90342/5724/2241/1524/3596/6814/6688/729230/6504/3684/6810/867/6812/4067/1794/695/11314/27040/10125/6284/7462/3689/29108/6813/5293/7305/6850/3430/8673/5730/54209/306/2896/5294/3965/2294/3815/5777/5880/6844
BP	GO:0010811	positive regulation of cell-substrate adhesion	115	-0.411383	-1.90154	3.23444e-05	0.00070376	0.000522334	5650	tags=43%, list=22%, signal=34%	4680/10551/1012/1021/10562/7248/91663/10519/285613/59339/6789/25/4739/2041/1295/3678/3728/6376/57580/3611/255743/1601/7016/9647/54453/3675/9270/151887/916/55612/5879/402/6281/2199/11078/1307/56477/10109/7070/11117/9806/2294/25890/54361/5155/30008/6237/1236/4192/6366
BP	GO:0001771	immunological synapse formation	14	-0.765243	-2.16458	3.27452e-05	0.000710045	0.000526998	4241	tags=79%, list=17%, signal=65%	81704/975/5551/4478/1794/3958/923/6363/8440/1236/6366
CC	GO:0043202	lysosomal lumen	89	-0.441003	-1.96346	3.28145e-05	0.000710045	0.000526998	6529	tags=52%, list=26%, signal=38%	2817/2720/10855/6448/8029/23646/5641/2992/4958/2581/2799/1464/1200/54749/3073/2629/4126/1462/2717/3339/23400/3423/5538/2760/4758/81567/8635/5549/913/427/3074/1509/10577/5476/3425/4125/2719/4060/633/2239/2331/375790/5159/972/1634/1513
BP	GO:0051279	regulation of release of sequestered calcium ion into cytosol	68	-0.478489	-2.02437	3.33731e-05	0.000720142	0.000534493	4563	tags=43%, list=18%, signal=35%	845/25/387129/3596/6622/5031/2281/6376/287/6373/808/126306/4067/930/1193/3270/581/6717/775/4283/3627/5335/1535/5144/7070/11151/5777/5587/7220
BP	GO:0035567	non-canonical Wnt signaling pathway	71	-0.468887	-2.0068	3.4071e-05	0.000731442	0.000542879	6457	tags=58%, list=26%, signal=43%	23500/166336/22943/25876/85407/6259/6422/9968/4919/8323/1951/1952/5754/128272/7474/7484/8324/25/81029/57674/8325/7976/115908/387/1601/9620/22881/51339/8321/1856/1454/4920/5879/2535/2719/2487/57216/2239/54361/6425/144165
BP	GO:0016331	morphogenesis of embryonic epithelium	139	-0.379185	-1.81633	3.40835e-05	0.000731442	0.000542879	6167	tags=44%, list=25%, signal=33%	317/2255/7482/5100/10959/6422/9968/23654/8323/5727/585/8854/220/7040/7248/5898/5754/388585/7474/25902/6789/7484/25/6201/55081/4524/7976/653/115908/9620/7798/5914/2263/23213/8321/7289/79600/9355/1856/5216/8463/652/26160/7042/3714/2535/79977/6659/8543/2348/6692/6768/51098/57216/6662/7424/54361/10653/58495/7041/144165
BP	GO:0072006	nephron development	141	-0.380632	-1.82229	3.42517e-05	0.000731604	0.000542999	2641	tags=27%, list=10%, signal=24%	3611/255743/4435/59/23213/3675/1286/2296/1285/652/650/284/4854/596/4358/51196/1910/4070/182/25937/5420/2719/84445/5175/4208/26508/6662/5156/6772/1909/54361/5155/6943/5159/100133941/80310/947/8842
BP	GO:0072001	renal system development	293	-0.315353	-1.6437	3.42779e-05	0.000731604	0.000542999	4811	tags=31%, list=19%, signal=25%	84062/5754/388585/2828/79902/7474/3070/7484/5314/384/55746/4318/23129/5915/8516/2737/64321/1512/3764/84159/26249/90780/392255/842/9784/8826/7466/79659/5154/3611/255743/387/4435/5914/2263/59/9510/23213/5613/3675/1286/639/2296/403/1285/652/650/581/5125/284/1282/4854/231/80114/7042/596/2736/4358/10252/168002/6659/51196/1910/4070/182/25937/5420/3399/2719/84445/5175/25959/4208/57216/26508/80144/1028/2…
BP	GO:0010522	regulation of calcium ion transport into cytosol	87	-0.446845	-1.97684	3.5191e-05	0.000747021	0.000554442	6523	tags=49%, list=26%, signal=37%	84502/57158/5621/6262/2149/2534/9002/5026/5023/2280/805/845/25/387129/3596/5025/6622/5031/2281/6376/287/6373/808/126306/4067/930/1193/3270/581/6717/775/596/857/4283/3627/5335/1535/5144/7070/11151/5777/5587/7220
BP	GO:0050727	regulation of inflammatory response	318	-0.31409	-1.65105	3.51048e-05	0.000747021	0.000554442	4825	tags=32%, list=19%, signal=26%	10318/405753/8600/89790/4889/2828/7128/7474/4818/7292/5734/4314/3596/81792/101/2629/4318/975/7791/3559/6369/7098/653361/6622/10203/28964/6376/55872/313/729230/114548/683/100/55450/134/54106/3082/25807/5740/8877/55737/245928/3133/4067/81030/695/3603/7301/26090/1075/2113/255877/29108/58189/9536/6714/747/7114/56833/80709/27293/59272/284207/2874/6850/5580/961/4049/2167/3430/8673/3600/51738/1910/2177/…
BP	GO:0001838	embryonic epithelial tube formation	117	-0.398844	-1.84986	3.57099e-05	0.000755989	0.000561098	5948	tags=43%, list=24%, signal=33%	10959/6422/9968/23654/8323/5727/585/7040/7248/5898/5754/388585/7474/25902/6789/7484/25/6201/55081/4524/7976/653/115908/9620/7798/5914/8321/7289/79600/9355/1856/5216/8463/652/26160/7042/2535/79977/6659/8543/2348/6692/6768/51098/57216/6662/54361/10653/58495/144165
BP	GO:0009593	detection of chemical stimulus	442	0.267379	1.52695	3.61524e-05	0.000763294	0.00056652	8916	tags=44%, list=35%, signal=29%	144125/3170/6857/721/563/391194/81285/150681/219958/219983/123041/390067/344892/346517/401992/81469/119687/138883/50840/403282/26683/132112/219957/219431/219493/79501/56656/403257/347169/26529/440153/390075/390321/392309/283160/283092/3929/138803/7442/8989/390037/8392/391112/81697/26219/442186/341416/441933/390077/119682/138882/138802/441911/259289/390883/126541/119679/26648/7099/282763/390199/11…
BP	GO:1904062	regulation of cation transmembrane transport	299	-0.315719	-1.64845	3.70489e-05	0.000780118	0.000579006	4563	tags=29%, list=18%, signal=24%	845/6833/25/5354/859/387129/3596/6536/6330/4318/2859/53826/117531/6622/65268/5031/1804/57620/2048/7533/3755/483/2281/5999/274/6376/3460/287/729230/6373/6347/5997/54106/808/126306/823/81831/150/4067/30820/1906/6236/2669/10312/28954/930/6548/1193/7114/3270/59272/581/6717/389816/3306/775/3779/2539/288/857/4283/23171/23479/3627/54209/5335/81/1535/3792/5144/4208/7070/11151/54997/5294/53827/57555/1909/…
MF	GO:0140101	catalytic activity, acting on a tRNA	84	0.436148	1.98143	3.72926e-05	0.000783144	0.000581253	5692	tags=44%, list=23%, signal=34%	51091/127253/285605/55520/80324/57176/124454/79731/55157/60528/221078/54802/10557/339175/54888/10785/150962/57505/80746/55699/10775/60487/55253/2193/283459/80222/4234/10056/51367/92935/81890/9836/80755/56931/10799/23395/79828
BP	GO:0060071	Wnt signaling pathway, planar cell polarity pathway	53	-0.506379	-2.02235	3.74918e-05	0.000785223	0.000582796	6444	tags=62%, list=26%, signal=46%	166336/22943/25876/85407/6259/6422/9968/4919/8323/1951/1952/5754/128272/7474/7484/8324/25/7976/115908/387/1601/9620/22881/51339/8321/1856/4920/5879/2535/2719/57216/2239/144165
BP	GO:0051791	medium-chain fatty acid metabolic process	15	0.736893	2.18856	3.81444e-05	0.00079676	0.000591359	4680	tags=67%, list=19%, signal=54%	84696/34/1066/284541/54995/1579/54677/1384/11057/171586
BP	GO:0048002	antigen processing and presentation of peptide antigen	57	-0.503848	-2.04951	3.9165e-05	0.000815903	0.000605567	5037	tags=54%, list=20%, signal=44%	2207/3118/3135/3117/3125/6891/3120/64167/3119/567/3140/50856/3133/29108/1509/23457/6892/6890/3136/54209/3105/3112/3113/3122/3109/3108/3115/3106/3134/972/3111
BP	GO:0043552	positive regulation of phosphatidylinositol 3-kinase activity	31	-0.605272	-2.1297	4.01154e-05	0.000832978	0.00061824	2901	tags=42%, list=12%, signal=37%	388121/4067/930/6714/5156/3815/5155/5587/5159/2261/6363/1236/6366
MF	GO:0050660	flavin adenine dinucleotide binding	76	0.454706	2.03658	4.05164e-05	0.000832978	0.00061824	5950	tags=50%, list=24%, signal=38%	36/316/10587/35/8564/34/84129/9131/2110/4552/1806/51706/51/2936/27034/58510/2639/33/80724/51004/5447/6389/8309/4128/37/10994/2330/4129/2329/2108/197257/1738/8540/25974/56931/7498/80020/4846
BP	GO:0010632	regulation of epithelial cell migration	212	-0.341176	-1.70837	4.03563e-05	0.000832978	0.00061824	4662	tags=32%, list=19%, signal=26%	7474/23598/5728/10016/9037/25/57381/3640/4318/5025/5747/3315/1512/161742/55466/1839/3728/91862/6672/5797/22846/1460/6776/958/387/51157/147372/2821/8766/1906/27286/9647/54453/3675/5216/2113/25865/9270/6714/7114/5764/5293/652/51466/284/5879/7042/7026/4070/5168/64094/306/3673/64218/5335/4208/2896/301/5294/6662/7424/9353/5155/5587/1634/57111/6237/6678
BP	GO:0002460	adaptive immune response based on somatic recombination of immune receptors built from immunoglobulin superfamily domains	276	-0.322934	-1.66567	4.0476e-05	0.000832978	0.00061824	5225	tags=39%, list=21%, signal=31%	7040/733/5788/23529/2207/10538/3004/3118/7128/10384/3135/3117/7292/51311/3821/911/84695/3662/3125/2208/975/970/5971/4292/3120/2209/1512/3265/8767/100507436/3119/2048/567/7158/5551/10666/26022/3071/1178/3592/729230/4791/114548/910/3594/6504/100/958/712/50615/3140/11118/909/89857/3133/4063/7186/959/695/64170/1075/10312/930/913/713/5532/5585/7454/5580/84174/9466/54440/3543/4049/1235/64005/3136/11483…
BP	GO:0043065	positive regulation of apoptotic process	451	-0.282162	-1.53913	4.04527e-05	0.000832978	0.00061824	4706	tags=29%, list=19%, signal=24%	9262/3135/7474/27063/5728/7157/1545/6789/25/85477/5654/6196/101/4318/5913/5915/27429/80758/5499/7098/10181/6201/6622/1917/1512/11200/8767/7078/10628/5457/1613/23787/3676/842/5133/274/9833/26524/23429/22925/3932/3592/5134/580/4776/9770/65264/6347/3684/958/387/2071/3655/53832/1728/5740/3164/7153/7186/4067/2934/81030/959/1495/694/10616/3202/8439/824/5883/1075/10134/8682/8678/29108/6548/3486/10550/67…
BP	GO:1905517	macrophage migration	49	-0.534857	-2.11022	4.07649e-05	0.000835893	0.000620403	4709	tags=49%, list=19%, signal=40%	79902/1524/975/5025/5747/79148/6376/1907/6441/729230/6504/6347/1436/3958/255231/56833/4920/1910/54209/6352/51192/11117/5595/4192
BP	GO:0006968	cellular defense response	52	-0.511288	-2.03945	4.18294e-05	0.000855481	0.000634942	6316	tags=54%, list=25%, signal=40%	728/3688/3822/3812/10219/51715/3135/1524/5408/4046/653361/7716/5551/4688/729230/50852/9437/10312/8678/7305/1235/4283/3959/23643/4068/135/3702/51473
CC	GO:0005583	fibrillar collagen trimer	12	-0.798143	-2.14524	4.28183e-05	0.000871157	0.000646576	2304	tags=67%, list=9%, signal=61%	85301/1290/1277/1289/1307/1281/4060/1278
CC	GO:0098643	banded collagen fibril	12	-0.798143	-2.14524	4.28183e-05	0.000871157	0.000646576	2304	tags=67%, list=9%, signal=61%	85301/1290/1277/1289/1307/1281/4060/1278
BP	GO:0002478	antigen processing and presentation of exogenous peptide antigen	34	-0.596085	-2.14309	4.30642e-05	0.00087389	0.000648605	5037	tags=62%, list=20%, signal=49%	2207/3118/3117/3125/3120/3119/567/50856/3133/1509/6890/3105/3112/3113/3122/3109/3108/3115/3134/972/3111
BP	GO:0003253	cardiac neural crest cell migration involved in outflow tract morphogenesis	10	-0.815249	-2.07358	4.36089e-05	0.000882658	0.000655112	2041	tags=50%, list=8%, signal=46%	1906/652/2348/9464/1909
BP	GO:0033539	fatty acid beta-oxidation using acyl-CoA dehydrogenase	10	0.813114	2.12104	4.40002e-05	0.000888282	0.000659287	4063	tags=90%, list=16%, signal=75%	35/34/84129/2110/2639/33/2109/37/2108
BP	GO:0090066	regulation of anatomical structure size	433	-0.282782	-1.53396	4.49986e-05	0.000903779	0.000670789	5480	tags=33%, list=22%, signal=26%	54437/5023/585/7409/9856/6916/624/146/5341/6338/4703/7248/29882/91663/65078/56262/5028/6559/112/10371/3357/9873/4803/56996/7474/10092/5728/9037/9723/10552/7484/25/85477/2241/859/5865/10602/7869/822/10093/56920/2314/343472/10500/5499/6369/153/54434/79822/3326/11344/554/952/1621/80206/130271/80115/274/1907/2006/3071/4478/6709/10911/5021/23400/10800/4133/51474/342527/387/4883/134/5997/28988/51334/50…
BP	GO:0009991	response to extracellular stimulus	432	0.267421	1.52339	4.48969e-05	0.000903779	0.000670789	5092	tags=30%, list=20%, signal=24%	8942/664/10634/2729/51422/255738/3170/1981/594/178/54407/2180/34/51022/5164/9131/1432/1592/2690/5562/552/154/38/2875/6647/2752/6652/5444/6581/432/80315/2626/6653/2153/1965/490/875/9388/847/96459/6532/83990/32/220441/5465/6198/2155/53632/4255/3358/10891/1373/81929/359/3171/6716/7124/30849/1543/1582/27327/3158/590/55630/57817/6554/5027/5313/2693/9681/383/90226/5179/5105/8648/3949/5292/58528/80010/5…
BP	GO:0008652	cellular amino acid biosynthetic process	69	0.469379	2.06117	4.55273e-05	0.000912059	0.000676934	6119	tags=57%, list=24%, signal=43%	55256/5053/441024/18/4522/84105/4552/1806/64902/2752/22928/875/2746/6470/2806/1373/1719/10157/29968/26227/4507/256987/5092/435/5352/6472/22929/189/10994/60496/11315/23743/51733/216/63826/10955/27165/445/493
CC	GO:0071005	U2-type precatalytic spliceosome	46	-0.533421	-2.07658	4.70119e-05	0.00092061	0.00068328	6655	tags=61%, list=26%, signal=45%	26121/6627/9129/84950/9128/84844/83443/24148/6637/10946/9343/51634/51691/6636/6628/8449/23450/57819/51690/27258/6629/84811/3550/10992/6633/153527/8175/10262
BP	GO:0043299	leukocyte degranulation	72	-0.464551	-1.99327	4.65054e-05	0.00092061	0.00068328	4589	tags=49%, list=18%, signal=40%	4818/5724/2241/3596/6814/6688/3071/729230/3684/6810/867/6812/4067/695/11314/3916/27040/10125/6284/7462/3689/6813/5293/6850/8673/5730/306/11151/5294/3965/2294/3815/5880/3134/6844
BP	GO:0032418	lysosome localization	71	-0.463325	-1.983	4.70028e-05	0.00092061	0.00068328	2881	tags=37%, list=11%, signal=33%	4135/2647/4627/867/6812/4067/695/54849/11314/27040/10125/6284/7462/6813/5293/7942/6850/8673/23207/5730/5294/3965/2294/3815/83871/5880
BP	GO:1990849	vacuolar localization	71	-0.463325	-1.983	4.70028e-05	0.00092061	0.00068328	2881	tags=37%, list=11%, signal=33%	4135/2647/4627/867/6812/4067/695/54849/11314/27040/10125/6284/7462/6813/5293/7942/6850/8673/23207/5730/5294/3965/2294/3815/83871/5880
BP	GO:0021915	neural tube development	145	-0.376851	-1.80837	4.64358e-05	0.00092061	0.00068328	6167	tags=41%, list=25%, signal=31%	317/8985/84314/26005/10959/6422/9968/23654/8323/5727/585/8854/7040/7248/5898/5754/388585/7474/25902/6789/25/55746/2737/6201/64321/55081/4524/7976/653/115908/9620/7798/5914/51339/8321/7289/79600/9355/1856/5216/8463/652/26160/9742/7042/2736/2535/79977/25776/6659/8543/2348/10159/6692/6768/51098/57216/10653/58495/144165
BP	GO:1902107	positive regulation of leukocyte differentiation	145	-0.376668	-1.8075	4.64358e-05	0.00092061	0.00068328	4004	tags=32%, list=16%, signal=27%	3559/2737/399/4254/8767/8546/5457/3071/114548/942/3594/2621/100/387/5914/22985/9760/695/3707/57178/10125/864/7305/4920/6850/54440/2736/3600/6659/2124/54209/140685/939/3122/3059/8111/3635/54997/301/3965/4602/7535/972/6363/3575/51176/4192
BP	GO:1903708	positive regulation of hemopoiesis	145	-0.376668	-1.8075	4.64358e-05	0.00092061	0.00068328	4004	tags=32%, list=16%, signal=27%	3559/2737/399/4254/8767/8546/5457/3071/114548/942/3594/2621/100/387/5914/22985/9760/695/3707/57178/10125/864/7305/4920/6850/54440/2736/3600/6659/2124/54209/140685/939/3122/3059/8111/3635/54997/301/3965/4602/7535/972/6363/3575/51176/4192
BP	GO:0048736	appendage development	160	-0.361077	-1.74398	4.66649e-05	0.00092061	0.00068328	6627	tags=39%, list=26%, signal=29%	23322/1954/8456/5564/3227/22943/10018/2255/84314/2249/26005/8323/5727/8854/3066/6468/257/1749/8434/4154/7474/51222/2697/3238/55212/5396/5915/2737/860/5066/2254/79659/3655/657/5914/2263/7289/2768/3065/652/26160/4920/581/5125/775/9742/7042/7026/79977/4487/6659/1281/2719/51098/3691/80144/65057/6662/9464/6909/27152/51176
BP	GO:0060173	limb development	160	-0.361077	-1.74398	4.66649e-05	0.00092061	0.00068328	6627	tags=39%, list=26%, signal=29%	23322/1954/8456/5564/3227/22943/10018/2255/84314/2249/26005/8323/5727/8854/3066/6468/257/1749/8434/4154/7474/51222/2697/3238/55212/5396/5915/2737/860/5066/2254/79659/3655/657/5914/2263/7289/2768/3065/652/26160/4920/581/5125/775/9742/7042/7026/79977/4487/6659/1281/2719/51098/3691/80144/65057/6662/9464/6909/27152/51176
BP	GO:0001822	kidney development	284	-0.314801	-1.6325	4.74096e-05	0.000926084	0.000687343	4811	tags=31%, list=19%, signal=26%	84062/5754/388585/2828/79902/7474/3070/7484/5314/384/55746/4318/23129/5915/8516/2737/64321/1512/3764/84159/26249/90780/392255/842/9784/8826/7466/79659/5154/3611/255743/387/4435/5914/2263/59/9510/23213/5613/3675/1286/639/2296/403/1285/652/650/581/5125/284/4854/231/80114/7042/596/2736/4358/10252/168002/6659/51196/1910/4070/182/25937/5420/3399/2719/84445/5175/25959/4208/57216/26508/80144/1028/6662/5…
CC	GO:0005911	cell-cell junction	448	-0.280077	-1.52692	4.87606e-05	0.000950104	0.000705171	3615	tags=23%, list=14%, signal=20%	2701/2549/4810/1006/64130/143098/3678/3728/7533/58494/84033/91862/27295/10397/80115/1305/287/4478/8826/5021/1265/5797/9260/84552/4627/1825/71/387/261734/83461/1266/3741/4356/57481/9900/4067/1627/10152/5058/84966/1495/120/284217/23037/27040/23114/6548/29964/126374/6282/10791/302/90952/64236/916/5101/7454/10163/5580/8751/6513/23768/421/288/79977/29091/118/83478/182/125111/30011/9073/150084/1019/291…
BP	GO:0051098	regulation of binding	334	-0.308703	-1.62982	4.90272e-05	0.000952929	0.000707268	5348	tags=36%, list=21%, signal=28%	4931/640/3433/2280/3066/93649/805/10211/7040/9212/64641/129531/55355/51341/3976/5028/84062/8600/114991/25805/4803/7474/3428/6789/6790/25/81857/3662/147138/4318/60/23129/2011/5499/1488/8721/79822/57326/6881/6135/8767/10273/81620/7295/90780/3326/567/5457/6672/5899/3676/56257/51773/2622/124857/4776/5334/1460/55323/4133/115908/1400/1601/4242/5914/808/3955/51339/10155/3646/9355/6612/121665/1454/2296/9…
BP	GO:0001655	urogenital system development	331	-0.30243	-1.59485	4.96763e-05	0.000963154	0.000714857	5362	tags=32%, list=21%, signal=26%	8854/93649/10409/65266/1588/7248/2624/1063/3976/84062/5754/388585/2828/79902/7474/5728/3070/7484/5314/384/55746/4318/23129/5915/8516/2737/64321/1512/3764/84159/26249/90780/2048/392255/842/9784/8826/7466/79659/5154/3611/255743/387/4435/5914/2263/59/9510/23213/5613/3675/1286/639/2296/403/2049/1285/652/650/581/5125/284/1282/4854/231/80114/7042/1396/596/2736/4358/10252/55840/168002/6659/51196/1910/40…
BP	GO:0060402	calcium ion transport into cytosol	150	-0.366223	-1.76708	5.23581e-05	0.00101264	0.000751589	5752	tags=39%, list=23%, signal=31%	2534/6261/9002/5026/5023/2280/805/5788/9187/778/3357/781/845/25/387129/931/3596/5025/2905/6622/5031/22821/2281/6376/3932/287/162514/6373/808/8996/126306/4067/930/255231/1193/55503/55283/3270/581/6717/775/596/857/4283/3627/5335/1535/5144/7070/51393/11151/3710/5777/5587/7220/6363/784/1236/6366
CC	GO:0001772	immunological synapse	40	-0.550975	-2.0685	5.29928e-05	0.0010224	0.000758827	4280	tags=48%, list=17%, signal=39%	396/975/399/3932/4627/3958/214/27040/84433/916/3001/3002/940/3122/923/963/11151/7535/951
BP	GO:0033077	T cell differentiation in thymus	75	-0.455859	-1.96807	5.52699e-05	0.00106371	0.000789488	4587	tags=44%, list=18%, signal=36%	7157/8324/101/2629/80758/2737/8325/567/100/3140/9760/1794/3707/10125/84433/652/916/1235/596/2736/3714/64919/2064/940/11035/6194/915/7535/54361/972/3575/917/1236
BP	GO:0090218	positive regulation of lipid kinase activity	34	-0.591501	-2.12661	5.64936e-05	0.00107953	0.000801233	4107	tags=47%, list=16%, signal=39%	975/5747/1917/388121/4067/930/6714/5156/3815/5155/5587/5159/2261/6363/1236/6366
BP	GO:0061307	cardiac neural crest cell differentiation involved in heart development	15	-0.738075	-2.12588	5.65055e-05	0.00107953	0.000801233	2041	tags=47%, list=8%, signal=43%	1906/652/182/2348/5595/9464/1909
BP	GO:0061308	cardiac neural crest cell development involved in heart development	15	-0.738075	-2.12588	5.65055e-05	0.00107953	0.000801233	2041	tags=47%, list=8%, signal=43%	1906/652/182/2348/5595/9464/1909
MF	GO:0016874	ligase activity	112	0.399969	1.90291	5.70539e-05	0.00108736	0.00080704	4977	tags=43%, list=20%, signal=35%	83737/51703/2729/64087/6296/2180/4522/57176/3981/124454/79731/132949/2752/55157/55236/2618/10588/32/1373/10998/5198/57505/55699/54988/123876/2193/8803/5095/283459/5091/11001/523/23305/254173/3980/348158/80222/10056/197322/3141/92935/27304/8801/8945/284076/23181/2730/440307
BP	GO:0001738	morphogenesis of a polarized epithelium	87	-0.44013	-1.94713	5.86906e-05	0.00111583	0.000828177	6627	tags=54%, list=26%, signal=40%	23322/166336/22943/25876/85407/6259/55966/6422/9968/4919/8323/1951/1952/23245/5754/128272/7474/2295/7484/5314/8324/25/60/1741/7976/4478/115908/71/387/1601/9620/22881/51339/3909/8321/284217/1856/84446/4920/5879/2535/2719/57216/2294/2239/55625/144165
BP	GO:1902622	regulation of neutrophil migration	40	-0.54822	-2.05815	6.01955e-05	0.00113892	0.000845309	3000	tags=45%, list=12%, signal=40%	101/399/3071/683/4267/2526/1906/56833/5879/83700/9353/5880/972/6363/1236/4192/391/6366
BP	GO:0005996	monosaccharide metabolic process	228	0.319605	1.68801	6.01101e-05	0.00113892	0.000845309	5478	tags=38%, list=22%, signal=30%	2819/2729/4041/4122/3170/23516/57486/5167/2584/34/2683/5164/1432/5562/6095/2585/2875/2203/2646/6652/8864/2542/3795/10165/84649/8789/32/5224/10499/5465/3479/1468/229/2582/51181/5236/10891/7124/4124/64080/2822/4837/10269/5208/79660/3101/5105/10580/9963/340990/57818/1642/468/9962/114899/5290/2308/5091/4886/3099/55276/2527/27294/26330/4609/3481/2642/9563/5373/208/2641/84750/5162/5771/1374/23417/6097/…
BP	GO:0010638	positive regulation of organelle organization	420	-0.280342	-1.52102	6.03504e-05	0.0011391	0.000845441	5233	tags=31%, list=21%, signal=25%	51024/5341/54828/7248/9212/5898/27113/346673/7755/3936/255967/9873/7474/51548/7157/55835/10174/9037/6790/6742/25/85477/2241/51100/859/10602/4318/27429/2931/6369/2041/10411/6622/54732/3265/81620/29899/638/5899/10635/80115/55062/51199/274/28964/6376/64151/3071/55023/7039/4478/10300/9696/9662/387/11284/9793/7405/8877/55737/55558/5570/22899/10152/5058/2237/2934/171024/1906/10155/7016/9647/29945/5216/…
BP	GO:0043303	mast cell degranulation	47	-0.524532	-2.05079	6.1001e-05	0.00114585	0.000850458	2202	tags=40%, list=9%, signal=37%	867/6812/4067/695/11314/27040/10125/6284/7462/6813/5293/6850/8673/5730/5294/3965/2294/3815/5880
CC	GO:0071011	precatalytic spliceosome	47	-0.524381	-2.0502	6.1001e-05	0.00114585	0.000850458	6655	tags=60%, list=26%, signal=44%	26121/6627/9129/84950/9128/84844/83443/24148/6637/10946/9343/51634/51691/6636/6628/8449/23450/57819/51690/27258/6629/84811/3550/10992/6633/153527/8175/10262
BP	GO:0002407	dendritic cell chemotaxis	22	-0.652641	-2.1408	6.20262e-05	0.00116032	0.000861191	3357	tags=64%, list=13%, signal=55%	6688/3592/729230/6504/2621/56833/1235/6352/7852/5294/3965/6363/1236/6366
BP	GO:0001906	cell killing	164	-0.353748	-1.71239	6.20672e-05	0.00116032	0.000861191	5204	tags=38%, list=21%, signal=30%	6338/5788/59067/3004/11334/4057/3135/4818/6357/598/1524/3596/3821/911/3811/2208/2209/1512/100507436/3326/6688/567/5551/10666/3071/3592/3151/910/3594/3684/3140/909/1511/3133/127544/3916/9437/10125/1075/913/6813/4069/5532/7305/6850/23207/3136/114836/3105/3002/6156/11035/6223/6372/3122/4068/11151/3106/3965/5777/3134/3575
BP	GO:0034767	positive regulation of ion transmembrane transport	141	-0.372917	-1.78535	6.23735e-05	0.00116327	0.00086338	5489	tags=39%, list=22%, signal=31%	440699/5023/3753/805/65266/57463/8811/781/5724/6833/25/5354/387129/3596/5243/6536/6622/65268/5031/57620/2048/483/6376/3460/287/729230/6373/6347/808/1906/930/6548/7114/59272/581/6717/389816/3306/3779/2539/288/4283/3627/54209/5335/81/7070/54997/1909/57165/27347/1080/7220/784/486
BP	GO:0051651	maintenance of location in cell	193	-0.343494	-1.70071	6.33875e-05	0.00117937	0.000875332	4410	tags=32%, list=18%, signal=26%	25/85477/387129/3596/259266/3638/6622/5031/7295/29899/5552/22821/2281/6672/11344/6376/3932/287/3934/23345/6373/580/808/8996/126306/7405/4067/1627/2934/10945/930/255231/1193/7114/55283/11015/3270/581/6717/775/706/288/857/4283/402/23568/3627/5335/3098/1535/5144/7070/11151/3710/9168/5777/5587/7220/6363/1236/6366
BP	GO:0002448	mast cell mediated immunity	49	-0.527737	-2.08213	6.36123e-05	0.00118075	0.000876355	2202	tags=41%, list=9%, signal=37%	867/6812/4067/695/11314/27040/10125/6284/7462/6813/5293/6850/8673/5730/10417/5294/3965/2294/3815/5880
BP	GO:0002440	production of molecular mediator of immune response	195	-0.340107	-1.68661	6.39879e-05	0.00118491	0.000879445	5715	tags=39%, list=23%, signal=30%	91543/3123/11331/2067/79004/115352/7040/5788/23529/7441/59067/10538/3118/11005/3135/7474/3117/7292/23586/29802/3596/3125/975/4292/3120/684/7098/3119/2048/567/7158/10666/1178/729230/114548/942/6929/6504/958/6810/54106/2821/3133/7186/959/27343/695/8764/7805/8140/26191/5585/117854/284/9466/54440/1235/7042/7293/3105/3112/3098/23075/940/3113/10417/51704/3122/3109/10225/3108/3115/3815/3134/972/3111
BP	GO:0019318	hexose metabolic process	211	0.325305	1.71018	6.4423e-05	0.00119015	0.000883337	5478	tags=38%, list=22%, signal=30%	2819/4041/4122/3170/23516/57486/5167/2584/34/2683/5164/1432/5562/6095/2585/2875/2203/2646/6652/8864/2542/3795/10165/84649/8789/32/5224/10499/5465/3479/1468/229/2582/51181/5236/10891/7124/4124/2822/4837/10269/5208/79660/3101/5105/10580/57818/1642/468/114899/5290/2308/5091/4886/3099/55276/2527/26330/4609/3481/2642/9563/5373/208/2641/84750/5162/5771/1374/23417/6097/5106/5161/5372/5509/7021/7355/5903…
BP	GO:0036503	ERAD pathway	87	0.42419	1.9448	6.54617e-05	0.00119846	0.000889504	6910	tags=46%, list=27%, signal=33%	51439/9354/6400/29979/80267/55768/11160/10613/9097/57003/4121/7415/6048/55432/4189/54788/11124/7844/51136/115290/91445/267/9695/201595/3309/337867/282679/79982/84447/81502/8975/10869/7327/7706/80020/9024/4287/5706/118424/29761
BP	GO:0035107	appendage morphogenesis	129	-0.379761	-1.79497	6.55307e-05	0.00119846	0.000889504	6627	tags=41%, list=26%, signal=30%	23322/1954/3227/22943/10018/2255/84314/2249/26005/8323/5727/8854/3066/6468/257/1749/8434/4154/7474/51222/2697/3238/5396/5915/2737/860/2254/79659/657/2263/7289/2768/3065/652/4920/581/5125/775/9742/7042/79977/4487/6659/1281/2719/51098/80144/65057/6662/9464/6909/27152/51176
BP	GO:0035108	limb morphogenesis	129	-0.379761	-1.79497	6.55307e-05	0.00119846	0.000889504	6627	tags=41%, list=26%, signal=30%	23322/1954/3227/22943/10018/2255/84314/2249/26005/8323/5727/8854/3066/6468/257/1749/8434/4154/7474/51222/2697/3238/5396/5915/2737/860/2254/79659/657/2263/7289/2768/3065/652/4920/581/5125/775/9742/7042/79977/4487/6659/1281/2719/51098/80144/65057/6662/9464/6909/27152/51176
MF	GO:0016747	acyltransferase activity, transferring groups other than amino-acyl groups	163	0.345641	1.75385	6.50321e-05	0.00119846	0.000889504	5031	tags=36%, list=20%, signal=29%	10/6296/51099/284098/38/2752/340562/3931/79575/84649/9588/51304/570/30/27349/39/3030/6342/84869/10449/51114/84287/1387/23464/55140/211/54995/64172/54988/15/84243/123876/8648/157570/92292/64841/1629/116255/54677/79071/1384/10249/8520/348158/1386/7052/138474/4836/79844/8202/55304/8435/3032/55326/80168/1374/55146/653082/6880
BP	GO:0048015	phosphatidylinositol-mediated signaling	158	-0.360339	-1.74407	6.56378e-05	0.00119846	0.000889504	5473	tags=39%, list=22%, signal=31%	4915/84812/10617/2322/5863/23396/3357/5783/5728/5724/113026/56034/8395/5747/25948/653361/5330/4150/9651/5296/5333/6403/375033/5334/5154/4883/3082/867/1906/1436/7301/10125/8678/6714/26051/5293/4920/284/7042/10870/51196/2064/54209/25827/6352/10507/940/5298/23228/3059/5270/219699/5294/6662/5156/3815/5777/5155/5159/80310/1634/113791
BP	GO:1904427	positive regulation of calcium ion transmembrane transport	61	-0.488949	-2.00982	6.64911e-05	0.00120841	0.000896886	6425	tags=52%, list=26%, signal=39%	57158/6262/2149/6769/9002/5023/805/781/25/5354/387129/3596/6622/5031/57620/6376/287/6373/808/930/6548/581/6717/3306/2539/4283/3627/5335/7070/57165/7220/784
BP	GO:0070227	lymphocyte apoptotic process	72	-0.460886	-1.97755	6.64791e-05	0.00120841	0.000896886	4662	tags=43%, list=19%, signal=35%	7474/5728/7157/57864/384/81704/101/3559/2737/5133/1178/100/4067/695/3958/10945/652/5585/581/57181/1831/6352/11035/939/6194/3965/27242/972/84941/3575/917
BP	GO:0090090	negative regulation of canonical Wnt signaling pathway	120	-0.386347	-1.79865	6.67934e-05	0.00121109	0.00089888	3897	tags=30%, list=15%, signal=25%	2931/2737/9978/64321/26524/2010/152573/115908/261734/1601/22881/51339/8313/8321/3065/147906/650/4920/55612/80114/85409/27303/857/25776/92162/25937/2719/84445/2487/27122/6662/5204/4192/3489/6425/144165
BP	GO:0034501	protein localization to kinetochore	13	-0.756795	-2.0997	6.73129e-05	0.0012121	0.000899622	5166	tags=69%, list=21%, signal=55%	9212/55166/55920/81620/7272/9184/3550/9735/10403
BP	GO:1903083	protein localization to condensed chromosome	13	-0.756795	-2.0997	6.73129e-05	0.0012121	0.000899622	5166	tags=69%, list=21%, signal=55%	9212/55166/55920/81620/7272/9184/3550/9735/10403
BP	GO:0006816	calcium ion transport	364	-0.296637	-1.58448	6.70505e-05	0.0012121	0.000899622	4425	tags=27%, list=18%, signal=23%	818/25/5354/859/387129/931/80036/3596/55799/5025/2859/2905/117531/6622/5031/10203/2701/54499/57620/114789/8911/22821/2281/5999/274/6376/3932/287/162514/6373/7466/10800/2621/6347/387/54106/808/8996/126306/3685/150/4067/1906/6236/3958/3603/2669/80228/28954/930/255231/6548/1193/55503/55283/302/8614/55858/3270/581/6717/3306/775/706/596/6387/2539/259232/857/489/4283/1910/3627/57419/5335/6352/1535/5144…
BP	GO:0097048	dendritic cell apoptotic process	10	-0.807925	-2.05495	6.91392e-05	0.00123928	0.000919802	2632	tags=70%, list=10%, signal=63%	2621/4067/6387/3965/6363/1236/6366
BP	GO:2000668	regulation of dendritic cell apoptotic process	10	-0.807925	-2.05495	6.91392e-05	0.00123928	0.000919802	2632	tags=70%, list=10%, signal=63%	2621/4067/6387/3965/6363/1236/6366
BP	GO:0048017	inositol lipid-mediated signaling	161	-0.361167	-1.74716	6.9537e-05	0.00124341	0.000922862	5473	tags=39%, list=22%, signal=31%	4915/84812/10617/2322/5863/23396/3357/5783/5728/5724/113026/56034/8395/5747/25948/653361/5330/4150/9651/5296/5333/6403/388121/375033/5334/5154/4883/3082/867/1906/1436/7301/10125/8678/6714/26051/5293/4920/284/7042/10870/51196/2064/54209/25827/6352/10507/940/5298/23228/3059/5270/219699/5294/6662/5156/3815/5777/5155/5159/80310/1634/113791
MF	GO:0048018	receptor ligand activity	438	-0.279759	-1.52063	6.96867e-05	0.00124341	0.000922862	4502	tags=26%, list=18%, signal=22%	9037/6361/51293/170589/9723/885/7292/7484/6357/116/26281/6374/56034/81029/3596/1314/84432/7869/5623/3640/56920/970/10500/6369/6367/4254/3446/10637/7423/2980/4828/1839/392255/9235/6376/1907/6362/7039/3592/6373/10911/2254/653/5154/2621/1489/8862/6347/944/3082/5228/6019/1511/2821/1906/959/3445/3958/2919/3603/3589/5368/9965/80326/5764/9535/8614/10457/5443/652/650/7076/284207/23768/10505/4049/7042/371…
BP	GO:0007160	cell-matrix adhesion	215	-0.334439	-1.68614	6.98896e-05	0.00124419	0.000923445	5373	tags=39%, list=21%, signal=31%	1012/1021/89/63923/8573/54828/7248/10519/3687/59339/5728/54749/9723/5314/25/3674/81792/7791/8516/5747/55920/2041/64098/3693/3678/3728/158326/27076/1613/3676/3683/6376/1305/3680/5786/3611/683/255743/3684/71/387/3655/8515/3685/83706/9647/54453/3675/5328/3689/3695/9270/7205/6548/6714/347/916/780/10516/8751/55612/5879/596/6281/182/1307/3673/1281/56477/2042/1029/7070/11117/83700/3691/10225/8910/54361/…
CC	GO:0005788	endoplasmic reticulum lumen	280	-0.315121	-1.63079	7.08966e-05	0.00125926	0.000934626	3038	tags=25%, list=12%, signal=22%	1305/10098/1462/3592/11173/1300/3488/7466/5154/2621/79188/8974/85301/81567/285362/5955/54972/1906/8635/255631/1299/1075/1286/51280/1303/1471/3486/1285/1290/8614/652/3270/59272/7076/1277/1282/1291/3915/10491/5768/1289/8404/51246/51738/10418/121506/1298/1307/6696/1281/1284/2719/2882/3912/54587/1296/5595/1278/3490/1293/4240/10272/51148/7373/54361/5155/871/1306/80310/1292
BP	GO:0032720	negative regulation of tumor necrosis factor production	54	-0.49797	-1.99021	7.26762e-05	0.00128795	0.000955919	3097	tags=35%, list=12%, signal=31%	6376/6504/2621/5914/2841/245928/50856/26191/10457/5443/706/9466/51738/54209/23208/3965/5777/2950/947
BP	GO:0055076	transition metal ion homeostasis	126	0.371223	1.80287	7.31908e-05	0.00129414	0.000960515	2993	tags=29%, list=12%, signal=26%	7779/80762/4489/6505/23516/4499/23545/7036/4501/4493/2395/4495/4496/6647/22/351/4494/540/113235/51076/4891/286133/7781/64924/55630/57817/4490/1317/221074/26234/3263/7782/51312/4502/55532/57217/391059
BP	GO:0002577	regulation of antigen processing and presentation	20	-0.681985	-2.16597	7.38425e-05	0.00129474	0.000960963	1678	tags=50%, list=7%, signal=47%	29108/10392/7454/54209/3112/972/6363/3111/1236/6366
BP	GO:0031295	T cell costimulation	44	-0.522779	-2.0198	7.36567e-05	0.00129474	0.000960963	2972	tags=43%, list=12%, signal=38%	3932/942/4067/959/8764/1949/6714/84433/916/857/29851/940/921/5777/100133941/6363/10673/1236/6366
BP	GO:0070098	chemokine-mediated signaling pathway	79	-0.43844	-1.92032	7.34312e-05	0.00129474	0.000960963	4497	tags=43%, list=18%, signal=35%	6361/6357/6374/1524/2859/6369/6367/643/6376/6586/6362/729230/6373/6347/4352/1906/2919/2296/1235/6387/4283/3627/54209/10663/10344/6352/6372/7852/9353/27347/6363/1236/2833/6366
BP	GO:0006694	steroid biosynthetic process	156	0.351627	1.76114	7.38861e-05	0.00129474	0.000960963	6374	tags=47%, list=25%, signal=36%	1595/51422/338/5007/51360/5562/5825/51706/6647/114880/6770/2230/570/11160/10613/51302/116519/6342/6716/80270/1589/1066/7124/8630/10998/10449/1543/1582/3028/3158/3422/6718/1576/5629/8912/23600/6715/3293/114883/51170/5447/4047/11001/1585/1586/2516/3930/1581/84681/335/9563/190/10682/5618/134429/1958/133/10858/6591/8647/7536/3156/10948/64746/5087/50814/3952/50846/3552/79644/1109/64137/23541/1593
BP	GO:0046641	positive regulation of alpha-beta T cell proliferation	22	-0.648965	-2.12874	7.53539e-05	0.00131166	0.00097352	7051	tags=77%, list=28%, signal=56%	10148/7048/3717/51561/5788/7292/975/8767/729230/3133/26191/916/6850/3105/940/3965/7535
BP	GO:0042445	hormone metabolic process	218	0.322191	1.69975	7.53492e-05	0.00131166	0.00097352	6185	tags=44%, list=25%, signal=33%	3295/117247/3416/1803/6777/1592/5781/2690/64577/389434/9718/1544/83875/126/84649/2230/2099/1562/1381/7363/6716/7364/54659/10901/1589/8630/2028/64924/1543/3028/6567/590/59338/10269/130/15/6817/6718/8228/5045/1576/8912/1558/6934/6715/3293/51170/125/51083/3249/5447/8608/3169/27284/6783/6822/1585/1586/2516/147015/127/5959/10720/1577/54577/81555/1522/157506/7276/9563/54884/124/340665/2304/1559/223/195…
MF	GO:0140640	catalytic activity, acting on a nucleic acid	448	0.258198	1.47736	7.52581e-05	0.00131166	0.00097352	7469	tags=39%, list=30%, signal=28%	10146/6594/55703/51091/116447/127253/285605/55520/5888/7156/1763/23405/1776/64216/80324/6832/57176/9937/64794/170506/3981/124454/79731/201626/55157/60528/563/23404/84172/87178/4913/83990/221078/54802/5073/10557/339175/54888/51455/4255/56919/54505/51202/10785/5928/9188/5426/5980/9557/57647/11269/150962/57505/80746/60625/89797/55699/121642/5884/9533/3508/55308/1654/399687/1106/10775/79039/10171/598…
BP	GO:0006586	indolalkylamine metabolic process	11	0.76917	2.06974	7.67172e-05	0.00133243	0.000988934	4050	tags=73%, list=16%, signal=61%	6999/8942/8564/2639/125061/15/23498/130013
MF	GO:0017124	SH3 domain binding	117	-0.389093	-1.80464	7.74762e-05	0.00134264	0.00099651	4410	tags=35%, list=18%, signal=29%	25/10811/60312/92359/8030/653361/80230/842/392/10006/7405/26256/867/9495/8871/4067/10152/57048/5883/10314/51517/10278/26191/6451/9232/916/51466/7454/10657/10163/8751/30011/84251/1535/8506/3059/2530/3635/1809/64780/5777
CC	GO:0060205	cytoplasmic vesicle lumen	303	-0.302357	-1.58347	7.78109e-05	0.00134546	0.000998605	4314	tags=32%, list=17%, signal=27%	6947/51097/25797/1727/114790/5049/5708/10097/10450/6727/1476/29099/1512/3310/7423/78991/3326/6286/7078/3728/5552/567/1621/10493/2171/3934/2717/6709/1265/2760/5154/1460/2621/6036/100/84514/4758/28988/353/3082/1521/81567/1511/2821/10394/175/2934/1794/8635/83706/226/2919/6993/1075/9961/2162/5036/29108/4069/3074/7114/10487/1509/10577/6282/302/9535/5443/79169/7076/5476/5580/58485/7450/3608/64333/4125/…
BP	GO:0015937	coenzyme A biosynthetic process	11	0.768209	2.06716	8.0178e-05	0.00138334	0.00102672	3714	tags=55%, list=15%, signal=47%	38/79646/53354/80347/8034/79877
BP	GO:0002274	myeloid leukocyte activation	210	-0.334898	-1.67741	8.0711e-05	0.00138947	0.00103127	3174	tags=32%, list=13%, signal=29%	2241/1524/3596/3662/6814/5971/7098/6622/399/6688/10397/10666/6376/1907/3460/729230/57580/116071/6504/3684/6810/712/22918/8877/1511/867/10394/6812/4067/1794/695/11314/27040/10125/6284/1075/7462/3689/29108/6813/5293/7305/6850/5580/3430/8673/3600/199/5730/54209/306/8530/6352/6372/23208/914/2896/301/5294/3965/2294/3815/10077/5777/10537/5880/972/6844
MF	GO:0140098	catalytic activity, acting on RNA	274	0.29414	1.59286	8.1004e-05	0.00139146	0.00103275	7097	tags=40%, list=28%, signal=29%	10146/55703/51091/127253/285605/55520/23405/64216/80324/6832/57176/64794/170506/124454/79731/201626/55157/60528/563/23404/84172/87178/83990/221078/54802/5073/10557/339175/54888/56919/54505/51202/10785/9188/57647/11269/150962/57505/80746/60625/55699/9533/3508/55308/1654/10775/79039/10171/60487/55253/25788/7015/2193/81875/283459/54512/115752/11056/9924/1656/11128/51010/6499/6038/80222/4234/10056/51…
BP	GO:0002396	MHC protein complex assembly	20	-0.679505	-2.1581	8.21045e-05	0.00140114	0.00103993	4800	tags=75%, list=19%, signal=61%	3123/3118/3117/3125/3120/3119/567/6892/3112/3113/3122/3109/3108/3115/3111
BP	GO:0002501	peptide antigen assembly with MHC protein complex	20	-0.679505	-2.1581	8.21045e-05	0.00140114	0.00103993	4800	tags=75%, list=19%, signal=61%	3123/3118/3117/3125/3120/3119/567/6892/3112/3113/3122/3109/3108/3115/3111
BP	GO:0045582	positive regulation of T cell differentiation	88	-0.424765	-1.88497	8.18909e-05	0.00140114	0.00103993	6967	tags=53%, list=28%, signal=39%	11006/259307/3458/7048/2625/10385/572/22890/51561/8943/3123/9655/5788/3135/7292/101/3559/2737/399/8767/8546/3071/114548/942/3594/100/387/5914/3707/57178/10125/864/6850/54440/2736/6659/939/3122/301/3965/4602/7535/972/6363/3575/51176/4192
BP	GO:0031667	response to nutrient levels	406	0.268091	1.51411	8.45155e-05	0.00143915	0.00106814	5092	tags=30%, list=20%, signal=24%	8942/664/10634/2729/51422/255738/3170/1981/594/178/54407/2180/34/5164/9131/1432/1592/2690/5562/154/38/2875/6647/2752/6652/5444/6581/80315/2626/6653/2153/1965/490/9388/847/96459/6532/83990/32/220441/5465/6198/2155/53632/4255/3358/10891/1373/81929/3171/6716/7124/30849/1543/1582/27327/3158/590/55630/57817/6554/5313/2693/9681/383/90226/5179/5105/8648/3949/5292/58528/80010/5629/26263/7442/9463/9474/67…
MF	GO:0003707	nuclear steroid receptor activity	23	0.65199	2.22029	8.48148e-05	0.00144112	0.0010696	4283	tags=61%, list=17%, signal=51%	7181/10424/81285/5465/2099/2103/2101/7101/2104/6258/6256/2908/6257/11057
BP	GO:0070588	calcium ion transmembrane transport	267	-0.305131	-1.56453	8.61218e-05	0.00146016	0.00108373	4899	tags=30%, list=19%, signal=25%	778/5142/116443/3357/781/845/25/5354/859/387129/80036/3596/55799/5025/2859/2905/117531/6622/5031/54499/57620/114789/8911/22821/2281/274/6376/3932/287/162514/6373/2621/54106/808/8996/126306/3685/150/4067/1906/6236/2669/80228/28954/930/255231/6548/1193/55503/55283/302/55858/3270/581/6717/3306/775/2539/259232/489/4283/1910/3627/57419/5335/1535/5144/7070/51393/11151/5294/3710/1909/57165/5777/5587/722…
MF	GO:0008191	metalloendopeptidase inhibitor activity	16	-0.718181	-2.0944	8.74067e-05	0.00147874	0.00109753	4703	tags=69%, list=19%, signal=56%	8434/4803/684/7078/124857/1285/7076/7077/5918/9806/56925
BP	GO:0030888	regulation of B cell proliferation	61	-0.484389	-1.99107	8.81389e-05	0.00148791	0.00110434	5517	tags=51%, list=22%, signal=40%	640/115352/5788/23529/59067/51293/3596/975/2048/952/3071/683/100/958/54106/4067/695/11314/84433/7305/5585/54440/596/57181/7293/1493/4208/3635/27242/972/10673
BP	GO:0002279	mast cell activation involved in immune response	49	-0.523841	-2.06676	8.90568e-05	0.00150018	0.00111344	2202	tags=41%, list=9%, signal=37%	867/6812/4067/695/11314/27040/10125/6284/7462/6813/5293/6850/8673/5730/5294/3965/2294/3815/5777/5880
BP	GO:1901607	alpha-amino acid biosynthetic process	63	0.458354	1.97332	9.3428e-05	0.00156503	0.00116157	4599	tags=48%, list=18%, signal=39%	55256/5053/441024/4522/84105/4552/64902/2752/22928/875/2746/6470/2806/1373/1719/10157/29968/26227/4507/256987/5092/435/5352/6472/22929/189/10994/60496/11315/23743
MF	GO:0020037	heme binding	124	0.372712	1.80957	9.34099e-05	0.00156503	0.00116157	6576	tags=45%, list=26%, signal=34%	6999/1595/57834/10424/1592/4051/3052/1544/124936/1573/57404/875/847/64816/1557/51302/1562/1589/1543/6391/1582/284541/1579/1576/1558/6392/1572/54205/23593/1591/1555/3273/1585/1528/259/1586/55640/1577/1581/4151/10857/340665/1571/1559/66002/10858/51078/53905/54905/4846/80142/199974/1593/1553/3162/4842
BP	GO:0002831	regulation of response to biotic stimulus	314	-0.299616	-1.57124	9.35065e-05	0.00156503	0.00116157	6022	tags=36%, list=24%, signal=27%	26065/57169/3822/9111/51561/2534/7804/9683/3123/338322/10875/7409/9447/84166/805/9698/4940/59067/10906/2219/55198/4057/11005/7128/3135/7474/3428/11140/384/5654/23586/51311/3821/103/9450/101/4064/3125/79102/653361/90933/8767/100507436/9782/3326/6688/56339/4277/55601/80212/10666/6376/3592/3594/3140/245928/3133/4067/5058/81030/4841/7376/3916/64170/7301/9437/10125/55072/9636/29108/26191/6714/1690/298…
BP	GO:0001523	retinoid metabolic process	79	0.417561	1.872	9.42873e-05	0.00157139	0.00116629	5806	tags=48%, list=23%, signal=37%	1592/64577/1544/83875/126/84649/24/1562/317749/1381/54659/10901/1543/130/8228/128/1576/1558/5919/125/8608/222236/4036/147015/127/5959/1577/54577/4035/157506/7276/54884/124/340665/8694/216/54905/5950
BP	GO:0007162	negative regulation of cell adhesion	258	-0.312526	-1.60056	9.42498e-05	0.00157139	0.00116629	5225	tags=34%, list=21%, signal=27%	7040/8573/54828/5788/91663/5598/5365/3135/5728/1545/9037/9723/7292/8324/25/384/396/84695/23129/3559/5747/2737/55920/2048/6688/56339/8654/6376/6441/3071/942/387/1511/55558/55824/11314/3958/9404/9647/79872/8764/57045/7805/864/9270/2192/26191/6714/80709/347/10457/652/650/79679/284/1277/54900/5580/8751/6387/5361/168002/114897/2064/4070/182/1493/81/56477/10507/23075/5420/1029/397/2615/83700/5270/135/3…
BP	GO:0014020	primary neural tube formation	90	-0.423632	-1.89124	0.000102744	0.00170794	0.00126764	5948	tags=47%, list=24%, signal=36%	10959/6422/9968/23654/8323/5727/585/7040/7248/5898/5754/7474/25902/25/6201/55081/4524/7976/653/115908/9620/7798/5914/8321/7289/9355/1856/5216/8463/652/26160/7042/2535/79977/8543/2348/6692/6768/57216/10653/58495/144165
BP	GO:0050864	regulation of B cell activation	114	-0.394254	-1.81711	0.000102917	0.00170794	0.00126764	5517	tags=43%, list=22%, signal=34%	640/115352/7040/5788/23529/59067/7128/51293/7292/3596/975/4292/64092/2048/7158/952/3071/683/100/958/54106/55024/4067/695/11314/7805/930/84433/56833/7305/5585/6850/9466/54440/3543/596/57181/7293/1493/30011/940/939/4208/3635/5777/27242/374403/972/10673
CC	GO:0045121	membrane raft	304	-0.299115	-1.56716	0.000103216	0.00170928	0.00126863	3129	tags=24%, list=12%, signal=21%	10666/3751/10630/3932/287/5538/476/84790/3684/657/90249/51090/909/3741/5740/867/9495/7186/8871/4067/695/55824/1495/23213/23433/824/27040/7462/10287/4641/3689/930/7851/130574/6548/6714/1509/84433/302/285704/59272/284/6513/150696/857/30846/1910/4118/6281/54209/8717/3098/5420/5175/7070/925/3945/914/5595/3635/219699/973/6442/2771/682/7535/2026/962/871/100133941/83483/25999
BP	GO:0002449	lymphocyte mediated immunity	269	-0.308669	-1.58482	0.000103886	0.00171675	0.00127418	5225	tags=37%, list=21%, signal=30%	7040/733/5788/23529/2207/59067/10538/3004/3118/10384/3135/3117/4818/7292/51311/3821/911/3811/3125/2208/975/970/4292/3120/2209/1512/100507436/3119/567/7158/5551/10666/3071/1178/3592/729230/114548/910/3594/6504/958/712/50615/3140/11118/909/3133/127544/7186/959/695/3916/64170/9437/10125/1075/10312/930/913/713/5532/7454/5580/84174/9466/54440/3543/4049/1235/64005/23207/3136/114836/54209/182/3105/3112/…
BP	GO:0002504	antigen processing and presentation of peptide or polysaccharide antigen via MHC class II	31	-0.587155	-2.06595	0.00010425	0.00171809	0.00127517	5985	tags=65%, list=24%, signal=49%	5641/3123/2207/3118/3117/3125/3120/3119/567/29108/1509/54209/3112/3113/3122/3109/3108/3115/972/3111
BP	GO:0070527	platelet aggregation	64	-0.461691	-1.9325	0.000104406	0.00171809	0.00127517	4404	tags=47%, list=18%, signal=39%	5912/3043/60/6814/2778/3315/23173/10630/375033/4627/3611/71/1511/4352/6812/4067/1465/83706/7301/6850/5580/114897/84034/10398/5270/5294/5156/10077/5777/1192
BP	GO:0035148	tube formation	144	-0.376055	-1.7979	0.000105629	0.00173457	0.00128741	6359	tags=44%, list=25%, signal=33%	4781/7849/10018/317/2255/153090/10959/6422/9968/23654/8323/5727/585/7040/54828/7248/5898/5754/388585/7474/25902/8820/6789/7484/25/6201/55081/4524/7976/653/115908/7534/9620/7798/5914/2263/8321/7289/79600/9355/1856/5216/9270/8463/5293/652/26160/7042/2535/79977/6659/8543/2348/5420/6692/6768/51098/57216/6662/54361/10653/58495/144165
BP	GO:0097553	calcium ion transmembrane import into cytosol	134	-0.366287	-1.73978	0.000106441	0.00174425	0.00129459	5752	tags=40%, list=23%, signal=31%	2534/6261/9002/5023/2280/805/5788/9187/778/3357/781/845/25/387129/3596/2905/6622/5031/22821/2281/6376/3932/287/162514/6373/808/8996/126306/4067/930/255231/1193/55503/55283/3270/581/6717/775/4283/3627/5335/1535/5144/7070/51393/11151/3710/5777/5587/7220/6363/1236/6366
BP	GO:0060828	regulation of canonical Wnt signaling pathway	219	-0.329773	-1.66032	0.000107412	0.00175648	0.00130367	6165	tags=39%, list=25%, signal=30%	63977/2255/153090/85407/25928/6422/6478/7480/8323/7088/219771/57680/63923/7040/284654/1749/5754/25805/8434/7474/10076/9037/6789/8324/9839/259266/2931/5499/2737/9978/64321/65268/3728/1613/26524/2010/152573/2254/3611/115908/261734/1601/22881/252839/55737/51339/8313/2263/8321/1454/8796/59352/130574/3065/6714/1455/147906/5300/650/4920/1277/55612/80114/85409/27303/857/25776/6659/92162/25937/6206/1501/…
BP	GO:0046688	response to copper ion	35	0.567247	2.13774	0.000111511	0.00181972	0.0013506	2520	tags=49%, list=10%, signal=44%	4489/4499/4501/4493/4495/4496/6647/6652/3931/351/4494/540/359/1543/4490/15/4502
BP	GO:0072012	glomerulus vasculature development	26	-0.614857	-2.08964	0.000113755	0.00184864	0.00137207	2100	tags=46%, list=8%, signal=42%	59/652/284/4854/5175/5156/1909/5155/6943/5159/80310/947
BP	GO:0050871	positive regulation of B cell activation	71	-0.448902	-1.92127	0.000113523	0.00184864	0.00137207	5379	tags=46%, list=21%, signal=37%	115352/7040/5788/23529/59067/51293/7292/3596/975/4292/2048/7158/952/3071/683/100/958/54106/695/84433/6850/54440/3543/596/57181/7293/30011/940/939/4208/3635/972/10673
CC	GO:0030666	endocytic vesicle membrane	188	-0.33339	-1.65278	0.000117029	0.00189791	0.00140863	4916	tags=36%, list=20%, signal=29%	51715/55198/10981/9367/3118/3135/7474/3117/818/22905/81029/3125/6891/533/3120/2209/81035/3119/23682/1839/567/554/50489/7039/51762/6810/4074/8992/11031/1173/3133/4067/80223/84329/3916/10312/6233/4920/59272/6892/51209/2535/8673/6890/857/3136/3105/306/6456/84251/1535/3113/3122/338382/11151/915/3115/3106/54361/1080/83871/5880/3134/972/6844/9341/3575/917
BP	GO:0031345	negative regulation of cell projection organization	166	-0.347679	-1.69113	0.000118044	0.00191041	0.00141791	6790	tags=43%, list=27%, signal=32%	79598/2043/5217/6695/84260/1785/5621/51225/9706/22943/9139/2664/6259/2534/115704/6405/54437/2670/3066/9856/7248/10519/65078/5365/84062/112/10371/7474/5728/9037/9723/7869/56920/10500/2048/7533/57489/567/952/4776/4133/26052/1400/387/1601/55558/7016/117177/3675/1949/51466/393/5580/10505/83478/4070/1902/64218/6696/10507/2672/7070/5376/7431/1809/53335/9353/29116/7025/11075/81618/6366
BP	GO:0031269	pseudopodium assembly	12	-0.777854	-2.09071	0.000118577	0.00191508	0.00142138	291	tags=42%, list=1%, signal=41%	148170/3815/23580/1236/6366
CC	GO:0098576	lumenal side of membrane	33	-0.56916	-2.02738	0.000120017	0.00192725	0.00143041	4800	tags=58%, list=19%, signal=47%	3118/3135/3117/3125/3120/3119/3133/10134/121665/6892/5476/3136/3105/3113/3122/3115/3106/3134/972
BP	GO:1904064	positive regulation of cation transmembrane transport	128	-0.380462	-1.80019	0.000120069	0.00192725	0.00143041	5489	tags=40%, list=22%, signal=31%	440699/5023/3753/805/65266/57463/8811/781/6833/25/5354/387129/3596/6536/6622/65268/5031/57620/2048/483/6376/3460/287/729230/6373/6347/808/1906/930/6548/7114/59272/581/6717/389816/3306/3779/2539/288/4283/3627/54209/5335/81/7070/54997/1909/57165/7220/784/486
BP	GO:0010594	regulation of endothelial cell migration	155	-0.358016	-1.73222	0.000120069	0.00192725	0.00143041	5225	tags=35%, list=21%, signal=28%	7040/54828/2624/10519/7474/23598/10016/9037/25/57381/5025/5747/3315/161742/55466/3728/6672/5797/22846/1460/6776/958/387/51157/147372/2821/1906/27286/54453/2113/25865/9270/7114/5764/5293/652/284/5879/7026/64094/306/64218/5335/4208/2896/301/5294/7424/9353/5155/5587/1634/6237/6678
BP	GO:0050857	positive regulation of antigen receptor-mediated signaling pathway	19	-0.68611	-2.14642	0.000121654	0.00194473	0.00144338	4107	tags=68%, list=16%, signal=57%	5788/975/10666/3932/100/50852/25865/84433/5583/57181/6188/123920/1236
BP	GO:0007608	sensory perception of smell	392	0.270204	1.52011	0.000121411	0.00194473	0.00144338	8916	tags=44%, list=35%, signal=29%	144125/391194/81285/150681/219958/219983/123041/390067/346517/401992/81469/119687/138883/341359/403282/89797/26683/219957/219431/219493/79501/56656/403257/347169/26529/440153/390075/390321/392309/283160/283092/138803/390037/8392/391112/81697/26219/442186/341416/441933/390077/119682/138882/138802/441911/390883/126541/119679/26648/282763/390199/119774/8390/401993/343406/127385/219870/219954/338675/…
CC	GO:0034774	secretory granule lumen	300	-0.301903	-1.57726	0.000122389	0.00195249	0.00144915	4548	tags=32%, list=18%, signal=26%	6947/51097/25797/1727/114790/5049/5708/10097/10450/6727/1476/29099/1512/3310/7423/78991/3326/6286/7078/3728/5552/567/1621/10493/2171/3934/2717/6709/1265/2760/5154/1460/2621/6036/84514/4758/28988/353/3082/1521/81567/1511/2821/10394/175/2934/1794/8635/83706/226/2919/6993/1075/9961/2162/5036/29108/4069/3074/7114/10487/1509/10577/6282/302/9535/5443/79169/7076/5476/5580/58485/7450/3608/64333/4125/7042…
MF	GO:0030545	signaling receptor regulator activity	472	-0.275528	-1.50813	0.000123263	0.00196244	0.00145653	4502	tags=25%, list=18%, signal=21%	9037/6361/51293/170589/9723/885/7292/7484/6357/116/26281/6374/56034/81029/3596/1314/84432/7869/5623/3640/56920/4062/970/10500/6369/6367/4254/3446/10637/7423/2980/4828/1839/392255/9235/6376/1907/6362/7039/124857/3592/6373/10911/2254/653/5154/2621/1489/8862/1609/6347/944/3082/5228/6019/1511/2821/1906/959/3445/3958/2919/3603/3589/116372/5368/9965/130574/80326/5764/9535/8614/10457/5443/652/650/7076/2…
CC	GO:0030667	secretory granule membrane	281	-0.30743	-1.59324	0.000124974	0.00198162	0.00147076	5218	tags=34%, list=21%, signal=27%	84443/53917/5788/23218/2207/6402/147744/138050/8972/3687/81619/858/5724/64753/5912/3674/10970/54509/170482/51382/101/684/4973/6622/5284/3382/5066/6793/4126/952/1621/64518/3683/762/1650/5799/6515/353376/3071/6403/8826/2171/965/5869/6518/683/21/3684/387/6843/8655/22918/11031/3685/6616/11322/84329/79895/11314/3958/3916/10312/5328/3689/23114/11336/5269/23385/57153/7305/6717/11010/10257/5879/961/51209…
MF	GO:0030546	signaling receptor activator activity	445	-0.27588	-1.5017	0.000124787	0.00198162	0.00147076	4502	tags=26%, list=18%, signal=21%	9037/6361/51293/170589/9723/885/7292/7484/6357/116/26281/6374/56034/81029/3596/1314/84432/7869/5623/3640/56920/970/10500/6369/6367/4254/3446/10637/7423/2980/4828/1839/392255/9235/6376/1907/6362/7039/3592/6373/10911/2254/653/5154/2621/1489/8862/1609/6347/944/3082/5228/6019/1511/2821/1906/959/3445/3958/2919/3603/3589/5368/9965/80326/5764/9535/8614/10457/5443/652/650/7076/284207/23768/10505/4049/704…
BP	GO:0002495	antigen processing and presentation of peptide antigen via MHC class II	29	-0.601396	-2.10382	0.000127391	0.00201587	0.00149619	5985	tags=69%, list=24%, signal=53%	5641/3123/2207/3118/3117/3125/3120/3119/567/29108/1509/54209/3112/3113/3122/3109/3108/3115/972/3111
CC	GO:0030670	phagocytic vesicle membrane	73	-0.454652	-1.95265	0.000127815	0.00201849	0.00149813	4916	tags=45%, list=20%, signal=36%	51715/55198/10981/9367/3135/6891/533/23682/567/51762/6810/8992/11031/3133/80223/84329/3916/10312/6892/51209/8673/6890/3136/3105/306/1535/338382/11151/3106/83871/5880/3134/9341
BP	GO:0010043	response to zinc ion	51	0.483287	1.98357	0.000128434	0.00202215	0.00150085	3375	tags=43%, list=13%, signal=37%	7779/4489/4499/4501/4493/4495/4496/3795/4494/1373/7781/64924/57817/4490/5027/383/15/7782/4502/55532/142/23498
BP	GO:0071559	response to transforming growth factor beta	233	-0.319242	-1.62111	0.000128563	0.00202215	0.00150085	5348	tags=39%, list=21%, signal=31%	4015/54778/9392/9141/4091/409/317/63976/6498/94/6422/2534/2280/3066/93649/7040/5598/94031/283149/51341/55198/25805/858/7474/27063/7157/25/859/9839/5654/1524/7791/8516/5747/3693/4093/161742/10637/10273/3326/6688/25878/26524/124857/10755/5154/255743/4435/1601/79674/657/2263/1906/9404/8483/57178/3675/57045/864/80326/114990/6714/5300/650/2734/2022/1277/55612/7042/10252/857/1281/2348/1284/4208/11117/2…
BP	GO:0006956	complement activation	53	0.48949	2.03309	0.00013058	0.00203762	0.00151233	2793	tags=45%, list=11%, signal=40%	731/2220/727/735/729/8547/10747/325/732/721/3075/720/3078/5199/629/1191/722/718/715/81494/716/717/725/51279
BP	GO:2000107	negative regulation of leukocyte apoptotic process	47	-0.510497	-1.99591	0.000130847	0.00203762	0.00151233	4375	tags=43%, list=17%, signal=35%	57864/384/81704/4254/2621/100/3707/652/6387/57181/1831/6352/939/3059/972/6363/84941/3575/1236/6366
BP	GO:0030593	neutrophil chemotaxis	95	-0.411652	-1.8509	0.000129916	0.00203762	0.00151233	3097	tags=35%, list=12%, signal=31%	6376/1907/3071/6362/3680/6373/57580/683/6347/1906/3958/2919/3689/5293/6850/5879/7042/4283/3627/10344/6352/51192/6372/83700/5294/682/9353/5880/972/6363/1236/4192/6366
BP	GO:0097485	neuron projection guidance	223	-0.323186	-1.63568	0.000130777	0.00203762	0.00151233	4926	tags=31%, list=20%, signal=25%	5365/1749/10371/7474/4684/474/9037/9723/7869/56920/2596/23129/2044/285220/10500/5747/2737/2041/399/2048/91653/3800/7976/6586/3199/1123/5797/1400/90249/55558/3909/3918/1906/1436/23022/214/9355/284217/59352/23114/1949/2049/10570/347733/4854/5879/23768/10505/6152/2736/6387/64919/152330/5361/2064/64218/2042/10507/4756/91624/1808/219699/682/1909/9353/5880/391/3908/2051
BP	GO:0010817	regulation of hormone levels	453	0.254851	1.45963	0.000130218	0.00203762	0.00151233	5485	tags=34%, list=22%, signal=27%	3172/3295/8723/117247/25924/4041/1393/3416/3170/23516/18/2243/5007/7036/1803/6777/1592/5781/2690/9501/64577/389434/23428/2752/9718/1544/83875/8864/11069/2266/55585/28231/1394/126/84649/2230/2746/2099/3358/1562/1381/5894/7363/6845/6716/7364/54659/10901/1589/3033/8773/7124/8630/2028/64924/1543/3028/2822/114571/6567/590/59338/2693/10269/5581/5208/4826/130/15/6817/6718/91608/4824/399979/8228/5045/157…
BP	GO:0046364	monosaccharide biosynthetic process	71	0.441949	1.95039	0.000132168	0.00205411	0.00152457	6424	tags=52%, list=26%, signal=39%	2819/23516/57486/34/5164/2875/2203/6652/8864/2542/10165/84649/8789/5224/5465/1468/5236/10891/4837/5105/57818/1642/468/114899/2308/5091/2641/5771/5106/5903/84912/5950/3952/1407/5207/4485/27232
BP	GO:0007606	sensory perception of chemical stimulus	449	0.257882	1.47647	0.000133574	0.00207186	0.00153774	8274	tags=40%, list=33%, signal=27%	144125/948/563/391194/81285/150681/219958/219983/123041/390067/344892/346517/401992/81469/119687/138883/50840/341359/403282/89797/26683/132112/219957/219431/219493/79501/56656/403257/347169/26529/440153/390075/3933/390321/392309/283160/283092/138803/7442/8989/390037/8392/391112/29850/81697/26219/442186/341416/441933/390077/119682/138882/138802/441911/5024/259289/390883/126541/119679/26648/282763/…
BP	GO:0046638	positive regulation of alpha-beta T cell differentiation	48	-0.519468	-2.0349	0.000138835	0.00214921	0.00159515	5866	tags=52%, list=23%, signal=40%	51561/8943/3123/9655/7292/2737/8767/8546/3071/114548/942/3594/100/387/5914/3707/864/6850/54440/3122/301/3965/4602/7535/6363
MF	GO:0009055	electron transfer activity	102	0.390953	1.83062	0.000139162	0.00215001	0.00159575	4375	tags=35%, list=17%, signal=29%	29958/51022/4718/2110/1327/4720/5860/4719/2936/1544/2230/6390/8659/217/8630/26227/6391/314/128/2109/6715/6392/54205/374291/4702/5447/23498/8608/6389/4729/2731/1528/4129/2108/4731/4707
BP	GO:0001837	epithelial to mesenchymal transition	142	-0.370423	-1.77364	0.000139761	0.00215501	0.00159946	2694	tags=25%, list=11%, signal=22%	653/1601/3082/8313/2263/1906/10155/55273/2296/114990/147906/80709/652/650/2022/1277/8751/7042/10252/4487/182/25937/23187/2042/26508/23275/6275/10439/6662/1909/54361/58495/51176/4192/7041
MF	GO:0016712	oxidoreductase activity, acting on paired donors, with incorporation or reduction of molecular oxygen, reduced flavin or flavoprotein as one donor, and incorporation of one atom of oxygen	38	0.536793	2.06912	0.000140838	0.00216311	0.00160547	7322	tags=68%, list=29%, signal=49%	57834/4051/1544/1573/64816/1557/51302/1562/1543/1579/1576/1558/1572/51004/1555/1577/1581/1571/1559/66002/54905/199974/1553/3162/3163/8529
BP	GO:0032365	intracellular lipid transport	38	0.536793	2.06912	0.000140838	0.00216311	0.00160547	4988	tags=50%, list=20%, signal=40%	255738/5007/788/19/5825/81537/440026/6770/6342/219931/1066/3949/4040/84725/54762/26154/1374/5826/134429
MF	GO:0008514	organic anion transmembrane transporter activity	172	0.330527	1.68991	0.00014226	0.00218068	0.00161851	4800	tags=36%, list=19%, signal=29%	10478/94081/6505/54407/284439/23443/120103/23428/948/375611/284111/6581/1244/79751/6573/28231/10165/85320/113235/6582/23169/55244/1468/9429/94097/291/6514/114571/256987/159963/6529/133482/28234/246213/10864/6520/6542/8402/9963/83733/153129/118980/6506/9962/9197/115111/6521/5172/51000/1497/6579/57282/10599/387700/11136/4948/9356/57835/6534/253512/6566/8884
MF	GO:0016705	oxidoreductase activity, acting on paired donors, with incorporation or reduction of molecular oxygen	138	0.35201	1.7286	0.000145248	0.00222212	0.00164926	5052	tags=35%, list=20%, signal=28%	1595/5053/57834/8564/1592/4051/84105/5264/1544/1573/57404/55217/64816/200424/1557/51302/1562/1589/1543/1582/121642/5092/284541/1579/6718/1576/8424/1558/1572/5352/51004/5447/254295/1591/1555/1585/1586/2330/2329/1577/1581/121278/83475/340665/1571/1559/66002/10858
BP	GO:0033209	tumor necrosis factor-mediated signaling pathway	93	-0.422736	-1.88763	0.000145607	0.00222327	0.00165012	2841	tags=30%, list=11%, signal=27%	22954/3611/2621/149951/8996/7188/8877/10670/7186/8764/7805/29108/8784/7114/608/2874/6850/7293/8717/81/834/6772/8718/55504/2950/83483/10673/83643
BP	GO:0006575	cellular modified amino acid metabolic process	169	0.332683	1.69677	0.000146657	0.00223495	0.00165879	5187	tags=41%, list=21%, signal=33%	494143/2729/2346/29958/117247/2643/6505/8876/441024/501/34/4522/8836/51022/4552/389434/6647/2936/2618/2954/6573/10588/2940/10841/2739/55217/6470/113235/2806/8659/1719/10840/2628/256987/6567/1757/33/26873/8424/51365/2939/6506/5352/3029/6472/3249/5447/54677/50487/221357/1384/27284/114882/1497/6822/471/2679/23474/51268/60496/51449/11315/23743/2304/1374/2730/223/1428/25974
BP	GO:0002285	lymphocyte activation involved in immune response	184	-0.335965	-1.65912	0.000149901	0.00227995	0.00169218	5709	tags=40%, list=23%, signal=31%	159296/3123/2067/9655/28514/10875/7040/7248/5788/23529/1015/2207/59067/10538/3936/4818/7157/7292/25/5734/911/84695/3662/4064/975/5971/4292/8320/3446/8767/6688/55619/139818/7158/3683/26022/3071/114548/942/3594/100/958/4242/5914/3955/4063/959/3445/3958/3916/930/5450/9466/1235/257101/114836/64218/23075/940/23228/6194/3122/3109/11151/55846/301/9452/3965/4602/3134/972/6363/51176/4192
BP	GO:0070228	regulation of lymphocyte apoptotic process	54	-0.48499	-1.93834	0.000150214	0.00228028	0.00169243	4662	tags=44%, list=19%, signal=36%	7474/5728/7157/57864/384/81704/101/5133/100/4067/695/3958/652/581/57181/1831/6352/11035/939/3965/972/84941/3575/917
BP	GO:0090181	regulation of cholesterol metabolic process	30	0.576025	2.08347	0.000151478	0.00229502	0.00170337	4272	tags=47%, list=17%, signal=39%	338/51360/5562/6647/84649/11160/10613/1066/33/3949/5447/37/2330/1581
BP	GO:0010038	response to metal ion	333	0.277706	1.53653	0.000152319	0.00230331	0.00170953	2970	tags=23%, list=12%, signal=21%	664/7779/2729/4489/1393/144402/85365/6505/673/6857/4499/18/1147/2243/8913/8893/7036/1956/4501/4493/2395/4495/5562/3981/4496/6647/2203/6652/375611/284111/1544/3931/929/10105/2266/3795/1965/351/4494/847/10165/540/5224/4734/1373/359/4891/7781/91683/5516/64924/5176/1543/341359/2822/3158/4547/56670/57817/6529/4490/5027/5313/383/15/825/7782/5179/107/4502/55532/8912/9474/7015/10243/468/142/2244
BP	GO:0051216	cartilage development	176	-0.34139	-1.67649	0.000153403	0.00231078	0.00171507	4777	tags=31%, list=19%, signal=25%	388585/7474/51222/85477/81029/81792/2121/5396/5915/22856/54360/2737/860/57326/3213/392255/55790/11173/2254/653/657/5914/85301/8313/1906/23213/3202/7298/864/4146/3221/7067/652/650/4920/2734/7076/1277/2202/4487/51738/64764/1281/4208/2487/633/5595/4209/6662/9464/4256/871/2261/4192/1513
BP	GO:0043270	positive regulation of ion transport	250	-0.315442	-1.60817	0.000153403	0.00231078	0.00171507	5841	tags=36%, list=23%, signal=28%	6769/22930/9002/5026/6781/440699/5023/3753/2550/805/65266/8573/57463/8811/5028/84062/8600/6331/781/5724/6833/25/5354/5865/387129/3596/5243/6536/6330/5025/6622/4302/65268/5031/57620/2048/483/6376/3460/22925/287/729230/162514/6373/7466/6347/134/808/553/6812/150/1906/3958/930/6548/9536/7114/59272/581/6717/389816/3306/706/3779/6387/2539/8673/288/857/4283/23171/6558/3627/54209/5335/81/6352/7070/51393/…
CC	GO:0101002	ficolin-1-rich granule	176	-0.341221	-1.67566	0.000157034	0.00236093	0.00175229	5148	tags=41%, list=20%, signal=33%	140885/2992/2495/5686/2799/124583/10875/23218/2207/2219/8972/3687/1938/10092/25797/3043/170482/101/5049/4318/5708/10097/10450/6727/1476/29099/1512/3310/3326/3728/5799/6515/11333/3071/965/1460/387/28988/823/8655/22918/2821/2934/226/11314/3958/3916/6993/9961/10312/3689/23114/427/1471/1509/5269/23412/9535/79169/5879/4048/3608/83716/1915/7077/10120/10159/51646/3614/3615/374403/2950
MF	GO:0016830	carbon-carbon lyase activity	42	0.509614	1.99591	0.00016078	0.00241262	0.00179065	6756	tags=55%, list=27%, signal=40%	4337/3155/593/229/1644/55862/51071/5105/26061/55253/2677/171425/262/51380/1586/130013/23417/5106/51582/10606/1652/7389/80896
BP	GO:0071466	cellular response to xenobiotic stimulus	162	0.338184	1.71571	0.000161107	0.00241291	0.00179087	5408	tags=39%, list=21%, signal=31%	3172/196/10/1393/316/2180/1592/284996/5562/6095/2203/5446/1544/1573/2940/6799/1557/30/1562/6283/1644/54659/8856/1543/2822/6554/314/6817/13/4824/23491/1576/445329/7172/1558/1572/2939/55270/5447/221357/1555/10249/27284/6822/348158/54657/2330/79001/2329/3309/10720/1577/4609/54577/134147/1571/1559/66002/6097/10858/6818/8647/3351
BP	GO:0019883	antigen processing and presentation of endogenous antigen	26	-0.607515	-2.06469	0.000163848	0.00243533	0.00180751	4673	tags=69%, list=19%, signal=56%	3135/911/6891/64167/567/910/909/3133/913/23457/6892/6890/3136/3105/3122/3106/3134/972
BP	GO:0035493	SNARE complex assembly	13	-0.736358	-2.043	0.000162987	0.00243533	0.00180751	3733	tags=77%, list=15%, signal=66%	6622/6810/6843/7405/6812/6804/8673/29091/6844/9341
BP	GO:0032640	tumor necrosis factor production	150	-0.352722	-1.70194	0.000163797	0.00243533	0.00180751	5942	tags=40%, list=24%, signal=31%	114900/943/140885/51561/566/3459/3066/4940/5788/4057/7128/7474/5724/6833/384/1524/23586/7098/3315/8767/2048/6376/729230/4776/6504/2621/5914/54106/2841/245928/50856/3133/4939/64170/10125/29108/26191/10457/5443/7305/10392/284/6850/706/9466/54440/961/51738/54209/23643/1535/10417/23208/914/3965/5777/2950/6363/9181/947
BP	GO:0032680	regulation of tumor necrosis factor production	150	-0.352722	-1.70194	0.000163797	0.00243533	0.00180751	5942	tags=40%, list=24%, signal=31%	114900/943/140885/51561/566/3459/3066/4940/5788/4057/7128/7474/5724/6833/384/1524/23586/7098/3315/8767/2048/6376/729230/4776/6504/2621/5914/54106/2841/245928/50856/3133/4939/64170/10125/29108/26191/10457/5443/7305/10392/284/6850/706/9466/54440/961/51738/54209/23643/1535/10417/23208/914/3965/5777/2950/6363/9181/947
BP	GO:0086103	G protein-coupled receptor signaling pathway involved in heart process	14	-0.730612	-2.06662	0.00016454	0.00244098	0.00181171	2404	tags=50%, list=10%, signal=45%	5997/1906/6714/857/5144/2771/1909
BP	GO:0030168	platelet activation	122	-0.377637	-1.762	0.000165036	0.00244371	0.00181373	6368	tags=46%, list=25%, signal=34%	5197/3717/7414/2149/10451/9002/8323/640/5023/7409/8527/5341/2207/5028/5912/3043/60/6814/2778/3315/23173/10630/3932/6403/375033/5154/4627/3611/1609/71/958/1511/4352/6812/150/4067/1465/959/83706/7301/6714/6850/5580/7450/114897/1281/84034/10398/1606/5270/5294/5156/10077/5777/5155/1192
BP	GO:0071346	cellular response to interferon-gamma	113	-0.394502	-1.81427	0.000171707	0.0025377	0.00188349	4662	tags=41%, list=19%, signal=33%	7474/7157/6361/6357/11140/7791/10097/6814/6369/7098/6367/3326/1613/6672/6376/6362/965/115361/3594/6347/71/6810/6812/2934/1906/7376/4641/7454/252983/115362/961/2634/199/10344/6352/3113/834/7431/338382/3965/6772/23580/6363/9341/23521/6366
BP	GO:0044743	protein transmembrane import into intracellular organelle	29	0.587765	2.09935	0.000172656	0.00254692	0.00189033	3685	tags=41%, list=15%, signal=35%	83752/3329/9131/5194/131118/80273/10469/5189/134266/5830/131474/100287932
MF	GO:0008391	arachidonic acid monooxygenase activity	20	0.658459	2.14084	0.000173817	0.00255484	0.00189622	6494	tags=80%, list=26%, signal=59%	57834/4051/1573/1557/1562/1543/284541/1579/1558/1572/1555/1571/1559/66002/199974/1553
BP	GO:0006490	oligosaccharide-lipid intermediate biosynthetic process	18	0.668516	2.12148	0.000174172	0.00255484	0.00189622	6864	tags=67%, list=27%, signal=49%	79053/85365/9526/57171/91869/29929/10195/440138/79796/79644/56052/79947
CC	GO:0005774	vacuolar membrane	381	-0.28267	-1.5204	0.000173923	0.00255484	0.00189622	5000	tags=30%, list=20%, signal=24%	83930/56262/23001/138050/3118/89849/51510/3117/4818/9032/51100/10970/56834/51311/114790/51382/2629/3125/11182/533/5025/3120/684/7098/5284/1917/1211/8546/3119/3326/20/4126/10053/55340/55062/1650/51606/2647/526/89845/23400/910/23503/5119/21/57132/1601/4758/4074/29082/54106/252839/8992/7405/1173/55737/56674/10670/55315/2782/4067/9528/3916/525/10312/8898/7805/8140/114990/1509/23457/84317/55283/302/79…
CC	GO:0097525	spliceosomal snRNP complex	49	-0.507804	-2.00349	0.000174902	0.00256076	0.00190061	4877	tags=57%, list=19%, signal=46%	26121/6627/9129/9128/84844/83443/24148/10713/6637/10946/9343/51634/51691/6636/6628/6638/23450/57819/6626/51690/27258/6629/10992/6633/153527/10421/8175/10465
BP	GO:0001503	ossification	369	-0.28367	-1.51487	0.00017528	0.00256151	0.00190116	4285	tags=27%, list=17%, signal=22%	5734/81792/9902/103/4318/79176/22856/3183/5747/2737/22800/10140/860/64131/5552/55790/4921/28964/1305/1462/11173/1836/3488/3199/2254/9260/653/3611/2194/115908/9770/255743/387/4435/9923/51232/657/3082/8313/2263/8321/525/10312/57045/9636/6209/864/2296/4146/5764/1290/7067/2274/652/10766/650/4920/8519/27316/1277/4330/1291/7042/596/2736/7171/182/25937/9365/57419/6696/10507/3399/2719/4208/1009/6169/3387…
BP	GO:0019886	antigen processing and presentation of exogenous peptide antigen via MHC class II	27	-0.584125	-2.00058	0.000177148	0.00258399	0.00191785	5985	tags=67%, list=24%, signal=51%	5641/3123/2207/3118/3117/3125/3120/3119/567/1509/3112/3113/3122/3109/3108/3115/972/3111
BP	GO:0006767	water-soluble vitamin metabolic process	55	0.47245	1.9685	0.000178494	0.00259146	0.00192339	5601	tags=47%, list=22%, signal=37%	2729/8876/441024/55312/4552/80704/6573/10588/55163/6470/113235/1719/29968/57026/4837/9963/9962/6472/166785/171425/3141/60496/5826/25974/686/11330
BP	GO:0001938	positive regulation of endothelial cell proliferation	86	-0.409039	-1.81084	0.000178034	0.00259146	0.00192339	5056	tags=41%, list=20%, signal=33%	2624/5365/3357/858/7474/10016/51548/9037/6369/7423/3676/6776/8862/51157/5228/3164/25865/79805/79031/26051/5293/652/650/6387/51738/10344/5335/1535/3148/7424/5155/5587/2152/8742/4192
MF	GO:0016616	oxidoreductase activity, acting on the CH-OH group of donors, NAD or NADP as acceptor	111	0.377357	1.79239	0.000178653	0.00259146	0.00192339	5992	tags=47%, list=24%, signal=36%	3295/2819/7358/11112/4191/6652/345275/126/3290/622/51181/3030/317749/6716/80270/10901/3033/3939/84869/8630/6697/26227/3028/284541/7881/130/3418/6718/128/51171/3293/51170/125/8608/3419/147015/27294/127/5959/157506/9563/124/3032/197257/2730/10202/1962/3156/51084/50814/157739/22977
MF	GO:0016746	acyltransferase activity	188	0.312429	1.60777	0.000181587	0.00262916	0.00195137	5031	tags=35%, list=20%, signal=28%	10/6296/51099/284098/38/2752/340562/3931/79575/84649/9588/51304/570/30/27349/39/137695/3030/6342/84869/10449/51114/84287/3158/1387/23464/55140/211/54995/54814/64172/54988/15/84243/123876/8648/157570/92292/64841/1629/116255/54677/79071/171425/1384/10249/8520/348158/1386/2679/7052/138474/4836/79844/8202/55304/8435/3032/55326/80168/1374/8050/55146/653082/6880
BP	GO:0045059	positive thymic T cell selection	14	-0.729299	-2.0629	0.000183897	0.00265768	0.00197254	2106	tags=57%, list=8%, signal=52%	9760/1794/3707/916/915/7535/972/917
BP	GO:0061437	renal system vasculature development	28	-0.604944	-2.09792	0.000186837	0.00268531	0.00199305	2100	tags=43%, list=8%, signal=39%	59/652/284/4854/5175/5156/1909/5155/6943/5159/80310/947
BP	GO:0061440	kidney vasculature development	28	-0.604944	-2.09792	0.000186837	0.00268531	0.00199305	2100	tags=43%, list=8%, signal=39%	59/652/284/4854/5175/5156/1909/5155/6943/5159/80310/947
BP	GO:0007411	axon guidance	222	-0.319144	-1.61443	0.000186713	0.00268531	0.00199305	4926	tags=31%, list=20%, signal=25%	5365/1749/10371/7474/4684/474/9037/9723/7869/56920/2596/23129/2044/285220/10500/5747/2737/2041/399/2048/91653/3800/7976/6586/3199/1123/5797/1400/90249/55558/3909/3918/1906/1436/23022/214/9355/284217/59352/23114/1949/2049/347733/4854/5879/23768/10505/6152/2736/6387/64919/152330/5361/2064/64218/2042/10507/4756/91624/1808/219699/682/1909/9353/5880/391/3908/2051
BP	GO:1990542	mitochondrial transmembrane transport	65	0.43924	1.90628	0.000189454	0.00270464	0.00200739	5584	tags=48%, list=22%, signal=37%	94081/3329/788/9131/22/79751/131118/10165/87178/80273/10469/9512/94097/291/3954/51312/7263/83733/118980/134266/131474/100287932/7350/7352/79714/10939/1374/57380/79085/84275/83884
BP	GO:0006638	neutral lipid metabolic process	111	0.376825	1.78987	0.000189563	0.00270464	0.00200739	3528	tags=32%, list=14%, signal=27%	1071/57406/8513/338/9663/255738/51099/2180/6400/5781/10677/6653/3990/9388/847/84649/116519/1373/718/350/10998/2822/4547/1607/13/8228/5105/139189/3949/150379/23175/9162/2166/116255/2710
BP	GO:0007163	establishment or maintenance of cell polarity	195	-0.329278	-1.63291	0.000188824	0.00270464	0.00200739	4856	tags=31%, list=19%, signal=25%	9124/5754/388585/7474/10092/2697/5314/54509/81704/60/10097/1741/2011/5747/399/64098/64130/143098/3326/29899/3071/4478/22841/84552/4627/3611/387/54820/3996/9793/2934/1794/1495/9355/284217/6993/10312/84446/389/6548/10487/4131/4926/55612/5879/10486/10252/83700/10403/2294/358/5880/10090/6363/10653/917/1236/391/6366/6425
BP	GO:0019439	aromatic compound catabolic process	395	0.265249	1.49549	0.000189278	0.00270464	0.00200739	7348	tags=41%, list=29%, signal=30%	6999/8942/5053/1763/23405/1776/79882/5167/8564/22849/6832/23034/9131/1432/23708/170506/64577/645/1806/38/5151/201626/3081/10924/60528/5860/5446/5444/23404/10605/1244/2954/26135/10588/87178/4913/5073/1807/29974/54888/22978/2926/253943/200424/30/125061/5169/10840/8148/7415/54915/1543/51071/27327/57026/10179/10492/23369/22868/3303/28234/340719/677/1618/8570/445329/124245/23049/9567/11163/2935/1572/5…
CC	GO:0032994	protein-lipid complex	37	0.530128	2.0329	0.000191075	0.00272126	0.00201973	7288	tags=68%, list=29%, signal=48%	1071/6291/338/4018/319/5444/3931/3990/1191/116519/350/3949/8504/8542/1622/335/51449/3069/6288/4481/336/3250/341/55937/6289
BP	GO:0006639	acylglycerol metabolic process	110	0.382365	1.8075	0.000193694	0.00275355	0.00204369	5040	tags=38%, list=20%, signal=31%	1071/57406/8513/338/9663/255738/51099/2180/6400/5781/10677/6653/3990/9388/847/84649/116519/1373/718/350/10998/2822/4547/1607/13/8228/5105/139189/3949/150379/23175/9162/2166/116255/2710/11057/335/55326/1571/80168/1374/5106
MF	GO:0046906	tetrapyrrole binding	132	0.355673	1.7364	0.00019594	0.00278043	0.00206365	6576	tags=43%, list=26%, signal=32%	6999/1595/57834/10424/1592/4051/3052/1544/124936/1573/57404/875/847/64816/1557/51302/1562/1589/1543/6391/1582/284541/1579/1576/1558/6392/1572/54205/23593/1591/1555/3273/1585/1528/259/1586/55640/1577/1581/4151/10857/340665/1571/1559/66002/10858/25974/51078/53905/54905/4846/80142/199974/1593/1553/3162/4842
BP	GO:0090175	regulation of establishment of planar polarity	55	-0.485233	-1.95738	0.000198014	0.00279972	0.00207797	6444	tags=62%, list=26%, signal=46%	166336/22943/25876/85407/6259/6422/9968/4919/8323/1951/1952/5754/128272/7474/7484/5314/8324/25/7976/115908/387/1601/9620/22881/51339/8321/1856/4920/5879/2535/2719/57216/2239/144165
BP	GO:0051209	release of sequestered calcium ion into cytosol	106	-0.389771	-1.78925	0.00019777	0.00279972	0.00207797	4750	tags=37%, list=19%, signal=30%	3357/845/25/387129/3596/6622/5031/22821/2281/6376/3932/287/6373/808/8996/126306/4067/930/255231/1193/55283/3270/581/6717/775/4283/3627/5335/1535/5144/7070/11151/3710/5777/5587/7220/6363/1236/6366
CC	GO:0032432	actin filament bundle	69	-0.449502	-1.91492	0.000201569	0.00284485	0.00211146	4076	tags=43%, list=16%, signal=37%	7791/5747/4026/27295/1265/9260/4627/3611/51474/59/171024/23022/4486/7205/29964/7168/4628/54751/64236/57175/10529/7171/29109/81/1535/10398/79778/1410/2275/4082
BP	GO:1903509	liposaccharide metabolic process	98	-0.400347	-1.8078	0.000202569	0.00285382	0.00211811	4528	tags=40%, list=18%, signal=33%	51097/8869/8707/3073/5408/2629/54344/128869/80235/7357/26301/7903/54872/20/79690/6484/8703/313/2717/65258/2760/8706/4758/285362/2524/53947/9514/5281/3074/9488/581/51228/5580/94005/5279/27090/3815/51604/8705
BP	GO:0006111	regulation of gluconeogenesis	38	0.530345	2.04427	0.000203155	0.00285693	0.00212043	6424	tags=53%, list=26%, signal=39%	57486/34/5164/2875/2203/84649/5465/10891/4837/1642/114899/2308/2641/5771/5903/84912/3952/1407/4485/27232
BP	GO:0071706	tumor necrosis factor superfamily cytokine production	155	-0.352006	-1.70314	0.000204481	0.00286018	0.00212283	4817	tags=40%, list=19%, signal=33%	114900/943/140885/51561/566/3459/3066/4940/5788/4057/7128/7474/5724/6833/384/1524/23586/101/7098/3315/8767/2048/6376/729230/4776/942/6504/2621/5914/54106/2841/245928/50856/3133/4939/64170/10125/29108/26191/10457/5443/7305/10392/284/6850/706/9466/54440/961/51738/54209/23643/1535/10417/23208/914/3965/5777/2950/6363/9181/947
BP	GO:1903555	regulation of tumor necrosis factor superfamily cytokine production	155	-0.352006	-1.70314	0.000204481	0.00286018	0.00212283	4817	tags=40%, list=19%, signal=33%	114900/943/140885/51561/566/3459/3066/4940/5788/4057/7128/7474/5724/6833/384/1524/23586/101/7098/3315/8767/2048/6376/729230/4776/942/6504/2621/5914/54106/2841/245928/50856/3133/4939/64170/10125/29108/26191/10457/5443/7305/10392/284/6850/706/9466/54440/961/51738/54209/23643/1535/10417/23208/914/3965/5777/2950/6363/9181/947
BP	GO:0015711	organic anion transport	331	0.276766	1.52682	0.000203753	0.00286018	0.00212283	5419	tags=35%, list=22%, signal=28%	10478/50640/94081/6505/18/54407/8564/255189/284439/23443/5562/552/23204/120103/5825/10246/51706/23428/948/375611/284111/6581/1244/79751/26279/8864/1814/6573/28231/10165/85320/113235/6582/23169/55244/1468/551/9429/4257/94097/54659/291/1066/7124/6514/10998/2917/114571/256987/4547/388323/6567/159963/6529/6554/5027/11255/1579/133482/28234/246213/10864/6520/6542/8402/9963/7442/83733/153129/118980/368/…
CC	GO:0030532	small nuclear ribonucleoprotein complex	58	-0.470538	-1.92583	0.000208009	0.00290433	0.00215561	4877	tags=45%, list=19%, signal=36%	83443/24148/10713/6637/50628/10946/9343/56257/51634/51691/6636/6628/6638/23450/57819/6626/51690/27258/6629/10569/10992/6633/153527/10421/8175/10465
BP	GO:0071526	semaphorin-plexin signaling pathway	42	-0.524671	-1.99903	0.000208766	0.00290973	0.00215961	5730	tags=52%, list=23%, signal=41%	23654/6405/54437/5365/10371/4684/9037/9723/396/7869/56920/23129/10500/55558/1906/5879/10505/5361/64218/10507/9464/1909
BP	GO:0060606	tube closure	85	-0.4195	-1.84799	0.000209405	0.00291345	0.00216238	6167	tags=48%, list=25%, signal=37%	317/2255/10959/6422/9968/23654/8323/5727/585/7040/7248/5898/5754/7474/25902/25/6201/55081/4524/7976/115908/9620/5914/8321/7289/9355/1856/5216/8463/652/26160/7042/2535/79977/8543/2348/6692/6768/57216/10653/144165
BP	GO:0030890	positive regulation of B cell proliferation	41	-0.516455	-1.95656	0.000215464	0.00299243	0.00222099	5379	tags=54%, list=21%, signal=42%	115352/5788/23529/59067/51293/3596/975/2048/952/3071/683/100/958/54106/84433/54440/596/57181/7293/4208/972/10673
BP	GO:0071280	cellular response to copper ion	24	0.606673	2.08642	0.000220771	0.00305231	0.00226544	2520	tags=50%, list=10%, signal=45%	4489/4499/4501/4493/4495/4496/351/4494/359/1543/4490/4502
BP	GO:0001843	neural tube closure	84	-0.417094	-1.83718	0.000220596	0.00305231	0.00226544	5948	tags=46%, list=24%, signal=36%	10959/6422/9968/23654/8323/5727/585/7040/7248/5898/5754/7474/25902/25/6201/55081/4524/7976/115908/9620/5914/8321/7289/9355/1856/5216/8463/652/26160/7042/2535/79977/8543/2348/6692/6768/57216/10653/144165
BP	GO:0006887	exocytosis	319	-0.288845	-1.52036	0.000220945	0.00305231	0.00226544	5570	tags=33%, list=22%, signal=26%	5729/640/5023/8027/5866/5872/8573/5341/5898/2624/57829/23396/116443/5028/9367/84062/90019/4818/5724/85477/2241/5865/3596/51150/11141/115827/7127/6814/1488/6622/64130/192683/8911/6688/5899/28964/3071/440279/22841/729230/10755/23400/51762/4627/3684/6810/3996/808/11031/867/9900/6812/150/4067/5058/8766/6616/80223/695/11314/3916/27040/117177/10125/6284/7462/7251/3689/6813/55503/11336/5293/5532/6850/10…
BP	GO:0071560	cellular response to transforming growth factor beta stimulus	227	-0.319997	-1.6216	0.000221822	0.00305903	0.00227042	6290	tags=39%, list=25%, signal=30%	4015/54778/9392/9141/4091/409/317/63976/6498/94/6422/2534/2280/3066/93649/7040/5598/94031/283149/51341/55198/25805/858/7474/27063/7157/25/859/9839/5654/1524/7791/8516/5747/3693/4093/161742/10637/10273/3326/6688/26524/124857/10755/5154/255743/4435/1601/79674/657/2263/1906/9404/8483/57178/3675/57045/80326/114990/6714/5300/650/2734/2022/1277/55612/7042/10252/857/1281/2348/1284/4208/11117/2615/65997/…
BP	GO:0009165	nucleotide biosynthetic process	194	0.316266	1.64492	0.000223213	0.0030728	0.00228065	5192	tags=35%, list=21%, signal=28%	8942/51703/51422/132/5631/441024/55312/221823/2180/8564/4522/5164/10135/38/79646/2981/2618/2639/1723/53354/10165/23475/5471/32/80347/5465/6470/125061/10891/203/65220/5198/7415/9626/4833/55022/4837/5313/107/8034/51727/142/79071/23498/523/51000/23305/79877/471/197322/130013/3251/4609/978/7084/50808/5162/2979/8050/23181/23417/50484/1738/5161/10861/272/5635
BP	GO:0018108	peptidyl-tyrosine phosphorylation	346	-0.290277	-1.53802	0.000224441	0.00307889	0.00228516	5752	tags=35%, list=23%, signal=28%	2534/4919/4908/7804/3645/2252/9655/5605/640/1464/4915/3066/55359/2322/7040/5753/5788/23529/59067/3976/388585/7157/7075/25/5912/2241/56034/3596/975/50507/1741/2044/285220/2209/5747/4739/653361/2041/6464/4254/8767/3678/64092/2048/1839/4921/9833/55872/3932/7039/3592/7272/5154/2621/1489/683/1609/10006/958/134/3082/8798/867/55024/2263/150/4067/10152/1436/695/4486/11314/7016/7301/1856/8764/9961/3589/72…
BP	GO:0050906	detection of stimulus involved in sensory perception	465	0.252295	1.45084	0.000224202	0.00307889	0.00228516	8274	tags=40%, list=33%, signal=27%	144125/563/391194/81285/150681/219958/219983/123041/390067/344892/346517/401992/81469/57053/119687/7124/138883/50840/403282/26683/132112/219957/219431/219493/161497/79501/51761/56656/403257/347169/84694/26529/440153/390075/390321/392309/283160/283092/138803/7442/8989/390037/8392/391112/81697/26219/442186/341416/441933/3249/390077/119682/138882/138802/441911/259289/390883/126541/119679/26648/28276…
BP	GO:2000027	regulation of animal organ morphogenesis	127	-0.371504	-1.75633	0.000226586	0.00310288	0.00230297	6508	tags=49%, list=26%, signal=36%	3227/166336/7849/22943/219736/4982/2255/7482/25876/85407/6259/55966/6422/9968/4919/8323/11331/2252/1951/6899/1952/5754/128272/7474/7484/5314/8324/25/859/860/7976/5154/115908/387/1601/9620/657/3082/22881/51339/1906/23213/8321/1856/140628/80326/652/650/4920/5879/2535/10252/4487/4070/2719/57216/147495/2239/6662/54361/947/144165
BP	GO:0060491	regulation of cell projection assembly	159	-0.351666	-1.69772	0.000227331	0.00310764	0.00230651	2643	tags=30%, list=11%, signal=27%	2241/10602/2596/10097/55920/3265/2048/57489/11344/139818/9696/9662/26052/10152/54849/7016/23433/117177/5216/6714/26051/51466/7454/10163/9742/54869/5580/5879/857/51196/83478/4070/10109/5420/26751/1809/51473/148170/3815/9353/23580/375790/5880/6363/55329/1236/391/6366
BP	GO:0032963	collagen metabolic process	81	-0.425846	-1.86233	0.000229348	0.00312976	0.00232292	1629	tags=44%, list=6%, signal=42%	5645/409/3688/8985/26276/2149/3066/7040/57333/4314/9902/4318/4319/79148/55323/4320/1471/652/9509/2022/1277/8751/1289/3673/4316/2191/11117/1278/7431/8510/54361/4239/871/5159/1513/114757
BP	GO:0051283	negative regulation of sequestering of calcium ion	107	-0.384583	-1.76827	0.000233914	0.00318652	0.00236505	4750	tags=36%, list=19%, signal=30%	3357/845/25/387129/3596/6622/5031/22821/2281/6376/3932/287/6373/808/8996/126306/4067/930/255231/1193/55283/3270/581/6717/775/4283/3627/5335/1535/5144/7070/11151/3710/5777/5587/7220/6363/1236/6366
MF	GO:0070279	vitamin B6 binding	43	0.508895	2.00978	0.000235453	0.00320192	0.00237648	4736	tags=49%, list=19%, signal=40%	8942/18/51166/2875/64902/875/55163/51540/6470/2806/1644/29968/23464/211/6472/189/51380/2731/55304/213/5836
BP	GO:0051051	negative regulation of transport	379	-0.282202	-1.51706	0.000236046	0.00320442	0.00237834	4957	tags=30%, list=20%, signal=25%	90342/51715/3976/55198/5028/4889/5728/51548/8724/845/6833/2697/859/387129/26297/7351/6536/4318/51686/11141/6814/2859/3638/2931/6622/11142/65268/7295/2048/192683/4828/20/6688/2281/6672/554/5999/29934/274/1409/3071/22925/392/344/3592/729230/2171/580/5021/1265/100/134/5997/54106/808/50852/10347/55737/3685/150/80223/1906/6236/11314/3958/9647/7376/79890/3589/2669/5569/8898/28954/8682/9270/1193/10550/6…
BP	GO:0071459	protein localization to chromosome, centromeric region	18	-0.676063	-2.04905	0.000238325	0.00321862	0.00238887	7126	tags=72%, list=28%, signal=52%	10664/3720/1058/5925/9212/55166/55920/81620/7272/9184/3550/9735/10403
BP	GO:0055088	lipid homeostasis	142	0.350834	1.73714	0.000237649	0.00321862	0.00238887	4585	tags=33%, list=18%, signal=27%	3172/2494/1071/23788/50640/4041/338/255738/6296/10802/51099/19/5562/6095/51/2646/3931/51128/79575/3990/9388/84649/57142/51302/116519/1066/51085/4547/1654/8228/123876/3949/9969/7555/150379/114899/7392/27329/8309/2695/23461/127385/51129/26154/1581/335/8435
BP	GO:0045055	regulated exocytosis	219	-0.319361	-1.6079	0.000238025	0.00321862	0.00238887	5217	tags=34%, list=21%, signal=27%	8573/5341/2624/57829/23396/116443/5028/84062/90019/4818/5724/85477/2241/3596/51150/6814/1488/6622/192683/8911/6688/28964/3071/440279/22841/729230/10755/4627/3684/6810/808/11031/867/9900/6812/150/4067/6616/80223/695/11314/3916/27040/10125/6284/7462/3689/6813/55503/5293/5532/6850/10257/6804/8673/9783/415117/5730/9145/306/23208/11151/135/2771/64780/5294/3965/2294/3815/57586/5880/3134/6844/9341
CC	GO:0001725	stress fiber	63	-0.458488	-1.90901	0.000239655	0.00322545	0.00239395	4076	tags=44%, list=16%, signal=37%	7791/5747/4026/27295/1265/9260/4627/3611/51474/59/171024/23022/4486/7205/29964/7168/4628/54751/64236/57175/10529/7171/29109/81/1535/10398/79778/2275
CC	GO:0097517	contractile actin filament bundle	63	-0.458488	-1.90901	0.000239655	0.00322545	0.00239395	4076	tags=44%, list=16%, signal=37%	7791/5747/4026/27295/1265/9260/4627/3611/51474/59/171024/23022/4486/7205/29964/7168/4628/54751/64236/57175/10529/7171/29109/81/1535/10398/79778/2275
BP	GO:0046686	response to cadmium ion	56	0.466001	1.95189	0.000240173	0.00322689	0.00239501	3375	tags=38%, list=13%, signal=33%	7779/2729/4489/4499/1147/1956/4501/4493/4495/4496/6647/6652/1544/4494/847/4490/383/4502/7015/5594/23498
BP	GO:0051960	regulation of nervous system development	393	-0.274305	-1.47959	0.000243792	0.0032699	0.00242693	5730	tags=34%, list=23%, signal=27%	23654/23462/7804/84079/6405/28514/54437/4915/347902/2670/3066/9856/7040/10494/57463/2895/23529/29882/158038/84631/2290/85458/65078/5365/3976/55198/3687/10371/388585/4803/3706/7474/474/5728/7157/6833/9037/23440/10419/9723/54674/1524/7869/56920/11141/869/10097/23129/259266/10500/2737/284403/2048/3213/7533/58494/567/5457/11344/57633/55695/140578/7976/51199/274/6376/644943/26022/4135/22954/4776/5021/…
BP	GO:0045806	negative regulation of endocytosis	49	-0.49915	-1.96934	0.000244634	0.00327559	0.00243116	3463	tags=39%, list=14%, signal=34%	192683/20/344/10347/3685/11314/3958/7376/79890/8898/302/88455/5879/150696/857/2042/23208/5587/84058
MF	GO:0051015	actin filament binding	196	-0.333701	-1.65536	0.000251153	0.00335713	0.00249168	5265	tags=38%, list=21%, signal=30%	246176/89/4703/7134/92241/3936/57471/10092/2318/114793/10552/25/85477/4629/822/10093/2314/10097/7739/11344/80206/274/55607/8826/23345/6709/91010/4627/51474/55201/28988/50853/4644/3927/1627/2934/79585/1495/120/9051/10095/65108/4641/63876/7168/4628/57175/10529/6876/55612/55930/64005/10083/84448/10094/118/199/7171/4622/1072/11078/653145/29109/81/10109/4642/7169/3059/79778/91624/11151/64780/84168/4082
BP	GO:0006664	glycolipid metabolic process	97	-0.394668	-1.78225	0.000253262	0.00337956	0.00250833	4528	tags=39%, list=18%, signal=32%	51097/8869/8707/3073/5408/2629/54344/128869/80235/7357/26301/7903/54872/20/79690/6484/8703/2717/65258/2760/8706/4758/285362/2524/53947/9514/5281/3074/9488/581/51228/5580/94005/5279/27090/3815/51604/8705
BP	GO:0001736	establishment of planar polarity	68	-0.446784	-1.89024	0.000254662	0.0033867	0.00251362	6627	tags=57%, list=26%, signal=42%	23322/166336/22943/25876/85407/6259/6422/9968/4919/8323/1951/1952/23245/5754/128272/7474/2295/7484/5314/8324/25/1741/7976/115908/387/1601/9620/22881/51339/8321/1856/84446/4920/5879/2535/2719/57216/2239/144165
BP	GO:0007164	establishment of tissue polarity	68	-0.446784	-1.89024	0.000254662	0.0033867	0.00251362	6627	tags=57%, list=26%, signal=42%	23322/166336/22943/25876/85407/6259/6422/9968/4919/8323/1951/1952/23245/5754/128272/7474/2295/7484/5314/8324/25/1741/7976/115908/387/1601/9620/22881/51339/8321/1856/84446/4920/5879/2535/2719/57216/2239/144165
MF	GO:0019842	vitamin binding	126	0.357029	1.73394	0.000259181	0.00344096	0.0025539	4736	tags=35%, list=19%, signal=28%	8942/18/51166/2875/64902/79646/5264/2638/6573/10588/875/55526/55163/10841/32/51540/24/6470/113235/2806/1381/1644/1719/795/29968/23464/211/26061/55753/2677/5095/5352/6472/5091/189/10994/51380/4967/2731/3141/127/55304/213/5836
BP	GO:0072507	divalent inorganic cation homeostasis	453	-0.269086	-1.4712	0.000260015	0.00344619	0.00255778	5348	tags=32%, list=21%, signal=25%	2280/805/624/146/9709/51024/5788/9187/2624/8811/2587/778/5028/8600/3357/2828/858/781/7474/845/5314/6357/25/116/859/387129/1524/5737/931/5734/3596/147138/10518/5025/2859/2905/6622/5031/54499/57620/8546/4828/643/23241/94107/2359/22821/2281/5739/952/6376/1907/2846/3932/287/729230/162514/6373/5021/7466/23400/10800/958/6863/57402/134/808/2841/8996/126306/3741/553/9900/3685/4067/1906/2769/525/10134/103…
MF	GO:0032395	MHC class II receptor activity	10	-0.776841	-1.97589	0.000261702	0.00345103	0.00256137	5623	tags=100%, list=22%, signal=78%	3118/3117/3125/3120/3119/3112/3113/3122/3111
BP	GO:0046637	regulation of alpha-beta T cell differentiation	65	-0.448591	-1.87997	0.00026108	0.00345103	0.00256137	4458	tags=38%, list=18%, signal=32%	7292/84695/3662/2737/8767/8546/3071/114548/942/3594/100/387/5914/3707/639/864/6850/54440/257101/3122/301/3965/4602/7535/6363
BP	GO:0031532	actin cytoskeleton reorganization	99	-0.394174	-1.77802	0.000261568	0.00345103	0.00256137	6569	tags=49%, list=26%, signal=37%	26499/2017/51225/55742/221981/2255/4908/3645/2252/5341/54828/5898/26037/84062/5754/9723/25/2241/396/5911/4739/10411/64098/6464/3265/2549/1613/23043/80115/4627/387/80731/221692/5058/2934/1436/10278/29085/9535/90952/85360/397/3059/79778/301/5156/3815/84168/4192
BP	GO:0038063	collagen-activated tyrosine kinase receptor signaling pathway	10	-0.775871	-1.97342	0.0002661	0.00350313	0.00260004	4036	tags=80%, list=16%, signal=67%	1287/4921/1285/780/1277/6850/1282/1284
MF	GO:0016903	oxidoreductase activity, acting on the aldehyde or oxo group of donors	44	0.496027	1.95527	0.000270426	0.0035541	0.00263787	6509	tags=61%, list=26%, signal=46%	7915/316/594/501/64577/4329/55526/54363/593/8659/217/10840/128/55753/4967/2330/26330/127/5162/8050/1738/223/5161/216/1109/1593/222
BP	GO:1903825	organic acid transmembrane transport	143	0.344079	1.70776	0.0002737	0.0035851	0.00266087	5126	tags=38%, list=20%, signal=30%	51703/117247/94081/55089/6505/54407/2180/788/23204/120103/5825/23428/948/284111/79751/8864/6573/10165/113235/6582/55244/1468/7124/10998/6567/159963/246213/6520/6542/8402/9963/83733/153129/118980/6506/9962/183/4036/124565/11136/8501/57709/4609/80131/366/6534/253512/208/6566/3766/8884/1374/5826/54716
BP	GO:0009615	response to virus	345	-0.286303	-1.51741	0.000273417	0.0035851	0.00266087	3837	tags=26%, list=15%, signal=22%	684/79102/7098/9582/90933/3315/6367/3764/3446/100507436/4277/6041/55601/27350/50489/80212/10346/5551/3460/9213/3592/22954/57337/114548/3594/81603/6036/81559/958/54541/54106/3588/2537/59/81030/9201/10155/4486/3445/4939/64170/1937/9636/10964/8678/29108/10561/26191/5450/6714/3429/10577/29800/581/8519/3925/117854/60489/64108/596/6387/8673/2962/4283/146857/11040/3600/3627/4600/6737/1072/6352/3669/9160…
CC	GO:0042641	actomyosin	69	-0.443013	-1.88728	0.000280165	0.00364901	0.00270831	4076	tags=43%, list=16%, signal=37%	7791/5747/4026/27295/1265/9260/4627/3611/51474/1627/59/171024/23022/4486/7205/29964/7168/4628/54751/64236/57175/10529/6804/7171/29109/81/1535/10398/79778/2275
BP	GO:0032635	interleukin-6 production	131	-0.368667	-1.7436	0.000280442	0.00364901	0.00270831	4719	tags=33%, list=19%, signal=27%	7128/7474/5724/7292/23586/51311/2629/7098/8767/6376/3071/6504/2621/54106/3082/55024/64170/3603/824/29108/26191/5450/7305/10392/10365/6850/9466/961/51738/199/54209/5603/1535/10417/51284/23208/3635/338382/3106/3965/5777/972/9181
BP	GO:0032675	regulation of interleukin-6 production	131	-0.368667	-1.7436	0.000280442	0.00364901	0.00270831	4719	tags=33%, list=19%, signal=27%	7128/7474/5724/7292/23586/51311/2629/7098/8767/6376/3071/6504/2621/54106/3082/55024/64170/3603/824/29108/26191/5450/7305/10392/10365/6850/9466/961/51738/199/54209/5603/1535/10417/51284/23208/3635/338382/3106/3965/5777/972/9181
BP	GO:0018212	peptidyl-tyrosine modification	349	-0.284374	-1.51012	0.000279246	0.00364901	0.00270831	5752	tags=35%, list=23%, signal=27%	2534/4919/4908/7804/3645/2252/9655/5605/640/1464/4915/3066/55359/2322/7040/5753/5788/23529/59067/3976/388585/7157/7075/25/5912/2241/56034/3596/975/50507/1741/2044/285220/2209/5747/4739/653361/2041/6464/4254/8767/3678/64092/2048/1839/4921/9833/55872/3932/7039/3592/7272/5154/2621/1489/683/1609/10006/958/134/3082/8798/867/55024/2263/150/4067/10152/1436/695/4486/11314/7016/7301/1856/8764/9961/3589/72…
BP	GO:0031294	lymphocyte costimulation	46	-0.504279	-1.96313	0.000286788	0.00372538	0.002765	2972	tags=41%, list=12%, signal=36%	3932/942/4067/959/8764/1949/6714/84433/916/857/29851/940/921/5777/100133941/6363/10673/1236/6366
BP	GO:0009111	vitamin catabolic process	15	0.688993	2.0463	0.000290786	0.00377107	0.0027989	5626	tags=73%, list=22%, signal=57%	57834/1592/4051/10588/1381/57026/1576/1591/340665/66002/54905
BP	GO:0120032	regulation of plasma membrane bounded cell projection assembly	157	-0.346891	-1.6801	0.000298816	0.0038688	0.00287144	2643	tags=30%, list=11%, signal=27%	2241/10602/2596/10097/55920/3265/2048/57489/11344/139818/9696/9662/26052/10152/54849/7016/23433/117177/5216/26051/51466/7454/10163/9742/54869/5580/5879/857/51196/83478/4070/10109/5420/26751/1809/51473/148170/3815/9353/23580/375790/5880/6363/55329/1236/391/6366
MF	GO:0016408	C-acyltransferase activity	17	0.684014	2.1199	0.000301161	0.00389272	0.0028892	4710	tags=76%, list=19%, signal=62%	6296/38/30/39/3030/6342/10449/23464/54988/123876/348158/55304/3032
BP	GO:0006686	sphingomyelin biosynthetic process	10	0.768487	2.00463	0.000305875	0.00394714	0.00292959	1427	tags=50%, list=6%, signal=47%	259230/9218/5007/166929/10351
BP	GO:0046942	carboxylic acid transport	263	0.283841	1.5251	0.000306451	0.00394808	0.00293028	4800	tags=32%, list=19%, signal=26%	50640/94081/6505/18/54407/8564/255189/5562/552/23204/120103/5825/10246/23428/948/375611/284111/6581/1244/79751/26279/8864/1814/6573/10165/85320/113235/6582/23169/55244/1468/551/9429/94097/54659/1066/7124/10998/2917/114571/256987/6567/159963/6529/6554/5027/11255/1579/28234/246213/6520/6542/8402/9963/7442/83733/153129/118980/368/6506/9962/81579/115111/183/50487/189/634/5172/1497/6579/10599/4036/387…
BP	GO:0035987	endodermal cell differentiation	44	-0.4967	-1.91904	0.000309856	0.00397885	0.00295312	4171	tags=41%, list=17%, signal=34%	4318/1295/64321/3693/8320/3678/3676/5460/3281/3909/3685/3689/1303/1290/1291/1289/1284/3912
BP	GO:1905039	carboxylic acid transmembrane transport	142	0.347612	1.72118	0.000309748	0.00397885	0.00295312	5126	tags=38%, list=20%, signal=30%	51703/117247/94081/55089/6505/54407/2180/788/23204/120103/5825/23428/948/284111/79751/8864/6573/10165/113235/6582/55244/1468/7124/10998/6567/159963/246213/6520/6542/8402/9963/83733/153129/118980/6506/9962/183/4036/124565/11136/8501/57709/4609/80131/366/6534/253512/208/6566/3766/8884/1374/5826/54716
BP	GO:0045071	negative regulation of viral genome replication	49	-0.493702	-1.94785	0.000310417	0.00397954	0.00295363	6899	tags=61%, list=27%, signal=45%	200315/3609/84875/4938/8638/57169/91543/56829/9683/4940/10318/4057/3428/4599/684/9582/6041/27350/10155/4939/9636/8519/117854/63901/60489/6352/3669/8815/164668/200316
CC	GO:0098857	membrane microdomain	305	-0.29877	-1.56714	0.000315409	0.00403692	0.00299622	3129	tags=24%, list=12%, signal=21%	10666/3751/10630/3932/287/5538/476/84790/3684/657/90249/51090/909/3741/5740/867/9495/7186/8871/4067/695/55824/1495/23213/23433/824/27040/7462/10287/4641/3689/930/7851/130574/6548/6714/1509/84433/302/285704/59272/284/6513/150696/857/30846/1910/4118/6281/54209/8717/3098/5420/5175/7070/925/3945/914/5595/3635/219699/973/6442/2771/682/7535/2026/962/871/100133941/83483/25999
CC	GO:0034358	plasma lipoprotein particle	34	0.546459	2.03984	0.00031823	0.00405976	0.00301317	7288	tags=68%, list=29%, signal=48%	1071/6291/338/4018/319/5444/3931/3990/1191/116519/350/3949/8542/335/51449/3069/6288/4481/336/3250/341/55937/6289
CC	GO:1990777	lipoprotein particle	34	0.546459	2.03984	0.00031823	0.00405976	0.00301317	7288	tags=68%, list=29%, signal=48%	1071/6291/338/4018/319/5444/3931/3990/1191/116519/350/3949/8542/335/51449/3069/6288/4481/336/3250/341/55937/6289
BP	GO:0002695	negative regulation of leukocyte activation	169	-0.343349	-1.67302	0.000325533	0.00414618	0.00307731	3553	tags=33%, list=14%, signal=28%	7128/3135/7292/2241/384/84695/3559/2737/100507436/64092/6688/8654/6376/6441/3071/729230/942/25807/1511/55024/4067/695/55824/11314/3958/7301/8764/57045/7805/864/26191/10457/652/7305/5585/79679/54900/2064/1493/8530/2615/23208/2896/3635/135/301/3965/2294/10077/5777/27242/374403/3134/972/4192
BP	GO:1901293	nucleoside phosphate biosynthetic process	196	0.314064	1.63482	0.000328878	0.00418198	0.00310388	5192	tags=34%, list=21%, signal=27%	8942/51703/51422/132/5631/441024/55312/221823/2180/8564/4522/5164/10135/38/79646/2981/2618/2639/1723/53354/10165/23475/5471/32/80347/5465/6470/125061/10891/203/65220/5198/7415/9626/4833/55022/4837/5313/107/8034/51727/142/79071/23498/523/51000/23305/79877/471/197322/130013/3251/4609/978/7084/50808/5162/2979/8050/23181/23417/50484/1738/5161/10861/272/5635
BP	GO:0001782	B cell homeostasis	28	-0.588482	-2.04083	0.000330376	0.00419159	0.00311102	4719	tags=50%, list=19%, signal=41%	7128/25/55619/139818/3071/100/4067/5585/581/596/819/4208/972/10673
BP	GO:0003207	cardiac chamber formation	14	-0.708595	-2.00434	0.000330704	0.00419159	0.00311102	1376	tags=50%, list=5%, signal=47%	650/6659/4208/6604/9464/1909/6909
MF	GO:0030170	pyridoxal phosphate binding	42	0.497586	1.9488	0.000333167	0.00420919	0.00312408	4736	tags=48%, list=19%, signal=39%	8942/18/51166/2875/64902/875/55163/6470/2806/1644/29968/23464/211/6472/189/51380/2731/55304/213/5836
BP	GO:0032273	positive regulation of protein polymerization	81	-0.41967	-1.83532	0.000333051	0.00420919	0.00312408	3137	tags=36%, list=12%, signal=31%	2241/859/10602/6369/80115/51199/274/28964/3071/387/9793/5058/5216/29108/403/4131/51466/89795/4926/5879/402/10344/10109/6188/148170/23580/8440/1236/6366
BP	GO:0000096	sulfur amino acid metabolic process	30	0.560939	2.02891	0.000334644	0.00422105	0.00313288	4963	tags=57%, list=20%, signal=46%	2729/55256/441024/4522/4552/4143/875/1373/4507/4357/7263/1036/189/51380/4482/23743/2730
BP	GO:0065002	intracellular protein transmembrane transport	44	0.492458	1.9412	0.000336135	0.00422624	0.00313673	4622	tags=41%, list=18%, signal=33%	83752/9697/6729/3329/9131/5194/131118/80273/10469/7095/5189/134266/55176/5830/131474/100287932/3309/208
BP	GO:0120034	positive regulation of plasma membrane bounded cell projection assembly	83	-0.40348	-1.77024	0.000336004	0.00422624	0.00313673	3265	tags=30%, list=13%, signal=26%	3265/11344/139818/9696/9662/26052/10152/54849/23433/5216/10163/54869/5879/51196/10109/1809/148170/3815/23580/375790/5880/6363/55329/1236/6366
MF	GO:0016645	oxidoreductase activity, acting on the CH-NH group of donors	25	0.591206	2.05552	0.000340676	0.00425601	0.00315883	2044	tags=52%, list=8%, signal=48%	29958/441024/4522/2110/645/5860/196743/58510/8659/1719/10157/10840/1757
BP	GO:0070372	regulation of ERK1 and ERK2 cascade	267	-0.293265	-1.50368	0.000340612	0.00425601	0.00315883	4826	tags=32%, list=19%, signal=26%	5028/10318/8600/4889/3357/5728/6361/10419/5314/6357/25/116/26281/387129/56034/50507/6369/6367/65268/6464/5031/3265/8767/161742/2048/7078/6376/6362/388121/5154/6504/2621/51231/7534/6347/255743/1601/10347/2263/4067/59/1436/64170/10125/25865/9965/29108/9270/2192/26191/78986/6714/5300/10457/652/650/10392/59272/284/6850/10252/2064/54209/10344/6352/5322/11117/5595/2771/3965/5156/846/9464/5777/5155/3744…
CC	GO:0005765	lysosomal membrane	344	-0.283817	-1.50257	0.00033989	0.00425601	0.00315883	4334	tags=28%, list=17%, signal=23%	10970/56834/51311/114790/51382/2629/3125/11182/533/5025/3120/684/7098/5284/1917/1211/8546/3119/3326/20/4126/10053/55340/1650/51606/2647/526/89845/23400/910/23503/5119/21/57132/1601/4758/4074/29082/54106/252839/8992/1173/55737/56674/10670/55315/2782/4067/9528/3916/10312/7805/8140/114990/1509/23457/55283/302/7942/23385/55858/57153/51296/529/8519/11010/5476/1291/8673/9516/1915/23207/9145/3136/80342/…
CC	GO:0098852	lytic vacuole membrane	344	-0.283817	-1.50257	0.00033989	0.00425601	0.00315883	4334	tags=28%, list=17%, signal=23%	10970/56834/51311/114790/51382/2629/3125/11182/533/5025/3120/684/7098/5284/1917/1211/8546/3119/3326/20/4126/10053/55340/1650/51606/2647/526/89845/23400/910/23503/5119/21/57132/1601/4758/4074/29082/54106/252839/8992/1173/55737/56674/10670/55315/2782/4067/9528/3916/10312/7805/8140/114990/1509/23457/55283/302/7942/23385/55858/57153/51296/529/8519/11010/5476/1291/8673/9516/1915/23207/9145/3136/80342/…
CC	GO:0043235	receptor complex	389	-0.273236	-1.47162	0.000344136	0.00429238	0.00318582	6198	tags=35%, list=25%, signal=27%	8029/7436/3688/4982/200959/56938/6259/960/3822/1380/94/3568/4919/23654/7804/3645/389400/151306/4915/9033/2843/10266/2550/2322/2895/56616/3563/5365/3687/116443/3357/51555/2569/4543/2675/7075/5354/3674/3821/3560/23129/3559/8807/8516/84171/1741/2044/285220/27429/2905/974/2041/4973/5284/3693/10203/3678/2048/3326/139760/567/4921/3676/3683/9049/5799/22925/3680/162514/5786/126129/3594/9568/3684/958/3655…
BP	GO:0043410	positive regulation of MAPK cascade	432	-0.268514	-1.4567	0.000354174	0.00441056	0.00327354	5677	tags=33%, list=23%, signal=26%	4908/389400/3123/11331/5605/151306/1464/4915/115352/60401/2322/6899/146/7040/10494/6278/5788/3654/10519/85458/220164/285613/3976/5028/8600/10371/4889/3357/858/7474/5728/10174/6361/6357/8324/25/116/8412/26281/387129/56034/84432/101/975/50507/6369/7098/653361/3276/6367/6464/5031/4254/3265/8767/8325/392255/6688/8654/23043/6376/5149/6362/7039/8826/388121/5154/6504/2621/57161/9770/6347/255743/958/134/…
CC	GO:0031252	cell leading edge	374	-0.278544	-1.49311	0.000357143	0.00444048	0.00329574	5361	tags=32%, list=21%, signal=25%	1021/2550/5872/10211/5341/54828/7248/5753/91663/10519/5141/23396/81930/3936/55198/405753/5783/10092/25/2241/23586/81704/822/60/10097/23129/8516/64419/4739/54434/10411/4254/4810/3678/64092/11344/130271/28964/10630/8826/526/5797/9260/4627/3611/10006/51474/387/6810/134/28988/90249/5152/10347/4644/9495/3685/1627/10152/59/5058/2934/26230/23022/1495/7016/9051/117177/4641/9459/9270/6548/6714/747/7168/46…
BP	GO:0009066	aspartate family amino acid metabolic process	42	0.495429	1.94035	0.000358217	0.00444677	0.00330041	6424	tags=60%, list=26%, signal=44%	55256/441024/4522/51166/443/4552/4143/10165/2806/10157/26227/4507/23464/468/5352/56954/4482/51268/60496/23743/1428/157739/445/54529/27232
MF	GO:0051861	glycolipid binding	28	-0.587069	-2.03593	0.000359104	0.00445072	0.00330335	5018	tags=61%, list=20%, signal=49%	6402/65078/1200/54749/911/128869/1800/6403/65258/5538/4067/284217/51228/3306/54209/7070/25999
BP	GO:0031341	regulation of cell killing	93	-0.40873	-1.82509	0.00036432	0.00450824	0.00334604	5949	tags=49%, list=24%, signal=38%	3822/51561/3123/966/7409/5788/59067/3135/598/1524/3596/3821/911/2208/100507436/3326/6688/567/5551/10666/3071/3592/910/3594/3684/3140/909/3133/3916/9437/10125/913/5532/7305/6850/3136/114836/3105/11035/6372/3122/4068/3106/3965/3134/3575
BP	GO:0006760	folic acid-containing compound metabolic process	26	0.592028	2.07896	0.000366769	0.00453139	0.00336322	1590	tags=54%, list=6%, signal=50%	2346/2643/441024/4522/8836/4552/2618/6573/10588/10841/6470/113235/1719/10840
BP	GO:0090022	regulation of neutrophil chemotaxis	28	-0.585965	-2.0321	0.00037552	0.0046322	0.00343803	3000	tags=43%, list=12%, signal=38%	3071/683/1906/5879/83700/9353/5880/972/6363/1236/4192/6366
BP	GO:0061448	connective tissue development	236	-0.307834	-1.56623	0.000381338	0.00469657	0.00348581	4777	tags=29%, list=19%, signal=24%	388585/2828/7474/51222/85477/81029/81792/2121/5396/5915/22856/54360/2737/860/57326/84159/114789/3213/392255/6688/55790/11173/2254/653/657/5914/85301/8313/59/1906/23213/3202/7298/864/4146/3221/7067/652/650/4920/2734/7076/1277/1289/1396/2202/4487/51738/64764/25979/1281/1019/4208/2487/633/5595/4209/6662/846/9464/5155/4256/871/5159/80310/2261/947/4192/1513
BP	GO:0001912	positive regulation of leukocyte mediated cytotoxicity	53	-0.459327	-1.83443	0.000387229	0.00476164	0.00353411	5949	tags=55%, list=24%, signal=42%	3822/51561/3123/7409/5788/59067/3135/911/6688/567/10666/3592/910/3594/3684/3140/909/3133/3916/10125/913/7305/3136/114836/3105/3122/4068/3106/3134
BP	GO:0001704	formation of primary germ layer	112	-0.37521	-1.72936	0.000387905	0.00476247	0.00353473	4662	tags=32%, list=19%, signal=26%	7474/2697/57057/8324/4318/8516/1295/64321/55614/3693/8320/3678/3676/5460/3281/657/2821/3909/3685/2263/3675/57045/3689/1303/2296/1290/652/1291/1289/3673/1284/3912/3691/23275/2294/51176
BP	GO:0009071	serine family amino acid catabolic process	12	0.734158	2.04082	0.000392352	0.00480954	0.00356966	3734	tags=75%, list=15%, signal=64%	875/51540/6470/275/1036/6472/189/51380/2731
BP	GO:0014912	negative regulation of smooth muscle cell migration	22	-0.607909	-1.99407	0.000395512	0.00484069	0.00359278	2788	tags=45%, list=11%, signal=40%	3488/387/657/2768/3486/7168/57175/199/4208/9353
BP	GO:0001910	regulation of leukocyte mediated cytotoxicity	79	-0.415277	-1.81887	0.000396173	0.00484122	0.00359317	4312	tags=49%, list=17%, signal=41%	3822/51561/3123/7409/5788/59067/3135/1524/3821/911/100507436/6688/567/10666/3071/3592/910/3594/3684/3140/909/3133/3916/9437/10125/913/5532/7305/3136/114836/3105/11035/6372/3122/4068/3106/3965/3134/3575
BP	GO:0048525	negative regulation of viral process	82	-0.404315	-1.77547	0.00040202	0.00490502	0.00364052	6899	tags=51%, list=27%, signal=37%	200315/3609/84875/4261/4938/8638/57169/91543/56829/9683/11074/4940/2219/7342/10318/4057/8724/3428/4599/684/9582/6041/27350/22954/81603/81559/2934/10155/4939/9636/8519/117854/63901/60489/6737/6352/3669/8815/9023/164668/6772/200316
BP	GO:0002444	myeloid leukocyte mediated immunity	94	-0.394843	-1.76451	0.000406274	0.00494921	0.00367333	4567	tags=41%, list=18%, signal=34%	5724/2241/1524/23586/3596/6814/2209/6688/729230/3684/6810/1511/867/3133/6812/4067/695/11314/64170/27040/10125/6284/7462/3689/6813/5293/7305/6850/8673/5730/306/6372/10417/5294/3965/2294/3815/5880/6844
BP	GO:0071276	cellular response to cadmium ion	35	0.548384	2.06665	0.000411076	0.00499219	0.00370522	3122	tags=40%, list=12%, signal=35%	4489/4499/1147/1956/4501/4493/4495/4496/6647/1544/4494/4490/4502/5594
MF	GO:0051287	NAD binding	49	0.477865	1.94356	0.000411038	0.00499219	0.00370522	5580	tags=47%, list=22%, signal=37%	23530/2819/316/7358/11112/4720/5860/6652/2746/3030/11162/217/3033/26227/3418/142/3419/26330/127/1962/23408/216/51084
BP	GO:0050855	regulation of B cell receptor signaling pathway	17	-0.666737	-1.99238	0.000412448	0.00500109	0.00371183	2111	tags=76%, list=8%, signal=70%	640/115352/975/4067/11314/9404/930/26191/5583/2874/57181/23228/123920
BP	GO:1901990	regulation of mitotic cell cycle phase transition	259	-0.30457	-1.56156	0.000416991	0.00504836	0.00374691	6527	tags=39%, list=26%, signal=29%	1022/135458/51514/54443/10385/835/1843/219736/23236/22933/6240/4762/2255/9525/11170/4582/7480/63967/5925/11331/85417/286053/699/7508/6241/1062/9212/1063/55198/55159/5728/7157/55835/9032/6790/328/65123/57504/51065/55920/84861/51379/56984/11200/81620/56257/7517/10197/7756/11065/7272/11130/3364/9319/6347/2071/5721/10263/29933/3741/10106/51339/9510/8766/8556/55743/29945/84446/5569/9184/25949/3550/104…
BP	GO:0050862	positive regulation of T cell receptor signaling pathway	13	-0.72119	-2.00091	0.00042179	0.0050829	0.00377255	4107	tags=69%, list=16%, signal=58%	975/10666/3932/100/50852/25865/84433/6188/1236
BP	GO:0048535	lymph node development	17	-0.665098	-1.98748	0.000420996	0.0050829	0.00377255	3417	tags=65%, list=14%, signal=56%	159296/7040/643/10630/9760/4049/3600/11035/4050/57124/3575
CC	GO:0031983	vesicle lumen	305	-0.296004	-1.55264	0.000421444	0.0050829	0.00377255	4314	tags=30%, list=17%, signal=26%	1727/114790/5049/5708/10097/10450/6727/1476/29099/1512/3310/7423/78991/3326/6286/7078/3728/5552/567/1621/10493/2171/3934/2717/6709/1265/2760/5154/1460/2621/6036/100/84514/4758/28988/353/3082/1521/81567/1511/2821/10394/175/2934/1794/8635/83706/226/2919/6993/1075/9961/2162/5036/29108/4069/3074/7114/10487/1509/10577/6282/302/9535/5443/79169/7076/5476/5580/58485/7450/3608/64333/4125/7042/5768/83716/1…
BP	GO:0036336	dendritic cell migration	29	-0.577464	-2.0201	0.000424041	0.00510217	0.00378685	3357	tags=48%, list=13%, signal=42%	6688/3592/729230/6504/2621/56833/1235/6352/7852/5294/3965/6363/1236/6366
BP	GO:0006570	tyrosine metabolic process	15	0.676518	2.00925	0.00043263	0.00519469	0.00385552	3208	tags=60%, list=13%, signal=52%	5053/143941/84105/389434/3081/2954/5092/1638/2184
BP	GO:1903556	negative regulation of tumor necrosis factor superfamily cytokine production	56	-0.4691	-1.90326	0.000433056	0.00519469	0.00385552	3097	tags=34%, list=12%, signal=30%	6376/6504/2621/5914/2841/245928/50856/26191/10457/5443/706/9466/51738/54209/23208/3965/5777/2950/947
BP	GO:0031343	positive regulation of cell killing	60	-0.455239	-1.8677	0.000436212	0.00521656	0.00387175	5949	tags=53%, list=24%, signal=41%	3822/51561/3123/7409/5788/59067/3135/911/2208/6688/567/5551/10666/3592/910/3594/3684/3140/909/3133/3916/10125/913/7305/6850/3136/114836/3105/3122/4068/3106/3134
BP	GO:0001952	regulation of cell-matrix adhesion	110	-0.382308	-1.75872	0.000436084	0.00521656	0.00387175	5880	tags=46%, list=23%, signal=36%	55966/94/6422/11170/4680/1012/1021/8573/54828/7248/10519/59339/5728/9723/5314/25/5747/55920/2041/3728/1613/6376/5786/683/71/387/9647/54453/5328/9270/6548/6714/347/916/780/8751/55612/5879/596/6281/182/1307/56477/2042/1029/7070/54361/30008/6237/1236/6366
CC	GO:0034364	high-density lipoprotein particle	27	0.554969	1.97281	0.000444471	0.00529915	0.00393305	7288	tags=70%, list=29%, signal=50%	1071/6291/338/319/5444/3931/3990/1191/116519/350/8542/335/3069/6288/336/3250/341/55937/6289
CC	GO:0032040	small-subunit processome	27	0.5539	1.96901	0.000444471	0.00529915	0.00393305	4638	tags=52%, list=18%, signal=42%	55272/10885/10199/65083/57050/79954/134430/92856/10607/5591/25983/11103/55813/51096
BP	GO:0010712	regulation of collagen metabolic process	31	-0.559638	-1.96913	0.000446145	0.00531103	0.00394187	1629	tags=39%, list=6%, signal=36%	55323/1471/652/2022/3673/2191/11117/7431/54361/4239/5159/114757
BP	GO:0051282	regulation of sequestering of calcium ion	108	-0.380173	-1.74444	0.000449122	0.00533835	0.00396214	4750	tags=36%, list=19%, signal=29%	3357/845/25/387129/3596/6622/5031/22821/2281/6376/3932/287/6373/808/8996/126306/4067/930/255231/1193/55283/3270/581/6717/775/4283/3627/5335/1535/5144/7070/11151/3710/5777/5587/7220/6363/1236/6366
BP	GO:0001973	G protein-coupled adenosine receptor signaling pathway	12	-0.742599	-1.99595	0.000452637	0.00536386	0.00398108	2531	tags=50%, list=10%, signal=45%	5028/100/134/111/135/2771
BP	GO:0035588	G protein-coupled purinergic receptor signaling pathway	12	-0.742599	-1.99595	0.000452637	0.00536386	0.00398108	2531	tags=50%, list=10%, signal=45%	5028/100/134/111/135/2771
BP	GO:0055090	acylglycerol homeostasis	35	0.546462	2.05941	0.000455384	0.00538012	0.00399315	4962	tags=49%, list=20%, signal=39%	3172/1071/50640/6095/2646/3990/84649/116519/51085/123876/9969/114899/27329/2695/51129/335/64240
BP	GO:0070328	triglyceride homeostasis	35	0.546462	2.05941	0.000455384	0.00538012	0.00399315	4962	tags=49%, list=20%, signal=39%	3172/1071/50640/6095/2646/3990/84649/116519/51085/123876/9969/114899/27329/2695/51129/335/64240
BP	GO:0060401	cytosolic calcium ion transport	159	-0.343356	-1.65761	0.000456906	0.00538998	0.00400046	5752	tags=38%, list=23%, signal=29%	2534/6261/9002/5026/5023/2280/805/5788/9187/778/3357/781/845/25/387129/931/3596/5025/2905/6622/5031/22821/2281/6376/3932/287/162514/6373/808/8996/126306/4067/930/255231/1193/55503/55283/3270/581/6717/775/596/857/489/4283/3627/5335/1535/5144/7070/51393/11151/3710/5777/5587/7220/6363/784/1236/6366
BP	GO:0072010	glomerular epithelium development	26	-0.585535	-1.98999	0.000459525	0.00541272	0.00401734	1642	tags=42%, list=7%, signal=40%	8826/2296/652/1910/182/5420/5175/1909/100133941/947/8842
BP	GO:0006099	tricarboxylic acid cycle	30	0.556028	2.01115	0.000460449	0.00541546	0.00401937	5122	tags=57%, list=20%, signal=45%	23530/2271/4191/55526/6390/92259/6391/3418/55753/6392/8803/6389/3419/4967/8801/5162/5161
BP	GO:0043588	skin development	275	-0.2903	-1.49754	0.000462709	0.00543388	0.00403305	2128	tags=17%, list=8%, signal=15%	2263/23022/9355/3675/7251/8796/427/2296/3065/80326/1290/5583/9509/3925/1277/144501/4926/55612/7042/1289/596/2736/64919/79977/168002/182/8717/54345/3673/1281/6768/1009/4050/3691/94234/1278/147495/3855/80144/301/3892/6662/27152/55504/2118/58495
BP	GO:0048844	artery morphogenesis	68	-0.436343	-1.84606	0.000470893	0.00552171	0.00409823	2426	tags=29%, list=10%, signal=27%	657/1906/57178/639/2296/652/2022/4854/7042/6659/182/1281/2348/2294/9464/1909/6909/30008/5159/4192
BP	GO:0030433	ubiquitin-dependent ERAD pathway	72	0.417808	1.84621	0.00047196	0.00552595	0.00410138	5920	tags=40%, list=24%, signal=31%	51439/9354/6400/29979/80267/11160/10613/9097/57003/4121/7415/6048/55432/4189/54788/11124/7844/115290/91445/267/9695/201595/3309/79982/84447/10869/7327/7706/80020
BP	GO:2000181	negative regulation of blood vessel morphogenesis	86	-0.394965	-1.74853	0.00047284	0.00552799	0.0041029	4737	tags=37%, list=19%, signal=30%	11005/2828/3135/6833/7075/9723/22905/161742/729230/3339/5797/22846/9510/23213/3202/2296/1285/7058/10365/7042/51738/55810/6558/3627/64218/1284/1870/11117/6772/54361/1634/6678
BP	GO:0071356	cellular response to tumor necrosis factor	198	-0.32397	-1.60481	0.000474068	0.00553409	0.00410742	3097	tags=26%, list=12%, signal=23%	6376/6362/22954/11173/965/3611/2621/6347/255743/958/149951/8996/7188/8877/10670/7186/1906/8764/7805/29108/427/8784/7114/608/10365/2874/1277/6850/2167/2634/7293/8717/10344/10068/81/6352/1535/6188/834/5595/6772/8718/55504/27242/2950/6363/9181/83483/10673/6366/83643
BP	GO:0072503	cellular divalent inorganic cation homeostasis	434	-0.265366	-1.44227	0.000475156	0.00553854	0.00411073	5348	tags=31%, list=21%, signal=25%	2280/805/624/146/9709/51024/5788/9187/2624/8811/2587/778/5028/3357/2828/858/781/7474/845/5314/6357/25/116/859/387129/1524/5737/931/5734/3596/10518/5025/2859/2905/6622/5031/54499/57620/8546/4828/643/23241/94107/2359/22821/2281/5739/952/6376/1907/2846/3932/287/729230/162514/6373/5021/7466/23400/10800/958/6863/134/808/2841/8996/126306/3741/553/9900/3685/4067/1906/2769/10134/10312/121665/930/255231/5…
MF	GO:0042605	peptide antigen binding	25	-0.588076	-1.98538	0.000478155	0.00556522	0.00413053	4673	tags=64%, list=19%, signal=52%	3135/3117/3125/6891/3119/3133/8140/6892/6890/3136/3105/3113/3122/3115/3106/3134
BP	GO:0007178	transmembrane receptor protein serine/threonine kinase signaling pathway	331	-0.281592	-1.48496	0.000481849	0.00559988	0.00415625	4966	tags=29%, list=20%, signal=24%	94031/283149/147409/23090/51341/1749/55198/388585/25805/858/7474/7157/57057/25/859/9839/5654/7791/79176/8516/5747/10140/860/3693/4093/25970/161742/10637/10273/3326/392255/6688/26524/124857/10755/2254/7272/653/1460/3611/255743/4435/10923/1601/51232/79674/657/23213/8321/9404/55273/8483/57178/3675/57045/114990/9688/6714/285704/5300/652/650/4920/2734/2022/4926/55612/7042/10252/857/4487/168002/25937/1…
BP	GO:0043405	regulation of MAP kinase activity	172	-0.332195	-1.62162	0.000487404	0.00565605	0.00419794	5278	tags=33%, list=21%, signal=26%	2322/7040/5788/3654/84062/8600/3357/7474/859/56034/101/2629/50507/4254/3265/8325/8654/7039/5154/958/5997/54106/245928/150/7186/4067/5058/1906/4486/11314/1856/10125/7251/23636/26191/7345/6714/652/650/4920/6850/54900/5580/10252/857/2064/28951/6188/5294/3815/5777/5155/5159/100133941/2950/80310/6363
BP	GO:0031346	positive regulation of cell projection organization	295	-0.294303	-1.53593	0.000489509	0.00567208	0.00420984	6262	tags=37%, list=25%, signal=28%	10435/23373/7436/9139/8428/2664/153090/79734/4076/6498/5274/2534/4919/23654/7804/84079/4915/585/10494/54828/57463/5898/5753/29882/85458/5365/5754/91752/4803/3706/7474/8724/55835/9037/25/10602/11141/10097/23129/2011/3265/2048/2281/11344/139818/140578/51199/6376/4135/10300/653/51762/9696/9662/158866/26052/3655/5997/28988/3082/9896/55558/4067/1627/9760/10152/8766/26230/54849/8321/23433/1856/3675/521…
BP	GO:0043368	positive T cell selection	33	-0.5389	-1.91959	0.000493251	0.0056764	0.00421305	5149	tags=52%, list=20%, signal=41%	5788/10538/84695/3662/3594/4063/9760/1794/3707/916/596/64919/114836/915/7535/972/917
BP	GO:0010718	positive regulation of epithelial to mesenchymal transition	45	-0.494713	-1.90818	0.000493473	0.0056764	0.00421305	5330	tags=44%, list=21%, signal=35%	3066/7040/283149/25805/57057/10630/1601/8313/2296/652/650/2022/1277/7042/182/25937/10439/51176/4192/7041
BP	GO:0015850	organic hydroxy compound transport	226	0.298684	1.58144	0.000493506	0.0056764	0.00421305	6008	tags=41%, list=24%, signal=31%	1071/114885/9218/338/255738/10802/6857/18/5007/19/5781/5562/5825/948/114880/364/6581/3931/1244/1814/3990/6770/1394/9388/6532/85320/24/6582/1191/116519/10351/6342/359/219931/1066/91683/10998/341359/1582/6580/4547/114134/159963/6554/11255/2693/28234/3949/5045/1137/4040/6526/114883/6570/6571/51083/54762/185/183/634/114882/6579/10599/4129/23461/1581/4609/4035/282679/366/335/11315/8435/6566/64240/1344…
BP	GO:0044772	mitotic cell cycle phase transition	363	-0.27769	-1.48062	0.000491293	0.0056764	0.00421305	6567	tags=37%, list=26%, signal=28%	1785/1022/135458/51514/54443/9088/10385/835/1843/219736/23236/22933/3688/6240/4762/2255/9525/4863/899/11170/4582/7480/63967/5925/11331/85417/1163/286053/699/7508/219771/1021/805/6241/1062/9212/1063/51400/51547/54850/55198/2029/55159/5728/7157/55835/9032/6790/328/65123/2305/5243/79176/57504/51065/55920/84861/51379/6881/56984/11200/81620/10309/890/901/56257/9833/26524/7517/10197/7756/11065/7272/111…
BP	GO:0044270	cellular nitrogen compound catabolic process	382	0.260029	1.46079	0.000493238	0.0056764	0.00421305	6069	tags=34%, list=24%, signal=26%	6999/8942/29958/1763/23405/1776/79882/5167/8564/22849/6832/23034/9131/1432/23708/170506/645/1806/38/5151/201626/10924/60528/4329/23404/10605/1244/26135/10588/87178/23475/4913/5073/1807/29974/54888/22978/2926/253943/200424/125061/5169/10840/8148/7415/54915/51071/27327/57026/10179/10492/23369/22868/33/3303/4357/28234/340719/677/1618/8570/1576/124245/23049/9567/7263/11163/2935/55270/10128/4817/1773/…
BP	GO:0043038	amino acid activation	25	0.581305	2.0211	0.000497532	0.00571432	0.0042412	5471	tags=56%, list=22%, signal=44%	57176/124454/79731/132949/55157/57505/55699/2193/283459/80222/10056/92935/80755/23395
BP	GO:0015936	coenzyme A metabolic process	17	0.672184	2.08323	0.000498766	0.00571476	0.00424152	5864	tags=59%, list=23%, signal=45%	64087/38/79646/53354/80347/8034/54677/79877/3156/390916
BP	GO:1902904	negative regulation of supramolecular fiber organization	135	-0.347325	-1.65492	0.00049903	0.00571476	0.00424152	4392	tags=33%, list=17%, signal=28%	85477/859/822/2314/54434/79822/6622/11344/80206/130271/5203/6709/10300/4133/51474/50853/2934/120/5216/7114/9535/57175/4131/3925/7454/89795/23370/10163/5580/118/4070/54209/11078/23075/11117/1410/11151/5201/9353/5204/9168/9181/11075/54961/25999
BP	GO:0010524	positive regulation of calcium ion transport into cytosol	49	-0.482988	-1.90558	0.000499948	0.00571692	0.00424312	6736	tags=51%, list=27%, signal=37%	5319/57158/2149/9002/5026/5023/805/25/387129/3596/5025/6622/5031/6376/6373/808/930/581/6717/857/4283/3627/5335/7070/7220
BP	GO:0045766	positive regulation of angiogenesis	145	-0.349565	-1.67744	0.00050393	0.00574568	0.00426447	4662	tags=34%, list=19%, signal=28%	7474/10016/51548/1545/7075/9037/25/1524/6369/7098/2041/10411/3315/1512/2549/7423/3678/3728/10800/958/3082/5228/6019/5740/8877/147372/694/2113/25865/79805/79031/5293/2022/51738/64094/306/5335/84034/2896/126393/7852/7424/358/5587/2152/8742/947/6237/4192
BP	GO:1904018	positive regulation of vasculature development	145	-0.349565	-1.67744	0.00050393	0.00574568	0.00426447	4662	tags=34%, list=19%, signal=28%	7474/10016/51548/1545/7075/9037/25/1524/6369/7098/2041/10411/3315/1512/2549/7423/3678/3728/10800/958/3082/5228/6019/5740/8877/147372/694/2113/25865/79805/79031/5293/2022/51738/64094/306/5335/84034/2896/126393/7852/7424/358/5587/2152/8742/947/6237/4192
CC	GO:0030027	lamellipodium	187	-0.323819	-1.60053	0.000512079	0.00583011	0.00432713	4241	tags=31%, list=17%, signal=26%	81704/822/60/10097/23129/4739/54434/10411/4254/4810/11344/130271/28964/10630/5797/3611/10006/387/6810/28988/3685/1627/10152/59/5058/2934/26230/23022/1495/7016/9051/117177/9459/9270/6548/4628/57175/51466/10163/2245/5879/64005/10094/51196/199/1072/5335/10109/23075/5420/2191/1809/11151/54997/89846/84168/5880/11075
MF	GO:0003724	RNA helicase activity	68	0.417287	1.8376	0.000517657	0.00587653	0.00436159	6721	tags=47%, list=27%, signal=35%	10146/6832/64794/170506/83990/56919/54505/51202/9188/57647/11269/60625/3508/55308/1654/79039/25788/11056/1656/6499/54606/64848/1662/57696/9704/1659/1660/55794/168400/1665/5976/54555
BP	GO:0007565	female pregnancy	172	-0.33118	-1.61666	0.000517168	0.00587653	0.00436159	2788	tags=30%, list=11%, signal=27%	5069/7319/3976/8434/6833/2697/116/7351/150921/4318/5066/340784/3678/952/3488/5021/5997/5914/5228/6019/150/10155/81539/824/3675/5368/639/2192/5764/8614/59272/7076/5125/780/53405/6513/596/7026/51738/2182/1307/3673/6696/7216/85360/397/3691/3490/682/3965/54361/23641
BP	GO:0030100	regulation of endocytosis	195	-0.314379	-1.55902	0.000526893	0.00597273	0.00443298	3541	tags=27%, list=14%, signal=23%	80230/192683/20/567/29934/274/9784/3071/11037/344/5869/5538/8862/1609/1601/808/11031/10347/1173/8877/867/3685/11314/3958/7376/79890/79872/8898/7251/60682/6714/302/5532/977/88455/284/6850/5879/150696/857/54209/3673/84251/2042/2719/23208/5587/84058/6363/967/6366/25999
BP	GO:0070231	T cell apoptotic process	48	-0.488627	-1.91409	0.000535914	0.00606621	0.00450237	4662	tags=46%, list=19%, signal=37%	7474/7157/57864/384/81704/101/3559/2737/5133/1178/100/3958/10945/652/581/1831/6352/11035/939/6194/3965/3575
BP	GO:0032543	mitochondrial translation	58	0.446353	1.88248	0.000541112	0.00611621	0.00453947	8212	tags=59%, list=33%, signal=40%	85476/26995/124454/54516/55157/51021/84340/10102/57129/57505/4528/55699/22868/10128/283459/6472/64960/92170/80222/79072/28957/64968/23395/51081/6150/63931/51069/51116/65993/7284/54938/8846/84881/64951
BP	GO:0002551	mast cell chemotaxis	10	-0.755909	-1.92265	0.000543668	0.00613624	0.00455434	3543	tags=80%, list=14%, signal=69%	7423/5228/79890/5293/23075/3815/7424/5880
BP	GO:0034637	cellular carbohydrate biosynthetic process	71	0.416858	1.83966	0.00055464	0.00625107	0.00463957	5526	tags=41%, list=22%, signal=32%	178/5167/34/2683/2998/2203/3612/8864/8789/3479/53632/378884/9653/79660/5105/10580/7360/9348/2632/374907/3038/3481/208/10728/93010/5106/5509/2131/3613
MF	GO:0120227	acyl-CoA binding	23	0.609285	2.07486	0.000561643	0.00628478	0.00466459	5610	tags=57%, list=22%, signal=44%	79646/4329/91452/2639/53354/3030/6342/33/37/1622/8435/134526/64746
BP	GO:0071677	positive regulation of mononuclear cell migration	64	-0.430603	-1.80237	0.000560974	0.00628478	0.00466459	4312	tags=42%, list=17%, signal=35%	7474/1524/81704/101/6688/58494/3676/3592/729230/6504/2621/387/57402/3958/8764/29108/961/1235/6387/199/3627/6352/3965/27347/80310/1236/6366
BP	GO:0006643	membrane lipid metabolic process	173	-0.330247	-1.61331	0.000559079	0.00628478	0.00466459	4751	tags=34%, list=19%, signal=28%	7054/6610/64834/51097/1545/8869/8707/3073/5408/79993/2629/54344/128869/80235/27429/7357/26301/7903/54872/20/79690/6484/8703/2717/65258/5538/2760/347735/8706/4758/6785/8877/285362/2524/53947/9514/8439/25865/427/5281/3074/1455/27293/9488/581/51228/2525/5580/94005/5168/5279/130367/221/27090/5518/3815/5587/51604/8705
MF	GO:0022853	active ion transmembrane transporter activity	237	0.2923	1.54907	0.000561249	0.00628478	0.00466459	3841	tags=29%, list=15%, signal=25%	10060/6505/23516/79572/54407/389015/57130/10246/1327/375611/284111/1244/487/79751/2542/490/6573/28231/540/6532/123041/85320/113235/57468/4891/291/9153/114571/6580/114134/159963/6529/6554/344905/3954/133482/28234/9376/10864/6520/8402/84561/9963/488/23315/83733/368/6506/6575/9962/113655/6526/6570/6574/51151/6571/9197/115111/491/523/6521/6543/5172/1497/6579/6527/57282/1528/10599
BP	GO:0070371	ERK1 and ERK2 cascade	289	-0.289161	-1.50434	0.00055936	0.00628478	0.00466459	4826	tags=32%, list=19%, signal=26%	5028/10318/8600/4889/3357/5728/6361/8820/10419/5314/6357/25/116/26281/387129/56034/5734/50507/6369/6367/65268/1512/6464/5031/3265/8767/161742/2048/7078/6376/6362/388121/5021/5154/6504/2621/51231/7534/6347/255743/1601/10347/3685/2263/4067/59/1906/1436/64170/10125/25865/9965/29108/9270/2192/26191/78986/6714/5300/10457/652/650/10392/59272/284/6850/10252/2064/54209/10344/6352/5322/11117/5595/2771/396…
BP	GO:0051281	positive regulation of release of sequestered calcium ion into cytosol	35	-0.546265	-1.98227	0.000577565	0.00644454	0.00478316	6425	tags=57%, list=26%, signal=43%	57158/2149/9002/805/25/387129/3596/6622/5031/6376/6373/808/930/581/6717/4283/3627/5335/7070/7220
BP	GO:0046633	alpha-beta T cell proliferation	35	-0.546088	-1.98163	0.000577565	0.00644454	0.00478316	4458	tags=69%, list=18%, signal=56%	10148/7048/868/3717/51561/5788/7292/384/975/8767/729230/3133/1794/8764/57045/26191/916/6850/3600/2000/3105/940/3965/7535
BP	GO:1903236	regulation of leukocyte tethering or rolling	15	-0.68827	-1.98243	0.000581111	0.00647488	0.00480568	3207	tags=67%, list=13%, signal=58%	5724/6484/3676/6403/729230/2526/6387/56477/10164/6366
BP	GO:0034329	cell junction assembly	385	-0.271392	-1.45861	0.000586172	0.006522	0.00484065	4221	tags=24%, list=17%, signal=20%	9379/60/11141/869/2596/26167/23129/92359/5747/55920/6622/2701/1006/22829/143098/3678/2048/3728/5457/91862/1613/57633/287/5786/5021/56132/26052/56131/71/387/261734/3655/28988/55737/1495/27286/8321/9647/4641/9270/389/7205/6548/6714/27253/2049/90952/347/7058/54549/59272/5583/4131/78999/3915/5879/23768/421/596/56133/79977/857/51738/402/6281/125111/1307/3673/9073/64218/1501/2042/10507/5175/4208/7070/8…
BP	GO:0031333	negative regulation of protein-containing complex assembly	119	-0.358128	-1.66452	0.000589449	0.00654916	0.00486081	4463	tags=34%, list=18%, signal=28%	57057/85477/5734/822/2629/147138/2314/54434/6622/11344/80206/6709/4133/50853/55737/51339/6812/2934/120/5216/6714/7114/7067/3925/5580/118/54209/11078/8543/83700/56937/1410/152485/6662/51451/9353/9168/11075/23521/54961/25999
BP	GO:0019722	calcium-mediated signaling	181	-0.328192	-1.61795	0.000601154	0.00666975	0.00495031	5576	tags=38%, list=22%, signal=30%	79772/11123/1012/805/89/51024/5341/5788/5598/55784/10519/8600/3357/5533/845/1524/5737/5025/2905/643/2281/118461/283455/1907/6403/287/55607/729230/4776/683/100/808/50852/8877/1672/51643/1906/695/55273/27040/10134/7462/121665/6548/1193/5532/2274/5443/3270/916/6850/775/84174/29995/1235/51196/1910/54209/10663/5335/8445/6444/58529/7852/7535/10231/374403/1236/2833
BP	GO:0120254	olefinic compound metabolic process	149	0.333182	1.65219	0.00060303	0.00668109	0.00495873	6321	tags=44%, list=25%, signal=33%	57406/50640/57834/6777/4051/64577/1544/158584/1573/83875/126/84649/24/1557/30/1562/317749/6342/6716/10901/1543/284541/1579/130/8228/1576/8912/1558/6715/1572/3293/2166/125/8608/1555/1585/1586/147015/247/127/5959/1577/157506/7276/9563/54884/124/10728/1571/1559/66002/1958/133/10858/8694/216/10948/221955/5950/64600/80142/199974/1109/239/2053
BP	GO:0050858	negative regulation of antigen receptor-mediated signaling pathway	31	-0.55197	-1.94215	0.000604586	0.00668887	0.00496451	1963	tags=42%, list=8%, signal=39%	11314/3958/9404/7805/29085/26191/2874/84174/79037/23228/7070/4068/5777
BP	GO:0030326	embryonic limb morphogenesis	109	-0.380929	-1.7525	0.00060691	0.00669567	0.00496955	6627	tags=42%, list=26%, signal=31%	23322/1954/3227/22943/10018/84314/2249/26005/8323/5727/8854/3066/6468/257/1749/8434/4154/7474/2697/3238/5396/5915/2737/860/2254/79659/657/7289/2768/3065/652/4920/581/775/9742/7042/79977/4487/2719/51098/80144/65057/9464/6909/27152/51176
BP	GO:0035113	embryonic appendage morphogenesis	109	-0.380929	-1.7525	0.00060691	0.00669567	0.00496955	6627	tags=42%, list=26%, signal=31%	23322/1954/3227/22943/10018/84314/2249/26005/8323/5727/8854/3066/6468/257/1749/8434/4154/7474/2697/3238/5396/5915/2737/860/2254/79659/657/7289/2768/3065/652/4920/581/775/9742/7042/79977/4487/2719/51098/80144/65057/9464/6909/27152/51176
BP	GO:0051208	sequestering of calcium ion	112	-0.36976	-1.70424	0.000616732	0.00678709	0.0050374	4750	tags=35%, list=19%, signal=28%	3357/845/25/387129/3596/6622/5031/22821/2281/6376/3932/287/6373/808/8996/126306/4067/930/255231/1193/55283/3270/581/6717/775/4283/3627/5335/1535/5144/7070/11151/3710/5777/5587/7220/6363/1236/6366
BP	GO:0010035	response to inorganic substance	488	0.245158	1.42143	0.000616929	0.00678709	0.0050374	2970	tags=22%, list=12%, signal=20%	664/7779/2729/4489/1393/338/10587/2643/144402/85365/6505/5888/84919/673/6857/4499/18/1147/2243/54407/8913/8893/7036/1956/4501/4493/51022/9131/3791/2395/4495/5562/552/170506/3981/8737/4496/7337/948/5151/6647/2203/6652/5444/375611/284111/1544/3931/2618/929/10105/2266/3795/1965/351/4494/847/10165/540/414301/5224/4734/2176/4233/1373/7001/359/4891/1719/7781/91683/5516/64924/7415/5176/1543/341359/2822/…
BP	GO:0043087	regulation of GTPase activity	313	-0.284244	-1.48885	0.000619059	0.00680096	0.0050477	6188	tags=38%, list=25%, signal=29%	409/3688/10681/2149/153090/10235/10451/10959/6422/22930/23654/102723859/141/84253/4908/115704/5924/5922/4915/9905/585/154796/7409/23637/54828/7248/5863/25780/65078/5365/26037/128272/858/7474/6361/6357/116/8412/81704/54959/23129/2044/5747/4739/55920/6369/153/129049/2041/10411/6367/57326/3265/22821/55619/139818/5999/9462/9649/51735/274/6376/128637/266747/6362/8826/22841/1123/57580/6347/958/3655/575…
BP	GO:1901224	positive regulation of NIK/NF-kappaB signaling	63	-0.441345	-1.83763	0.000621647	0.00681984	0.00506171	2733	tags=32%, list=11%, signal=28%	942/3611/387/54106/8877/1906/10616/7805/7205/11156/10392/3430/54209/8717/81/939/51284/6188/3965/6363
BP	GO:0033013	tetrapyrrole metabolic process	59	0.439321	1.86621	0.000626581	0.00686434	0.00509474	6841	tags=58%, list=27%, signal=42%	2395/645/1544/1244/22/113235/4891/1543/211/3145/28234/3263/8803/51629/166785/171425/10599/259/54657/210/81853/10857/2235/5826/25974/11330/23456/11309/402055/28978/7389/3162/7390/54977
BP	GO:0044703	multi-organism reproductive process	191	-0.320708	-1.58446	0.000632102	0.00691516	0.00513246	4956	tags=30%, list=20%, signal=24%	7319/3976/8434/5724/6833/2697/116/5737/7351/150921/4318/8605/5066/340784/3678/952/3488/5021/6863/5997/5914/5228/6019/150/1906/10155/81539/824/3675/5368/639/2192/5764/8614/59272/7076/5125/780/53405/6513/596/7026/51738/2182/1307/3673/6696/7216/85360/397/3691/5270/3490/682/3965/54361/23641
BP	GO:0001913	T cell mediated cytotoxicity	46	-0.491125	-1.91193	0.000634462	0.0069313	0.00514444	5149	tags=61%, list=20%, signal=49%	51561/3123/5788/3004/3135/3821/911/1512/100507436/567/5551/3071/3592/910/3594/3140/909/3133/1075/913/5532/3136/3105/11035/3122/3106/3134/3575
BP	GO:0042060	wound healing	388	-0.27237	-1.46697	0.000640022	0.0069823	0.00518229	4826	tags=30%, list=19%, signal=25%	5028/84062/5754/2159/51510/2828/7128/128272/7474/5728/6833/8324/5912/859/3043/81029/3640/54959/60/6814/2778/5747/2737/3315/3265/23173/3678/8546/2048/1839/6484/6376/10630/3932/6403/7039/375033/1265/5154/4627/3611/2621/1609/5119/71/958/387/57132/7103/29082/1511/4352/6812/2263/150/4067/59/308/5058/1465/1906/959/83706/2768/7301/2162/5328/389/2192/58189/6714/7168/10544/7076/57175/977/780/1277/7454/685…
BP	GO:0050729	positive regulation of inflammatory response	127	-0.357238	-1.68888	0.000647938	0.00705883	0.00523909	4825	tags=37%, list=19%, signal=30%	10318/8600/4889/2828/7474/4818/7292/5734/101/975/6369/7098/6622/6376/729230/55450/54106/245928/3133/81030/695/3603/1075/2113/29108/961/4049/2167/3430/8673/3600/54209/8717/3673/5603/241/81793/940/6223/51284/51704/834/63940/2896/5294/1236/4192
BP	GO:0008206	bile acid metabolic process	46	0.473926	1.90152	0.000650923	0.00707883	0.00525394	6374	tags=59%, list=25%, signal=44%	2494/5007/5825/114880/6770/570/51302/30/6342/80270/1066/10998/1582/3028/6718/5629/23600/114883/11001/6822/1581/134429/10858/8647/3952/1109/1593
BP	GO:0006399	tRNA metabolic process	136	0.337773	1.66123	0.000652485	0.00707883	0.00525394	4002	tags=29%, list=16%, signal=25%	54517/51091/127253/285605/55520/23405/80324/57176/124454/79731/55157/60528/23404/221078/54802/10557/84267/339175/54888/2926/10785/150962/57505/3028/80746/55699/55140/64172/10775/60487/84705/55253/2193/283459/51010/80222/4234/10056/51367/92935
BP	GO:0034612	response to tumor necrosis factor	217	-0.307051	-1.54594	0.000652167	0.00707883	0.00525394	3097	tags=24%, list=12%, signal=22%	6376/6362/22954/11173/965/3611/2621/6347/255743/958/149951/8996/7188/8877/10670/7186/1906/8764/7805/29108/427/8784/7114/608/10365/2874/1277/6850/2167/2634/7293/8717/10344/10068/81/6352/1535/6188/834/5595/6772/8718/55504/27242/10537/3476/2950/6363/9181/83483/10673/6366/83643
BP	GO:0006488	dolichol-linked oligosaccharide biosynthetic process	17	0.66466	2.05991	0.000663403	0.0071741	0.00532465	6864	tags=65%, list=27%, signal=47%	79053/85365/9526/57171/91869/29929/10195/79796/79644/56052/79947
BP	GO:0036230	granulocyte activation	41	-0.490302	-1.85747	0.000664014	0.0071741	0.00532465	3357	tags=49%, list=13%, signal=42%	6688/729230/57580/3684/6810/1511/10394/11314/3689/6813/7305/6850/5580/3600/306/6352/6372/2896/301/6844
BP	GO:0007179	transforming growth factor beta receptor signaling pathway	178	-0.319773	-1.5728	0.000662623	0.0071741	0.00532465	4966	tags=31%, list=20%, signal=25%	94031/283149/51341/55198/25805/858/7157/859/9839/5654/7791/8516/5747/3693/4093/161742/10637/10273/3326/6688/26524/124857/10755/255743/4435/1601/79674/657/9404/57178/3675/57045/114990/6714/5300/650/2734/2022/55612/7042/10252/857/1281/2348/11117/2615/65997/1278/2530/56937/27122/1028/2331/8425/9719/7041
BP	GO:0010717	regulation of epithelial to mesenchymal transition	85	-0.400243	-1.76316	0.000677409	0.00730873	0.00542457	3021	tags=27%, list=12%, signal=24%	10630/653/1601/8313/2296/114990/147906/652/650/2022/1277/7042/10252/182/25937/23187/2042/23275/10439/58495/51176/4192/7041
BP	GO:0006534	cysteine metabolic process	11	0.717841	1.93162	0.000697805	0.00751708	0.00557921	4963	tags=73%, list=20%, signal=58%	2729/875/4357/7263/1036/189/51380/2730
BP	GO:0001763	morphogenesis of a branching structure	191	-0.31921	-1.57706	0.000698638	0.00751708	0.00557921	4798	tags=30%, list=19%, signal=25%	10371/57471/7474/51548/7075/6789/9723/57057/7484/5314/25/859/23129/5499/2737/1512/1305/4776/5154/3611/255743/4435/9620/3082/2263/5058/1906/23213/3202/284217/639/6714/652/650/780/2022/1282/596/2736/10252/79977/5361/4070/2719/6692/6768/2294/6662/846/53335/1909/9353/6909/54361/6943/10653/51176/4192
MF	GO:0008395	steroid hydroxylase activity	36	0.524944	2.00519	0.000702152	0.0075426	0.00559815	6494	tags=64%, list=26%, signal=47%	1544/1573/64816/1557/51302/1562/1589/1543/1582/1576/1558/1572/1555/1585/1586/1577/1581/1571/1559/10858/54905/1593/1553
MF	GO:0016229	steroid dehydrogenase activity	30	0.542759	1.96315	0.000702936	0.0075426	0.00559815	6185	tags=57%, list=25%, signal=43%	3295/345275/3290/6716/80270/8630/3028/6718/51171/6715/3293/51170/8608/5959/50814/79644/1109
BP	GO:0043586	tongue development	18	-0.64467	-1.9539	0.000707514	0.00758134	0.0056269	5713	tags=61%, list=23%, signal=47%	7480/3066/6899/2737/3065/80326/54796/3815/9464/27152/51176
BP	GO:0032753	positive regulation of interleukin-4 production	25	-0.580111	-1.95848	0.000715112	0.00765229	0.00567956	5718	tags=60%, list=23%, signal=46%	7784/2207/7292/3662/114548/942/5914/3133/959/8140/916/6850/54440/940/3965
BP	GO:0033002	muscle cell proliferation	174	-0.328381	-1.6085	0.000718488	0.00767792	0.00569859	5373	tags=34%, list=21%, signal=27%	1012/93649/7040/3654/1264/388585/4889/7128/5728/5724/2697/57057/26281/3596/4318/5031/10203/1839/5739/6376/2006/3592/3488/2254/8862/387/4883/657/23414/2263/9510/1906/2768/2296/3065/3486/7168/347/652/650/59272/284/4854/7042/9686/3600/199/55810/3673/6352/1535/4208/4209/2771/6772/6909/5155/30008/5159/80310
MF	GO:0097493	structural molecule activity conferring elasticity	11	-0.724882	-1.89479	0.000721866	0.00769303	0.0057098	3059	tags=55%, list=12%, signal=48%	2006/10516/3915/2199/84034/11117
CC	GO:0005874	microtubule	351	-0.276701	-1.47151	0.000721168	0.00769303	0.0057098	5305	tags=30%, list=21%, signal=24%	805/112714/246176/11004/1062/54828/9212/374654/29911/283349/81930/55137/7278/84617/91752/51510/89796/3833/55835/143/6790/79739/3832/6645/4599/2009/259266/55920/29127/84861/55614/57326/3619/3800/11104/90990/10397/51199/2010/3831/6903/2622/79848/8826/7756/4135/79659/11186/10300/83593/4133/84790/10112/5119/26052/55201/9493/25809/57132/7461/54820/10263/9793/29082/808/83657/8655/3797/8766/56992/79745/…
BP	GO:0033540	fatty acid beta-oxidation using acyl-CoA oxidase	12	0.719233	1.99933	0.000731916	0.0077758	0.00577123	5153	tags=75%, list=20%, signal=60%	51/30/6342/26063/23600/54677/8309/1384/1962
BP	GO:0048251	elastic fiber assembly	11	-0.724538	-1.89389	0.000730724	0.0077758	0.00577123	1186	tags=55%, list=5%, signal=52%	4629/10516/1281/11117/30008/4239
BP	GO:0051640	organelle localization	454	-0.262107	-1.43209	0.000732611	0.0077758	0.00577123	5270	tags=29%, list=21%, signal=23%	5872/11004/1062/5341/10494/9212/2624/1063/83930/81930/84062/51510/55166/858/5728/10016/3833/2697/5314/2241/859/5865/3692/3596/55212/8677/10097/115827/6814/583/4292/259266/2011/1488/6622/54732/3619/8546/81620/3800/29899/23241/5899/3676/10053/55062/274/440279/3281/4135/2647/10300/23400/51762/4627/9696/4133/7534/5119/55201/6810/57132/54820/3996/29082/7405/3797/867/4644/6812/4067/8766/7514/6616/695/5…
BP	GO:0033628	regulation of cell adhesion mediated by integrin	45	-0.48714	-1.87897	0.000733984	0.00777983	0.00577422	3000	tags=42%, list=12%, signal=37%	3071/100/4067/83706/9404/5328/9270/916/6850/55612/7042/6352/23075/5420/83700/54997/5294/5777/6366
BP	GO:1990778	protein localization to cell periphery	307	-0.283859	-1.48808	0.000737746	0.00780915	0.00579598	4387	tags=27%, list=17%, signal=22%	598/859/5865/60/5911/975/115827/5913/583/92359/2905/55204/1804/3265/51201/64130/2048/29899/20/23241/3728/483/23043/51735/582/10098/287/51762/2621/84455/6810/1601/11031/196383/1173/55737/4644/6812/9495/8766/6616/3958/23433/9528/3675/116372/23114/9270/403/10550/9179/10791/10133/5583/27237/4926/23096/85409/537/8673/288/857/30846/92162/4118/6281/54209/2042/245812/54997/55690/682/2239/55625/10077/8387…
BP	GO:0062012	regulation of small molecule metabolic process	288	0.27368	1.48425	0.000741557	0.00783889	0.00581806	6424	tags=37%, list=26%, signal=28%	83752/2819/51422/338/3170/57486/5167/34/5164/51360/5562/552/6095/2875/6647/2981/2203/2646/3795/351/6770/84649/32/10499/9611/5465/11160/10613/3479/551/51805/116519/10891/1066/7124/7415/9626/2822/51085/55022/5027/4837/2693/10269/5581/5208/33/79660/3949/10580/5629/6774/1642/142/114899/5447/50487/2308/171425/672/6521/634/37/2330/2695/130013/26330/1581/4609/157506/3481/335/2642/978/9563/11315/208/2641…
BP	GO:0042537	benzene-containing compound metabolic process	23	0.603646	2.05566	0.000747225	0.00788816	0.00585462	3375	tags=52%, list=13%, signal=45%	6999/8942/8564/51166/64577/5446/2806/30/125061/6716/2184/23498
MF	GO:0008139	nuclear localization sequence binding	19	0.634869	2.02891	0.000750311	0.00791007	0.00587089	3954	tags=58%, list=16%, signal=49%	3836/79711/9972/3839/9883/23633/26953/9478/4928/9221/3838
BP	GO:0006957	complement activation, alternative pathway	16	0.649124	1.98456	0.000757151	0.00796076	0.00590851	1867	tags=56%, list=7%, signal=52%	731/727/735/732/3075/5199/629/718/81494
CC	GO:0005684	U2-type spliceosomal complex	79	-0.406487	-1.78037	0.000756245	0.00796076	0.00590851	4915	tags=38%, list=20%, signal=31%	57461/83443/24148/10450/6637/10946/9343/51634/51691/6636/51503/6628/8449/56949/6638/23450/57819/51690/27258/6629/84811/25949/3550/10992/8896/9775/6633/153527/8175/10262
BP	GO:1901222	regulation of NIK/NF-kappaB signaling	87	-0.400376	-1.77126	0.000761604	0.00799056	0.00593062	2763	tags=30%, list=11%, signal=27%	114548/942/3611/9770/387/54106/8996/8877/1906/10616/7805/7205/11156/26191/7114/10392/3430/9516/54209/8717/81/939/51284/6188/3965/6363
BP	GO:0006119	oxidative phosphorylation	86	0.374133	1.70182	0.000762026	0.00799056	0.00593062	5862	tags=37%, list=23%, signal=29%	4718/2395/1327/201626/4720/4719/27069/10105/7124/7415/6391/51085/51103/7385/4706/6392/54205/374291/6472/4702/6389/4729/4731/7381/4609/4707/11315/1738/79085/84275/125965/4714
CC	GO:0030496	midbody	169	-0.33237	-1.61952	0.000765247	0.00801361	0.00594774	6656	tags=43%, list=26%, signal=32%	92421/4218/60509/1785/54443/285331/200942/55226/22933/9525/2664/57553/84628/5727/1062/9212/5898/129531/1063/84440/84062/51510/2079/51097/6790/51100/822/5911/259266/55958/55920/54434/29127/3619/339416/9960/11104/5899/26112/8826/10300/23503/10112/5119/9493/1400/9600/387/57132/79801/29082/7405/11258/6867/3603/311/2669/7251/23636/403/11336/4628/302/9055/5300/5585/6513/23568/11078/84445/51646/2771/647…
BP	GO:0045722	positive regulation of gluconeogenesis	12	0.717337	1.99406	0.000779136	0.00814816	0.0060476	4817	tags=75%, list=19%, signal=61%	2875/84649/5465/10891/4837/1642/2308/2641/5771
CC	GO:0005681	spliceosomal complex	152	-0.333601	-1.60949	0.000781373	0.00816066	0.00605687	4915	tags=32%, list=20%, signal=26%	57461/83443/24148/51729/53938/103/10713/10450/3183/10181/6637/79706/5935/8458/10946/9343/143884/51634/51691/6636/51503/6628/8449/56949/6638/23450/57819/3958/6626/51690/27258/6629/84811/25949/10569/3550/27316/10992/8896/3178/9775/6633/153527/1153/8175/22913/10262/10465
BP	GO:0034754	cellular hormone metabolic process	131	0.342358	1.67187	0.000787471	0.0082134	0.00609602	5626	tags=44%, list=22%, signal=35%	3295/6777/1592/64577/1544/83875/126/84649/2099/1562/1381/7363/6716/7364/54659/10901/1589/8630/1543/3028/59338/130/15/6817/6718/8228/1576/8912/1558/6715/3293/51170/125/8608/6783/1585/1586/147015/127/5959/10720/1577/54577/157506/7276/54884/124/340665/1559/1958/133/10858/1889/10202/8694/216/10948/54905
BP	GO:1900426	positive regulation of defense response to bacterium	12	-0.722779	-1.94268	0.000795403	0.00827197	0.00613949	685	tags=33%, list=3%, signal=32%	1535/84034/11117/2896
CC	GO:0098562	cytoplasmic side of membrane	173	-0.325988	-1.5925	0.000796255	0.00827197	0.00613949	5880	tags=39%, list=23%, signal=30%	55966/6769/2534/5605/640/2670/2280/55359/56616/5753/5788/346562/7054/858/9630/5728/6155/2788/2241/6503/2778/27429/5747/29127/1917/94235/2787/6231/3728/22821/7053/3932/8826/2760/4627/387/5997/29082/6235/7188/9495/5778/2782/2793/7186/4067/30820/6616/2768/2769/2669/55072/121665/26191/6714/6850/2791/5879/2539/9516/1915/914/5996/6277/2771/3815/7535
BP	GO:0090287	regulation of cellular response to growth factor stimulus	266	-0.292608	-1.50188	0.000795639	0.00827197	0.00613949	6334	tags=36%, list=25%, signal=28%	22943/4015/54778/4091/2255/222663/63976/153090/2249/25928/6498/94/6422/53918/28514/2280/93649/7040/8573/94031/283149/23090/51341/388585/25805/858/7474/10016/7157/57057/22905/25/859/9839/5654/81792/79176/387914/8516/10140/860/161742/3678/10273/3326/26524/124857/3592/10755/2254/3611/8862/255743/4435/1601/51232/79674/147372/23213/8321/3675/57045/4641/25865/11156/114990/5300/652/650/2734/2022/4926/55…
BP	GO:0006577	amino-acid betaine metabolic process	17	0.659599	2.04423	0.000798986	0.00828935	0.00615239	5000	tags=65%, list=20%, signal=52%	29958/501/34/55217/33/8424/5447/54677/1384/1374/223
BP	GO:0006576	cellular biogenic amine metabolic process	94	0.370357	1.7177	0.000802193	0.00831161	0.00616891	5392	tags=41%, list=21%, signal=33%	6999/8942/29958/5053/2643/6505/18/501/8564/6581/196743/2639/1814/6799/125061/1644/217/79814/4837/314/15/6817/445329/23498/262/4128/222236/27284/3176/4129/130013/3251/2903/11315/6620/6818/25953/2034/51582
BP	GO:0032623	interleukin-2 production	58	-0.443594	-1.81556	0.000815437	0.00842654	0.00625421	5149	tags=40%, list=20%, signal=32%	5788/5142/7128/25/3662/8767/6441/729230/942/7186/64170/7805/25865/84433/916/79679/89795/54440/940/5144/6188/301/947
BP	GO:0032663	regulation of interleukin-2 production	58	-0.443594	-1.81556	0.000815437	0.00842654	0.00625421	5149	tags=40%, list=20%, signal=32%	5788/5142/7128/25/3662/8767/6441/729230/942/7186/64170/7805/25865/84433/916/79679/89795/54440/940/5144/6188/301/947
BP	GO:0071604	transforming growth factor beta production	41	-0.486851	-1.8444	0.000820736	0.00847013	0.00628656	3435	tags=34%, list=14%, signal=30%	3326/6376/657/3685/7305/55612/7042/1281/10159/4060/2615/3965/100133941/947
MF	GO:1901567	fatty acid derivative binding	22	0.587131	1.95818	0.000828904	0.00854317	0.00634077	5610	tags=55%, list=22%, signal=42%	4329/91452/2639/3030/6342/33/37/1622/165140/8435/134526/64746
BP	GO:0006958	complement activation, classical pathway	34	0.525763	1.96258	0.000847841	0.00872686	0.00647711	2793	tags=50%, list=11%, signal=45%	731/727/735/729/10747/325/732/721/720/1191/722/718/715/716/717/725/51279
BP	GO:0060973	cell migration involved in heart development	20	-0.621847	-1.97498	0.000851084	0.00874874	0.00649335	2041	tags=35%, list=8%, signal=32%	1906/652/2022/2348/9464/1909/5159
BP	GO:0010823	negative regulation of mitochondrion organization	46	0.468157	1.87837	0.000862847	0.00882334	0.00654872	2505	tags=33%, list=10%, signal=29%	664/2729/3375/2395/27069/666/10105/3479/551/1191/291/10449/10075/3303/51499
BP	GO:0050679	positive regulation of epithelial cell proliferation	177	-0.321504	-1.58211	0.000860887	0.00882334	0.00654872	4926	tags=33%, list=20%, signal=27%	2624/5365/1749/7051/6331/3357/7128/858/7474/10016/51548/9037/5314/8324/5654/54959/6369/3265/7423/3676/7039/2254/653/6776/57599/8862/113174/657/51157/5228/3164/2263/25865/79805/79031/26051/5764/5293/652/650/252983/3915/6387/51738/2064/10344/5335/1535/3912/2896/3148/6662/7424/5155/5587/2152/8742/4192
BP	GO:0042742	defense response to bacterium	241	-0.306378	-1.56365	0.00086177	0.00882334	0.00654872	3973	tags=25%, list=16%, signal=22%	280664/57674/7098/140850/6464/8767/84659/81035/100507436/6441/6403/3592/3934/115361/944/245932/57402/54106/3140/1672/1511/245928/3133/10616/4939/64170/8764/55072/9636/29108/4069/1690/56833/10133/6170/10392/6850/5580/9466/3543/4049/2634/54209/3105/306/6992/1535/6156/84034/6223/6372/10417/11117/23208/2896/6039/3148/358/5587/7100/3575
BP	GO:0010975	regulation of neuron projection development	387	-0.26778	-1.4408	0.000862626	0.00882334	0.00654872	6228	tags=35%, list=25%, signal=27%	23373/7436/9139/8428/2664/153090/6259/4076/6498/6422/50674/84628/5274/2534/4919/23654/7804/84079/6405/54437/4915/2670/3066/9856/10494/7248/57463/2895/5753/29882/10519/85458/65078/5365/26037/84062/112/5754/10371/91752/4803/3706/7474/5728/8724/9037/9723/818/25/7869/5911/56920/11141/5396/10097/23129/2931/10500/2011/154141/2048/7533/567/2281/11344/952/23043/140578/51199/6376/4135/4776/10300/1123/653/…
BP	GO:0007249	I-kappaB kinase/NF-kappaB signaling	257	-0.299018	-1.52904	0.000874199	0.00892778	0.00662623	5752	tags=35%, list=23%, signal=27%	2534/4919/3123/8878/7329/7088/124583/60401/2280/134728/5966/3654/28952/10318/4057/8600/3357/7128/7474/161725/2697/25/1524/51311/1936/5971/684/7098/3315/399/8767/554/10346/80833/6376/353376/22954/81603/57161/958/387/54106/7188/56674/7186/1906/695/10616/64170/6284/55072/29108/23636/389/3065/84433/10133/55179/57153/10392/117854/284/84336/9516/11040/51246/1910/54503/54209/6737/1902/8717/11035/51284/5…
BP	GO:0038065	collagen-activated signaling pathway	15	-0.673644	-1.9403	0.000878215	0.00894546	0.00663936	4036	tags=60%, list=16%, signal=50%	1287/4921/1285/780/1277/6850/1282/3673/1284
BP	GO:0022904	respiratory electron transport chain	82	0.377338	1.70372	0.000877209	0.00894546	0.00663936	4577	tags=33%, list=18%, signal=27%	2819/4718/2110/1327/4720/4719/27069/79751/10165/6390/10891/6391/51103/2109/4706/83733/6392/54205/374291/4702/6389/4729/2108/4731/7381/4707/11315
BP	GO:0046031	ADP metabolic process	83	0.377183	1.71518	0.000880012	0.00895213	0.0066443	4276	tags=36%, list=17%, signal=30%	2819/51422/2584/5562/2203/2027/351/55526/5224/9611/5465/3479/53632/229/5236/203/3939/51085/5027/5313/5208/3101/55753/6774/6521/53343/3099/4967/26330/4609
BP	GO:0002686	negative regulation of leukocyte migration	40	-0.496344	-1.8634	0.000881549	0.00895612	0.00664727	2694	tags=40%, list=11%, signal=36%	653/6347/100/134/2841/11314/79890/56833/347/9466/6387/56477/4681/11117/9353/6366
BP	GO:0050777	negative regulation of immune response	165	-0.319981	-1.55145	0.000892799	0.00905868	0.00672339	6981	tags=45%, list=28%, signal=33%	79132/11006/6773/259307/4938/2302/3824/10039/56940/127943/409/60343/1380/9111/2534/3123/9655/966/10875/84166/4940/5788/10906/4889/11005/7128/3135/3428/7292/2241/384/3821/84695/103/100507436/64092/6688/56339/5133/3071/729230/6504/3133/4067/11314/3958/7376/7301/8764/9636/6714/56833/5532/6850/9466/54209/1493/6737/3105/5335/1281/79651/6223/8815/10225/2896/3635/301/3106/3965/2294/5777/3134/3575
CC	GO:1990204	oxidoreductase complex	102	0.357632	1.67459	0.000894094	0.00906008	0.00672442	4999	tags=35%, list=20%, signal=28%	2819/594/4718/5164/4720/4719/847/593/6390/3939/84869/92259/50508/6391/51103/2109/7385/55753/4706/6392/374291/55572/1629/4702/6389/4729/3419/4967/2731/2108/4731/7381/4707/5162/8050/1738
BP	GO:0035303	regulation of dephosphorylation	103	-0.375468	-1.70993	0.000900864	0.00910512	0.00675786	5379	tags=42%, list=21%, signal=33%	115352/2280/9891/805/7040/5341/7248/5788/7529/23293/2029/2629/3326/2281/3071/8826/1460/51231/255743/134/808/11314/3958/2768/8898/121665/6714/26051/5300/650/5580/7042/57181/3673/6992/5504/10507/23075/11035/4208/2771/3476/5159
BP	GO:0034762	regulation of transmembrane transport	488	-0.259307	-1.4191	0.000899802	0.00910512	0.00675786	4596	tags=26%, list=18%, signal=22%	51548/5724/845/6833/170850/25/5354/859/387129/93107/3596/5243/55799/6536/6330/4318/60/60598/51686/6814/2859/53826/2931/117531/6622/65268/3764/5031/1804/57620/2048/8911/23416/3762/7533/3755/483/2281/6041/5999/89822/274/6376/3460/3751/6332/287/729230/2171/6373/6347/5997/3769/54106/808/126306/823/81831/150/4067/30820/1906/84329/6236/23433/2669/10312/28954/8682/9965/930/6548/1193/10550/7114/3270/5927…
BP	GO:0021952	central nervous system projection neuron axonogenesis	22	-0.582631	-1.91115	0.00091179	0.00920368	0.00683101	3471	tags=45%, list=14%, signal=39%	2048/51199/9201/2049/2736/4929/1009/113246/9353/2051
BP	GO:0006820	anion transport	466	0.243243	1.40002	0.000913595	0.00921003	0.00683572	4812	tags=29%, list=19%, signal=24%	10478/50640/10060/94081/6505/23516/18/5167/54407/8564/255189/284439/23443/389015/5562/552/23204/120103/5825/10246/8737/51706/23428/948/375611/284111/6581/1244/79751/26279/8864/2542/1814/6573/28231/10165/123041/85320/113235/6582/23169/55244/1468/551/9429/4257/57468/94097/54659/291/1066/7124/6514/10998/2917/114571/256987/4547/388323/6567/159963/23507/6529/6554/5027/11255/1579/133482/51463/28234/937…
BP	GO:0070232	regulation of T cell apoptotic process	32	-0.547372	-1.93768	0.00091681	0.00923055	0.00685095	4662	tags=50%, list=19%, signal=41%	7474/7157/57864/384/81704/101/5133/100/3958/652/1831/6352/11035/939/3965/3575
BP	GO:0031124	mRNA 3'-end processing	51	0.448896	1.84242	0.000929761	0.00934894	0.00693882	7348	tags=55%, list=29%, signal=39%	55339/79882/10914/22849/170506/25888/351/87178/2926/29894/53981/677/1479/904/29101/10898/81608/64852/51692/8189/134353/54623/23283/5433/7884/11052/1477/4686
BP	GO:0006390	mitochondrial transcription	10	0.737312	1.92331	0.000933883	0.00936633	0.00695173	5294	tags=60%, list=21%, signal=47%	64216/5562/133522/6182/7019/84275
MF	GO:0008509	anion transmembrane transporter activity	286	0.270167	1.46703	0.000933032	0.00936633	0.00695173	4812	tags=30%, list=19%, signal=25%	10478/10060/94081/6505/23516/54407/284439/23443/389015/120103/23428/948/375611/284111/6581/1244/79751/2542/6573/28231/10165/6532/123041/85320/113235/6582/23169/55244/1468/9429/57468/94097/291/6514/114571/256987/6580/159963/23507/6529/133482/51463/28234/9376/246213/10864/6520/6542/8402/84561/9963/2557/23315/83733/153129/118980/368/2559/6506/9962/1180/653519/6570/6571/9197/115111/6521/8542/5172/510…
BP	GO:2000404	regulation of T cell migration	42	-0.494267	-1.88319	0.000960227	0.00961823	0.00713869	4662	tags=45%, list=19%, signal=37%	6278/7474/81704/101/3676/729230/387/8764/29108/347/9466/1235/6387/199/3627/6352/11035/27347/6366
BP	GO:0060438	trachea development	18	-0.636988	-1.93062	0.000962738	0.00961879	0.0071391	2399	tags=39%, list=10%, signal=35%	5914/3202/652/5595/2294/6662/51176
CC	GO:1904724	tertiary granule lumen	53	-0.443158	-1.76986	0.000961979	0.00961879	0.0071391	5459	tags=53%, list=22%, signal=41%	124583/10562/10321/4057/6947/25797/3043/4318/1476/1512/5646/567/6709/1265/28988/10394/226/2919/427/1471/4069/1509/4048/3608/5768/7077/51646/5777
BP	GO:1902624	positive regulation of neutrophil migration	29	-0.554763	-1.94069	0.000968109	0.00966013	0.00716979	3000	tags=38%, list=12%, signal=33%	3071/4267/2526/1906/5879/5880/972/6363/1236/4192/6366
CC	GO:0071013	catalytic step 2 spliceosome	71	-0.412036	-1.76349	0.000986954	0.00983564	0.00730005	4915	tags=39%, list=20%, signal=32%	57461/24148/53938/10450/3183/6637/10946/9343/6636/51503/6628/56949/6638/23450/57819/51690/27258/6629/25949/10569/27316/10992/8896/3178/9775/6633/8175/22913
BP	GO:0071900	regulation of protein serine/threonine kinase activity	333	-0.279519	-1.47363	0.000988994	0.00984345	0.00730584	5364	tags=32%, list=21%, signal=25%	219771/8812/93649/805/2322/7040/5788/3654/10519/4057/84062/8600/3357/7128/7474/2810/5728/6789/11140/25/859/56034/101/2629/60/50507/5716/6622/11142/3619/4254/3265/10309/8325/3326/890/901/8654/8115/5899/26524/7039/8826/5154/9133/1033/958/387/9802/1601/657/5997/54106/808/7405/245928/5570/150/7186/4067/5058/1906/959/1436/4486/11314/7016/1856/10125/5569/7251/29108/23636/26191/7345/6714/652/650/4920/68…
BP	GO:0003197	endocardial cushion development	46	-0.481593	-1.87482	0.000991819	0.00985903	0.00731741	2694	tags=30%, list=11%, signal=27%	653/657/55273/140628/652/650/2022/7042/4487/182/26508/2294/6662/6909
BP	GO:0045576	mast cell activation	60	-0.4396	-1.80354	0.000993626	0.00986447	0.00732145	2202	tags=48%, list=9%, signal=44%	5729/640/146722/2624/2241/3596/399/10397/10666/867/6812/4067/695/11314/27040/10125/6284/7462/6813/5293/6850/8673/5730/5294/3965/2294/3815/5777/5880
BP	GO:0006084	acetyl-CoA metabolic process	31	0.521793	1.90408	0.00099751	0.0098905	0.00734077	5122	tags=48%, list=20%, signal=39%	6999/5164/51166/38/32/10157/3158/51268/5162/134526/8050/23181/23417/1738/5161
BP	GO:0060840	artery development	92	-0.391174	-1.74877	0.00100001	0.00989293	0.00734258	2426	tags=25%, list=10%, signal=23%	657/7798/1906/57178/639/2296/652/2022/4854/7042/6659/182/1281/2348/2294/9464/1909/6909/30008/4016/5159/4192/144165
BP	GO:0030099	myeloid cell differentiation	335	-0.276851	-1.46253	0.00100028	0.00989293	0.00734258	2660	tags=20%, list=11%, signal=18%	4627/116071/2194/9770/10006/7564/5914/22985/8563/51621/4352/4067/1436/212/3707/3202/5613/6208/3589/10312/2113/9636/60682/6714/302/5293/7067/652/10766/7305/4920/10365/10163/4286/10320/537/2539/10234/3600/2124/54209/182/140685/25979/2719/6223/4208/6194/3059/8111/3635/4211/338382/139716/1028/54997/3148/10272/6772/3815/5777/10537/972/6363/1236/51176
BP	GO:0032351	negative regulation of hormone metabolic process	11	-0.715565	-1.87043	0.00100582	0.00989772	0.00734612	2694	tags=55%, list=11%, signal=49%	653/476/650/2672/27122/54361
CC	GO:0005778	peroxisomal membrane	57	0.434518	1.82642	0.00100533	0.00989772	0.00734612	5112	tags=46%, list=20%, signal=36%	8800/3295/10478/50640/2180/5825/5194/51/91452/847/4257/10901/5827/26063/5189/4077/55825/11001/84896/8504/5830/23305/92960/5824/5826/8540
CC	GO:0031903	microbody membrane	57	0.434518	1.82642	0.00100533	0.00989772	0.00734612	5112	tags=46%, list=20%, signal=36%	8800/3295/10478/50640/2180/5825/5194/51/91452/847/4257/10901/5827/26063/5189/4077/55825/11001/84896/8504/5830/23305/92960/5824/5826/8540
BP	GO:0008037	cell recognition	148	-0.336194	-1.61857	0.00100299	0.00989772	0.00734612	5256	tags=34%, list=21%, signal=27%	63923/22932/57463/2290/57829/2219/10371/2350/9037/81704/975/2596/9898/81035/2048/5551/10666/1462/4478/375033/7534/55118/1794/23022/226/3958/53340/1949/2049/2525/3543/152330/54209/2348/2042/5175/5322/10417/78989/91624/923/7852/682/4240/921/27242/4692/6363/8440/1236/6366
BP	GO:0006515	protein quality control for misfolded or incompletely synthesized proteins	23	0.59488	2.02581	0.00101104	0.00993665	0.00737502	6564	tags=61%, list=26%, signal=45%	83752/79699/55768/7415/6048/80311/9361/91445/8192/55284/115209/55658/10730/4287
BP	GO:0042733	embryonic digit morphogenesis	51	-0.455779	-1.80571	0.00102689	0.0100797	0.00748121	6508	tags=47%, list=26%, signal=35%	3227/10018/84314/26005/8323/3066/7474/2697/3238/2737/657/7289/2768/3065/652/4920/581/9742/79977/4487/51098/9464/6909/27152
BP	GO:0031400	negative regulation of protein modification process	436	-0.259154	-1.4091	0.00103669	0.0101632	0.00754319	3890	tags=24%, list=15%, signal=21%	80758/6598/64359/2041/6201/79706/6622/3315/4302/11142/6879/6135/161742/64092/2048/6688/2281/26524/3071/6418/55872/79007/6224/9770/1609/54541/11284/55450/7515/5997/808/3082/991/867/245928/10106/5570/4067/11314/3958/7016/9647/9528/9961/26277/5569/7251/9636/29108/6209/23636/9184/9270/2192/26191/3486/7345/26051/652/650/5252/5585/581/2874/284/2022/54900/5580/706/1031/2167/10491/2539/10252/7026/857/665…
CC	GO:0005938	cell cortex	263	-0.289517	-1.48519	0.00104381	0.0102202	0.0075855	4407	tags=29%, list=18%, signal=24%	23048/85477/2241/54509/22844/4650/60/10097/1487/7127/10518/5747/1488/4739/8605/10411/6622/399/1211/143098/29899/57595/130271/9833/2010/440279/55607/8826/10755/6709/26064/84552/4627/57085/387/3996/28988/1212/3927/2263/3918/7186/1627/2934/120/824/5216/9322/389/3880/11336/10487/1455/4628/53405/6513/4926/5879/1915/857/29091/26086/9783/7171/23187/81/4642/10398/3059/11151/2995/2026/1397/5587/4082/5880/…
CC	GO:0045239	tricarboxylic acid cycle enzyme complex	16	0.639028	1.9537	0.00105498	0.0103134	0.00765466	4999	tags=69%, list=20%, signal=55%	2271/594/593/92259/55753/8803/1629/3419/4967/8801/1738
BP	GO:1901343	negative regulation of vasculature development	87	-0.393892	-1.74258	0.00105596	0.0103134	0.00765466	4737	tags=37%, list=19%, signal=30%	11005/2828/3135/6833/7075/9723/22905/161742/729230/3339/5797/22846/9510/23213/3202/2296/1285/7058/10365/7042/51738/55810/6558/3627/64218/1284/1870/11117/6772/54361/1634/6678
BP	GO:0060348	bone development	205	-0.314437	-1.56466	0.00106588	0.0103973	0.00771691	4916	tags=32%, list=20%, signal=26%	51715/1749/4057/8600/7157/2697/56034/5734/81792/389058/2121/2778/5915/22856/3214/3638/2737/860/80263/64131/6137/158326/55790/4921/1305/11173/10006/387/5914/85301/54808/8313/2263/23213/7289/2296/4146/6714/302/652/26160/7305/650/2734/2022/1277/10163/537/10234/4487/51738/56987/1281/10507/4208/338773/633/8111/54796/4211/4209/6662/3815/5777/871/2261
BP	GO:0043039	tRNA aminoacylation	24	0.56515	1.94362	0.00106765	0.0104016	0.00772014	6293	tags=58%, list=25%, signal=44%	57176/124454/79731/55157/57505/55699/2193/283459/80222/10056/92935/80755/23395/79587
BP	GO:1904994	regulation of leukocyte adhesion to vascular endothelial cell	28	-0.557824	-1.93451	0.00106933	0.0104051	0.00772267	3207	tags=46%, list=13%, signal=41%	6484/3676/6403/729230/387/2526/2113/3689/6387/56477/10164/4192/6366
BP	GO:0031529	ruffle organization	46	-0.480965	-1.87237	0.00107516	0.0104488	0.00775516	2582	tags=41%, list=10%, signal=37%	51474/28988/1436/54849/5216/10312/7168/57175/51466/54869/5879/857/199/83478/4070/26751/1236/391/6366
BP	GO:0048661	positive regulation of smooth muscle cell proliferation	76	-0.405538	-1.75692	0.00107811	0.0104515	0.00775717	5373	tags=43%, list=21%, signal=34%	1012/7040/3654/388585/4889/5724/2697/3596/4318/5031/10203/1839/6376/3488/2254/657/2263/9510/1906/3065/652/4854/199/55810/3673/6352/1535/4209/2771/6772/5155/5159/80310
MF	GO:0140657	ATP-dependent activity	471	0.237635	1.36681	0.00107757	0.0104515	0.00775717	4511	tags=26%, list=18%, signal=21%	10146/83752/6594/4430/51703/10060/6683/5888/6296/1763/23405/79572/3329/2180/19/6832/64794/57130/5825/286410/27348/170506/3336/6687/221458/1244/487/22/23095/490/10845/80224/540/83990/85320/24/4640/56919/55729/9429/10693/10351/54505/51202/5928/23200/83473/22948/55210/23460/9188/9557/57647/10998/11269/7415/60625/10131/3308/10350/89797/5884/344905/51761/3508/54988/3303/55308/4625/3313/1654/399687/556…
BP	GO:0003151	outflow tract morphogenesis	77	-0.400938	-1.74884	0.0010876	0.0105305	0.00781576	4766	tags=34%, list=19%, signal=27%	4889/7474/57057/23129/64321/2006/3611/657/23414/2263/1906/8321/1856/2296/652/2022/7042/2535/182/54345/2348/4208/26508/9464/1909/6909
MF	GO:0005385	zinc ion transmembrane transporter activity	21	0.604545	2.00498	0.00109096	0.01055	0.00783027	6244	tags=67%, list=25%, signal=50%	7779/23516/7781/64924/55630/221074/7782/55532/283375/7922/29986/91252/55676/64116
BP	GO:0000028	ribosomal small subunit assembly	16	-0.651669	-1.90043	0.0011034	0.0106571	0.00790975	1893	tags=50%, list=8%, signal=46%	51065/3921/6208/6209/6232/6193/6223/6169
BP	GO:0010561	negative regulation of glycoprotein biosynthetic process	11	-0.712706	-1.86296	0.00111263	0.010733	0.0079661	5754	tags=73%, list=23%, signal=56%	9445/26574/1839/10347/9528/25825/9452/81618
BP	GO:0043550	regulation of lipid kinase activity	59	-0.438523	-1.79669	0.00111458	0.0107386	0.00797026	6052	tags=46%, list=24%, signal=35%	153090/79837/10451/5925/9655/2322/7040/975/5747/1917/5296/29062/388121/4067/930/6714/84174/5156/3815/5155/5587/5159/2261/6363/1236/6366/113791
BP	GO:0001914	regulation of T cell mediated cytotoxicity	38	-0.506957	-1.88573	0.00112722	0.0108338	0.00804086	5866	tags=61%, list=23%, signal=46%	51561/3123/5788/3135/3821/911/567/3071/3592/910/3594/3140/909/3133/913/5532/3136/3105/11035/3122/3106/3134/3575
BP	GO:0090092	regulation of transmembrane receptor protein serine/threonine kinase signaling pathway	238	-0.294616	-1.5024	0.00112603	0.0108338	0.00804086	6334	tags=37%, list=25%, signal=28%	22943/3717/4015/54778/4091/2255/222663/63976/25928/6498/94/6422/53918/11030/2280/9856/93649/7040/94031/283149/23090/51341/388585/25805/858/7474/7157/57057/25/859/9839/5654/79176/8516/10140/25970/161742/10637/10273/3326/392255/26524/124857/10755/2254/7272/653/1460/3611/255743/4435/1601/51232/79674/657/23213/8321/8483/3675/57045/114990/9688/5300/652/650/2734/2022/4926/55612/7042/10252/857/4487/1680…
BP	GO:0001894	tissue homeostasis	240	-0.289877	-1.47775	0.00112961	0.0108434	0.00804801	4817	tags=30%, list=19%, signal=24%	4057/8600/7128/1200/6833/2697/57333/4520/56834/27134/101/60/79738/50507/10518/583/5025/54360/3315/5284/1512/58494/567/952/6441/582/729230/22954/580/55812/9696/21/71/261734/54106/53832/1436/54849/7033/145226/10312/2296/4069/6714/90952/581/284/6850/6513/54440/3915/596/10083/6558/25937/6456/6696/1281/5175/338773/83700/143689/3635/11151/6662/286676/27347/947/8842/3908/1513
CC	GO:0046540	U4/U6 x U5 tri-snRNP complex	29	-0.550771	-1.92672	0.00113359	0.0108551	0.00805667	4636	tags=59%, list=18%, signal=48%	26121/9129/9128/24148/10713/6637/9343/51691/6636/6628/6638/57819/51690/27258/6633/153527/10465
CC	GO:0097526	spliceosomal tri-snRNP complex	29	-0.550771	-1.92672	0.00113359	0.0108551	0.00805667	4636	tags=59%, list=18%, signal=48%	26121/9129/9128/24148/10713/6637/9343/51691/6636/6628/6638/57819/51690/27258/6633/153527/10465
BP	GO:0010563	negative regulation of phosphorus metabolic process	364	-0.270705	-1.44597	0.00113706	0.010875	0.00807147	5348	tags=31%, list=21%, signal=25%	2280/93649/805/624/89/7040/5341/5753/5788/91663/7529/10519/84062/7128/5783/2029/2810/5728/51548/7157/25/23435/859/1353/103/2629/2931/2041/79706/6622/3315/11142/6879/161742/64092/2048/20/2281/28964/26524/3071/55872/8826/5154/79007/9770/1609/54541/55450/5997/808/3082/8655/867/245928/10106/5570/4067/11314/3958/7016/9647/9961/5569/7251/29108/23636/9270/2192/26191/3486/7345/26051/652/650/5585/581/284/…
MF	GO:0015171	amino acid transmembrane transporter activity	80	0.385623	1.72836	0.00114068	0.0108963	0.00808728	4456	tags=36%, list=18%, signal=30%	117247/94081/55089/6505/54407/120103/23428/9673/79751/10165/6582/55244/256987/6567/6529/246213/6520/6542/83733/153129/118980/6506/1497/124565/11136/8501/57709/4948/6534
MF	GO:0070330	aromatase activity	24	0.56303	1.93632	0.00114601	0.0109339	0.00811515	4989	tags=62%, list=20%, signal=50%	57834/4051/1544/64816/1557/1562/1543/1579/1576/1558/1572/1577/1571/1559/66002
BP	GO:0062013	positive regulation of small molecule metabolic process	126	0.338096	1.64199	0.00114886	0.0109344	0.00811555	5022	tags=36%, list=20%, signal=29%	2819/5562/552/2875/2981/351/6770/84649/5465/3479/551/116519/10891/1066/7124/7415/9626/2822/51085/55022/5027/4837/2693/5581/10580/1642/5447/50487/2308/171425/26330/1581/4609/157506/3481/335/11315/208/2641/5771/1374/2979/23417/134429/133
BP	GO:1903829	positive regulation of protein localization	387	-0.264897	-1.42529	0.00114779	0.0109344	0.00811555	3916	tags=25%, list=16%, signal=21%	27429/2931/2737/55204/10411/65985/3265/51201/81620/51768/2048/3326/29899/3728/5296/952/56257/2010/2622/4478/23400/9696/9662/2621/81603/84455/1459/3684/6810/919/10347/55737/9495/10155/3958/7016/7376/11190/51614/3675/10134/55072/7251/4641/54543/3689/10445/23636/9270/11156/6714/4628/5532/7305/149628/5583/27237/6717/5580/4926/85409/7042/288/51738/6659/23171/2064/5213/2182/54209/25937/54741/10055/2042…
BP	GO:0009064	glutamine family amino acid metabolic process	67	0.406253	1.78175	0.0011511	0.0109425	0.00812155	7267	tags=54%, list=29%, signal=38%	2729/7915/51166/2752/58510/10588/10841/5471/2746/2806/1373/8659/5198/26227/79814/383/435/92292/144193/2184/23576/56954/3034/2673/2730/4846/27165/445/493/64116/54529/4842/23409/4942/2747/1610
BP	GO:0021955	central nervous system neuron axonogenesis	30	-0.534054	-1.87532	0.00115641	0.0109795	0.00814906	3471	tags=40%, list=14%, signal=35%	2048/3326/51199/9201/79600/2049/2736/4929/1009/113246/9353/2051
BP	GO:0061138	morphogenesis of a branching epithelium	177	-0.318073	-1.56522	0.00116992	0.0110944	0.00823429	4662	tags=31%, list=19%, signal=25%	10371/7474/51548/7075/6789/9723/57057/7484/5314/25/859/23129/5499/2737/1512/4776/5154/3611/255743/4435/9620/3082/2263/5058/1906/23213/3202/284217/6714/652/650/780/2022/1282/596/2736/10252/79977/5361/4070/2719/6692/6768/2294/6662/846/1909/9353/6909/54361/6943/10653/51176/4192
CC	GO:0001891	phagocytic cup	26	-0.564443	-1.91831	0.00119473	0.011316	0.00839875	3106	tags=50%, list=12%, signal=44%	56990/353376/22841/375033/11031/10347/9322/9938/64005/199/23208/11151/301
CC	GO:0014069	postsynaptic density	284	-0.284955	-1.47772	0.00120746	0.0114227	0.00847801	4073	tags=25%, list=16%, signal=21%	2596/10097/5025/8516/80758/2905/401190/51201/64130/22829/9419/23043/28964/3751/55607/1821/2171/476/158866/10006/26052/55450/134/28988/9123/81831/55737/9495/150/4067/1627/9201/120/3631/6208/8898/85461/1949/6714/747/6232/4900/6132/4131/78999/6230/775/6804/10505/10486/6222/6175/6207/118/6136/1501/6156/6223/6188/64084/6169/23208/57689/1410/135/53335/23623/11178/8440/22883
BP	GO:0072376	protein activation cascade	16	0.63542	1.94267	0.00122303	0.0115561	0.00857697	3052	tags=56%, list=12%, signal=49%	2157/2165/2243/2266/350/3818/2335/2244/462
BP	GO:0043551	regulation of phosphatidylinositol 3-kinase activity	50	-0.461546	-1.82817	0.00122625	0.0115725	0.00858916	3304	tags=34%, list=13%, signal=30%	5296/29062/388121/4067/930/6714/84174/5156/3815/5155/5587/5159/2261/6363/1236/6366/113791
CC	GO:0009898	cytoplasmic side of plasma membrane	154	-0.32504	-1.57386	0.00124549	0.01174	0.00871349	5880	tags=38%, list=23%, signal=30%	55966/6769/2534/5605/640/55359/56616/5753/5788/346562/7054/858/9630/5728/2788/2241/6503/2778/27429/5747/29127/94235/2787/3728/22821/7053/3932/8826/2760/4627/387/5997/29082/7188/9495/5778/2782/2793/7186/4067/30820/6616/2768/2769/2669/55072/26191/6714/6850/2791/5879/2539/9516/914/5996/6277/2771/3815/7535
BP	GO:0000963	mitochondrial RNA processing	17	0.641807	1.98909	0.0012555	0.0118201	0.00877292	4649	tags=65%, list=18%, signal=53%	80324/6832/60528/87178/54802/3028/22868/60493/79072/10922/9238
BP	GO:1901616	organic hydroxy compound catabolic process	72	0.402595	1.77898	0.00126061	0.011854	0.00879806	5144	tags=49%, list=20%, signal=39%	57834/4051/6652/3612/54363/6799/51302/217/8630/57026/1579/6817/6718/1576/445329/10380/2184/3628/1591/2710/4128/27284/6783/6822/4952/4129/127/1581/8867/197257/8578/3633/66002/10858/6818
BP	GO:0072525	pyridine-containing compound biosynthetic process	23	0.589533	2.0076	0.00126625	0.0118927	0.00882685	4050	tags=48%, list=16%, signal=40%	8942/8564/10135/23475/55163/125061/65220/29968/4837/23498/130013
BP	GO:0031069	hair follicle morphogenesis	28	-0.552894	-1.91741	0.00126827	0.0118975	0.00883034	7962	tags=64%, list=32%, signal=44%	6469/10468/8399/4851/2255/25928/2252/342574/3872/7053/3488/2263/80326/7042/596/2736/94234/27152
CC	GO:0120114	Sm-like protein family complex	68	-0.417961	-1.76829	0.00127562	0.0119521	0.0088709	4951	tags=40%, list=20%, signal=32%	54960/83443/24148/10713/6637/50628/10946/9343/56257/51634/51691/6636/6628/6638/23450/57819/6626/51690/27258/6629/10569/10992/6633/153527/10421/8175/10465
BP	GO:0042182	ketone catabolic process	12	0.702321	1.95232	0.00128125	0.0119905	0.00889938	5151	tags=75%, list=20%, signal=60%	8942/57834/4051/64577/8630/3029/11315/66002/25953
BP	GO:0046777	protein autophosphorylation	210	-0.307425	-1.5398	0.00130236	0.0121735	0.0090352	5305	tags=34%, list=21%, signal=27%	805/2322/10494/9212/5753/5788/23178/3654/9262/6789/6790/25/5912/2241/56034/25989/5911/2011/5747/2041/2872/65268/11200/6793/1613/4921/23043/9833/10553/23400/7272/5154/9770/808/84206/2263/4067/5058/10155/1436/695/7016/5613/7301/9961/25865/6714/2049/10457/780/2022/6850/857/11040/2064/2869/11035/7070/11184/5595/3702/5156/3815/7424/7535/5155/27347/5587/5159/80310/2261
BP	GO:0090023	positive regulation of neutrophil chemotaxis	21	-0.604894	-1.94186	0.00130611	0.012194	0.00905041	3000	tags=43%, list=12%, signal=38%	3071/1906/5879/5880/972/6363/1236/4192/6366
CC	GO:0031674	I band	131	-0.350571	-1.65802	0.00131293	0.0122431	0.00908687	5450	tags=40%, list=22%, signal=32%	3753/2280/89/4703/9124/5142/6331/27063/2318/845/859/4660/9457/1674/3315/10273/3728/84033/2281/27295/80206/118461/274/287/9260/342527/3741/5058/1465/171024/91977/23022/226/114907/4634/29964/3880/5532/2274/64236/3270/10529/6253/6717/775/6513/288/81/10398/58529/91624/1410/2275
BP	GO:0043123	positive regulation of I-kappaB kinase/NF-kappaB signaling	173	-0.32048	-1.56559	0.00131716	0.0122533	0.00909447	3171	tags=25%, list=13%, signal=22%	10346/80833/6376/353376/22954/81603/57161/958/387/54106/7188/56674/7186/10616/64170/6284/55072/23636/389/84433/57153/10392/117854/84336/9516/11040/51246/54503/6737/1902/8717/51704/834/6275/9641/347734/3965/55504/5587/10537/972/6363/1236/6366
BP	GO:0032386	regulation of intracellular transport	281	-0.286581	-1.48519	0.00131691	0.0122533	0.00909447	5233	tags=32%, list=21%, signal=26%	51024/7040/54828/27113/10519/7134/51547/51715/3936/2810/8724/23435/51100/9777/51686/975/27429/3638/2931/2737/10411/11142/3265/51201/7295/3326/20/3728/5296/6672/29934/1409/128637/2010/392/4478/580/23400/2621/4133/84455/1459/3684/1601/55486/55737/9495/7514/5936/10155/3916/51614/10134/5569/55072/8898/4641/54543/3689/9270/6714/3429/6720/91319/302/347/8021/652/4131/284/10657/5580/4926/55612/288/30846/…
BP	GO:0003206	cardiac chamber morphogenesis	119	-0.348682	-1.62062	0.0013241	0.0123033	0.00913153	2694	tags=34%, list=11%, signal=30%	2280/6899/7040/7134/4889/7474/7157/57057/859/2931/5457/6586/653/657/23414/2263/9510/8321/4634/2296/7168/2274/652/650/2022/7042/10848/2535/79977/6659/182/4208/26508/6604/2294/9464/1909/9353/6909/58495
BP	GO:0036037	CD8-positive, alpha-beta T cell activation	24	-0.580601	-1.92963	0.00133057	0.0123487	0.00916527	3634	tags=46%, list=14%, signal=39%	8320/3071/944/2841/50856/3133/9760/864/26191/596/3105
BP	GO:0051250	negative regulation of lymphocyte activation	143	-0.335411	-1.6053	0.00133449	0.0123705	0.00918142	4719	tags=32%, list=19%, signal=26%	7128/3135/7292/384/84695/3559/2737/100507436/64092/8654/6441/3071/942/25807/1511/55024/4067/695/55824/11314/3958/7301/8764/57045/7805/864/26191/10457/652/7305/5585/79679/54900/2064/1493/2615/3635/135/301/3965/5777/27242/374403/3134/972/4192
CC	GO:0099572	postsynaptic specialization	307	-0.277712	-1.45586	0.00133939	0.0124012	0.00920424	4073	tags=24%, list=16%, signal=20%	2596/10097/5913/5025/8516/80758/2905/401190/51201/64130/22829/9419/5552/23043/28964/3751/55607/1821/2171/476/158866/10006/26052/55450/134/28988/9123/81831/55737/9495/150/4067/1627/9201/120/3631/6208/8898/85461/1949/6714/747/6232/4900/6132/4131/78999/6230/775/6804/10505/10486/6222/6175/6207/118/6136/1501/6156/6223/6188/64084/6169/23208/57689/1410/135/57555/53335/23623/11178/8440/22883
BP	GO:0060191	regulation of lipase activity	82	-0.382184	-1.67828	0.001352	0.0125032	0.00927995	4750	tags=39%, list=19%, signal=32%	3357/5724/25/338328/6622/5330/5031/3265/22925/344/942/5538/387/5997/553/2263/7376/2769/389/5125/1902/653145/6352/5322/301/3702/5156/3815/1909/5159/2261/6272
BP	GO:0002455	humoral immune response mediated by circulating immunoglobulin	47	0.45246	1.82847	0.00136309	0.0125761	0.00933402	2793	tags=43%, list=11%, signal=38%	731/727/735/729/2213/10747/325/732/721/720/1191/722/718/7124/715/3263/716/717/725/51279
BP	GO:0045936	negative regulation of phosphate metabolic process	363	-0.269121	-1.43493	0.00136223	0.0125761	0.00933402	5348	tags=31%, list=21%, signal=25%	2280/93649/805/624/89/7040/5341/5753/5788/91663/7529/10519/84062/7128/5783/2029/2810/5728/51548/7157/25/23435/859/1353/103/2629/2041/79706/6622/3315/11142/6879/161742/64092/2048/20/2281/28964/26524/3071/55872/8826/5154/79007/9770/1609/54541/55450/5997/808/3082/8655/867/245928/10106/5570/4067/11314/3958/7016/9647/9961/5569/7251/29108/23636/9270/2192/26191/3486/7345/26051/652/650/5585/581/284/2022/…
BP	GO:0071624	positive regulation of granulocyte chemotaxis	24	-0.579554	-1.92615	0.0013649	0.012578	0.00933543	3000	tags=42%, list=12%, signal=37%	3071/57402/1906/5879/5880/972/6363/1236/4192/6366
BP	GO:0006563	L-serine metabolic process	10	0.727168	1.89685	0.00136766	0.0125886	0.0093433	5926	tags=80%, list=24%, signal=61%	875/6470/29968/26227/256987/6472/63826/10955
BP	GO:0062125	regulation of mitochondrial gene expression	18	0.621645	1.97274	0.00139514	0.0128264	0.00951981	4069	tags=44%, list=16%, signal=37%	26995/5562/10102/22868/10128/6472/92170/79072
BP	GO:0033157	regulation of intracellular protein transport	186	-0.312777	-1.54506	0.00140654	0.0129161	0.00958637	5314	tags=36%, list=21%, signal=29%	665/51024/7040/54828/27113/10519/51547/51715/3936/2810/23435/51100/9777/51686/975/27429/3638/2931/2737/10411/11142/3265/51201/7295/3326/3728/5296/6672/2010/580/23400/2621/84455/1459/3684/55486/9495/7514/10155/51614/10134/5569/55072/4641/54543/3689/9270/3429/6720/91319/347/652/284/5580/55612/288/2064/54741/10055/3002/10541/3059/79778/161291/5587/5880/6844
CC	GO:0031253	cell projection membrane	307	-0.276938	-1.4518	0.00143966	0.0132048	0.00980064	3021	tags=22%, list=12%, signal=19%	10630/5149/582/1800/4478/1836/6337/84455/51474/387/6810/134/1212/90249/5152/10347/2821/9495/3685/5058/2768/3675/4641/8140/6714/747/7168/59272/54869/27241/55612/5879/10227/150696/1915/199/6558/1072/5335/768/2348/10109/5420/10159/26751/4642/7070/2191/6188/54587/109/57348/10044/8910/6523/135/54997/64078/358/51177/84168/374403/84958/79901/9181/57111/8842
BP	GO:1901029	negative regulation of mitochondrial outer membrane permeabilization involved in apoptotic signaling pathway	10	0.724722	1.89047	0.00144312	0.013221	0.00981266	2187	tags=50%, list=9%, signal=46%	2729/666/291/10449/3303
BP	GO:0044706	multi-multicellular organism process	198	-0.310043	-1.53582	0.00144798	0.01325	0.00983419	4567	tags=28%, list=18%, signal=23%	5724/6833/2697/116/5737/7351/150921/4318/8605/5066/340784/3678/952/64518/3488/5021/6863/5997/5914/5228/6019/150/1906/10155/81539/824/3675/5368/639/3074/2192/5764/8614/59272/7076/5125/780/53405/6513/596/7026/51738/2182/1307/3673/6696/7216/85360/397/3691/5270/3490/682/3965/54361/23641
BP	GO:0019932	second-messenger-mediated signaling	270	-0.284268	-1.46325	0.00146484	0.0133887	0.00993713	5373	tags=32%, list=21%, signal=25%	1012/805/89/51024/5341/3000/5788/5598/55784/10519/8600/3357/51555/5533/845/116/1524/5737/3640/5025/2044/2905/10411/643/2281/8654/118461/283455/1907/6403/287/55607/729230/4776/683/1609/100/808/50852/5152/23564/8877/1672/51643/1906/695/55273/27040/10134/7462/121665/6548/1193/10487/5532/2274/5443/3270/916/5150/6850/775/84174/29995/10486/1235/51196/1910/54209/10663/5335/8445/6444/5144/58529/5518/7852…
MF	GO:0098631	cell adhesion mediator activity	62	-0.414472	-1.71498	0.00148331	0.0135417	0.0100507	2463	tags=29%, list=10%, signal=26%	1266/8515/23022/3921/23114/6282/302/90952/961/152330/29091/3673/11117/83700/57689/91624/301/682
BP	GO:0010517	regulation of phospholipase activity	61	-0.433863	-1.78338	0.00148875	0.0135755	0.0100758	4750	tags=43%, list=19%, signal=35%	3357/5724/25/6622/5330/5031/3265/22925/344/942/5538/5997/553/2263/2769/1902/653145/6352/5322/301/3702/5156/3815/1909/5159/2261
BP	GO:0002702	positive regulation of production of molecular mediator of immune response	105	-0.365452	-1.67432	0.00149698	0.0136166	0.0101063	5225	tags=37%, list=21%, signal=30%	7040/5788/23529/59067/3135/7474/7292/23586/3596/975/4292/2048/567/7158/10666/114548/942/6504/958/6810/54106/2821/3133/7186/8764/7805/8140/26191/117854/54440/7293/3105/3098/940/10417/51704/3815/3134/972
BP	GO:0007043	cell-cell junction assembly	138	-0.33279	-1.59708	0.00149847	0.0136166	0.0101063	3615	tags=24%, list=14%, signal=21%	2701/1006/143098/2048/3728/91862/287/71/387/261734/1495/4641/389/90952/59272/5583/421/79977/857/402/125111/9073/1501/5175/8506/1009/83700/79778/1004/286676/5010/9071/1366
BP	GO:1901617	organic hydroxy compound biosynthetic process	212	0.287658	1.51506	0.00149659	0.0136166	0.0101063	6374	tags=40%, list=25%, signal=30%	1595/51422/338/5053/2643/5007/51360/5562/5825/84105/51706/6647/5860/3612/114880/8864/6770/55163/570/11160/10613/51302/116519/6342/1644/6716/80270/217/1719/1066/29968/7124/10998/10449/5805/6697/1582/3028/3158/3422/5092/1638/6718/5105/1576/5629/8912/23600/3293/114883/51151/5447/4047/11001/1497/1585/247/4948/3930/1581/55304/121278/335/9563/11315/10682/2247/134429/5106/10858/6591/8647/64768/3613/3156…
BP	GO:0032102	negative regulation of response to external stimulus	356	-0.271981	-1.44839	0.00150452	0.0136451	0.0101274	5631	tags=33%, list=22%, signal=26%	5925/3123/6405/9655/54437/585/10875/84166/9856/57680/8573/1588/2895/4940/5788/5598/65078/10906/116443/4057/10371/89790/4889/11005/7128/3135/7474/5728/6833/3428/9037/9723/384/5654/5734/3596/3821/103/7869/2629/56920/3559/583/10500/79102/10203/79148/100507436/56339/4277/28964/6376/55872/313/114548/5154/6347/100/7103/134/3082/2841/5740/55737/245928/3133/55558/4067/1906/7376/79890/7301/5328/9636/58189…
BP	GO:0072657	protein localization to membrane	492	-0.25351	-1.39119	0.00150509	0.0136451	0.0101274	5666	tags=31%, list=23%, signal=24%	5727/8943/8878/26517/10966/375323/10551/3753/26225/10266/11187/83597/5872/10211/51024/7040/27113/91663/353116/10519/26520/25921/10981/5028/84062/81619/6730/23471/23480/598/51100/859/9777/5865/22844/9379/25813/60/5911/975/115827/254359/5913/583/92359/1741/6727/2905/55204/653361/5284/26519/1804/3265/51201/64130/55048/8546/2048/9419/23682/23241/3728/6745/483/3676/23043/3683/51735/582/10098/287/51762…
BP	GO:0033630	positive regulation of cell adhesion mediated by integrin	20	-0.606963	-1.92771	0.00150834	0.0136588	0.0101376	1335	tags=55%, list=5%, signal=52%	10519/3976/3071/916/6850/55612/7042/6352/5420/5777/6366
BP	GO:0038084	vascular endothelial growth factor signaling pathway	39	-0.497907	-1.85353	0.00151406	0.0136947	0.0101643	3717	tags=46%, list=15%, signal=39%	3315/2549/7423/3592/5228/147372/4641/25865/2296/11156/5293/64094/5156/7424/5587/5159/1634/967
BP	GO:0048730	epidermis morphogenesis	32	-0.535906	-1.89709	0.00152239	0.0137162	0.0101802	7962	tags=59%, list=32%, signal=41%	6469/10468/8399/4851/2255/8985/25928/2252/342574/3872/7053/3488/2263/80326/7042/596/2736/94234/27152
BP	GO:0042363	fat-soluble vitamin catabolic process	13	0.669601	1.88272	0.00152477	0.0137162	0.0101802	5626	tags=69%, list=22%, signal=54%	57834/1592/4051/1381/1576/1591/340665/66002/54905
BP	GO:0009437	carnitine metabolic process	13	0.669227	1.88167	0.00152477	0.0137162	0.0101802	5000	tags=69%, list=20%, signal=56%	34/55217/33/8424/5447/54677/1384/1374/223
BP	GO:0030838	positive regulation of actin filament polymerization	43	-0.473976	-1.81449	0.00152519	0.0137162	0.0101802	4731	tags=42%, list=19%, signal=34%	9873/2241/10602/6369/80115/274/3071/387/5216/29108/51466/10344/10109/148170/23580/8440/1236/6366
BP	GO:0002703	regulation of leukocyte mediated immunity	216	-0.299449	-1.51004	0.00152324	0.0137162	0.0101802	4458	tags=32%, list=18%, signal=27%	7292/2241/1524/23586/3596/3821/911/3125/2208/975/4292/684/7098/100507436/6688/567/7158/10666/3071/1178/3592/729230/114548/910/3594/6504/3684/958/6810/3140/909/3133/6812/7186/4067/695/11314/3916/9437/10125/3689/913/6813/5532/7305/7454/6850/9466/54440/4049/8673/3136/114836/54209/3105/940/11035/6372/3122/10225/4068/3106/3965/2294/3815/5777/5880/3134/3575
BP	GO:0001933	negative regulation of protein phosphorylation	288	-0.280281	-1.45739	0.00155005	0.0139238	0.0103343	6459	tags=38%, list=26%, signal=28%	868/104/56940/5621/22943/1843/22933/57493/4091/409/6690/153090/10464/10959/140885/5794/6422/4908/5925/9655/93649/805/624/7040/5753/5788/91663/10519/84062/7128/5783/2810/5728/25/23435/859/103/2629/2041/79706/6622/3315/11142/6879/161742/64092/2048/26524/55872/79007/9770/1609/54541/55450/5997/808/3082/867/245928/10106/5570/4067/11314/7016/9647/9961/5569/7251/29108/23636/9270/2192/26191/3486/7345/652…
MF	GO:0008392	arachidonic acid epoxygenase activity	16	0.627932	1.91977	0.00155912	0.0139893	0.0103829	7322	tags=81%, list=29%, signal=58%	1573/1557/1562/1579/1558/1572/1555/1571/1559/66002/199974/1553/8529
CC	GO:0030133	transport vesicle	362	-0.264011	-1.40813	0.00160044	0.0143436	0.0106459	5677	tags=33%, list=23%, signal=26%	4908/84079/3123/79772/89866/10618/10966/966/5866/321/2550/22818/5872/160/55784/5142/9367/84062/3118/7054/90019/114569/4803/858/3135/3117/10016/6833/25844/598/5865/6645/1314/6536/3125/8677/115827/3120/80023/6622/3382/1211/54732/5066/3119/192683/567/1621/762/274/5799/9182/11037/440279/7039/51399/4135/10755/5869/7466/23400/5538/51762/81615/6810/6843/6856/4074/808/1212/9900/3133/8766/6616/1906/3916/5…
BP	GO:0006829	zinc ion transport	28	0.537247	1.91354	0.00160287	0.0143489	0.0106498	6244	tags=57%, list=25%, signal=43%	7779/6505/23516/7781/64924/55630/221074/7782/55532/55334/283375/7922/29986/91252/55676/64116
BP	GO:0006778	porphyrin-containing compound metabolic process	48	0.447445	1.82381	0.00160896	0.014387	0.0106781	7171	tags=62%, list=29%, signal=45%	2395/645/1544/1244/22/113235/4891/1543/211/3145/28234/3263/8803/51629/10599/259/54657/210/81853/10857/2235/23456/11309/402055/28978/7389/3162/7390/54977/3163
BP	GO:0030889	negative regulation of B cell proliferation	17	-0.627062	-1.87382	0.00161433	0.0144185	0.0107015	2111	tags=47%, list=8%, signal=43%	4067/695/11314/7305/5585/1493/3635/27242
BP	GO:0019373	epoxygenase P450 pathway	18	0.617283	1.9589	0.00162291	0.0144787	0.0107461	4989	tags=67%, list=20%, signal=53%	1544/1573/1557/1562/1543/1579/1558/1572/1555/1571/1559/66002
BP	GO:0022408	negative regulation of cell-cell adhesion	169	-0.321731	-1.56768	0.00162765	0.0145044	0.0107652	1986	tags=21%, list=8%, signal=20%	55824/11314/3958/9647/8764/57045/7805/864/26191/80709/10457/652/650/79679/54900/5580/6387/114897/2064/182/1493/56477/23075/5420/2615/5270/135/301/3965/53827/5777/27242/972/10653/4192/6366
BP	GO:0006699	bile acid biosynthetic process	34	0.510974	1.90737	0.00164426	0.0146358	0.0108628	5366	tags=62%, list=21%, signal=49%	5007/5825/114880/6770/570/51302/6342/80270/1066/10998/1582/3028/6718/5629/23600/114883/11001/1581/134429/10858/8647
CC	GO:0070821	tertiary granule membrane	64	-0.410828	-1.7196	0.00167065	0.0148538	0.0110246	5500	tags=47%, list=22%, signal=37%	966/84443/23218/2207/138050/8972/3687/81619/5724/5912/170482/101/4973/6515/3684/6843/8655/22918/6616/11322/79895/11314/5328/3689/5269/961/8673/1535/10159/963
CC	GO:0045178	basal part of cell	251	-0.288481	-1.47143	0.00169526	0.0150555	0.0111743	4194	tags=29%, list=17%, signal=24%	6536/975/338328/6814/1741/23539/6510/5031/64130/146894/3326/53919/483/952/10057/10630/3680/7039/287/4478/89845/476/6810/134/54106/9123/9056/150/1906/4486/81539/9057/525/3675/9497/4641/8140/254428/6548/302/10392/3177/10163/10257/6513/85409/150696/288/2064/4070/6558/3673/23187/9073/768/9843/2348/4642/6768/2191/3691/301/682/846/358/5155/27347/3773/376497/5010/770/947/1366
BP	GO:0070613	regulation of protein processing	54	-0.434761	-1.73759	0.00170744	0.0151392	0.0112364	3140	tags=35%, list=12%, signal=31%	29934/26022/4627/8996/147372/2934/9528/6714/302/199713/79094/2734/85409/10418/6281/8530/51098/5270/2619
BP	GO:0002824	positive regulation of adaptive immune response based on somatic recombination of immune receptors built from immunoglobulin superfamily domains	99	-0.362548	-1.63536	0.00170855	0.0151392	0.0112364	5866	tags=45%, list=23%, signal=35%	51561/7784/91543/3123/338322/7040/5788/23529/3135/7292/911/3125/2208/975/4292/8767/567/7158/10666/3592/729230/114548/910/3594/6504/100/958/3140/909/3133/7186/695/64170/913/9466/54440/4049/3136/54209/3105/940/3122/3106/3134/10673
BP	GO:0001706	endoderm formation	53	-0.433094	-1.72966	0.00173171	0.0153271	0.0113759	4463	tags=36%, list=18%, signal=30%	57057/4318/1295/64321/3693/8320/3678/3676/5460/3281/3909/3685/3689/1303/1290/1291/1289/1284/3912
BP	GO:1900424	regulation of defense response to bacterium	18	-0.618144	-1.87351	0.00173998	0.0153656	0.0114044	685	tags=50%, list=3%, signal=49%	22933/338322/11005/384/1535/84034/11117/23208/2896
BP	GO:0042254	ribosome biogenesis	231	0.28309	1.49499	0.00173877	0.0153656	0.0114044	5963	tags=38%, list=24%, signal=29%	55272/64216/57418/4927/64794/6059/8451/54663/2752/25926/23404/23160/51068/8780/84128/10885/10199/10557/90441/54505/51202/23246/9188/65083/55003/57647/23076/55341/56342/57050/153443/22868/79954/705/1654/10438/10775/134430/79039/2971/10171/55781/23212/23560/92856/10607/79707/81875/9221/55027/54512/11056/5591/6134/23223/51010/118460/51367/25983/54606/51441/11103/55813/8450/9092/54865/29093/84946/979…
CC	GO:0030018	Z disc	121	-0.353663	-1.64834	0.00176759	0.0155918	0.0115723	5450	tags=40%, list=22%, signal=32%	3753/2280/89/4703/9124/5142/6331/2318/845/859/4660/9457/1674/3315/10273/3728/84033/2281/27295/80206/118461/274/287/9260/3741/5058/1465/171024/91977/23022/114907/29964/3880/5532/2274/64236/3270/10529/6253/6717/775/6513/288/81/10398/58529/91624/1410/2275
CC	GO:0030017	sarcomere	195	-0.298578	-1.48066	0.00177123	0.0156063	0.0115831	5450	tags=33%, list=22%, signal=26%	3753/2280/805/89/4703/7134/9124/5142/6331/27063/2318/845/859/4660/9457/1674/3315/10273/3728/84033/2281/27295/80206/118461/274/287/22954/23345/9260/3611/342527/808/343263/3741/5058/1465/171024/91977/23022/226/114907/4634/29964/3880/7168/5532/2274/64236/3270/10529/6253/6717/775/7136/6513/288/7171/4622/81/10398/58529/7169/91624/1410/2275
BP	GO:0051017	actin filament bundle assembly	140	-0.330261	-1.58205	0.00179148	0.0157494	0.0116893	3857	tags=35%, list=15%, signal=30%	10174/25/5734/7791/4739/79822/2041/10411/3693/80115/6376/2006/51474/71/387/221692/22899/5058/171024/7016/9647/253980/5216/9270/389/6548/6714/7168/57175/3925/51466/7454/23370/10163/5879/961/10083/118/199/6281/4070/1902/29109/23075/9639/1809/64780/54361/4082
BP	GO:0061572	actin filament bundle organization	140	-0.330261	-1.58205	0.00179148	0.0157494	0.0116893	3857	tags=35%, list=15%, signal=30%	10174/25/5734/7791/4739/79822/2041/10411/3693/80115/6376/2006/51474/71/387/221692/22899/5058/171024/7016/9647/253980/5216/9270/389/6548/6714/7168/57175/3925/51466/7454/23370/10163/5879/961/10083/118/199/6281/4070/1902/29109/23075/9639/1809/64780/54361/4082
BP	GO:0016525	negative regulation of angiogenesis	85	-0.383924	-1.69127	0.00179733	0.0157831	0.0117143	4737	tags=36%, list=19%, signal=30%	11005/2828/3135/6833/7075/9723/22905/161742/729230/3339/5797/22846/9510/23213/3202/2296/1285/7058/10365/7042/51738/55810/6558/3627/64218/1284/1870/11117/6772/1634/6678
BP	GO:0014066	regulation of phosphatidylinositol 3-kinase signaling	98	-0.370301	-1.67213	0.00180435	0.015827	0.0117468	2929	tags=30%, list=12%, signal=26%	6403/5154/3082/867/10125/8678/6714/26051/4920/284/7042/10870/54209/25827/6352/10507/940/3059/5270/219699/6662/5156/3815/5777/5155/5159/80310/1634/113791
BP	GO:0001916	positive regulation of T cell mediated cytotoxicity	28	-0.543723	-1.88561	0.00181602	0.0159115	0.0118096	5866	tags=64%, list=23%, signal=49%	51561/3123/5788/3135/911/567/3592/910/3594/3140/909/3133/913/3136/3105/3122/3106/3134
BP	GO:0032388	positive regulation of intracellular transport	164	-0.311954	-1.51008	0.00182457	0.0159686	0.011852	4398	tags=30%, list=17%, signal=25%	23435/51100/9777/51686/975/27429/2931/2737/10411/3265/51201/3326/3728/5296/128637/2010/4478/2621/4133/84455/1459/3684/1601/9495/10155/51614/10134/55072/8898/4641/54543/3689/9270/302/10657/5580/4926/288/30846/2064/54741/10055/3002/10541/3059/79778/161291/5587/5880/6844
MF	GO:0019199	transmembrane receptor protein kinase activity	77	-0.391439	-1.7074	0.00182972	0.0159957	0.0118721	3938	tags=34%, list=16%, signal=29%	2044/285220/2041/2048/4921/5157/51232/657/2263/1436/4486/7301/1949/2049/4920/780/2022/2202/2064/2042/5156/3815/8425/5159/2261/2051
MF	GO:0008970	phospholipase A1 activity	11	0.67943	1.82826	0.00183548	0.0160183	0.0118889	4680	tags=64%, list=19%, signal=52%	50640/255189/3990/9388/51365/283748/171586
BP	GO:0017015	regulation of transforming growth factor beta receptor signaling pathway	114	-0.348832	-1.60776	0.00183639	0.0160183	0.0118889	5348	tags=36%, list=21%, signal=28%	2280/93649/7040/94031/283149/51341/25805/858/7157/859/9839/5654/8516/161742/10273/3326/26524/124857/10755/255743/4435/1601/79674/3675/114990/5300/650/2734/2022/55612/10252/857/2348/11117/65997/56937/27122/1028/8425/9719/7041
BP	GO:0048662	negative regulation of smooth muscle cell proliferation	49	-0.457408	-1.80465	0.00185269	0.0161425	0.011981	3253	tags=41%, list=13%, signal=36%	93649/1264/7128/5728/5739/3592/3488/8862/387/4883/2768/3486/7168/347/650/59272/3600/199/4208/30008
BP	GO:0014065	phosphatidylinositol 3-kinase signaling	128	-0.347173	-1.64268	0.00186959	0.0162536	0.0120635	3875	tags=31%, list=15%, signal=27%	5747/25948/653361/4150/5296/6403/375033/5154/3082/867/1906/7301/10125/8678/6714/26051/5293/4920/284/7042/10870/2064/54209/25827/6352/10507/940/3059/5270/219699/5294/6662/5156/3815/5777/5155/5159/80310/1634/113791
BP	GO:0003205	cardiac chamber development	155	-0.323331	-1.5644	0.00186959	0.0162536	0.0120635	5348	tags=32%, list=21%, signal=26%	2280/93649/6899/7040/7134/5754/4889/6331/7474/7157/57057/859/23129/2931/9782/5457/9784/6586/287/653/657/7798/23414/2263/9510/8321/639/4634/2296/7168/2274/652/650/2022/7042/10848/2535/79977/6659/182/8543/4208/26508/6604/2294/9464/1909/9353/6909/58495
BP	GO:0007346	regulation of mitotic cell cycle	398	-0.259787	-1.40316	0.00188229	0.0163459	0.012132	6527	tags=35%, list=26%, signal=27%	1022/135458/675/56475/51514/54443/9088/10385/835/1843/219736/23236/22933/6240/4762/2255/9525/5641/11170/4582/7480/5727/63967/5925/11331/26574/85417/10296/1163/286053/699/7508/6241/1062/9212/2290/1063/55198/858/55159/5728/7157/6419/55835/9032/10419/6790/25/328/65123/57504/51065/55920/284403/84861/51379/56984/11200/81620/1613/56257/7976/55023/7517/10197/7039/8826/7756/10201/11065/7272/11130/3364/93…
MF	GO:0004714	transmembrane receptor protein tyrosine kinase activity	60	-0.426138	-1.74831	0.00189637	0.0164499	0.0122092	3938	tags=38%, list=16%, signal=32%	2044/285220/2041/2048/4921/5157/51232/2263/1436/4486/7301/1949/2049/4920/780/2202/2064/2042/5156/3815/5159/2261/2051
BP	GO:0072132	mesenchyme morphogenesis	52	-0.443434	-1.76879	0.00189881	0.0164529	0.0122114	2694	tags=29%, list=11%, signal=26%	653/657/59/55273/140628/2296/650/2022/7042/4487/26508/2294/6662/6909/51176
CC	GO:0016328	lateral plasma membrane	61	-0.427543	-1.75741	0.00191029	0.0165202	0.0122614	4762	tags=41%, list=19%, signal=33%	6331/2697/6536/2011/143098/29899/3728/7976/8826/476/9123/2768/1856/525/4641/4926/85409/288/402/4070/6558/57216/5518/301/114902
BP	GO:0001666	response to hypoxia	254	-0.291771	-1.48899	0.0019108	0.0165202	0.0122614	3578	tags=24%, list=14%, signal=21%	5066/7423/10273/890/4524/952/10397/3751/139341/1788/5154/57085/100/387/54541/2071/7515/134/8996/5228/3741/5740/4352/1906/212/824/5328/8678/114990/6548/126374/6714/8614/5300/650/8751/6513/3779/4049/7042/596/4929/6387/857/9915/54209/3673/768/81/1535/1410/7852/846/1909/7424/358/100133941/6649/947/5327/114757
BP	GO:0071577	zinc ion transmembrane transport	24	0.548064	1.88485	0.00192959	0.0166093	0.0123275	6244	tags=62%, list=25%, signal=47%	7779/6505/23516/7781/64924/55630/221074/7782/55532/283375/7922/29986/91252/55676/64116
MF	GO:0004812	aminoacyl-tRNA ligase activity	22	0.562816	1.87709	0.00192851	0.0166093	0.0123275	6293	tags=59%, list=25%, signal=44%	57176/124454/79731/55157/57505/55699/2193/80222/10056/92935/80755/23395/79587
BP	GO:0006418	tRNA aminoacylation for protein translation	22	0.562816	1.87709	0.00192851	0.0166093	0.0123275	6293	tags=59%, list=25%, signal=44%	57176/124454/79731/55157/57505/55699/2193/80222/10056/92935/80755/23395/79587
MF	GO:0016875	ligase activity, forming carbon-oxygen bonds	22	0.562816	1.87709	0.00192851	0.0166093	0.0123275	6293	tags=59%, list=25%, signal=44%	57176/124454/79731/55157/57505/55699/2193/80222/10056/92935/80755/23395/79587
CC	GO:0001527	microfibril	12	-0.697971	-1.876	0.00193498	0.0166375	0.0123484	347	tags=42%, list=1%, signal=41%	4237/339366/8425/30008/4239
BP	GO:0098754	detoxification	121	0.334263	1.61856	0.00194238	0.0166644	0.0123684	3066	tags=27%, list=12%, signal=24%	7779/4489/10587/2643/4499/4501/4493/4495/94241/4496/948/6647/2745/2936/2954/4494/847/540/9588/2176/55244/9429/4257/7001/1719/4490/128/5292/4502/55532/25824/29914/10935
BP	GO:0044106	cellular amine metabolic process	104	0.341902	1.59668	0.00194238	0.0166644	0.0123684	5392	tags=38%, list=21%, signal=30%	6999/8942/29958/5053/2643/6505/18/501/8564/6581/196743/2639/1814/6799/125061/1644/217/79814/4837/314/15/6817/445329/23498/262/4128/222236/27284/3176/4129/130013/3251/2903/11315/6620/6818/25953/2034/51582
BP	GO:0045684	positive regulation of epidermis development	24	-0.569631	-1.89317	0.00194964	0.0167085	0.0124011	1642	tags=42%, list=7%, signal=39%	5727/2810/474/2296/652/5583/4926/6820/2118/58495
BP	GO:0007585	respiratory gaseous exchange by respiratory system	65	-0.411558	-1.72477	0.00195283	0.0167175	0.0124078	3751	tags=32%, list=15%, signal=28%	30012/8546/6441/2006/10800/7534/25809/55967/134/147372/1906/3202/5090/2744/57616/3714/4929/2530/57555/1909/4692
BP	GO:0030858	positive regulation of epithelial cell differentiation	50	-0.45146	-1.78822	0.00196838	0.0168322	0.012493	6647	tags=50%, list=26%, signal=37%	2302/8456/7849/572/94/7480/5727/5991/3976/2810/474/3596/7716/694/55273/2296/652/5583/4926/6820/6662/2118/100133941/58495/8842
BP	GO:0030323	respiratory tube development	168	-0.307143	-1.49688	0.00198602	0.0169645	0.0125911	3096	tags=24%, list=12%, signal=21%	1907/6441/10630/3488/2254/5154/7534/21/100/9620/657/23414/147372/2263/7289/3202/284217/3675/6720/7067/652/10365/5125/9509/4048/2736/83716/10252/79977/1281/84525/2719/5595/2294/6662/5156/6909/6943/5159/9719
BP	GO:0035590	purinergic nucleotide receptor signaling pathway	31	-0.524485	-1.84544	0.00200437	0.017084	0.0126798	5695	tags=52%, list=23%, signal=40%	5026/5023/5028/5724/5025/5031/2857/100/134/9934/1511/111/27334/135/2771/286530
BP	GO:0071806	protein transmembrane transport	55	0.422824	1.76173	0.00200422	0.017084	0.0126798	4081	tags=36%, list=16%, signal=31%	83752/9697/6729/3329/19/9131/5194/563/131118/80273/10469/7095/4170/5189/134266/55176/5830/131474/100287932/3309
BP	GO:0045730	respiratory burst	32	-0.529566	-1.87465	0.00201172	0.0171281	0.0127125	4330	tags=47%, list=17%, signal=39%	654817/10811/653361/4688/56833/5293/5879/54209/1535/6223/1043/2896/5294/5880/100133941
CC	GO:0010494	cytoplasmic stress granule	65	0.396077	1.71896	0.00202715	0.0172407	0.0127961	4351	tags=35%, list=17%, signal=29%	10146/113251/6780/57532/1981/7073/170506/1965/253943/9908/11269/7415/54915/23369/79752/55308/1654/27067/1977/1656/5042/51441/6093
BP	GO:0023035	CD40 signaling pathway	15	-0.647024	-1.86363	0.00202976	0.0172442	0.0127987	6179	tags=73%, list=25%, signal=55%	3688/11331/7128/3678/942/6504/958/959/55072/2177/54209
BP	GO:0070482	response to oxygen levels	288	-0.27785	-1.44475	0.00204257	0.0173342	0.0128655	3578	tags=24%, list=14%, signal=20%	5066/7423/10273/890/4524/952/10397/3751/10630/139341/1788/5021/5154/57085/100/387/54541/2071/7515/134/8996/5228/3741/5740/867/4352/1906/212/824/5328/8678/114990/6548/126374/6714/84317/8614/5300/650/1277/8751/6513/3779/4049/7042/596/537/4929/6387/857/9915/54209/3673/768/81/1535/1410/7852/846/1909/7424/358/5159/100133941/6649/947/5327/114757
BP	GO:0042692	muscle cell differentiation	319	-0.265802	-1.39908	0.00205219	0.0173969	0.0129121	5310	tags=29%, list=21%, signal=23%	93649/6899/89/10211/7040/4703/7248/25842/93166/90342/858/27063/2318/8324/859/81029/4629/150921/5738/975/2314/50507/5915/8516/2931/607/58494/84033/5999/80206/274/287/124857/22954/23345/4776/3488/2254/4627/255743/71/6443/657/5997/5914/2263/1465/5936/1906/824/150572/85461/6548/7345/3880/7168/2274/652/650/10529/2022/596/2539/25776/4283/4487/30846/1910/3627/84525/81/6444/3792/10398/4208/58529/8506/338…
CC	GO:0030176	integral component of endoplasmic reticulum membrane	129	-0.332043	-1.56943	0.00205909	0.0174366	0.0129415	4800	tags=37%, list=19%, signal=30%	3118/3135/3117/23471/64834/79993/54344/128869/3125/6891/662/26580/3120/3638/54499/3119/54020/54872/567/10170/7466/126129/9986/6785/11153/3133/51614/10134/121665/23457/91319/6319/6892/6253/6890/94005/3136/3105/6252/819/3113/3122/347734/3115/3106/3134/51604/972
BP	GO:0002705	positive regulation of leukocyte mediated immunity	122	-0.341569	-1.59372	0.00206316	0.0174522	0.0129531	5949	tags=43%, list=24%, signal=33%	3822/51561/7784/91543/3123/7409/7040/5788/23529/59067/3135/5724/7292/23586/911/3125/2208/975/4292/6688/567/7158/10666/3592/114548/910/3594/6504/3684/958/6810/3140/909/3133/7186/695/3916/10125/3689/913/7305/54440/4049/3136/114836/54209/3105/940/3122/4068/3106/3815/3134
BP	GO:0046885	regulation of hormone biosynthetic process	22	-0.558969	-1.83353	0.00206796	0.0174739	0.0129692	2694	tags=41%, list=11%, signal=37%	653/476/1609/1601/8614/650/2672/27122/54361
BP	GO:0048754	branching morphogenesis of an epithelial tube	146	-0.327739	-1.5769	0.00207561	0.0175197	0.0130032	4662	tags=31%, list=19%, signal=25%	7474/51548/7075/6789/9723/57057/7484/5314/25/859/23129/5499/2737/1512/4776/3611/255743/4435/9620/2263/5058/1906/3202/284217/6714/652/650/780/2022/1282/596/2736/10252/4070/2719/2294/6662/846/1909/9353/6909/54361/6943/51176/4192
BP	GO:2000177	regulation of neural precursor cell proliferation	78	-0.397094	-1.73197	0.00210357	0.0177366	0.0131642	5056	tags=40%, list=20%, signal=32%	2624/2290/55198/7474/7157/23440/1524/259266/2737/284403/7976/6376/644943/3611/387/79801/4067/9760/1495/9355/7832/5764/4673/6692/10763/6604/2771/57165/7424/10653/4192
BP	GO:0051348	negative regulation of transferase activity	230	-0.285866	-1.45265	0.00210801	0.0177549	0.0131777	4811	tags=30%, list=19%, signal=24%	84062/7128/2810/5728/7157/25/859/1353/103/2629/2931/2041/6201/79706/6622/3315/11142/6879/6135/161742/2048/26524/79007/6224/55450/5997/991/867/245928/5570/4067/11314/7016/9647/9961/5569/7251/29108/80119/6209/23636/9184/9270/29085/1974/26191/7345/6714/652/650/5585/54900/5580/1031/2167/10252/7026/857/25937/28951/55861/1029/7070/135/1028/5777/2950/113791
BP	GO:0006536	glutamate metabolic process	32	0.520068	1.91328	0.00211686	0.0178103	0.0132189	1445	tags=31%, list=6%, signal=29%	2729/7915/51166/2752/58510/10588/10841/2746/2806/8659
BP	GO:0002367	cytokine production involved in immune response	94	-0.365969	-1.63547	0.00212865	0.0178903	0.0132782	4673	tags=33%, list=19%, signal=27%	3135/7474/7292/23586/975/684/7098/567/10666/1178/729230/114548/6504/3133/7186/695/8764/7805/8140/117854/284/54440/7042/3105/3098/10417/51704/10225/3815/3134/972
BP	GO:0046700	heterocycle catabolic process	376	0.251081	1.4077	0.00214434	0.0180028	0.0133618	7298	tags=40%, list=29%, signal=29%	6999/8942/1763/23405/1776/79882/5167/8564/22849/6832/23034/9131/1432/23708/170506/645/1806/38/5151/201626/10924/60528/4329/5446/23404/10605/1244/26135/10588/87178/23475/4913/5073/1807/29974/54888/22978/2926/253943/200424/125061/5169/10840/8148/7415/54915/1543/51071/27327/57026/10179/10492/23369/22868/3303/28234/340719/677/1618/8570/124245/23049/9567/11163/2935/55270/10128/1773/8559/54512/115752/2…
MF	GO:0008186	ATP-dependent activity, acting on RNA	70	0.396903	1.74362	0.00215905	0.0181069	0.013439	6721	tags=46%, list=27%, signal=34%	10146/6832/64794/170506/83990/56919/54505/51202/9188/57647/11269/60625/3508/55308/1654/79039/25788/11056/1656/6499/54606/64848/1662/57696/9704/1659/1660/55794/168400/1665/5976/54555
BP	GO:0090407	organophosphate biosynthetic process	453	0.233817	1.33917	0.00217841	0.0182497	0.013545	5192	tags=28%, list=21%, signal=23%	8942/22908/259230/9218/51703/55151/51422/132/2643/5631/441024/55300/55312/221823/51099/285172/5007/2180/8564/4522/5283/5164/166929/10135/284098/4337/38/79646/2981/5288/8776/3612/3931/2618/145567/2639/79575/1723/53354/10165/23475/55163/5471/32/80347/5465/6470/3358/125061/10351/10891/1373/203/65220/1154/9306/5198/7415/9626/30849/256987/3158/4833/3422/55022/4837/5313/55500/8835/1607/204962/107/12280…
BP	GO:0000226	microtubule cytoskeleton organization	480	-0.246456	-1.35017	0.00219028	0.0183295	0.0136043	5296	tags=28%, list=21%, signal=22%	112714/246176/11004/1062/54828/9212/10519/29911/85458/256714/81930/55137/7278/84617/51510/9126/89796/55036/85478/3833/55835/2697/6790/5314/25/2241/859/79739/3832/22995/2009/8045/1070/583/4292/259266/136332/2011/284403/29127/6622/57405/11200/3619/9419/29899/11104/90990/51199/28964/114327/26112/7517/2622/7756/4135/89765/388389/644890/11186/10300/55812/7272/84552/4627/9696/9662/9133/4133/84790/10112…
MF	GO:0046915	transition metal ion transmembrane transporter activity	37	0.479706	1.83954	0.0021927	0.0183302	0.0136048	5680	tags=51%, list=23%, signal=40%	7779/23516/57130/540/4891/7781/64924/55630/1317/221074/7782/51312/55532/283375/7922/29986/27032/91252/55676
BP	GO:0001954	positive regulation of cell-matrix adhesion	53	-0.429594	-1.71569	0.00220246	0.0183922	0.0136507	5870	tags=49%, list=23%, signal=38%	6422/4680/1012/1021/7248/10519/59339/25/2041/3728/6376/9647/54453/9270/916/55612/5879/6281/1307/56477/7070/54361/30008/6237/1236/6366
BP	GO:0051302	regulation of cell division	162	-0.323968	-1.56744	0.00220939	0.0184304	0.0136791	5666	tags=39%, list=23%, signal=30%	5727/2252/28514/585/805/7040/9212/10519/84440/3357/2810/1810/6790/7484/598/51100/56034/84432/259266/55958/29127/64321/7423/643/10628/28964/114327/5460/7039/79848/10755/2254/5154/23503/10112/9493/387/7564/10263/808/5228/7405/2263/8766/8556/8678/23636/9270/5764/9055/5300/1069/641/7042/56241/81606/2124/10733/7424/27152/5155/80310/4192
BP	GO:0035810	positive regulation of urine volume	12	-0.693199	-1.86318	0.00221901	0.018491	0.0137241	2455	tags=42%, list=10%, signal=38%	4883/1906/1910/135/2771
BP	GO:0006607	NLS-bearing protein import into nucleus	15	0.628312	1.86608	0.00224575	0.0186939	0.0138747	5355	tags=53%, list=21%, signal=42%	3836/129401/3839/23633/3838/729857/53371/5903
BP	GO:0015918	sterol transport	82	0.360416	1.62731	0.00225502	0.0187512	0.0139172	4988	tags=41%, list=20%, signal=33%	1071/114885/9218/338/255738/10802/5007/19/948/114880/3931/3990/6770/9388/1191/116519/10351/6342/219931/1066/1582/4547/3949/5045/4040/114883/54762/114882/23461/4035/335/8435/64240/134429
BP	GO:0045088	regulation of innate immune response	207	-0.303473	-1.5176	0.00225903	0.0187646	0.0139271	6188	tags=36%, list=25%, signal=28%	409/60343/26065/57169/3822/9111/2534/7804/9683/7409/9447/84166/4940/59067/10906/2219/55198/7128/3135/7474/3428/11140/51311/3821/103/101/653361/90933/100507436/9782/3326/6688/56339/10666/3592/3133/4067/5058/81030/4841/7376/3916/64170/7301/9437/10125/9636/29108/26191/6714/1690/56833/7305/149628/117854/6850/115362/3430/114836/54209/6737/3105/6352/6223/5322/8815/10225/4068/2896/9641/3106/3148/3965/57…
MF	GO:0016597	amino acid binding	49	0.441454	1.79547	0.00227263	0.0188376	0.0139813	7162	tags=55%, list=28%, signal=39%	6999/2729/6505/2752/23569/2746/51540/6470/1373/1644/2644/57505/2917/6472/23576/189/2731/2741/143686/197131/63826/4846/445/27232/4842/2747/8001
BP	GO:0045667	regulation of osteoblast differentiation	111	-0.352911	-1.62254	0.00227199	0.0188376	0.0139813	3875	tags=32%, list=15%, signal=27%	5747/2737/10140/860/4921/3488/3199/9260/3611/115908/9770/255743/4435/51232/657/3082/8313/2263/10312/57045/652/650/8519/182/25937/10507/3399/4208/338773/6662/9464/7424/54361/5587/1192
BP	GO:0035924	cellular response to vascular endothelial growth factor stimulus	58	-0.4225	-1.72922	0.00229079	0.018968	0.0140781	3717	tags=40%, list=15%, signal=34%	3315/2549/7423/3592/5228/8877/147372/3164/4641/25865/2296/9270/11156/5293/64094/2619/301/5156/7424/5587/5159/1634/967
BP	GO:0034446	substrate adhesion-dependent cell spreading	100	-0.368569	-1.66432	0.0022953	0.0189704	0.0140799	4412	tags=38%, list=18%, signal=31%	8324/25/2241/8516/5747/4739/55920/2041/64098/3676/10630/57580/3611/387/1601/3685/83706/9404/7016/7301/3695/9270/2192/6714/2049/3915/5879/6281/4070/11078/81/10109/3912/79778/84168/9341/10319/4192
BP	GO:0048562	embryonic organ morphogenesis	277	-0.278166	-1.43449	0.00229592	0.0189704	0.0140799	5056	tags=27%, list=20%, signal=22%	2624/2290/257/1749/5754/7054/7474/474/55036/25902/2697/2295/8820/57057/7484/55212/5396/5915/3214/8516/121227/3638/2737/860/64321/55081/340784/2048/3213/55084/7976/4237/388389/3199/2254/115908/2263/1906/7289/3202/1856/525/3201/8463/3221/3215/652/26160/4920/2022/9742/2535/2202/10083/79977/4487/9775/11078/54345/2348/4208/51098/6169/2487/57216/5595/3212/2294/6662/5156/9464/1909/7703/6909/6943/58495
BP	GO:0006090	pyruvate metabolic process	99	0.344097	1.60845	0.0023196	0.0191459	0.0142102	5122	tags=36%, list=20%, signal=29%	2819/51422/2584/5164/5562/2203/2027/351/55526/5224/9611/5465/3479/53632/229/5236/3939/51085/5027/5313/5208/3101/5105/55753/6774/5091/6521/3099/4967/26330/4609/5162/8050/1738/5106/5161
BP	GO:0032495	response to muramyl dipeptide	18	-0.60887	-1.8454	0.00232552	0.0191745	0.0142314	4723	tags=61%, list=19%, signal=50%	51510/7128/90933/8767/64170/26191/10392/182/7431/9181/23641
BP	GO:0045606	positive regulation of epidermal cell differentiation	20	-0.594172	-1.88708	0.00235414	0.0193291	0.0143461	1642	tags=50%, list=7%, signal=47%	5727/2810/474/2296/652/5583/4926/6820/2118/58495
BP	GO:0042119	neutrophil activation	36	-0.500106	-1.82241	0.00235414	0.0193291	0.0143461	5204	tags=58%, list=21%, signal=46%	6338/2207/5724/6814/6688/57580/3684/1511/10394/11314/3689/6813/7305/6850/5580/3600/306/6352/6372/2896/301
BP	GO:2000401	regulation of lymphocyte migration	56	-0.434602	-1.76329	0.00234915	0.0193291	0.0143461	4241	tags=39%, list=17%, signal=33%	7474/81704/101/6793/58494/3676/4478/729230/6347/387/8764/29108/347/9466/1235/6387/199/3627/6352/11035/27347/6366
BP	GO:0002456	T cell mediated immunity	106	-0.356616	-1.63706	0.00235399	0.0193291	0.0143461	4717	tags=51%, list=19%, signal=42%	11006/7133/6885/259307/2625/3824/56940/22890/51561/7784/91543/3123/5788/3004/10384/3135/7292/3821/911/3125/975/970/1512/100507436/567/5551/3071/1178/3592/729230/114548/910/3594/6504/3140/11118/909/3133/7186/1075/913/5532/7454/54440/64005/3136/182/3105/11035/925/3122/3106/3134/3575
CC	GO:0032279	asymmetric synapse	289	-0.275679	-1.4342	0.00240537	0.0197291	0.014643	4073	tags=24%, list=16%, signal=21%	2596/10097/5025/8516/80758/2905/401190/51201/64130/22829/9419/23043/28964/3751/55607/1821/2171/476/158866/10006/26052/55450/134/28988/9123/81831/55737/9495/150/4067/1627/9201/120/3631/6208/8898/85461/1949/6714/747/6232/4900/6132/4131/78999/6230/775/6804/10505/10486/6222/6175/6207/118/6136/1501/6156/6223/6188/64084/6169/23208/57689/1410/135/53335/23623/11178/8440/22883
CC	GO:0035578	azurophil granule lumen	81	-0.385603	-1.68634	0.00241262	0.0197679	0.0146718	2961	tags=30%, list=12%, signal=26%	10493/2171/2717/2760/6036/81567/1511/175/8635/1075/5036/29108/4069/3074/10487/10577/302/5476/5580/58485/4125/3614/2896/5834
BP	GO:0031334	positive regulation of protein-containing complex assembly	164	-0.30793	-1.4906	0.00242773	0.0198708	0.0147482	4383	tags=34%, list=17%, signal=28%	7040/5341/1015/3936/9873/7157/2241/51100/859/10602/4314/81857/6369/6622/143098/10273/81620/638/8115/80115/51199/274/28964/3071/4478/21/387/9793/5058/3958/7376/5216/9636/29108/389/403/6714/581/4131/51466/89795/6850/115362/4926/55612/5879/402/10344/10109/6188/148170/23580/8440/1236/6366
BP	GO:0006936	muscle contraction	317	-0.265414	-1.39656	0.00244259	0.0199716	0.014823	5310	tags=31%, list=21%, signal=24%	93649/805/624/89/6338/3768/1829/7134/8811/92241/1264/5142/4606/6331/3357/10874/781/5724/845/2697/57057/859/4660/384/4629/6330/5025/1674/3764/10203/7423/3762/3728/140465/2281/1613/8654/952/274/1907/6332/2010/3281/287/10911/4637/5021/476/255743/100/387/134/5997/808/126306/3741/8877/3164/150/59/2934/1906/226/23213/4634/6548/1193/7168/3270/59272/6717/775/7136/1160/10848/857/51738/51196/23171/1910/717…
BP	GO:0085029	extracellular matrix assembly	44	-0.456657	-1.76433	0.00244911	0.0199832	0.0148316	1186	tags=25%, list=5%, signal=24%	10516/5768/23187/1281/3912/11117/1278/6662/84168/30008/4239
BP	GO:0014068	positive regulation of phosphatidylinositol 3-kinase signaling	73	-0.402489	-1.72862	0.00244703	0.0199832	0.0148316	2929	tags=37%, list=12%, signal=33%	5747/653361/4150/6403/5154/3082/867/8678/6714/4920/284/7042/10870/54209/6352/10507/940/3059/219699/6662/5156/3815/5777/5155/5159/80310/1634
BP	GO:0031098	stress-activated protein kinase signaling cascade	225	-0.294271	-1.49074	0.00245193	0.0199854	0.0148332	4412	tags=28%, list=18%, signal=23%	8324/859/5734/2305/5911/9506/7098/653361/3276/3265/8767/392255/6688/91862/23043/55872/6504/9770/387/54106/3082/22881/7188/8877/51339/7186/4067/64170/10125/9965/29108/9459/26191/10550/652/650/10392/4920/2874/7042/54209/5603/939/51284/10045/11184/10044/5595/1410/3965/148170/846/9464/5602/55504/27347/3476/2950/6363/1236/3489/6366
BP	GO:1902410	mitotic cytokinetic process	21	-0.588236	-1.88838	0.00245575	0.0199958	0.0148409	7944	tags=71%, list=32%, signal=49%	27243/55165/128866/375/92421/200942/9525/129531/51510/10112/5119/387/57132/29082/23636
CC	GO:0043292	contractile fiber	222	-0.289958	-1.46679	0.00248729	0.0202315	0.0150159	5348	tags=32%, list=21%, signal=26%	2280/805/89/4703/7134/9124/5142/6331/27063/2318/845/2697/859/4660/4629/9457/1674/3315/3764/10273/3728/84033/140465/2281/11344/27295/80206/118461/274/287/22954/23345/9260/3611/342527/255743/71/808/343263/3741/59/5058/1465/171024/91977/23022/226/114907/4634/29964/3880/7168/5532/2274/64236/3270/10529/6253/6717/775/7136/6513/288/7171/4622/81/10398/58529/7169/91624/1410/2275
BP	GO:0006103	2-oxoglutarate metabolic process	16	0.613678	1.87619	0.00249567	0.0202786	0.0150508	3859	tags=50%, list=15%, signal=42%	51166/5264/2806/92259/3418/55753/4967/79944
BP	GO:0002720	positive regulation of cytokine production involved in immune response	63	-0.415029	-1.72806	0.00251121	0.0203837	0.0151289	4673	tags=37%, list=19%, signal=30%	3135/7474/7292/23586/975/567/10666/114548/6504/3133/7186/8764/7805/8140/117854/54440/3105/3098/10417/51704/3815/3134/972
BP	GO:0006911	phagocytosis, engulfment	51	-0.437449	-1.73309	0.00252623	0.0204844	0.0152036	3903	tags=41%, list=16%, signal=35%	2209/399/51454/3071/4627/3684/11031/10347/2934/11314/8678/3689/3543/5879/9938/199/54209/3673/4240/5880/391
BP	GO:0060350	endochondral bone morphogenesis	55	-0.428801	-1.72974	0.00256846	0.0208053	0.0154418	3992	tags=33%, list=16%, signal=28%	5915/860/55790/1305/5914/85301/8313/2296/4146/652/1277/1281/4208/338773/4209/6662/871/2261
CC	GO:0005902	microvillus	82	-0.368818	-1.61959	0.00262089	0.0212081	0.0157407	3021	tags=29%, list=12%, signal=26%	10630/1800/4478/526/1836/5021/5154/3685/525/4641/23114/8140/529/284/64005/150696/10083/768/5420/4642/83700/5156/84958/8842
BP	GO:0032715	negative regulation of interleukin-6 production	42	-0.467549	-1.78139	0.00263477	0.0212984	0.0158078	3097	tags=33%, list=12%, signal=29%	6376/3071/6504/2621/54106/3082/55024/26191/10365/9466/51738/23208/3635/5777
BP	GO:0060284	regulation of cell development	450	-0.253255	-1.38178	0.00263841	0.0213059	0.0158133	5681	tags=32%, list=23%, signal=26%	23462/7804/84079/5991/6405/28514/54437/4915/2670/10562/3066/9856/89/7040/7274/10494/57463/23529/29882/91663/2290/10519/85458/65078/5365/3976/55198/4057/8600/10371/388585/8434/4803/3706/7474/474/5728/7157/6833/9037/23440/10419/9723/6790/25/859/1524/7869/56920/11141/10097/23129/259266/2931/10500/4739/2737/55920/284403/2048/3213/7533/567/5457/11344/8654/140578/7976/51199/274/6376/644943/26022/4135/2…
MF	GO:0015101	organic cation transmembrane transporter activity	25	0.535574	1.8621	0.00264659	0.0213484	0.0158448	2367	tags=40%, list=9%, signal=36%	10478/79572/788/284439/23428/6581/80704/6582/6580/204962
BP	GO:0060759	regulation of response to cytokine stimulus	141	-0.327145	-1.56622	0.00265185	0.0213484	0.0158448	5354	tags=32%, list=21%, signal=25%	146722/84166/4940/5788/5598/3654/7128/7474/11140/23586/103/90933/8767/3326/56339/353376/6586/22954/2621/8996/8877/7186/81030/1906/7376/9636/7805/29108/117854/2874/284/6850/857/54209/6352/2672/834/9641/7852/9353/5777/100133941/2950/972/83643
BP	GO:0072522	purine-containing compound biosynthetic process	155	0.308818	1.54544	0.00264944	0.0213484	0.0158448	5192	tags=36%, list=21%, signal=29%	51703/51422/132/5631/441024/221823/2180/4522/5164/38/79646/2981/2618/2639/53354/10165/5471/32/80347/5465/6470/10891/203/5198/7415/9626/4507/4833/55022/5313/107/8034/142/6472/79071/523/262/51000/23305/79877/55276/471/197322/3251/4609/50808/5162/2979/8050/23181/23417/1738/5161/10861/272/5635
BP	GO:0030301	cholesterol transport	69	0.400434	1.75842	0.00266536	0.0214131	0.0158929	2618	tags=32%, list=10%, signal=29%	1071/338/255738/10802/5007/19/948/114880/3931/3990/6770/9388/1191/116519/10351/6342/219931/1066/1582/3949/5045/4040
MF	GO:0015293	symporter activity	139	0.313308	1.54663	0.00266268	0.0214131	0.0158929	3882	tags=28%, list=15%, signal=24%	55089/6505/23516/54407/120103/10246/284111/79751/6532/123041/113235/57468/4891/9153/6580/114134/6567/159963/28968/6529/6554/246213/84561/9963/83733/6506/6575/9962/113655/6526/6570/6574/51151/6571/9197/1497/6527/57282/387700
BP	GO:0051403	stress-activated MAPK cascade	220	-0.293256	-1.48096	0.00269765	0.0216503	0.0160689	4412	tags=27%, list=18%, signal=23%	8324/859/5734/2305/5911/9506/7098/653361/3276/3265/8767/392255/6688/91862/23043/55872/6504/9770/54106/3082/22881/7188/8877/51339/7186/64170/10125/9965/29108/9459/26191/10550/652/650/10392/4920/2874/7042/54209/5603/939/51284/10045/11184/10044/5595/1410/3965/148170/846/9464/5602/55504/27347/3476/2950/6363/1236/3489/6366
BP	GO:0034976	response to endoplasmic reticulum stress	213	0.282703	1.48454	0.00270418	0.0216805	0.0160914	5926	tags=33%, list=24%, signal=25%	51439/9354/160418/84919/1981/7060/8893/6400/29979/9131/22926/51360/84699/2213/80267/487/84899/666/1965/55768/51569/11160/10613/378884/1191/9097/57003/4121/5516/55161/7415/6048/55432/3303/5611/1654/4189/5923/488/54788/9601/468/11124/7844/51136/115290/91445/5295/267/8795/9695/201595/3309/337867/282679/79982/11315/5771/4976/440275/84447/81502/8975/837/10869/2923/7327/7706/80020/10955
CC	GO:0033178	proton-transporting two-sector ATPase complex, catalytic domain	13	-0.665334	-1.84594	0.00272922	0.0218366	0.0162072	4230	tags=62%, list=17%, signal=51%	51382/90423/51606/526/525/529/537/9296
BP	GO:0006334	nucleosome assembly	43	-0.457978	-1.75325	0.00272673	0.0218366	0.0162072	3039	tags=30%, list=12%, signal=27%	51773/6418/23270/4676/401541/8208/4675/85453/4673/10541/23234/3148/6662
BP	GO:0001959	regulation of cytokine-mediated signaling pathway	132	-0.338399	-1.60523	0.00275046	0.021984	0.0163166	5354	tags=33%, list=21%, signal=26%	146722/84166/4940/5788/3654/7128/7474/11140/103/90933/8767/3326/56339/353376/6586/22954/2621/8996/8877/7186/81030/1906/7376/9636/7805/29108/117854/2874/284/6850/857/54209/6352/2672/834/9641/7852/9353/5777/100133941/2950/972/83643
BP	GO:0071709	membrane assembly	52	-0.434657	-1.73378	0.00275738	0.0220169	0.016341	5553	tags=42%, list=22%, signal=33%	7329/10211/51510/858/5728/859/9379/11141/7357/22829/2048/5119/6810/57132/29082/302/288/857/6281/8815/93099/57555
BP	GO:0006400	tRNA modification	65	0.388502	1.68608	0.002764	0.0220472	0.0163636	2753	tags=28%, list=11%, signal=25%	54517/127253/285605/80324/221078/54802/84267/339175/54888/10785/150962/57505/3028/55140/64172/60487/84705/55253
BP	GO:0072524	pyridine-containing compound metabolic process	28	0.5239	1.866	0.00277015	0.0220739	0.0163833	2052	tags=36%, list=8%, signal=33%	8942/8564/10135/23475/55163/125061/65220/29968/57026/4837
BP	GO:0006633	fatty acid biosynthetic process	143	0.312945	1.55324	0.00278271	0.0221514	0.0164409	4982	tags=34%, list=20%, signal=27%	50640/51422/84696/6296/255189/5562/552/5825/1544/3990/9388/32/11160/10613/53632/551/27349/116519/84869/1543/51085/54995/54988/33/26063/123876/1576/4706/1558/55825/50487/79071/672/634/37/348158/197322/2695/247/1581/11057/335/171586/10728/1571/1559/23417/5565
BP	GO:0000070	mitotic sister chromatid segregation	142	-0.327922	-1.57014	0.00279419	0.0221977	0.0164752	5631	tags=34%, list=22%, signal=26%	5925/286053/699/11004/1062/9212/1063/81930/51510/9126/79075/3833/29127/84861/56984/81620/64151/7517/7756/11065/10300/7272/11130/9319/5119/9493/57132/29082/991/8766/29945/9918/8678/23636/9184/9055/3550/9232/113130/9735/4926/27175/10540/51203/9985/10403/5518/51451
BP	GO:0007265	Ras protein signal transduction	311	-0.272402	-1.42631	0.00279323	0.0221977	0.0164752	4410	tags=29%, list=18%, signal=24%	25/5912/57381/10602/396/2305/4650/5911/56882/2859/116442/22800/10411/399/4254/3265/2048/29899/9363/890/22821/5899/283455/9649/22898/51735/56990/2846/10630/266747/392/11188/11186/6016/8625/387/9620/28988/2841/867/2782/150/10152/10155/3707/2768/253980/27040/3675/10125/23636/3925/393/7454/23370/10163/54869/5879/51209/23096/7042/30851/10252/51196/199/83478/22808/1902/1072/1281/1029/8437/25959/397/963…
MF	GO:0048038	quinone binding	14	0.64549	1.86549	0.00280069	0.0222268	0.0164968	4412	tags=71%, list=18%, signal=59%	2110/4720/6390/84869/314/154807/6392/374291/79001/80219
BP	GO:0000819	sister chromatid segregation	168	-0.300861	-1.46626	0.00282222	0.022375	0.0166068	8567	tags=51%, list=34%, signal=34%	51433/51434/225689/79980/7283/4342/25836/79998/24137/64105/27243/55143/23397/4085/84101/84722/10735/27436/10460/8467/10664/128866/4751/114799/5889/92421/3837/7155/55869/10051/1843/9525/10464/5925/11331/286053/699/11004/1062/9212/1063/81930/51510/9126/79075/3833/29127/84861/56984/81620/64151/7517/7756/11065/10300/7272/11130/9319/5119/9493/57132/29082/991/8313/7153/2237/8766/55743/29945/9918/8678/2…
BP	GO:0140546	defense response to symbiont	258	-0.279832	-1.43312	0.00282697	0.0223899	0.0166179	6022	tags=36%, list=24%, signal=27%	26065/57169/3663/51561/566/3459/91543/56829/11331/3433/10875/9447/84166/665/9698/4940/5788/59067/3687/7128/3437/3428/598/5654/23586/51311/4599/103/684/79102/7098/9582/90933/3764/3446/100507436/4277/6041/55601/27350/50489/80212/10346/5551/3460/22954/57337/3594/81603/6036/81559/958/54541/54106/3588/2537/81030/10155/3445/4939/64170/9636/10964/8678/29108/26191/3429/29800/8519/117854/60489/64108/596/8…
CC	GO:0030665	clathrin-coated vesicle membrane	107	-0.348011	-1.60012	0.00284089	0.0224775	0.0166829	4800	tags=36%, list=19%, signal=30%	3118/7474/3117/22905/3125/3120/2209/1211/8546/3119/1839/55707/554/50489/9182/7039/1601/4074/28988/1212/1173/4920/4900/2535/8673/6456/84251/8906/3113/3122/23208/915/3115/1080/972/6844/9341/3575/917
BP	GO:1903317	regulation of protein maturation	56	-0.430148	-1.74522	0.00284896	0.0225185	0.0167134	3140	tags=36%, list=12%, signal=31%	29934/26022/4627/8996/147372/2934/9528/6714/302/199713/79094/2734/85409/6659/10418/6281/8530/51098/5270/2619
BP	GO:0042481	regulation of odontogenesis	17	-0.609117	-1.8202	0.00286289	0.0226059	0.0167782	2041	tags=47%, list=8%, signal=43%	860/1906/80326/652/650/4487/147495/947
BP	GO:0010559	regulation of glycoprotein biosynthetic process	38	-0.484984	-1.804	0.00286971	0.0226369	0.0168012	3402	tags=34%, list=14%, signal=30%	20/1839/10347/9528/25825/23385/596/3600/9452/6363/1236/81618/6366
CC	GO:0030127	COPII vesicle coat	14	0.643543	1.85987	0.00291658	0.0229835	0.0170584	3364	tags=50%, list=13%, signal=43%	10802/9871/10427/51128/51014/56681/10484
BP	GO:0006706	steroid catabolic process	27	0.508977	1.80932	0.00292326	0.023013	0.0170803	5052	tags=56%, list=20%, signal=44%	1544/3290/51302/6716/8630/6718/1576/51171/6715/51170/1591/6783/1581/8578/10858
BP	GO:0019885	antigen processing and presentation of endogenous peptide antigen via MHC class I	17	-0.60872	-1.81901	0.00293229	0.0230377	0.0170987	4673	tags=71%, list=19%, signal=58%	3135/6891/64167/567/3133/23457/6892/6890/3136/3105/3106/3134
BP	GO:0034109	homotypic cell-cell adhesion	85	-0.376378	-1.65803	0.00293076	0.0230377	0.0170987	5206	tags=45%, list=21%, signal=36%	5341/1829/8600/10076/5912/3043/60/6814/2778/3315/23173/3728/10630/375033/4627/3611/71/4267/1511/4352/6812/4067/1465/83706/7301/6850/5580/288/114897/6352/84034/10398/5270/5294/5156/10077/5777/1192
BP	GO:0002604	regulation of dendritic cell antigen processing and presentation	11	-0.679902	-1.77721	0.00295183	0.023168	0.0171954	1360	tags=45%, list=5%, signal=43%	10392/972/6363/1236/6366
BP	GO:0051962	positive regulation of nervous system development	244	-0.279141	-1.42546	0.00295933	0.0232036	0.0172218	5473	tags=33%, list=22%, signal=26%	4915/347902/2670/3066/7040/10494/57463/2895/23529/29882/158038/84631/2290/85458/5365/3976/4803/3706/9037/23440/10419/54674/1524/11141/869/10097/23129/259266/2737/284403/2048/11344/57633/140578/7976/51199/274/6376/644943/4135/22954/5021/28988/55558/4067/1627/8766/26230/27286/3065/2049/5764/7058/55179/650/5583/4131/706/23768/4049/6387/5361/51738/4673/64218/10507/6692/64084/51393/5270/6604/7852/3815…
BP	GO:0002475	antigen processing and presentation via MHC class Ib	14	-0.647204	-1.83069	0.0029658	0.0232311	0.0172422	5652	tags=86%, list=22%, signal=66%	8943/3135/911/6891/8546/567/910/909/3133/913/3136/3134
BP	GO:0002718	regulation of cytokine production involved in immune response	92	-0.372198	-1.66394	0.00297462	0.0232769	0.0172762	4673	tags=34%, list=19%, signal=28%	3135/7474/7292/23586/975/684/7098/567/10666/1178/729230/114548/6504/3133/7186/695/8764/7805/8140/117854/284/54440/7042/3105/3098/10417/51704/10225/3815/3134/972
BP	GO:1904705	regulation of vascular associated smooth muscle cell proliferation	50	-0.440412	-1.74446	0.0029939	0.0232882	0.0172846	5310	tags=42%, list=21%, signal=33%	93649/1264/5728/2697/4318/5031/3488/2254/8862/387/657/9510/1906/2768/7168/55810/4208/4209/2771/5155/30008
BP	GO:0045010	actin nucleation	41	-0.458529	-1.7371	0.00298224	0.0232882	0.0172846	4731	tags=41%, list=19%, signal=34%	9873/10092/10552/85477/10093/10097/10152/2934/10095/9535/57175/51466/7454/10163/10094/10109/11151
BP	GO:0032613	interleukin-10 production	54	-0.420967	-1.68246	0.00299221	0.0232882	0.0172846	2394	tags=28%, list=10%, signal=25%	54106/3082/959/9636/29108/7305/6850/54440/961/54209/28951/940/3965/27242/947
BP	GO:0032653	regulation of interleukin-10 production	54	-0.420967	-1.68246	0.00299221	0.0232882	0.0172846	2394	tags=28%, list=10%, signal=25%	54106/3082/959/9636/29108/7305/6850/54440/961/54209/28951/940/3965/27242/947
BP	GO:0043406	positive regulation of MAP kinase activity	109	-0.353145	-1.62468	0.0029826	0.0232882	0.0172846	5278	tags=34%, list=21%, signal=27%	2322/7040/5788/3654/8600/3357/7474/56034/101/50507/4254/3265/8325/8654/7039/5154/958/54106/150/7186/5058/1906/4486/1856/10125/6714/4920/6850/2064/6188/5294/3815/5155/5159/100133941/80310/6363
MF	GO:0016829	lyase activity	159	0.304635	1.53947	0.00298623	0.0232882	0.0172846	4093	tags=30%, list=16%, signal=25%	494143/3295/2271/51011/377677/3146/84105/3052/4337/1892/2027/1544/875/4913/10841/2739/51540/3155/55268/55556/593/229/3030/1644/55862/5805/151313/1543/51071/80746/5092/435/5105/107/26061/23632/760/55253/2677/171425/262/10994/51380/2731/1586/130013/3034/210
BP	GO:0006096	glycolytic process	76	0.37874	1.69634	0.0030435	0.0236117	0.0175247	4276	tags=37%, list=17%, signal=31%	2819/51422/2584/5562/2203/2027/351/55526/5224/9611/5465/3479/53632/229/5236/3939/51085/5027/5313/5208/3101/55753/6774/6521/3099/4967/26330/4609
BP	GO:0006757	ATP generation from ADP	76	0.37874	1.69634	0.0030435	0.0236117	0.0175247	4276	tags=37%, list=17%, signal=31%	2819/51422/2584/5562/2203/2027/351/55526/5224/9611/5465/3479/53632/229/5236/3939/51085/5027/5313/5208/3101/55753/6774/6521/3099/4967/26330/4609
BP	GO:0002062	chondrocyte differentiation	97	-0.354361	-1.60023	0.00304453	0.0236117	0.0175247	4552	tags=31%, list=18%, signal=25%	51222/85477/81029/81792/5915/22856/54360/2737/860/392255/11173/2254/657/85301/8313/23213/864/4146/652/650/2734/2202/64764/1281/4208/4209/6662/871/2261/4192
BP	GO:0042045	epithelial fluid transport	10	-0.70076	-1.78238	0.00305324	0.0236558	0.0175575	2041	tags=80%, list=8%, signal=74%	1437/65010/6338/1906/1910/6523/358/1080
BP	GO:0007005	mitochondrion organization	395	0.240644	1.35676	0.00308872	0.023907	0.0177439	4385	tags=25%, list=17%, signal=21%	664/23788/2729/9093/7156/1763/3329/6832/3375/4718/9131/22885/3791/2395/5562/7855/4720/6687/4719/2066/487/27069/666/10105/131118/87178/80224/192111/80273/3155/91137/3479/10469/551/1191/9512/64756/10891/25994/291/55210/5516/10449/4124/10075/3028/3308/51103/26073/55022/55735/5027/3954/9650/3303/3313/9361/4534/9927/51499/7323/4706/9474/7015/134266/5428/54968/142/91647/9530/10935/55669/374291/55572/23…
MF	GO:0008047	enzyme activator activity	448	-0.246372	-1.34316	0.00310051	0.0239746	0.0177941	6267	tags=34%, list=25%, signal=26%	55507/10435/572/23236/9141/317/2664/10681/153090/11232/9644/10451/1616/267012/22930/2534/196513/102723859/141/84253/84079/115704/1163/5605/5922/23092/9905/166979/219771/8812/805/23637/54828/25780/26575/117289/26037/4057/3357/200185/128272/6789/4660/654817/4689/80777/10811/396/4650/54344/2778/51065/2011/129049/653361/79822/29127/7862/1512/3619/2980/22821/84986/8115/5999/1603/9462/842/1650/28964/46…
BP	GO:0007517	muscle organ development	298	-0.273779	-1.43227	0.00311052	0.0240283	0.0178339	5348	tags=29%, list=21%, signal=23%	2280/93649/6899/10409/89/10211/7040/4703/126272/1063/7134/3976/5081/858/7474/27063/2697/221937/57057/859/150921/2121/55898/1674/607/8320/84159/146862/1839/140465/5457/283078/140578/2006/2010/1120/4637/1489/387/6443/657/23414/115509/78994/3164/2263/8321/150572/4634/2296/7832/7168/10791/652/650/6876/6717/2022/7042/596/2535/9242/7026/857/4487/3627/1281/6444/3792/3399/4208/58529/8506/26508/8910/1410/…
BP	GO:0034349	glial cell apoptotic process	16	-0.624261	-1.8205	0.00311918	0.0240423	0.0178443	5631	tags=69%, list=22%, signal=53%	5925/28514/7157/842/2621/6347/7186/5583/5580/54209/27242
BP	GO:0061005	cell differentiation involved in kidney development	57	-0.431655	-1.75585	0.00312172	0.0240423	0.0178443	2100	tags=44%, list=8%, signal=40%	5727/84662/10409/3976/2828/7484/4318/2737/8826/59/5613/652/1910/182/25937/5420/4208/6772/1909/54361/5155/6943/100133941/947/8842
BP	GO:0038061	NIK/NF-kappaB signaling	113	-0.344728	-1.58537	0.00311858	0.0240423	0.0178443	2860	tags=27%, list=11%, signal=24%	4791/114548/942/3611/9770/387/54106/8996/8877/7186/1906/10616/7805/7205/11156/26191/7114/10392/3430/9516/54209/8717/81/11035/939/51284/6188/9641/3965/6363
MF	GO:0003924	GTPase activity	284	-0.272148	-1.41131	0.00312523	0.0240423	0.0178443	5537	tags=34%, list=22%, signal=27%	10966/23221/338322/26225/51285/112714/5872/53917/5898/346562/26575/51715/10981/7278/1938/9367/84617/9630/132946/5912/57381/5865/54509/4599/5911/115827/2778/116442/381/22800/1917/399/3265/94235/2787/9363/23682/5899/5999/9343/51560/64121/6903/115361/5869/51762/6016/10123/84790/26052/387/5997/11031/10670/2782/2793/8766/8490/6236/23433/2768/2769/10287/2669/28954/9609/389/403/7846/10376/347733/377/115…
MF	GO:0016887	ATP hydrolysis activity	277	0.25901	1.40699	0.00312768	0.0240423	0.0178443	6753	tags=35%, list=27%, signal=26%	10146/83752/6683/1763/3329/6832/64794/5825/27348/170506/3336/6687/221458/23095/490/10845/80224/83990/24/56919/55729/10693/54505/51202/83473/22948/55210/9188/9557/57647/11269/7415/60625/10131/3308/89797/344905/3508/3303/55308/3313/1654/55605/5189/1106/9361/79039/5982/4643/10575/664618/11056/84896/1656/908/10111/84643/56897/6595/3309/54606/6950/64848/23347/4621/84056/1662/9928/10939/64240/1105/5769…
BP	GO:0019370	leukotriene biosynthetic process	19	-0.608849	-1.90471	0.00313896	0.0240582	0.0178561	2807	tags=42%, list=11%, signal=37%	4056/10394/6850/4048/241/5322/2687/124975
BP	GO:1903844	regulation of cellular response to transforming growth factor beta stimulus	117	-0.334756	-1.55261	0.00313345	0.0240582	0.0178561	5348	tags=35%, list=21%, signal=28%	2280/93649/7040/94031/283149/51341/25805/858/7157/859/9839/5654/8516/161742/10273/3326/26524/124857/10755/255743/4435/1601/79674/3675/114990/5300/650/2734/2022/55612/10252/857/2348/11117/65997/56937/27122/1028/8425/9719/7041
BP	GO:0051099	positive regulation of binding	160	-0.313381	-1.51361	0.00313706	0.0240582	0.0178561	5631	tags=39%, list=22%, signal=31%	5925/4931/640/2280/93649/805/10211/7040/64641/114991/25805/4803/7474/6789/25/81857/3662/4318/23129/1488/8721/6135/8767/81620/7295/90780/3326/567/5457/5899/5334/55323/115908/4242/5914/808/3955/51339/10155/3646/121665/2296/1193/302/5300/652/149628/650/3925/117854/857/26086/118/10418/6281/6737/3673/51053/23228/8664/3148/65057/9464
BP	GO:0033674	positive regulation of kinase activity	424	-0.247944	-1.34411	0.00314398	0.0240731	0.0178671	3939	tags=34%, list=16%, signal=29%	5621/2081/22943/3717/219736/55507/572/7436/4216/153090/6259/10464/10451/51561/1616/566/4919/4908/7804/63967/3645/3123/11331/1163/5605/4915/219771/8812/805/2322/1062/7040/5788/3654/10519/4057/8600/3357/7474/7075/6789/25/116/56034/101/975/50507/1741/2044/285220/2209/5716/2011/5747/4739/7098/653361/2041/6622/1917/3619/4254/3265/7295/8325/2048/3326/1839/8654/8115/5899/4921/3071/7039/8826/388121/942/5…
BP	GO:0043649	dicarboxylic acid catabolic process	18	0.599562	1.90266	0.0031474	0.0240758	0.0178691	4400	tags=50%, list=17%, signal=41%	443/2752/10588/23475/2746/2806/10840/197322/60496
BP	GO:0007599	hemostasis	213	-0.292086	-1.46636	0.00315132	0.0240822	0.0178739	3527	tags=28%, list=14%, signal=24%	23173/8546/2048/554/6484/10630/3932/6403/375033/5154/4627/3611/2621/1609/71/958/7103/1511/2821/4352/6812/150/4067/308/1465/1906/959/83706/2768/7301/2162/5328/2192/6714/10544/7454/6850/5580/7450/857/114897/3673/653145/953/1281/84034/10398/2191/1606/5270/135/5294/5156/10077/5777/5155/2152/1192/947/5327
MF	GO:0015294	solute:cation symporter activity	103	0.343232	1.60783	0.0031718	0.0242151	0.0179725	3821	tags=31%, list=15%, signal=26%	6505/23516/54407/10246/284111/79751/6532/113235/57468/4891/9153/6580/114134/159963/6529/6554/84561/9963/83733/6506/6575/9962/113655/6526/6570/6574/51151/6571/9197/1497/6527/57282
MF	GO:0016407	acetyltransferase activity	63	0.391288	1.68458	0.00318764	0.0243123	0.0180447	6285	tags=43%, list=25%, signal=32%	10/38/340562/3931/30/39/3030/10449/1387/23464/55140/15/8648/157570/64841/1629/1384/8520/1386/138474/8202/80168/6880/6872/5051/112483/2959
BP	GO:0043122	regulation of I-kappaB kinase/NF-kappaB signaling	226	-0.292263	-1.4799	0.00320615	0.0244297	0.0181318	5752	tags=35%, list=23%, signal=27%	2534/4919/3123/8878/7329/7088/124583/60401/2280/5966/3654/28952/10318/4057/8600/3357/7128/7474/161725/2697/25/1936/684/7098/3315/399/8767/10346/80833/6376/353376/22954/81603/57161/958/387/54106/7188/56674/7186/10616/64170/6284/55072/29108/23636/389/3065/84433/10133/57153/10392/117854/284/84336/9516/11040/51246/54503/54209/6737/1902/8717/51704/834/6275/9641/347734/3965/6772/55504/5587/10537/2950/9…
BP	GO:0001764	neuron migration	146	-0.320673	-1.5429	0.00321134	0.0244455	0.0181436	5791	tags=36%, list=23%, signal=28%	84628/2534/23654/4915/585/6656/9856/63923/2624/2290/1952/23245/10371/474/89796/2697/57057/885/56751/259266/343472/2011/284403/30012/7976/6376/2621/54541/54820/9620/221692/26468/9201/57178/3675/347733/581/4131/5879/23768/4929/6387/7026/1281/2796/4756/4208/7852/51473/4692/9181/4192
BP	GO:0048880	sensory system development	363	-0.261927	-1.39657	0.00323187	0.0245779	0.0182418	4811	tags=26%, list=19%, signal=21%	84062/10371/388585/7054/3859/7474/2697/1545/2295/8820/7484/57381/8412/81029/55212/56917/5915/5158/2737/1295/3299/161742/4810/114789/90780/2048/146862/5457/1409/6597/128637/4237/1414/2254/5797/3684/261734/712/5914/24147/22899/2782/10152/7289/9355/284217/5090/10312/57045/639/2296/3065/10586/1290/55000/652/80714/54549/26160/581/775/1282/9742/4286/7042/10848/6152/6297/1289/596/2202/64919/10083/10252/…
BP	GO:0001767	establishment of lymphocyte polarity	13	-0.660778	-1.8333	0.00325072	0.0246734	0.0183127	4241	tags=54%, list=17%, signal=45%	81704/4627/2934/1794/6363/1236/6366
BP	GO:0043467	regulation of generation of precursor metabolites and energy	110	0.342253	1.61788	0.00325044	0.0246734	0.0183127	4622	tags=33%, list=18%, signal=27%	664/2819/51422/3416/3454/5167/5562/201626/2203/27069/10105/3795/351/87178/9611/5465/3479/10891/7124/7415/51085/10131/5027/79660/10580/6774/6472/5290/6521/10063/26330/4609/3481/2642/11315/208
BP	GO:0051100	negative regulation of binding	148	-0.323211	-1.55606	0.00327137	0.0247947	0.0184027	4826	tags=33%, list=19%, signal=27%	3433/3066/9212/129531/5028/84062/3428/6790/147138/60/5499/79822/10273/567/6672/5899/3676/56257/51773/124857/4776/4133/1400/1601/51339/9355/6612/1454/9270/7114/5300/581/6717/5580/8751/2962/857/489/4487/9775/25979/3001/10763/5595/146198/9464/5155/58499/51176
BP	GO:0036293	response to decreased oxygen levels	266	-0.277698	-1.42535	0.00327304	0.0247947	0.0184027	3578	tags=24%, list=14%, signal=21%	5066/7423/10273/890/4524/952/10397/3751/139341/1788/5021/5154/57085/100/387/54541/2071/7515/134/8996/5228/3741/5740/867/4352/1906/212/824/5328/8678/114990/6548/126374/6714/8614/5300/650/8751/6513/3779/4049/7042/596/4929/6387/857/9915/54209/3673/768/81/1535/1410/7852/846/1909/7424/358/100133941/6649/947/5327/114757
BP	GO:0001768	establishment of T cell polarity	12	-0.680446	-1.8289	0.00328412	0.0248546	0.0184472	4241	tags=58%, list=17%, signal=49%	81704/4627/2934/1794/6363/1236/6366
BP	GO:0006953	acute-phase response	47	0.432253	1.74681	0.00330786	0.0249619	0.0185268	8774	tags=62%, list=35%, signal=40%	2157/6291/7036/325/3570/23780/7124/57817/2335/3929/7442/5005/5345/9332/1401/59307/6288/3552/445/5265/8792/6289/5733/2/3700/1268/259249/197/50616
BP	GO:1903018	regulation of glycoprotein metabolic process	43	-0.454205	-1.73881	0.00330255	0.0249619	0.0185268	3402	tags=33%, list=14%, signal=28%	20/1839/10347/9528/25825/1471/23385/596/3600/9452/6363/1236/81618/6366
MF	GO:0019955	cytokine binding	126	-0.328713	-1.54767	0.00330784	0.0249619	0.0185268	4339	tags=30%, list=17%, signal=25%	3604/1524/147138/3560/3559/643/3676/5355/10630/124857/3592/729230/3594/657/53832/1438/3685/7186/1436/3561/8764/3587/57045/114990/199713/2022/9466/1235/10663/10068/4681/2615/7852/3815/8425/972/1236/2833
MF	GO:0000062	fatty-acyl-CoA binding	21	0.576842	1.9131	0.0033192	0.0250234	0.0185725	5610	tags=52%, list=22%, signal=41%	4329/91452/2639/3030/6342/33/37/1622/8435/134526/64746
BP	GO:0014031	mesenchymal cell development	85	-0.372623	-1.64149	0.00335207	0.0252469	0.0187384	5572	tags=38%, list=22%, signal=29%	6405/54437/8854/6899/10371/3357/10016/9037/9723/57057/7869/56920/10500/4254/657/1906/9965/2296/652/10505/596/1910/182/64218/2348/10507/26508/5595/6662/9464/1909/58495
BP	GO:0048144	fibroblast proliferation	75	-0.380384	-1.64222	0.00337598	0.0254026	0.0188539	4662	tags=37%, list=19%, signal=31%	7474/51548/7157/25/56034/81857/3596/890/4921/2010/22954/5154/2621/8877/11314/57178/581/4049/1281/1019/6277/5156/358/5155/5159/2950/80310/972
BP	GO:0044872	lipoprotein localization	14	0.639324	1.84767	0.00338014	0.0254094	0.018859	1862	tags=43%, list=7%, signal=40%	338/948/51128/375056/51304/4547
BP	GO:0002638	negative regulation of immunoglobulin production	11	0.659643	1.77502	0.0033864	0.0254321	0.0188758	1869	tags=45%, list=7%, signal=42%	80762/3598/2213/9984/604
BP	GO:0035050	embryonic heart tube development	76	-0.381924	-1.65462	0.00342429	0.025692	0.0190687	7339	tags=43%, list=29%, signal=31%	6491/8928/4851/7048/1954/83852/6262/26005/10959/28514/585/7474/55036/2697/57057/55212/64321/55081/388389/1906/2296/8463/26160/2022/54345/2348/4208/51098/57216/9464/1909/6909/58495
CC	GO:0016469	proton-transporting two-sector ATPase complex	27	-0.514055	-1.7606	0.00343173	0.0257232	0.0190919	4230	tags=48%, list=17%, signal=40%	51382/533/90423/51606/526/8992/525/10312/84317/529/537/9296/10159
CC	GO:0005686	U2 snRNP	19	-0.605651	-1.89471	0.00344437	0.0257933	0.0191439	5387	tags=63%, list=21%, signal=50%	84844/83443/6637/10946/51634/6628/6638/23450/6629/10992/6633/8175
MF	GO:0010181	FMN binding	12	0.673586	1.87244	0.00349075	0.0260162	0.0193093	3281	tags=58%, list=13%, signal=51%	4552/389434/55163/54363/51179/55253/5447
BP	GO:1902644	tertiary alcohol metabolic process	22	-0.543469	-1.78269	0.00348053	0.0260162	0.0193093	2694	tags=36%, list=11%, signal=32%	653/1609/650/231/27233/57016/27122/54361
BP	GO:0016126	sterol biosynthetic process	54	0.407195	1.69841	0.00348774	0.0260162	0.0193093	4749	tags=37%, list=19%, signal=30%	1595/51422/338/51360/5562/51706/6647/11160/10613/116519/1066/10449/3158/3422/5447/4047/3930/1581/335/10682
BP	GO:0002821	positive regulation of adaptive immune response	104	-0.349079	-1.5984	0.00348976	0.0260162	0.0193093	5866	tags=44%, list=23%, signal=34%	51561/7784/91543/3123/338322/7040/5788/23529/3135/7292/911/3125/2208/975/4292/8767/567/7158/10666/3592/729230/114548/910/3594/6504/100/958/3140/909/3133/7186/695/64170/29108/913/9466/54440/4049/3136/54209/3105/940/3122/3106/3134/10673
BP	GO:0016051	carbohydrate biosynthetic process	186	0.283078	1.45705	0.00348278	0.0260162	0.0193093	5526	tags=33%, list=22%, signal=26%	2819/23516/178/57486/5167/10402/34/2683/5164/2875/1213/2998/2203/6652/3612/8864/2542/10165/84649/8789/5224/5465/3479/53632/1468/378884/9653/5236/10891/9526/4837/79660/5105/10580/7360/57818/1642/9348/468/114899/2308/5091/2632/54187/6483/2527/374907/3038/3481/208/2641/10728/5771/93010/5106/55808/5509/2131/5903/84912/3613
BP	GO:0090030	regulation of steroid hormone biosynthetic process	13	-0.655728	-1.81929	0.00352886	0.0262752	0.0195016	2694	tags=54%, list=11%, signal=48%	653/476/1609/1601/650/27122/54361
CC	GO:0001726	ruffle	158	-0.309103	-1.49608	0.00354015	0.0263343	0.0195454	5493	tags=36%, list=22%, signal=28%	1464/154796/1021/5341/5753/91663/10519/5141/23396/81930/3936/55198/25/23586/822/64419/3678/64092/10630/8826/526/9260/4627/51474/387/28988/5152/10347/4644/3685/5058/23022/4641/9270/6714/7168/6282/10163/54869/2245/55612/5879/1915/199/1072/5335/5420/26751/2191/6188/10044/54997/6277/89846/51177/143903/9181
BP	GO:0009068	aspartate family amino acid catabolic process	16	0.602036	1.8406	0.00354646	0.0263562	0.0195617	9288	tags=88%, list=37%, signal=55%	51166/443/4143/2806/10157/23464/51268/1428/157739/1743/8528/113675/2805/10993
BP	GO:0034472	snRNA 3'-end processing	18	0.594769	1.88745	0.00356705	0.0263635	0.0195671	4365	tags=56%, list=17%, signal=46%	25896/23404/26173/54512/51010/57508/118460/64852/26512/55656
CC	GO:0031528	microvillus membrane	23	-0.568212	-1.8659	0.0035651	0.0263635	0.0195671	3427	tags=52%, list=14%, signal=45%	6286/10630/1800/4478/1836/3685/8140/150696/768/5420/84958/8842
BP	GO:0032633	interleukin-4 production	32	-0.517595	-1.83227	0.00356764	0.0263635	0.0195671	5718	tags=53%, list=23%, signal=41%	7784/3123/2207/7292/3662/114548/942/5914/3133/959/8140/916/6850/54440/940/3965/51176
BP	GO:0032673	regulation of interleukin-4 production	32	-0.517595	-1.83227	0.00356764	0.0263635	0.0195671	5718	tags=53%, list=23%, signal=41%	7784/3123/2207/7292/3662/114548/942/5914/3133/959/8140/916/6850/54440/940/3965/51176
BP	GO:0008045	motor neuron axon guidance	27	-0.512496	-1.75526	0.00356764	0.0263635	0.0195671	3698	tags=44%, list=15%, signal=38%	399/3800/3199/1123/55558/3918/214/5879/2064/9353/5880/391
MF	GO:0004713	protein tyrosine kinase activity	130	-0.336238	-1.58845	0.00355759	0.0263635	0.0195671	3938	tags=38%, list=16%, signal=33%	2534/3645/5605/640/4915/55359/2322/5753/7075/25/2241/2044/285220/5747/2041/8767/2048/4921/9833/55872/3932/5157/7272/51232/8798/2263/4067/1436/695/4486/7016/7301/1949/6714/2049/4920/780/6850/5580/2202/2064/2042/8445/3702/5156/3815/7535/5159/2261/2051
BP	GO:0050000	chromosome localization	66	-0.400089	-1.68052	0.003583	0.0264271	0.0196143	8125	tags=56%, list=32%, signal=38%	79998/150465/27243/55143/84722/27436/128866/92421/3837/9525/10464/7013/11004/1062/9212/1063/81930/51510/55166/3833/10097/4292/3619/81620/10300/5119/57132/54820/29082/8766/2669/8678/23636/113130/4926/10540/10403
BP	GO:0042475	odontogenesis of dentin-containing tooth	86	-0.358008	-1.58492	0.00358095	0.0264271	0.0196143	1983	tags=23%, list=8%, signal=21%	657/1495/10312/2296/3065/9622/80326/652/650/581/2736/3714/64919/4487/147495/682/5156/9464/1080/51176
BP	GO:0043374	CD8-positive, alpha-beta T cell differentiation	13	-0.654346	-1.81546	0.00359873	0.026433	0.0196187	3634	tags=54%, list=14%, signal=46%	8320/3071/944/2841/9760/864/596
BP	GO:0006687	glycosphingolipid metabolic process	58	-0.414262	-1.6955	0.003596	0.026433	0.0196187	4436	tags=38%, list=18%, signal=31%	8869/8707/3073/2629/7357/7903/20/8703/2717/2760/8706/4758/285362/53947/9514/3074/581/51228/5580/27090/3815/8705
[truncated: 324 more rows]
