# Supplementary material for: Exploring key biomarkers of liver fibrosis progression to hepatocellular carcinoma based on immune cell-related genes
Source: Research Square preprint supplement (doi:10.21203/rs.3.rs-6479983/v1), 2025-05-21
Supplement: Supplementary file 3 [file 2c6aba55a9ddab5a99faaf1a.xlsx]

## Sheet: MCL1.GOgsea
ONTOLOGY	ID	Description	setSize	enrichmentScore	NES	pvalue	p.adjust	qvalue	rank	leading_edge	core_enrichment
BP	GO:0006956	complement activation	53	0.773797	3.30256	1e-10	2.98969e-09	1.87907e-09	3446	tags=72%, list=14%, signal=62%	715/730/1604/4239/2/710/2220/3553/3543/78989/1675/3426/716/5199/713/11326/51279/10584/735/718/8547/922/1191/714/729/2219/708/712/3078/722/325/4153/1378/10747/733/720/725/721
BP	GO:0002274	myeloid leukocyte activation	210	0.589653	3.17695	1e-10	2.98969e-09	1.87907e-09	3725	tags=50%, list=15%, signal=43%	2358/9173/3725/3569/5359/10666/728/695/7057/3949/80149/5730/8530/7099/4615/11314/6372/55509/6283/301/3662/6352/3717/90865/11326/3162/5336/3600/1191/10125/120892/2294/10538/5788/4067/57817/1776/1794/3459/2268/5880/914/7098/4495/7096/5294/6504/712/7305/3937/7048/640/306/2207/7189/23729/3596/972/7097/729230/820/199/5724/6622/11027/8723/9111/3565/8773/84868/7107/10077/84106/4317/2213/5320/3727/4055/5…
BP	GO:0002253	activation of immune response	277	0.560749	3.12785	1e-10	2.98969e-09	1.87907e-09	3446	tags=49%, list=14%, signal=43%	2357/2358/715/730/26191/1997/1604/975/4239/5359/2/5142/10666/710/728/695/3428/81030/2534/2220/3553/3702/3543/5144/78989/80149/1675/3426/925/10892/7099/716/11314/5621/79037/5199/713/1236/11326/973/51279/5583/5336/10584/735/718/2359/89857/8547/922/719/2633/55024/1191/3125/714/5788/8631/729/4067/56244/596/3635/2268/2219/54900/84174/149628/839/4068/50852/8915/9404/64332/708/712/7305/3937/919/640/2207…
BP	GO:0002250	adaptive immune response	409	0.543398	3.12718	1e-10	2.98969e-09	1.87907e-09	4752	tags=50%, list=19%, signal=41%	9173/715/730/6363/3572/64092/1604/975/3569/3665/942/5588/10666/710/3659/695/567/912/3575/2534/3553/3702/3543/10673/3133/80149/3426/639/925/8417/7133/10892/114548/7099/716/4615/939/54941/962/301/3662/8809/713/3717/3594/973/51279/735/3134/718/3554/10990/89857/10148/10288/3106/1520/1191/3125/714/10538/5788/339390/8631/608/602/729/4067/920/3635/114836/54900/84174/4092/10462/4063/54210/4068/50852/1033…
BP	GO:0002460	adaptive immune response based on somatic recombination of immune receptors built from immunoglobulin superfamily domains	276	0.557905	3.10484	1e-10	2.98969e-09	1.87907e-09	4453	tags=51%, list=18%, signal=43%	9173/715/730/6363/1604/975/3569/3665/5588/10666/710/695/567/912/3575/3553/3543/10673/3133/80149/3426/925/8417/7133/10892/114548/7099/716/4615/939/301/3662/8809/713/3594/51279/735/3134/718/3554/89857/10148/3106/1191/3125/714/10538/5788/339390/602/729/920/3635/114836/84174/4092/4063/8915/3117/3821/6774/64332/6504/708/712/7454/51311/60468/91543/2207/7189/972/64581/729230/56940/3113/3824/5551/8741/72…
BP	GO:1903039	positive regulation of leukocyte cell-cell adhesion	232	0.566211	3.08466	1e-10	2.98969e-09	1.87907e-09	4366	tags=52%, list=17%, signal=43%	6347/3037/6363/26191/3572/6366/1604/975/3569/942/5588/567/864/912/3575/2534/1949/3553/10673/3133/10892/114548/81704/939/8600/960/10164/301/240/6401/6352/3717/1236/3594/3676/10148/10288/3600/6403/3125/10125/2113/3280/5788/8631/4067/1960/3485/920/2737/8915/3117/64332/6504/8651/7048/7189/921/972/923/729230/5970/79679/3113/11151/55423/11126/2736/916/199/5724/160365/1326/3565/3119/3115/84868/3122/8038…
MF	GO:0140375	immune receptor activity	135	0.606789	3.06669	1e-10	2.98969e-09	1.87907e-09	2929	tags=49%, list=12%, signal=43%	2357/2358/9173/3572/3977/353514/728/3575/7852/8807/960/3587/1230/8809/1236/3594/7850/3554/10990/2359/10148/10288/719/3556/23547/3125/920/3459/51348/2674/2152/3117/3821/10663/9180/116379/2207/3601/972/729230/3560/3588/3113/11126/2854/3824/11027/643/2833/2675/3119/3561/3122/3593/2322/11025/3111/2213/1378/10803/1240/3455/3568/3598/3805/1233
BP	GO:0002443	leukocyte mediated immunity	351	0.53477	3.05485	1e-10	2.98969e-09	1.87907e-09	4839	tags=52%, list=19%, signal=43%	1398/715/730/1604/975/3569/3665/10666/710/695/567/912/3575/3553/1621/3543/3133/3426/5730/925/8417/7133/10892/114548/7099/716/4615/939/11314/5272/6372/8809/713/3594/51279/3162/5336/735/3134/718/3554/3106/1191/3125/10125/9188/714/2294/10538/5788/339390/602/10225/729/4067/3002/1776/3635/2268/5880/114836/84174/4092/54210/4068/7098/8915/3117/3821/5294/6504/708/712/7305/7454/51311/640/306/91543/2207/71…
BP	GO:0007159	leukocyte cell-cell adhesion	344	0.536564	3.05192	1e-10	2.98969e-09	1.87907e-09	4419	tags=49%, list=18%, signal=41%	9314/6347/3037/6363/26191/3572/6366/1604/975/3569/942/5588/6387/6402/3659/567/864/912/3575/2534/1949/6279/3553/10875/10673/3133/80149/10892/114548/81704/939/11314/5621/8600/960/10164/301/240/6401/6352/3717/1236/11326/3594/3676/10148/10288/3600/6403/3125/10125/2113/7001/3280/5788/339390/8631/6441/4067/1960/3485/920/6280/5880/2737/54900/4092/2615/340481/10332/64116/8915/3117/64332/6504/8651/7048/71…
BP	GO:0002449	lymphocyte mediated immunity	269	0.548411	3.04405	1e-10	2.98969e-09	1.87907e-09	4752	tags=53%, list=19%, signal=44%	1398/715/730/1604/975/3569/3665/10666/710/695/567/912/3575/3553/3543/3133/3426/925/8417/7133/10892/114548/716/4615/939/5272/8809/713/3594/51279/735/3134/718/3554/3106/1191/3125/10125/714/10538/5788/339390/602/10225/729/3002/3635/114836/84174/4092/4068/8915/3117/3821/6504/708/712/7454/51311/91543/2207/7189/972/729230/56940/3113/11151/11126/57823/3824/5551/8741/722/2013/325/3823/3565/3119/3115/3902…
BP	GO:0006958	complement activation, classical pathway	34	0.790919	3.04194	1e-10	2.98969e-09	1.87907e-09	3446	tags=74%, list=14%, signal=64%	715/730/1604/710/3543/3426/716/713/51279/735/718/1191/714/729/708/712/722/325/4153/1378/10747/733/720/725/721
BP	GO:0002455	humoral immune response mediated by circulating immunoglobulin	47	0.733854	3.03368	1e-10	2.98969e-09	1.87907e-09	3446	tags=66%, list=14%, signal=57%	715/730/1604/975/710/3543/3426/716/713/51279/735/718/1191/714/5788/602/729/708/712/722/325/4153/2213/1378/10747/3263/733/720/725/7124/721
BP	GO:1903037	regulation of leukocyte cell-cell adhesion	309	0.537282	3.02766	1e-10	2.98969e-09	1.87907e-09	4366	tags=49%, list=17%, signal=41%	9314/6347/3037/6363/26191/3572/6366/1604/975/3569/942/5588/6387/3659/567/864/912/3575/2534/1949/3553/10875/10673/3133/80149/10892/114548/81704/939/11314/5621/8600/960/10164/301/240/6401/6352/3717/1236/11326/3594/3676/10148/10288/3600/6403/3125/10125/2113/7001/3280/5788/339390/8631/6441/4067/1960/3485/920/2737/54900/4092/2615/340481/8915/3117/64332/6504/8651/7048/7189/921/972/923/729230/5970/79679…
BP	GO:0042102	positive regulation of T cell proliferation	98	0.630372	3.02238	1e-10	2.98969e-09	1.87907e-09	4366	tags=54%, list=17%, signal=45%	6363/26191/3572/1604/975/3569/942/5588/912/3553/10673/3133/301/6352/3717/3594/10148/10288/3600/3280/5788/3485/6504/7048/7189/923/729230/79679/3113/11151/916/199/160365/3565/3115/84868/80380/959/84433/3593/7535/6850/3965/51561/940/59067/3109/3071/941/3479/2056/11148/8772
BP	GO:0050729	positive regulation of inflammatory response	127	0.600421	3.00494	1e-10	2.98969e-09	1.87907e-09	4330	tags=53%, list=17%, signal=44%	9173/5743/5734/3572/975/3569/353514/695/81030/3949/63940/6279/3553/3133/5054/4889/7099/8600/6283/245928/3717/90865/1236/5336/7132/718/3600/241/2113/5138/120892/59341/6280/834/7098/5294/64332/8717/9180/7097/729230/185/3603/6622/8723/9111/3593/4317/961/5320/1075/6369/81793/51561/940/59067/6348/7124/4818/8692/6845/351/3929/5008/2167/51284/3458
BP	GO:0031341	regulation of cell killing	93	0.636973	3.00474	1e-10	2.98969e-09	1.87907e-09	4685	tags=63%, list=19%, signal=52%	1398/1604/10666/567/912/3575/3133/8417/5272/6372/3594/3134/922/3106/10125/5788/1776/114836/4068/3821/7305/3596/64581/11126/3824/5551/3823/3565/3902/84868/3122/3136/3593/2213/3383/6850/3965/51561/3805/911/59067/913/6688/387837/56253/3684/409/3075/5532/3071/100507436/5599/2208/3458/8772/11035/8302/3822/3140
BP	GO:0002697	regulation of immune effector process	321	0.526996	2.99926	1e-10	2.98969e-09	1.87907e-09	4725	tags=50%, list=19%, signal=41%	1398/6363/26191/1604/975/3569/2/942/11213/10666/710/695/567/912/3575/2220/3553/10875/5322/3133/78989/80149/8417/7133/653361/10892/114548/7099/11314/5272/6372/55601/301/3662/8809/11326/3594/3162/5336/10584/3134/718/3554/8547/922/3106/3125/10125/9188/2294/5788/339390/10225/4067/1776/2268/5880/114836/2219/4092/7043/26057/4068/7098/8915/3821/64332/6504/708/7305/7454/640/91543/7189/3596/972/64581/7292…
BP	GO:0006959	humoral immune response	215	0.548161	2.96541	1e-10	2.98969e-09	1.87907e-09	4380	tags=44%, list=17%, signal=36%	6347/715/730/1604/975/3569/4239/2/710/9547/2220/3553/3543/3133/78989/1675/3426/6039/716/6372/5199/6283/240/713/1236/11326/51279/10584/735/718/8547/10148/922/2920/1191/714/5788/602/729/6441/596/6280/2219/54210/4068/708/712/729230/3078/820/4069/722/325/1667/1668/3119/931/2627/4153/128488/354/2213/1378/4283/2625/5450/9308/10747/6556/940/2919/3263/27242/733/720/725/10406/7124/5699/721/6590/5452/3574/…
BP	GO:0022409	positive regulation of cell-cell adhesion	273	0.533972	2.9555	1e-10	2.98969e-09	1.87907e-09	4366	tags=47%, list=17%, signal=39%	6347/3037/6363/26191/3572/6366/1604/975/3569/3716/942/5588/567/864/912/3575/2534/1949/3553/22915/10673/3133/10892/114548/81704/939/8600/960/10164/301/240/6401/6352/3717/288/1236/3594/5329/3676/10148/10288/3600/6403/3125/10125/2113/4651/3280/5788/8631/4067/1960/3485/920/2737/4092/8915/3117/64332/6504/8651/7048/10272/7189/921/972/923/729230/5970/79679/3113/11151/55423/11126/2736/916/199/5724/160365…
BP	GO:0050778	positive regulation of immune response	458	0.502522	2.95035	1e-10	2.98969e-09	1.87907e-09	4140	tags=46%, list=16%, signal=39%	2357/2358/715/730/6363/26191/3572/1997/1604/975/3569/4239/3665/5359/2/942/5588/5142/10666/710/728/695/3428/81030/567/912/2534/2220/3553/3702/5322/3543/10673/3133/5144/78989/80149/1675/3426/925/8417/10892/114548/7099/716/11314/5621/79037/5199/301/8809/6352/713/1236/11326/3594/973/51279/5583/5336/10584/735/3134/718/3554/2359/89857/8547/922/719/3600/3106/2633/55024/1191/3125/10125/714/5788/8631/729/…
BP	GO:0050870	positive regulation of T cell activation	212	0.549618	2.94628	1e-10	2.98969e-09	1.87907e-09	4366	tags=50%, list=17%, signal=42%	6347/6363/26191/3572/6366/1604/975/3569/942/5588/567/864/912/3575/2534/1949/3553/10673/3133/10892/114548/81704/939/8600/301/6352/3717/1236/3594/10148/10288/3600/3125/10125/3280/5788/4067/1960/3485/920/2737/8915/3117/64332/6504/8651/7048/7189/921/972/923/729230/79679/3113/11151/55423/11126/2736/916/199/160365/1326/3565/3119/3115/84868/3122/80380/959/84433/3593/29851/3111/7535/1378/961/2625/23149/3…
BP	GO:0002269	leukocyte activation involved in inflammatory response	45	0.714675	2.93842	1e-10	2.98969e-09	1.87907e-09	4330	tags=67%, list=17%, signal=55%	2358/3725/3569/728/3949/8530/4615/3717/1191/120892/5788/3459/7098/712/7305/3596/7097/199/6622/3565/4317/1075/3689/6348/7124/3684/472/23208/351/3458
BP	GO:0071706	tumor necrosis factor superfamily cytokine production	155	0.566657	2.9217	1e-10	2.98969e-09	1.87907e-09	4813	tags=52%, list=19%, signal=42%	7538/6363/26191/3569/942/11213/353514/7057/64135/558/3133/4939/80149/7099/4615/5443/245928/4938/3717/90865/5336/706/1191/23547/10125/120892/5788/602/1536/3459/2841/943/2950/914/7098/8915/7096/6774/23643/6504/7305/7097/64581/729230/5724/11027/9590/929/3565/84868/50856/3593/4317/961/5663/8832/945/6850/3965/114900/51561/2621/7128/6348/140885/11006/23405/23208/409/284/64127/3479/351/3929/3458/8772/54…
BP	GO:1903555	regulation of tumor necrosis factor superfamily cytokine production	155	0.566657	2.9217	1e-10	2.98969e-09	1.87907e-09	4813	tags=52%, list=19%, signal=42%	7538/6363/26191/3569/942/11213/353514/7057/64135/558/3133/4939/80149/7099/4615/5443/245928/4938/3717/90865/5336/706/1191/23547/10125/120892/5788/602/1536/3459/2841/943/2950/914/7098/8915/7096/6774/23643/6504/7305/7097/64581/729230/5724/11027/9590/929/3565/84868/50856/3593/4317/961/5663/8832/945/6850/3965/114900/51561/2621/7128/6348/140885/11006/23405/23208/409/284/64127/3479/351/3929/3458/8772/54…
BP	GO:0002704	negative regulation of leukocyte mediated immunity	66	0.65743	2.90129	1e-10	2.98969e-09	1.87907e-09	4200	tags=58%, list=17%, signal=48%	1398/1604/3575/3133/11314/5272/3162/3134/3106/2294/5788/339390/10225/4092/3821/6504/729230/56940/3824/722/84868/2213/1378/8832/3965/3598/684/3805/6688/387837/725/11006/409/64127/3456/5532/3071/100507436
BP	GO:0002237	response to molecule of bacterial origin	308	0.514472	2.89928	1e-10	2.98969e-09	1.87907e-09	3634	tags=43%, list=14%, signal=37%	7538/6347/2353/59307/5743/5732/5734/26191/7056/1604/3569/942/11213/5142/728/22933/133/567/6279/3553/558/80149/5054/654/7133/3164/10892/114548/7099/4615/9450/6372/3587/54658/6401/6352/245928/3717/1236/57088/4091/5336/10288/706/1906/51510/1910/2920/6403/824/7001/2643/128/10225/27063/4067/57817/6280/834/11093/2950/8915/7096/4846/3764/6915/23328/23643/249/7189/23729/3596/7097/923/5970/820/2149/7431/5…
BP	GO:0032640	tumor necrosis factor production	150	0.562612	2.89486	1e-10	2.98969e-09	1.87907e-09	4813	tags=52%, list=19%, signal=42%	7538/6363/26191/3569/11213/353514/7057/64135/558/3133/4939/80149/7099/4615/5443/245928/4938/3717/90865/5336/706/1191/23547/10125/120892/5788/602/1536/3459/2841/943/2950/914/7098/7096/6774/23643/6504/7305/7097/64581/729230/5724/11027/9590/929/3565/84868/50856/3593/4317/961/5663/8832/945/6850/3965/114900/51561/2621/7128/6348/140885/11006/23405/23208/409/284/64127/3479/351/3929/3458/8772/54206/10865…
BP	GO:0032680	regulation of tumor necrosis factor production	150	0.562612	2.89486	1e-10	2.98969e-09	1.87907e-09	4813	tags=52%, list=19%, signal=42%	7538/6363/26191/3569/11213/353514/7057/64135/558/3133/4939/80149/7099/4615/5443/245928/4938/3717/90865/5336/706/1191/23547/10125/120892/5788/602/1536/3459/2841/943/2950/914/7098/7096/6774/23643/6504/7305/7097/64581/729230/5724/11027/9590/929/3565/84868/50856/3593/4317/961/5663/8832/945/6850/3965/114900/51561/2621/7128/6348/140885/11006/23405/23208/409/284/64127/3479/351/3929/3458/8772/54206/10865…
BP	GO:0001774	microglial cell activation	42	0.712601	2.89371	1e-10	2.98969e-09	1.87907e-09	4330	tags=69%, list=17%, signal=57%	2358/3725/3569/728/3949/8530/3717/1191/120892/5788/3459/7098/712/7305/3596/7097/199/6622/3565/4317/1075/3689/6348/7124/3684/472/23208/351/3458
CC	GO:0009897	external side of plasma membrane	350	0.506207	2.89251	1e-10	2.98969e-09	1.87907e-09	4685	tags=46%, list=19%, signal=38%	9173/969/3572/5156/3977/7056/942/10666/6387/7057/9332/567/3949/912/3575/7852/2022/3543/3133/7472/9976/925/79054/7099/939/5621/962/1230/301/6401/1236/3594/973/3676/3134/3554/3680/10148/9936/6403/824/915/5788/339390/355/920/56244/114836/2219/4684/2674/10462/4063/10332/914/84168/2152/3821/10663/2350/6504/7048/51311/4481/9180/2207/3596/928/921/972/64581/5023/923/729230/3560/79679/55576/57823/3824/917…
BP	GO:0001910	regulation of leukocyte mediated cytotoxicity	79	0.629103	2.8899	1e-10	2.98969e-09	1.87907e-09	4685	tags=61%, list=19%, signal=50%	1398/10666/567/912/3575/3133/8417/5272/6372/3594/3134/3106/10125/5788/1776/114836/4068/3821/7305/11126/3824/3823/3902/84868/3122/3136/3593/2213/3383/3965/51561/3805/911/59067/913/6688/387837/56253/3684/409/5532/3071/100507436/8772/11035/8302/3822/3140
BP	GO:0042110	T cell activation	467	0.491163	2.88912	1e-10	2.98969e-09	1.87907e-09	4370	tags=44%, list=17%, signal=37%	6347/1958/5734/6363/26191/3572/6366/1604/975/3569/942/5588/3659/567/864/912/3575/2534/1949/3553/10875/3702/678/10673/3133/80149/639/925/7133/10892/114548/81704/939/11314/5621/8600/960/962/84941/301/3662/6194/8809/6352/3717/1236/11326/3594/10148/10288/3600/3125/10125/677/2934/915/7001/10538/3280/5788/339390/602/6441/4067/1960/3485/920/1794/596/5880/114836/2841/2737/54900/84174/4092/64919/2615/5530…
BP	GO:0002456	T cell mediated immunity	106	0.596132	2.88773	1e-10	2.98969e-09	1.87907e-09	4752	tags=57%, list=19%, signal=46%	1604/975/3569/567/912/3575/3553/3133/925/8417/7133/10892/114548/8809/3594/3134/3554/3106/3125/5788/339390/4092/3821/6504/7454/91543/7189/729230/56940/3824/5551/2013/3565/3122/3136/3593/64005/2213/3383/1178/2625/1075/51561/911/2529/913/11006/5873/64127/3456/5532/23180/3071/100507436/8772/10384/11035/3140/10865/11118
BP	GO:0002429	immune response-activating cell surface receptor signaling pathway	202	0.540356	2.88241	1e-10	2.98969e-09	1.87907e-09	3014	tags=45%, list=12%, signal=40%	2357/2358/26191/1997/975/5359/5142/10666/728/695/2534/3702/3543/5144/80149/925/10892/11314/5621/79037/1236/973/5583/5336/2359/89857/719/2633/55024/3125/5788/8631/4067/56244/596/3635/2268/2219/54900/84174/4068/50852/8915/9404/64332/7305/3937/919/640/2207/7189/64581/5970/79679/56940/11126/2854/3824/7294/7805/11027/3958/3823/3119/931/3115/4153/84433/660/84106/64005/3783/114625/2213/7535/1378/961/433…
BP	GO:0002757	immune response-activating signal transduction	202	0.540356	2.88241	1e-10	2.98969e-09	1.87907e-09	3014	tags=45%, list=12%, signal=40%	2357/2358/26191/1997/975/5359/5142/10666/728/695/2534/3702/3543/5144/80149/925/10892/11314/5621/79037/1236/973/5583/5336/2359/89857/719/2633/55024/3125/5788/8631/4067/56244/596/3635/2268/2219/54900/84174/4068/50852/8915/9404/64332/7305/3937/919/640/2207/7189/64581/5970/79679/56940/11126/2854/3824/7294/7805/11027/3958/3823/3119/931/3115/4153/84433/660/84106/64005/3783/114625/2213/7535/1378/961/433…
BP	GO:0002703	regulation of leukocyte mediated immunity	216	0.532354	2.87881	1e-10	2.98969e-09	1.87907e-09	5128	tags=54%, list=20%, signal=43%	1398/1604/975/3569/10666/695/567/912/3575/3553/3133/8417/7133/10892/114548/7099/11314/5272/6372/8809/3594/3162/5336/3134/718/3554/3106/3125/10125/9188/2294/5788/339390/10225/4067/1776/2268/5880/114836/4092/4068/7098/3821/6504/7305/7454/640/91543/7189/3596/64581/729230/56940/11126/3824/8741/5724/722/8723/3823/3565/3902/84868/3122/3136/3593/84106/2213/3383/1378/1178/2625/23529/8832/6850/3965/3598/5…
BP	GO:0046631	alpha-beta T cell activation	144	0.566011	2.8778	1e-10	2.98969e-09	1.87907e-09	3465	tags=51%, list=14%, signal=44%	5734/6363/26191/1604/975/3569/942/5588/3659/864/3702/3133/80149/639/10892/114548/11314/301/3662/8809/3717/3594/10148/3600/3125/10538/5788/602/1794/596/114836/2841/2737/4092/64919/4063/8320/6774/64332/8651/7048/91543/729230/11126/916/64218/57089/3565/159296/3122/50856/3593/7535/57045/2625/9308/6850/3965/149041/51561/940/6095/944/2529/59067/84807/3142/865/6146/11006/3707/56253/4818
BP	GO:0050867	positive regulation of cell activation	331	0.504409	2.87476	1e-10	2.98969e-09	1.87907e-09	4366	tags=46%, list=17%, signal=38%	6347/9173/6363/26191/3572/6366/1604/975/3569/942/5588/10666/353514/695/7057/567/864/912/3575/2534/1949/3553/3543/10673/558/3133/10892/114548/7099/4615/81704/939/8600/301/6352/3717/90865/1236/3594/3134/10148/10288/3600/6403/3125/10125/120892/3280/5788/4067/1960/3485/57817/920/596/3635/2268/2737/914/8915/3117/64332/6504/8651/7305/7048/3601/7189/3596/921/972/64581/923/729230/79679/3113/11151/55423/1…
BP	GO:0071346	cellular response to interferon-gamma	113	0.582635	2.87328	1e-10	2.98969e-09	1.87907e-09	4330	tags=53%, list=17%, signal=44%	55647/6347/6363/6366/3716/4609/3659/9482/7099/6352/3717/3594/6368/1906/2633/388372/2934/834/11093/7098/8651/7454/10435/115362/10096/414062/7097/3113/199/7294/7431/163351/115361/9111/965/3593/6349/6359/961/3394/6814/3965/6369/3055/9341/23521/998/7376/338382/3263/6348/140885/7124/6772/6362/4641/388646/71/6367/3458
BP	GO:0002768	immune response-regulating cell surface receptor signaling pathway	229	0.529303	2.87002	1e-10	2.98969e-09	1.87907e-09	3014	tags=43%, list=12%, signal=38%	2357/2358/26191/1997/975/5359/5588/5142/10666/728/695/2534/3702/3543/5144/80149/925/10892/11314/5621/79037/1236/973/5583/5336/2359/89857/10288/719/2633/55024/23547/3125/5788/8631/4067/56244/596/3635/2268/2219/54900/84174/5609/4068/50852/8915/3821/9404/64332/7305/3937/919/640/2207/7189/6416/64581/5970/79679/56940/11126/2854/3824/7294/7805/11027/3958/3823/3119/5602/931/3115/4153/84433/660/84106/640…
BP	GO:0070665	positive regulation of leukocyte proliferation	149	0.557356	2.86958	1e-10	2.98969e-09	1.87907e-09	4366	tags=47%, list=17%, signal=39%	6363/26191/3572/1604/975/3569/942/5588/912/3553/10673/3133/1436/7099/4615/301/6352/3717/3594/10148/10288/3600/3280/5788/4067/3485/596/6504/7048/7189/3596/972/923/729230/79679/3113/11151/916/199/160365/3565/3115/84868/80380/959/84433/3593/7535/23529/6850/3965/3568/51561/684/940/5741/115352/59067/57162/3109/3574/952/3071/941/3479/2056/4352/11148/683/8772
BP	GO:0050853	B cell receptor signaling pathway	50	0.687993	2.8674	1e-10	2.98969e-09	1.87907e-09	4072	tags=58%, list=16%, signal=49%	26191/975/695/3702/3543/11314/973/5583/5336/89857/55024/5788/4067/596/9404/640/931/660/2213/4332/6850/1493/115352/974/5293/952/3932/23180/3071
BP	GO:0050854	regulation of antigen receptor-mediated signaling pathway	55	0.669361	2.86639	1e-10	2.98969e-09	1.87907e-09	3928	tags=58%, list=16%, signal=49%	26191/1997/975/10666/10892/11314/5621/79037/1236/5583/2633/5788/4067/84174/4068/50852/8915/9404/640/5970/56940/11126/7805/3958/84433/3783/2213/149041/115352/11006/3932/868
BP	GO:1903557	positive regulation of tumor necrosis factor superfamily cytokine production	99	0.595362	2.86315	1e-10	2.98969e-09	1.87907e-09	2773	tags=44%, list=11%, signal=40%	6363/3569/942/353514/7057/64135/3133/4939/7099/4615/4938/3717/90865/5336/1191/10125/120892/5788/1536/3459/943/914/7098/8915/7096/6774/23643/7305/7097/64581/729230/5724/11027/9590/929/84868/3593/4317/5663/8832/6850/3965/114900/51561
BP	GO:0032496	response to lipopolysaccharide	293	0.510923	2.86186	1e-10	2.98969e-09	1.87907e-09	3634	tags=42%, list=14%, signal=37%	7538/6347/2353/59307/5743/5732/5734/26191/7056/1604/3569/942/11213/5142/133/6279/3553/558/80149/5054/654/7133/3164/10892/114548/7099/4615/9450/6372/3587/54658/6401/6352/245928/3717/1236/57088/4091/5336/10288/706/1906/51510/1910/2920/6403/824/7001/2643/128/10225/27063/4067/57817/6280/834/11093/2950/8915/4846/3764/6915/23328/23643/249/7189/23729/3596/7097/923/5970/820/2149/7431/5724/6622/11027/9590…
BP	GO:0050851	antigen receptor-mediated signaling pathway	152	0.554503	2.86178	1e-10	2.98969e-09	1.87907e-09	4072	tags=51%, list=16%, signal=43%	26191/1997/975/5142/10666/695/2534/3702/3543/5144/80149/925/10892/11314/5621/79037/1236/973/5583/5336/89857/2633/55024/3125/5788/8631/4067/56244/596/3635/54900/84174/4068/50852/8915/9404/64332/3937/919/640/7189/5970/79679/56940/11126/7294/7805/3958/3119/931/3115/84433/660/84106/3783/114625/2213/7535/4332/2625/5663/23149/6850/149041/940/1493/115352/84807/51324/27242/11006/974/5293/952/3932/868/231…
BP	GO:0050671	positive regulation of lymphocyte proliferation	135	0.566172	2.86141	1e-10	2.98969e-09	1.87907e-09	4366	tags=48%, list=17%, signal=40%	6363/26191/3572/1604/975/3569/942/5588/912/3553/10673/3133/7099/4615/301/6352/3717/3594/10148/10288/3600/3280/5788/3485/596/6504/7048/7189/3596/972/923/729230/79679/3113/11151/916/199/160365/3565/3115/84868/80380/959/84433/3593/7535/23529/6850/3965/51561/940/115352/59067/57162/3109/3574/952/3071/941/3479/2056/4352/11148/683/8772
BP	GO:0034341	response to interferon-gamma	134	0.563866	2.85072	1e-10	2.98969e-09	1.87907e-09	4363	tags=51%, list=17%, signal=43%	55647/6347/6363/6366/3716/4609/3659/9482/7099/6352/3717/3594/8519/6368/1906/2633/388372/8942/2934/2643/834/11093/7098/8651/7454/10435/115362/10096/414062/972/7097/3113/199/7294/7431/163351/6622/115361/9111/965/3593/6349/6359/961/3394/6814/3965/6369/3055/9341/6556/684/23521/998/7376/338382/3263/10241/6348/140885/7124/6772/6362/4641/388646/71/6367/3458/6737
BP	GO:0031343	positive regulation of cell killing	60	0.651758	2.84432	1e-10	2.98969e-09	1.87907e-09	4685	tags=63%, list=19%, signal=52%	10666/567/912/3133/8417/3594/3134/922/3106/10125/5788/114836/4068/7305/64581/11126/3824/5551/3823/3902/3122/3136/3593/6850/51561/911/59067/913/6688/56253/3684/5599/2208/3458/8772/8302/3822/3140
BP	GO:0042098	T cell proliferation	190	0.533233	2.83771	1e-10	2.98969e-09	1.87907e-09	4453	tags=47%, list=18%, signal=39%	6363/26191/3572/1604/975/3569/942/5588/3659/912/2534/3553/10673/3133/7133/10892/81704/5621/301/6194/6352/3717/11326/3594/10148/10288/3600/10125/7001/3280/5788/339390/6441/3485/1794/5880/2615/5294/6504/7048/7189/923/729230/79679/3113/11151/916/199/160365/54361/3958/3565/3115/84868/80380/959/84433/3593/896/7535/1378/57045/1178/6850/3965/977/149041/6556/51561/940/1493/944/59067/27242/57162/11006/569…
BP	GO:0070663	regulation of leukocyte proliferation	235	0.515924	2.83639	1e-10	2.98969e-09	1.87907e-09	4453	tags=45%, list=18%, signal=37%	6363/26191/3572/1604/975/3569/942/5588/3659/695/912/3553/10673/3133/1436/7133/7099/4615/11314/5621/301/6352/3717/90865/11326/3594/10148/10288/3600/3280/5788/339390/6441/4067/3485/596/3635/7940/5880/2615/2950/23495/6504/7305/7048/640/7189/3596/972/923/729230/79679/3113/11151/916/199/160365/3958/3565/3115/84868/80380/959/84433/3593/2213/7535/1378/22806/57045/4332/1178/23529/6850/3965/3568/149041/51…
BP	GO:0002696	positive regulation of leukocyte activation	319	0.501419	2.83185	1e-10	2.98969e-09	1.87907e-09	4366	tags=46%, list=17%, signal=38%	6347/9173/6363/26191/3572/6366/1604/975/3569/942/5588/10666/695/7057/567/864/912/3575/2534/1949/3553/3543/10673/558/3133/10892/114548/7099/4615/81704/939/8600/301/6352/3717/90865/1236/3594/3134/10148/10288/3600/3125/10125/120892/3280/5788/4067/1960/3485/57817/920/596/3635/2268/2737/914/8915/3117/64332/6504/8651/7305/7048/3601/7189/3596/921/972/64581/923/729230/79679/3113/11151/55423/11126/2736/91…
BP	GO:0032946	positive regulation of mononuclear cell proliferation	137	0.557882	2.82906	1e-10	2.98969e-09	1.87907e-09	4366	tags=47%, list=17%, signal=39%	6363/26191/3572/1604/975/3569/942/5588/912/3553/10673/3133/7099/4615/301/6352/3717/3594/10148/10288/3600/3280/5788/3485/596/6504/7048/7189/3596/972/923/729230/79679/3113/11151/916/199/160365/3565/3115/84868/80380/959/84433/3593/7535/23529/6850/3965/51561/940/115352/59067/57162/3109/3574/952/3071/941/3479/2056/4352/11148/683/8772
BP	GO:0001909	leukocyte mediated cytotoxicity	117	0.570147	2.8253	1e-10	2.98969e-09	1.87907e-09	4727	tags=54%, list=19%, signal=44%	1398/10666/567/912/3575/3133/8417/4615/5272/6372/3594/3134/3106/10125/5788/3002/1776/114836/54210/4068/3821/7305/11151/11126/57823/3824/5551/2013/3823/3902/84868/3122/3136/3593/2213/3383/3965/1075/51561/3805/911/59067/913/201294/6688/387837/79465/56253/4818/3684/5873/409/5532/6845/3071/100507436/2209/8772/11035/8302/3822/3140/55207
BP	GO:0001906	cell killing	164	0.547225	2.8222	1e-10	2.98969e-09	1.87907e-09	4727	tags=51%, list=19%, signal=41%	1398/1604/10666/567/912/3575/3133/8417/4615/5272/6372/6283/3594/735/3134/718/922/3106/10125/5788/57817/3002/1776/114836/54210/4068/3821/245939/7305/3596/64581/11151/11126/57823/3824/5551/4069/2013/3823/1667/1668/3565/3902/84868/3122/3136/3593/2213/3383/6850/3965/1075/51561/3805/911/59067/913/201294/6688/387837/79465/56253/4818/3684/5873/409/3075/5532/1669/6845/3071/100507436/2209/5599/2208/3458/8…
BP	GO:0002709	regulation of T cell mediated immunity	86	0.59826	2.81921	1e-10	2.98969e-09	1.87907e-09	4702	tags=57%, list=19%, signal=46%	1604/975/3569/567/912/3575/3553/3133/8417/7133/10892/114548/8809/3594/3134/3554/3106/3125/5788/339390/4092/3821/6504/7454/91543/7189/729230/56940/3824/3565/3122/3136/3593/2213/1178/2625/51561/911/2529/913/11006/64127/3456/5532/3071/8772/11035/3140/10865
BP	GO:0002819	regulation of adaptive immune response	175	0.537561	2.81919	1e-10	2.98969e-09	1.87907e-09	3338	tags=42%, list=13%, signal=37%	9173/6363/3572/64092/1604/975/3569/3665/5588/10666/3659/695/567/912/3575/3553/10673/3133/80149/8417/7133/10892/114548/962/301/8809/3594/3134/718/3554/3106/3125/5788/339390/8631/920/4092/3821/64332/6504/7454/91543/7189/64581/729230/56940/11126/3824/8741/722/3565/84868/3122/3136/3593/2213/1378/1178/2625/23529/149041/6556/51561/940/911/2529/84807/913/3263/3142/7128/725/7124/11006
BP	GO:0050863	regulation of T cell activation	315	0.497373	2.81901	1e-10	2.98969e-09	1.87907e-09	4366	tags=45%, list=17%, signal=38%	6347/6363/26191/3572/6366/1604/975/3569/942/5588/3659/567/864/912/3575/2534/1949/3553/10875/10673/3133/80149/639/7133/10892/114548/81704/939/11314/5621/8600/301/3662/6352/3717/1236/11326/3594/10148/10288/3600/3125/10125/7001/3280/5788/339390/6441/4067/1960/3485/920/5880/2737/54900/4092/2615/914/8915/3117/64332/6504/8651/7048/7189/921/972/923/729230/79679/56940/3113/11151/55423/11126/2736/916/199/…
BP	GO:0046651	lymphocyte proliferation	277	0.504334	2.81317	1e-10	2.98969e-09	1.87907e-09	4370	tags=43%, list=17%, signal=36%	6363/26191/3572/1604/975/3569/942/5588/3659/695/912/3575/2534/3553/10673/3133/7133/10892/7099/4615/81704/11314/5621/301/6194/6352/3717/11326/3594/973/10148/10288/3600/10125/7001/3280/5788/339390/6441/4067/3485/1794/596/3635/7940/5880/2615/23495/5294/6504/7305/7048/640/7189/3596/972/923/729230/79679/3113/11151/916/199/160365/54361/3958/3565/931/3115/84868/80380/959/84433/3593/2322/896/2213/7535/13…
BP	GO:0050670	regulation of lymphocyte proliferation	214	0.524207	2.81114	1e-10	2.98969e-09	1.87907e-09	4453	tags=46%, list=18%, signal=38%	6363/26191/3572/1604/975/3569/942/5588/3659/695/912/3553/10673/3133/7133/7099/4615/11314/5621/301/6352/3717/11326/3594/10148/10288/3600/3280/5788/339390/6441/4067/3485/596/3635/7940/5880/2615/23495/6504/7305/7048/640/7189/3596/972/923/729230/79679/3113/11151/916/199/160365/3958/3565/3115/84868/80380/959/84433/3593/2213/7535/1378/22806/57045/4332/1178/23529/6850/3965/149041/51561/940/1493/944/1153…
BP	GO:0032635	interleukin-6 production	131	0.556462	2.80569	1e-10	2.98969e-09	1.87907e-09	4982	tags=52%, list=20%, signal=42%	26191/3569/11213/353514/64135/10365/3553/80149/7099/4615/90865/5336/10288/3106/55024/3556/824/59341/3635/7098/8915/7096/6774/6504/7305/51311/7189/972/7097/64581/2149/199/5724/3603/11027/84868/4317/961/8832/5450/6850/3965/114900/338382/2621/7128/3082/140885/7124/11006/5452/8692/23208/409/64127/3071/84632/351/3929/51284/3458/10865/64170/91662/148022/10333/23765/1535
BP	GO:0032675	regulation of interleukin-6 production	131	0.556462	2.80569	1e-10	2.98969e-09	1.87907e-09	4982	tags=52%, list=20%, signal=42%	26191/3569/11213/353514/64135/10365/3553/80149/7099/4615/90865/5336/10288/3106/55024/3556/824/59341/3635/7098/8915/7096/6774/6504/7305/51311/7189/972/7097/64581/2149/199/5724/3603/11027/84868/4317/961/8832/5450/6850/3965/114900/338382/2621/7128/3082/140885/7124/11006/5452/8692/23208/409/64127/3071/84632/351/3929/51284/3458/10865/64170/91662/148022/10333/23765/1535
BP	GO:0070661	leukocyte proliferation	308	0.497726	2.80491	1e-10	2.98969e-09	1.87907e-09	4370	tags=42%, list=17%, signal=35%	6363/26191/3572/1604/975/3569/942/5588/3659/695/912/3575/2534/3553/10673/3133/1436/7133/10892/7099/4615/81704/11314/5621/8600/301/6194/6352/3717/90865/11326/3594/973/10148/10288/3600/1191/10125/7001/3280/5788/339390/6441/4067/3485/1794/596/3635/7940/5880/2615/2950/23495/5294/6504/7305/7048/640/7189/3596/972/923/729230/79679/3113/11151/4883/916/199/160365/54361/3958/3565/931/3115/84868/80380/959/8…
BP	GO:0051251	positive regulation of lymphocyte activation	278	0.501374	2.79845	1e-10	2.98969e-09	1.87907e-09	4366	tags=46%, list=17%, signal=38%	6347/6363/26191/3572/6366/1604/975/3569/942/5588/695/567/864/912/3575/2534/1949/3553/3543/10673/558/3133/10892/114548/7099/4615/81704/939/8600/301/6352/3717/1236/3594/3134/10148/10288/3600/3125/10125/3280/5788/4067/1960/3485/920/596/3635/2737/8915/3117/64332/6504/8651/7305/7048/3601/7189/3596/921/972/64581/923/729230/79679/3113/11151/55423/11126/2736/916/199/8741/160365/1326/3565/3119/3115/84868/…
BP	GO:0002699	positive regulation of immune effector process	223	0.512702	2.79524	1e-10	2.98969e-09	1.87907e-09	4725	tags=49%, list=19%, signal=40%	6363/26191/1604/975/3569/942/10666/695/567/912/2220/3553/5322/3133/78989/8417/10892/114548/7099/11314/55601/301/8809/3594/3162/5336/10584/3134/718/3554/8547/3106/3125/10125/9188/2294/5788/4067/2268/5880/114836/2219/26057/4068/8915/64332/6504/7305/640/91543/7189/3596/972/64581/729230/11126/11331/3824/8741/5724/7805/8723/3823/3565/3902/4153/3122/3136/3593/354/1378/2625/23529/8832/6850/3965/3598/515…
BP	GO:0002694	regulation of leukocyte activation	498	0.472667	2.7916	1e-10	2.98969e-09	1.87907e-09	4366	tags=43%, list=17%, signal=36%	6347/9173/6363/26191/3572/6366/64092/1604/975/3569/5359/942/5588/10666/3659/3398/695/7057/567/3949/864/912/3575/2534/1949/3553/10875/678/3543/10673/558/3133/80149/639/7133/8530/10892/114548/7099/4615/81704/939/11314/5621/8600/301/3662/6352/3717/90865/1236/11326/3594/6422/3162/3134/10148/10288/3600/55024/3125/10125/677/120892/7001/2294/3280/5788/339390/6441/4067/374403/1960/3485/57817/920/596/3635…
BP	GO:0097028	dendritic cell differentiation	45	0.678322	2.78895	1e-10	2.98969e-09	1.87907e-09	3174	tags=56%, list=13%, signal=49%	6363/558/55509/3662/1236/10288/3106/10538/4067/7048/640/7189/3565/2322/28959/2213/4055/3394/5663/3965/116071/3694/6688/55365/2621
BP	GO:0002764	immune response-regulating signaling pathway	361	0.48783	2.78815	1e-10	2.98969e-09	1.87907e-09	5128	tags=49%, list=20%, signal=40%	2357/2358/26191/1997/975/3665/5359/11213/5588/5142/10666/728/3659/695/64135/2534/3702/3543/5144/80149/925/10892/7099/4615/57142/11314/5621/54941/79037/55601/3662/1540/4938/1236/973/2099/5583/5336/2359/89857/10288/719/2633/55024/1520/118788/23547/3125/5788/8631/4067/56244/596/3635/2268/2219/54900/84174/26057/5609/4068/50852/7098/8915/7096/3821/9404/84282/64332/23643/708/7305/3937/919/51311/640/915…
BP	GO:0001819	positive regulation of cytokine production	430	0.482057	2.78677	1e-10	2.98969e-09	1.87907e-09	5012	tags=47%, list=20%, signal=38%	1958/9173/5743/5734/6363/26191/3572/1604/975/3569/3665/942/11213/5588/5142/10666/353514/728/3659/3428/3091/7057/64135/567/63940/3553/3702/3133/4939/5144/5054/1436/2658/10892/114548/7099/4615/301/3662/8809/4938/3717/90865/1236/3594/3357/3162/5336/3134/718/3554/4060/10148/10288/719/3600/1545/3556/1191/10125/120892/9188/10538/5788/602/1536/920/59341/3459/1116/2268/834/114836/2219/149628/283420/943/6…
BP	GO:0002698	negative regulation of immune effector process	109	0.571501	2.78566	1e-10	2.98969e-09	1.87907e-09	4200	tags=50%, list=17%, signal=41%	1398/1604/2/11213/710/3575/10875/3133/80149/11314/5272/301/11326/3162/3134/3106/2294/5788/339390/10225/4092/7043/3821/6504/729230/56940/3824/722/3958/3565/84868/2213/1378/961/8832/3965/3598/149041/684/3805/115352/6688/3142/387837/725/7124/11006/409/284/64127/3456/5532/3071/100507436
BP	GO:0032944	regulation of mononuclear cell proliferation	217	0.517884	2.78463	1e-10	2.98969e-09	1.87907e-09	4453	tags=45%, list=18%, signal=37%	6363/26191/3572/1604/975/3569/942/5588/3659/695/912/3553/10673/3133/7133/7099/4615/11314/5621/301/6352/3717/11326/3594/10148/10288/3600/3280/5788/339390/6441/4067/3485/596/3635/7940/5880/2615/23495/6504/7305/7048/640/7189/3596/972/923/729230/79679/3113/11151/916/199/160365/3958/3565/3115/84868/80380/959/84433/3593/2213/7535/1378/22806/57045/4332/1178/23529/6850/3965/149041/51561/940/1493/944/1153…
BP	GO:0032943	mononuclear cell proliferation	281	0.498868	2.77943	1e-10	2.98969e-09	1.87907e-09	4370	tags=42%, list=17%, signal=35%	6363/26191/3572/1604/975/3569/942/5588/3659/695/912/3575/2534/3553/10673/3133/7133/10892/7099/4615/81704/11314/5621/301/6194/6352/3717/11326/3594/973/10148/10288/3600/10125/7001/3280/5788/339390/6441/4067/3485/1794/596/3635/7940/5880/2615/23495/5294/6504/7305/7048/640/7189/3596/972/923/729230/79679/3113/11151/916/199/160365/54361/3958/3565/931/3115/84868/80380/959/84433/3593/2322/896/2213/7535/13…
BP	GO:0071219	cellular response to molecule of bacterial origin	194	0.525508	2.77811	1e-10	2.98969e-09	1.87907e-09	3634	tags=46%, list=14%, signal=40%	7538/6347/59307/26191/1604/3569/942/5142/22933/3553/558/80149/5054/654/7133/10892/114548/7099/4615/9450/6372/6352/245928/3717/57088/5336/10288/706/51510/1910/2920/824/7001/27063/4067/57817/834/11093/2950/8915/7096/4846/6915/23328/23643/7189/23729/7097/923/5970/820/7431/5724/11027/57048/929/1667/1668/84868/5606/80380/3593/85363/9373/2213/4283/3394/22904/3055/2672/8564/8754/9516/2919/10594/6688/199…
BP	GO:0032760	positive regulation of tumor necrosis factor production	95	0.587135	2.77461	1e-10	2.98969e-09	1.87907e-09	5064	tags=56%, list=20%, signal=45%	6363/3569/353514/7057/64135/3133/4939/7099/4615/4938/3717/90865/5336/1191/10125/120892/5788/1536/3459/943/914/7098/7096/6774/23643/7305/7097/64581/729230/5724/11027/9590/929/84868/3593/4317/5663/8832/6850/3965/114900/51561/6348/64127/351/3929/3458/8772/10865/64170/148022/1535/5196
BP	GO:0022407	regulation of cell-cell adhesion	409	0.481995	2.77382	1e-10	2.98969e-09	1.87907e-09	4366	tags=43%, list=17%, signal=36%	9314/6347/3037/6363/114897/26191/3572/6366/1604/975/3569/3716/942/5588/6387/3659/567/864/912/3575/2534/1949/3553/10875/22915/10673/3133/80149/654/10892/114548/91663/81704/939/11314/5621/8600/960/10164/301/240/6401/6352/3717/288/1236/11326/3594/5329/3676/10148/10288/3600/6403/3125/10125/2113/4651/7001/3280/5788/339390/8631/6441/4067/1960/3485/920/59341/2737/54900/4092/2615/340481/8915/3117/64332/6…
BP	GO:0097529	myeloid leukocyte migration	205	0.515037	2.77254	1e-10	2.98969e-09	1.87907e-09	5123	tags=50%, list=20%, signal=40%	6347/2358/5734/6363/6366/975/3569/5142/6387/728/7057/64805/6279/3553/5054/1436/4615/11314/8600/6372/1230/6283/301/6352/1236/11117/6368/3554/3680/719/1906/1910/2920/388372/6441/4067/59341/6280/5880/6288/54210/9353/5294/6504/708/255231/2207/391/414062/928/972/729230/199/80310/3958/3565/5175/4920/6349/5641/6359/4283/961/6850/1240/8288/6369/4354/51561/2919/2529/796/3689/2185/6688/245937/4681/6348/144…
BP	GO:0050727	regulation of inflammatory response	318	0.489279	2.7699	1e-10	2.98969e-09	1.87907e-09	4341	tags=43%, list=17%, signal=36%	7538/9021/9314/2358/9173/284207/5743/5734/3572/64838/975/3569/837/353514/695/81030/3949/7010/2534/63940/6279/3553/3133/5054/4889/7133/653361/8530/114548/7099/4615/8600/6283/301/240/6401/6352/245928/1540/3717/90865/1236/2099/5336/7132/718/3554/3600/1910/241/118788/2113/5138/120892/313/2294/5788/4067/57817/1776/59341/6280/2268/834/6288/2950/7098/5294/89790/64332/8717/5740/9180/116379/23729/3596/709…
BP	GO:0071222	cellular response to lipopolysaccharide	186	0.523649	2.7661	1e-10	2.98969e-09	1.87907e-09	3634	tags=46%, list=14%, signal=39%	7538/6347/59307/26191/1604/3569/942/5142/3553/558/80149/5054/654/7133/10892/114548/7099/4615/9450/6372/6352/245928/3717/57088/5336/10288/706/51510/1910/2920/824/7001/27063/4067/57817/834/11093/2950/8915/4846/6915/23328/23643/7189/23729/7097/923/5970/820/7431/5724/11027/57048/929/1667/1668/84868/5606/80380/3593/85363/9373/4283/3394/22904/3055/2672/8564/8754/9516/2919/10594/6688/199713/7128/4790/63…
BP	GO:0042129	regulation of T cell proliferation	161	0.536169	2.76345	1e-10	2.98969e-09	1.87907e-09	4453	tags=47%, list=18%, signal=39%	6363/26191/3572/1604/975/3569/942/5588/3659/912/3553/10673/3133/7133/5621/301/6352/3717/11326/3594/10148/10288/3600/3280/5788/339390/6441/3485/5880/2615/6504/7048/7189/923/729230/79679/3113/11151/916/199/160365/3958/3565/3115/84868/80380/959/84433/3593/7535/1378/57045/1178/6850/3965/149041/51561/940/1493/944/59067/27242/57162/11006/56253/3109/868/8379/3071/941/3479/2056/11148/8772/11035
BP	GO:0000070	mitotic sister chromatid segregation	142	-0.612334	-2.76191	1e-10	2.98969e-09	1.87907e-09	3046	tags=49%, list=12%, signal=44%	51434/55055/5518/23310/25836/27127/8658/25936/81930/8243/3837/286053/23126/10726/27436/11130/3192/4751/9918/9319/7756/9928/79980/51433/11004/10615/55755/4085/83540/699/51529/9232/26271/54892/9031/9700/10051/1062/27175/7272/24137/10592/29127/26993/891/991/990/81620/9493/64105/29945/113130/1063/9212/146909/64151/10403/10460/7283/51203/9735/29781/55143/7517/3833/9055/11065/84861/8697/23244
BP	GO:0061900	glial cell activation	48	0.663074	2.7611	1e-10	2.98969e-09	1.87907e-09	4330	tags=65%, list=17%, signal=54%	2358/3725/3569/728/3949/3553/8530/3717/1191/120892/5788/3459/7098/712/7305/3596/7097/199/6622/3565/4317/5663/1075/3689/6348/7124/3684/472/23208/351/3458
BP	GO:0042116	macrophage activation	95	0.584063	2.7601	1e-10	2.98969e-09	1.87907e-09	4330	tags=54%, list=17%, signal=45%	2358/9173/3725/3569/728/7057/3949/80149/8530/7099/3717/90865/11326/5336/1191/120892/5788/57817/3459/7098/7096/712/7305/23729/3596/972/7097/199/6622/9111/3565/84868/7107/4317/2213/3727/8832/6850/22904/1075/6556/6095/3689/6348/7124/3684/472/23208/351/3929/3458
BP	GO:0002718	regulation of cytokine production involved in immune response	92	0.58553	2.75414	1e-10	2.98969e-09	1.87907e-09	3860	tags=49%, list=15%, signal=42%	1604/975/3569/11213/10666/695/567/3553/3133/7133/10892/114548/7099/8809/3162/5336/3134/3554/9188/10225/4092/7043/7098/8915/6504/91543/7189/972/64581/729230/11126/7805/3565/1178/2625/684/3805/170506/3098/7124/11006/9474/284/64127/3456
BP	GO:0002367	cytokine production involved in immune response	94	0.584093	2.75288	1e-10	2.98969e-09	1.87907e-09	3860	tags=49%, list=15%, signal=42%	1604/975/3569/11213/10666/695/567/3553/3133/7133/10892/114548/7099/8809/3162/5336/3134/3554/9188/10225/4092/7043/54210/7098/8915/6504/91543/7189/972/64581/729230/11126/7805/3565/1178/2625/684/3805/170506/3098/7124/11006/9474/284/64127/3456
BP	GO:0002707	negative regulation of lymphocyte mediated immunity	54	0.646203	2.74837	1e-10	2.98969e-09	1.87907e-09	4200	tags=56%, list=17%, signal=46%	1398/1604/3575/3133/5272/3134/3106/5788/339390/10225/4092/3821/6504/56940/3824/722/84868/2213/1378/3965/3805/387837/725/11006/409/64127/3456/5532/3071/100507436
BP	GO:0150076	neuroinflammatory response	63	0.628952	2.74829	1e-10	2.98969e-09	1.87907e-09	4330	tags=60%, list=17%, signal=50%	2358/5743/3725/3569/728/3949/3553/7133/8530/3717/90865/5336/1191/120892/5788/3459/7098/712/7305/3596/7097/199/6622/3565/4317/5663/1075/107/3689/6348/7124/3684/472/23208/4314/3479/351/3458
BP	GO:0035710	CD4-positive, alpha-beta T cell activation	92	0.58255	2.74012	1e-10	2.98969e-09	1.87907e-09	3113	tags=49%, list=12%, signal=43%	5734/6363/1604/975/3569/942/5588/864/80149/10892/114548/301/3662/8809/3594/3125/10538/602/114836/4092/4063/6774/64332/8651/7048/91543/11126/64218/57089/3565/159296/3122/3593/57045/2625/9308/3965/149041/51561/6095/2529/59067/84807/3142/865
BP	GO:0032609	interferon-gamma production	107	0.561612	2.73653	1e-10	2.98969e-09	1.87907e-09	3439	tags=47%, list=14%, signal=41%	9173/26191/5142/10666/3553/558/5144/80149/7099/5621/8809/3717/1236/3594/3554/10148/10125/602/10225/114836/914/7098/6504/708/51311/64581/729230/3113/11126/916/7294/7805/929/3115/84868/80380/3593/1378/961/3394/2625/3965/6556/51561/59067/2621/140885/7124/11006/56253
BP	GO:0032649	regulation of interferon-gamma production	107	0.561612	2.73653	1e-10	2.98969e-09	1.87907e-09	3439	tags=47%, list=14%, signal=41%	9173/26191/5142/10666/3553/558/5144/80149/7099/5621/8809/3717/1236/3594/3554/10148/10125/602/10225/114836/914/7098/6504/708/51311/64581/729230/3113/11126/916/7294/7805/929/3115/84868/80380/3593/1378/961/3394/2625/3965/6556/51561/59067/2621/140885/7124/11006/56253
MF	GO:0019955	cytokine binding	126	0.544961	2.73298	1e-10	2.98969e-09	1.87907e-09	3534	tags=44%, list=14%, signal=38%	7538/9173/3572/3977/2/7057/7852/2022/1436/7133/3587/1230/8809/1236/3594/7850/3676/7132/3554/10148/2633/8425/920/3459/7043/2615/659/2247/10663/7837/7048/9180/116379/972/729230/3560/3557/8828/7049/643/2833/3561/3593/25987/10803/57045/94/3568/3598/1233/199713/4681/1441/64388/8692
BP	GO:0032612	interleukin-1 production	99	0.568099	2.73205	1e-10	2.98969e-09	1.87907e-09	4861	tags=53%, list=19%, signal=43%	1958/6363/3569/353514/3428/80149/10892/114548/7099/4615/301/3717/1236/1992/7850/834/149628/6288/2950/6774/7305/51311/10972/115362/64581/2149/3603/11027/84868/841/9447/4332/945/3965/24145/199713/2621/7128/6348/3098/140885/7124/11006/6284/409/64127/3479/351/3458/54206/91662/10333
BP	GO:0032652	regulation of interleukin-1 production	99	0.568099	2.73205	1e-10	2.98969e-09	1.87907e-09	4861	tags=53%, list=19%, signal=43%	1958/6363/3569/353514/3428/80149/10892/114548/7099/4615/301/3717/1236/1992/7850/834/149628/6288/2950/6774/7305/51311/10972/115362/64581/2149/3603/11027/84868/841/9447/4332/945/3965/24145/199713/2621/7128/6348/3098/140885/7124/11006/6284/409/64127/3479/351/3458/54206/91662/10333
BP	GO:0002822	regulation of adaptive immune response based on somatic recombination of immune receptors built from immunoglobulin superfamily domains	160	0.527723	2.72553	1e-10	2.98969e-09	1.87907e-09	5128	tags=51%, list=20%, signal=41%	9173/6363/1604/975/3569/5588/10666/695/567/912/3575/3553/10673/3133/80149/8417/7133/10892/114548/301/8809/3594/3134/718/3554/3106/3125/5788/339390/920/4092/3821/64332/6504/7454/91543/7189/64581/729230/56940/3824/8741/722/3565/84868/3122/3136/3593/2213/1378/1178/2625/23529/149041/6556/51561/940/911/2529/84807/913/3263/3142/7128/725/7124/11006/64127/3456/5532/3071/941/2208/8772/11035/3140/10865/641…
BP	GO:0050866	negative regulation of cell activation	189	0.512157	2.71998	1e-10	2.98969e-09	1.87907e-09	4200	tags=45%, list=17%, signal=38%	114897/26191/5156/64092/7056/942/3659/3398/695/3949/864/10875/558/80149/8530/11314/5621/301/11326/6422/11117/3162/3134/10288/55024/7001/2294/5788/339390/114757/6441/4067/374403/3635/2268/7940/2737/54900/4092/2615/4846/23495/8651/7305/640/928/972/729230/79679/56940/7805/3958/3565/3902/84868/10077/80380/2213/1378/57045/4332/8832/3965/3598/149041/9306/18/1493/27242/6688/3142/865/7128/57162/11006/562…
BP	GO:0050766	positive regulation of phagocytosis	66	0.615493	2.71621	1e-10	2.98969e-09	1.87907e-09	4330	tags=55%, list=17%, signal=45%	6347/2358/2220/3553/5322/78989/5336/10584/718/8547/3600/5788/6441/1794/2219/11031/2207/3601/64581/3560/55423/3561/4153/2213/961/6556/2621/720/140885/7124/721/5873/64127/3071/6647/3458
BP	GO:0002706	regulation of lymphocyte mediated immunity	160	0.525539	2.71425	1e-10	2.98969e-09	1.87907e-09	5128	tags=52%, list=20%, signal=42%	1398/1604/975/3569/10666/695/567/912/3575/3553/3133/8417/7133/10892/114548/5272/8809/3594/3134/718/3554/3106/3125/10125/5788/339390/10225/114836/4092/4068/3821/6504/7454/91543/7189/729230/56940/11126/3824/8741/722/3823/3565/3902/84868/3122/3136/3593/2213/1378/1178/2625/23529/3965/51561/3805/940/911/2529/59067/913/3263/387837/725/7124/11006/56253/409/64127/3456/5532/3071/100507436/2208/8772/11035/…
BP	GO:0060326	cell chemotaxis	273	0.490126	2.71282	1e-10	2.98969e-09	1.87907e-09	4978	tags=45%, list=20%, signal=37%	1398/6347/2358/6363/5156/6366/1969/3569/9023/5588/5142/6387/728/7057/9547/63940/6279/7852/3553/5054/1902/1436/3164/8600/6372/51119/1230/6283/301/240/6352/1236/55742/6368/3680/719/1906/1910/2920/388372/3219/1839/6441/4067/1960/59341/6280/5880/2841/6288/54210/2247/9353/10663/5294/6504/708/5872/2207/391/414062/972/729230/2047/185/11151/199/80310/3603/3958/643/1667/2833/3565/64094/6558/6349/5641/6359…
BP	GO:0002683	negative regulation of immune system process	370	0.472795	2.71204	1e-10	2.98969e-09	1.87907e-09	4366	tags=43%, list=17%, signal=36%	1398/6347/9173/5734/26191/6366/64092/1997/1604/2/942/11213/710/6387/4609/3659/3398/695/3428/7057/3949/864/3575/2534/10875/558/3133/80149/4889/8530/7099/11314/5272/5621/79037/301/1831/4938/11326/6422/11117/3162/3134/10288/3106/2633/55024/653/7001/714/2294/5788/339390/10225/6441/4067/374403/3635/2268/7940/2841/2737/54900/84174/4092/7043/2615/4068/7098/9353/3821/9404/23495/6504/8651/7305/640/10272/9…
BP	GO:0097530	granulocyte migration	139	0.533317	2.71131	1e-10	2.98969e-09	1.87907e-09	5123	tags=53%, list=20%, signal=42%	6347/5734/6363/6366/5142/728/7057/6279/3553/1436/4615/11314/6372/6283/301/6352/1236/6368/3554/3680/719/1906/2920/388372/59341/6280/5880/6288/54210/9353/5294/6504/708/255231/2207/391/414062/972/3958/3565/5175/6349/6359/4283/6850/1240/8288/6369/4354/51561/2919/2529/3689/6348/1441/9948/5293/6362/64127/3071/83700/3929/6367/683/2921/6361/7130/6360/3627/57402/23765/5196/1803
BP	GO:0006909	phagocytosis	220	0.501126	2.70629	1e-10	2.98969e-09	1.87907e-09	4330	tags=45%, list=17%, signal=37%	55647/6347/2358/8406/5359/7057/3949/2534/2220/3553/5322/3543/558/78989/7099/4615/11314/301/8685/5336/10584/718/8547/3600/9936/3385/2934/5788/7052/6441/4067/79767/1794/2268/5880/2219/9938/1265/6504/7305/11031/25912/4481/306/2207/3601/391/7097/64581/729230/3560/5031/11151/55423/199/722/4689/929/3561/5175/4153/64005/2213/311/961/4688/3394/6850/3055/6556/286046/201294/998/338382/3689/56990/2621/5868/…
BP	GO:0071347	cellular response to interleukin-1	103	0.558827	2.70533	1e-10	2.98969e-09	1.87907e-09	5201	tags=55%, list=21%, signal=44%	6347/1958/3037/6363/6366/3569/11213/4609/3091/81030/10365/3553/80149/4615/6352/6422/7850/6368/3554/1906/2633/388372/3280/27063/10010/4824/5740/9100/7189/414062/5970/820/3557/9590/6349/6359/961/6369/8564/149041/6095/199713/4790/6348/140885/5105/8692/6362/8986/6367/4313/54726/6361/6360/3551/7528/1051
BP	GO:0032611	interleukin-1 beta production	83	0.581401	2.70384	1e-10	2.98969e-09	1.87907e-09	4861	tags=53%, list=19%, signal=43%	1958/6363/3569/353514/3428/80149/10892/114548/7099/4615/3717/1236/1992/834/149628/2950/6774/7305/51311/115362/64581/2149/11027/841/9447/4332/945/3965/24145/199713/7128/6348/3098/140885/7124/11006/409/64127/3479/351/3458/54206/91662/10333
BP	GO:0032651	regulation of interleukin-1 beta production	83	0.581401	2.70384	1e-10	2.98969e-09	1.87907e-09	4861	tags=53%, list=19%, signal=43%	1958/6363/3569/353514/3428/80149/10892/114548/7099/4615/3717/1236/1992/834/149628/2950/6774/7305/51311/115362/64581/2149/11027/841/9447/4332/945/3965/24145/199713/7128/6348/3098/140885/7124/11006/409/64127/3479/351/3458/54206/91662/10333
BP	GO:0000819	sister chromatid segregation	168	-0.586463	-2.69827	1e-10	2.98969e-09	1.87907e-09	3060	tags=46%, list=12%, signal=41%	5889/51434/55055/5518/23310/25836/27127/8658/442582/25936/81930/8243/3837/286053/23126/10726/64940/27436/11130/54441/3192/4751/9918/9319/7756/1663/9928/79980/51433/11004/10615/55755/4085/83540/699/51529/9232/26271/54892/9031/9700/10051/1062/27175/7272/24137/10592/29127/26993/891/991/2237/990/81620/9493/64105/29945/113130/1063/9212/146909/64151/10403/10460/7283/51203/9735/29781/55143/7517/3833/905…
BP	GO:0071621	granulocyte chemotaxis	114	0.547533	2.69814	1e-10	2.98969e-09	1.87907e-09	5123	tags=55%, list=20%, signal=44%	6347/6363/6366/5142/728/7057/6279/3553/1436/6372/6283/301/6352/1236/6368/3680/719/1906/2920/388372/59341/6280/5880/6288/54210/9353/5294/6504/708/2207/414062/972/3958/3565/6349/6359/4283/6850/1240/6369/4354/51561/2919/3689/6348/1441/5293/6362/64127/3071/83700/3929/6367/683/2921/6361/7130/6360/3627/57402/23765/5196/1803
BP	GO:0070555	response to interleukin-1	129	0.538648	2.69812	1e-10	2.98969e-09	1.87907e-09	5201	tags=55%, list=21%, signal=44%	6347/1958/3037/6363/6366/3569/11213/4609/3091/81030/10365/3553/80149/4615/301/6401/6352/6422/7850/6368/3554/1906/2633/388372/3280/27063/10010/1116/4824/5740/9100/6609/7189/414062/5970/820/3557/6622/9590/3476/6349/6359/961/3965/6369/8564/149041/6095/199713/4790/6348/140885/5105/2729/8692/952/6362/6880/8986/351/6367/2056/2690/4313/54726/6361/6360/3551/1535/7528/1051
BP	GO:0050900	leukocyte migration	345	0.47331	2.69708	1e-10	2.98969e-09	1.87907e-09	4978	tags=45%, list=20%, signal=37%	1398/6347/2358/5734/6363/6366/975/3569/9023/5142/6387/6402/728/7057/64805/2534/63940/6279/7852/3553/1621/1893/10894/5054/1436/4615/81704/11314/8600/6372/10164/51119/1230/6283/301/240/6401/6352/1236/11117/3162/6368/3676/3554/3680/719/1906/1910/2920/388372/6403/653/6441/4067/59341/6280/5880/2841/6288/54210/9353/5294/6504/708/255231/2207/391/414062/6404/928/972/729230/11151/199/80310/5724/3603/3958/…
BP	GO:0051249	regulation of lymphocyte activation	416	0.467871	2.69489	1e-10	2.98969e-09	1.87907e-09	4366	tags=43%, list=17%, signal=36%	6347/6363/26191/3572/6366/64092/1604/975/3569/942/5588/3659/3398/695/567/864/912/3575/2534/1949/3553/10875/678/3543/10673/558/3133/80149/639/7133/10892/114548/7099/4615/81704/939/11314/5621/8600/301/3662/6352/3717/1236/11326/3594/6422/3134/10148/10288/3600/55024/3125/10125/677/7001/3280/5788/339390/6441/4067/374403/1960/3485/920/596/3635/2268/7940/5880/2737/54900/4092/2615/914/8915/3117/23495/643…
BP	GO:1990868	response to chemokine	86	0.569191	2.68222	1e-10	2.98969e-09	1.87907e-09	5612	tags=59%, list=22%, signal=46%	6347/6363/6366/6387/3091/7852/80149/81704/6372/1230/6352/1236/6368/1906/2920/388372/2296/9353/10663/414062/729230/643/2833/6558/6349/6359/4283/10803/1240/6369/2919/1233/2185/6348/6362/11240/6367/4352/2921/10936/1232/10019/6361/6360/3627/5196/7032/6373/387/6586/6355
BP	GO:1990869	cellular response to chemokine	86	0.569191	2.68222	1e-10	2.98969e-09	1.87907e-09	5612	tags=59%, list=22%, signal=46%	6347/6363/6366/6387/3091/7852/80149/81704/6372/1230/6352/1236/6368/1906/2920/388372/2296/9353/10663/414062/729230/643/2833/6558/6349/6359/4283/10803/1240/6369/2919/1233/2185/6348/6362/11240/6367/4352/2921/10936/1232/10019/6361/6360/3627/5196/7032/6373/387/6586/6355
BP	GO:0019724	B cell mediated immunity	134	0.530058	2.6798	1e-10	2.98969e-09	1.87907e-09	4326	tags=49%, list=17%, signal=41%	715/730/1604/975/3665/10666/710/695/567/3543/3133/3426/716/4615/939/713/51279/735/718/1191/3125/714/10538/5788/602/729/3635/84174/8915/3117/708/712/51311/2207/972/3113/8741/722/325/3565/3119/3115/4153/3122/959/3111/2213/1378/23529/3126/10747/3598/940/3263/733/720/725/7124/721/3109/64127/50615/23075/2209/3112/2208
BP	GO:0071216	cellular response to biotic stimulus	218	0.496703	2.6777	1e-10	2.98969e-09	1.87907e-09	3634	tags=44%, list=14%, signal=38%	7538/6347/59307/26191/1604/3569/942/5142/695/22933/3553/558/80149/5054/654/7133/10892/114548/7099/4615/9450/6372/6352/245928/10628/3717/57088/5336/10288/706/51510/1910/2920/824/7001/27063/4067/57817/834/11093/2950/8915/7096/4846/6915/23328/23643/7189/23729/7097/64581/923/5970/820/9451/347252/7431/5724/11027/57048/929/1667/1668/84868/5606/80380/3593/85363/9373/2213/4283/3394/6850/22904/3055/2672/8…
BP	GO:0045785	positive regulation of cell adhesion	417	0.465246	2.67509	1e-10	2.98969e-09	1.87907e-09	4366	tags=41%, list=17%, signal=34%	1398/6347/3037/6363/26191/3572/6366/1604/975/3569/3716/942/5588/6387/64805/567/7010/864/912/3575/2534/1949/3553/25890/22915/10673/3133/10892/114548/91663/81704/939/8600/960/10164/301/240/6401/6352/3717/288/1236/3594/6422/11117/5329/3676/10148/10288/9806/3600/6403/3125/10125/2113/4651/2294/3280/5788/8631/7052/4067/1960/3485/920/54453/1842/2737/80173/4092/6288/5530/4739/8915/3117/64332/6504/708/865…
BP	GO:0031349	positive regulation of defense response	256	0.484757	2.67431	1e-10	2.98969e-09	1.87907e-09	4366	tags=45%, list=17%, signal=38%	2358/9173/5743/5734/3572/975/3569/3665/5359/10666/353514/695/3428/81030/3949/912/2534/63940/6279/3553/5322/3133/5054/4889/7099/8600/6283/6352/245928/3717/90865/1236/11117/5336/7132/3134/718/3600/241/10125/2113/5138/120892/4067/59341/6280/834/114836/2219/149628/839/4068/7098/5294/64332/7305/8717/51311/9180/7189/115362/7097/64581/729230/185/661/11126/3824/7294/3603/6622/11027/8723/3823/9111/3902/84…
BP	GO:0006261	DNA-templated DNA replication	122	-0.605605	-2.67332	1e-10	2.98969e-09	1.87907e-09	5246	tags=60%, list=21%, signal=48%	11073/5982/64710/80198/11284/1017/222229/79733/51053/3159/5558/545/10293/54107/80174/25792/50485/56897/51659/10714/55159/84296/5557/51547/30968/146956/5426/51750/8317/64785/29935/5976/4175/1763/63901/4173/54962/1663/4176/11169/55388/59343/5983/5427/64863/5985/9401/26271/8914/5984/4172/3978/144455/898/2237/990/81620/5981/4174/5424/63922/4171/10721/6240/5422/29980/23649/9400/3980/9134/641/9984/9416
BP	GO:0032103	positive regulation of response to external stimulus	392	0.463402	2.67184	1e-10	2.98969e-09	1.87907e-09	4142	tags=41%, list=16%, signal=34%	2358/9173/5743/5734/6363/3572/6366/7056/975/3569/3665/5359/10666/6387/353514/728/695/3428/7057/81030/64805/3949/912/2534/63940/6279/7852/3553/5322/4908/3133/5054/4889/654/1436/7099/9450/8600/1230/6283/55601/6352/245928/3717/90865/1236/11117/5336/7132/3134/718/719/1906/3600/241/10125/2113/5138/120892/4067/59341/6280/834/5880/114836/2219/149628/26057/659/839/4068/2247/7098/2152/9353/5294/23328/6433…
BP	GO:0016064	immunoglobulin mediated immune response	131	0.529637	2.67044	1e-10	2.98969e-09	1.87907e-09	4326	tags=50%, list=17%, signal=41%	715/730/1604/975/3665/10666/710/695/567/3543/3133/3426/716/4615/939/713/51279/735/718/1191/3125/714/10538/5788/602/729/3635/8915/3117/708/712/51311/2207/972/3113/8741/722/325/3565/3119/3115/4153/3122/959/3111/2213/1378/23529/3126/10747/3598/940/3263/733/720/725/7124/721/3109/64127/50615/23075/2209/3112/2208
BP	GO:0046634	regulation of alpha-beta T cell activation	97	0.560841	2.66993	1e-10	2.98969e-09	1.87907e-09	4115	tags=53%, list=16%, signal=44%	6363/26191/1604/975/942/5588/3659/864/3133/80149/639/10892/114548/11314/301/3662/3717/3594/10148/3125/5788/2737/4092/64332/8651/7048/729230/11126/916/3565/3122/3593/7535/57045/2625/9308/6850/3965/149041/51561/940/84807/3142/865/11006/3707/56253/868/257101/3071/941
BP	GO:0030595	leukocyte chemotaxis	208	0.49634	2.66495	1e-10	2.98969e-09	1.87907e-09	5123	tags=48%, list=20%, signal=38%	6347/2358/6363/6366/3569/9023/5142/6387/728/7057/63940/6279/7852/3553/5054/1436/8600/6372/51119/1230/6283/301/240/6352/1236/6368/3680/719/1906/1910/2920/388372/6441/4067/59341/6280/5880/2841/6288/54210/9353/5294/6504/708/2207/414062/972/729230/11151/199/3603/3958/643/1667/3565/6558/6349/5641/6359/4283/6850/1240/3965/6369/4354/51561/2919/796/3689/2185/6688/245937/2621/4681/5764/6348/1441/5293/6362…
BP	GO:0046632	alpha-beta T cell differentiation	104	0.548438	2.65858	1e-10	2.98969e-09	1.87907e-09	3417	tags=51%, list=14%, signal=44%	5734/6363/3569/942/3659/864/3702/80149/639/10892/114548/301/3662/8809/3594/10538/602/596/114836/2841/2737/4092/64919/4063/8320/6774/64332/8651/7048/91543/64218/57089/3565/159296/3122/3593/7535/2625/9308/6850/3965/149041/51561/6095/944/2529/59067/84807/3142/865/6146/11006/3707
BP	GO:0050764	regulation of phagocytosis	91	0.564374	2.65444	1e-10	2.98969e-09	1.87907e-09	4330	tags=51%, list=17%, signal=42%	6347/2358/5359/2220/3553/5322/78989/11314/5336/10584/718/8547/3600/5788/7052/6441/1794/2268/2219/1265/11031/2207/3601/7097/64581/3560/55423/3561/4153/2213/961/6850/3055/6556/2621/720/140885/7124/9474/721/5873/23208/64127/3071/6647/3458
BP	GO:0030593	neutrophil chemotaxis	95	0.56102	2.6512	1e-10	2.98969e-09	1.87907e-09	5123	tags=57%, list=20%, signal=45%	6347/6363/6366/5142/728/6279/3553/6372/6283/6352/1236/6368/3680/719/1906/2920/388372/6280/5880/6288/54210/9353/5294/708/2207/414062/972/3958/6349/6359/4283/6850/6369/4354/51561/2919/3689/6348/1441/5293/6362/64127/3071/83700/3929/6367/683/2921/6361/7130/6360/3627/5196/1803
BP	GO:0032729	positive regulation of interferon-gamma production	74	0.580285	2.64325	1e-10	2.98969e-09	1.87907e-09	3439	tags=47%, list=14%, signal=41%	26191/5142/10666/3553/5144/7099/8809/3717/3594/3554/10148/10125/602/114836/914/7098/6504/51311/64581/729230/3113/11126/916/7294/929/3115/84868/3593/3394/3965/6556/51561/59067/7124/56253
BP	GO:1990266	neutrophil migration	116	0.533644	2.64101	1e-10	2.98969e-09	1.87907e-09	5123	tags=53%, list=20%, signal=42%	6347/6363/6366/5142/728/6279/3553/4615/6372/6283/6352/1236/6368/3554/3680/719/1906/2920/388372/6280/5880/6288/54210/9353/5294/708/255231/2207/391/414062/972/3958/5175/6349/6359/4283/6850/6369/4354/51561/2919/2529/3689/6348/1441/9948/5293/6362/64127/3071/83700/3929/6367/683/2921/6361/7130/6360/3627/5196/1803
BP	GO:0002821	positive regulation of adaptive immune response	104	0.544151	2.6378	1e-10	2.98969e-09	1.87907e-09	3008	tags=43%, list=12%, signal=38%	3572/1604/975/3569/5588/10666/695/567/912/3553/10673/3133/8417/10892/114548/8809/3594/3134/718/3554/3106/3125/5788/8631/920/64332/6504/91543/7189/64581/729230/8741/3565/3122/3136/3593/2625/23529/6556/51561/940/911/84807/913/3263
MF	GO:0004896	cytokine receptor activity	90	0.559857	2.63304	1e-10	2.98969e-09	1.87907e-09	3305	tags=47%, list=13%, signal=41%	9173/3572/3977/3575/7852/8807/960/3587/1230/8809/1236/3594/7850/3554/10148/3556/920/3459/2674/2152/10663/9180/116379/3601/972/729230/3560/3588/643/2833/2675/3561/3593/2322/10803/1240/3455/3568/3598/1233/389400/1441
BP	GO:0098813	nuclear chromosome segregation	223	-0.55368	-2.63236	1e-10	2.98969e-09	1.87907e-09	3060	tags=43%, list=12%, signal=38%	5889/51434/55055/5518/23310/25836/55920/11144/51547/27127/8658/442582/25936/146956/81930/8243/3837/286053/29893/23126/2177/150465/10726/64940/27436/11130/55166/54441/3192/4751/9918/200942/9319/7756/1663/9928/79980/51433/11004/10615/55755/4085/83540/699/51529/81610/9232/26271/54892/9031/147841/9700/10051/1062/27175/7272/24137/57405/10592/29127/26993/891/991/898/2237/990/81620/9493/64105/29945/1131…
BP	GO:0002286	T cell activation involved in immune response	110	0.537384	2.62905	1e-10	2.98969e-09	1.87907e-09	4115	tags=45%, list=16%, signal=38%	5734/6363/975/3569/942/10875/80149/10892/114548/301/3662/6194/8809/3594/10538/602/114836/4092/4063/8320/6774/64332/2207/972/64218/57089/3958/3565/84868/3122/3593/2213/3383/2625/5663/3965/149041/6556/51561/6095/911/59067/84807/3142/5105/3109/5873/3456/3071/941
BP	GO:0043367	CD4-positive, alpha-beta T cell differentiation	77	0.575867	2.62787	1e-10	2.98969e-09	1.87907e-09	3113	tags=49%, list=12%, signal=43%	5734/6363/3569/942/864/80149/10892/114548/301/3662/8809/3594/10538/602/114836/4092/4063/6774/64332/8651/91543/64218/57089/3565/159296/3122/3593/2625/9308/3965/149041/51561/6095/2529/59067/84807/3142/865
BP	GO:0001818	negative regulation of cytokine production	238	0.476773	2.62519	1e-10	2.98969e-09	1.87907e-09	4140	tags=42%, list=16%, signal=35%	7538/9314/9173/59307/5552/5734/26191/1969/3569/11213/353514/695/7057/10365/558/80149/5966/114548/7099/5443/5621/54941/301/245928/1540/4938/1236/11326/1992/7850/3162/3134/706/2633/55024/23547/5788/602/10225/6441/3635/2841/4092/7043/2615/2950/57447/6504/708/307/7305/51311/3596/7805/9111/3565/2627/3902/84868/50856/80380/3593/4317/25987/5678/2213/1378/57045/2625/8832/945/9308/1240/3965/8288/6556/5156…
BP	GO:0002695	negative regulation of leukocyte activation	169	0.504823	2.62163	1e-10	2.98969e-09	1.87907e-09	4200	tags=45%, list=17%, signal=38%	26191/64092/942/3659/3398/695/3949/864/10875/558/80149/8530/11314/5621/301/11326/6422/3162/3134/10288/55024/7001/2294/5788/339390/6441/4067/374403/3635/2268/7940/2737/54900/4092/2615/23495/8651/7305/640/972/729230/79679/56940/7805/3958/3565/3902/84868/10077/80380/2213/1378/57045/4332/8832/3965/3598/149041/9306/1493/27242/6688/3142/865/7128/57162/11006/56253/472/23208/3456/868/8379/3071/941/100507…
BP	GO:0006281	DNA repair	408	-0.516871	-2.60793	1e-10	2.98969e-09	1.87907e-09	5908	tags=50%, list=23%, signal=39%	5111/10273/1054/10036/11277/78990/9557/5885/83990/4287/7486/85015/7158/23064/5810/2140/11073/4292/9025/5893/5982/5395/64710/80198/11284/7874/151987/2175/55247/1017/199720/56154/3148/196528/8607/23198/5932/1161/7516/25/51366/27301/135458/317761/545/1660/27030/27343/10293/84690/2187/80820/2138/8450/1454/55100/86/257218/84309/79913/27339/7335/51368/50485/5889/56897/1653/2547/8930/64110/51659/4595/84…
BP	GO:0007596	blood coagulation	207	0.486026	2.60599	1e-10	2.98969e-09	1.87907e-09	6262	tags=52%, list=25%, signal=40%	4780/114897/3572/5156/7056/3569/5359/5588/710/10672/7057/64805/22915/7980/558/5054/7099/3717/9060/5329/5336/1906/11234/6403/7001/1606/8529/4067/11093/6288/3998/2152/4846/5294/6915/7454/640/2207/928/151/5023/3083/2158/2149/7294/2160/10077/959/10855/5341/5051/6814/6850/10544/653145/3611/8858/18/5055/2621/5627/725/5327/2162/2316/7103/1361/7414/84034/50808/5873/375033/10398/308/3932/2811/1281/83706/1…
BP	GO:0006302	double-strand break repair	200	-0.555471	-2.60552	1e-10	2.98969e-09	1.87907e-09	5559	tags=55%, list=22%, signal=43%	5885/83990/7486/7158/23064/2140/4292/9025/5893/64710/80198/11284/151987/199720/56154/3148/196528/8607/5932/1161/7516/51366/135458/317761/27343/2187/2138/55100/86/84309/79913/27339/50485/5889/1653/2547/64110/51659/8438/55159/9937/6944/7515/2521/25836/84296/11200/23503/5591/11144/51547/146956/51720/54840/9112/51750/11077/286053/8317/7156/25788/29935/23126/56893/2177/4175/79728/4436/1111/142/1763/63…
BP	GO:0002824	positive regulation of adaptive immune response based on somatic recombination of immune receptors built from immunoglobulin superfamily domains	99	0.541094	2.60218	1e-10	2.98969e-09	1.87907e-09	3008	tags=43%, list=12%, signal=38%	1604/975/3569/5588/10666/695/567/912/3553/10673/3133/8417/10892/114548/8809/3594/3134/718/3554/3106/3125/5788/920/64332/6504/91543/7189/64581/729230/8741/3565/3122/3136/3593/2625/23529/6556/51561/940/911/84807/913/3263
BP	GO:0034612	response to tumor necrosis factor	217	0.48261	2.59496	1e-10	2.98969e-09	1.87907e-09	3534	tags=40%, list=14%, signal=35%	7538/6347/3037/4780/5743/6363/6366/837/5516/7057/10365/678/10673/80149/7133/8600/6401/6352/1540/3717/6422/6368/7132/1906/1545/2633/388372/677/1393/83643/3280/55022/2643/608/355/27063/10010/28512/57817/1116/834/11093/5609/2950/4824/8717/1984/6609/7189/414062/5970/820/7805/9590/3476/929/965/841/9447/8115/3987/329/6349/6359/2625/54469/6850/6369/3611/427/8754/6095/796/10594/2185/27242/255743/2621/712…
BP	GO:0019882	antigen processing and presentation	99	0.537969	2.58714	1e-10	2.98969e-09	1.87907e-09	5823	tags=59%, list=23%, signal=45%	6363/6366/7057/567/912/10875/3133/925/51762/1236/3134/10288/3106/1520/3125/10332/3117/5870/7454/2207/7189/972/3113/3107/3119/3115/3122/3136/50856/3111/2213/3383/5641/3126/6556/911/913/3416/9474/968/3109/5873/9363/64127/8722/23180/3112/10981/3140/55207/3551/51128/3105/5696/30835/1510/563/5867
BP	GO:0071674	mononuclear cell migration	177	0.490342	2.58256	1e-10	2.98969e-09	1.87907e-09	3439	tags=40%, list=14%, signal=35%	1398/6347/2358/6363/6366/3569/9023/6387/728/7057/7852/1893/5054/1436/81704/8600/1230/6283/301/240/6352/1236/6368/3676/719/388372/653/4067/59341/6288/9353/5294/6504/708/414062/729230/199/80310/3958/1667/3565/5175/2059/64005/6558/3383/7535/6349/3695/5641/6359/961/2625/375056/1240/3965/6793/6369/2529/998/796/2185/6688/245937/2621/4681/58494/6348/140885/7124/56253
BP	GO:0050852	T cell receptor signaling pathway	115	0.524188	2.58147	1e-10	2.98969e-09	1.87907e-09	3014	tags=45%, list=12%, signal=40%	26191/1997/975/5142/10666/2534/3702/5144/80149/925/10892/11314/5621/79037/1236/5336/2633/3125/5788/8631/56244/3635/84174/4068/50852/8915/64332/3937/919/7189/5970/79679/56940/11126/7294/7805/3958/3119/3115/84433/84106/3783/114625/7535/2625/5663/23149/149041/940/1493/84807/27242
BP	GO:0050817	coagulation	211	0.48202	2.5809	1e-10	2.98969e-09	1.87907e-09	6262	tags=52%, list=25%, signal=39%	4780/114897/3572/5156/7056/3569/5359/5588/710/10672/7057/64805/22915/7980/558/5054/7099/3717/9060/5329/5336/1906/11234/6403/7001/1606/8529/4067/11093/6288/3998/2152/4846/5294/6915/7454/640/2207/928/151/5023/3083/2158/2149/7294/2160/10077/959/10855/5341/5663/5051/6814/6850/10544/653145/3611/8858/18/5055/2621/5627/725/5327/2162/2316/7103/1361/7414/84034/50808/5873/375033/10398/308/3932/2811/1281/83…
CC	GO:0098687	chromosomal region	272	-0.530703	-2.57798	1e-10	2.98969e-09	1.87907e-09	3022	tags=41%, list=12%, signal=37%	56897/2547/55055/23291/2491/5518/7515/1642/23310/11339/55920/9219/11200/5591/11144/27127/8658/23468/57187/25936/81930/8243/51750/6612/27085/286053/29935/91687/55746/5905/5976/4175/328/4436/1111/5514/142/1763/11130/4173/55166/55226/4221/3192/5515/4751/9918/1108/24144/1058/7756/1786/4176/79980/11004/10615/54821/4085/83540/10111/699/10635/9793/3070/25942/9401/84295/147841/5525/10051/1062/7272/4172/9…
BP	GO:0007599	hemostasis	213	0.480454	2.57787	1e-10	2.98969e-09	1.87907e-09	6262	tags=52%, list=25%, signal=39%	4780/114897/3572/5156/7056/3569/5359/5588/710/10672/7057/64805/22915/7980/558/5054/7099/3717/9060/5329/5336/1906/11234/6403/7001/1606/8529/4067/11093/6288/3998/4778/2152/4846/5294/6915/7454/640/2207/928/151/5023/3083/2158/2149/7294/2160/10077/959/10855/5341/5051/6814/6850/10544/653145/3611/8858/18/5055/2621/5627/725/5327/2162/2316/7103/1361/7414/84034/50808/5873/375033/10398/308/3932/2811/1281/83…
BP	GO:0002685	regulation of leukocyte migration	195	0.487843	2.57746	1e-10	2.98969e-09	1.87907e-09	4969	tags=45%, list=20%, signal=36%	1398/6347/2358/5734/6363/6366/975/3569/6387/728/7057/64805/63940/1893/10894/5054/1436/4615/81704/11314/10164/1230/301/6401/6352/1236/11117/3162/3676/3554/719/1906/6403/653/4067/59341/5880/2841/9353/6504/708/391/928/972/729230/199/80310/5724/3958/2833/3565/3383/5641/961/375056/1240/3965/6793/6369/4354/51561/2529/2185/6688/245937/2621/4681/5764/58494/6348/7124/64127/11240/3071/23075/83700/351/3929/…
BP	GO:0007059	chromosome segregation	270	-0.53211	-2.57377	1e-10	2.98969e-09	1.87907e-09	3060	tags=40%, list=12%, signal=36%	5889/51434/55055/5518/23310/25836/11339/55920/11144/51547/27127/8658/6732/442582/25936/146956/81930/8243/3837/286053/7156/7329/29893/23126/2177/1104/150465/10726/64940/27436/11130/55166/54441/3192/4751/9918/157313/200942/9319/7756/1663/9928/79980/51433/11004/10615/55755/4085/83540/672/699/51529/81610/9232/26271/54892/9031/147841/9700/10051/1062/27175/7272/24137/57405/10592/29127/26993/891/991/898…
BP	GO:0002366	leukocyte activation involved in immune response	264	0.461563	2.56936	1e-10	2.98969e-09	1.87907e-09	4376	tags=44%, list=17%, signal=36%	5734/6363/975/3569/942/695/10875/80149/5730/10892/114548/7099/4615/11314/301/3662/6194/8809/3594/3162/5336/3134/10125/2294/10538/5788/602/4067/139818/1776/1794/2268/5880/114836/4092/4063/8320/5294/6774/64332/6504/7305/640/306/2207/3596/972/64581/729230/11151/8741/5724/11027/64218/57089/3958/8723/9111/3565/8773/159296/84868/3122/959/3593/84106/2213/3383/1378/9452/3394/2625/5663/23529/8832/5450/681…
BP	GO:0002263	cell activation involved in immune response	267	0.458301	2.55901	1e-10	2.98969e-09	1.87907e-09	4376	tags=43%, list=17%, signal=36%	5734/6363/975/3569/942/695/10875/80149/5730/10892/114548/7099/4615/11314/301/3662/6194/8809/3594/3162/5336/3134/10125/2294/10538/5788/602/4067/139818/1776/1794/2268/5880/114836/4092/4063/8320/5294/6774/64332/6504/7305/640/306/2207/3596/972/64581/729230/11151/8741/5724/11027/64218/57089/3958/8723/9111/3565/8773/159296/84868/3122/959/3593/84106/2213/3383/1378/9452/3394/2625/5663/23529/8832/5450/681…
BP	GO:0002705	positive regulation of leukocyte mediated immunity	122	0.512382	2.54673	1e-10	2.98969e-09	1.87907e-09	3496	tags=45%, list=14%, signal=39%	1604/975/3569/10666/695/567/912/3553/3133/8417/10892/114548/8809/3594/5336/3134/718/3554/3106/3125/10125/9188/5788/114836/4068/6504/7305/91543/7189/64581/11126/3824/8741/5724/3823/3565/3902/3122/3136/3593/2625/23529/51561/3805/940/170506/911/59067/913/3689/3263/6688/7124/56253/3684
BP	GO:0030217	T cell differentiation	246	0.463068	2.54672	1e-10	2.98969e-09	1.87907e-09	4115	tags=44%, list=16%, signal=37%	1958/5734/6363/26191/3569/942/3659/567/864/912/3575/3553/10875/3702/678/80149/639/925/10892/114548/939/301/3662/6194/8809/1236/3594/10288/3600/10125/677/915/7001/10538/5788/602/1960/920/1794/596/114836/2841/2737/4092/64919/4063/914/8320/3821/6774/64332/8651/7048/91543/2207/972/729230/9935/2736/917/916/54361/64218/57089/3565/159296/3902/3122/84433/3593/3111/5678/8325/7535/1378/1021/10803/2625/9308…
BP	GO:1903131	mononuclear cell differentiation	405	0.442062	2.54574	1e-10	2.98969e-09	1.87907e-09	3439	tags=37%, list=14%, signal=32%	1958/3725/5734/6363/26191/3569/3665/942/4609/3659/3398/695/3428/567/864/912/3575/3553/10875/3702/678/10673/558/80149/639/925/1436/10892/114548/939/55509/301/3662/6194/8809/1236/3594/973/6422/3676/5336/10288/3600/3106/10125/677/915/7001/10538/5788/602/4067/139818/1960/112616/920/1794/596/3635/114836/2841/2737/4092/64919/4063/914/4495/8320/3821/6774/64332/6504/8651/7048/640/10320/91543/2207/3601/71…
BP	GO:0002275	myeloid cell activation involved in immune response	89	0.539982	2.54465	1e-10	2.98969e-09	1.87907e-09	4376	tags=53%, list=17%, signal=44%	695/5730/4615/11314/3162/5336/10125/2294/4067/1776/1794/2268/5880/5294/6504/7305/640/306/2207/3596/729230/5724/11027/8723/9111/3565/8773/84868/84106/8832/6814/6850/3965/22904/3598/6844/201294/3689/6688/6348/6284/3684/5293/6845/3929/3458/5729
BP	GO:0071356	cellular response to tumor necrosis factor	198	0.477563	2.53402	1e-10	2.98969e-09	1.87907e-09	3534	tags=39%, list=14%, signal=34%	7538/6347/3037/4780/6363/6366/837/5516/7057/10365/678/10673/80149/7133/8600/6352/1540/3717/6422/6368/7132/1906/1545/2633/388372/677/1393/83643/3280/55022/608/355/27063/10010/28512/57817/1116/834/11093/2950/4824/8717/1984/7189/414062/5970/820/7805/9590/965/841/9447/8115/3987/329/6349/6359/2625/54469/6850/6369/3611/427/6095/796/10594/2185/27242/255743/2621/7128/10670/4790/6348/7124/5105/2819/8692
BP	GO:0051306	mitotic sister chromatid separation	63	-0.634136	-2.52633	1e-10	2.98969e-09	1.87907e-09	3046	tags=49%, list=12%, signal=43%	51434/55055/5518/286053/11130/9319/7756/51433/55755/4085/699/51529/9232/26271/9700/1062/7272/891/990/81620/29945/1063/9212/10403/10460/9735/29781/7517/11065/84861/8697
CC	GO:0000228	nuclear chromosome	162	-0.552048	-2.52554	1e-10	2.98969e-09	1.87907e-09	6092	tags=59%, list=24%, signal=45%	54984/150280/51377/5111/11277/5885/25855/23064/5810/4438/11073/4292/10847/83637/55869/222229/5928/8607/3065/135458/317761/5558/1660/27030/54108/54107/86/79913/50485/23476/51659/23309/10714/6605/84296/5557/64431/11052/11144/51547/27127/8243/5426/7329/64785/29935/29893/4175/1104/1111/63979/4173/3192/5883/4751/9918/54962/79595/4176/11169/55388/65083/57649/10111/5427/672/6598/25942/4798/9031/55929/89…
BP	GO:0051250	negative regulation of lymphocyte activation	143	0.494003	2.52188	1e-10	2.98969e-09	1.87907e-09	4200	tags=45%, list=17%, signal=38%	26191/64092/942/3659/3398/695/864/10875/558/80149/11314/5621/301/11326/6422/3134/10288/55024/7001/339390/6441/4067/374403/3635/2268/7940/2737/54900/4092/2615/23495/8651/7305/640/972/79679/56940/7805/3958/3565/3902/84868/80380/2213/1378/57045/4332/3965/149041/9306/1493/27242/3142/865/7128/57162/11006/56253/472/3456/868/8379/3071/941/100507436
CC	GO:0072562	blood microparticle	105	0.520537	2.52163	1e-10	2.98969e-09	1.87907e-09	5582	tags=48%, list=22%, signal=37%	715/2/710/2220/2022/6386/716/713/2040/51279/735/718/253461/8547/922/1191/2934/714/590/5858/1356/3078/722/325/10878/5216/3263/733/5627/720/12/2162/721/308/3075/3250/3240/3306/71/259/3848/51686/3700/3040/116285/173/2243/4478/2244/3043
CC	GO:0062023	collagen-containing extracellular matrix	400	0.436503	2.51942	1e-10	2.98969e-09	1.87907e-09	5550	tags=42%, list=22%, signal=33%	9510/1634/4239/8406/5359/2/710/6387/3908/7057/1805/5271/2220/10319/6279/25890/10875/1893/22915/7123/165/7472/5054/1308/5272/10516/5199/301/23452/713/9068/2202/127435/1992/6422/11117/8483/83854/4060/8547/7078/1520/1191/59277/10418/714/7373/7052/8425/633/9509/64129/310/6280/1842/8510/2219/4684/79812/7043/5858/3490/3998/4256/25878/2152/1292/307/7837/712/2199/27286/5176/6694/6678/6277/2158/325/3958/2…
BP	GO:0061041	regulation of wound healing	115	0.510008	2.51164	1e-10	2.98969e-09	1.87907e-09	6296	tags=54%, list=25%, signal=41%	1398/4780/114897/5156/7056/710/7057/7852/22915/5054/51330/301/240/1906/7001/1839/90102/2247/2152/4846/6915/928/64581/2149/325/58189/54361/2160/64094/10855/6558/4638/18/5055/58529/7128/5627/7124/5327/7103/1361/5728/2811/150/71/3848/857/10019/10565/634/2191/2243/55966/350/2244/83481/5270/10979/5340/3818/6484/7494
BP	GO:0002526	acute inflammatory response	105	0.518466	2.5116	1e-10	2.98969e-09	1.87907e-09	4485	tags=46%, list=18%, signal=38%	59307/5743/3572/3569/5359/2/695/9332/6279/3553/3133/4889/114548/8600/54658/5547/1236/718/1910/241/57817/1776/6288/54210/2950/2152/5294/9180/923/325/3565/4153/2213/2625/6291/2529/7124/12/90/3250/3240/150/3929/5008/2209/2056/259249/3700
BP	GO:0006260	DNA replication	225	-0.525883	-2.50565	1e-10	2.98969e-09	1.87907e-09	4966	tags=49%, list=20%, signal=40%	64710/80198/11284/1017/222229/79733/5928/8607/51053/253980/3159/5558/545/83743/1660/3060/27343/10919/10293/54108/54107/80174/86/25792/11124/79913/50485/56897/51659/10714/55159/5518/23560/84296/5557/57695/51547/30968/7270/146956/5426/51750/8317/64785/29935/246243/5976/4175/51514/1111/10535/6749/1763/63901/4173/27154/5515/54962/1663/4176/11169/55388/59343/5983/5427/64863/5985/25942/8208/9401/4798/2…
BP	GO:0030098	lymphocyte differentiation	359	0.437232	2.50402	1e-10	2.98969e-09	1.87907e-09	3860	tags=39%, list=15%, signal=33%	1958/5734/6363/26191/3569/942/3659/3398/695/567/864/912/3575/3553/10875/3702/678/10673/558/80149/639/925/10892/114548/939/301/3662/6194/8809/1236/3594/973/6422/3676/5336/10288/3600/10125/677/915/7001/10538/5788/602/139818/1960/112616/920/1794/596/3635/114836/2841/2737/4092/64919/4063/914/8320/3821/6774/64332/6504/8651/7048/10320/91543/2207/3601/972/4783/729230/9935/2736/917/916/54361/64218/57089/…
BP	GO:0000724	double-strand break repair via homologous recombination	112	-0.574194	-2.50187	1e-10	2.98969e-09	1.87907e-09	5559	tags=58%, list=22%, signal=45%	5885/7486/7158/5893/64710/80198/151987/56154/196528/8607/5932/7516/135458/27343/2187/86/5889/64110/51659/8438/55159/6944/7515/2521/25836/84296/23503/11144/51750/286053/8317/7156/25788/29935/23126/56893/4175/79728/1111/142/63979/4173/29072/65123/4176/672/10635/84515/9401/55929/8914/4172/54799/57634/10902/2237/4174/4171/10721/7517/80010/9400/3980/8295/641
BP	GO:0000725	recombinational repair	112	-0.574194	-2.50187	1e-10	2.98969e-09	1.87907e-09	5559	tags=58%, list=22%, signal=45%	5885/7486/7158/5893/64710/80198/151987/56154/196528/8607/5932/7516/135458/27343/2187/86/5889/64110/51659/8438/55159/6944/7515/2521/25836/84296/23503/11144/51750/286053/8317/7156/25788/29935/23126/56893/4175/79728/1111/142/63979/4173/29072/65123/4176/672/10635/84515/9401/55929/8914/4172/54799/57634/10902/2237/4174/4171/10721/7517/80010/9400/3980/8295/641
BP	GO:0070374	positive regulation of ERK1 and ERK2 cascade	186	0.471585	2.49108	1e-10	2.98969e-09	1.87907e-09	4316	tags=40%, list=17%, signal=34%	6347/2358/3725/6363/26191/5156/6366/10253/728/56034/7010/5322/3084/4889/1436/7099/5604/8600/960/1230/6352/8685/1236/3357/6368/388372/10125/10268/5788/9464/148/920/59341/1116/5609/2247/6504/414062/972/5031/5151/11331/2149/80310/9590/84868/3383/6349/6359/5320/3965/6369/387129/168667/116/151306/65009/2185/255743/2621/6348/7124/5728/5906/409/6362/284/64127/3479/351/6367/2771/8074/2056/1813
BP	GO:0050777	negative regulation of immune response	165	0.4823	2.49031	1e-10	2.98969e-09	1.87907e-09	4363	tags=43%, list=17%, signal=36%	1398/9173/64092/1604/2/11213/710/3428/3575/2534/10875/3133/80149/4889/11314/5272/301/4938/11326/3162/3134/3106/2294/5788/339390/10225/4067/3635/2268/4092/3821/6504/729230/56940/11126/3824/722/3958/9111/3565/84868/3593/2213/1378/8832/6850/3965/3055/3598/149041/3805/1493/7376/6688/3142/7128/387837/725/11006/409/64127/3456/1281/5532/3071/259/7525/100507436/1813/79651/6737
CC	GO:0000793	condensed chromosome	200	-0.530508	-2.48842	1e-10	2.98969e-09	1.87907e-09	5559	tags=52%, list=22%, signal=40%	5885/84516/7158/5810/2103/8655/4438/11073/4292/5501/23332/10274/79643/1017/222229/10270/3148/135458/317761/1780/27030/56155/1059/23476/55055/23291/2491/23310/11144/27127/442582/23468/25936/81930/8243/6612/27085/286053/7329/29893/55746/5905/2177/1104/1111/64940/11130/55166/54441/3192/5883/4751/9918/1058/7756/79980/11004/10615/54821/4085/65083/83540/10111/672/699/9793/25942/84295/9031/147841/1062/7…
BP	GO:0002708	positive regulation of lymphocyte mediated immunity	105	0.513503	2.48755	1e-10	2.98969e-09	1.87907e-09	5128	tags=53%, list=20%, signal=43%	1604/975/3569/10666/695/567/912/3553/3133/8417/10892/114548/8809/3594/3134/718/3554/3106/3125/10125/5788/114836/4068/6504/91543/7189/11126/3824/8741/3823/3565/3902/3122/3136/3593/2625/23529/51561/3805/940/911/59067/913/3263/7124/56253/64127/2208/8772/8302/3822/3140/10865/117157/55183/3105
CC	GO:0000779	condensed chromosome, centromeric region	119	-0.563318	-2.47096	1e-10	2.98969e-09	1.87907e-09	2954	tags=45%, list=12%, signal=39%	55055/23291/2491/23310/23468/25936/81930/8243/6612/27085/55746/5905/11130/55166/3192/4751/9918/1058/7756/79980/11004/10615/54821/4085/83540/699/9793/25942/84295/147841/1062/7272/57405/891/81620/64105/57122/25909/79023/1063/9212/64151/10403/3619/11335/79902/9735/79019/1639/332/55355/348995/7514
BP	GO:0002688	regulation of leukocyte chemotaxis	109	0.506113	2.46694	1e-10	2.98969e-09	1.87907e-09	5123	tags=48%, list=20%, signal=38%	6347/2358/6363/6366/3569/6387/728/7057/63940/5054/1436/1230/6352/1236/719/1906/4067/59341/5880/2841/9353/6504/708/972/729230/199/3565/5641/1240/3965/4354/51561/2185/6688/245937/2621/4681/5764/6348/64127/11240/3071/23075/83700/3929/683/7424/7130/79148/3627/57402/1803
BP	GO:0002700	regulation of production of molecular mediator of immune response	148	0.477315	2.45185	1e-10	2.98969e-09	1.87907e-09	3860	tags=41%, list=15%, signal=35%	26191/1604/975/3569/942/11213/10666/695/567/3553/3133/7133/10892/114548/7099/8809/3162/5336/3134/3554/9188/5788/10225/4092/7043/7098/8915/6504/91543/7189/3596/972/64581/729230/11126/11331/8741/7805/3565/959/354/2213/1378/1178/2625/23529/3598/684/3805/940/170506/115352/59067/3263/3098/7124/11006/9474/284/64127/3456
CC	GO:0000775	chromosome, centromeric region	165	-0.533781	-2.44931	1e-10	2.98969e-09	1.87907e-09	2954	tags=42%, list=12%, signal=38%	55055/23291/2491/5518/23310/11339/55920/27127/23468/25936/81930/8243/6612/27085/91687/55746/5905/11130/55166/3192/5515/4751/9918/1058/7756/1786/79980/11004/10615/54821/4085/83540/699/9793/3070/25942/84295/147841/5525/10051/1062/7272/114991/57405/891/81620/64105/113130/57122/25909/79023/1063/9212/64151/10403/6839/3619/11335/79902/9735/55143/79019/1639/332/2146/55355/7153/348995/7514/23244
CC	GO:0000776	kinetochore	111	-0.562583	-2.44548	1e-10	2.98969e-09	1.87907e-09	2954	tags=44%, list=12%, signal=39%	55055/23291/2491/23468/25936/81930/8243/6612/27085/55746/5905/11130/55166/3192/4751/1058/7756/79980/11004/10615/54821/4085/83540/699/9793/25942/84295/147841/1062/7272/57405/891/81620/64105/57122/25909/79023/1063/9212/10403/3619/79902/9735/79019/1639/332/55355/348995/7514
MF	GO:0005201	extracellular matrix structural constituent	159	0.473094	2.44469	1e-10	2.98969e-09	1.87907e-09	5544	tags=44%, list=22%, signal=35%	1634/4239/8406/3908/7057/1805/25890/10875/1893/22915/7980/165/1308/10516/2202/127435/11117/8483/4060/170392/10418/7373/8425/633/64129/920/1116/79812/3490/4256/25878/1292/7837/2199/27286/6678/2331/5549/1307/5553/1296/5118/7007/1462/255743/30008/7058/84034/1281/1285/1289/1305/1310/2200/1286/3913/4146/6975/4585/4969/3918/2006/284217/3371/1293/1300/2243/91522/50939/2244
BP	GO:0019221	cytokine-mediated signaling pathway	429	0.422076	2.44247	1e-10	2.98969e-09	1.87907e-09	5078	tags=41%, list=20%, signal=33%	6347/1958/9173/59307/6363/3572/6366/3977/3569/837/5516/3716/3665/11213/6387/353514/3659/3091/81030/3575/7852/3553/1893/10673/558/4939/55854/1436/7133/4615/8807/8600/6372/960/3587/1230/8809/6352/1540/4938/3717/90865/1236/3594/7850/8519/6368/7132/3554/10990/10148/10288/1906/3600/2920/388372/3556/23547/83643/5788/608/355/28512/920/6775/3459/834/2296/5048/2950/2152/9353/4599/10663/6774/8651/7837/8717…
BP	GO:0140014	mitotic nuclear division	247	-0.508305	-2.43885	1e-10	2.98969e-09	1.87907e-09	3046	tags=39%, list=12%, signal=35%	51434/4733/55055/652/2253/5518/23310/25836/11200/10419/51547/27127/8658/25936/81930/8243/9088/3837/27085/286053/7329/23126/3209/3832/1104/1111/55968/10726/27436/11130/80346/995/3192/4751/9918/157313/200942/2801/9319/7756/9928/79980/51433/11004/10615/55755/54443/4085/83540/699/51529/9232/55125/8086/26271/54892/9031/9700/10051/22974/1062/27175/7272/24137/10592/29127/26993/891/991/990/81620/9493/641…
MF	GO:0140097	catalytic activity, acting on DNA	190	-0.520868	-2.42589	1e-10	2.98969e-09	1.87907e-09	4482	tags=46%, list=18%, signal=38%	5928/8607/5932/55636/7516/399687/27301/6832/1660/6597/27343/54108/54107/79605/1736/50485/5889/56897/1653/2547/8930/4595/8438/10714/9937/7515/11144/54840/5426/51750/4830/165545/7156/25788/5976/4175/328/4436/1773/1763/27434/4173/29104/23583/9156/5883/1108/8458/1786/6596/1663/4176/7374/54821/1775/5983/10111/5427/64863/121642/84515/64421/5985/9401/54784/5984/4172/3978/2956/2237/2071/5981/4174/57680/5…
MF	GO:0140640	catalytic activity, acting on a nucleic acid	448	-0.474513	-2.41289	1e-10	2.98969e-09	1.87907e-09	5908	tags=47%, list=23%, signal=37%	5111/164045/1662/55124/83707/57038/11277/129563/54802/9557/56919/83990/1974/81875/7486/10248/23064/5810/51728/84172/10847/10621/5982/79725/56931/80198/51651/55247/9879/11062/2193/10940/2091/80745/9836/55621/10521/5928/8607/340554/5932/55636/7516/399687/168400/10799/27301/6832/23019/144233/317781/1660/5441/6597/54938/27343/9775/54108/54107/122665/79605/167227/257218/131870/117246/55798/5435/54901/…
BP	GO:0070372	regulation of ERK1 and ERK2 cascade	267	0.431038	2.40678	1e-10	2.98969e-09	1.87907e-09	4856	tags=39%, list=19%, signal=32%	6347/2358/3725/6363/26191/5156/6366/1969/10253/728/56034/7010/3553/5322/3084/4889/1436/467/7099/5604/8600/960/1230/6352/8685/1236/3357/11117/6368/7078/2633/388372/10125/10268/1848/5788/9464/4067/374403/148/920/59341/1116/5609/2950/57447/2247/6504/8661/414062/972/5031/2047/5151/11331/2149/80310/9590/55584/84868/10252/3383/6349/6359/5320/27330/6850/3965/6369/387129/168667/59272/116/151306/65009/218…
CC	GO:0070820	tertiary granule	149	0.464877	2.39345	1e-10	2.98969e-09	1.87907e-09	5819	tags=46%, list=23%, signal=36%	2357/2358/6515/1604/1471/567/8417/11314/5199/5547/2040/5787/5768/10288/1520/160364/1536/374403/5799/3920/1265/116844/5236/2207/23191/820/4069/963/5724/3958/8773/965/4317/2495/1378/961/945/6814/427/6556/2919/3689/51125/79895/25840/978/140885/8987/10159/3684/6947/81619/3240/3071/2352/1828/56954/11026/7130/1535/634/966/23601/102/25797/387/3043/4057/5317
BP	GO:0007093	mitotic cell cycle checkpoint signaling	109	-0.550995	-2.39167	1e-10	2.98969e-09	1.87907e-09	2954	tags=41%, list=12%, signal=37%	55055/55159/9344/11200/5591/1112/60561/9656/146956/51720/51343/2177/4436/51514/1111/5514/11130/65123/5883/54962/9319/7756/835/56658/55755/4085/672/699/4193/7272/80279/891/990/81620/1063/9212/10403/9735/57551/7517/29980/84936/51512/84861/641
BP	GO:0006310	DNA recombination	232	-0.499119	-2.38779	1e-10	2.98969e-09	1.87907e-09	5559	tags=49%, list=22%, signal=38%	5885/83990/7486/7158/23064/4438/4292/9025/5893/3838/79725/64710/80198/6929/151987/56154/7247/3148/196528/8607/5932/7516/27301/135458/317761/6832/27030/27343/2187/79605/86/3586/79913/7037/5889/64110/51659/8438/55159/6944/7515/2521/25836/84296/84057/23503/5591/11144/11105/146956/51750/11077/286053/8317/7156/4437/25788/29935/29893/7292/23126/56893/2177/4175/79728/328/4436/1111/142/116138/63979/27434…
BP	GO:1901342	regulation of vasculature development	251	0.433313	2.38443	1e-10	2.98969e-09	1.87907e-09	4528	tags=36%, list=18%, signal=30%	9314/4780/9510/388/3397/1634/1969/3569/3716/10253/728/3091/7057/133/10365/7010/7852/3553/1893/2022/80149/5054/2658/240/6422/11117/3162/718/719/26051/1545/2113/1536/126393/1116/2296/6050/8742/2247/7098/2152/4846/6915/6774/23328/116844/7048/5740/306/358/729230/5176/10800/820/11126/6678/2013/54361/64218/2627/64094/354/6558/7075/94/10553/6369/168667/5140/2185/57556/7128/3082/7124/8434/23166/7058/9214…
CC	GO:0072686	mitotic spindle	118	-0.543537	-2.37563	1e-10	2.98969e-09	1.87907e-09	2664	tags=39%, list=11%, signal=35%	11076/55920/8658/81930/8243/8841/8317/284403/5905/3832/10726/27436/3192/6907/2801/10615/259266/55755/4085/81610/8086/9700/22974/1062/29127/29899/990/9493/8480/150468/23005/9212/146909/1894/10460/7283/51203/252839/60509/1639/3833/9055/28964/84861/6790/150275
BP	GO:1902105	regulation of leukocyte differentiation	259	0.426616	2.36897	1e-10	2.98969e-09	1.87907e-09	4366	tags=42%, list=17%, signal=35%	2353/6363/3665/942/4609/3659/3398/695/864/3575/10875/678/7071/558/9770/80149/639/3059/2124/10892/114548/7099/939/8600/1230/301/3662/3594/6422/10288/3600/3106/10125/677/7001/714/5788/4067/1960/920/3635/2737/4092/914/7098/64332/8651/7305/7048/10272/3601/7189/972/729230/9935/2736/325/3565/3902/7107/841/3122/84433/4920/3593/11025/28959/3111/5678/2213/7535/1378/22806/1021/5925/2625/9308/6850/3965/1490…
BP	GO:0042060	wound healing	388	0.410506	2.36312	1e-10	2.98969e-09	1.87907e-09	6331	tags=46%, list=25%, signal=35%	1398/4780/114897/3572/5156/7056/3569/5359/5588/710/10672/3091/7057/64805/26127/6279/7852/22915/7980/558/5054/3084/51330/7099/960/5547/301/240/3717/9060/3162/5329/5336/1906/51510/11234/6403/7001/1839/7039/1606/8529/4067/90102/2737/7043/11093/6288/5530/3998/2247/2152/4846/5294/6915/1265/7454/7048/640/2207/6609/928/151/64581/5023/3083/2158/2149/7294/325/58189/54361/2160/10077/64094/959/10855/6558/25…
BP	GO:0045765	regulation of angiogenesis	247	0.428756	2.36296	1e-10	2.98969e-09	1.87907e-09	4528	tags=36%, list=18%, signal=30%	9314/4780/9510/388/1634/1969/3569/3716/10253/728/3091/7057/133/10365/7010/7852/3553/1893/2022/80149/5054/2658/240/6422/11117/3162/718/719/26051/1545/2113/1536/126393/1116/2296/6050/8742/2247/7098/2152/4846/6915/6774/23328/116844/7048/5740/306/358/729230/5176/10800/820/11126/6678/2013/64218/2627/64094/354/6558/7075/94/10553/6369/168667/5140/2185/57556/7128/3082/7124/8434/23166/7058/92140/84034/677…
BP	GO:0070371	ERK1 and ERK2 cascade	289	0.423556	2.36202	1e-10	2.98969e-09	1.87907e-09	4351	tags=36%, list=17%, signal=30%	6347/2358/3725/5734/6363/26191/5156/6366/1969/10253/728/4609/56034/7010/3553/678/5322/3084/4889/1436/467/7099/5604/8600/960/1230/6352/8685/1236/3357/11117/6368/1906/7078/2633/388372/10125/677/10268/1848/5788/9464/4067/374403/148/920/59341/1116/5609/2950/57447/2247/6504/8661/1847/414062/972/5031/2047/5151/11331/2149/80310/9590/55584/84868/10252/3383/6349/6359/5320/27330/6850/3965/6369/387129/16866…
BP	GO:0000280	nuclear division	362	-0.472215	-2.36027	1e-10	2.98969e-09	1.87907e-09	4743	tags=42%, list=19%, signal=35%	2175/1814/79643/56154/10270/245711/225689/84722/347688/1761/55023/317761/391714/9371/5155/27030/64682/10919/56155/84690/55743/138474/3834/9820/57026/5889/51434/4733/55055/8438/652/11022/2253/5518/23310/25836/84057/11200/1164/11144/10419/51547/84930/27127/11105/8658/25936/146956/81930/23236/8243/9088/11077/3837/27085/286053/7329/25788/51343/29893/23126/3209/2177/3832/1104/1111/55968/10726/116138/7…
BP	GO:0033044	regulation of chromosome organization	178	-0.509739	-2.35709	1e-10	2.98969e-09	1.87907e-09	4905	tags=46%, list=19%, signal=37%	55869/11284/7874/1017/225689/8550/8607/26054/545/64682/56155/55743/167227/86/79913/1736/51434/7203/55055/7515/80063/8658/51535/51750/286053/6714/5976/5514/142/11130/23381/55226/3192/4751/9918/10155/9319/7756/1786/1663/51433/55755/4085/10111/4216/699/51529/9232/25942/4798/26271/9031/9700/10051/1062/7272/22880/10592/891/2237/990/81620/10575/29945/113130/10445/1063/54552/9212/64151/10403/10460/4171/…
MF	GO:0005125	cytokine activity	216	0.43416	2.3478	1e-10	2.98969e-09	1.87907e-09	5964	tags=42%, list=24%, signal=32%	6347/4982/6363/6366/10135/3569/6387/9547/3553/10673/7472/3084/654/2658/8600/6372/6352/90865/6368/10148/1906/3600/2920/388372/653/112616/8742/7043/2247/3596/414062/8741/3557/3603/54361/649/3565/146225/959/3593/6349/6359/4283/23529/92304/114900/10447/7484/6369/64806/51561/7076/2919/944/59067/6348/3589/7124/64388/7479/3574/6362/3456/9235/4050/5008/6367/2056/3458/3976/7482/2921/7475/6361/6360/3627/46…
BP	GO:0002221	pattern recognition receptor signaling pathway	153	0.451544	2.3412	1e-10	2.98969e-09	1.87907e-09	5736	tags=50%, list=23%, signal=39%	26191/3665/11213/3659/695/64135/7099/4615/57142/11314/54941/55601/3662/1540/4938/2099/5336/1520/118788/23547/4067/2219/26057/7098/8915/7096/84282/23643/708/51311/91543/7189/7097/64581/5970/11331/11027/929/81622/9111/84868/4153/329/81793/6397/2672/89870/1654/115352/338382/7128/8780/7124/57162/8638/409/64127/23180/3929/51284/857/79132/54726/148022/10333/57402/1535/7105/56927/54106/9867/64922/55366/…
BP	GO:0002831	regulation of response to biotic stimulus	314	0.413451	2.34061	1e-10	2.98969e-09	1.87907e-09	3886	tags=37%, list=15%, signal=32%	1398/2358/59307/4780/26191/1604/3665/5359/2/11213/10666/710/3659/3428/22933/81030/912/2534/3553/10875/5322/3133/80149/654/653361/7099/9450/5272/54941/6372/55601/6352/245928/4938/11326/51191/3594/11117/5336/3134/3600/3106/3125/10125/7001/10225/4067/2268/114836/2219/149628/26057/839/4068/3821/84282/23328/23643/708/8651/7305/51311/7189/115362/64581/661/11126/3824/7294/11027/3823/9111/3565/2627/3902/…
BP	GO:0002285	lymphocyte activation involved in immune response	184	0.440644	2.32296	1e-10	2.98969e-09	1.87907e-09	4330	tags=41%, list=17%, signal=34%	5734/6363/975/3569/942/10875/80149/10892/114548/7099/301/3662/6194/8809/3594/5336/3134/10538/5788/602/139818/114836/4092/4063/8320/6774/64332/2207/972/11151/8741/64218/57089/3958/3565/159296/84868/3122/959/3593/2213/3383/1378/9452/3394/2625/5663/23529/5450/3965/55619/149041/6556/51561/940/6095/911/59067/84807/201294/2185/6688/3142/5105/4818/3109/4064/5873/3456/6845/257101/3071/23075/941/6482/3458
BP	GO:0007051	spindle organization	151	-0.510293	-2.31449	1e-10	2.98969e-09	1.87907e-09	4534	tags=46%, list=18%, signal=38%	225689/84722/347688/26054/81027/4134/9371/80254/203068/114327/10844/4733/5518/11076/11200/27229/440270/23015/8658/5116/8243/8841/3837/284403/3832/1104/10726/7415/3192/4751/2801/7756/55835/5310/10615/259266/55722/83540/6491/9793/55125/8086/26271/9700/22974/1062/27175/7272/24137/57405/3925/29127/29899/891/991/9493/8480/9212/10403/10460/3619/7283/9133/85378/1639/3833/56992/9055/29901/6790
BP	GO:0071248	cellular response to metal ion	179	0.434498	2.30141	1e-10	2.98969e-09	1.87907e-09	3418	tags=32%, list=14%, signal=28%	3726/2354/2353/4780/5743/3725/4499/4502/4493/25932/4494/1544/567/8826/4501/654/653361/4489/5621/288/3162/5336/706/1906/241/143425/120892/1393/10235/1536/151835/5311/23621/30061/4495/358/6609/5176/9451/4496/57586/6622/1740/210/6558/284111/1027/5641/3727/84329/6505/1543/107/2203/3208/29957/3707/83849
BP	GO:0050731	positive regulation of peptidyl-tyrosine phosphorylation	176	0.438204	2.29897	1e-10	2.98969e-09	1.87907e-09	4351	tags=38%, list=17%, signal=32%	3572/975/3569/353514/2534/4908/3084/3059/654/1436/653361/5621/960/6352/3717/5336/7132/3600/55024/79705/1839/7039/3280/5788/4067/148/920/2674/4739/3596/972/64581/5649/916/3565/5175/3593/2322/23529/285489/6850/51561/59067/3263/2185/2915/2621/3082/3589/7124/10507/10006/409/284/64127/90/150/941/84632/3479/5008/7525/2209/2056/2690/3458/3976
BP	GO:0030335	positive regulation of cell migration	465	0.391588	2.29195	1e-10	2.98969e-09	1.87907e-09	4528	tags=36%, list=18%, signal=30%	1398/2358/3037/4780/5743/3725/9510/6363/388/5156/6366/1969/3569/10253/6387/728/4609/3091/7057/56034/64805/7010/63940/7852/3553/10894/4908/80149/5054/6386/1436/7099/91663/57142/81704/1230/301/11170/6352/3717/1236/84913/3162/3676/5336/3554/4316/719/1906/1545/6403/59352/2113/1839/2294/5788/23224/4067/54453/10982/59341/596/2268/5880/659/5530/2247/4739/2152/4846/5294/6774/23328/6504/708/8717/22800/704…
BP	GO:0009636	response to toxic substance	209	0.425152	2.28373	1e-10	2.98969e-09	1.87907e-09	3844	tags=32%, list=15%, signal=27%	2353/4780/5743/11185/4499/4502/22977/4493/4494/4501/4489/10516/4056/6352/5292/2745/65018/1545/241/2098/10549/7001/2643/128/10249/114757/4067/127/7779/64359/596/6280/1193/11093/2950/4495/4846/847/9446/7837/7097/57165/2947/4496/8303/2627/4131/210/6715/6648/8288/1543/6649/1066/29914/4255/9973/10935/4129/6348/7124/5742/2954/2053/5446/23428/4259
MF	GO:0004386	helicase activity	137	-0.507134	-2.27654	1e-10	2.98969e-09	1.87907e-09	5609	tags=56%, list=22%, signal=44%	9557/56919/83990/1974/7486/23064/10847/5982/9879/10521/8607/55636/168400/6832/317781/1660/6597/9775/257218/50485/56897/1653/2547/8438/79039/55661/54555/51750/22907/165545/25788/54505/5976/4175/8449/1763/90957/4173/1108/8458/6596/64794/1663/4176/54821/5983/10111/54606/84515/9716/5985/3070/9401/9704/5984/4172/57634/11325/2071/4343/4174/57680/63922/4171/1656/10721/9400/51428/1659/57647/6499/57696/64…
BP	GO:0045088	regulation of innate immune response	207	0.424451	2.27584	1e-10	2.98969e-09	1.87907e-09	5128	tags=44%, list=20%, signal=36%	1398/2358/4780/26191/3665/5359/2/11213/10666/710/3659/3428/81030/912/2534/5322/3133/653361/7099/5272/6352/4938/11326/5336/3134/3106/10125/10225/4067/2268/114836/2219/149628/839/4068/3821/84282/8651/7305/51311/7189/115362/64581/661/11126/3824/7294/11027/3823/9111/3902/84868/4153/841/9447/3593/85363/2213/329/1378/7520/4332/6850/3965/3055/3805/59067/7376/3263/6688/7128/387837/8780/56253/409/64127/34…
BP	GO:0001525	angiogenesis	467	0.38532	2.26653	1e-10	2.98969e-09	1.87907e-09	4528	tags=34%, list=18%, signal=28%	9314/6347/4780/5743/3725/9510/388/5156/3397/1634/1969/3569/3716/10253/10672/25932/728/3091/7057/133/10365/7010/7852/3553/55273/1893/2022/80149/5054/51330/2658/84870/3164/4804/5547/301/240/6422/55742/11117/3162/5787/718/83854/719/1906/26051/1545/2113/7039/9464/1536/1960/126393/1116/2296/6050/79812/8742/2247/7098/2152/4327/9353/4846/5294/6915/6774/23328/6943/116844/7048/5740/306/358/27286/60675/729…
BP	GO:0006399	tRNA metabolic process	136	-0.505336	-2.26332	1e-10	2.98969e-09	1.87907e-09	6497	tags=49%, list=26%, signal=37%	80222/55520/79042/26610/63899/10667/57570/63892/83707/57038/11340/54802/10248/51728/9330/56931/55140/11062/2193/10940/80745/9836/55621/10799/144233/5441/54938/55798/54901/10056/1653/85495/126789/285605/27304/8270/55278/51654/79897/23395/55226/80746/54522/124454/23404/2976/54517/64118/55157/2972/127253/51367/2975/10785/84267/57176/283989/80324/11180/6894/23438/55687/26024/84705/80755/81605/9328
BP	GO:0000075	cell cycle checkpoint signaling	143	-0.500448	-2.25831	1e-10	2.98969e-09	1.87907e-09	5532	tags=47%, list=22%, signal=37%	83990/7158/5810/11073/9575/80198/1869/79968/1017/135458/545/56155/55743/80254/25896/27339/55055/55159/9344/11200/5591/1112/60561/9656/146956/51720/29935/51343/2177/4436/51514/1111/5514/1763/11130/65123/5883/54962/9319/7756/835/56658/55755/4085/672/699/4193/8914/7272/80279/84126/891/990/81620/1063/9212/10403/9735/57551/7517/29980/84936/8563/51512/84861/641/9984
BP	GO:0050730	regulation of peptidyl-tyrosine phosphorylation	239	0.41049	2.25763	1e-10	2.98969e-09	1.87907e-09	4355	tags=37%, list=17%, signal=31%	9021/3572/64092/975/3569/353514/56034/2534/4908/3084/3059/654/1436/653361/11314/5621/960/6352/3717/6422/5336/7132/3600/55024/79705/1839/7039/3280/5788/57732/4067/148/920/2674/4739/8651/116379/3596/972/64581/56940/5649/916/80310/3565/9467/5175/3593/2322/5663/23529/285489/6850/51561/59067/3689/3263/2185/2915/2621/3082/3589/7124/11006/10507/10006/8692/3574/409/284/64127/90/868/84619/150/941/84632/34…
BP	GO:0043410	positive regulation of MAPK cascade	432	0.389504	2.25631	1e-10	2.98969e-09	1.87907e-09	4493	tags=36%, list=18%, signal=30%	6347/2358/3725/6363/114897/26191/5156/6366/975/3569/7164/10253/353514/728/7057/56034/7010/8826/3553/5322/4908/9770/85458/80149/3084/1902/4889/6386/1436/653361/4616/7099/4615/939/5604/8600/960/1230/6283/3489/6352/8685/3717/1236/3357/6368/5336/1906/55024/388372/10125/10268/10550/120892/7001/7039/5788/57161/9464/148/920/59341/1116/7043/5609/2247/147/7098/5294/23328/6504/7189/414062/972/151/64581/503…
BP	GO:0040017	positive regulation of locomotion	499	0.382861	2.25608	1e-10	2.98969e-09	1.87907e-09	4528	tags=35%, list=18%, signal=29%	1398/2358/3037/4780/5743/3725/9510/6363/388/5156/6366/1969/3569/10253/6387/728/4609/3091/7057/56034/64805/7010/63940/7852/3553/10894/4908/80149/5054/6386/1436/7099/91663/57142/81704/1230/301/11170/6352/3717/1236/84913/3162/3676/5336/3554/4316/719/9806/1906/1545/6403/59352/441531/2113/1839/2294/5788/23224/4067/54453/10982/59341/596/2268/5880/659/5530/2247/4739/2152/9353/4846/5294/6774/23328/6504/7…
BP	GO:2000147	positive regulation of cell motility	485	0.385708	2.25592	1e-10	2.98969e-09	1.87907e-09	4528	tags=35%, list=18%, signal=29%	1398/2358/3037/4780/5743/3725/9510/6363/388/5156/6366/1969/3569/10253/6387/728/4609/3091/7057/56034/64805/7010/63940/7852/3553/10894/4908/80149/5054/6386/1436/7099/91663/57142/81704/1230/301/11170/6352/3717/1236/84913/3162/3676/5336/3554/4316/719/9806/1906/1545/6403/59352/441531/2113/1839/2294/5788/23224/4067/54453/10982/59341/596/2268/5880/659/5530/2247/4739/2152/4846/5294/6774/23328/6504/708/87…
BP	GO:0048285	organelle fission	396	-0.447708	-2.25285	1e-10	2.98969e-09	1.87907e-09	4743	tags=40%, list=19%, signal=33%	2175/1814/79643/56154/10270/245711/225689/84722/347688/1761/55023/317761/391714/9371/5155/27030/64682/10919/56155/84690/55743/138474/3834/9820/57026/192111/5889/51434/4733/55055/8438/652/11022/2253/5518/23310/25836/84057/11200/1164/11144/10419/51547/84930/27127/10928/11105/8658/25936/146956/81930/23236/8243/9088/11077/3837/27085/286053/54332/7329/25788/51343/29893/23126/3209/2177/3832/1104/1111/5…
CC	GO:0098857	membrane microdomain	305	0.401434	2.24963	1e-10	2.98969e-09	1.87907e-09	4514	tags=39%, list=18%, signal=32%	1398/3037/5743/3572/1604/5359/10666/695/4311/7010/2534/925/6386/79054/7133/91663/5621/962/6401/3717/2040/973/3162/7132/1910/824/120892/161003/287/5788/8631/355/4067/148/4118/920/3635/3920/23621/659/914/147/8915/7096/4846/3753/8717/3937/3778/7048/5740/51338/3945/6404/6442/7097/5023/2047/79026/2149/2013/929/23673/931/5175/841/138715/84433/10855/329/3383/7535/1378/5663/3738/119/6505/3055/107/684/592…
CC	GO:0045121	membrane raft	304	0.399083	2.24453	1e-10	2.98969e-09	1.87907e-09	4514	tags=38%, list=18%, signal=32%	1398/3037/5743/3572/1604/5359/10666/695/4311/7010/2534/925/6386/79054/7133/91663/5621/962/6401/3717/2040/973/3162/7132/1910/824/120892/161003/287/5788/8631/355/4067/148/4118/920/3635/23621/659/914/147/8915/7096/4846/3753/8717/3937/3778/7048/5740/51338/3945/6404/6442/7097/5023/2047/79026/2149/2013/929/23673/931/5175/841/138715/84433/10855/329/3383/7535/1378/5663/3738/119/6505/3055/107/684/59272/65…
MF	GO:0005126	cytokine receptor binding	244	0.407687	2.24372	1e-10	2.98969e-09	1.87907e-09	6004	tags=42%, list=24%, signal=32%	6347/6363/3572/6366/3977/3569/3716/8835/6387/9547/3553/1893/2022/4908/10673/6386/4615/8600/6372/6352/3717/3594/4091/6368/10148/3600/2920/388372/3556/8742/4092/7043/7837/8717/116844/7048/9180/7189/3596/414062/729230/8741/3557/7049/3565/65997/841/959/3593/6349/6359/4283/2625/23529/6850/6369/64806/51561/2919/944/59067/9618/6348/3589/7124/6772/3574/6362/3456/4050/5008/6367/2056/4803/3458/3976/8772/29…
BP	GO:0002440	production of molecular mediator of immune response	195	0.423333	2.23663	1e-10	2.98969e-09	1.87907e-09	3860	tags=37%, list=15%, signal=32%	26191/1604/975/3569/942/11213/10666/695/567/3553/3133/7133/10892/114548/7099/8809/3162/5336/3134/3554/3125/9188/10538/5788/10225/4092/7043/54210/7098/8915/3117/6504/91543/7189/3596/972/64581/729230/3113/11126/11331/8741/7805/3565/3119/3115/3122/959/354/3111/2213/1378/1178/2625/23529/3126/3598/684/3805/940/170506/115352/59067/3263/3098/7124/11006/9474/3109/29802/284/64127/3456
BP	GO:0007204	positive regulation of cytosolic calcium ion concentration	285	0.40032	2.23422	1e-10	2.98969e-09	1.87907e-09	3072	tags=28%, list=12%, signal=25%	2357/2358/5732/5734/6363/114897/5156/6366/1604/10672/728/133/2534/7852/5144/1902/5621/27334/1230/3717/1236/3357/2099/5336/2359/719/1906/1910/10268/287/5788/4067/148/59341/596/1193/2841/5311/6288/2247/147/10663/5294/6915/9446/255231/3596/60675/5023/729230/8477/5031/774/185/10800/11151/2854/2149/1043/6622/55584/643/2833/931/126306/2769/27/4283/10803/1240/5020/387129/6546/116/2904/1233/796/2185/801/…
BP	GO:0031348	negative regulation of defense response	211	0.417105	2.23332	1e-10	2.98969e-09	1.87907e-09	4363	tags=39%, list=17%, signal=33%	7538/9021/9314/1398/2358/284207/5734/64838/2/11213/710/3428/22933/3949/7010/2534/10875/3133/4889/7133/8530/114548/5272/54941/240/4938/11326/7132/3134/3106/313/2294/5788/10225/4067/57817/2268/6288/2950/3821/89790/708/5740/116379/3596/5176/3824/325/58189/9111/3565/84868/3593/2213/1378/5925/2625/6850/3965/3055/6397/3805/6095/7376/7128/387837/4790/3082/140885/8780/9474/23208/409/64127/4907/3479/3848/…
BP	GO:0042113	B cell activation	240	0.40597	2.23257	1e-10	2.98969e-09	1.87907e-09	3860	tags=35%, list=15%, signal=30%	64092/975/3569/942/3398/695/3575/678/3543/10673/10892/7099/939/11314/973/6422/3676/5336/55024/10125/677/10538/5788/602/4067/139818/374403/112616/596/3635/54900/23495/7305/640/3596/972/11331/8741/7805/3476/643/3565/931/159296/841/959/84433/2322/2213/7535/1378/22806/9452/4332/3394/23529/5450/6850/55619/149041/684/940/4066/1493/115352/59067/2185/27242/6688/7128/3589/57162/9734/974/472/4064/1316/3574…
BP	GO:1903706	regulation of hemopoiesis	320	0.39317	2.22882	1e-10	2.98969e-09	1.87907e-09	4366	tags=39%, list=17%, signal=32%	7538/2353/6363/3665/942/4609/3659/3398/695/3091/567/864/3575/10875/678/7071/558/9770/80149/639/3059/2124/10892/114548/7099/939/92/8600/1230/301/3662/3594/6422/10288/3600/3106/10125/2113/677/7001/714/5788/4067/1960/920/3635/2737/4092/914/7098/6774/64332/8651/7305/7048/10272/3601/7189/972/729230/9935/2736/325/3565/3902/7107/841/3122/84433/4920/3593/11025/28959/3111/5678/2213/7535/1378/22806/1021/59…
BP	GO:1903046	meiotic cell cycle process	162	-0.486513	-2.22573	1e-10	2.98969e-09	1.87907e-09	6041	tags=51%, list=24%, signal=39%	143471/150280/164045/55124/2827/5885/83990/5810/4438/4292/80198/2175/56154/245711/225689/347688/1761/135458/317761/391714/27030/10919/56155/84690/55743/138474/5889/8438/11022/5518/23310/84057/1164/11144/51547/84930/11105/146956/81930/23236/11077/993/25788/51343/29893/2177/116138/7589/63979/994/29988/995/9918/2801/9319/259266/83540/10111/84501/699/10635/9232/26271/9700/10051/27175/7272/10592/991/8…
BP	GO:0051272	positive regulation of cellular component movement	495	0.377933	2.22398	1e-10	2.98969e-09	1.87907e-09	4528	tags=35%, list=18%, signal=29%	1398/2358/3037/4780/5743/3725/9510/6363/388/5156/6366/1969/3569/10253/6387/728/4609/3091/7057/56034/64805/7010/63940/7852/3553/10894/4908/80149/5054/6386/1436/7099/91663/57142/81704/1230/301/11170/6352/3717/1236/84913/3162/3676/5336/3554/4316/719/9806/1906/1545/6403/59352/441531/2113/1839/2294/5788/23224/4067/54453/10982/59341/596/2268/5880/659/5530/2247/4739/2152/9638/4846/5294/6774/23328/6504/7…
BP	GO:0015931	nucleobase-containing compound transport	182	-0.479077	-2.2189	1e-10	2.98969e-09	1.87907e-09	4064	tags=41%, list=16%, signal=34%	11260/56648/1660/2332/81034/55677/8737/9887/368/9153/10237/143244/84271/4686/11052/10762/8658/2030/8570/57187/5433/60386/10642/3837/29890/55746/5976/10644/54830/23381/65110/51006/29072/6830/9972/1070/65109/59343/65083/9793/10057/23225/8086/215/23511/23165/347734/26993/6573/9883/7248/8480/57122/25909/79023/23089/79228/79902/6311/222962/8021/113829/84912/10643/8563/57510/9631/10128/8106/348995/2601…
BP	GO:0051321	meiotic cell cycle	214	-0.467076	-2.21691	1e-10	2.98969e-09	1.87907e-09	6057	tags=49%, list=24%, signal=37%	164684/143471/150280/164045/55124/132625/55329/2827/5885/83990/5810/4438/4292/85417/80198/2175/1017/56154/245711/225689/347688/1761/5932/7516/135458/317761/391714/27030/10919/56155/84690/55743/138474/10927/10844/5889/8438/11022/5518/23310/84057/1164/27229/11144/51547/84930/27127/11105/140901/146956/81930/23236/8243/9088/11077/993/7156/25788/51343/29893/2177/116138/7589/63979/994/29988/995/9156/55…
BP	GO:0032102	negative regulation of response to external stimulus	356	0.3872	2.20791	1e-10	2.98969e-09	1.87907e-09	4394	tags=36%, list=17%, signal=30%	7538/9021/9314/1398/6347/2358/284207/59307/5734/114897/5156/7056/64838/2/11213/710/3428/22933/7057/3949/7010/2534/10875/22915/3133/5054/4889/7133/8530/114548/5272/54941/240/245928/4938/11326/7132/3134/1906/3106/7001/313/2294/5788/10225/4067/90102/57817/2268/2841/23621/6288/2950/2247/9353/3821/4846/89790/708/5740/116379/3596/928/583/5176/3824/199/325/58189/54361/11027/64218/2160/9111/3565/84868/35…
MF	GO:0030246	carbohydrate binding	228	0.404463	2.2013	1e-10	2.98969e-09	1.87907e-09	3446	tags=32%, list=14%, signal=28%	969/6515/6402/2220/1621/2022/7123/78989/9976/29124/6401/51266/10584/8547/3820/9936/23324/6403/160364/339390/6441/6320/55239/27036/1116/51348/2219/10462/283420/3998/10332/2646/3821/89790/114132/5066/64581/140578/9902/3824/160365/325/3958/10956/7360/3823/2632/51267/10219/6614/4153/3122/50856/5033/1178/5553/5507/945/3965/6652/1203/1462/2203/3101/143903/4065/4125/971/433/387837/3098/8987/721
MF	GO:0005539	glycosaminoglycan binding	207	0.409369	2.19497	1e-10	2.98969e-09	1.87907e-09	5726	tags=43%, list=23%, signal=33%	9510/83716/1634/6402/7057/2022/10894/7123/84870/114548/5621/6372/960/6422/6368/56925/9806/6403/59352/1839/5788/8425/633/1842/5048/6288/2247/9353/708/11167/7048/7097/55576/55959/8828/7049/2160/5549/51144/64094/1809/6359/5553/5118/6649/1462/143903/4753/6146/30008/5764/3098/23166/64388/7058/8692/4018/64127/3075/151887/145864/1289/3990/351/1305/2200/653808/7130/4043/284654/51156/3627/3918/5196/10457/…
BP	GO:0018108	peptidyl-tyrosine phosphorylation	346	0.384966	2.19041	1e-10	2.98969e-09	1.87907e-09	4355	tags=36%, list=17%, signal=30%	9021/3572/5156/64092/1969/975/3569/3716/353514/695/56034/7010/2534/3702/4908/558/3084/3059/654/1436/653361/11314/5621/5604/960/6352/3717/2202/6422/5336/7132/3600/55024/79705/1839/7039/3280/5788/57732/4067/148/920/2268/2674/5609/2042/4739/8651/640/116379/6416/3596/972/64581/56940/2047/5649/916/80310/7294/4750/1195/3565/9467/5175/5606/4920/3593/2322/660/7075/7535/27/5663/23529/285489/6850/1859/1011…
BP	GO:0006397	mRNA processing	348	-0.439077	-2.18611	1e-10	2.98969e-09	1.87907e-09	5574	tags=43%, list=22%, signal=34%	284695/5930/55285/29896/55147/23064/10421/4116/56254/6829/53938/9904/10914/22916/83443/153527/10907/5566/10768/58155/103/23144/151987/9879/403314/51329/29894/10521/8189/8899/23398/1660/8087/2332/55192/84950/55677/8896/9775/51631/25929/6633/10262/79833/22827/84991/27339/6629/23524/3191/904/6827/1653/9924/9733/55339/83759/4686/51692/22913/7072/6627/7737/6631/27336/11052/10419/6628/9128/10915/1479/6…
BP	GO:0030198	extracellular matrix organization	281	0.391344	2.18036	1e-10	2.98969e-09	1.87907e-09	5961	tags=40%, list=24%, signal=31%	3037/4982/9510/83716/5156/3569/4239/1805/1471/25890/2022/165/1308/7133/9719/57188/10516/11117/7132/4316/5768/4060/9806/1545/1520/10549/59277/2294/7373/602/9509/90102/1842/2296/8510/11093/84168/64116/4327/1999/7837/2199/196264/7490/55959/51124/2331/649/51144/10653/64094/4317/5033/7075/10491/1307/4643/5925/1296/1513/81577/4326/255743/2621/30008/7092/7124/8434/23187/7177/1361/858/1281/151887/4016/12…
BP	GO:0010038	response to metal ion	333	0.380042	2.17717	1e-10	2.98969e-09	1.87907e-09	4383	tags=34%, list=17%, signal=29%	3726/2354/2353/4780/5743/3725/4982/5516/4499/4502/4493/5359/25932/4494/3091/7057/1544/567/8826/6279/4501/654/653361/4489/5621/2395/79901/10628/288/3162/5336/706/1906/241/27345/143425/3931/120892/1393/595/10235/1536/3485/57817/7779/596/151835/5311/11093/23621/30061/5530/4495/847/3778/5066/358/6609/366/5176/9451/10243/4496/57586/6622/929/6898/841/1740/210/6558/200894/284111/1027/6648/5641/311/3727/…
BP	GO:0018212	peptidyl-tyrosine modification	349	0.380604	2.17249	1e-10	2.98969e-09	1.87907e-09	4355	tags=36%, list=17%, signal=30%	9021/3572/5156/64092/1969/975/3569/3716/353514/695/56034/7010/2534/3702/4908/558/3084/3059/654/1436/653361/11314/5621/5604/960/6352/3717/2202/6422/5336/7132/3600/55024/79705/1839/7039/3280/5788/57732/4067/148/920/2268/2674/5609/2042/4739/8651/640/116379/6416/3596/972/64581/56940/2047/5649/916/80310/7294/4750/1195/3565/9467/5175/5606/4920/3593/2322/660/7075/7535/27/5663/23529/285489/6850/1859/1011…
BP	GO:0045229	external encapsulating structure organization	284	0.386898	2.16056	1e-10	2.98969e-09	1.87907e-09	5961	tags=40%, list=24%, signal=31%	3037/4982/9510/83716/5156/3569/4239/1805/1471/25890/2022/165/1308/7133/9719/57188/10516/11117/7132/4316/5768/4060/9806/1545/1520/10549/59277/2294/7373/602/9509/90102/1842/2296/8510/11093/84168/64116/4327/1999/7837/2199/196264/7490/55959/51124/2331/649/51144/10653/64094/4317/5033/7075/10491/1307/4643/5925/1296/1513/81577/4326/255743/2621/30008/7092/7124/8434/23187/7177/1361/858/1281/151887/4016/12…
BP	GO:0043062	extracellular structure organization	282	0.388213	2.15854	1e-10	2.98969e-09	1.87907e-09	5961	tags=40%, list=24%, signal=31%	3037/4982/9510/83716/5156/3569/4239/1805/1471/25890/2022/165/1308/7133/9719/57188/10516/11117/7132/4316/5768/4060/9806/1545/1520/10549/59277/2294/7373/602/9509/90102/1842/2296/8510/11093/84168/64116/4327/1999/7837/2199/196264/7490/55959/51124/2331/649/51144/10653/64094/4317/5033/7075/10491/1307/4643/5925/1296/1513/81577/4326/255743/2621/30008/7092/7124/8434/23187/7177/1361/858/1281/151887/4016/12…
MF	GO:0016887	ATP hydrolysis activity	277	-0.442995	-2.15408	1e-10	2.98969e-09	1.87907e-09	6378	tags=49%, list=25%, signal=37%	5706/57674/9044/3508/55582/2068/10856/10694/80179/664618/5702/3305/164045/1662/3308/3796/3329/9557/83473/56919/83990/1974/7486/6683/9361/4292/83858/10847/10131/5982/5395/9879/10521/8607/55636/374654/5190/168400/6832/317781/9371/1660/27030/6597/9775/3834/22836/23095/3313/55210/56897/1653/7203/8438/3326/51182/80224/7184/79039/10525/55661/29028/27127/54555/10939/23195/81930/3309/8243/51750/22907/819…
CC	GO:0005819	spindle	308	-0.437315	-2.15212	1e-10	2.98969e-09	1.87907e-09	2694	tags=31%, list=11%, signal=28%	23331/11076/55920/27229/10928/8658/4957/84942/81930/5303/8243/8841/55200/8317/284403/5905/3832/150465/10726/23384/5607/27436/994/3192/6907/5515/4751/2801/7756/1663/9928/51433/11004/10615/259266/55755/10733/4085/7840/81610/9793/8086/26271/26586/10101/9700/22974/23170/1062/27175/7272/24137/3161/29127/29899/891/991/990/7813/9493/8480/150468/23005/1063/9212/146909/1894/10460/3619/11335/7283/84440/512…
BP	GO:0051480	regulation of cytosolic calcium ion concentration	313	0.373886	2.11158	1e-10	2.98969e-09	1.87907e-09	4653	tags=34%, list=18%, signal=28%	2357/2358/5732/5734/6363/114897/5156/6366/1604/10672/728/133/2534/7852/5144/1902/5621/27334/1230/3717/1236/3357/2099/5336/2359/719/1906/1910/10268/287/5788/4067/148/59341/596/1193/2841/5311/6288/2247/147/10663/5294/6915/9446/255231/3596/60675/5023/729230/8477/5031/774/185/10800/11151/2854/2149/1043/6622/55584/643/2833/931/126306/2769/27/4283/10803/1240/5020/387129/6546/116/2904/1233/796/2185/801/…
BP	GO:0009410	response to xenobiotic stimulus	386	0.363181	2.1032	1e-10	2.98969e-09	1.87907e-09	3831	tags=32%, list=15%, signal=27%	2354/2353/4780/5743/3725/4982/4837/969/5142/4609/7057/1544/316/7852/3553/10/2022/5621/2327/1571/6283/54658/10628/54657/3357/6422/3162/1576/706/27284/1906/1545/1393/1848/1592/7039/8529/595/10249/27063/1536/4067/148/3485/596/590/2950/7098/4824/847/6915/9446/2329/7048/5066/1562/6760/6609/113612/2947/1559/54577/6716/2330/1555/6622/8061/2627/4131/9447/210/6715/7366/6554/1027/1549/6648/9027/7520/5925/8…
CC	GO:0030139	endocytic vesicle	320	0.370281	2.09907	1e-10	2.98969e-09	1.87907e-09	4384	tags=37%, list=17%, signal=31%	55647/8301/9332/567/3949/3575/5322/3133/9482/1902/8417/653361/55788/51762/8685/219972/3134/3106/1520/143425/3125/2934/915/1839/7039/6441/1536/4067/920/54453/30845/5880/10254/3920/83547/6288/7096/3117/4846/6504/7314/5872/7454/11031/10435/4481/306/928/972/9367/7097/55576/3113/11151/6678/1080/917/7431/9135/4689/54361/57089/3107/81622/23673/3119/8773/3115/3122/3136/4920/115677/5289/4643/311/4688/8432…
MF	GO:0140098	catalytic activity, acting on RNA	274	-0.429761	-2.08721	1e-10	2.98969e-09	1.87907e-09	5900	tags=43%, list=23%, signal=33%	1662/55124/83707/57038/129563/54802/56919/83990/1974/81875/10248/51728/84172/10621/56931/51651/9879/11062/2193/10940/2091/80745/9836/55621/10521/340554/168400/10799/6832/23019/144233/317781/1660/5441/54938/9775/122665/167227/131870/117246/55798/5435/54901/10056/1653/56257/9924/85495/51692/79039/5557/55661/4848/54555/285605/5433/5439/64852/22907/25788/54505/246243/5976/27044/8449/8731/328/55278/10…
BP	GO:0008380	RNA splicing	306	-0.422511	-2.08335	1e-10	2.98969e-09	1.87907e-09	4055	tags=35%, list=16%, signal=30%	23398/1660/8087/2332/55192/84950/55677/8896/9775/51631/25929/6633/10081/10262/79833/10199/22827/84991/27339/6629/23524/3191/1653/9733/5518/83759/4686/2521/10137/22913/7072/6627/10922/7737/6631/27336/10419/6628/9128/10915/6732/9130/8570/57187/6100/6634/6636/29890/9406/55280/55131/8449/51340/11338/55596/8175/6830/3192/5515/10921/80746/24144/25766/8458/23076/57819/6635/10992/51645/55796/22794/10946/…
BP	GO:0019932	second-messenger-mediated signaling	270	0.373532	2.08059	1e-10	2.98969e-09	1.87907e-09	3323	tags=29%, list=13%, signal=25%	2357/2358/695/7057/64805/133/7852/55273/5144/3084/79054/1827/5443/5621/8600/1230/6401/2274/4772/5533/1236/3357/5336/1906/1910/2633/6403/5138/120892/287/5788/374403/920/1193/84174/5530/50852/4846/10663/6915/10231/9446/358/64581/729230/185/27115/9451/916/643/6344/2833/51655/283455/5341/9104/7535/10803/6850/1240/29995/6444/107/6546/116/2904/6548/1233/5140/2044/2185/801/2915/3208/58529/6348/7124
BP	GO:0009615	response to virus	345	0.364284	2.07582	1e-10	2.98969e-09	1.87907e-09	4453	tags=36%, list=18%, signal=30%	6363/26191/3569/3665/5359/11213/6387/3659/10346/3428/3091/8575/64135/81030/7852/3553/10875/4939/80149/665/6039/91607/114548/4615/10964/54941/55509/55601/6352/4938/51191/3594/8519/7178/8547/10060/3600/2633/1191/9188/10561/5788/10379/602/3437/6041/596/3459/2268/26057/197259/7098/4599/3764/84282/708/1984/51311/91543/6609/7097/5970/3588/11040/661/11331/5551/1667/81622/1668/9111/3565/8061/10077/9447/3…
BP	GO:0050878	regulation of body fluid levels	354	0.36425	2.07084	1e-10	2.98969e-09	1.87907e-09	6335	tags=44%, list=25%, signal=33%	3037/4780/114897/3572/5156/7056/3569/8835/5359/5588/710/10672/3091/7057/64805/133/22915/7980/558/4939/5054/7099/3717/9060/5329/353/5336/1906/1910/11234/6403/7001/1606/8529/595/4067/59341/11093/6288/3998/4778/2152/4846/5294/6915/7454/5066/640/358/2207/928/151/5023/3083/5567/4883/2158/1080/2149/7294/2013/2160/10077/959/10855/3783/5341/5051/6814/6850/11215/5020/10544/653145/26154/3611/8858/18/7376/5…
BP	GO:0072503	cellular divalent inorganic cation homeostasis	434	0.35195	2.04929	1e-10	2.98969e-09	1.87907e-09	4376	tags=31%, list=17%, signal=26%	2357/2358/5732/5734/6363/114897/5156/6366/1604/9709/4499/4502/4493/10672/6387/4494/728/55858/133/2534/6279/7852/4501/5144/1902/79054/4489/5621/27334/1230/6352/3717/1236/3357/2099/6368/5336/7178/2359/719/1906/1910/10268/287/5788/7052/4067/148/7779/59341/596/6280/1193/2841/5311/6288/2247/147/4495/64116/10663/5294/6915/9446/5910/255231/3596/60675/5023/729230/8477/5031/774/185/10800/11151/2854/2149/4…
BP	GO:0010035	response to inorganic substance	488	0.346431	2.04389	1e-10	2.98969e-09	1.87907e-09	4474	tags=33%, list=18%, signal=28%	3726/2354/1398/2353/4780/5743/3725/4982/6363/388/3569/5516/4499/4502/4493/5359/25932/4494/4609/3091/7057/1544/567/10365/8826/2534/6279/4501/558/80149/654/54407/653361/4489/2308/5621/2395/79901/10516/1571/301/10628/288/1236/3162/5336/65018/706/1906/1910/1545/241/27345/143425/3931/824/120892/1393/7001/2643/595/10235/1536/3485/6523/57817/7779/596/151835/5311/11093/23621/30061/5530/4495/4846/79752/84…
BP	GO:0072507	divalent inorganic cation homeostasis	453	0.347857	2.03935	1e-10	2.98969e-09	1.87907e-09	3088	tags=26%, list=12%, signal=23%	2357/2358/5732/5734/6363/114897/5156/6366/1604/9709/4499/4502/4493/10672/6387/4494/728/55858/133/2534/6279/7852/4501/5144/1902/79054/4489/5621/27334/8600/1230/6352/3717/288/1236/3357/2099/6368/5336/7178/2359/719/1906/1910/10268/287/5788/7052/4067/148/7779/59341/596/6280/1193/2841/5311/6288/2247/147/4495/64116/10663/5294/6915/9446/5910/255231/160335/3596/60675/5023/729230/8477/5031/774/185/10800/1…
BP	GO:0022613	ribonucleoprotein complex biogenesis	312	-0.412828	-2.03494	1e-10	2.98969e-09	1.87907e-09	5475	tags=43%, list=22%, signal=34%	81875/55272/10248/23064/23223/10421/55027/2971/26609/10907/58155/79050/11103/1968/55003/54475/2091/23481/11224/10521/8607/55636/27043/11137/90121/10799/10438/6201/545/6128/7458/317781/1660/84128/6227/6155/55164/9277/9775/51631/25926/25929/25983/8450/6633/131870/117246/79833/10199/22827/285855/1736/64434/27339/10885/79954/29093/1653/6169/3326/9733/84231/23560/4686/79039/64963/51116/6631/5591/55661…
BP	GO:0006325	chromatin organization	417	-0.400363	-2.02419	1e-10	2.98969e-09	1.87907e-09	6056	tags=42%, list=24%, signal=32%	6657/51377/3150/3170/23466/5562/56848/10036/8888/8312/10322/9557/2033/23067/359787/1616/56254/2140/9025/64061/10847/26609/55213/346171/64754/64710/3720/55869/1017/10629/5563/222229/3148/5928/196528/8607/3065/23198/50809/6046/5058/55636/3159/401541/1487/83743/26147/6597/8473/10919/6599/10336/3169/54108/54107/2138/57798/10927/51317/86/257218/79913/6827/4298/23476/27005/55159/9733/6605/84733/79885/8…
BP	GO:0043068	positive regulation of programmed cell death	462	0.342476	2.0072	1e-10	2.98969e-09	1.87907e-09	4614	tags=34%, list=18%, signal=28%	4170/6347/22822/5743/3725/388/3569/7164/8406/4609/22933/8575/7057/81030/133/6279/10439/9770/80149/665/3399/51330/467/7133/4616/3164/2308/29124/5621/4804/9262/301/6194/6352/10628/1540/220/3717/25816/6422/3162/3676/7132/706/1545/7078/10999/1191/10687/824/10550/120892/2934/6154/1848/5788/7052/5915/355/27063/4067/4118/6280/3635/3001/8742/7043/60485/943/23621/839/5609/7098/4824/8915/9353/6477/708/7314…
BP	GO:1901987	regulation of cell cycle phase transition	334	-0.404126	-2.00205	1e-10	2.98969e-09	1.87907e-09	3653	tags=33%, list=15%, signal=29%	80254/7027/8450/80174/163786/25896/27339/5889/51434/23476/10197/55055/56257/55159/9344/1642/51692/55920/11200/5591/7023/1112/60561/9656/146956/51720/23236/134353/27085/286053/993/8317/29935/51343/5933/2177/1029/1019/328/4436/51514/1111/5514/55198/1763/11130/994/252983/995/4221/65123/5883/5515/6868/54962/9319/7756/55835/835/9928/5310/51433/56658/6872/55755/54443/59343/4085/6491/672/699/51529/81610…
BP	GO:0140694	non-membrane-bounded organelle assembly	312	-0.405243	-1.99755	1e-10	2.98969e-09	1.87907e-09	4710	tags=36%, list=19%, signal=30%	79643/1017/1482/5563/54475/225689/347688/2886/26054/81027/23019/6128/9371/80254/203068/70/163786/4205/9898/10844/56478/124093/29093/4733/6169/9924/84231/116840/64963/7072/51116/11200/5591/27229/29777/440270/4848/23015/8658/23195/6713/8243/8841/5601/25914/7429/550/22907/140801/51804/3837/22995/51154/54505/4591/4703/284403/6714/23126/3832/1104/51778/3192/4751/2801/1058/7756/55835/10615/259266/55722…
CC	GO:0043235	receptor complex	389	0.345901	1.99684	1e-10	2.98969e-09	1.87907e-09	5749	tags=36%, list=23%, signal=28%	4982/4306/3572/5156/3977/1969/3569/567/3949/7010/7433/2022/558/925/6386/1436/7133/7099/8807/92/960/8809/3717/3594/3357/973/11117/3676/5787/7132/3680/10148/10268/915/55507/269/8631/4067/5799/920/2674/2568/659/2042/50852/7096/3821/23643/8717/7048/919/9180/7189/972/7097/3560/3588/2047/3824/917/916/8828/55584/929/7049/2675/3561/2059/10077/4920/3593/2322/9358/5678/7075/329/7535/3695/2562/94/6850/3568/…
BP	GO:0006874	cellular calcium ion homeostasis	398	0.345704	1.99265	1e-10	2.98969e-09	1.87907e-09	4653	tags=31%, list=18%, signal=26%	2357/2358/5732/5734/6363/114897/5156/6366/1604/9709/10672/6387/728/55858/133/2534/7852/5144/1902/79054/5621/27334/1230/6352/3717/1236/3357/2099/6368/5336/7178/2359/719/1906/1910/10268/287/5788/7052/4067/148/7779/59341/596/1193/2841/5311/6288/2247/147/10663/5294/6915/9446/5910/255231/3596/60675/5023/729230/8477/5031/774/185/10800/11151/2854/2149/1043/489/6622/55584/643/2833/57419/931/126306/9104/2…
BP	GO:0044770	cell cycle phase transition	443	-0.392011	-1.99095	1e-10	2.98969e-09	1.87907e-09	3653	tags=33%, list=15%, signal=28%	80254/7027/8450/80174/163786/9024/25896/27339/1018/1876/5889/51434/23476/10197/55055/56257/55159/9344/1642/51692/55920/11200/57695/5591/7023/1164/1112/60561/9656/51547/84930/146956/4296/51720/23236/134353/8453/1871/5426/9088/27085/286053/993/8317/29935/51343/5976/7332/5933/2177/1104/1029/1019/328/4436/1033/51514/1111/5514/55198/1763/11130/994/252983/995/4221/65123/5883/5515/1020/6868/6198/54962/9…
BP	GO:0055074	calcium ion homeostasis	410	0.34574	1.99038	1e-10	2.98969e-09	1.87907e-09	4653	tags=31%, list=18%, signal=26%	2357/2358/5732/5734/6363/114897/5156/6366/1604/9709/10672/6387/728/55858/133/2534/7852/5144/1902/79054/5621/27334/8600/1230/6352/3717/1236/3357/2099/6368/5336/7178/2359/719/1906/1910/10268/287/5788/7052/4067/148/7779/59341/596/1193/2841/5311/6288/2247/147/10663/5294/6915/9446/5910/255231/160335/3596/60675/5023/729230/8477/5031/774/185/10800/11151/2854/2149/1043/489/6622/29887/55584/643/2833/57419…
BP	GO:0052547	regulation of peptidase activity	397	0.341191	1.97114	1e-10	2.98969e-09	1.87907e-09	4485	tags=32%, list=18%, signal=27%	9314/5743/2/710/4609/3428/7057/1471/8301/5271/2534/6279/1893/7980/5054/3164/8530/10892/114548/939/5272/5621/960/4804/3717/831/25816/1992/5329/65018/718/56925/9806/7078/10550/83595/2934/355/4067/10010/6280/834/5858/84168/2152/4824/8915/6774/8738/10972/358/83874/64581/5023/64065/5176/51232/6694/9451/5918/5267/2149/256394/7805/1410/489/27141/58189/6622/3476/444/841/10653/128488/9447/10845/1508/329/1…
MF	GO:0140657	ATP-dependent activity	471	-0.383992	-1.96395	1e-10	2.98969e-09	1.87907e-09	6333	tags=41%, list=25%, signal=31%	23461/3508/55582/2068/476/10856/10694/80179/664618/5702/20/3305/164045/1662/3308/1778/197322/3796/3329/10257/9557/83473/56919/83990/1974/7486/23064/6683/2182/9361/4292/83858/10847/10131/527/5982/5395/79784/9879/10521/5928/8607/538/22/55636/7516/374654/5190/399687/127124/168400/6832/1780/196385/317781/9371/1660/27030/6597/9775/3834/70/8735/22836/257218/23095/3313/55210/368/79572/528/9296/50485/487…
BP	GO:0034660	ncRNA metabolic process	408	-0.387544	-1.95539	1e-10	2.98969e-09	1.87907e-09	6163	tags=44%, list=24%, signal=34%	63899/10667/55656/6949/57570/63892/1662/55124/23424/83707/57038/129563/11340/54802/55272/10248/23223/51728/84172/9330/2971/9698/23369/56931/55140/92105/103/79050/11103/7247/11062/2193/10940/2091/80745/9836/23481/55621/11224/10521/80789/55636/55511/27043/11137/90121/10799/389421/10438/144233/6201/317781/84128/5441/6227/57508/6155/6597/54938/55164/4613/8737/9277/9775/54542/25926/25983/10927/25896/4…
BP	GO:0043065	positive regulation of apoptotic process	451	0.332893	1.94652	1e-10	2.98969e-09	1.87907e-09	4614	tags=33%, list=18%, signal=27%	4170/6347/22822/5743/3725/388/3569/7164/8406/4609/22933/8575/7057/81030/133/6279/10439/9770/80149/665/3399/51330/467/7133/4616/3164/2308/29124/5621/4804/9262/301/6194/6352/10628/1540/220/3717/25816/6422/3162/3676/7132/706/1545/7078/10999/1191/10687/824/10550/2934/6154/1848/5788/7052/5915/355/27063/4067/4118/6280/3635/3001/8742/7043/60485/943/23621/839/5609/7098/4824/8915/9353/6477/708/7314/7305/8…
BP	GO:0016570	histone modification	395	-0.386504	-1.94408	1e-10	2.98969e-09	1.87907e-09	5935	tags=38%, list=24%, signal=29%	5562/56848/55124/3141/7443/7703/8888/78990/10322/2033/23067/8202/2641/25855/56254/2140/2005/9025/10847/9575/83443/64754/3720/7874/151987/1017/10629/5563/9426/10270/2091/5928/8607/3065/55758/6877/54531/51366/11137/1487/26147/6885/2332/8473/10919/59336/55677/138474/10336/54107/2138/4801/8450/55100/86/26053/3299/56341/4298/23476/80764/26009/23309/27005/9733/79885/9647/6944/1642/7862/25836/8464/9219/…
BP	GO:0052548	regulation of endopeptidase activity	373	0.338907	1.93784	1e-10	2.98969e-09	1.87907e-09	3567	tags=28%, list=14%, signal=24%	9314/5743/2/710/4609/3428/7057/1471/8301/5271/2534/6279/7980/5054/3164/8530/10892/114548/939/5272/5621/960/4804/3717/831/25816/1992/5329/718/56925/9806/7078/10550/83595/2934/355/4067/6280/834/5858/2152/4824/8915/6774/8738/10972/358/83874/64581/5023/64065/5176/51232/6694/9451/5918/5267/2149/256394/7805/1410/489/27141/58189/6622/3476/444/841/10653/128488/9447/329/1378/5641/6850/3965/5366/6505/65314…
BP	GO:0010817	regulation of hormone levels	453	0.329135	1.92959	1e-10	2.98969e-09	1.87907e-09	5368	tags=35%, list=21%, signal=28%	1958/114897/5156/3569/25976/695/3091/1544/133/3553/654/5443/51762/8600/54658/301/240/27122/6352/220/3717/2099/6422/415116/9060/1576/706/27284/1906/1910/1545/143425/653/1393/125/1592/8425/126/4067/54884/5799/127/5959/59341/3294/590/51170/5530/64577/4824/30812/389434/90007/640/1562/6783/185/1559/1080/54577/6716/3557/54361/8723/51167/130/8773/51144/2028/6715/1508/7366/25924/10599/9227/5947/124/2625/…
MF	GO:0048018	receptor ligand activity	438	0.322842	1.8763	1e-10	2.98969e-09	1.87907e-09	5964	tags=36%, list=24%, signal=28%	6347/284207/4982/6363/6366/10135/3569/6387/56034/9547/133/3553/9535/4908/10673/7472/3084/654/2658/5443/8600/6372/6352/90865/2202/6368/10584/10148/2797/1906/3600/2920/388372/653/1839/7039/6320/112616/57817/8742/7043/5173/2247/10435/3596/414062/80310/8741/9135/3557/3603/54361/64218/3958/649/3565/146225/959/3593/6349/2250/6359/4283/23529/92304/114900/5020/10447/7484/6369/5368/64806/51561/116/7076/57…
MF	GO:0030546	signaling receptor activator activity	445	0.32206	1.87294	1e-10	2.98969e-09	1.87907e-09	5964	tags=36%, list=24%, signal=28%	6347/284207/4982/6363/6366/10135/3569/6387/56034/9547/133/3553/9535/4908/10673/7472/3084/654/2658/5443/8600/6372/6352/90865/2202/6368/10584/10148/2797/1906/3600/2920/388372/653/1839/7039/6320/112616/57817/8742/7043/5173/659/2247/10435/3596/414062/80310/8741/9135/3557/3603/54361/64218/3958/649/3565/146225/959/3593/6349/2250/6359/4283/23529/92304/114900/5020/10447/7484/6369/5368/64806/51561/116/707…
BP	GO:1901652	response to peptide	445	0.321975	1.87245	1e-10	2.98969e-09	1.87907e-09	5078	tags=35%, list=20%, signal=28%	9021/1398/2358/1958/1959/4780/5743/26191/3397/837/3716/8835/5588/6387/4609/133/10365/2534/3553/3164/7099/2308/5443/51762/5621/4804/301/3717/3676/353/1906/51510/23484/1910/1545/10999/7832/677/10268/1393/55022/51141/1536/4067/9349/6775/59341/23621/5791/847/6774/4149/5872/8651/11031/8615/23191/7097/5970/760/23038/774/185/5176/8462/6716/7431/7049/3488/4131/896/6715/2213/1027/3383/5166/5641/79746/5925…
MF	GO:0030545	signaling receptor regulator activity	472	0.316805	1.86541	1e-10	2.98969e-09	1.87907e-09	5964	tags=36%, list=24%, signal=28%	6347/284207/4982/6363/6366/4061/10135/3569/6387/56034/9547/133/3553/9535/4908/10673/7472/3084/654/2658/5443/8600/6372/27122/6352/90865/2202/6368/10584/10148/2797/1906/3600/2920/388372/160364/653/1839/7039/6320/112616/57817/8742/7043/5173/659/2247/7837/10435/3596/414062/80310/8741/9135/3557/3603/54361/64218/3958/649/2339/3565/146225/959/3593/6349/2250/6359/4283/23529/92304/114900/5020/10447/7484/6…
BP	GO:0019722	calcium-mediated signaling	181	0.427636	2.26086	1.07565e-10	3.20362e-09	2.01353e-09	3323	tags=34%, list=13%, signal=30%	2358/695/64805/7852/55273/3084/79054/1827/5443/5621/8600/1230/6401/2274/4772/5533/1236/3357/5336/1906/1910/2633/6403/120892/287/5788/374403/920/1193/84174/5530/50852/10663/10231/9446/64581/729230/185/9451/916/643/2833/283455/5341/9104/7535/10803/6850/1240/29995/6444/6546/2904/6548/1233/2185/801/2915/3208/58529/6348/7124
BP	GO:0043299	leukocyte degranulation	72	0.587725	2.64512	1.09977e-10	3.26306e-09	2.05088e-09	5078	tags=62%, list=20%, signal=50%	695/5730/11314/3162/3134/10125/2294/4067/2268/5880/5294/640/306/3596/729230/11151/5724/8723/3565/8773/84106/2213/8832/6814/6850/3965/3055/3598/6844/201294/3689/6688/6348/4818/6284/3684/5873/5293/6845/3071/5729/3822/7462/3566/634
BP	GO:0032755	positive regulation of interleukin-6 production	85	0.553381	2.59208	1.11722e-10	3.30232e-09	2.07556e-09	4982	tags=54%, list=20%, signal=44%	3569/353514/64135/3553/7099/4615/90865/5336/10288/3556/59341/7098/8915/7096/6774/7305/51311/7189/972/7097/64581/2149/199/5724/3603/11027/4317/5450/6850/3965/114900/338382/7124/5452/8692/64127/351/3929/51284/3458/10865/64170/148022/10333/23765/1535
BP	GO:0032732	positive regulation of interleukin-1 production	66	0.608473	2.68523	1.13235e-10	3.33448e-09	2.09577e-09	4861	tags=55%, list=19%, signal=44%	1958/6363/3569/353514/3428/10892/114548/7099/4615/3717/834/149628/6288/6774/7305/51311/10972/115362/64581/3603/11027/84868/841/9447/4332/3965/24145/6348/3098/7124/6284/64127/351/3458/91662/10333
BP	GO:0002444	myeloid leukocyte mediated immunity	94	0.533404	2.51398	1.16853e-10	3.42811e-09	2.15462e-09	5012	tags=55%, list=20%, signal=44%	3569/695/3133/5730/4615/11314/5272/6372/3162/718/10125/9188/2294/4067/1776/2268/5880/54210/5294/7305/640/306/3596/729230/5724/8723/3565/8773/84106/2213/8832/6814/6850/3965/3598/6844/170506/201294/3689/6688/6348/6284/3684/9948/5293/6845/2209/5729/64170/148022/7462/3566
BP	GO:0006403	RNA localization	162	-0.480952	-2.20029	1.20755e-10	3.52937e-09	2.21826e-09	4064	tags=41%, list=16%, signal=35%	11260/56648/545/1660/2332/55164/55677/167227/9887/3182/1736/7203/143244/84271/4686/11052/10762/8658/8570/57187/5433/10642/3837/29890/55746/5976/10644/54830/23381/65110/29072/6830/3192/9972/1070/65109/22794/59343/65083/9793/23225/8086/23511/23165/26993/9883/10575/7248/8480/57122/25909/79023/23089/79228/79902/6311/8021/10643/8563/57510/9631/10128/8106/348995/26019/7514/9984
BP	GO:0002573	myeloid leukocyte differentiation	193	0.411064	2.17166	1.30233e-10	3.79226e-09	2.38349e-09	3338	tags=35%, list=13%, signal=31%	3726/2353/3725/6363/1969/975/3665/4609/3398/3428/7071/9770/3059/1436/2124/7099/8600/55509/1230/3662/25979/1236/6422/3600/677/79705/714/10538/4067/920/3635/5048/7098/4495/10100/7305/7048/10272/7189/972/7097/9935/325/29887/3565/159296/7107/841/4920/3593/11025/139716/1021/5925/4055/2625/5663/22904/116071/64806/51561/3694/998/6688/10234/6348/7124/11006
BP	GO:0010965	regulation of mitotic sister chromatid separation	60	-0.636804	-2.50135	1.35455e-10	3.9297e-09	2.46988e-09	2019	tags=45%, list=8%, signal=41%	286053/11130/9319/7756/51433/55755/4085/699/51529/9232/26271/9700/1062/7272/891/990/81620/29945/1063/9212/10403/10460/9735/7517/11065/84861/8697
BP	GO:1902850	microtubule cytoskeleton organization involved in mitosis	128	-0.511597	-2.26892	1.48783e-10	4.30042e-09	2.70288e-09	2993	tags=40%, list=12%, signal=35%	4733/23291/11200/8658/5116/8243/3837/284403/3832/1104/55968/10726/7415/29072/3192/4751/2801/1058/7756/5310/55755/4085/83540/6491/9793/55125/8086/9700/22974/1062/27175/7272/24137/57405/3925/29127/29899/891/991/9493/8480/9212/10403/10460/7283/51203/1639/3833/56992/9055/6790
BP	GO:2000514	regulation of CD4-positive, alpha-beta T cell activation	60	0.615388	2.6856	1.52306e-10	4.38608e-09	2.75672e-09	3113	tags=50%, list=12%, signal=44%	6363/1604/975/942/5588/864/80149/10892/114548/301/3662/3594/3125/4092/64332/8651/7048/11126/3565/3122/3593/57045/2625/9308/3965/149041/51561/84807/3142/865
BP	GO:0007052	mitotic spindle organization	105	-0.535691	-2.31469	1.53647e-10	4.4085e-09	2.77081e-09	2599	tags=40%, list=10%, signal=36%	11200/8658/5116/8243/3837/284403/3832/1104/10726/7415/3192/4751/2801/7756/5310/83540/6491/9793/55125/8086/22974/1062/27175/7272/24137/57405/3925/29127/29899/891/991/9493/8480/9212/10403/10460/7283/1639/3833/56992/9055/6790
BP	GO:0098754	detoxification	121	0.486741	2.41317	1.63454e-10	4.67275e-09	2.93689e-09	3451	tags=34%, list=14%, signal=29%	4780/5743/4499/4502/22977/4493/4494/4501/4489/10516/4056/5292/2745/241/2098/10549/7001/2643/128/114757/127/7779/64359/6280/1193/2950/4495/4846/847/9446/7837/2947/4496/6648/8288/6649/29914/9973/10935/5742/2954
BP	GO:0045058	T cell selection	46	0.66936	2.76827	1.82254e-10	5.19127e-09	3.26279e-09	3417	tags=63%, list=14%, signal=55%	3569/912/3662/1236/3594/3600/915/10538/5788/920/1794/596/114836/2737/64919/4063/6774/972/917/916/84433/3593/7535/2625/6850/51561/940/9474/3707
BP	GO:0045619	regulation of lymphocyte differentiation	169	0.434974	2.25889	1.8479e-10	5.22548e-09	3.28429e-09	4330	tags=43%, list=17%, signal=36%	6363/942/3659/3398/695/864/3575/10875/678/558/80149/639/10892/114548/939/301/3662/3594/6422/10288/3600/10125/677/7001/5788/1960/3635/2737/4092/914/64332/8651/7048/3601/972/729230/2736/3565/3902/3122/84433/3593/3111/5678/7535/1378/22806/2625/9308/6850/3965/149041/51561/940/1493/115352/84807/3142/865/2621/11006/5105/3707/56253/3574/55012/3456/257101/3071/941/6647/3458
BP	GO:0044772	mitotic cell cycle phase transition	363	-0.389145	-1.94339	1.84157e-10	5.22548e-09	3.28429e-09	3599	tags=33%, list=14%, signal=29%	7027/8450/80174/163786/9024/1018/1876/5889/51434/23476/10197/55055/56257/55159/9344/1642/51692/55920/11200/57695/5591/7023/1164/1112/60561/51547/84930/51720/23236/134353/8453/1871/5426/9088/27085/286053/993/8317/51343/5933/1104/1029/1019/328/1033/51514/1111/55198/11130/994/995/65123/5515/1020/6868/6198/9319/7756/55835/835/9928/5310/51433/56658/55755/54443/59343/4085/6491/672/699/51529/25942/57504…
BP	GO:0070098	chemokine-mediated signaling pathway	79	0.557709	2.56194	1.91507e-10	5.39595e-09	3.39143e-09	5612	tags=59%, list=22%, signal=46%	6347/6363/6366/6387/3091/7852/6372/1230/6352/1236/6368/1906/2920/388372/2296/9353/10663/414062/729230/643/2833/6349/6359/4283/10803/1240/6369/2919/1233/2185/6348/6362/11240/6367/4352/2921/10936/1232/10019/6361/6360/3627/5196/7032/6373/6586/6355
BP	GO:0031663	lipopolysaccharide-mediated signaling pathway	58	0.624042	2.71466	1.94266e-10	5.45408e-09	3.42797e-09	3634	tags=57%, list=14%, signal=49%	6347/59307/26191/1604/3553/654/10892/7099/4615/9450/6352/245928/5336/7001/4067/8915/4846/23328/23643/7189/7097/923/5724/11027/929/85363/3055/6688/7128/6348/7124/4064/92140
BP	GO:0022408	negative regulation of cell-cell adhesion	169	0.434101	2.25436	2.04114e-10	5.71008e-09	3.58887e-09	6252	tags=52%, list=25%, signal=39%	9314/114897/26191/6366/942/6387/3659/864/10875/80149/654/91663/11314/5621/301/3717/11326/10288/7001/339390/6441/59341/2737/54900/4092/2615/8651/53827/928/972/79679/56940/3557/7805/3958/3565/3902/84868/80709/10653/80380/2213/1378/57045/375056/3965/26154/149041/9306/18/1493/27242/6688/3142/865/57162/11006/56253/3456/868/8379/3071/23075/941/79626/10019/3566/634/1051/84524/10457/1511/445/5771/650/335…
MF	GO:0003823	antigen binding	57	0.626203	2.70228	2.05202e-10	5.72009e-09	3.59516e-09	3309	tags=51%, list=13%, signal=44%	4239/912/3575/2220/3543/3133/962/3676/3134/8547/3106/3125/2219/10332/3117/6504/3113/3824/11027/3107/3119/3115/3902/3122/3136/3804/911/913/140885
BP	GO:0002687	positive regulation of leukocyte migration	132	0.477416	2.40628	2.06817e-10	5.74467e-09	3.61061e-09	4140	tags=41%, list=16%, signal=34%	2358/6363/6366/3569/6387/728/7057/64805/63940/10894/5054/1436/81704/1230/6352/1236/3676/3554/719/1906/6403/59341/5880/6504/708/972/729230/199/80310/5724/3958/3565/3383/5641/961/375056/1240/3965/6369/51561/2529/2185/6688/245937/2621/5764/58494/6348/7124/3071/23075/83700/351/3929
BP	GO:0051052	regulation of DNA metabolic process	375	-0.381276	-1.9089	2.55127e-10	7.06153e-09	4.43828e-09	5242	tags=39%, list=21%, signal=31%	4292/9025/64061/5893/50507/219736/3838/5982/64710/55869/11284/7874/151987/1017/56154/225689/79733/196528/8550/8607/51053/5932/253980/1161/51366/5558/545/1660/5155/3060/10919/2187/54108/54107/7027/2138/80174/167227/55100/86/25792/3586/84309/11124/79913/1736/3776/7335/50485/7037/56897/64110/7203/51659/3326/5518/6944/7515/23560/2521/81931/84296/57695/5591/10419/51547/11105/8658/30968/7270/51720/5175…
BP	GO:0042742	defense response to bacterium	241	0.380362	2.0949	2.60694e-10	7.19019e-09	4.51914e-09	4239	tags=31%, list=17%, signal=26%	2358/1969/3569/728/22933/3575/2220/51316/6279/3543/3133/4939/5054/6039/7099/4615/6372/5199/6283/245928/4938/11117/219972/7132/6403/602/6441/57817/920/6280/2268/26057/54210/7098/245939/306/358/2207/7097/55576/820/11126/4069/163351/115361/1667/1668/84868/4153/128488/3593/354/5320/5553/3394/6850/8288/6556/51561/944/245937/10406/7124/23166/6590/84034/23208/116842/64127/1669/3240/388646/3929/100507436…
BP	GO:0051028	mRNA transport	105	-0.529926	-2.28978	3.03442e-10	8.33986e-09	5.24172e-09	2865	tags=47%, list=11%, signal=42%	56648/1660/2332/55677/9887/143244/84271/4686/10762/8658/8570/57187/5433/10642/29890/55746/5976/10644/23381/65110/29072/6830/9972/1070/65109/59343/23225/8086/23511/23165/26993/9883/8480/57122/25909/79023/23089/79228/79902/8021/10643/8563/9631/10128/8106/348995/26019/7514/9984
BP	GO:0050657	nucleic acid transport	130	-0.509636	-2.26075	3.11077e-10	8.49013e-09	5.33617e-09	2865	tags=40%, list=11%, signal=36%	143244/84271/4686/11052/10762/8658/8570/57187/5433/10642/3837/29890/55746/5976/10644/54830/23381/65110/29072/6830/9972/1070/65109/59343/65083/9793/23225/8086/23511/23165/26993/9883/7248/8480/57122/25909/79023/23089/79228/79902/6311/8021/10643/8563/57510/9631/10128/8106/348995/26019/7514/9984
BP	GO:0050658	RNA transport	130	-0.509636	-2.26075	3.11077e-10	8.49013e-09	5.33617e-09	2865	tags=40%, list=11%, signal=36%	143244/84271/4686/11052/10762/8658/8570/57187/5433/10642/3837/29890/55746/5976/10644/54830/23381/65110/29072/6830/9972/1070/65109/59343/65083/9793/23225/8086/23511/23165/26993/9883/7248/8480/57122/25909/79023/23089/79228/79902/6311/8021/10643/8563/57510/9631/10128/8106/348995/26019/7514/9984
BP	GO:0001913	T cell mediated cytotoxicity	46	0.663786	2.74522	3.20161e-10	8.7077e-09	5.47292e-09	5128	tags=65%, list=20%, signal=52%	567/912/3575/3133/8417/3594/3134/3106/5788/3821/3824/5551/2013/3122/3136/3593/2213/1075/51561/911/913/5873/5532/3071/100507436/8772/11035/3140/634/3105
BP	GO:0030168	platelet activation	122	0.47338	2.35288	3.32409e-10	9.00956e-09	5.66264e-09	4267	tags=39%, list=17%, signal=32%	114897/3572/5156/7056/3569/5359/5588/10672/64805/22915/558/7099/3717/5336/6403/1606/4067/11093/6288/4846/5294/640/2207/928/151/5023/2149/7294/10077/959/5341/6814/6850/3611/18/2316/7414/84034/375033/10398/3932/2811/1281/83706/150/71/4352
BP	GO:0007091	metaphase/anaphase transition of mitotic cell cycle	58	-0.636054	-2.47672	3.69203e-10	9.97231e-09	6.26775e-09	2019	tags=52%, list=8%, signal=48%	64682/56155/51434/55055/286053/11130/9319/7756/51433/55755/4085/699/51529/26271/9700/1062/7272/891/990/81620/29945/1063/9212/10403/10460/9735/7517/11065/84861/8697
BP	GO:0007346	regulation of mitotic cell cycle	398	-0.372284	-1.87413	3.78524e-10	1.01889e-08	6.4039e-09	3868	tags=33%, list=15%, signal=29%	10011/56155/23513/55743/3169/9820/8729/57026/7027/8450/80174/163786/3586/4212/5727/5889/51434/23476/10197/55055/56257/652/55159/9344/2253/1642/51692/23331/55920/11200/5591/7023/1164/1112/1845/10419/60561/9656/146956/51720/23236/134353/9088/27085/286053/993/8317/51343/284403/3209/5933/2177/1104/1029/1019/328/4436/51514/1111/150465/5514/55198/11130/994/995/26574/3192/65123/5883/5515/4751/6868/15731…
BP	GO:0032602	chemokine production	87	0.53212	2.51255	3.94326e-10	1.05779e-08	6.64838e-09	5012	tags=52%, list=20%, signal=42%	9314/1958/9173/59307/1969/3569/3091/3553/1436/7099/4615/6372/4938/90865/3162/59341/54210/2950/7098/255231/972/7097/64581/199/84868/8832/6850/3965/1654/116/245937/140885/7124/11006/3574/64127/351/3929/51284/3458/6591/64170/148022/23765/3566
BP	GO:0140013	meiotic nuclear division	145	-0.48887	-2.20964	4.13733e-10	1.10607e-08	6.95179e-09	6041	tags=51%, list=24%, signal=39%	143471/150280/164045/55124/2827/5885/83990/5810/4438/4292/80198/2175/56154/245711/225689/347688/1761/317761/391714/27030/10919/56155/84690/55743/138474/5889/8438/11022/5518/84057/1164/11144/51547/84930/11105/146956/81930/23236/11077/25788/51343/29893/2177/116138/7589/63979/994/29988/2801/9319/259266/83540/10111/84501/699/10635/9232/26271/9700/10051/7272/10592/991/898/10403/3619/9133/29781/80010/2…
BP	GO:0033045	regulation of sister chromatid segregation	66	-0.607628	-2.44396	4.39559e-10	1.17111e-08	7.36061e-09	3893	tags=50%, list=15%, signal=42%	64682/56155/55743/51434/55055/286053/11130/3192/9319/7756/51433/55755/4085/699/51529/9232/26271/9700/1062/7272/891/990/81620/29945/1063/9212/10403/10460/9735/7517/11065/84861/8697
BP	GO:0030071	regulation of mitotic metaphase/anaphase transition	56	-0.639345	-2.48081	4.57506e-10	1.21479e-08	7.63516e-09	2019	tags=48%, list=8%, signal=44%	51434/55055/286053/11130/9319/7756/51433/55755/4085/699/51529/26271/9700/1062/7272/891/990/81620/29945/1063/9212/10403/9735/7517/11065/84861/8697
CC	GO:0005657	replication fork	49	-0.661564	-2.50106	4.59124e-10	1.21497e-08	7.63628e-09	6150	tags=73%, list=24%, signal=56%	56852/5111/11277/7486/7158/83637/5982/7516/5558/51368/50485/5889/10714/5557/29128/29935/1111/54962/1786/11169/55388/5983/5985/9031/55929/8914/5984/4172/5981/5424/5422/7517/29980/23649/641/80119
BP	GO:1903038	negative regulation of leukocyte cell-cell adhesion	119	0.477678	2.36645	4.6352e-10	1.22247e-08	7.68344e-09	4115	tags=42%, list=16%, signal=35%	9314/26191/6366/942/6387/3659/864/10875/80149/11314/5621/301/11326/10288/7001/339390/6441/2737/54900/4092/2615/8651/972/79679/56940/7805/3958/3565/3902/84868/80380/2213/1378/57045/375056/3965/149041/9306/1493/27242/3142/865/57162/11006/56253/3456/868/8379/3071/941
BP	GO:0033674	positive regulation of kinase activity	424	0.31368	1.81171	4.66145e-10	1.22527e-08	7.70102e-09	4502	tags=33%, list=18%, signal=27%	2358/1958/6363/5156/6366/1969/975/7164/10253/942/353514/7057/56034/64805/7010/8826/3553/4908/558/9770/3084/1436/653361/10892/7099/11314/5621/5604/8600/6283/6352/3717/1236/3357/65018/1906/1191/10125/120892/1839/7039/55507/5788/595/4067/148/920/1116/2268/5311/659/5609/2042/2247/7098/5903/4739/8915/5294/23328/8651/3937/7048/7189/972/151/2047/5649/11331/23533/80310/894/2013/6622/3565/81617/8543/5606/…
BP	GO:0071260	cellular response to mechanical stimulus	65	0.592268	2.60228	5.2629e-10	1.37874e-08	8.66558e-09	5116	tags=58%, list=20%, signal=47%	5743/5734/3659/3553/2022/654/54407/7099/4615/7132/5138/355/27063/834/943/9531/7098/8915/1265/51311/8738/358/6416/3596/841/4055/6548/4790/2729/8797/3480/51284/5599/8772/4214/1535/10746/1647
BP	GO:0001912	positive regulation of leukocyte mediated cytotoxicity	53	0.626598	2.67432	5.37879e-10	1.4044e-08	8.82688e-09	4685	tags=58%, list=19%, signal=48%	10666/567/912/3133/8417/3594/3134/3106/10125/5788/114836/4068/7305/11126/3824/3823/3902/3122/3136/3593/51561/911/59067/913/6688/56253/3684/8772/8302/3822/3140
BP	GO:0032731	positive regulation of interleukin-1 beta production	56	0.623175	2.672	5.66124e-10	1.47324e-08	9.25953e-09	4861	tags=55%, list=19%, signal=45%	1958/6363/3569/353514/3428/10892/114548/7099/4615/3717/834/149628/6774/7305/51311/115362/64581/11027/841/9447/4332/3965/24145/6348/3098/7124/64127/351/3458/91662/10333
CC	GO:0005681	spliceosomal complex	152	-0.47468	-2.15193	5.90888e-10	1.53259e-08	9.63257e-09	5529	tags=45%, list=22%, signal=36%	55285/29896/4116/53938/83443/153527/10907/58155/103/8899/23398/55192/84950/8896/9775/51631/6633/10081/10262/84991/27339/6629/23524/22913/6627/7737/6631/27336/6628/9128/6634/165545/6636/55280/5976/55131/8449/51340/11338/151903/55596/8175/3192/24144/25766/8458/57819/6635/10992/51645/22794/10946/9129/55094/9716/55696/55954/26121/6637/9343/25804/79706/23759/6626/51428/1659/10713/9416/60625
BP	GO:0000377	RNA splicing, via transesterification reactions with bulged adenosine as nucleophile	221	-0.429533	-2.04245	6.03154e-10	1.55411e-08	9.76783e-09	5529	tags=42%, list=22%, signal=33%	55285/29896/55147/23064/10421/4116/53938/9904/22916/83443/153527/10907/58155/9879/10521/8899/23398/1660/8087/2332/55192/84950/8896/9775/51631/25929/6633/10262/79833/22827/84991/27339/6629/23524/3191/1653/9733/83759/4686/22913/7072/6627/7737/6631/27336/10419/6628/9128/6732/6634/6636/29890/55280/8449/51340/11338/55596/8175/3192/10921/24144/25766/57819/6635/10992/51645/55796/22794/10946/9129/55094/5…
BP	GO:0000398	mRNA splicing, via spliceosome	221	-0.429533	-2.04245	6.03154e-10	1.55411e-08	9.76783e-09	5529	tags=42%, list=22%, signal=33%	55285/29896/55147/23064/10421/4116/53938/9904/22916/83443/153527/10907/58155/9879/10521/8899/23398/1660/8087/2332/55192/84950/8896/9775/51631/25929/6633/10262/79833/22827/84991/27339/6629/23524/3191/1653/9733/83759/4686/22913/7072/6627/7737/6631/27336/10419/6628/9128/6732/6634/6636/29890/55280/8449/51340/11338/55596/8175/3192/10921/24144/25766/57819/6635/10992/51645/55796/22794/10946/9129/55094/5…
BP	GO:0045766	positive regulation of angiogenesis	145	0.447992	2.28559	6.13438e-10	1.57028e-08	9.86945e-09	2748	tags=31%, list=11%, signal=28%	9314/4780/388/3716/728/3091/7057/133/7010/7852/3553/1893/2022/80149/5054/2658/3162/718/719/1545/2113/1536/126393/1116/8742/2247/7098/2152/4846/6915/6774/23328/116844/7048/5740/306/358/10800/820/2627/64094/7075/94/6369/168667
BP	GO:1904018	positive regulation of vasculature development	145	0.447992	2.28559	6.13438e-10	1.57028e-08	9.86945e-09	2748	tags=31%, list=11%, signal=28%	9314/4780/388/3716/728/3091/7057/133/7010/7852/3553/1893/2022/80149/5054/2658/3162/718/719/1545/2113/1536/126393/1116/8742/2247/7098/2152/4846/6915/6774/23328/116844/7048/5740/306/358/10800/820/2627/64094/7075/94/6369/168667
BP	GO:0002833	positive regulation of response to biotic stimulus	162	0.430781	2.22336	6.23629e-10	1.59117e-08	1.00007e-08	5100	tags=46%, list=20%, signal=37%	2358/3665/5359/10666/3428/81030/912/2534/5322/3133/654/7099/9450/55601/6352/11117/5336/3134/3125/10125/4067/114836/2219/149628/26057/839/4068/23328/23643/7305/51311/7189/115362/64581/661/11126/3824/7294/11027/3823/9111/3902/84868/4153/9447/3593/85363/354/7520/4332/6850/3055/89870/3805/59067/3263/6688/8780/8638/56253/4064/84034/64127/3456/3929/8772/8302/3822/3140/79132/64170/3551/1535/117157/55223
BP	GO:1901653	cellular response to peptide	327	0.337977	1.92421	6.31625e-10	1.60634e-08	1.00961e-08	5137	tags=38%, list=20%, signal=30%	9021/1398/2358/4780/26191/3397/837/3716/8835/5588/4609/10365/2534/3553/3164/7099/2308/51762/5621/4804/3717/3676/353/1906/51510/23484/1545/10999/677/1393/55022/51141/4067/9349/23621/5791/6774/4149/5872/8651/11031/8615/23191/5970/760/23038/185/8462/7431/4131/896/6715/2213/3383/5166/5641/79746/5925/5663/51274/376497/6844/2529/6548/2203/5140/81565/2915/3416/55625/6653/4790/55777/7124/5105/23641/5327/…
BP	GO:0009612	response to mechanical stimulus	187	0.408536	2.16123	6.35978e-10	1.61217e-08	1.01327e-08	5116	tags=41%, list=20%, signal=33%	2354/2353/5743/3725/5734/6387/3659/7057/2534/7852/3553/2022/654/54407/7099/4615/10628/7132/1906/7832/5138/2934/355/27063/3485/59341/1116/834/5311/943/9531/23621/7098/8915/1265/7048/51311/8738/358/54532/6416/3596/5970/55584/8061/4131/841/3727/4055/6546/6548/2185/4790/5764/7124/2729/8797/10370/6772/117532/9378/71/3480/3741/51284/5599/1813/8772/4313/8932/4214/6869/3627/1535/10746/1647
BP	GO:0051236	establishment of RNA localization	133	-0.502173	-2.24079	6.49855e-10	1.64204e-08	1.03204e-08	4064	tags=44%, list=16%, signal=37%	11260/56648/545/1660/2332/55677/9887/143244/84271/4686/11052/10762/8658/8570/57187/5433/10642/3837/29890/55746/5976/10644/54830/23381/65110/29072/6830/9972/1070/65109/59343/65083/9793/23225/8086/23511/23165/26993/9883/7248/8480/57122/25909/79023/23089/79228/79902/6311/8021/10643/8563/57510/9631/10128/8106/348995/26019/7514/9984
BP	GO:0071496	cellular response to external stimulus	268	0.361515	2.01131	6.70985e-10	1.68998e-08	1.06218e-08	4465	tags=35%, list=18%, signal=29%	2353/81631/4780/5743/5734/3659/3428/3553/2022/7071/558/80149/654/54407/467/7099/2308/4615/11170/23710/5292/6422/3162/3676/7132/3600/51100/5138/120892/11345/5788/355/27063/220441/4067/596/834/3920/943/9531/659/7098/8915/29103/1265/2350/4149/51311/8738/358/6416/3596/9451/199/54361/4330/81788/8061/841/6715/5166/5289/4055/5366/11337/7484/6548/22938/1312/2621/978/10670/55062/4790/5105/9474/968/6506/27…
BP	GO:0007249	I-kappaB kinase/NF-kappaB signaling	257	0.366745	2.03004	6.99691e-10	1.75663e-08	1.10407e-08	5351	tags=42%, list=21%, signal=33%	6363/6366/10346/695/2534/3553/1893/80149/5966/1902/10892/7099/4615/8600/6283/1236/3357/54386/2099/3162/5336/7132/65018/1906/1910/10549/9188/602/57161/10010/28512/920/834/26057/2950/7098/8915/8717/51311/9100/5494/57153/7189/972/7097/64581/5970/11040/2149/841/79753/84433/85363/329/4055/54469/3965/5187/684/9516/170506/6095/54602/9618/1491/245937/7128/57708/6275/140885/8780/7124/57162/11006/4793/2316…
BP	GO:1902107	positive regulation of leukocyte differentiation	145	0.446164	2.27627	7.88704e-10	1.96749e-08	1.2366e-08	4612	tags=46%, list=18%, signal=37%	2353/6363/942/3398/695/864/3575/7071/558/3059/2124/10892/114548/939/8600/1230/301/3594/10288/3600/10125/677/5788/1960/920/3635/2737/64332/8651/7305/7048/3601/7189/972/2736/3565/841/3122/4920/3593/7535/1378/5925/2625/9308/6850/3965/51561/84807/3142/865/2621/7124/11006/5105/3707/3574/55012/3071/941/169200/3458/3976/8772/2309/7704
BP	GO:1903708	positive regulation of hemopoiesis	145	0.446164	2.27627	7.88704e-10	1.96749e-08	1.2366e-08	4612	tags=46%, list=18%, signal=37%	2353/6363/942/3398/695/864/3575/7071/558/3059/2124/10892/114548/939/8600/1230/301/3594/10288/3600/10125/677/5788/1960/920/3635/2737/64332/8651/7305/7048/3601/7189/972/2736/3565/841/3122/4920/3593/7535/1378/5925/2625/9308/6850/3965/51561/84807/3142/865/2621/7124/11006/5105/3707/3574/55012/3071/941/169200/3458/3976/8772/2309/7704
BP	GO:1903034	regulation of response to wounding	144	0.445699	2.26609	8.07356e-10	2.00763e-08	1.26182e-08	4132	tags=37%, list=16%, signal=31%	9314/1398/4780/114897/5156/7056/710/7057/7852/22915/5054/51330/5604/301/240/1906/7001/1839/90102/2247/2152/4846/6915/89790/928/64581/2149/325/58189/54361/2160/64094/10855/6558/4638/18/81565/5055/58529/7128/5627/5764/7124/5327/2316/7103/1361/5728/2811/150/71/3480/3848
CC	GO:0060205	cytoplasmic vesicle lumen	303	0.346176	1.94705	8.28823e-10	2.05448e-08	1.29127e-08	4502	tags=35%, list=18%, signal=29%	5552/83716/25801/2/710/7057/567/51316/6279/9535/1621/1893/22915/7123/1675/5054/6386/64333/5443/5199/5223/6283/240/1992/353/718/5768/7078/1191/10549/2934/1794/3671/6280/1116/2268/2219/7043/411/23621/2950/26578/23593/847/1265/116844/55276/23406/23191/55860/2517/6694/820/6678/5267/10490/4069/1667/1668/210/10855/4317/7520/4332/55664/10447/8288/1075/5713/1654/7076/2919/201294/3101/6282/4125/2621/978/5…
CC	GO:0030055	cell-substrate junction	397	0.320447	1.8513	8.32794e-10	2.05781e-08	1.29337e-08	4082	tags=28%, list=16%, signal=24%	6503/9173/51056/390/388/1969/975/3716/10672/9124/5239/567/4311/7010/8826/2022/10673/85458/1308/6386/5604/960/6189/301/11170/2274/3717/55742/6129/5329/3676/91624/824/2934/5788/23224/7052/9349/90102/10982/59341/2273/30845/5880/4739/9404/2314/847/3845/1265/22800/23022/391/6130/10096/928/23191/6160/9902/79026/8462/7431/3603/9590/91179/6207/8773/6125/6168/9358/3987/3383/3695/8321/83478/977/10544/5216/…
BP	GO:2001251	negative regulation of chromosome organization	75	-0.57898	-2.38625	8.60951e-10	2.1207e-08	1.33289e-08	2954	tags=43%, list=12%, signal=38%	55055/7515/8658/51750/6714/142/11130/55226/3192/9319/7756/55755/4085/10111/699/9232/26271/9031/9700/7272/891/81620/1063/54552/9212/10403/4171/9735/7517/7153/84861/80119
BP	GO:0000226	microtubule cytoskeleton organization	480	-0.354137	-1.81548	8.68212e-10	2.13188e-08	1.33992e-08	6420	tags=39%, list=26%, signal=30%	54828/6249/160762/10345/84071/84790/89780/51199/83544/6314/90060/9576/26005/5562/5901/6101/51143/6674/1778/8312/3796/403/117178/55329/83473/1453/10579/4287/6683/5902/23363/4292/10300/23332/10274/84084/58526/79643/1017/5563/3996/225689/84722/347688/26054/5058/7516/25/81027/100506658/4134/4133/9371/25809/6566/3834/9820/2932/80254/203068/114327/285331/163786/9024/2011/10844/84612/388389/164395/12409…
BP	GO:0050868	negative regulation of T cell activation	109	0.481114	2.34509	9.52292e-10	2.33103e-08	1.46509e-08	6090	tags=54%, list=24%, signal=41%	26191/942/3659/864/10875/80149/11314/5621/301/11326/10288/7001/339390/6441/2737/54900/4092/2615/8651/972/79679/56940/7805/3958/3565/3902/84868/80380/2213/1378/57045/3965/149041/9306/1493/27242/3142/865/57162/11006/56253/3456/868/8379/3071/941/79626/3566/634/1051/84524/10457/1511/5771/2267/384/3559/30009/383
CC	GO:0005925	focal adhesion	389	0.321166	1.85404	9.88578e-10	2.41231e-08	1.51618e-08	4082	tags=29%, list=16%, signal=24%	6503/9173/51056/390/388/1969/975/3716/10672/9124/5239/567/4311/7010/8826/2022/10673/85458/6386/5604/960/6189/301/11170/2274/3717/55742/6129/5329/3676/91624/824/2934/5788/23224/7052/9349/90102/10982/59341/2273/30845/5880/4739/9404/2314/847/3845/1265/22800/23022/391/6130/10096/928/23191/6160/9902/79026/8462/7431/3603/9590/91179/6207/8773/6125/6168/9358/3987/3383/3695/8321/83478/977/10544/5216/3055/…
MF	GO:0008094	ATP-dependent activity, acting on DNA	91	-0.555961	-2.35398	1.09037e-09	2.65244e-08	1.6671e-08	6378	tags=65%, list=25%, signal=49%	9044/3508/2068/10856/164045/9557/83990/7486/23064/5982/5928/8607/55636/7516/399687/6832/1660/6597/50485/5889/56897/1653/2547/8438/11144/51750/165545/25788/5976/4175/4436/1763/4173/1108/8458/6596/1663/4176/54821/5983/10111/84515/5985/9401/5984/4172/2956/2071/5981/4174/57680/63922/4171/10721/7517/9400/7153/641/80119
CC	GO:0000781	chromosome, telomeric region	118	-0.514308	-2.24788	1.11579e-09	2.70588e-08	1.70068e-08	3022	tags=38%, list=12%, signal=34%	56897/2547/7515/1642/9219/11200/5591/11144/8658/23468/57187/51750/286053/29935/5976/4175/328/4436/1111/5514/142/1763/4173/55226/4221/1108/24144/4176/10111/10635/9401/4172/9894/2237/4174/5424/4171/11335/79228/7517/8563/2146/641/80119/9984
BP	GO:0032642	regulation of chemokine production	86	0.527435	2.48545	1.16878e-09	2.82563e-08	1.77595e-08	5012	tags=51%, list=20%, signal=41%	9314/1958/9173/59307/1969/3569/3091/3553/1436/7099/4615/6372/4938/90865/3162/59341/2950/7098/255231/972/7097/64581/199/84868/8832/6850/3965/1654/116/245937/140885/7124/11006/3574/64127/351/3929/51284/3458/6591/64170/148022/23765/3566
BP	GO:0072593	reactive oxygen species metabolic process	202	0.392273	2.09249	1.17845e-09	2.84023e-08	1.78513e-08	5996	tags=50%, list=24%, signal=38%	2358/4780/22933/3091/7057/1544/2534/80149/653361/7099/2308/10516/5547/240/5336/65018/706/1906/1545/10549/120892/7001/55022/2643/654817/6441/1536/596/5880/2950/4846/847/7837/7305/7048/64581/185/1410/4689/6622/51167/4317/329/6648/5166/4688/84329/6850/5366/8288/6505/1543/6649/59272/3689/2185/9973/10935/4129/7124/4719/9474/3684/5446/5873/654816/51/79400/4314/3240/2773/2771/2537/6647/23530/683/22925/1…
BP	GO:0002287	alpha-beta T cell activation involved in immune response	64	0.585769	2.5732	1.19832e-09	2.86173e-08	1.79864e-08	3041	tags=50%, list=12%, signal=44%	5734/6363/3569/942/80149/10892/114548/301/3662/8809/3594/10538/602/114836/4092/4063/8320/6774/64332/64218/57089/3565/3122/3593/2625/3965/149041/51561/6095/59067/84807/3142
BP	GO:0002293	alpha-beta T cell differentiation involved in immune response	64	0.585769	2.5732	1.19832e-09	2.86173e-08	1.79864e-08	3041	tags=50%, list=12%, signal=44%	5734/6363/3569/942/80149/10892/114548/301/3662/8809/3594/10538/602/114836/4092/4063/8320/6774/64332/64218/57089/3565/3122/3593/2625/3965/149041/51561/6095/59067/84807/3142
BP	GO:0071103	DNA conformation change	90	-0.556743	-2.35489	1.19542e-09	2.86173e-08	1.79864e-08	6331	tags=61%, list=25%, signal=46%	3508/5813/2068/10856/164045/11277/9557/83990/7486/23064/5982/3148/8607/55636/25/6832/3159/1660/56897/1653/2547/51659/8438/84296/51750/165545/7156/25788/64785/5976/4175/1763/4173/1108/1663/4176/54821/5983/10111/84515/5985/9401/5984/4172/2071/4174/57680/63922/4171/8940/10721/9400/7153/641/80119
CC	GO:0030667	secretory granule membrane	281	0.359141	2.00095	1.24755e-09	2.97024e-08	1.86684e-08	4437	tags=34%, list=18%, signal=28%	2357/2358/2212/6515/1604/6402/728/4311/8826/1621/7133/11314/960/5547/2040/5329/5787/10288/719/11010/3106/6403/160364/143425/5788/1536/374403/5799/310/967/148229/3920/5870/7305/11031/5066/26002/10972/57153/2207/391/928/7097/5023/5099/2215/6678/963/5724/6622/3958/929/3107/8773/5175/965/3136/11025/1378/54918/961/84329/5663/945/6793/26154/6556/6844/684/10184/3689/79895/140885/8987/968/10159/3684/5873…
BP	GO:0034754	cellular hormone metabolic process	131	0.460011	2.31938	1.29524e-09	3.07443e-08	1.93232e-08	4008	tags=40%, list=16%, signal=34%	1958/5156/25976/1544/133/654/54658/27122/220/2099/1576/706/1910/1545/653/125/1592/126/54884/127/5959/3294/51170/64577/1562/6783/1559/54577/6716/54361/130/51144/6715/7366/9227/5947/124/7923/1889/8228/1543/54905/1558/10170/1551/6718/8608/54659/57104/54600/1565/79644/57665
BP	GO:0019216	regulation of lipid metabolic process	286	0.352963	1.96497	1.32619e-09	3.13838e-08	1.97252e-08	4355	tags=32%, list=17%, signal=27%	2358/1958/5743/6363/5156/6366/975/9611/3398/64805/133/3949/7010/3553/23417/654/54658/301/27122/1236/3357/5336/114294/718/706/824/653/83643/51141/33/4067/2268/64919/3490/345275/2247/29103/5294/7069/972/23038/185/11331/2330/8720/60481/6622/54361/113791/1389/2322/53345/5343/9104/5166/51099/376497/2672/427/6615/1066/6095/998/7376/37/5140/2185/10613/23410/6653/83752/4790/7124/5105/27120/11160/12/10580…
BP	GO:0006405	RNA export from nucleus	68	-0.59771	-2.41671	1.34397e-09	3.17087e-08	1.99294e-08	4064	tags=49%, list=16%, signal=41%	11260/1660/55677/9887/84271/4686/11052/57187/5433/29890/55746/5976/54830/23381/29072/6830/9972/65083/23511/26993/9883/7248/8480/57122/79228/79902/8021/8563/57510/9631/8106/26019/9984
BP	GO:0044784	metaphase/anaphase transition of cell cycle	61	-0.614947	-2.42733	1.37918e-09	3.24056e-08	2.03674e-08	3893	tags=51%, list=15%, signal=43%	64682/56155/55743/51434/55055/286053/11130/9319/7756/51433/55755/4085/699/51529/26271/9700/1062/7272/891/990/81620/29945/1063/9212/10403/10460/9735/7517/11065/84861/8697
BP	GO:1901990	regulation of mitotic cell cycle phase transition	259	-0.414639	-1.99615	1.38178e-09	3.24056e-08	2.03674e-08	3060	tags=33%, list=12%, signal=29%	5889/51434/23476/10197/55055/56257/55159/9344/1642/51692/55920/11200/5591/7023/1112/60561/51720/23236/134353/27085/286053/993/8317/51343/5933/1029/1019/328/51514/1111/55198/11130/994/995/65123/5515/6868/9319/7756/55835/835/9928/5310/51433/56658/55755/54443/59343/4085/6491/672/699/51529/25942/57504/26271/6241/4193/9700/1062/7272/80279/891/144455/990/2071/81620/29945/113130/1063/9212/10403/9735/575…
CC	GO:0034774	secretory granule lumen	300	0.346579	1.93691	1.39837e-09	3.26968e-08	2.05504e-08	4502	tags=35%, list=18%, signal=29%	5552/83716/25801/2/710/7057/567/51316/6279/9535/1621/1893/22915/7123/1675/5054/6386/64333/5443/5199/5223/6283/240/1992/353/718/5768/7078/1191/10549/2934/1794/3671/6280/1116/2268/2219/7043/411/2950/26578/23593/847/1265/116844/55276/23406/23191/55860/2517/6694/820/6678/5267/10490/4069/1667/1668/210/10855/4317/7520/4332/55664/10447/8288/1075/5713/1654/7076/2919/201294/3101/6282/4125/2621/978/5627/47…
CC	GO:0000922	spindle pole	130	-0.498661	-2.21206	1.40446e-09	3.27415e-08	2.05785e-08	3653	tags=41%, list=15%, signal=35%	80254/114327/10844/2010/8502/23331/27229/10928/8658/4957/84942/8243/55200/284403/3832/994/3192/5515/4751/2801/1663/10615/259266/55755/10733/4085/7840/81610/9793/8086/26586/10101/22974/29899/891/991/990/8480/150468/23005/1063/9212/10460/7283/9735/85378/199953/1639/9055/28964/808/84861/6790
BP	GO:0002292	T cell differentiation involved in immune response	71	0.5636	2.54001	1.45606e-09	3.38212e-08	2.12572e-08	3345	tags=49%, list=13%, signal=43%	5734/6363/3569/942/10875/80149/10892/114548/301/3662/8809/3594/10538/602/114836/4092/4063/8320/6774/64332/2207/64218/57089/3565/3122/3593/2625/3965/149041/51561/6095/59067/84807/3142/5105
BP	GO:0001503	ossification	369	0.32848	1.87969	1.45941e-09	3.38212e-08	2.12572e-08	5799	tags=38%, list=23%, signal=30%	3726/1959/5743/5552/5734/3572/1969/3569/3091/864/1893/7071/7123/9770/3399/654/22856/2658/92/8600/51119/1230/240/2274/1052/4091/6422/8519/202151/653/9188/9464/6320/596/2268/2296/2737/4092/7043/659/4256/2247/26578/847/30812/22800/249/10272/7189/9902/51232/25937/9451/2736/54361/4330/29887/649/3488/166929/57419/4664/4920/202018/1009/64131/1021/10413/57045/8321/3727/22904/5020/1513/3611/6615/6546/3400…
BP	GO:0000375	RNA splicing, via transesterification reactions	225	-0.428383	-2.04109	1.4662e-09	3.38782e-08	2.1293e-08	5529	tags=42%, list=22%, signal=33%	55285/29896/55147/23064/10421/4116/53938/9904/22916/83443/153527/10907/58155/9879/10521/8899/23398/1660/8087/2332/55192/84950/8896/9775/51631/25929/6633/10262/79833/10199/22827/84991/27339/6629/23524/3191/1653/9733/83759/4686/22913/7072/6627/7737/6631/27336/10419/6628/9128/6732/8570/6634/6636/29890/55280/8449/51340/11338/55596/8175/3192/10921/24144/25766/57819/6635/10992/51645/55796/22794/10946/9…
BP	GO:0051271	negative regulation of cellular component movement	259	0.365501	2.0296	1.58346e-09	3.64801e-08	2.29283e-08	4043	tags=30%, list=16%, signal=25%	9314/1398/6347/4780/5734/388/6366/1634/10672/25932/6387/7057/22998/2022/5054/3084/2658/11314/4804/127435/6422/4070/8519/11117/3162/1602/1545/653/114757/90102/596/2841/79812/4092/2247/9353/6915/6774/1265/7454/928/972/140/56940/5176/199/54361/7049/3488/3565/10653/1809/7075/9104/1027/2625/375056/94/3486/4163/684/11235/7076/65009/4681/7124/8434/8692/7414/84034/10370/5728/93649/1281/397/6237/11240
CC	GO:0031983	vesicle lumen	305	0.344833	1.93243	1.74152e-09	4.00039e-08	2.5143e-08	4502	tags=35%, list=18%, signal=29%	5552/83716/25801/2/710/7057/567/51316/6279/9535/1621/1893/22915/7123/1675/5054/6386/64333/5443/5199/5223/6283/240/1992/353/718/5768/7078/1191/10549/2934/1794/3671/6280/1116/2268/2219/7043/411/23621/2950/26578/23593/847/1265/116844/55276/23406/23191/55860/2517/6694/820/6678/5267/10490/4069/1667/1668/210/10855/4317/7520/4332/55664/10447/8288/1075/5713/1654/7076/2919/201294/3101/6282/4125/2621/978/5…
BP	GO:0002675	positive regulation of acute inflammatory response	24	0.785635	2.76582	1.95461e-09	4.47675e-08	2.81371e-08	1464	tags=54%, list=6%, signal=51%	5743/3572/3569/695/3553/3133/4889/8600/1236/718/241/5294/9180
BP	GO:0033002	muscle cell proliferation	174	0.411732	2.1591	1.99043e-09	4.54128e-08	2.85426e-08	5781	tags=45%, list=23%, signal=35%	5743/3725/9510/3569/10672/4609/3398/7057/7472/4889/7099/4615/6352/5292/3717/3162/1906/3600/23414/1839/2296/7043/60485/659/57447/2247/4846/7048/3596/5031/23493/2047/4883/199/80310/5724/7049/3488/2627/3593/1027/6648/7520/10413/3486/59272/65009/7128/30008/7124/10370/5728/6772/93649/284/2773/3480/3479/2771/4331/3458/8837/4313/4881/6909/2697/6869/4969/1535/26281/2006/5159/5950/387/7042/650/4656/7168/1…
BP	GO:1901615	organic hydroxy compound metabolic process	492	0.300295	1.76552	1.99438e-09	4.54128e-08	2.85426e-08	5392	tags=35%, list=21%, signal=28%	4061/9023/3091/1544/3949/51302/1621/319/654/81537/1571/5805/114876/27122/220/54657/27010/5336/9839/1576/27284/1910/1545/5593/3931/653/125/1592/8529/2643/128/80168/51141/33/9464/126/219/54884/127/5959/596/114879/2247/5360/847/389434/26002/1562/249/6609/3945/6783/10449/2034/5031/2712/1559/1080/6716/2330/5724/8720/6622/54361/6342/3565/130/170685/197257/25987/5341/6715/1508/10558/8867/3939/9227/5641/…
BP	GO:0032623	interleukin-2 production	58	0.600863	2.61383	2.04188e-09	4.60924e-08	2.89698e-08	3338	tags=53%, list=13%, signal=46%	7538/942/5588/5142/3553/5144/10892/5621/301/3662/11326/5336/2633/5788/6441/920/7189/64581/729230/79679/916/7805/3902/84868/84433/1378/2625/9308/940/7128/11006
BP	GO:0032663	regulation of interleukin-2 production	58	0.600863	2.61383	2.04188e-09	4.60924e-08	2.89698e-08	3338	tags=53%, list=13%, signal=46%	7538/942/5588/5142/3553/5144/10892/5621/301/3662/11326/5336/2633/5788/6441/920/7189/64581/729230/79679/916/7805/3902/84868/84433/1378/2625/9308/940/7128/11006
BP	GO:0140546	defense response to symbiont	258	0.359863	1.99614	2.03708e-09	4.60924e-08	2.89698e-08	4729	tags=38%, list=19%, signal=31%	26191/3569/3665/5359/3659/10346/3428/64135/81030/3553/10875/4939/80149/665/6039/91607/4615/10964/54941/55601/4938/51191/3594/8519/8547/10060/3600/2633/9188/5788/10379/3437/6041/596/3459/26057/197259/7098/4599/3764/84282/708/51311/91543/7097/5970/3588/661/11331/5551/1667/81622/1668/3565/10077/9447/3593/85363/4600/329/4283/3455/5366/6397/89870/51561/684/170506/59067/201294/3669/7128/8780/8638/9474/…
BP	GO:1901222	regulation of NIK/NF-kappaB signaling	87	0.518309	2.44734	2.14697e-09	4.83252e-08	3.03731e-08	3034	tags=45%, list=12%, signal=40%	6363/26191/4306/942/3553/9770/80149/114548/7099/939/8809/1540/54386/1906/602/7098/23328/8717/5494/7189/7097/5970/11331/7805/929/9111/84868/3593/4317/3987/329/3965/114900/3611/149041/51561/1654/9516/6688
BP	GO:0050856	regulation of T cell receptor signaling pathway	40	0.665379	2.66532	2.34455e-09	5.26215e-08	3.30734e-08	3928	tags=62%, list=16%, signal=53%	26191/1997/975/10666/10892/11314/5621/79037/1236/2633/84174/4068/50852/8915/5970/56940/11126/7805/3958/84433/3783/149041/11006/3932/868
BP	GO:0071241	cellular response to inorganic substance	202	0.388587	2.07283	2.36853e-09	5.28567e-08	3.32212e-08	2687	tags=27%, list=11%, signal=25%	3726/2354/1398/2353/4780/5743/3725/4499/4502/4493/25932/4494/1544/567/8826/4501/654/653361/4489/2308/5621/288/3162/5336/706/1906/241/143425/120892/1393/10235/1536/151835/5311/23621/30061/4495/358/6609/5176/9451/4496/57586/6622/1740/210/6558/284111/1027/5641/3727/84329/6505/1543/107
BP	GO:0051051	negative regulation of transport	379	0.321017	1.84276	2.3684e-09	5.28567e-08	3.32212e-08	4457	tags=32%, list=18%, signal=27%	5743/5359/4609/7057/8301/3553/2669/3084/4889/6386/7133/11314/301/5999/288/6422/415116/3162/7132/3134/10288/1906/51185/5593/10550/120892/1393/2294/3280/55022/8529/5997/57817/7779/596/1193/5311/9531/5530/3998/2042/50852/160140/4846/29969/1265/27236/9446/3753/51009/90007/91543/23191/972/7097/151/729230/11151/2149/1410/23479/6622/3958/10956/9525/4131/3593/10434/2213/961/8832/945/6814/3965/5020/83452/…
BP	GO:0006805	xenobiotic metabolic process	105	0.484678	2.34792	2.46854e-09	5.49321e-08	3.45257e-08	4390	tags=44%, list=17%, signal=36%	1544/316/10/2327/1571/6283/54658/54657/1576/27284/1545/1592/8529/10249/2950/9446/2329/1562/113612/2947/1559/54577/2330/1555/7366/1549/54575/1543/54905/6095/348158/1558/1548/2180/1429/1551/1573/9/54659/7172/5446/54600/1565/30/13/55270
BP	GO:0044703	multi-organism reproductive process	191	0.38819	2.06157	2.5282e-09	5.61003e-08	3.52599e-08	4351	tags=35%, list=17%, signal=29%	3726/2354/2353/23764/5743/7056/133/3553/639/54407/92/2099/5671/1906/824/1393/3485/5997/596/7043/5858/659/3490/5069/708/7048/5066/151/5023/5724/2013/54361/3488/8061/84868/5678/1508/1307/3965/5020/1543/5368/412/59272/116/7076/3675/2529/796/10935/5764/23641/8434/7421/1394/10370/952/51673/397/150/81539/259/1828/2056/6863/6647/3976
CC	GO:0005684	U2-type spliceosomal complex	79	-0.566227	-2.34913	2.59569e-09	5.74264e-08	3.60934e-08	3804	tags=48%, list=15%, signal=41%	84950/8896/9775/51631/6633/10262/27339/6629/23524/6627/7737/6631/27336/6628/9128/6634/6636/8449/51340/11338/151903/8175/24144/25766/57819/6635/10992/51645/22794/10946/9129/9716/55696/26121/6637/9343/25804/1659
BP	GO:2000146	negative regulation of cell motility	251	0.36816	2.02591	2.60263e-09	5.74264e-08	3.60934e-08	4043	tags=29%, list=16%, signal=25%	9314/1398/6347/4780/5734/388/6366/1634/10672/25932/6387/7057/22998/2022/5054/3084/2658/11314/4804/127435/6422/4070/8519/11117/3162/1602/1545/653/114757/90102/596/2841/79812/4092/2247/9353/6915/6774/1265/7454/972/140/56940/5176/199/54361/3488/3565/10653/1809/7075/9104/2625/375056/94/3486/4163/684/11235/7076/65009/4681/7124/8434/8692/7414/84034/10370/5728/93649/1281/397/6237/11240
BP	GO:0031098	stress-activated protein kinase signaling cascade	225	0.378628	2.06546	2.63376e-09	5.795e-08	3.64225e-08	3514	tags=34%, list=14%, signal=30%	7538/5734/6363/26191/6366/7164/9611/4609/3553/9770/85458/80149/6386/653361/4616/7099/2308/4615/939/11342/5604/8600/3489/1540/1236/6422/65018/10125/677/10550/120892/355/9464/4067/80824/59341/5048/5609/2950/7098/148170/29969/23328/6504/7189/6416/64581/56940/2047/1410/51339/11184/3476/5602/51562/5606/4920/4317/2213/4055/3965/10114/5187/11235/54910/998/2185/6688/9618/4281/389400/4790/3082/140885/7124…
BP	GO:0006816	calcium ion transport	364	0.325601	1.86742	2.69176e-09	5.90603e-08	3.71203e-08	4413	tags=30%, list=18%, signal=26%	6347/5743/6363/6366/5142/6387/353514/55858/2823/2534/7852/2669/5144/79054/5621/1230/5999/6352/1236/3357/5336/7178/10288/706/1906/1910/10268/287/3280/5788/4067/148/920/7779/59341/596/30845/1193/5311/5530/2247/4846/5294/9446/6520/255231/3596/5023/5031/774/57165/79026/10800/11151/2149/3603/489/6622/11027/3958/55584/93589/57419/2701/931/126306/3783/9104/4283/5663/8832/4638/945/9512/387129/6546/2904/2…
BP	GO:0032508	DNA duplex unwinding	79	-0.565483	-2.34604	2.91168e-09	6.37071e-08	4.00409e-08	6331	tags=65%, list=25%, signal=48%	3508/5813/2068/10856/164045/11277/9557/83990/7486/23064/5982/8607/55636/6832/3159/1660/56897/1653/2547/51659/8438/84296/51750/165545/25788/64785/5976/4175/1763/4173/1108/1663/4176/54821/5983/10111/84515/5985/9401/5984/4172/2071/4174/57680/63922/4171/10721/9400/7153/641/80119
BP	GO:0051607	defense response to virus	257	0.358319	1.9834	2.96e-09	6.45841e-08	4.05921e-08	4729	tags=37%, list=19%, signal=31%	26191/3569/3665/5359/3659/10346/3428/64135/81030/3553/10875/4939/80149/665/6039/91607/4615/10964/54941/55601/4938/51191/3594/8519/8547/10060/3600/2633/9188/5788/10379/3437/6041/596/3459/26057/197259/7098/4599/3764/84282/708/51311/91543/7097/5970/3588/661/11331/5551/1667/81622/1668/3565/10077/9447/3593/85363/4600/329/4283/3455/5366/6397/89870/51561/684/170506/59067/201294/3669/7128/8780/8638/9474/…
BP	GO:0071466	cellular response to xenobiotic stimulus	162	0.418285	2.15887	2.98074e-09	6.48559e-08	4.07629e-08	3831	tags=38%, list=15%, signal=32%	4780/969/5142/4609/1544/316/7852/3553/10/5621/2327/1571/6283/54658/54657/1576/27284/1906/1545/1393/1592/8529/10249/27063/2950/7098/4824/9446/2329/1562/113612/2947/1559/54577/2330/1555/9447/7366/6554/1549/5925/54575/1543/54905/6095/2203/348158/1558/2621/1548/2180/1429/1551/284996/1573/9/54659/7172/5446/54600/1565
BP	GO:0006631	fatty acid metabolic process	351	0.327057	1.8683	3.17505e-09	6.88924e-08	4.32999e-08	5781	tags=39%, list=23%, signal=31%	5743/9611/1544/3553/23417/5322/2687/5730/1571/2639/6916/4056/301/240/51179/55862/7132/718/1576/1906/1545/241/641371/10999/313/8529/128/51141/33/114757/127/84693/158584/2950/5740/84266/549/5066/1562/113612/972/284541/10449/23038/1559/6296/55301/1555/1666/60481/6622/5095/6342/283985/51144/160428/9373/10434/51703/9104/1549/5166/79746/1376/10728/2108/7923/54988/1962/1543/51099/54363/376497/427/38/106…
BP	GO:1902532	negative regulation of intracellular signal transduction	434	0.305064	1.77629	3.41979e-09	7.39978e-08	4.65087e-08	4788	tags=32%, list=19%, signal=27%	4170/4780/5743/26191/1969/9709/5516/10253/11213/9611/6387/4609/3091/7057/3553/5144/9770/80149/467/114548/7099/2308/91663/1827/1844/11314/5621/54941/960/245928/2274/1540/2099/6422/11117/5329/65018/7178/7078/2633/55024/1191/6425/5138/120892/1848/5788/220441/4067/374403/10010/148/5997/80824/596/54900/84174/5048/9938/2950/57447/9353/708/8661/1847/9100/5494/6609/972/5970/126374/8382/51339/3476/55584/9…
BP	GO:0002294	CD4-positive, alpha-beta T cell differentiation involved in immune response	63	0.579386	2.5317	3.52423e-09	7.60476e-08	4.7797e-08	3041	tags=49%, list=12%, signal=43%	5734/6363/3569/942/80149/10892/114548/301/3662/8809/3594/10538/602/114836/4092/4063/6774/64332/64218/57089/3565/3122/3593/2625/3965/149041/51561/6095/59067/84807/3142
BP	GO:0032392	DNA geometric change	83	-0.558798	-2.33371	3.69297e-09	7.94699e-08	4.9948e-08	6331	tags=63%, list=25%, signal=47%	3508/5813/2068/10856/164045/11277/9557/83990/7486/23064/5982/3148/8607/55636/6832/3159/1660/56897/1653/2547/51659/8438/84296/51750/165545/25788/64785/5976/4175/1763/4173/1108/1663/4176/54821/5983/10111/84515/5985/9401/5984/4172/2071/4174/57680/63922/4171/10721/9400/7153/641/80119
BP	GO:0071675	regulation of mononuclear cell migration	104	0.491192	2.38108	3.704e-09	7.94889e-08	4.996e-08	3323	tags=39%, list=13%, signal=34%	1398/6347/2358/6366/6387/728/7057/1893/5054/1436/81704/1230/6352/1236/3676/719/653/4067/59341/9353/6504/708/729230/199/80310/3958/3565/5641/961/375056/1240/3965/6793/2185/6688/245937/2621/4681/58494/6348/7124
BP	GO:0051304	chromosome separation	86	-0.548263	-2.29952	3.77194e-09	8.07258e-08	5.07374e-08	3893	tags=45%, list=15%, signal=38%	64682/56155/55743/51434/55055/5518/146956/286053/7156/11130/9319/7756/51433/55755/4085/699/51529/9232/26271/9700/1062/7272/891/990/81620/29945/1063/9212/10403/10460/9735/29781/7517/80010/9400/11065/7153/84861/8697
MF	GO:0042393	histone binding	206	-0.431112	-2.02675	3.92671e-09	8.38091e-08	5.26753e-08	5499	tags=42%, list=22%, signal=33%	359787/7158/1616/1163/56254/9025/64061/10847/3720/222229/5928/23198/6046/55636/11137/55023/83743/26147/2332/6597/6599/138474/114825/10927/55705/5757/4298/23476/80764/26009/9733/84733/8535/10389/6944/4676/23310/29128/1164/29028/8658/23468/51720/80012/23234/51460/10360/1104/9960/8028/6601/6749/6830/6907/9918/1108/169981/6872/29057/8208/84295/54892/9031/23170/4678/139886/54799/8805/22955/2956/90780/…
BP	GO:0002711	positive regulation of T cell mediated immunity	57	0.59855	2.58295	3.94385e-09	8.39462e-08	5.27615e-08	2908	tags=49%, list=12%, signal=44%	1604/975/3569/567/912/3553/3133/8417/10892/114548/8809/3594/3134/3554/3106/3125/5788/6504/91543/7189/3565/3122/3136/3593/2625/51561/911/913
BP	GO:0007162	negative regulation of cell adhesion	258	0.356053	1.97501	4.40411e-09	9.34889e-08	5.87592e-08	6274	tags=45%, list=25%, signal=34%	9314/114897/26191/6366/942/6387/3659/7057/864/10875/80149/5054/654/91663/11314/5621/301/11170/3717/11326/4070/10288/1545/2633/7001/5788/339390/6441/90102/59341/2737/54900/4092/2615/9404/8651/53827/928/972/79679/56940/3557/7805/3958/3565/3902/84868/80709/10653/80380/2213/1378/57045/375056/94/3965/26154/149041/9306/18/1493/1600/5140/27242/6688/3142/865/57556/57162/11006/10507/56253/5728/6494/284/34…
BP	GO:0030099	myeloid cell differentiation	335	0.328765	1.87992	4.43576e-09	9.39063e-08	5.90215e-08	4751	tags=35%, list=19%, signal=29%	7538/3726/2353/3725/6363/1969/975/3665/4609/3398/3428/3091/567/10365/7071/9770/3059/1436/2124/7099/92/8600/55509/1230/3662/6194/3717/25979/1236/6422/51266/3600/2113/677/79705/714/10538/4067/920/3635/5048/211/7098/4495/1777/6774/10100/7305/7048/10320/54790/10272/7189/972/7097/2034/9935/325/29887/7049/3565/159296/7107/841/4920/3593/11025/139716/1021/5925/4055/3394/2625/5663/22904/116071/64806/51561…
BP	GO:0051403	stress-activated MAPK cascade	220	0.371541	2.00648	4.4595e-09	9.41544e-08	5.91775e-08	3514	tags=34%, list=14%, signal=29%	7538/5734/6363/26191/6366/7164/9611/4609/3553/9770/85458/80149/6386/653361/4616/7099/2308/4615/939/5604/8600/3489/1540/1236/6422/65018/10125/677/10550/120892/355/9464/80824/59341/5048/5609/2950/7098/148170/29969/23328/6504/7189/6416/64581/56940/2047/1410/51339/11184/3476/5602/51562/5606/4920/4317/2213/4055/3965/10114/5187/11235/54910/998/2185/6688/9618/4281/4790/3082/140885/7124/9459/9821
BP	GO:0040013	negative regulation of locomotion	285	0.349591	1.9511	5.06238e-09	1.06596e-07	6.69971e-08	4723	tags=32%, list=19%, signal=26%	9314/1398/6347/4780/5734/388/6366/1634/10672/25932/6387/7057/22998/2022/5054/3084/2658/11314/4804/127435/6422/4070/8519/11117/3162/1602/1545/653/114757/90102/596/2841/79812/4092/2247/9353/6915/6774/1265/7454/972/140/56940/5176/57561/199/54361/64218/3488/3565/10653/1809/7075/9104/2625/375056/94/3486/4163/684/11235/7076/54910/65009/2915/57556/223117/4681/7124/8434/10507/8692/7414/84034/10370/5728/9…
CC	GO:0045335	phagocytic vesicle	130	0.452481	2.27623	5.10475e-09	1.072e-07	6.73766e-08	5511	tags=50%, list=22%, signal=39%	55647/567/5322/3133/9482/653361/51762/219972/3134/3106/1520/2934/1536/5880/3920/83547/7096/6504/7454/11031/10435/306/9367/7097/11151/7431/4689/3107/81622/23673/8773/3136/5289/311/4688/84329/6814/6850/9341/7405/6556/998/338382/5868/9474/26056/9230/80223/23208/64127/122618/6845/4641/71/51284/1182/10981/3633/10333/1535/3105/3685/54106/8678/4353
BP	GO:0050864	regulation of B cell activation	114	0.467665	2.30456	5.17837e-09	1.08455e-07	6.81655e-08	3843	tags=41%, list=15%, signal=35%	64092/975/3569/3398/695/678/3543/10673/7099/939/11314/6422/55024/677/5788/4067/374403/596/3635/23495/7305/640/3596/972/8741/7805/3565/84433/2213/1378/22806/4332/23529/6850/149041/940/1493/115352/59067/27242/7128/57162/472/3574/952/64127/55012
BP	GO:1902099	regulation of metaphase/anaphase transition of cell cycle	59	-0.609333	-2.38222	5.23491e-09	1.09347e-07	6.87261e-08	2019	tags=49%, list=8%, signal=45%	56155/55743/51434/55055/286053/11130/9319/7756/51433/55755/4085/699/51529/26271/9700/1062/7272/891/990/81620/29945/1063/9212/10403/9735/7517/11065/84861/8697
BP	GO:0002548	monocyte chemotaxis	65	0.567987	2.49559	5.28153e-09	1.09735e-07	6.89703e-08	5612	tags=58%, list=22%, signal=46%	6347/2358/6363/6366/3569/6387/5054/8600/1230/6283/301/6352/6368/388372/4067/9353/414062/729230/199/3958/6349/5641/6359/6369/796/245937/4681/6348/6362/6367/503618/6361/6360/3627/57402/26585/1511/6355
BP	GO:0090068	positive regulation of cell cycle process	204	-0.429335	-2.01512	5.27472e-09	1.09735e-07	6.89703e-08	3599	tags=36%, list=14%, signal=31%	7027/8450/80174/163786/131870/6840/8502/5889/51434/23476/10869/56257/2253/51692/55920/11200/11105/23236/134353/27085/286053/993/8317/3209/1019/328/51514/55968/5514/994/252983/995/3192/6868/55835/1663/9928/51433/10615/10733/4085/6491/10635/51529/81610/25942/57504/26271/6241/4193/9700/29127/29899/891/144455/2237/990/81620/9493/29945/113130/9212/10403/1894/51203/6240/7517/1981/8563/11065/2146/8697/6…
BP	GO:0007259	receptor signaling pathway via JAK-STAT	157	0.416088	2.13984	5.32032e-09	1.10249e-07	6.9293e-08	4355	tags=37%, list=17%, signal=31%	9021/6347/3572/132299/3569/3716/8835/3575/2534/3059/1436/11314/3587/6352/3717/7132/3600/1545/3280/5788/602/4067/57817/6775/5311/6774/8651/116379/3596/729230/3588/2149/9111/3565/3593/2322/23529/3455/51561/51379/9306/59067/1600/3263/2185/7124/5789/6772/3456/84444/388646/3479/5008/2056/2690/3458/3976/857
BP	GO:1901989	positive regulation of cell cycle phase transition	100	-0.523684	-2.24455	5.7798e-09	1.19454e-07	7.50788e-08	3599	tags=48%, list=14%, signal=41%	7027/8450/80174/163786/5889/51434/23476/56257/51692/55920/11200/23236/134353/27085/286053/993/8317/1019/328/51514/5514/994/252983/995/6868/55835/51433/6491/51529/81610/25942/57504/26271/6241/4193/9700/891/990/81620/29945/113130/6240/1981/8563/11065/2146/8697/9984
BP	GO:0048771	tissue remodeling	152	0.418465	2.15969	5.89403e-09	1.21495e-07	7.63612e-08	4474	tags=39%, list=18%, signal=32%	4982/1969/3569/3091/1471/1621/558/9770/1436/84870/8600/6422/3600/79705/9464/57817/3635/2296/7043/659/5530/4846/1999/7189/729230/2034/6694/2149/29887/3488/7107/3593/7075/5166/94/6850/1513/51561/7076/5741/59067/796/2185/7128/338773/5764/9474/2316/154/7421/3574/952/9607/10512/169200/3976/857/6093/4313
CC	GO:0034708	methyltransferase complex	73	-0.575139	-2.34855	5.92735e-09	1.21861e-07	7.65913e-08	2467	tags=41%, list=10%, signal=37%	10419/6628/23468/81887/23269/6634/6636/29890/8731/79084/29104/4221/6635/6872/3054/10785/26121/10445/6637/57680/56339/30827/6874/23054/2146/11091/54554/22976/23512/9739
MF	GO:0003678	DNA helicase activity	63	-0.586546	-2.33673	5.95286e-09	1.22065e-07	7.67196e-08	6331	tags=68%, list=25%, signal=51%	3508/2068/10856/164045/9557/83990/7486/23064/5982/8607/55636/6832/1660/56897/2547/8438/51750/165545/25788/5976/4175/1763/4173/1108/1663/4176/54821/5983/10111/84515/5985/9401/5984/4172/2071/4174/57680/63922/4171/10721/9400/641/80119
BP	GO:0050728	negative regulation of inflammatory response	133	0.446513	2.25006	6.86796e-09	1.40462e-07	8.82822e-08	4340	tags=38%, list=17%, signal=32%	7538/9021/9314/2358/284207/5734/64838/3949/7010/2534/4889/7133/8530/114548/240/7132/313/2294/5788/4067/57817/2268/6288/2950/89790/5740/116379/3596/5176/325/58189/3565/3593/2213/5925/2625/6850/3055/6095/7128/4790/3082/140885/23208/64127/4907/3479/3848/7525/6647/79651
BP	GO:0046635	positive regulation of alpha-beta T cell activation	66	0.567512	2.50447	7.03484e-09	1.435e-07	9.01918e-08	3417	tags=55%, list=14%, signal=47%	6363/26191/1604/975/942/5588/864/3133/10892/114548/301/3717/3594/10148/3125/5788/2737/64332/8651/7048/729230/11126/916/3122/3593/7535/9308/6850/3965/51561/940/84807/3142/865/11006/3707
BP	GO:0038061	NIK/NF-kappaB signaling	113	0.462861	2.28261	7.21345e-09	1.46761e-07	9.22415e-08	5542	tags=53%, list=22%, signal=42%	6363/26191/4306/942/3553/9770/80149/5966/10892/114548/7099/939/8809/1540/54386/1906/602/1116/7098/23328/8717/5494/7189/7097/5970/11331/7805/929/9111/84868/3593/4317/3987/329/3965/114900/3611/149041/51561/1654/9516/6688/9618/7124/23405/8797/64127/351/51284/11035/10920/91662/10333/7105/4142/10913/54106/64922/26585/387
BP	GO:0030336	negative regulation of cell migration	239	0.359316	1.97618	7.25042e-09	1.47131e-07	9.2474e-08	4043	tags=29%, list=16%, signal=24%	9314/6347/4780/5734/388/6366/1634/10672/25932/6387/7057/22998/2022/5054/3084/2658/11314/4804/127435/6422/4070/8519/11117/3162/1602/1545/653/114757/90102/596/2841/79812/4092/2247/9353/6915/6774/1265/972/140/56940/5176/199/54361/3488/3565/1809/7075/375056/94/3486/4163/684/11235/7076/65009/4681/7124/8434/8692/7414/84034/10370/5728/93649/1281/397/6237/11240
BP	GO:0042445	hormone metabolic process	218	0.375296	2.0232	7.40983e-09	1.49977e-07	9.4263e-08	5564	tags=41%, list=22%, signal=32%	1958/5156/25976/3091/1544/133/654/54658/27122/220/2099/9060/1576/706/27284/1910/1545/653/125/1592/126/54884/127/5959/3294/590/51170/64577/389434/1562/6783/1559/54577/6716/54361/130/51144/2028/6715/1508/7366/9227/5947/124/2625/7923/1889/8228/6567/1513/1543/2672/54905/59272/223/25825/2230/3416/1558/4790/10170/1551/6718/8608/10159/54659/57104/54600/1565/79644/57665/3480/51635/2690/81555/7367/84976/1…
BP	GO:0042093	T-helper cell differentiation	61	0.582638	2.54898	7.67123e-09	1.54868e-07	9.73367e-08	3041	tags=49%, list=12%, signal=43%	5734/6363/3569/942/80149/10892/114548/301/3662/8809/3594/10538/602/114836/4092/4063/6774/64332/64218/57089/3565/3122/3593/2625/149041/51561/6095/59067/84807/3142
BP	GO:0045787	positive regulation of cell cycle	279	-0.397235	-1.93382	8.08073e-09	1.62715e-07	1.02269e-07	4568	tags=38%, list=18%, signal=31%	245711/225689/84722/79733/1761/151195/25/55023/6532/219771/9371/5155/3169/7027/8450/80174/163786/131870/3586/8812/4212/904/6840/8502/5889/51434/23476/10869/56257/2253/51692/55920/11200/1164/1845/11105/221477/23236/134353/27085/286053/993/8317/22954/6714/3209/1019/328/51514/1111/150465/55968/5514/26471/994/252983/5914/995/3192/6868/6198/55835/1663/9928/5310/51433/10615/10733/4085/6491/3054/10635/5…
BP	GO:0071826	ribonucleoprotein complex subunit organization	135	-0.472926	-2.11631	8.10392e-09	1.62764e-07	1.023e-07	4943	tags=44%, list=20%, signal=36%	10907/58155/3831/1968/54475/8607/545/6128/7458/1660/55192/55164/51631/25929/6633/79833/22827/27339/1653/6169/3326/9733/84231/4686/64963/6631/5591/11052/10419/6628/29777/23195/6732/5433/22907/140801/6634/51154/54505/6636/51340/7415/8175/24144/57819/6635/10946/9129/8894/26576/3692/26121/6637/8562/8161/25804/26284/1659/10713/9416
BP	GO:0050818	regulation of coagulation	65	0.563579	2.47622	8.26816e-09	1.65638e-07	1.04106e-07	6262	tags=58%, list=25%, signal=44%	4780/114897/5156/7056/710/7057/5054/1906/7001/2152/4846/6915/928/2149/2160/10855/5663/10544/18/5055/5627/5327/7103/1361/308/2811/3848/857/10019/634/2191/2243/350/2244/5270/5340/3818/6484
BP	GO:0007088	regulation of mitotic nuclear division	102	-0.516821	-2.22856	8.46876e-09	1.69224e-07	1.0636e-07	4409	tags=44%, list=18%, signal=37%	1761/55023/5155/56155/9820/57026/51434/55055/652/2253/10419/9088/27085/286053/3209/1104/1111/11130/995/4751/157313/9319/7756/51433/55755/4085/699/51529/26271/9700/7272/891/81620/29945/1063/9212/10403/51203/9735/7517/4288/286151/84861/8697/6790
BP	GO:0051983	regulation of chromosome segregation	81	-0.546697	-2.2756	9.46696e-09	1.88689e-07	1.18594e-07	3893	tags=46%, list=15%, signal=39%	64682/56155/55743/51434/55055/55920/286053/11130/3192/157313/9319/7756/51433/11004/55755/4085/699/51529/9232/26271/9700/1062/7272/891/990/81620/29945/1063/9212/10403/10460/9735/7517/4288/11065/84861/8697
BP	GO:0032677	regulation of interleukin-8 production	74	0.536407	2.44338	1.13459e-08	2.25564e-07	1.41771e-07	4366	tags=53%, list=17%, signal=44%	9314/26191/3569/3553/5054/2658/7099/4615/301/5788/602/1116/2219/914/7098/2152/8915/7096/6774/307/51311/972/7097/64581/5970/2149/11027/929/965/945/6850/3965/7124/8692/64127/84632/3929/51284/8772
BP	GO:0045580	regulation of T cell differentiation	140	0.432351	2.20376	1.16688e-08	2.31396e-07	1.45436e-07	4330	tags=43%, list=17%, signal=36%	6363/942/3659/864/3575/10875/80149/639/10892/114548/939/301/3662/3594/10288/3600/10125/7001/5788/1960/2737/4092/914/64332/8651/7048/972/729230/2736/3565/3902/3122/84433/3593/3111/5678/7535/1378/2625/9308/6850/3965/149041/51561/940/1493/84807/3142/865/11006/5105/3707/56253/3574/3456/257101/3071/941/6647/3458
BP	GO:0097696	receptor signaling pathway via STAT	164	0.403477	2.08085	1.20613e-08	2.38576e-07	1.49949e-07	4355	tags=36%, list=17%, signal=30%	9021/6347/3572/132299/3569/3716/8835/3575/2534/3059/1436/11314/3587/6352/3717/7132/3600/1545/3280/5788/602/4067/57817/6775/5311/6774/8651/116379/3596/729230/3588/2149/9111/3565/3593/2322/23529/3455/51561/51379/9306/59067/1600/3263/2185/387837/7124/5789/6772/3456/84444/388646/3479/5008/2056/2690/3458/3976/857
MF	GO:0020037	heme binding	124	0.44301	2.21231	1.26875e-08	2.50331e-07	1.57337e-07	5083	tags=44%, list=20%, signal=35%	5743/50865/1544/6392/51302/79689/1571/6916/3717/3162/124936/1576/1545/6999/1592/8529/114757/1536/4846/23593/847/7837/5740/1562/113612/284541/1559/1555/51167/1549/8288/1543/54905/1593/1580/1558/1548/1551/5742/1573/1582/55640/79400/3163/1565/259/10424/64816/3040/1577/29785/1528/1535/1591
CC	GO:0030666	endocytic vesicle membrane	188	0.383275	2.03352	1.28182e-08	2.52274e-07	1.58558e-07	3660	tags=35%, list=15%, signal=30%	55647/9332/567/3949/3575/3133/51762/8685/3134/3106/143425/3125/915/1839/7039/1536/4067/920/5880/3920/83547/7096/3117/4846/7314/11031/4481/306/928/972/9367/7097/55576/3113/11151/1080/917/54361/57089/3107/3119/8773/3115/3122/3136/4920/115677/5289/84329/3126/9341/6556/6844/59272/338382/6456/2890/5868/6233/1441/23166/9474/9230/154/80223/10618
BP	GO:0032722	positive regulation of chemokine production	67	0.553582	2.46045	1.30137e-08	2.55479e-07	1.60573e-07	5012	tags=54%, list=20%, signal=43%	1958/9173/3569/3091/3553/1436/7099/4615/4938/90865/3162/59341/7098/255231/972/7097/64581/199/84868/8832/6850/3965/1654/116/245937/7124/3574/64127/351/3929/51284/3458/64170/148022/23765/3566
BP	GO:0048002	antigen processing and presentation of peptide antigen	57	0.584071	2.52047	1.4128e-08	2.76663e-07	1.73887e-07	5816	tags=60%, list=23%, signal=46%	567/3133/3134/3106/1520/3125/10332/3117/2207/7189/972/3113/3107/3119/3115/3122/3136/50856/3111/2213/5641/3126/6556/3416/3109/8722/3112/3140/3551/51128/3105/30835/1510/563
BP	GO:0050921	positive regulation of chemotaxis	130	0.445765	2.24244	1.46554e-08	2.86273e-07	1.79927e-07	3295	tags=34%, list=13%, signal=30%	2358/6363/6366/3569/6387/728/7057/64805/63940/7852/4908/5054/1436/1230/6352/1236/719/1906/59341/5880/659/2247/2152/9353/6504/708/972/729230/199/80310/3603/3565/64094/5641/1240/3965/51561/1233/2185/6688/245937/2621/5764/6348
BP	GO:0034470	ncRNA processing	311	-0.382454	-1.88523	1.48601e-08	2.8955e-07	1.81986e-07	5081	tags=40%, list=20%, signal=32%	9698/23369/56931/55140/92105/103/79050/11103/7247/11062/10940/2091/80745/9836/23481/55621/11224/10521/80789/55636/55511/27043/11137/90121/10799/389421/10438/144233/6201/317781/84128/6227/57508/6155/55164/4613/8737/9277/9775/25926/25983/25896/4088/131870/117246/10199/55798/285855/54901/1736/10885/79954/1653/652/85495/23560/79039/64963/7737/5591/55661/29777/51547/54555/126789/285605/9136/23195/2730…
BP	GO:0033627	cell adhesion mediated by integrin	80	0.519894	2.39111	1.54165e-08	2.99646e-07	1.88332e-07	4604	tags=46%, list=18%, signal=38%	1398/6366/1969/64805/22915/5054/6352/3676/3680/1545/8631/4067/80173/9404/5294/916/9358/3383/3695/1307/6850/8754/3675/3681/3694/5140/3689/255743/3684/83706/3071/23075/83700/2200/3976/6591/3682
BP	GO:0042100	B cell proliferation	94	0.491157	2.31486	1.57219e-08	3.04826e-07	1.91588e-07	4072	tags=39%, list=16%, signal=33%	975/695/3575/10673/7099/11314/973/10125/5788/4067/596/3635/23495/7305/640/3596/972/3565/931/959/84433/2213/22806/4332/23529/149041/1493/115352/59067/27242/57162/472/4064/3574/952/3456/3071
BP	GO:0001667	ameboidal-type cell migration	385	0.308929	1.78704	1.60029e-08	3.09508e-07	1.94531e-07	5723	tags=36%, list=23%, signal=29%	9314/3037/4780/5743/3725/388/3397/1634/1969/9124/3091/7057/64805/7010/8826/80149/2658/3164/57142/5547/301/3357/4070/84913/3162/3676/5336/9839/1906/1910/1545/2113/1839/9464/114757/1960/54453/10982/79812/8742/411/5048/659/2247/9353/4846/9404/5294/6915/23328/708/5872/11167/30812/7048/306/27286/5176/6678/2013/8828/64218/9590/3565/57111/5606/64094/3695/5641/2625/375056/94/84159/5216/3611/168667/8754/4…
BP	GO:0008015	blood circulation	465	0.293329	1.71685	1.61631e-08	3.11836e-07	1.95993e-07	5078	tags=32%, list=20%, signal=26%	5743/5142/710/10672/6387/3398/133/10365/7010/7852/1621/5144/80149/654/5443/6916/5547/5999/3717/3357/3162/3781/10060/719/1906/1910/27345/5138/287/2934/1839/8529/2643/128/148/6324/5997/59341/30845/2296/1193/4092/659/340481/147/9353/4846/3764/5294/6915/9446/3753/3778/5910/3212/151/5023/2034/140/23493/185/10800/4883/6296/2149/5724/2013/489/9590/7068/2627/5606/2028/80852/354/6648/94/1889/5020/6505/973…
BP	GO:0002228	natural killer cell mediated immunity	68	0.548315	2.44577	1.74356e-08	3.3556e-07	2.10905e-07	5128	tags=56%, list=20%, signal=45%	1398/10666/3133/5272/3134/3106/10125/10225/3002/114836/4068/3821/11151/11126/57823/3824/3823/3902/84868/3593/3965/3805/59067/201294/387837/79465/56253/4818/5873/409/6845/100507436/8302/3822/55207/117157/634/3105
BP	GO:0046641	positive regulation of alpha-beta T cell proliferation	22	0.778846	2.6743	1.97431e-08	3.79039e-07	2.38232e-07	2801	tags=73%, list=11%, signal=65%	26191/1604/975/3133/3717/10148/5788/7048/729230/916/3593/7535/6850/3965/51561/940
MF	GO:0008201	heparin binding	147	0.419446	2.14343	1.98908e-08	3.80941e-07	2.39427e-07	5726	tags=44%, list=23%, signal=34%	9510/83716/6402/7057/7123/84870/6372/6422/6368/56925/6403/59352/1839/5788/1842/5048/6288/2247/9353/11167/8828/7049/2160/5549/51144/64094/6359/5553/5118/6649/4753/6146/30008/5764/64388/7058/4018/3075/151887/1289/3990/351/1305/2200/4043/284654/51156/3627/3918/5196/10457/149998/5046/91522/6373/14/350/50939/4353/1511/6586/2246/6355/2249/4057
BP	GO:0044706	multi-multicellular organism process	198	0.376209	1.99622	2.0165e-08	3.85249e-07	2.42135e-07	4351	tags=35%, list=17%, signal=29%	3726/2354/2353/23764/5743/7056/133/3553/639/54407/92/2099/5671/1906/824/1393/3485/5997/596/7043/5858/659/3490/5069/708/7048/5066/151/5023/5724/2013/54361/3488/8061/84868/5678/1508/1307/3965/5020/1543/5368/412/59272/116/7076/3675/2529/796/10935/5764/23641/27120/8434/7421/1394/10370/952/64518/51673/397/150/81539/259/1828/2056/6863/6647/3976
MF	GO:0023023	MHC protein complex binding	34	0.680431	2.61699	2.07789e-08	3.96013e-07	2.489e-07	2507	tags=56%, list=10%, signal=50%	975/567/925/10288/3125/920/3117/3821/972/3113/11126/3824/3119/931/3115/3122/3111/311/3126
BP	GO:0050920	regulation of chemotaxis	198	0.37562	1.9931	2.14982e-08	4.08726e-07	2.5689e-07	4969	tags=36%, list=20%, signal=29%	6347/2358/6363/5156/6366/3569/6387/728/7057/64805/63940/7852/4908/5054/1436/1230/6352/1236/719/1906/4067/59341/5880/2841/659/2247/2152/9353/4858/6504/708/972/729230/199/80310/23077/3603/64218/3565/64094/5641/1240/3965/4354/51561/54910/1233/2185/6688/57556/223117/245937/2621/4681/5764/6348/10507/64127/11240/3071/23075/83700/3929/10512/683/56920/7424/6480/7130/79148/3627/57402
BP	GO:0002715	regulation of natural killer cell mediated immunity	46	0.618921	2.55967	2.18654e-08	4.137e-07	2.60017e-07	5128	tags=63%, list=20%, signal=50%	1398/10666/3133/5272/3134/3106/10125/10225/114836/4068/3821/11126/3824/3823/3902/84868/3593/3965/3805/59067/387837/56253/409/100507436/8302/3822/117157/634/3105
BP	GO:0002720	positive regulation of cytokine production involved in immune response	63	0.56183	2.45499	2.18312e-08	4.137e-07	2.60017e-07	2844	tags=43%, list=11%, signal=38%	1604/975/3569/10666/567/3553/3133/10892/114548/7099/8809/5336/3134/3554/9188/8915/6504/91543/7189/972/64581/11126/7805/3565/2625/3805/170506
BP	GO:0002224	toll-like receptor signaling pathway	110	0.464819	2.27404	2.20448e-08	4.16089e-07	2.61518e-07	5736	tags=52%, list=23%, signal=40%	26191/3665/11213/3659/695/7099/4615/57142/11314/3662/4938/2099/5336/1520/118788/23547/4067/7098/8915/7096/23643/51311/91543/7189/7097/11027/929/81622/9111/84868/329/81793/2672/1654/115352/338382/7128/7124/57162/409/64127/23180/3929/51284/857/54726/148022/10333/57402/1535/56927/54106/9867/64922/55366/4057/7100
CC	GO:0098802	plasma membrane signaling receptor complex	172	0.397443	2.0741	2.23404e-08	4.20655e-07	2.64388e-07	3894	tags=31%, list=15%, signal=27%	3572/3569/567/925/6386/8807/92/8809/3717/3594/973/11117/3676/3680/10268/915/269/8631/4067/920/50852/7096/7048/919/9180/7189/7097/3560/3588/917/916/55584/2059/10077/9358/5678/329/7535/3695/94/6850/3675/3681/2904/3694/3689/2185/9618/2890/974/3684/1142/2811/90
BP	GO:0051090	regulation of DNA-binding transcription factor activity	393	0.302423	1.74315	2.48784e-08	4.6732e-07	2.93717e-07	3423	tags=26%, list=14%, signal=23%	9314/59307/3397/3569/5516/11213/5588/10346/3398/695/6279/3553/80149/7472/3399/3059/10892/114548/7099/4615/9908/8807/5621/8600/6283/8809/1540/5292/3717/54386/2099/3162/5583/5336/65018/1906/1545/3556/1191/6425/7001/3280/602/9464/170622/6280/5311/2737/4092/60485/5530/7098/8320/4824/8915/847/6774/307/8717/5740/306/7189/7097/64581/5970/140/5649/4692/11331/8061/5602/26508/84868/959/9447/84433/85363/592…
BP	GO:0044282	small molecule catabolic process	343	0.315045	1.79329	2.59609e-08	4.86488e-07	3.05765e-07	6261	tags=40%, list=25%, signal=30%	51302/23417/51166/2639/55862/1576/27284/8942/10999/6999/2098/1592/8529/128/33/219/127/84693/64577/2530/4846/64064/549/6783/10449/151531/2712/1806/1666/57089/3155/51380/5095/60496/6342/594/6898/10157/1738/160428/197257/2653/8867/1376/217/8604/2108/3242/1962/1543/6652/54363/54905/1593/38/8564/8310/8821/593/2110/18/2529/3101/37/3712/4329/132789/978/83752/6470/3098/51268/64087/5105/64080/2954/6718/80…
BP	GO:0051384	response to glucocorticoid	135	0.416698	2.10598	2.82141e-08	5.27448e-07	3.31509e-07	4639	tags=41%, list=18%, signal=33%	7538/2354/2353/5743/3569/2/133/678/654/54658/301/11170/3717/1906/1545/3931/677/595/3485/596/590/3490/5069/9353/5066/306/358/249/5176/199/5724/3557/594/8061/6898/210/2322/6715/10888/5020/8754/687/4129/7124/5105/5327/90/2908/3480/2720/2056/2690/8837/2309/54206
BP	GO:0002673	regulation of acute inflammatory response	43	0.634527	2.59819	2.85471e-08	5.3091e-07	3.33685e-07	3323	tags=51%, list=13%, signal=44%	5743/3572/3569/695/3553/3133/4889/114548/8600/1236/718/1910/241/1776/2950/5294/9180/325/3565/2213/2529/7124
BP	GO:0001771	immunological synapse formation	14	0.860928	2.51736	2.86026e-08	5.3091e-07	3.33685e-07	2048	tags=79%, list=8%, signal=72%	6363/6366/975/81704/1236/1794/923/2047/5551/3958/84868
BP	GO:0033047	regulation of mitotic sister chromatid segregation	43	-0.645965	-2.36069	2.85405e-08	5.3091e-07	3.33685e-07	1553	tags=42%, list=6%, signal=39%	11130/3192/9319/7756/55755/4085/699/9232/26271/7272/891/81620/1063/9212/10403/9735/7517/84861
BP	GO:0033046	negative regulation of sister chromatid segregation	40	-0.653026	-2.3471	2.97713e-08	5.48703e-07	3.44868e-07	1553	tags=42%, list=6%, signal=40%	11130/9319/7756/55755/4085/699/9232/26271/7272/891/81620/1063/9212/10403/9735/7517/84861
BP	GO:0033048	negative regulation of mitotic sister chromatid segregation	40	-0.653026	-2.3471	2.97713e-08	5.48703e-07	3.44868e-07	1553	tags=42%, list=6%, signal=40%	11130/9319/7756/55755/4085/699/9232/26271/7272/891/81620/1063/9212/10403/9735/7517/84861
BP	GO:2000816	negative regulation of mitotic sister chromatid separation	40	-0.653026	-2.3471	2.97713e-08	5.48703e-07	3.44868e-07	1553	tags=42%, list=6%, signal=40%	11130/9319/7756/55755/4085/699/9232/26271/7272/891/81620/1063/9212/10403/9735/7517/84861
BP	GO:0002886	regulation of myeloid leukocyte mediated immunity	56	0.583451	2.50168	2.99775e-08	5.51206e-07	3.46441e-07	3034	tags=52%, list=12%, signal=46%	695/3133/11314/6372/3162/718/9188/2294/4067/1776/2268/5880/7305/640/3596/729230/5724/8723/3565/84106/2213/8832/6850/3965/3598/170506/201294/3689/6688
MF	GO:0042379	chemokine receptor binding	61	0.566729	2.47938	3.09887e-08	5.68465e-07	3.57289e-07	6002	tags=54%, list=24%, signal=41%	6347/6363/6366/3716/6387/9547/6372/6352/6368/2920/388372/414062/729230/6349/6359/4283/6369/2919/6348/6772/6362/6367/2921/6361/6360/3627/57402/5196/7032/6373/6355/10344/1672
BP	GO:0051897	positive regulation of protein kinase B signaling	103	0.459929	2.22656	3.12649e-08	5.72191e-07	3.59631e-07	4142	tags=38%, list=16%, signal=32%	6363/114897/6366/10253/7057/64805/7010/2022/558/3084/3059/57142/8600/1236/65018/85453/10268/1839/1116/2247/2152/5294/708/23533/3488/10855/2625/56917/940/2621/389400/6348/7124/92140/5293/409/284/3480/5008
BP	GO:0032637	interleukin-8 production	75	0.53081	2.40661	3.23227e-08	5.90143e-07	3.70914e-07	4366	tags=52%, list=17%, signal=43%	9314/26191/3569/3553/5054/2658/7099/4615/301/5788/602/1116/2219/914/7098/2152/8915/7096/6774/307/51311/972/7097/64581/5970/2149/11027/929/965/945/6850/3965/7124/8692/64127/84632/3929/51284/8772
BP	GO:0051168	nuclear export	128	-0.472975	-2.09763	3.23965e-08	5.90143e-07	3.70914e-07	4064	tags=40%, list=16%, signal=34%	11260/1660/55677/2932/64328/9887/56478/3313/2010/84271/4686/11052/51547/57187/5433/55341/2810/8536/29890/55746/5905/5976/54830/23381/29072/6830/1020/9972/5310/65083/55696/23214/23511/580/3692/26993/9883/7248/8480/57122/79228/79902/1434/8021/8563/57510/9631/8106/26019/7514/9984
MF	GO:0046906	tetrapyrrole binding	132	0.43966	2.21598	3.27218e-08	5.94687e-07	3.7377e-07	5083	tags=43%, list=20%, signal=35%	5743/50865/1544/6392/51302/55788/79689/1571/6916/3717/3162/124936/1576/1545/6999/1592/8529/114757/1536/4846/23593/847/7837/5740/1562/113612/284541/1559/1555/51167/6948/1549/8288/1543/54905/1593/1580/1558/1548/1551/5742/1573/1582/55640/6947/79400/3163/1565/259/10424/64816/3040/1577/29785/1528/1535/1591
BP	GO:0032613	interleukin-10 production	54	0.589462	2.50705	3.29139e-08	5.95414e-07	3.74227e-07	3841	tags=54%, list=15%, signal=46%	3569/353514/7099/3662/5336/602/6774/7305/3596/7097/64581/3565/80380/959/3593/4317/2213/961/9308/6850/3965/8288/51561/940/27242/3082/11006/28951/64127
BP	GO:0032653	regulation of interleukin-10 production	54	0.589462	2.50705	3.29139e-08	5.95414e-07	3.74227e-07	3841	tags=54%, list=15%, signal=46%	3569/353514/7099/3662/5336/602/6774/7305/3596/7097/64581/3565/80380/959/3593/4317/2213/961/9308/6850/3965/8288/51561/940/27242/3082/11006/28951/64127
BP	GO:0072538	T-helper 17 type immune response	38	0.661911	2.62212	3.30699e-08	5.96859e-07	3.75135e-07	2904	tags=53%, list=12%, signal=47%	3569/5588/80149/10892/3662/3594/10538/114836/4092/4063/6774/64332/64581/57089/3565/3593/149041/51561/6095/84807
BP	GO:0050673	epithelial cell proliferation	364	0.312321	1.79126	3.43241e-08	6.18071e-07	3.88467e-07	3891	tags=27%, list=15%, signal=24%	7538/6347/3037/3725/3397/1969/3569/6387/728/4609/3398/3091/7057/567/7010/864/1893/7472/654/2658/3164/57142/92/5604/8600/4804/240/3357/1992/2099/6422/4070/84913/3162/3676/1910/26051/677/653/7039/3280/595/1960/79812/8742/80173/64919/60485/659/2247/2152/4824/6774/116844/60675/185/5176/6678/11331/8828/7049/3488/3593/7075/9104/1027/1021/5925/10413/5080/2625/5663/1296/94/6369/168667/55145/4163/11235/55…
BP	GO:0002702	positive regulation of production of molecular mediator of immune response	105	0.460544	2.23101	3.44936e-08	6.18984e-07	3.89041e-07	3008	tags=36%, list=12%, signal=32%	26191/1604/975/3569/942/10666/567/3553/3133/10892/114548/7099/8809/5336/3134/3554/9188/5788/8915/6504/91543/7189/3596/972/64581/11126/11331/8741/7805/3565/354/2625/23529/3805/940/170506/59067/3263
BP	GO:0008037	cell recognition	148	0.411479	2.11367	3.45329e-08	6.18984e-07	3.89041e-07	4196	tags=34%, list=17%, signal=29%	6363/6366/975/10666/2220/1949/7852/5322/3543/78989/57142/81704/1236/55118/10584/8547/91624/1794/2219/148229/2042/10332/2350/23022/928/921/64581/923/2047/4692/5551/51294/722/3958/5175/84868/4153/152330/1462/27242/725/6950/56253/721/7455/375033/203102/351/4685/3929/2352
BP	GO:0002690	positive regulation of leukocyte chemotaxis	86	0.498346	2.34838	3.60653e-08	6.44975e-07	4.05377e-07	3295	tags=38%, list=13%, signal=33%	2358/6363/6366/3569/6387/728/7057/63940/5054/1436/1230/6352/1236/719/1906/59341/5880/6504/708/972/729230/199/3565/5641/1240/3965/51561/2185/6688/245937/2621/5764/6348
BP	GO:0001914	regulation of T cell mediated cytotoxicity	38	0.661421	2.62018	3.64329e-08	6.50067e-07	4.08577e-07	5128	tags=66%, list=20%, signal=52%	567/912/3575/3133/8417/3594/3134/3106/5788/3821/3824/3122/3136/3593/2213/51561/911/913/5532/3071/8772/11035/3140/634/3105
BP	GO:0034109	homotypic cell-cell adhesion	85	0.498437	2.33472	3.69082e-08	6.57049e-07	4.12965e-07	6180	tags=55%, list=25%, signal=42%	114897/3572/5156/3569/3716/5588/64805/22915/8600/6352/3717/288/5329/4067/84465/5294/640/928/10077/5341/6814/6850/3611/18/2316/7414/84034/375033/10398/2811/83706/71/4352/5318/10019/10076/634/2243/1824/2244/1511/3043/29119/80139/5270/5478/5962
BP	GO:0048660	regulation of smooth muscle cell proliferation	128	0.43198	2.15801	3.84163e-08	6.82347e-07	4.28865e-07	5074	tags=44%, list=20%, signal=35%	5743/3725/9510/3569/10672/4609/3398/7057/4889/7099/4615/6352/3717/3162/1906/3600/1839/7043/659/57447/2247/4846/7048/3596/5031/4883/199/80310/5724/3488/3593/1027/6648/7520/3486/59272/65009/7128/30008/7124/5728/6772/93649/2773/3480/3479/2771/4331/3458/4313/4881/2697/6869/4969/1535/2006
MF	GO:0033218	amide binding	357	0.305065	1.74151	3.93113e-08	6.96664e-07	4.37864e-07	4649	tags=31%, list=18%, signal=26%	2358/81631/1471/8301/3949/4311/7433/912/3133/4889/7099/5621/4804/2639/8685/4772/3134/10148/10288/1910/3106/1191/3125/10268/1393/33/590/23621/30061/5530/10332/7096/5360/3117/847/2350/712/4481/26953/972/7097/5023/65977/5970/774/27232/3113/4883/2947/11331/6716/1410/5095/929/2289/6344/3107/6342/3119/3115/2028/3122/3136/8315/5204/25907/6715/2213/53354/9452/5306/2346/1240/1889/321/5480/5091/83941/911/2…
BP	GO:0036230	granulocyte activation	41	0.636249	2.57114	4.04143e-08	7.14191e-07	4.4888e-07	3966	tags=63%, list=16%, signal=54%	4615/11314/6372/301/6352/3600/1776/7305/306/2207/729230/820/5724/11027/84106/2213/5320/6814/6850/6844/3689/6688/6348/7124/3684/6845
BP	GO:1900046	regulation of hemostasis	63	0.554474	2.42285	4.04827e-08	7.14191e-07	4.4888e-07	6262	tags=56%, list=25%, signal=42%	4780/114897/5156/7056/710/7057/5054/1906/7001/2152/4846/6915/928/2149/2160/10855/18/5055/5627/5327/7103/1361/2811/3848/857/10019/634/2191/2243/350/2244/5270/5340/3818/6484
BP	GO:0034762	regulation of transmembrane transport	488	0.282627	1.66746	4.18477e-08	7.36614e-07	4.62973e-07	4554	tags=28%, list=18%, signal=23%	6347/1318/4780/5142/25932/4609/7057/2534/3553/2669/5144/5621/5999/5292/288/2040/89822/2745/5336/65018/718/131096/3781/1906/51185/1520/54102/10268/10550/1393/60598/287/3742/55022/1536/4067/6324/5997/6041/57817/3790/7779/2273/596/30845/1193/5311/967/3764/5294/9446/3753/53827/3778/483/3596/53826/5023/729230/760/5031/774/5649/57165/79026/11151/11331/1080/3773/2149/5724/23479/6622/3769/93589/126306/13…
BP	GO:0036336	dendritic cell migration	29	0.699493	2.57047	4.30686e-08	7.56404e-07	4.75411e-07	3174	tags=59%, list=13%, signal=51%	6363/6366/7852/81704/1230/240/6352/1236/5294/6504/708/729230/2059/3965/998/6688/2621
BP	GO:0090130	tissue migration	282	0.32847	1.82635	4.32319e-08	7.57573e-07	4.76146e-07	6036	tags=39%, list=24%, signal=30%	9314/3037/4780/5743/3725/388/3397/1634/1969/3091/7057/7010/80149/2658/3164/57142/5547/301/4070/84913/3162/5336/9839/1906/1545/2113/1839/2294/1960/54453/10982/79812/8742/411/659/2247/9353/4846/9404/5294/6915/23328/5872/11167/7048/306/27286/5176/6678/2013/8828/64218/3565/57111/5606/64094/5641/2625/375056/94/5216/168667/8754/4163/11235/3675/2185/5764/7124/9734/5728/5293/5286/284/6237/3458/23500/6093…
BP	GO:0120254	olefinic compound metabolic process	149	0.408158	2.10143	4.33731e-08	7.58352e-07	4.76635e-07	4276	tags=40%, list=17%, signal=33%	1958/5743/1544/133/5730/654/1571/6916/240/27122/220/1576/1910/1545/653/125/8529/126/54884/127/5959/158584/64577/2950/5740/1562/113612/284541/1559/6716/1555/60481/54361/6342/130/6715/1549/9227/124/10728/8228/1543/1558/1548/10170/1551/5742/50640/27120/1573/8608/2053/57104/1565/11343/30/57665/51635/57406
BP	GO:0070302	regulation of stress-activated protein kinase signaling cascade	179	0.389751	2.0644	4.48752e-08	7.82867e-07	4.92044e-07	3323	tags=34%, list=13%, signal=30%	6363/26191/6366/7164/9611/4609/3553/9770/85458/80149/6386/653361/4616/7099/2308/4615/939/11342/5604/8600/3489/1540/1236/6422/65018/10125/10550/355/9464/4067/80824/59341/5048/5609/2950/7098/29969/23328/6504/7189/64581/56940/2047/51339/3476/51562/4317/2213/4055/10114/5187/11235/54910/998/2185/6688/9618/4281/3082/140885/7124
BP	GO:0060627	regulation of vesicle-mediated transport	490	0.280433	1.65518	4.50294e-08	7.83813e-07	4.92638e-07	4092	tags=28%, list=16%, signal=24%	6347/2358/6363/6366/2619/5359/8301/567/2220/3553/5322/4908/558/78989/5054/6386/51762/11314/5604/301/6401/5533/3162/5336/10584/3134/718/8547/3600/84896/1191/143425/120892/2294/5788/7052/23086/6441/4067/148/1794/2268/5880/2219/967/23621/5530/2042/1265/27236/6504/5872/11031/640/2207/6609/3601/3596/9367/7097/64581/5023/729230/3560/11151/55423/1080/5724/57586/8720/6622/3958/9525/8723/929/3565/3561/571…
BP	GO:0044839	cell cycle G2/M phase transition	128	-0.470183	-2.08525	4.51314e-08	7.83845e-07	4.92659e-07	3060	tags=37%, list=12%, signal=32%	5889/23476/9344/55920/11200/1112/60561/84930/51720/23236/9088/993/8317/51343/1019/51514/1111/994/995/65123/9928/56658/672/25942/57504/26271/9833/80279/51400/2305/26993/891/990/890/6502/1063/9212/10403/57551/9133/6240/29980/84936/808/641/6790/22976
CC	GO:0071013	catalytic step 2 spliceosome	71	-0.562102	-2.28579	4.58864e-08	7.95196e-07	4.99792e-07	4246	tags=46%, list=17%, signal=39%	8899/23398/8896/9775/6633/27339/6629/23524/22913/6627/6628/6634/6636/51340/55596/8175/3192/24144/57819/6635/10992/51645/10946/55094/9716/55696/6637/9343/23759/51428/1659/9416/60625
MF	GO:0005506	iron ion binding	131	0.428964	2.16284	4.93414e-08	8.53181e-07	5.36237e-07	5463	tags=44%, list=22%, signal=34%	9023/1544/316/51302/2395/1571/6916/240/1576/1545/8424/1592/8529/114757/55239/9843/5740/1562/54790/113612/284541/23474/1559/1555/23479/6622/5033/2495/1549/1543/54905/1593/79966/1580/2230/6059/1558/1548/1551/1573/26234/1582/94033/1565/64816/55256/3040/221120/1577/242/29785/1591/121278/1579/79068/5264/8846
MF	GO:0019838	growth factor binding	126	0.431907	2.16601	4.951e-08	8.5421e-07	5.36884e-07	4340	tags=41%, list=17%, signal=34%	3572/5156/3977/1969/2/7057/2022/6386/92/4804/3587/3489/7850/3554/8425/3485/7043/2615/3490/7837/85409/7048/9180/27286/3560/51232/347252/3557/8828/7049/3488/3561/2322/25987/57045/94/3486/9702/64285/3483/4915/199713/8539/6284/8692/6187/1281/90/1289/3480/2690/79651
BP	GO:0010517	regulation of phospholipase activity	61	0.562704	2.46177	5.15593e-08	8.87614e-07	5.57878e-07	3201	tags=48%, list=13%, signal=42%	5156/942/10672/728/64805/3702/5322/1902/301/6401/6352/3357/2099/148/5997/2247/5031/185/11331/7294/5724/6622/9373/2769/27/653145/5741/3208/5330
BP	GO:2000107	negative regulation of leukocyte apoptotic process	47	0.603102	2.49316	5.25163e-08	9.02106e-07	5.66987e-07	1566	tags=36%, list=6%, signal=34%	6363/6366/3665/5588/6387/3091/3575/558/3059/81704/939/84941/1831/6352/1236/8915/972
BP	GO:0061756	leukocyte adhesion to vascular endothelial cell	45	0.611407	2.51382	5.26636e-08	9.02657e-07	5.67334e-07	3323	tags=53%, list=13%, signal=46%	9314/6366/3569/6387/6402/10164/240/6401/3676/6403/2113/340481/64116/7189/6404/729230/5970/5724/3695/119/2529/3689/58494/7124
MF	GO:0016712	oxidoreductase activity, acting on paired donors, with incorporation or reduction of molecular oxygen, reduced flavin or flavoprotein as one donor, and incorporation of one atom of oxygen	38	0.656792	2.60184	5.36991e-08	9.18394e-07	5.77225e-07	5285	tags=68%, list=21%, signal=54%	1544/51302/1571/3162/1576/1545/8529/1562/113612/1559/1555/1549/1543/54905/1580/1558/1548/1551/1573/3163/1565/64816/1577/29785/51004/1579
BP	GO:0043030	regulation of macrophage activation	54	0.583829	2.48309	5.6646e-08	9.66684e-07	6.07575e-07	3708	tags=52%, list=15%, signal=44%	9173/3569/7057/3949/80149/8530/7099/90865/11326/120892/5788/57817/23729/3596/972/6622/3565/84868/7107/4317/2213/3727/8832/1075/6095/6348/472/23208
BP	GO:0051783	regulation of nuclear division	127	-0.470145	-2.08151	5.75337e-08	9.79699e-07	6.15755e-07	3046	tags=38%, list=12%, signal=33%	5155/56155/9820/57026/51434/55055/652/2253/10419/11105/23236/9088/27085/286053/51343/3209/1104/1111/11130/995/4751/157313/9319/7756/51433/55755/4085/699/10635/51529/26271/9700/7272/891/991/81620/29945/1063/9212/10403/51203/9735/7517/4288/286151/84861/8697/6790
BP	GO:0090132	epithelium migration	277	0.332529	1.85484	5.9024e-08	1.0029e-06	6.30335e-07	6036	tags=40%, list=24%, signal=31%	9314/3037/4780/5743/3725/388/3397/1634/1969/3091/7057/7010/80149/2658/3164/57142/5547/301/4070/84913/3162/5336/9839/1906/1545/2113/1839/1960/54453/10982/79812/8742/411/659/2247/9353/4846/9404/5294/6915/23328/5872/11167/7048/306/27286/5176/6678/2013/8828/64218/3565/57111/5606/64094/5641/2625/375056/94/5216/168667/8754/4163/11235/3675/2185/5764/7124/9734/5728/5293/5286/284/6237/3458/23500/6093/7424…
BP	GO:0006066	alcohol metabolic process	319	0.316007	1.7847	5.97749e-08	1.01346e-06	6.36972e-07	4209	tags=33%, list=17%, signal=27%	9023/1544/3949/51302/1621/319/654/81537/5805/114876/27122/220/54657/27010/5336/1576/27284/1910/1545/5593/3931/653/125/2643/128/80168/51141/33/126/219/54884/127/5959/114879/2247/847/26002/1562/6609/6783/10449/5031/2712/1559/1080/2330/5724/8720/6622/54361/3565/130/170685/25987/5341/10558/8867/9227/217/124/8228/2232/1543/6652/54363/2672/427/1593/9517/1066/8821/5741/1071/37/2230/2185/10613/1558/4790/…
BP	GO:0042119	neutrophil activation	36	0.659908	2.56143	6.21399e-08	1.05128e-06	6.60744e-07	3966	tags=64%, list=16%, signal=54%	4615/11314/6372/301/6352/3600/1776/7305/306/2207/820/5724/11027/84106/2213/5320/6814/6850/3689/6688/7124/3684/6845
BP	GO:0001911	negative regulation of leukocyte mediated cytotoxicity	25	0.736153	2.64525	6.24067e-08	1.05352e-06	6.62151e-07	5128	tags=80%, list=20%, signal=64%	1398/3575/3133/5272/3134/3106/5788/3821/3824/84868/2213/3965/3805/387837/409/5532/3071/100507436/634/3105
BP	GO:0019886	antigen processing and presentation of exogenous peptide antigen via MHC class II	27	0.718189	2.59896	6.40596e-08	1.07909e-06	6.78227e-07	4257	tags=67%, list=17%, signal=55%	567/1520/3125/3117/2207/7189/972/3113/3119/3115/3122/3111/2213/5641/3126/3109/8722/3112
BP	GO:0045089	positive regulation of innate immune response	126	0.429169	2.15228	6.44492e-08	1.08333e-06	6.80887e-07	3034	tags=37%, list=12%, signal=33%	2358/3665/5359/10666/3428/81030/912/2534/5322/3133/7099/6352/5336/3134/10125/4067/114836/2219/149628/839/4068/7305/51311/7189/115362/64581/661/11126/3824/7294/11027/3823/9111/3902/84868/4153/9447/3593/85363/7520/4332/6850/3055/3805/59067/3263/6688
BP	GO:0061045	negative regulation of wound healing	67	0.534542	2.37583	6.53919e-08	1.09682e-06	6.89368e-07	6235	tags=61%, list=25%, signal=46%	1398/114897/5156/7056/710/7057/22915/5054/240/1906/90102/2247/4846/928/325/58189/54361/2160/6558/18/5055/58529/5627/7124/5327/7103/1361/5728/2811/3848/10019/634/2191/2243/55966/350/2244/83481/5270/5340/3818
CC	GO:0001772	immunological synapse	40	0.629543	2.52176	6.62902e-08	1.10951e-06	6.97344e-07	3786	tags=55%, list=15%, signal=47%	975/5588/8417/951/8631/3002/3001/8915/923/11151/916/963/3958/84868/3122/84433/3383/7535/940/9306/56253/3932
BP	GO:0060191	regulation of lipase activity	82	0.502107	2.31326	6.68075e-08	1.11579e-06	7.01288e-07	3420	tags=39%, list=14%, signal=34%	5156/942/10672/728/64805/3702/5322/1902/301/6401/6352/3357/2099/148/5997/2247/5031/185/11331/7294/5724/6622/9373/2769/27/653145/51099/5741/7376/3208/5330/9734
BP	GO:0008210	estrogen metabolic process	35	0.663473	2.55997	6.73568e-08	1.12257e-06	7.0555e-07	4917	tags=60%, list=20%, signal=48%	5156/25976/1544/54658/1576/1545/3294/51170/6783/1559/54577/51144/7366/7923/1543/1558/1551/54659/1565/7367/1577
MF	GO:0008009	chemokine activity	47	0.600875	2.48396	6.80765e-08	1.12975e-06	7.10066e-07	5612	tags=55%, list=22%, signal=43%	6347/6363/6366/6387/9547/6372/6352/6368/2920/388372/414062/6349/6359/4283/6369/2919/6348/6362/6367/2921/6361/6360/3627/5196/6373/6355
BP	GO:0030193	regulation of blood coagulation	61	0.559621	2.44828	6.8058e-08	1.12975e-06	7.10066e-07	6262	tags=57%, list=25%, signal=43%	4780/114897/5156/7056/710/7057/5054/1906/7001/2152/4846/6915/928/2149/2160/10855/18/5055/5627/5327/7103/1361/2811/3848/857/10019/634/2191/2243/350/2244/5270/5340/3818/6484
BP	GO:0055076	transition metal ion homeostasis	126	0.428035	2.1466	6.9605e-08	1.15268e-06	7.24474e-07	3786	tags=37%, list=15%, signal=32%	1318/4499/4502/4493/4494/4609/3091/8301/567/6279/4501/654/2658/4489/5621/2395/79901/79689/3162/51076/6341/57817/7779/6280/30061/4495/64116/9843/81894/1356/2034/4496/23479/55240/2495/6648/6505/6556/4756/286133/3263/10463/26234/8692/94033/3163/3932
BP	GO:1905818	regulation of chromosome separation	67	-0.572705	-2.30418	6.99618e-08	1.15614e-06	7.26651e-07	3893	tags=48%, list=15%, signal=40%	64682/56155/55743/51434/55055/286053/11130/9319/7756/51433/55755/4085/699/51529/9232/26271/9700/1062/7272/891/990/81620/29945/1063/9212/10403/10460/9735/7517/11065/84861/8697
BP	GO:0031294	lymphocyte costimulation	46	0.604146	2.49857	7.06965e-08	1.15851e-06	7.28138e-07	4355	tags=57%, list=17%, signal=47%	6363/6366/975/942/2534/1949/10673/1236/10288/4067/921/11126/916/1326/3565/80380/959/84433/29851/940/11006/3932/941/7525/11148/857
BP	GO:0035296	regulation of tube diameter	131	0.424735	2.14152	7.05331e-08	1.15851e-06	7.28138e-07	5544	tags=43%, list=22%, signal=34%	5743/133/10365/1621/6916/3357/1906/1910/27345/2643/148/5997/2296/659/340481/147/4846/6915/3778/5910/151/5023/185/10800/4883/2149/80852/6648/1889/9732/6649/6546/59272/796/7124/9474/2729/154/952/5286/150/3741/6647/857/6093/342527/4313/4881/6869/153/10911/3779/2243/3363/387/2244
BP	GO:0097746	blood vessel diameter maintenance	131	0.424735	2.14152	7.05331e-08	1.15851e-06	7.28138e-07	5544	tags=43%, list=22%, signal=34%	5743/133/10365/1621/6916/3357/1906/1910/27345/2643/148/5997/2296/659/340481/147/4846/6915/3778/5910/151/5023/185/10800/4883/2149/80852/6648/1889/9732/6649/6546/59272/796/7124/9474/2729/154/952/5286/150/3741/6647/857/6093/342527/4313/4881/6869/153/10911/3779/2243/3363/387/2244
BP	GO:0010466	negative regulation of peptidase activity	229	0.350902	1.90268	7.06938e-08	1.15851e-06	7.28138e-07	4919	tags=35%, list=20%, signal=29%	9314/5743/2/710/3428/7057/1471/8301/5271/1893/7980/5054/3164/8530/939/5272/5621/960/831/25816/1992/5329/718/56925/9806/7078/5858/10972/358/5176/51232/6694/5918/5267/256394/1410/58189/6622/3476/10653/128488/1508/329/1378/653145/7079/684/1654/7076/5055/199713/10935/2621/6653/5627/720/10406/3082/7124/8434/12/721/6590/643394/112401/409/4018/1285/221476/259/351/2537/4803/10879/6093/3700/1470/64780/511…
BP	GO:0045444	fat cell differentiation	208	0.361726	1.94218	7.27326e-08	1.18938e-06	7.47545e-07	3776	tags=30%, list=15%, signal=26%	7538/9314/284207/1959/5743/5156/3569/3398/22933/11007/122953/51316/678/80149/3164/2308/79689/240/5292/25979/1052/4091/6422/677/2869/23414/83643/3280/595/5997/6041/59341/60485/8651/30812/116844/6783/583/25937/9935/1389/6648/10413/2625/114885/1240/84159/3400/6095/2487/64318/4329/51320/3589/7124/27120/123016/2170/154/3638/4929/28951
BP	GO:0031342	negative regulation of cell killing	28	0.704051	2.57646	7.34694e-08	1.19893e-06	7.53545e-07	5128	tags=79%, list=20%, signal=63%	1398/3575/3133/5272/3134/3106/5788/3821/3596/3824/3565/84868/2213/3965/3805/387837/409/5532/3071/100507436/634/3105
BP	GO:0042267	natural killer cell mediated cytotoxicity	66	0.538989	2.37859	7.45565e-08	1.21414e-06	7.63105e-07	5128	tags=55%, list=20%, signal=44%	1398/10666/3133/5272/3134/3106/10125/3002/114836/4068/3821/11151/11126/57823/3824/3823/3902/84868/3593/3965/3805/59067/201294/387837/79465/56253/4818/5873/409/6845/100507436/8302/3822/55207/634/3105
BP	GO:0045576	mast cell activation	60	0.556197	2.42728	7.57228e-08	1.23057e-06	7.73434e-07	3966	tags=45%, list=16%, signal=38%	5359/10666/695/5730/11314/6283/3162/10125/2294/4067/2268/5880/5294/3937/640/3596/8723/3565/8773/8832/6850/3965/3598/201294/6284/5293/6845
BP	GO:0030183	B cell differentiation	136	0.414088	2.10175	7.70949e-08	1.25028e-06	7.85819e-07	3860	tags=34%, list=15%, signal=29%	3569/3398/695/678/10673/10892/939/973/6422/3676/5336/677/5788/602/139818/112616/596/3635/3565/931/159296/959/84433/2322/2213/1378/22806/9452/3394/23529/5450/6850/55619/4066/115352/59067/2185/6688/3589/9734/974/472/1316/3574/55012/3456
BP	GO:0031295	T cell costimulation	44	0.619632	2.53198	8.27459e-08	1.33915e-06	8.41676e-07	4355	tags=57%, list=17%, signal=47%	6363/6366/975/942/2534/1949/10673/1236/10288/4067/921/11126/916/1326/80380/959/84433/29851/940/11006/3932/941/7525/11148/857
BP	GO:0048659	smooth muscle cell proliferation	129	0.428358	2.14567	8.43213e-08	1.36183e-06	8.55932e-07	5074	tags=43%, list=20%, signal=35%	5743/3725/9510/3569/10672/4609/3398/7057/4889/7099/4615/6352/3717/3162/1906/3600/1839/7043/659/57447/2247/4846/7048/3596/5031/4883/199/80310/5724/3488/3593/1027/6648/7520/3486/59272/65009/7128/30008/7124/5728/6772/93649/2773/3480/3479/2771/4331/3458/4313/4881/2697/6869/4969/1535/2006
BP	GO:0071887	leukocyte apoptotic process	102	0.459266	2.21979	8.45262e-08	1.36233e-06	8.56246e-07	4691	tags=43%, list=19%, signal=35%	6363/6366/3569/3665/5588/6387/695/3091/3575/558/3059/29124/81704/939/84941/301/6194/1831/6352/1236/355/4067/2737/8915/640/80301/972/917/155038/3958/1178/3965/27242/2621/6950/3707/5728/5293/64127/6482/8772/11035/6480/23411
BP	GO:2000106	regulation of leukocyte apoptotic process	79	0.504034	2.31537	8.91319e-08	1.43362e-06	9.01049e-07	4691	tags=47%, list=19%, signal=38%	6363/6366/3665/5588/6387/695/3091/3575/558/3059/29124/81704/939/84941/301/1831/6352/1236/4067/8915/640/972/917/155038/3958/3965/2621/6950/3707/5728/5293/64127/6482/8772/11035/6480/23411
BP	GO:0031589	cell-substrate adhesion	332	0.314455	1.79628	9.70025e-08	1.55701e-06	9.78604e-07	4138	tags=29%, list=16%, signal=24%	1398/3037/3397/6366/9748/7057/7010/10319/25890/22998/10894/558/5054/1308/91663/960/10516/11170/3717/1236/4091/6422/55742/4070/11117/3676/3680/9806/2633/59277/2294/8631/10225/90102/54453/596/1842/5880/967/11093/2042/84168/4739/9404/708/2199/59339/56940/2047/11151/916/2013/54361/6614/51144/10855/64005/9358/3987/3695/1021/1307/94/3611/9341/7007/8754/64098/10174/3675/3681/6548/201294/3694/998/27185/3…
BP	GO:0072676	lymphocyte migration	105	0.450053	2.18019	9.74465e-08	1.56094e-06	9.81073e-07	5612	tags=49%, list=22%, signal=38%	1398/6347/6363/6366/9023/6387/1893/81704/6352/1236/6368/3676/388372/6288/5294/414062/729230/199/1667/64005/6558/3383/7535/6349/3695/6359/2625/375056/6793/6369/2529/2185/2621/58494/6348/56253/5293/6362/11240/351/6367/8772/11035/6361/6360/3627/4478/6373/102/387/6355
BP	GO:0006690	icosanoid metabolic process	108	0.441915	2.15246	9.84161e-08	1.57325e-06	9.88812e-07	3912	tags=38%, list=16%, signal=32%	5743/1544/3553/5322/2687/5730/1571/6916/4056/301/240/7132/1906/1545/241/8529/158584/2950/5740/1562/113612/972/7097/284541/1559/1555/64174/9373/1549/10728/6850/1543/1558/1548/5742/50640/1573/51/1565/4259/11343
BP	GO:0043491	protein kinase B signaling	176	0.386776	2.02916	9.92069e-08	1.58266e-06	9.94727e-07	4142	tags=33%, list=16%, signal=28%	6347/6363/114897/6366/1969/10253/22933/7057/64805/7010/3553/55273/2022/558/3084/3059/57142/8600/6352/1236/65018/85453/55024/6425/677/10268/1839/1116/2247/2152/4824/5294/708/23533/3488/10855/2625/56917/3611/940/4915/2621/389400/6348/7124/8692/57333/92140/5728/1263/375033/5293/409/284/6237/3480/3479/5008
BP	GO:0010631	epithelial cell migration	275	0.334286	1.86544	9.96392e-08	1.58633e-06	9.97031e-07	6036	tags=40%, list=24%, signal=30%	9314/3037/4780/5743/3725/388/3397/1634/1969/3091/7057/7010/80149/2658/3164/57142/5547/301/4070/84913/3162/5336/9839/1906/1545/2113/1839/1960/54453/10982/79812/8742/411/659/2247/9353/4846/9404/5294/6915/23328/5872/11167/7048/306/27286/5176/6678/2013/8828/64218/3565/57111/5606/64094/5641/2625/375056/94/5216/168667/8754/4163/11235/3675/2185/5764/7124/9734/5728/5293/5286/284/6237/3458/23500/6093/7424…
BP	GO:0097237	cellular response to toxic substance	104	0.460588	2.23272	1.06179e-07	1.68579e-06	1.05955e-06	4437	tags=36%, list=18%, signal=29%	4780/5743/10516/4056/5292/2745/65018/241/2098/10549/7001/2643/128/114757/127/64359/6280/1193/2950/4846/847/9446/7837/2947/6648/8288/6649/29914/9973/10935/7124/5742/2954/4259/3240/6647/4257
BP	GO:0003012	muscle system process	394	0.296842	1.71159	1.06317e-07	1.68579e-06	1.05955e-06	4736	tags=31%, list=19%, signal=26%	5743/3572/5142/2775/7852/3553/5144/80149/7133/3164/2308/5999/3357/3162/7132/3781/1906/3600/1910/287/2934/4608/7111/9172/9464/10611/148/6324/5997/57817/59341/30845/1193/4092/5530/340481/147/4846/3764/5294/6915/9446/3753/3778/5910/6442/60675/151/5023/23493/55959/2149/199/5724/1410/3281/3488/8082/2627/444/5606/80852/126306/7140/2628/4638/5020/29995/9732/6444/26287/6546/59272/18/6548/796/4634/2258/80…
MF	GO:0140030	modification-dependent protein binding	134	-0.457036	-2.04124	1.08141e-07	1.71125e-06	1.07554e-06	5499	tags=42%, list=22%, signal=33%	5977/359787/7158/1616/130617/3720/338692/222229/23198/6046/11137/55023/26147/2332/6597/138474/10927/79931/5710/23476/80764/26009/84733/8535/23310/54764/29128/23468/9666/51720/56893/3300/7415/169981/6872/29057/54892/23170/139886/54799/8805/84126/2956/124930/57680/55689/11335/30827/55072/8019/65980/23613/11091/55666/23512/83746
BP	GO:0060193	positive regulation of lipase activity	62	0.534247	2.33461	1.09731e-07	1.7329e-06	1.08916e-06	3201	tags=44%, list=13%, signal=38%	5156/942/10672/728/64805/3702/5322/1902/6401/6352/3357/2099/148/2247/5031/185/11331/7294/5724/9373/2769/27/51099/5741/7376/3208/5330
BP	GO:0002478	antigen processing and presentation of exogenous peptide antigen	34	0.658556	2.53286	1.112e-07	1.75258e-06	1.10152e-06	5128	tags=68%, list=20%, signal=54%	567/3133/3134/1520/3125/3117/2207/7189/972/3113/3119/3115/3122/50856/3111/2213/5641/3126/3109/8722/3112/3551/3105
BP	GO:0006270	DNA replication initiation	27	-0.722283	-2.3753	1.13462e-07	1.78463e-06	1.12167e-06	5246	tags=85%, list=21%, signal=67%	11073/1017/222229/51053/5558/25792/56897/5557/64785/29935/4175/4173/4176/55388/4172/898/990/81620/4174/4171/5422/23649/9134
BP	GO:0042269	regulation of natural killer cell mediated cytotoxicity	43	0.615494	2.52026	1.13831e-07	1.78685e-06	1.12306e-06	5128	tags=63%, list=20%, signal=50%	1398/10666/3133/5272/3134/3106/10125/114836/4068/3821/11126/3824/3823/3902/84868/3593/3965/3805/59067/387837/56253/409/100507436/8302/3822/634/3105
BP	GO:0045834	positive regulation of lipid metabolic process	135	0.404116	2.04239	1.16187e-07	1.82018e-06	1.14401e-06	4330	tags=33%, list=17%, signal=28%	2358/5743/6363/5156/6366/975/64805/133/3949/7010/3553/23417/654/301/1236/3357/824/83643/4067/2268/345275/2247/972/185/60481/54361/1389/2322/9104/51099/376497/1066/998/7376/2185/23410/7124/10580/2170/57104/64127/3480/57406/13/3458
BP	GO:0045621	positive regulation of lymphocyte differentiation	101	0.451819	2.17543	1.20302e-07	1.88088e-06	1.18216e-06	4612	tags=48%, list=18%, signal=39%	6363/942/695/864/3575/558/10892/114548/939/301/3594/10288/3600/10125/5788/1960/3635/2737/64332/8651/7048/3601/972/2736/3565/3122/3593/7535/1378/2625/9308/6850/3965/51561/84807/3142/865/2621/11006/5105/3707/3574/55012/3071/941/3458/2309/7704
BP	GO:0001773	myeloid dendritic cell activation	28	0.698688	2.55683	1.21478e-07	1.89279e-06	1.18965e-06	3034	tags=57%, list=12%, signal=50%	55509/3662/10538/1794/914/6504/7048/7189/3565/84868/10077/4055/5663/116071/3694/6688
BP	GO:0045861	negative regulation of proteolysis	303	0.318552	1.79168	1.21547e-07	1.89279e-06	1.18965e-06	4583	tags=32%, list=18%, signal=27%	9314/5743/2619/2/710/3428/7057/1471/8301/5271/1893/7980/5054/6386/3164/8530/939/5272/5621/143941/960/831/25816/1992/7850/5329/718/56925/9806/7078/120892/11345/9349/5858/10972/358/5176/51232/6694/5918/5267/256394/1410/58189/6622/29761/3476/9528/10653/128488/6125/210/1459/1508/329/1378/5663/653145/7079/684/1654/7076/7376/5055/199713/10935/2621/6653/5627/720/10406/3082/7124/8434/5327/12/721/6590/136…
BP	GO:0006968	cellular defense response	52	0.575002	2.43029	1.2256e-07	1.90479e-06	1.19719e-06	3009	tags=46%, list=12%, signal=41%	728/3702/653361/90865/922/10288/4068/50852/8915/23643/7305/729230/5970/5551/3823/8061/10219/4283/10803/4688/4332/3808/3805/2185
BP	GO:0010632	regulation of epithelial cell migration	212	0.356156	1.90921	1.23432e-07	1.91455e-06	1.20332e-06	5723	tags=40%, list=23%, signal=31%	9314/3037/4780/5743/3725/388/1634/1969/3091/7057/7010/80149/2658/57142/5547/301/4070/84913/3162/5336/1906/2113/1839/54453/10982/79812/411/659/2247/9353/4846/5294/6915/23328/7048/306/27286/5176/6678/2013/8828/64218/3565/57111/5606/64094/5641/2625/94/5216/168667/8754/4163/11235/3675/2185/5764/7124/9734/5728/5293/5286/284/6237/3458/7424/147372/55466/5793/23411/6776/6869/634/1647/57381/14/350/10000/3…
CC	GO:0042611	MHC protein complex	25	0.728473	2.61765	1.24059e-07	1.92046e-06	1.20704e-06	5128	tags=76%, list=20%, signal=61%	567/3133/3134/3106/3125/3117/972/3113/3107/3119/3115/3122/3136/3111/3126/3109/3112/3140/3105
BP	GO:0032757	positive regulation of interleukin-8 production	58	0.558193	2.42821	1.28153e-07	1.96948e-06	1.23785e-06	4366	tags=55%, list=17%, signal=46%	3569/3553/5054/2658/7099/4615/1116/2219/914/7098/2152/8915/7096/6774/51311/972/7097/64581/5970/2149/11027/929/965/6850/3965/7124/8692/64127/84632/3929/51284/8772
BP	GO:0034308	primary alcohol metabolic process	99	0.453079	2.1789	1.28231e-07	1.96948e-06	1.23785e-06	4209	tags=39%, list=17%, signal=33%	1544/654/27122/220/27010/1576/27284/1910/1545/653/125/128/126/219/54884/127/5959/1562/6783/54361/130/9227/217/124/8228/1543/54363/1558/10170/1551/84869/224/8608/2819/57104/1565/57665/3479/51635
BP	GO:0051225	spindle assembly	97	-0.507981	-2.17741	1.27997e-07	1.96948e-06	1.23785e-06	5783	tags=53%, list=23%, signal=41%	1778/3796/1453/4292/23332/10274/79643/225689/347688/26054/81027/9371/80254/203068/10844/4733/11200/27229/440270/23015/8658/8243/8841/3837/3832/1104/3192/4751/2801/7756/10615/259266/55125/8086/26271/22974/24137/29127/29899/991/9493/9212/10403/3619/9133/85378/3833/56992/9055/29901/6790
BP	GO:0035150	regulation of tube size	132	0.428439	2.15942	1.27885e-07	1.96948e-06	1.23785e-06	5544	tags=43%, list=22%, signal=34%	5743/133/10365/1621/6916/3357/1906/1910/27345/2643/148/5997/2296/659/340481/147/4846/6915/3778/5910/151/5023/185/10800/4883/2149/80852/6648/1889/7484/9732/6649/6546/59272/796/7124/9474/2729/154/952/5286/150/3741/6647/857/6093/342527/4313/4881/6869/153/10911/3779/2243/3363/387/2244
BP	GO:0007565	female pregnancy	172	0.385046	2.0094	1.29929e-07	1.99165e-06	1.25178e-06	4474	tags=35%, list=18%, signal=29%	3726/2354/2353/5743/7056/133/3553/639/54407/2099/5671/824/1393/3485/5997/596/7043/5858/659/3490/5069/708/7048/5066/151/2013/54361/3488/8061/84868/5678/1508/1307/3965/5020/5368/412/59272/116/7076/3675/2529/796/10935/5764/23641/8434/7421/1394/10370/952/51673/397/150/81539/259/1828/2056/6647/3976/4313
BP	GO:0022618	ribonucleoprotein complex assembly	127	-0.463149	-2.05053	1.33639e-07	2.04451e-06	1.28501e-06	4943	tags=43%, list=20%, signal=35%	10907/58155/1968/54475/8607/545/6128/7458/1660/55164/51631/25929/6633/79833/22827/27339/1653/6169/3326/9733/84231/4686/64963/6631/5591/11052/10419/6628/29777/23195/6732/5433/22907/140801/6634/51154/54505/6636/51340/8175/57819/6635/10946/9129/8894/26576/3692/26121/6637/8562/8161/25804/26284/10713/9416
BP	GO:0061982	meiosis I cell cycle process	99	-0.504396	-2.15469	1.35752e-07	2.0728e-06	1.30279e-06	6041	tags=49%, list=24%, signal=38%	143471/164045/55124/5885/83990/4438/4292/80198/56154/225689/1761/317761/391714/27030/10919/84690/5889/8438/84057/1164/11144/51547/11105/146956/11077/993/25788/29893/2177/116138/7589/994/29988/995/9319/10111/10635/9232/26271/9700/898/2956/10403/9133/80010/9134/7153/6790/4439
BP	GO:0002820	negative regulation of adaptive immune response	58	0.557339	2.42449	1.36212e-07	2.07578e-06	1.30466e-06	4072	tags=45%, list=16%, signal=38%	9173/64092/1604/3575/80149/3134/5788/339390/4092/3821/6504/56940/11126/3824/722/3565/84868/2213/1378/149041/725/11006/64127/3456/5532/3071
BP	GO:0048871	multicellular organismal homeostasis	475	0.283519	1.66283	1.39404e-07	2.1203e-06	1.33264e-06	4442	tags=29%, list=18%, signal=24%	1958/3037/284207/5743/4982/3397/3569/3908/56034/567/9696/51316/7852/3553/1621/654/1436/79054/7099/2308/8600/5547/3662/8809/4938/3717/25979/3600/1910/2104/79705/5334/10400/8529/33/6441/28512/57817/59341/596/3635/2296/30061/8842/64116/4858/4846/6774/3845/7314/58488/358/249/7189/3596/729230/2034/583/4692/5567/11151/4883/25937/57561/1080/2149/4069/1666/9079/29887/3565/143689/5175/50486/7107/6558/2834…
BP	GO:0002495	antigen processing and presentation of peptide antigen via MHC class II	29	0.685533	2.51917	1.433e-07	2.17533e-06	1.36723e-06	4257	tags=62%, list=17%, signal=52%	567/1520/3125/3117/2207/7189/972/3113/3119/3115/3122/3111/2213/5641/3126/3109/8722/3112
BP	GO:0002504	antigen processing and presentation of peptide or polysaccharide antigen via MHC class II	31	0.680561	2.5699	1.44053e-07	2.18253e-06	1.37175e-06	4727	tags=65%, list=19%, signal=52%	7057/567/1520/3125/3117/2207/7189/972/3113/3119/3115/3122/3111/2213/5641/3126/3109/8722/3112/55207
BP	GO:0006979	response to oxidative stress	383	0.298077	1.71921	1.45397e-07	2.19864e-06	1.38188e-06	4579	tags=29%, list=18%, signal=24%	4170/1398/2353/4780/5743/3725/388/5156/3569/5516/9124/695/22933/3091/8575/10365/2534/558/80149/4482/653361/7099/2308/1827/5621/2395/10516/1571/135112/301/240/10628/3717/3162/65018/1906/1545/824/10549/10550/120892/7001/2643/114757/596/5311/2530/2950/4846/847/7837/358/5970/2034/5151/11030/199/80310/8382/253827/1410/6622/8061/6898/4153/50484/210/6648/8321/5663/8288/6505/54363/26287/6649/8754/6546/11…
BP	GO:1903556	negative regulation of tumor necrosis factor superfamily cytokine production	56	0.562894	2.41353	1.49106e-07	2.25037e-06	1.41439e-06	4140	tags=50%, list=16%, signal=42%	26191/11213/558/80149/7099/5443/245928/706/23547/602/2841/2950/6504/3565/84868/50856/945/3965/2621/7128/140885/11006/23405/23208/409/64127/3479/3929
BP	GO:0030888	regulation of B cell proliferation	61	0.550141	2.40681	1.53368e-07	2.31026e-06	1.45203e-06	4341	tags=51%, list=17%, signal=42%	975/695/10673/7099/11314/5788/4067/596/3635/23495/7305/640/3596/972/3565/84433/2213/22806/4332/23529/149041/1493/115352/59067/27242/57162/472/3574/952/3071/683
MF	GO:0001664	G protein-coupled receptor binding	259	0.337728	1.87537	1.56979e-07	2.36011e-06	1.48337e-06	5158	tags=34%, list=21%, signal=27%	2357/6347/6363/6366/3716/10672/6387/2775/9547/133/2534/5144/7472/6386/84870/5443/5621/6372/6352/8685/3717/9630/6422/6368/718/1906/1910/2920/388372/54102/2219/60485/5173/6288/708/414062/60675/729230/185/57561/54361/4920/2769/6349/6359/4283/8321/5020/7484/6369/5368/116/5741/2919/796/2915/6348/7375/2316/7479/6772/5731/409/6362/114928/150/2773/6367/2771/6863/346562/7482/2921/7475/9455/54550/6361/6360…
BP	GO:0010948	negative regulation of cell cycle process	236	-0.389931	-1.86401	1.6495e-07	2.47519e-06	1.5557e-06	2954	tags=28%, list=12%, signal=25%	55055/652/55159/9344/11200/5591/1112/60561/9656/8658/146956/51720/27085/4591/29935/51343/5933/2177/4436/51514/1111/5514/1763/11130/4221/65123/5883/4751/54962/9319/7756/835/56658/55755/4085/672/699/9232/26271/9031/4193/9700/8914/7272/80279/84126/891/144455/990/81620/1063/9212/10403/9735/57551/7517/29980/84936/8563/51512/2146/286151/10432/84861/641/899/9984
BP	GO:0032720	negative regulation of tumor necrosis factor production	54	0.572113	2.43326	1.68021e-07	2.51646e-06	1.58163e-06	4140	tags=52%, list=16%, signal=43%	26191/11213/558/80149/7099/5443/245928/706/23547/602/2841/2950/6504/3565/84868/50856/945/3965/2621/7128/140885/11006/23405/23208/409/64127/3479/3929
BP	GO:0045841	negative regulation of mitotic metaphase/anaphase transition	38	-0.651712	-2.32427	1.72067e-07	2.57214e-06	1.61663e-06	1553	tags=42%, list=6%, signal=40%	11130/9319/7756/55755/4085/699/26271/7272/891/81620/1063/9212/10403/9735/7517/84861
BP	GO:0072539	T-helper 17 cell differentiation	27	0.704865	2.55074	1.7398e-07	2.59085e-06	1.62839e-06	2904	tags=67%, list=12%, signal=59%	3569/80149/10892/3662/3594/10538/114836/4092/4063/6774/64332/57089/3565/3593/149041/51561/6095/84807
BP	GO:1990748	cellular detoxification	98	0.463606	2.22281	1.73777e-07	2.59085e-06	1.62839e-06	4437	tags=36%, list=18%, signal=30%	4780/5743/10516/4056/5292/2745/241/2098/10549/7001/2643/128/114757/127/64359/6280/1193/2950/4846/847/9446/7837/2947/6648/8288/6649/29914/9973/10935/5742/2954/4259/3240/6647/4257
BP	GO:0046395	carboxylic acid catabolic process	215	0.357091	1.93177	1.76486e-07	2.62318e-06	1.64871e-06	7450	tags=50%, list=30%, signal=35%	23417/51166/2639/55862/8942/10999/6999/1592/8529/33/84693/64577/4846/549/10449/1666/3155/51380/5095/60496/6342/594/6898/10157/1738/160428/197257/2653/1376/2108/3242/1962/54363/54905/38/8564/8310/593/2110/18/37/3712/4329/132789/83752/6470/51268/64087/5105/2954/6718/80896/55577/5446/51/3176/51390/443/54511/30/64902/26275/5009/55289/2184/34/2875/390916/137872/10841/3033/27034/27165/144193/1579/8647/…
BP	GO:0016101	diterpenoid metabolic process	82	0.491018	2.26218	1.76872e-07	2.62393e-06	1.64918e-06	5591	tags=52%, list=22%, signal=41%	1544/54658/220/1576/1545/125/1592/128/126/54884/127/5959/64577/1562/54577/130/6715/9227/5947/124/8228/1543/54905/1558/5949/10170/1551/224/8608/54659/57104/54600/1565/57665/51635/55825/1577/29785/145226/151056/5950/4035/317749
BP	GO:0032872	regulation of stress-activated MAPK cascade	176	0.381937	2.00378	1.81384e-07	2.68579e-06	1.68806e-06	3323	tags=34%, list=13%, signal=29%	6363/26191/6366/7164/9611/4609/3553/9770/85458/80149/6386/653361/4616/7099/2308/4615/939/5604/8600/3489/1540/1236/6422/65018/10125/10550/355/9464/80824/59341/5048/5609/2950/7098/29969/23328/6504/7189/64581/56940/2047/51339/3476/51562/4317/2213/4055/10114/5187/11235/54910/998/2185/6688/9618/4281/3082/140885/7124
BP	GO:0006275	regulation of DNA replication	106	-0.489092	-2.11648	1.82774e-07	2.70127e-06	1.69779e-06	5238	tags=51%, list=21%, signal=41%	64061/5982/64710/1017/79733/8607/51053/253980/545/1660/3060/10919/54108/54107/80174/86/25792/11124/79913/50485/56897/51659/5518/23560/84296/57695/30968/7270/8317/64785/1763/27154/5515/54962/59343/5983/64863/5985/4798/26271/8914/5984/144455/990/81620/890/10445/63922/29980/3980/29844/146059/641/23244
BP	GO:1903530	regulation of secretion by cell	496	0.276679	1.6276	1.84559e-07	2.72251e-06	1.71114e-06	4751	tags=29%, list=19%, signal=24%	114897/3569/6387/3091/3553/4889/6386/654/7133/7099/5443/51762/11314/8600/301/240/6352/3717/6422/415116/3162/7132/65018/3134/1906/27345/143425/120892/1393/2294/23086/27063/4067/148/7779/2268/5880/7043/23621/6288/5530/4824/27236/5872/90007/5066/640/22999/10972/91543/3596/9367/7097/151/5023/729230/140/185/1080/2149/5724/51124/57586/6622/9525/8723/3565/3593/84106/6558/3783/25924/2213/5289/8832/945/68…
BP	GO:0002920	regulation of humoral immune response	39	0.6295	2.51409	1.88767e-07	2.77934e-06	1.74686e-06	4326	tags=56%, list=17%, signal=47%	1604/2/710/3553/1236/11326/718/922/5788/708/722/2627/354/2213/1378/3263/725/7124/64127/55012/3075/2208
MF	GO:0005518	collagen binding	62	0.528921	2.31134	1.93191e-07	2.83915e-06	1.78445e-06	2855	tags=35%, list=11%, signal=32%	114897/1634/7057/165/960/127435/4060/1520/7373/1842/4092/84168/1292/9902/6678/51144/1508/10491/1513/5118/8754/3675
BP	GO:1905517	macrophage migration	49	0.58029	2.41766	1.96824e-07	2.88712e-06	1.8146e-06	3295	tags=45%, list=13%, signal=39%	6347/975/728/7057/64805/1436/6352/11117/719/1910/6441/59341/6288/6504/255231/928/729230/3958/4920/1240/2185/6348
BP	GO:0042088	T-helper 1 type immune response	43	0.607908	2.4892	2.0187e-07	2.95561e-06	1.85764e-06	3041	tags=44%, list=12%, signal=39%	9173/6363/3553/7099/301/8809/3594/3554/10148/602/6504/7189/729230/64218/84868/3593/6556/51561/3142
BP	GO:0010951	negative regulation of endopeptidase activity	222	0.351509	1.90912	2.02786e-07	2.96348e-06	1.86259e-06	4919	tags=35%, list=20%, signal=29%	9314/5743/2/710/3428/7057/1471/8301/5271/7980/5054/3164/8530/939/5272/5621/960/831/25816/1992/5329/718/56925/9806/7078/5858/10972/358/5176/51232/6694/5918/5267/256394/1410/58189/6622/3476/10653/128488/329/1378/653145/7079/684/1654/7076/5055/199713/10935/2621/6653/5627/720/10406/3082/7124/8434/12/721/6590/643394/112401/409/4018/1285/259/351/2537/4803/10879/6093/3700/1470/64780/51156/866/26998
BP	GO:1901992	positive regulation of mitotic cell cycle phase transition	82	-0.522242	-2.17932	2.09516e-07	3.05613e-06	1.92082e-06	3599	tags=50%, list=14%, signal=43%	7027/8450/80174/163786/5889/51434/23476/56257/51692/55920/23236/134353/27085/286053/993/8317/1019/328/51514/994/995/6868/55835/51433/6491/51529/25942/57504/26271/6241/4193/9700/891/990/81620/29945/113130/6240/1981/11065/8697
BP	GO:1904645	response to amyloid-beta	48	0.576782	2.40177	2.11536e-07	3.07985e-06	1.93573e-06	4861	tags=54%, list=19%, signal=44%	2358/837/2534/7099/5621/4804/3676/10268/23621/774/2213/3383/5641/5663/2915/7124/154/4314/3480/3479/351/4313/781/2309/2697/10333
BP	GO:0006282	regulation of DNA repair	115	-0.471073	-2.05402	2.12694e-07	3.09098e-06	1.94272e-06	5908	tags=47%, list=23%, signal=36%	5111/1054/78990/7158/2140/9025/5893/11284/151987/56154/196528/8607/5932/1161/51366/1660/2187/2138/86/84309/7335/56897/64110/6944/7515/2521/5591/51547/51720/51750/4862/23126/56893/1111/142/63979/29072/83933/24144/10155/1663/672/84501/10635/55929/8914/54799/2305/57634/10902/10721/9400/8295/150275
BP	GO:0045839	negative regulation of mitotic nuclear division	46	-0.618794	-2.30029	2.3106e-07	3.35165e-06	2.10656e-06	2954	tags=43%, list=12%, signal=38%	55055/652/27085/1111/11130/9319/7756/55755/4085/699/26271/7272/891/81620/1063/9212/10403/9735/7517/84861
BP	GO:0042063	gliogenesis	257	0.328715	1.81953	2.39135e-07	3.46237e-06	2.17615e-06	4422	tags=32%, list=18%, signal=27%	6347/2358/1959/3572/3569/728/4609/3398/22933/64805/3949/10319/6279/7852/3553/3084/1436/7133/7099/57142/5604/301/5583/706/1191/3280/23224/4067/4118/3459/6280/2737/5048/2247/6774/3845/10100/712/30812/928/7097/729230/5649/57165/4692/7431/9639/4664/4920/91137/8867/58158/2250/1021/5080/5663/23529/3611/3400/4665/1600/27185/2185/27242/54587/4915/5764/6348/7124/23405/5728/9948/443/7223/147495/351/5309/66…
BP	GO:0014065	phosphatidylinositol 3-kinase signaling	128	0.415569	2.07603	2.43073e-07	3.51289e-06	2.20791e-06	4142	tags=38%, list=16%, signal=31%	5156/1634/22933/56034/7010/3059/653361/6352/3717/3357/1906/26051/6403/118788/10125/677/2268/2247/4824/847/5294/708/10870/5649/11126/23533/2149/80310/5783/113791/4920/2322/5343/2625/940/49860/4915/3082/7124/10507/5728/375033/5293/5286/284/3480/3479/5008
BP	GO:0071559	response to transforming growth factor beta	233	0.342729	1.87293	2.49203e-07	3.59486e-06	2.25942e-06	4468	tags=33%, list=18%, signal=28%	1398/2353/3725/3397/64838/10253/7057/864/2534/678/2022/7123/7472/6386/9719/27122/4091/6422/11117/8483/9839/1906/5138/677/269/8425/83891/27063/4092/7043/2615/2530/25878/9404/6774/116844/7048/5494/56940/80310/54361/2331/7049/2339/3565/65997/10252/5678/3987/57045/4093/26524/94/8754/3675/3694/6688/255743/22938/58495/8692/10370/858/64081/409/56937/93649/1281/90/8576/2908/3480/7525/2200/857/6093/11171/…
BP	GO:0009991	response to extracellular stimulus	432	0.282104	1.63417	2.54021e-07	3.65762e-06	2.29887e-06	4993	tags=31%, list=20%, signal=26%	7538/2353/81631/4780/5743/4982/2/3428/22933/133/3949/7071/558/80149/22856/54407/467/2308/5443/54658/11170/23710/5292/6422/3162/3676/706/3600/1545/8942/10999/51100/120892/11345/1592/5788/595/355/220441/1536/4067/3485/57817/59341/596/590/3920/411/659/8915/29103/847/6915/2350/4149/7048/249/583/9451/199/6716/27141/54361/4330/81788/6344/594/8061/4131/9706/210/6715/6554/6648/5166/5289/9227/5366/5020/11…
BP	GO:1901224	positive regulation of NIK/NF-kappaB signaling	63	0.532361	2.32622	2.56408e-07	3.68522e-06	2.31621e-06	5542	tags=62%, list=22%, signal=48%	6363/4306/942/3553/7099/939/8809/54386/1906/7098/23328/8717/7189/7097/5970/11331/7805/929/9111/84868/3593/4317/3987/3965/114900/3611/149041/51561/1654/7124/64127/351/51284/91662/10913/54106/64922/26585/387
MF	GO:0001540	amyloid-beta binding	80	0.486006	2.23525	2.58811e-07	3.71295e-06	2.33364e-06	5773	tags=50%, list=23%, signal=39%	2358/1471/8301/3949/7099/5621/4804/8685/10288/1191/10268/590/23621/712/4481/972/7097/774/1410/5204/2213/9452/321/83941/2904/3689/2890/6653/3684/154/2892/43/10333/4043/322/9445/4035/323/7042/335
BP	GO:0046633	alpha-beta T cell proliferation	35	0.648395	2.5018	2.602e-07	3.72605e-06	2.34188e-06	2801	tags=57%, list=11%, signal=51%	26191/1604/975/3659/3133/3717/10148/3600/5788/1794/7048/729230/916/3593/7535/57045/6850/3965/51561/940
BP	GO:0006338	chromatin remodeling	159	-0.429845	-1.96069	2.67763e-07	3.82734e-06	2.40554e-06	5373	tags=46%, list=21%, signal=36%	10036/8888/9557/1616/9025/64061/10847/64754/3720/10629/3148/5928/196528/8607/3065/23198/50809/6046/5058/55636/3159/401541/83743/6597/6599/3169/54108/54107/57798/86/257218/79913/4298/23476/9733/6605/6944/4676/11339/9219/64431/9112/23234/10360/6601/6749/8289/29072/6830/1108/53615/3054/3070/6598/8208/57504/4798/9031/55929/4678/22880/22955/10445/6602/57680/55689/4171/11335/55723/8019/29844/55355/11198
BP	GO:0006953	acute-phase response	47	0.584321	2.41552	2.75002e-07	3.92366e-06	2.46608e-06	6662	tags=62%, list=26%, signal=45%	59307/5743/3569/5359/2/9332/3553/8600/54658/1910/57817/6288/325/4153/6291/7124/12/3240/3929/2056/259249/3700/6289/1051/445/5005/5265/9536/50616
BP	GO:0043122	regulation of I-kappaB kinase/NF-kappaB signaling	226	0.343964	1.87793	2.77279e-07	3.94895e-06	2.48197e-06	5351	tags=40%, list=21%, signal=32%	6363/6366/10346/2534/3553/1893/80149/5966/1902/10892/7099/4615/8600/6283/1236/3357/54386/2099/3162/5336/7132/65018/9188/57161/10010/920/834/26057/2950/7098/8915/8717/9100/5494/57153/7189/972/64581/5970/11040/2149/841/84433/85363/329/4055/54469/3965/5187/684/9516/170506/6095/54602/9618/1491/7128/57708/6275/8780/7124/57162/11006/4793/2316/6284/92140/6772/284/64127/388646/6737/8772/8837/24138/23411/…
BP	GO:0044786	cell cycle DNA replication	36	-0.66169	-2.32983	2.80987e-07	3.9945e-06	2.5106e-06	2095	tags=53%, list=8%, signal=48%	51750/8317/64785/5976/4175/1763/4173/54962/59343/26271/4172/3978/144455/2237/81620/4171/5422/29980/641
BP	GO:0043551	regulation of phosphatidylinositol 3-kinase activity	50	0.55497	2.31299	2.8349e-07	4.02278e-06	2.52838e-06	3009	tags=42%, list=12%, signal=37%	9021/2358/6363/5156/6366/8835/64805/7010/1236/4067/2268/84174/2247/8651/23533/113791/2322/5343/9306/998/2185
BP	GO:2000116	regulation of cysteine-type endopeptidase activity	205	0.357306	1.92345	2.84077e-07	4.02382e-06	2.52903e-06	3383	tags=29%, list=13%, signal=26%	9314/5743/4609/3428/7057/2534/6279/3164/8530/10892/114548/939/5272/960/4804/3717/831/25816/5329/10550/83595/2934/355/6280/834/2152/4824/8915/8738/358/83874/64581/5023/64065/9451/2149/7805/1410/489/27141/6622/3476/444/841/9447/329/5641/6850/3965/5366/6505/1654/55081/2904/4255/10935/2621/3082/7124/26999
CC	GO:0005813	centrosome	484	-0.328596	-1.68326	2.86897e-07	4.05644e-06	2.54953e-06	6414	tags=37%, list=25%, signal=28%	7016/3297/6249/219844/79444/51199/30848/10856/10046/10694/256987/56852/56062/8733/150280/57560/26005/5111/51143/1778/3796/5977/403/117178/2733/5576/5930/1453/84516/7486/6683/8655/2140/5902/23363/85417/219736/10300/23332/10899/5566/84084/4190/54806/1869/151987/1017/59349/7516/9001/6201/51715/9371/9742/1660/6566/3834/6919/9820/2932/80254/114327/285025/285331/163786/57534/9024/10844/9786/5076/2010/7…
BP	GO:1904994	regulation of leukocyte adhesion to vascular endothelial cell	28	0.68765	2.51644	2.90939e-07	4.10617e-06	2.58079e-06	3323	tags=64%, list=13%, signal=56%	9314/6366/3569/6387/10164/240/6401/3676/6403/2113/340481/7189/729230/5970/5724/2529/3689/7124
BP	GO:0043414	macromolecule methylation	224	-0.39419	-1.87815	2.91824e-07	4.11126e-06	2.58399e-06	4706	tags=42%, list=19%, signal=34%	5929/55170/63899/51409/57570/63892/55124/79872/10322/23067/359787/2641/56254/346171/64754/3720/9463/56154/2091/80745/9836/55621/11137/144233/26147/8473/10919/59336/55677/4801/117246/55798/26053/56341/23476/55251/10196/56257/11022/9219/10419/6628/79813/51547/80204/11105/63925/4802/6634/29890/23168/54880/64324/8731/142/1387/29104/29072/4221/6830/10155/1786/53615/64863/3054/672/79922/127253/3070/659…
MF	GO:0017116	single-stranded DNA helicase activity	20	-0.774173	-2.37666	3.05889e-07	4.30167e-06	2.70366e-06	1782	tags=80%, list=7%, signal=74%	1660/56897/4175/1763/4173/4176/5983/84515/5985/5984/4172/4174/63922/4171/10721/80119
BP	GO:0002532	production of molecular mediator involved in inflammatory response	73	0.502388	2.26619	3.18045e-07	4.46459e-06	2.80606e-06	5196	tags=52%, list=21%, signal=41%	3569/695/3091/63940/80149/5054/653361/7099/4615/240/7850/241/7001/4067/6774/115362/64581/5023/923/8723/8773/5678/6850/5187/199713/140885/7124/11006/64127/122618/6845/3929/64170/148022/10333/23765/3566/23646
BP	GO:0002437	inflammatory response to antigenic stimulus	62	0.522328	2.28252	3.40219e-07	4.75881e-06	2.99098e-06	4340	tags=47%, list=17%, signal=39%	975/2/695/2534/3133/4889/1236/718/10125/4067/2268/923/10800/3557/3593/2213/2625/6850/3568/3055/64806/940/2529/7124/968/64127/7525/2209/79651
BP	GO:0045860	positive regulation of protein kinase activity	352	0.302187	1.72458	3.39867e-07	4.75881e-06	2.99098e-06	4502	tags=34%, list=18%, signal=28%	1958/6363/6366/7164/10253/942/353514/7057/56034/8826/3553/4908/9770/3084/1436/653361/10892/7099/11314/5621/5604/8600/6283/6352/3717/1236/3357/65018/1906/1191/10125/120892/1839/7039/55507/5788/595/148/920/1116/5311/659/5609/2247/7098/4739/5294/23328/8651/3937/7048/7189/151/5649/11331/23533/80310/894/2013/6622/3565/81617/5606/959/4920/3593/2322/8115/896/1027/8325/7520/5663/285489/6850/6505/376497/6…
BP	GO:0034112	positive regulation of homotypic cell-cell adhesion	14	0.83373	2.43783	3.48039e-07	4.85097e-06	3.0489e-06	621	tags=64%, list=2%, signal=63%	3572/3569/3716/22915/8600/6352/3717/288/5329
BP	GO:0070664	negative regulation of leukocyte proliferation	82	0.482872	2.22465	3.48046e-07	4.85097e-06	3.0489e-06	4115	tags=44%, list=16%, signal=37%	942/695/11314/5621/90865/11326/10288/339390/6441/4067/3635/7940/2615/2950/23495/7305/640/79679/84868/80380/2213/1378/57045/4332/3965/149041/1493/27242/7128/57162/11006/56253/472/868/8379/941
BP	GO:0002507	tolerance induction	27	0.694603	2.51361	3.49678e-07	4.86506e-06	3.05777e-06	3928	tags=63%, list=16%, signal=53%	11213/3133/10288/3106/4067/7048/640/916/84868/29851/5678/1178/3965/1233/7128/11006/868
BP	GO:0010543	regulation of platelet activation	42	0.600233	2.43741	3.52642e-07	4.88161e-06	3.06816e-06	2852	tags=45%, list=11%, signal=40%	114897/3572/5156/7056/3569/5588/22915/7099/3717/6403/4067/4846/640/2207/928/7294/5341/6850/18
BP	GO:0032615	interleukin-12 production	59	0.552462	2.4148	3.52737e-07	4.88161e-06	3.06816e-06	4330	tags=54%, list=17%, signal=45%	6363/11213/353514/3659/7057/7099/1236/5336/3106/7098/6504/708/51311/7189/7097/64581/5970/7805/3603/959/3593/961/3394/6850/1240/3965/51561/4790/409/64127/4050/3458
BP	GO:0032655	regulation of interleukin-12 production	59	0.552462	2.4148	3.52737e-07	4.88161e-06	3.06816e-06	4330	tags=54%, list=17%, signal=45%	6363/11213/353514/3659/7057/7099/1236/5336/3106/7098/6504/708/51311/7189/7097/64581/5970/7805/3603/959/3593/961/3394/6850/1240/3965/51561/4790/409/64127/4050/3458
BP	GO:0010952	positive regulation of peptidase activity	169	0.379607	1.97136	3.57742e-07	4.94214e-06	3.10621e-06	2875	tags=28%, list=11%, signal=25%	4609/3428/8301/2534/6279/10892/114548/4804/3717/65018/10550/83595/2934/355/4067/10010/6280/834/84168/2152/4824/8915/6774/8738/83874/64581/5023/64065/9451/2149/7805/489/27141/6622/444/841/9447/10845/1378/5641/6850/3965/5366/6505/5118/1654/55081/2904
BP	GO:0006939	smooth muscle contraction	101	0.439533	2.11627	3.59736e-07	4.96094e-06	3.11802e-06	5644	tags=42%, list=22%, signal=32%	5743/3357/1906/1910/148/5997/340481/6915/3778/5910/60675/151/5023/55959/2149/5724/80852/4638/5020/9732/6546/18/796/255743/154/952/5286/93649/150/9312/1813/6647/857/6093/4629/6909/2668/6869/322/3363/387/323
BP	GO:1902100	negative regulation of metaphase/anaphase transition of cell cycle	40	-0.621749	-2.23468	3.76432e-07	5.18206e-06	3.257e-06	1553	tags=40%, list=6%, signal=38%	11130/9319/7756/55755/4085/699/26271/7272/891/81620/1063/9212/10403/9735/7517/84861
BP	GO:0016054	organic acid catabolic process	218	0.347524	1.87348	3.85304e-07	5.29489e-06	3.32792e-06	7450	tags=49%, list=30%, signal=35%	23417/51166/2639/55862/8942/10999/6999/1592/8529/33/84693/64577/4846/549/10449/1666/3155/51380/5095/60496/6342/594/6898/10157/1738/160428/197257/2653/1376/2108/3242/1962/54363/54905/38/8564/8310/593/2110/18/37/3712/4329/132789/83752/6470/51268/64087/5105/2954/6718/80896/55577/5446/51/3176/51390/443/54511/30/64902/26275/5009/55289/2184/34/2875/390916/137872/10841/3033/27034/27165/144193/1579/8647/…
BP	GO:0006721	terpenoid metabolic process	92	0.454196	2.13639	3.89449e-07	5.34248e-06	3.35783e-06	5591	tags=49%, list=22%, signal=38%	1544/1571/54658/220/1576/1545/125/1592/128/126/54884/127/5959/64577/1562/1559/54577/130/6715/9227/5947/124/8228/1543/54905/1558/5949/10170/1551/224/8608/54659/57104/54600/1565/57665/51635/55825/1577/29785/145226/151056/5950/4035/317749
BP	GO:0002468	dendritic cell antigen processing and presentation	15	0.81797	2.45999	3.91206e-07	5.3572e-06	3.36708e-06	3841	tags=87%, list=15%, signal=73%	6363/6366/7057/10875/1236/3125/972/3122/50856/2213/6556/968/64127
BP	GO:0002448	mast cell mediated immunity	49	0.571903	2.38272	4.02024e-07	5.49573e-06	3.45415e-06	5012	tags=55%, list=20%, signal=44%	695/5730/11314/5272/3162/10125/2294/4067/2268/5880/5294/640/3596/8723/3565/8773/8832/6850/3965/3598/201294/6284/5293/6845/5729/7462/3566
BP	GO:0031570	DNA integrity checkpoint signaling	103	-0.47927	-2.06494	4.05382e-07	5.53198e-06	3.47693e-06	5532	tags=47%, list=22%, signal=37%	83990/7158/5810/11073/9575/80198/1869/79968/1017/135458/545/80254/25896/27339/55159/9344/11200/5591/1112/60561/9656/146956/51720/29935/51343/2177/4436/51514/1111/5514/1763/5883/54962/835/56658/672/4193/8914/80279/84126/990/81620/57551/29980/8563/51512/641/9984
BP	GO:0044283	small molecule biosynthetic process	494	0.268421	1.57759	4.25455e-07	5.79581e-06	3.64275e-06	5773	tags=36%, list=23%, signal=28%	1958/5743/4837/1544/133/3553/51302/1621/23417/5322/2687/5730/654/467/2308/1571/5805/114876/6916/4056/301/240/27122/220/27010/353/5336/1576/1906/132/241/8942/653/2643/51141/33/64577/2950/2247/5903/5360/8803/5740/5236/55276/26002/972/284541/10449/23038/5031/1806/27232/1559/6296/55301/1080/6716/5724/8720/60481/6622/54361/3155/51380/60496/6342/283985/10157/51144/5341/9104/10558/5166/5947/10728/2628/8…
BP	GO:0030101	natural killer cell activation	83	0.484093	2.25131	4.44754e-07	6.04819e-06	3.80138e-06	7263	tags=63%, list=29%, signal=45%	26191/558/3133/639/8809/3717/3134/3600/10125/5788/2268/914/6504/7305/3601/4783/3560/11151/57823/84868/841/3593/51561/201294/2621/79465/4818/5873/5293/3456/6845/50615/257101/100507436/3822/148022/5087/10464/6670/56832/285282/51744/3451/9760/9437/259197/3442/3445/80329/3467/164/2000
BP	GO:0006406	mRNA export from nucleus	52	-0.582057	-2.2208	4.48511e-07	6.08871e-06	3.82685e-06	3783	tags=44%, list=15%, signal=38%	55677/9887/84271/4686/57187/5433/29890/55746/5976/23381/29072/6830/26993/8480/57122/79228/79902/8021/8563/9631/8106/26019/9984
BP	GO:0010518	positive regulation of phospholipase activity	51	0.57049	2.39059	4.50226e-07	6.10142e-06	3.83483e-06	3201	tags=49%, list=13%, signal=43%	5156/942/10672/728/64805/3702/5322/1902/6401/6352/3357/2099/148/2247/5031/185/11331/7294/5724/9373/2769/27/5741/3208/5330
BP	GO:0022616	DNA strand elongation	30	-0.679144	-2.26489	4.56718e-07	6.1787e-06	3.88341e-06	6560	tags=80%, list=26%, signal=59%	93973/10856/51377/5111/64710/8607/54107/86/79913/10714/5426/1763/4173/4176/5983/10111/4798/5984/4172/3978/10445/5422/3980/29844
BP	GO:0090329	regulation of DNA-templated DNA replication	43	-0.61405	-2.24406	4.65735e-07	6.28983e-06	3.95325e-06	5118	tags=63%, list=20%, signal=50%	5982/1017/79733/51053/80174/25792/50485/56897/51659/84296/30968/8317/64785/54962/59343/5983/64863/5985/26271/8914/5984/144455/81620/63922/29980/3980/641
BP	GO:0062197	cellular response to chemical stress	295	0.311316	1.74698	4.6839e-07	6.3148e-06	3.96895e-06	3410	tags=25%, list=14%, signal=22%	4170/2353/4780/5743/3725/388/5156/3569/4609/695/22933/3091/8575/10365/2534/558/80149/4482/653361/7099/2308/2395/10516/135112/301/240/3717/3162/65018/706/1906/1545/677/10550/120892/7001/2643/355/59341/596/5311/80303/2530/4846/847/358/5970/2034/9451/5151/199/80310/8382/6622/6648/7520/8321/4638/6505/26287/6649/1654/11235/4255/9973/10935/7128/29957/3082/140885/7124/50640/9474
BP	GO:0050869	negative regulation of B cell activation	34	0.640989	2.4653	4.72389e-07	6.35778e-06	3.99596e-06	3506	tags=62%, list=14%, signal=53%	64092/3398/695/11314/6422/55024/4067/374403/3635/23495/7305/640/7805/2213/1378/4332/149041/1493/27242/7128/472
CC	GO:0042101	T cell receptor complex	13	0.839645	2.39905	4.92468e-07	6.61665e-06	4.15866e-06	2530	tags=77%, list=10%, signal=69%	925/915/8631/920/50852/919/917/916/7535/6850
BP	GO:0007094	mitotic spindle assembly checkpoint signaling	36	-0.654099	-2.3031	5.38932e-07	7.20242e-06	4.52683e-06	1553	tags=42%, list=6%, signal=39%	11130/9319/7756/55755/4085/699/7272/891/81620/1063/9212/10403/9735/7517/84861
BP	GO:0071173	spindle assembly checkpoint signaling	36	-0.654099	-2.3031	5.38932e-07	7.20242e-06	4.52683e-06	1553	tags=42%, list=6%, signal=39%	11130/9319/7756/55755/4085/699/7272/891/81620/1063/9212/10403/9735/7517/84861
BP	GO:0071174	mitotic spindle checkpoint signaling	36	-0.654099	-2.3031	5.38932e-07	7.20242e-06	4.52683e-06	1553	tags=42%, list=6%, signal=39%	11130/9319/7756/55755/4085/699/7272/891/81620/1063/9212/10403/9735/7517/84861
BP	GO:0071824	protein-DNA complex subunit organization	142	-0.436314	-1.96798	5.39744e-07	7.20242e-06	4.52683e-06	5373	tags=46%, list=21%, signal=37%	1616/9025/64061/10847/5893/64754/55832/10629/3148/196528/51053/23198/50809/6046/6877/26054/3159/401541/83743/6597/6599/2960/138474/54108/54107/257218/55814/5889/6908/9733/6605/2491/6944/4676/11339/64431/11144/23234/23126/6601/6884/6749/8289/29072/6830/1058/6872/55290/2972/3070/6598/8208/55929/4678/1062/81620/64105/1063/6602/4171/9735/6874/55723/55355/11198/7343
BP	GO:0048872	homeostasis of number of cells	251	0.33076	1.8201	5.70633e-07	7.60165e-06	4.77775e-06	4747	tags=36%, list=19%, signal=29%	7538/132299/3569/5142/3398/3091/567/10365/3575/10673/558/9770/3059/92/6372/301/6194/1831/3717/1236/3162/2113/677/7001/608/355/4067/139818/57817/596/3635/30061/211/8915/1777/4846/23495/6774/3845/11167/10320/972/729230/2034/80177/11151/9935/2149/51309/7049/159296/84433/2322/51705/1021/5925/5320/2625/3965/5366/55619/7544/149041/5741/1233/6688/7128/8861/3707/10370/6772/3574/5293/55012/5926/5532/3071/…
BP	GO:0002823	negative regulation of adaptive immune response based on somatic recombination of immune receptors built from immunoglobulin superfamily domains	53	0.555803	2.37217	5.72206e-07	7.60966e-06	4.78279e-06	4072	tags=45%, list=16%, signal=38%	9173/1604/3575/80149/3134/5788/339390/4092/3821/6504/56940/3824/722/3565/84868/2213/1378/149041/725/11006/64127/3456/5532/3071
BP	GO:1902275	regulation of chromatin organization	34	-0.66362	-2.28333	5.9486e-07	7.89753e-06	4.96371e-06	2362	tags=44%, list=9%, signal=40%	80063/51535/134353/6749/3192/10155/1786/64863/25942/54784/22880/4288/90378/9869/9739
BP	GO:0051985	negative regulation of chromosome segregation	42	-0.624572	-2.26585	6.08102e-07	8.04605e-06	5.05707e-06	1553	tags=40%, list=6%, signal=38%	11130/9319/7756/55755/4085/699/9232/26271/7272/891/81620/1063/9212/10403/9735/7517/84861
BP	GO:1905819	negative regulation of chromosome separation	42	-0.624572	-2.26585	6.08102e-07	8.04605e-06	5.05707e-06	1553	tags=40%, list=6%, signal=38%	11130/9319/7756/55755/4085/699/9232/26271/7272/891/81620/1063/9212/10403/9735/7517/84861
BP	GO:1901343	negative regulation of vasculature development	87	0.465047	2.19584	6.15977e-07	8.1365e-06	5.11391e-06	5723	tags=44%, list=23%, signal=34%	9314/9510/1634/1969/10253/7057/10365/7010/5054/2658/240/11117/2296/729230/5176/11126/6678/54361/64218/354/6558/7075/5140/57556/7124/23166/7058/6772/1285/6093/4881/3627/5196/1647/350/7042/356/5797
BP	GO:1902895	positive regulation of miRNA transcription	43	0.588969	2.41165	6.46344e-07	8.52325e-06	5.35699e-06	3323	tags=44%, list=13%, signal=38%	9314/2353/1958/3725/4609/3091/4804/4091/84913/2113/2247/6774/7490/5970/8061/2625/7376/6688/7124
MF	GO:0017056	structural constituent of nuclear pore	21	-0.755204	-2.33902	6.50599e-07	8.56495e-06	5.3832e-06	1861	tags=57%, list=7%, signal=53%	55746/54830/65110/9972/65109/23511/23165/9883/57122/79902/8021/9631
BP	GO:0030261	chromosome condensation	31	-0.673846	-2.25979	6.58809e-07	8.65847e-06	5.44198e-06	2693	tags=45%, list=11%, signal=40%	23310/58531/9918/54892/9031/10051/10592/26993/22985/113130/64151/51203/29781/7153
MF	GO:0003697	single-stranded DNA binding	97	-0.490965	-2.10448	6.67663e-07	8.76014e-06	5.50588e-06	6398	tags=52%, list=25%, signal=39%	3297/3508/5813/56852/11277/3178/3329/9361/4292/5893/5395/64710/55247/7247/3148/5932/1660/5814/50485/8438/11144/54840/7156/4437/29935/23168/4175/4436/63901/4173/3192/5437/1663/4176/55388/10111/10635/84515/9401/8880/10051/4172/10592/5094/4174/4171/5422/10128/57109/641
MF	GO:0140101	catalytic activity, acting on a tRNA	84	-0.506629	-2.1192	6.70671e-07	8.78489e-06	5.52144e-06	6497	tags=50%, list=26%, signal=37%	80222/55520/79042/63899/10667/57570/83707/57038/54802/10248/56931/51651/11062/2193/10940/80745/9836/55621/10799/144233/54938/55798/54901/10056/85495/285605/55278/79897/23395/80746/124454/64118/55157/127253/51367/10785/57176/80324/6894/23438/55687/80755
BP	GO:0043300	regulation of leukocyte degranulation	48	0.561576	2.33845	6.87475e-07	8.98996e-06	5.65033e-06	5078	tags=58%, list=20%, signal=47%	11314/3162/3134/2294/4067/2268/5880/640/3596/729230/5724/8723/3565/84106/2213/8832/6850/3965/3598/201294/3689/6688/3684/6845/3071/3822/3566/634
BP	GO:2000181	negative regulation of blood vessel morphogenesis	86	0.465745	2.19475	6.99568e-07	9.13286e-06	5.74014e-06	5723	tags=44%, list=23%, signal=34%	9314/9510/1634/1969/10253/7057/10365/7010/5054/2658/240/11117/2296/729230/5176/11126/6678/54361/64218/354/6558/7075/5140/57556/7124/23166/7058/6772/1285/6093/4881/3627/5196/1647/350/7042/356/5797
BP	GO:0032945	negative regulation of mononuclear cell proliferation	76	0.479532	2.1902	7.20745e-07	9.39367e-06	5.90407e-06	4115	tags=43%, list=16%, signal=36%	942/695/11314/5621/11326/10288/339390/6441/4067/3635/7940/2615/23495/7305/640/79679/84868/80380/2213/1378/57045/4332/3965/149041/1493/27242/57162/11006/56253/472/868/8379/941
BP	GO:0051310	metaphase plate congression	55	-0.565269	-2.1769	7.22809e-07	9.40492e-06	5.91113e-06	2200	tags=42%, list=9%, signal=38%	81930/3837/150465/10726/27436/55166/3192/9928/11004/10615/83540/81610/1062/891/81620/113130/1063/9212/10403/3619/55143/3833/8697
CC	GO:0098636	protein complex involved in cell adhesion	43	0.5867	2.40236	7.3091e-07	9.49455e-06	5.96747e-06	4604	tags=47%, list=18%, signal=38%	22915/11117/5329/3676/3680/4067/10077/9358/3695/940/3675/3681/1493/3694/3689/58494/3684/941/83700/3682
BP	GO:0051346	negative regulation of hydrolase activity	315	0.308762	1.75	7.5154e-07	9.74638e-06	6.12575e-06	4976	tags=33%, list=20%, signal=27%	9314/5743/23645/10253/2/710/3428/7057/1471/8301/5271/1893/7980/5054/3164/8530/939/5272/5621/960/301/831/25816/1992/5329/718/56925/9806/7078/10999/120892/5997/3001/5858/4846/10972/358/5176/51232/6694/5918/5267/256394/1410/325/58189/6622/3958/3476/10653/128488/10252/1508/9104/329/1378/653145/7079/684/1654/7076/5055/199713/6059/10935/2621/6653/5627/720/10406/3082/7124/8434/123016/10507/12/9734/721/6…
MF	GO:0019787	ubiquitin-like protein transferase activity	389	-0.337451	-1.69495	7.81419e-07	1.01171e-05	6.35876e-06	4351	tags=30%, list=17%, signal=25%	253980/1161/26190/9903/90293/51366/391714/7267/7681/117584/10293/55743/83737/54542/147339/80829/93611/148066/10107/57534/8945/378884/257218/84246/143279/8925/27339/90933/65264/23608/9616/81786/23291/55159/84231/149603/727800/8535/9690/10193/84133/26262/7737/54476/51239/29128/80204/7322/89910/26263/23295/9666/286053/23609/22954/80196/10616/7329/4591/64777/54880/7332/4734/153769/7706/7337/6015/5151…
CC	GO:0000123	histone acetyltransferase complex	57	-0.564158	-2.19333	7.94714e-07	1.02385e-05	6.43504e-06	4740	tags=47%, list=19%, signal=39%	9678/10629/8607/6877/6885/8473/51616/54107/86/4298/26009/6944/7862/8464/1387/27154/3054/55929/54799/57634/10902/10445/55689/6874/11091/8295/56970
CC	GO:0031248	protein acetyltransferase complex	57	-0.564158	-2.19333	7.94714e-07	1.02385e-05	6.43504e-06	4740	tags=47%, list=19%, signal=39%	9678/10629/8607/6877/6885/8473/51616/54107/86/4298/26009/6944/7862/8464/1387/27154/3054/55929/54799/57634/10902/10445/55689/6874/11091/8295/56970
CC	GO:1902493	acetyltransferase complex	57	-0.564158	-2.19333	7.94714e-07	1.02385e-05	6.43504e-06	4740	tags=47%, list=19%, signal=39%	9678/10629/8607/6877/6885/8473/51616/54107/86/4298/26009/6944/7862/8464/1387/27154/3054/55929/54799/57634/10902/10445/55689/6874/11091/8295/56970
BP	GO:0001523	retinoid metabolic process	79	0.478686	2.19893	8.03233e-07	1.03312e-05	6.49334e-06	5591	tags=51%, list=22%, signal=40%	1544/54658/220/1576/1545/125/1592/128/126/54884/127/5959/64577/1562/54577/130/9227/5947/124/8228/1543/54905/1558/5949/10170/1551/8608/54659/57104/54600/1565/57665/51635/1577/29785/145226/151056/5950/4035/317749
BP	GO:0046688	response to copper ion	35	0.628936	2.42671	8.10856e-07	1.04122e-05	6.54421e-06	2724	tags=51%, list=11%, signal=46%	4780/4499/4502/4493/4494/4501/4489/5621/3931/23621/4495/5066/358/4496/6622/1543/6652/6649
BP	GO:0019369	arachidonic acid metabolic process	55	0.531191	2.27471	8.31082e-07	1.06544e-05	6.69647e-06	4949	tags=51%, list=20%, signal=41%	5743/1544/5730/1571/6916/240/1545/8529/158584/5740/1562/113612/284541/1559/1555/1549/10728/1543/1558/1548/5742/50640/1573/1565/11343/57406/242/29785
BP	GO:0043370	regulation of CD4-positive, alpha-beta T cell differentiation	49	0.563583	2.34806	8.33874e-07	1.06728e-05	6.708e-06	4330	tags=53%, list=17%, signal=44%	6363/942/864/80149/10892/114548/301/3662/3594/4092/64332/8651/3565/3122/3593/2625/9308/3965/149041/51561/84807/3142/865/3071/941/3458
BP	GO:0046637	regulation of alpha-beta T cell differentiation	65	0.512584	2.25216	8.4103e-07	1.07468e-05	6.75452e-06	4330	tags=52%, list=17%, signal=43%	6363/942/864/80149/639/10892/114548/301/3662/3594/2737/4092/64332/8651/7048/3565/3122/3593/7535/2625/9308/6850/3965/149041/51561/84807/3142/865/11006/3707/257101/3071/941/3458
BP	GO:1902749	regulation of cell cycle G2/M phase transition	85	-0.502453	-2.10025	8.42719e-07	1.07508e-05	6.75707e-06	3060	tags=40%, list=12%, signal=35%	5889/23476/9344/55920/1112/60561/51720/993/8317/51343/1019/51514/1111/994/995/65123/9928/56658/672/25942/57504/26271/80279/891/990/1063/9212/57551/6240/29980/84936/641/6790/22976
BP	GO:0010950	positive regulation of endopeptidase activity	152	0.379197	1.95703	8.44837e-07	1.07603e-05	6.76304e-06	2875	tags=28%, list=11%, signal=25%	4609/3428/8301/2534/6279/10892/114548/4804/3717/10550/83595/2934/355/4067/6280/834/2152/4824/8915/6774/8738/83874/64581/5023/64065/9451/2149/7805/489/27141/6622/444/841/9447/1378/5641/6850/3965/5366/6505/1654/55081/2904
BP	GO:0000086	G2/M transition of mitotic cell cycle	116	-0.458549	-2.00168	8.59201e-07	1.09255e-05	6.86686e-06	3060	tags=41%, list=12%, signal=37%	135458/219771/55743/80174/9024/5889/23476/9344/55920/11200/1112/60561/84930/51720/23236/9088/993/8317/51343/1019/51514/1111/994/995/65123/9928/56658/672/25942/57504/26271/9833/80279/51400/2305/891/990/890/6502/1063/9212/57551/6240/29980/84936/808/641/6790
BP	GO:0043409	negative regulation of MAPK cascade	156	0.36955	1.89955	8.82374e-07	1.1202e-05	7.04063e-06	4788	tags=36%, list=19%, signal=29%	26191/10253/11213/9611/4609/3553/467/7099/2308/1844/11314/245928/1540/6422/11117/65018/7078/2633/1848/5788/4067/374403/5997/80824/54900/5048/2950/57447/8661/1847/6609/51339/3476/55584/10252/27330/10114/5187/59272/57556/6653/140885/11006/284996/152559/8692/5728/3480/259/1846/3976/857/51347/54206/10019/91662
BP	GO:0003018	vascular process in circulatory system	247	0.329051	1.81347	8.96367e-07	1.13612e-05	7.1407e-06	4490	tags=32%, list=18%, signal=26%	5743/6515/133/10365/7010/1621/654/54407/6916/3357/10060/1906/1910/27345/10999/92745/5138/6580/2643/148/5997/6523/59341/2296/659/340481/147/9353/4846/3764/6915/3778/5910/151/5023/185/10800/4883/2149/489/9590/57419/80852/6558/6648/1889/6567/6505/8671/9732/376497/6649/6546/59272/796/6456/7124/9474/6506/2729/154/23428/952/5286/284/10396/150/81539/3741/7525/84889/6647/857/28232/6093/342527/4313/4881
BP	GO:0042178	xenobiotic catabolic process	24	0.711462	2.50469	9.23056e-07	1.16806e-05	7.34143e-06	4917	tags=75%, list=20%, signal=60%	1544/54658/1576/9446/2329/2947/1559/1555/1543/1558/1548/2180/1429/5446/1565/30/55270/1577
BP	GO:0001676	long-chain fatty acid metabolic process	106	0.425802	2.06263	9.53715e-07	1.20297e-05	7.56085e-06	5068	tags=43%, list=20%, signal=35%	5743/1544/5730/1571/6916/4056/240/1576/1545/641371/10999/8529/33/158584/2950/5740/5066/1562/113612/284541/1559/1555/60481/6342/51703/1549/1376/10728/1543/376497/1558/1548/2180/5742/50640/1573/51390/1565/11343/30/57406/10998/242/29785/28965/116285
BP	GO:0031960	response to corticosteroid	150	0.377935	1.94463	9.5365e-07	1.20297e-05	7.56085e-06	4982	tags=41%, list=20%, signal=33%	7538/2354/2353/5743/3569/2/133/678/2022/654/54658/301/11170/3717/1906/1545/3931/677/595/1536/3485/596/590/3490/5069/9353/5066/306/358/249/5176/199/5724/3557/594/8061/6898/210/2322/6715/10888/5020/8754/687/4129/7124/5105/5327/90/2908/3480/2720/2056/2690/11063/8837/2309/54206/178/10076/1535
BP	GO:0008033	tRNA processing	95	-0.489253	-2.0888	9.69556e-07	1.22099e-05	7.67408e-06	6399	tags=49%, list=25%, signal=37%	55520/79042/26610/63899/10667/57570/63892/83707/54802/10248/51728/56931/55140/11062/10940/80745/9836/55621/10799/144233/55798/54901/1653/85495/126789/285605/27304/8270/51654/79897/55226/80746/54522/54517/64118/127253/51367/10785/84267/283989/80324/11180/6894/55687/26024/84705/81605
BP	GO:0048017	inositol lipid-mediated signaling	161	0.372169	1.91819	9.79554e-07	1.2316e-05	7.74077e-06	4142	tags=34%, list=16%, signal=29%	5156/1634/22933/56034/7010/3059/1436/653361/6352/3717/3357/1906/26051/6403/118788/10125/677/5334/2268/2247/4824/847/5294/708/10870/5649/4883/11126/23533/2149/80310/5724/5783/113791/4920/2322/5343/5289/2625/9651/940/49860/4915/5330/3082/7124/10507/5728/375033/5293/5286/284/3480/3479/5008
BP	GO:0001776	leukocyte homeostasis	84	0.464106	2.16335	9.92928e-07	1.24641e-05	7.83388e-06	4453	tags=43%, list=18%, signal=35%	3569/5142/3091/10673/558/6372/301/6194/1831/608/355/4067/139818/596/30061/8915/23495/972/729230/11151/159296/2322/3965/5366/55619/149041/7128/3707/5293/55012/5532/3071/83700/4352/8772/11035
BP	GO:2001056	positive regulation of cysteine-type endopeptidase activity	128	0.401668	2.00658	1.01667e-06	1.27418e-05	8.0084e-06	2875	tags=30%, list=11%, signal=27%	4609/3428/2534/6279/10892/114548/4804/3717/10550/83595/2934/355/6280/834/2152/4824/8915/8738/83874/64581/5023/64065/9451/2149/7805/489/27141/6622/444/841/9447/5641/6850/3965/5366/6505/1654/55081/2904
BP	GO:0043123	positive regulation of I-kappaB kinase/NF-kappaB signaling	173	0.364411	1.91298	1.03452e-06	1.29447e-05	8.13594e-06	5726	tags=44%, list=23%, signal=34%	6363/6366/10346/2534/3553/1893/5966/1902/10892/7099/4615/8600/6283/1236/3357/54386/3162/7132/65018/9188/57161/920/834/26057/7098/8915/8717/5494/57153/7189/972/64581/5970/11040/2149/841/84433/85363/329/4055/3965/684/9516/170506/54602/1491/57708/6275/7124/57162/2316/6284/92140/64127/6737/8772/8837/24138/2697/64170/148022/10333/3551/7105/222643/9218/55223/1936/843/10913/54106/56674/51026/387/356/4057
BP	GO:0046209	nitric oxide metabolic process	68	0.5001	2.23071	1.04941e-06	1.31101e-05	8.23988e-06	3323	tags=38%, list=13%, signal=33%	9314/5743/10365/3553/80149/7099/3717/706/1906/1545/1191/2643/5311/4846/5740/7097/64581/199/4317/9104/6648/961/6095/2185/140885/7124
BP	GO:0000302	response to reactive oxygen species	176	0.368712	1.93439	1.0549e-06	1.31577e-05	8.26984e-06	4555	tags=35%, list=18%, signal=29%	1398/2353/4780/3725/388/5156/3569/5516/695/3091/10365/2534/558/653361/2395/10516/1571/301/10628/3162/65018/1906/1545/824/120892/7001/2643/596/5311/2950/4846/847/358/5970/5151/80310/1410/8061/6648/6649/8754/6546/11235/2185/9978/9973/10935/7128/3082/140885/8692/6772/1263/3240/3741/5599/6647/55270/11035/4313/2309
BP	GO:0009620	response to fungus	59	0.540364	2.36192	1.06674e-06	1.32649e-05	8.33718e-06	3410	tags=39%, list=14%, signal=34%	1398/695/81030/6279/5322/10892/7099/4615/6283/245928/5336/57817/6280/8915/23406/64581/1667/1668/50856/6850/64806/6688/9474
BP	GO:0018205	peptidyl-lysine modification	306	-0.35164	-1.73389	1.06688e-06	1.32649e-05	8.33718e-06	4651	tags=30%, list=18%, signal=25%	10629/5563/9426/8607/538/6877/26054/11137/391257/1487/26147/6885/8473/10919/55677/138474/54107/2138/4801/86/26053/6804/4298/23476/80764/26009/8535/6944/7862/8464/28999/7737/79813/51547/11105/23409/26276/63925/4802/6612/286053/7329/23168/5905/54880/64324/1111/1387/29104/29072/27154/4221/6830/83933/26036/8985/10401/10155/1786/6872/59343/53615/3054/672/6598/25942/57609/4800/4193/55929/51588/54799/57…
BP	GO:0007127	meiosis I	94	-0.489582	-2.08679	1.1205e-06	1.39095e-05	8.74233e-06	6041	tags=48%, list=24%, signal=37%	143471/164045/55124/5885/83990/4438/4292/80198/56154/1761/317761/391714/27030/10919/84690/5889/8438/84057/1164/11144/51547/11105/146956/11077/25788/29893/2177/116138/7589/994/29988/9319/10111/10635/9232/26271/9700/898/10403/9133/80010/9134/7153/6790/4439
BP	GO:0001659	temperature homeostasis	170	0.367164	1.91409	1.12735e-06	1.39724e-05	8.78185e-06	2958	tags=27%, list=12%, signal=24%	1958/5743/3397/56034/51316/7852/3553/1621/79054/7099/2308/8600/3662/8809/3717/25979/3600/1910/2104/5334/10400/33/4858/6774/58488/249/3596/729230/2034/4883/57561/1666/3565/50486/283455/1376/5925/2628/6850/1240/5020/376497/116/18/7376/37
BP	GO:0016571	histone methylation	117	-0.456514	-1.99607	1.19376e-06	1.47721e-05	9.28451e-06	3971	tags=42%, list=16%, signal=35%	10322/23067/2641/56254/64754/3720/2091/11137/26147/8473/10919/59336/55677/4801/26053/56341/23476/10419/79813/51547/11105/63925/4802/23168/54880/64324/1387/29104/29072/4221/6830/1786/3054/672/6598/4800/65094/90780/10445/6839/30827/1789/2146/11091/9869/54554/22976/23512/9739
BP	GO:0050819	negative regulation of coagulation	48	0.55538	2.31265	1.21431e-06	1.50027e-05	9.42942e-06	6235	tags=60%, list=25%, signal=46%	114897/5156/7056/710/7057/5054/1906/4846/928/2160/10544/18/5055/5627/5327/7103/1361/308/2811/3848/10019/634/2191/2243/350/2244/5270/5340/3818
BP	GO:0002761	regulation of myeloid leukocyte differentiation	105	0.423573	2.05191	1.22625e-06	1.51264e-05	9.50715e-06	5201	tags=48%, list=21%, signal=38%	2353/3665/4609/3398/7071/9770/3059/2124/7099/8600/1230/6422/677/714/4067/920/3635/7098/7305/10272/7189/972/9935/325/3565/7107/841/4920/3593/11025/1021/5925/51561/10234/6348/7124/11006/9607/2200/169200/3458/3976/8772/6886/8111/7130/8451/5196/634/1051
BP	GO:0006809	nitric oxide biosynthetic process	64	0.505314	2.21978	1.26087e-06	1.55289e-05	9.76014e-06	4861	tags=47%, list=19%, signal=38%	9314/5743/10365/3553/80149/7099/3717/706/1906/1545/1191/2643/5311/4846/5740/64581/199/4317/9104/6648/961/6095/2185/140885/7124/64902/3458/857/148022/10333
BP	GO:0043303	mast cell degranulation	47	0.56311	2.32784	1.27594e-06	1.56899e-05	9.86135e-06	5012	tags=55%, list=20%, signal=44%	695/5730/11314/3162/10125/2294/4067/2268/5880/5294/640/3596/8723/3565/8773/8832/6850/3965/3598/201294/6284/5293/6845/5729/7462/3566
BP	GO:2001057	reactive nitrogen species metabolic process	69	0.497162	2.23333	1.29994e-06	1.596e-05	1.00311e-05	3323	tags=38%, list=13%, signal=33%	9314/5743/10365/3553/80149/7099/3717/706/1906/1545/1191/2643/5311/4846/5740/7097/64581/199/4317/9104/6648/961/6095/2185/140885/7124
CC	GO:0016607	nuclear speck	330	-0.350614	-1.73324	1.31075e-06	1.60675e-05	1.00987e-05	4727	tags=35%, list=19%, signal=29%	23067/5930/7486/10421/4116/55735/5501/85417/9904/26235/5566/51533/9879/5563/51329/8859/10521/25831/23198/50809/6046/8899/55105/535/124790/10919/3984/9775/51631/92609/56478/27339/3299/6629/23524/3203/8930/80764/49855/9733/8535/84271/6944/80237/83759/28999/11339/6627/7737/84662/11052/51547/9128/10915/9794/5546/6732/57187/5433/25936/80230/64852/23236/11252/55898/80196/29890/84164/328/51340/6015/1133…
BP	GO:0010863	positive regulation of phospholipase C activity	37	0.611919	2.39891	1.32166e-06	1.61759e-05	1.01668e-05	3201	tags=51%, list=13%, signal=45%	5156/942/728/64805/3702/1902/6401/3357/2099/148/2247/5031/11331/7294/5724/2769/27/5741/5330
CC	GO:0097525	spliceosomal snRNP complex	49	-0.579623	-2.19128	1.3343e-06	1.63052e-05	1.0248e-05	3636	tags=57%, list=14%, signal=49%	10421/83443/153527/10907/51631/6633/6629/6627/6631/27336/6628/9128/6634/6636/8175/25766/57819/6635/10992/10946/9129/26121/6637/9343/25804/6626/10713/9416
CC	GO:0031091	platelet alpha granule	86	0.45834	2.15986	1.34653e-06	1.64289e-05	1.03258e-05	6515	tags=49%, list=26%, signal=36%	5552/2/710/7057/22915/1675/5054/5768/6403/1191/3671/7043/928/5099/6678/10490/6622/5175/6814/7076/10184/2621/5627/3082/12/2162/7058/83706/6845/3479/351/7424/78991/5196/2243/2244/7042/5005/5270/5340/9749/5265
BP	GO:2001233	regulation of apoptotic signaling pathway	328	0.291786	1.65764	1.37949e-06	1.68049e-05	1.05621e-05	4736	tags=33%, list=19%, signal=27%	4170/4780/5743/7164/9709/8406/6387/4609/3091/8575/7057/6279/3553/1621/5054/51330/467/2395/960/4804/1540/3717/6422/3162/5329/65018/7178/7078/1191/653/120892/6154/7001/5788/355/4118/596/6280/8742/2950/4824/8915/4846/6477/7314/1984/8738/972/10449/5970/9451/8382/54361/3958/3565/2139/50486/50484/1459/3383/6648/5925/10413/4055/5663/79156/56917/5366/1075/6615/1654/291/1491/162989/7128/389400/3082/7124/2…
BP	GO:0002825	regulation of T-helper 1 type immune response	29	0.653831	2.40267	1.38882e-06	1.68923e-05	1.06171e-05	3041	tags=48%, list=12%, signal=42%	9173/6363/3553/301/8809/3594/3554/6504/729230/84868/3593/6556/51561/3142
BP	GO:0006801	superoxide metabolic process	65	0.506715	2.22638	1.39228e-06	1.69081e-05	1.0627e-05	4341	tags=48%, list=17%, signal=40%	2358/4780/653361/10516/1906/7001/2643/654817/1536/2950/4846/7305/64581/4689/51167/6648/4688/84329/6850/6505/6649/3689/9973/3684/5446/654816/79400/2773/2771/6647/683
BP	GO:0043542	endothelial cell migration	200	0.347799	1.85432	1.40985e-06	1.70685e-05	1.07278e-05	5773	tags=40%, list=23%, signal=31%	9314/4780/5743/388/3397/1634/1969/3091/7057/7010/80149/2658/3164/5547/301/84913/3162/1906/1545/2113/1960/54453/79812/8742/659/2247/9353/4846/9404/5294/6915/23328/5872/11167/306/27286/5176/6678/2013/8828/64218/5606/64094/5641/2625/375056/94/168667/11235/2185/5764/7124/9734/5728/5293/5286/284/6237/7424/147372/55466/23411/8503/6776/161198/634/1647/1803/2191/57381/26585/14/350/10000/387/2246/2249/579…
BP	GO:0010959	regulation of metal ion transport	348	0.296139	1.68407	1.40911e-06	1.70685e-05	1.07278e-05	4413	tags=28%, list=18%, signal=24%	6347/1318/5743/5142/6387/353514/567/2534/7852/2669/5144/5621/1230/5999/6352/288/2040/2745/5336/3781/10288/706/51185/10268/287/3280/4067/6324/57817/920/7779/2273/596/30845/1193/5311/967/4846/5294/9446/3753/53827/483/5652/3596/53826/5023/5031/57165/79026/11151/2149/23479/3603/6622/11027/3958/126306/3783/9104/4283/8832/4638/945/5187/387129/6844/6546/115352/6548/2258/2185/801/27075/3208/6348/6769/947…
BP	GO:0051896	regulation of protein kinase B signaling	148	0.380453	1.9543	1.42255e-06	1.71957e-05	1.08078e-05	4142	tags=32%, list=16%, signal=27%	6363/114897/6366/1969/10253/7057/64805/7010/2022/558/3084/3059/57142/8600/1236/65018/85453/55024/6425/10268/1839/1116/2247/2152/5294/708/23533/3488/10855/2625/56917/940/4915/2621/389400/6348/7124/8692/57333/92140/5728/5293/409/284/6237/3480/5008
BP	GO:0002369	T cell cytokine production	38	0.610837	2.4198	1.49027e-06	1.79313e-05	1.12701e-05	2460	tags=50%, list=10%, signal=45%	1604/975/3569/567/3553/7133/10892/114548/8809/3134/3554/4092/6504/91543/7189/729230/3565/1178/2625
BP	GO:0002724	regulation of T cell cytokine production	38	0.610837	2.4198	1.49027e-06	1.79313e-05	1.12701e-05	2460	tags=50%, list=10%, signal=45%	1604/975/3569/567/3553/7133/10892/114548/8809/3134/3554/4092/6504/91543/7189/729230/3565/1178/2625
BP	GO:0034765	regulation of ion transmembrane transport	413	0.277565	1.59929	1.48982e-06	1.79313e-05	1.12701e-05	4364	tags=26%, list=17%, signal=22%	6347/1318/5142/25932/2534/2669/5144/5621/5999/288/2040/89822/2745/5336/65018/131096/3781/1906/51185/1520/54102/10268/10550/1393/60598/287/3742/1536/4067/6324/5997/57817/3790/7779/2273/30845/1193/5311/967/3764/5294/9446/3753/53827/3778/483/3596/53826/5023/729230/5031/774/5649/57165/79026/11151/11331/1080/3773/2149/5724/23479/6622/3769/93589/126306/3783/9104/4283/84329/5663/3738/3772/387129/6844/65…
BP	GO:0051767	nitric-oxide synthase biosynthetic process	19	0.753975	2.44976	1.51286e-06	1.81474e-05	1.14059e-05	4330	tags=79%, list=17%, signal=65%	6347/10135/7099/3717/90865/1906/120892/2950/7097/9590/5606/6772/64127/2208/3458
BP	GO:0051769	regulation of nitric-oxide synthase biosynthetic process	19	0.753975	2.44976	1.51286e-06	1.81474e-05	1.14059e-05	4330	tags=79%, list=17%, signal=65%	6347/10135/7099/3717/90865/1906/120892/2950/7097/9590/5606/6772/64127/2208/3458
BP	GO:0009063	cellular amino acid catabolic process	100	0.434872	2.08797	1.52998e-06	1.83247e-05	1.15173e-05	7027	tags=52%, list=28%, signal=38%	51166/8942/6999/64577/4846/549/3155/51380/594/6898/10157/1738/2653/2108/3242/38/8564/593/18/3712/4329/6470/51268/64087/2954/3176/443/54511/64902/26275/5009/2184/2875/137872/10841/27034/27165/144193/7915/3034/130013/384/1757/383/4143/10993/8659/1036/4942/36/84706/8528
BP	GO:0046640	regulation of alpha-beta T cell proliferation	32	0.635854	2.40852	1.54855e-06	1.85187e-05	1.16393e-05	2801	tags=56%, list=11%, signal=50%	26191/1604/975/3659/3133/3717/10148/5788/7048/729230/916/3593/7535/57045/6850/3965/51561/940
BP	GO:0050678	regulation of epithelial cell proliferation	307	0.305727	1.72126	1.55105e-06	1.85204e-05	1.16404e-05	3958	tags=27%, list=16%, signal=23%	7538/6347/3037/3725/3397/6387/728/4609/3091/7057/567/7010/864/1893/7472/654/2658/3164/57142/4804/240/3357/6422/4070/84913/3162/3676/1910/26051/677/653/7039/3280/595/1960/79812/8742/80173/64919/60485/659/2247/2152/4824/6774/116844/185/5176/6678/11331/8828/7049/3593/7075/9104/1027/1021/5925/10413/5080/2625/94/6369/4163/11235/55081/151306/998/26277/687/49860/7128/5764/7124/58495/1361/7421/5728/6772/…
BP	GO:0010574	regulation of vascular endothelial growth factor production	31	0.64833	2.44819	1.58645e-06	1.89143e-05	1.18879e-05	2845	tags=48%, list=11%, signal=43%	5743/3572/3569/728/3091/3553/718/719/1545/57447/729230/55959/9451/10855/6095
BP	GO:0007098	centrosome cycle	103	-0.465812	-2.00695	1.61402e-06	1.92137e-05	1.20761e-05	4003	tags=38%, list=16%, signal=32%	9371/6566/3834/80254/163786/84612/116840/54875/4957/11190/25914/22995/4591/284403/3832/1111/55968/55226/4751/2801/1070/55835/55722/55755/10733/6491/7840/672/9793/55125/585/10403/1639/7517/10432/29901/7514/899/6790
BP	GO:0031577	spindle checkpoint signaling	37	-0.634395	-2.24236	1.62955e-06	1.93692e-05	1.21738e-05	1553	tags=49%, list=6%, signal=46%	56155/55743/55055/11130/9319/7756/55755/4085/699/7272/891/81620/1063/9212/10403/9735/7517/84861
BP	GO:2000516	positive regulation of CD4-positive, alpha-beta T cell activation	38	0.608409	2.41018	1.63806e-06	1.94226e-05	1.22074e-05	4330	tags=63%, list=17%, signal=52%	6363/1604/975/942/5588/10892/114548/301/3594/3125/64332/8651/7048/11126/3122/3593/9308/3965/51561/84807/3142/3071/941/3458
BP	GO:0019884	antigen processing and presentation of exogenous antigen	43	0.576261	2.35961	1.63901e-06	1.94226e-05	1.22074e-05	5128	tags=63%, list=20%, signal=50%	567/912/3133/3134/1520/3125/3117/2207/7189/972/3113/3119/3115/3122/50856/3111/2213/5641/3126/911/913/3109/8722/3112/3140/3551/3105
MF	GO:0035064	methylated histone binding	64	-0.537985	-2.15279	1.64945e-06	1.94874e-05	1.22481e-05	5897	tags=48%, list=23%, signal=37%	124359/5977/359787/7158/222229/11137/26147/2332/10927/80764/26009/84733/8535/23310/29128/23468/169981/6872/29057/54892/23170/139886/54799/2956/57680/11335/30827/23613/11091/23512/83746
MF	GO:0140034	methylation-dependent protein binding	64	-0.537985	-2.15279	1.64945e-06	1.94874e-05	1.22481e-05	5897	tags=48%, list=23%, signal=37%	124359/5977/359787/7158/222229/11137/26147/2332/10927/80764/26009/84733/8535/23310/29128/23468/169981/6872/29057/54892/23170/139886/54799/2956/57680/11335/30827/23613/11091/23512/83746
CC	GO:0044815	DNA packaging complex	88	-0.487832	-2.06071	1.68935e-06	1.98834e-05	1.2497e-05	4477	tags=44%, list=18%, signal=37%	196528/8607/50809/6597/6599/86/257218/2547/6605/6944/23310/27127/442582/8243/58531/6601/64940/54441/8289/9918/1058/83540/6598/54892/147841/55929/10051/57405/54799/10592/57634/10902/64151/6602/10403/8940/29781/65980/8295
BP	GO:0006479	protein methylation	137	-0.432101	-1.93972	1.69059e-06	1.98834e-05	1.2497e-05	3971	tags=34%, list=16%, signal=28%	26147/8473/10919/59336/55677/4801/26053/56341/23476/55251/10196/10419/6628/79813/51547/80204/11105/63925/4802/6634/23168/54880/64324/1387/29104/29072/4221/6830/1786/3054/672/6598/4800/65094/90780/10445/6839/30827/1789/2146/11091/9869/54554/22976/23512/9739
BP	GO:0008213	protein alkylation	137	-0.432101	-1.93972	1.69059e-06	1.98834e-05	1.2497e-05	3971	tags=34%, list=16%, signal=28%	26147/8473/10919/59336/55677/4801/26053/56341/23476/55251/10196/10419/6628/79813/51547/80204/11105/63925/4802/6634/23168/54880/64324/1387/29104/29072/4221/6830/1786/3054/672/6598/4800/65094/90780/10445/6839/30827/1789/2146/11091/9869/54554/22976/23512/9739
BP	GO:0043368	positive T cell selection	33	0.63727	2.42746	1.73525e-06	2.03782e-05	1.2808e-05	3417	tags=58%, list=14%, signal=50%	3569/3662/3594/915/10538/5788/1794/596/114836/64919/4063/6774/972/917/916/3593/7535/51561/3707
MF	GO:0004857	enzyme inhibitor activity	329	0.295483	1.68157	1.75214e-06	2.05457e-05	1.29133e-05	4569	tags=30%, list=18%, signal=25%	9021/10253/2/710/1471/5271/8826/9535/7980/5054/8530/939/5272/5621/54658/301/10628/831/25816/1992/55742/718/56925/9806/7078/120892/9349/5997/6050/5858/6224/2646/9353/307/8651/306/116154/23038/5176/51232/6694/5918/5267/54577/256394/58189/6622/3958/9467/51562/10653/128488/6125/1027/329/5636/7079/684/7076/10129/151242/94274/5055/199713/58529/6059/221692/10935/2621/5627/720/5764/10406/11006/8434/12/72…
BP	GO:0043011	myeloid dendritic cell differentiation	19	0.750794	2.43942	1.76692e-06	2.06881e-05	1.30028e-05	3034	tags=58%, list=12%, signal=51%	55509/3662/10538/7048/7189/3565/4055/5663/116071/3694/6688
CC	GO:0000152	nuclear ubiquitin ligase complex	42	-0.612398	-2.22168	1.77341e-06	2.0733e-05	1.3031e-05	3893	tags=52%, list=15%, signal=44%	64682/10336/9820/51434/84733/8535/51239/80012/51343/54880/6015/51433/672/51529/580/991/29945/29882/84759/140459/11065/8697
BP	GO:0016525	negative regulation of angiogenesis	85	0.460249	2.15584	1.78419e-06	2.0828e-05	1.30907e-05	5723	tags=44%, list=23%, signal=34%	9314/9510/1634/1969/10253/7057/10365/7010/5054/2658/240/11117/2296/729230/5176/11126/6678/64218/354/6558/7075/5140/57556/7124/23166/7058/6772/1285/6093/4881/3627/5196/1647/350/7042/356/5797
MF	GO:0015026	coreceptor activity	42	0.575864	2.33845	1.78979e-06	2.08623e-05	1.31122e-05	3376	tags=43%, list=13%, signal=37%	942/7852/2022/925/92/4804/3676/23547/10268/920/10663/23643/7049/2239/4920/940/285704/8434
BP	GO:0051784	negative regulation of nuclear division	53	-0.5692	-2.17608	1.7971e-06	2.09163e-05	1.31462e-05	2954	tags=40%, list=12%, signal=35%	55055/652/27085/1111/11130/9319/7756/55755/4085/699/26271/7272/891/81620/1063/9212/10403/9735/7517/286151/84861
CC	GO:0042581	specific granule	144	0.380048	1.9323	1.80036e-06	2.09232e-05	1.31506e-05	6144	tags=47%, list=24%, signal=36%	2358/6515/567/7133/5199/2040/5329/5787/5768/719/160364/1536/1794/1116/1265/116844/306/57153/23191/5023/820/4069/963/8773/10855/4317/311/54918/961/84329/945/6814/6793/2919/3689/79895/4790/6590/3684/7414/5873/6947/5906/3163/9522/81619/10396/1669/30/3240/2352/56954/683/1182/11026/1535/634/3685/966/23601/102/25797/4057/64386/5005/126014/383/57554
BP	GO:0062207	regulation of pattern recognition receptor signaling pathway	90	0.451767	2.12468	1.80647e-06	2.09321e-05	1.31562e-05	5736	tags=52%, list=23%, signal=40%	26191/3665/11213/3659/7099/57142/11314/54941/55601/3662/2099/23547/4067/26057/7098/7096/708/91543/7097/11027/329/6397/2672/89870/1654/115352/338382/7128/8780/57162/8638/409/64127/3929/857/79132/54726/10333/1535/7105/56927/54106/9867/55366/51296/4057/7100
BP	GO:0071560	cellular response to transforming growth factor beta stimulus	227	0.330186	1.79846	1.80523e-06	2.09321e-05	1.31562e-05	4468	tags=33%, list=18%, signal=27%	1398/2353/3725/3397/10253/7057/2534/678/2022/7123/7472/6386/9719/27122/4091/6422/11117/8483/9839/1906/5138/677/269/8425/83891/27063/4092/7043/2615/2530/9404/6774/116844/7048/5494/56940/80310/54361/2331/7049/2339/3565/65997/10252/5678/3987/57045/4093/26524/94/8754/3675/3694/6688/255743/22938/58495/8692/10370/858/64081/409/56937/93649/1281/90/8576/2908/3480/7525/2200/857/11171/8837
BP	GO:0002710	negative regulation of T cell mediated immunity	27	0.670714	2.42716	1.81614e-06	2.09979e-05	1.31975e-05	4072	tags=56%, list=16%, signal=47%	3575/3134/5788/339390/4092/3821/6504/56940/3824/2213/11006/64127/3456/5532/3071
BP	GO:0002430	complement receptor mediated signaling pathway	10	0.874718	2.30164	1.81751e-06	2.09979e-05	1.31975e-05	2533	tags=80%, list=10%, signal=72%	2357/2358/728/2359/719/2854/1378/1240
MF	GO:0004497	monooxygenase activity	95	0.445817	2.10679	1.8604e-06	2.14617e-05	1.3489e-05	5285	tags=49%, list=21%, signal=39%	9023/1544/51302/1621/2327/1571/6916/3162/1576/1545/1592/8529/4846/2328/2329/5740/5066/26002/1562/113612/284541/1559/2330/1555/1549/1543/54905/1593/8564/1580/1558/1548/1551/1573/6718/1582/3163/1565/64816/64780/5092/1577/29785/51004/1591/121278/1579
BP	GO:0050855	regulation of B cell receptor signaling pathway	17	0.771642	2.38135	1.86362e-06	2.14673e-05	1.34925e-05	2884	tags=53%, list=11%, signal=47%	26191/975/11314/5583/4067/9404/640/2213/115352
CC	GO:0032993	protein-DNA complex	110	-0.461528	-2.00239	1.87612e-06	2.15795e-05	1.3563e-05	4804	tags=46%, list=19%, signal=38%	6667/1482/8607/50809/2957/5558/2960/2138/4801/86/257218/5076/6908/2547/51659/10714/6944/84296/5557/5591/7709/3728/4802/58531/64785/29935/4175/142/26471/4173/5437/1058/4176/55290/2972/4800/55929/4172/54799/57634/10902/2071/4174/5424/4171/6666/5422/29980/23649/8295/23512
MF	GO:0019956	chemokine binding	26	0.683664	2.46448	1.93911e-06	2.22387e-05	1.39774e-05	2929	tags=50%, list=12%, signal=44%	7538/2/7852/1230/1236/3676/2247/10663/729230/643/2833/10803/1233
BP	GO:0048015	phosphatidylinositol-mediated signaling	158	0.373927	1.93217	1.93712e-06	2.22387e-05	1.39774e-05	4142	tags=35%, list=16%, signal=29%	5156/1634/22933/56034/7010/3059/1436/653361/6352/3717/3357/1906/26051/6403/118788/10125/677/5334/2268/2247/4824/847/5294/708/10870/5649/4883/11126/23533/2149/80310/5724/5783/113791/4920/2322/5343/5289/2625/9651/940/49860/4915/5330/3082/7124/10507/5728/375033/5293/5286/284/3480/3479/5008
BP	GO:0016485	protein processing	218	0.333553	1.79816	1.99767e-06	2.28769e-05	1.43785e-05	5564	tags=40%, list=22%, signal=31%	715/5552/837/2619/3428/7057/4311/7123/5054/8530/5621/2395/119587/831/51279/7850/922/1520/824/120892/2934/10418/9509/834/2737/590/11093/23621/839/2152/85409/83874/64065/3083/5567/2158/27141/649/2160/9528/444/2028/841/354/5289/5641/5663/79659/1889/60559/9512/6196/1203/59272/8532/25825/199713/7092/83752/26999/5327/10159/1361/7113/3250/3240/8772/147372/2734/81555/84976/3633/56265/1359/1803/5653/50846…
BP	GO:0033003	regulation of mast cell activation	41	0.58363	2.3585	2.01921e-06	2.30897e-05	1.45123e-05	2910	tags=41%, list=12%, signal=37%	5359/10666/11314/3162/2294/4067/2268/5880/640/3596/8723/3565/8832/6850/3965/3598/201294
BP	GO:0030282	bone mineralization	107	0.415764	2.02586	2.03739e-06	2.32637e-05	1.46216e-05	4723	tags=36%, list=19%, signal=30%	5743/5552/3091/1893/7071/7123/654/92/51119/1230/240/2268/7043/659/4256/249/9451/54361/29887/166929/57419/4920/22904/6546/5741/2185/338773/5764/6348/4958/154/55589/9562/90/3479/8074/2824/4146/2697
BP	GO:0042537	benzene-containing compound metabolic process	23	0.708191	2.4711	2.07403e-06	2.36202e-05	1.48456e-05	5638	tags=74%, list=22%, signal=57%	51166/1571/54658/1545/8942/6999/64577/2947/6716/8564/1580/2053/5446/30/2184/116285/2944
BP	GO:0051048	negative regulation of secretion	147	0.379766	1.94066	2.07464e-06	2.36202e-05	1.48456e-05	4436	tags=37%, list=18%, signal=31%	3553/3084/4889/7133/11314/301/6422/415116/3162/7132/3134/1906/1393/2294/8529/7779/5530/90007/91543/972/151/729230/2149/6622/9525/3593/2213/8832/6814/3965/5020/83452/3598/387129/9341/18/64285/6688/4129/3589/7124/26056/80223/23208/5906/9607/150/3071/5008/2771/8074/1813/79651/3976/22925
BP	GO:0045931	positive regulation of mitotic cell cycle	110	-0.460576	-1.99826	2.10917e-06	2.39785e-05	1.50708e-05	3716	tags=44%, list=15%, signal=37%	3169/7027/8450/80174/163786/4212/5889/51434/23476/56257/51692/55920/1845/23236/134353/27085/286053/993/8317/1019/328/51514/150465/5514/994/995/6868/6198/55835/51433/6491/51529/25942/57504/26271/6241/4193/9700/891/990/81620/29945/113130/6240/1981/11065/5578/8697
BP	GO:0002716	negative regulation of natural killer cell mediated immunity	20	0.728134	2.41062	2.11899e-06	2.40552e-05	1.5119e-05	5128	tags=80%, list=20%, signal=64%	1398/3133/5272/3134/3106/10225/3821/3824/84868/3965/3805/387837/409/100507436/634/3105
BP	GO:0006887	exocytosis	319	0.294329	1.66227	2.1638e-06	2.45283e-05	1.54164e-05	4400	tags=32%, list=17%, signal=27%	8676/695/5730/6386/51762/11314/1230/301/6352/94120/3162/3134/143425/10125/120892/1393/2294/23086/4067/148/2268/5880/23621/152579/5294/5872/5866/85409/11031/94122/640/22999/10972/306/3596/9367/5023/729230/11151/1080/10490/5724/57586/6622/9525/8723/54843/3565/57111/8773/84106/64005/5341/2213/8867/9381/5663/375056/8832/6814/6850/3965/83452/11069/26154/3055/3598/107/9341/6844/201294/3689/6688/5868/55…
BP	GO:0001867	complement activation, lectin pathway	12	0.838946	2.34174	2.1845e-06	2.47272e-05	1.55414e-05	2585	tags=83%, list=10%, signal=75%	4239/2/710/2220/78989/10584/8547/2219/4153/10747
BP	GO:0001935	endothelial cell proliferation	135	0.377689	1.90883	2.25711e-06	2.54754e-05	1.60117e-05	2813	tags=28%, list=11%, signal=25%	6347/3725/1969/6387/3091/7057/7010/1893/7472/654/2658/3164/4804/240/3357/84913/3162/3676/26051/1960/79812/8742/659/2247/2152/6774/116844/60675/185/6678/8828/3593/7075/94/6369/168667/55145/11235
BP	GO:0008202	steroid metabolic process	294	0.305839	1.71279	2.25528e-06	2.54754e-05	1.60117e-05	4350	tags=31%, list=17%, signal=26%	1958/5156/9023/25976/1544/133/3949/51302/319/654/3290/1571/114876/54658/27122/54657/2099/1576/706/1910/1545/3931/653/1592/51141/33/5959/3294/51170/3490/114879/847/6609/6783/10449/185/1559/1080/54577/6716/2330/1555/8720/54361/6342/3565/51144/25987/6715/7366/5641/51700/7923/2232/1543/2672/427/412/1593/38/6615/1066/6095/1071/37/2230/10613/1558/1548/4790/10170/7124/1551/27120/11160/6718/8608/54659/20…
BP	GO:0050672	negative regulation of lymphocyte proliferation	75	0.482926	2.18951	2.2737e-06	2.56242e-05	1.61052e-05	4115	tags=44%, list=16%, signal=37%	942/695/11314/5621/11326/10288/339390/6441/4067/3635/7940/2615/23495/7305/640/79679/84868/80380/2213/1378/57045/4332/3965/149041/1493/27242/57162/11006/56253/472/868/8379/941
CC	GO:0005770	late endosome	241	0.320498	1.76519	2.27684e-06	2.56242e-05	1.61052e-05	4769	tags=34%, list=19%, signal=28%	1318/388/9741/55858/3949/7852/9482/8417/8530/11342/5604/114876/55340/973/285195/7178/51510/1520/3125/120892/1393/6441/2674/84174/967/3920/83547/23621/51009/255231/79720/972/9367/2149/201931/10490/55240/9525/9528/146894/6614/3122/79443/3593/92421/5289/9227/5641/114885/3126/6505/653145/7405/6556/684/9516/9476/2904/54602/913/201294/338382/78992/6653/153020/968/3109/5873/55315/5906/51028/6845/27183/5…
CC	GO:0030532	small nuclear ribonucleoprotein complex	58	-0.54381	-2.11753	2.28649e-06	2.5696e-05	1.61503e-05	3636	tags=47%, list=14%, signal=40%	51631/6633/6629/56257/6627/6631/27336/6628/125050/9128/134353/6634/6636/8175/25766/57819/6635/10992/10946/9129/26121/6637/9343/25804/6626/10713/9416
BP	GO:0055072	iron ion homeostasis	76	0.465631	2.12671	2.32057e-06	2.60415e-05	1.63675e-05	4330	tags=41%, list=17%, signal=34%	4609/3091/8301/567/654/2658/2395/79901/79689/3162/57817/30061/64116/9843/81894/1356/2034/23479/55240/2495/6648/6556/4756/286133/3263/26234/8692/94033/3163/6647/3458
BP	GO:0002407	dendritic cell chemotaxis	22	0.713547	2.45008	2.33801e-06	2.61997e-05	1.64669e-05	3174	tags=59%, list=13%, signal=52%	6363/6366/7852/1230/6352/1236/5294/6504/708/729230/3965/6688/2621
BP	GO:0051383	kinetochore organization	16	-0.786021	-2.26763	2.41361e-06	2.69832e-05	1.69593e-05	1836	tags=69%, list=7%, signal=64%	23126/1058/83540/10051/1062/10592/81620/64105/1063/10403/9735
BP	GO:0052126	movement in host environment	160	0.365197	1.88613	2.41481e-06	2.69832e-05	1.69593e-05	5369	tags=40%, list=21%, signal=32%	1604/4061/1969/975/9023/5359/942/10346/3949/1949/7852/558/8519/8547/51510/2934/339390/920/2219/4684/10332/6504/6520/6609/6404/79720/972/185/325/9525/6614/85363/1508/92421/6554/3383/2060/3695/1378/3965/5091/7405/59272/3694/3416/2621/8692/858/7113/27183/941/3839/57132/857/6737/10410/55207/7251/9218/55223/6575/3685/10581/23601
BP	GO:0032715	negative regulation of interleukin-6 production	42	0.569598	2.31301	2.47161e-06	2.75785e-05	1.73335e-05	4072	tags=45%, list=16%, signal=38%	26191/11213/10365/80149/7099/55024/3635/6504/84868/8832/2621/7128/3082/140885/7124/11006/23208/409/3071
BP	GO:0030195	negative regulation of blood coagulation	45	0.554977	2.28181	2.53414e-06	2.81964e-05	1.77219e-05	6235	tags=60%, list=25%, signal=45%	114897/5156/7056/710/7057/5054/1906/4846/928/2160/18/5055/5627/5327/7103/1361/2811/3848/10019/634/2191/2243/350/2244/5270/5340/3818
BP	GO:0070527	platelet aggregation	64	0.492117	2.1618	2.53419e-06	2.81964e-05	1.77219e-05	5582	tags=52%, list=22%, signal=40%	114897/3572/5156/3569/5588/64805/22915/3717/4067/5294/640/928/10077/5341/6814/6850/3611/18/2316/7414/84034/375033/10398/2811/83706/71/4352/10019/634/2243/2244/1511/3043
BP	GO:0070192	chromosome organization involved in meiotic cell cycle	50	-0.570222	-2.15846	2.66597e-06	2.96206e-05	1.8617e-05	5559	tags=52%, list=22%, signal=41%	5885/83990/4438/4292/56154/317761/27030/10919/84690/5889/5518/23310/11144/51547/29893/2177/9918/9319/10111/699/10051/10592/898/29781/9134/4439
BP	GO:0002347	response to tumor cell	38	0.601205	2.38164	2.74772e-06	3.04856e-05	1.91607e-05	5357	tags=55%, list=21%, signal=44%	9314/10666/10628/27303/3125/7001/11126/347252/5551/7805/84868/3593/51225/6688/56253/4818/100507436/3140/634/3105/9940
BP	GO:0002335	mature B cell differentiation	32	0.625129	2.36789	2.78477e-06	3.08531e-05	1.93916e-05	3034	tags=50%, list=12%, signal=44%	3569/10892/5336/602/139818/112616/159296/2213/1378/9452/3394/5450/55619/59067/2185/6688
BP	GO:0048545	response to steroid hormone	300	0.298343	1.66734	2.85085e-06	3.15405e-05	1.98237e-05	2427	tags=22%, list=10%, signal=20%	7538/2354/2353/5743/5732/4306/3569/2/9611/7057/133/678/2022/654/54658/301/11170/10628/3717/2099/6422/706/1906/1545/2104/3931/677/595/1536/3485/596/590/7043/3490/5069/4824/9353/6943/7048/55325/5066/306/358/249/7097/5176/11331/199/6716/5724/3557/1667/1668/594/8061/6898/26508/210/2322/6715/57658/81606/10728/10413/10888
CC	GO:0120114	Sm-like protein family complex	68	-0.520615	-2.10499	2.85687e-06	3.15626e-05	1.98375e-05	3636	tags=43%, list=14%, signal=37%	51631/25929/6633/79833/6629/56257/6627/6631/27336/6628/125050/9128/134353/6634/6636/8175/25766/57819/6635/10992/10946/9129/26121/6637/9343/25804/6626/10713/9416
BP	GO:0032743	positive regulation of interleukin-2 production	33	0.628242	2.39307	2.8708e-06	3.16717e-05	1.99062e-05	2801	tags=58%, list=11%, signal=51%	942/5588/5142/3553/5144/10892/301/3662/5336/5788/920/7189/64581/729230/79679/916/84433/9308/940
BP	GO:1900274	regulation of phospholipase C activity	39	0.58944	2.3541	2.88003e-06	3.17289e-05	1.99421e-05	3201	tags=49%, list=13%, signal=43%	5156/942/728/64805/3702/1902/6401/3357/2099/148/2247/5031/11331/7294/5724/2769/27/5741/5330
BP	GO:1903531	negative regulation of secretion by cell	126	0.394253	1.97718	2.89166e-06	3.18106e-05	1.99935e-05	4351	tags=38%, list=17%, signal=32%	3553/4889/7133/11314/301/6422/415116/3162/7132/3134/1906/1393/2294/7779/5530/90007/91543/151/729230/2149/6622/9525/3593/2213/8832/6814/3965/83452/3598/9341/18/64285/6688/4129/3589/26056/80223/23208/5906/9607/150/3071/5008/2771/8074/1813/79651/3976
MF	GO:0005178	integrin binding	146	0.373483	1.9023	2.89557e-06	3.18106e-05	1.99935e-05	7023	tags=48%, list=28%, signal=35%	975/10666/6387/7057/3553/3084/10516/11117/3676/3680/3385/8425/4067/310/1842/2674/11093/2247/928/2013/959/9358/3383/3695/1307/6850/977/8754/3675/3681/3694/3689/255743/5764/58494/3684/7103/1281/83706/1285/1289/83700/3479/2200/2208/2670/3682/3913/2191/3685/10457/102/3384/2246/8515/5771/3912/10979/3964/5478/3936/7106/27329/50848/9636/3693/6376/84978/4240/55612
BP	GO:0042531	positive regulation of tyrosine phosphorylation of STAT protein	62	0.496121	2.16801	2.98518e-06	3.27492e-05	2.05834e-05	4351	tags=42%, list=17%, signal=35%	3572/3569/2534/3059/1436/6352/3717/7132/3600/3280/4067/3596/3565/3593/2322/23529/51561/59067/3263/7124/3479/5008/2056/2690/3458/3976
BP	GO:0045123	cellular extravasation	69	0.482249	2.16634	3.11708e-06	3.41484e-05	2.14628e-05	4453	tags=46%, list=18%, signal=38%	1398/6347/5734/6366/6387/6402/10894/10164/6401/3676/3554/6403/5294/6404/729230/80310/5724/5175/3383/3695/961/119/2529/58494/140885/7124/5293/83700/683/8772/6093/11035
BP	GO:0043550	regulation of lipid kinase activity	59	0.524832	2.29403	3.13156e-06	3.42591e-05	2.15323e-05	3009	tags=41%, list=12%, signal=36%	9021/2358/6363/5156/6366/975/8835/64805/7010/1236/4067/2268/84174/2247/8651/5934/23533/113791/2322/5343/5925/9306/998/2185
BP	GO:0006940	regulation of smooth muscle contraction	55	0.512875	2.19627	3.19863e-06	3.49441e-05	2.19629e-05	4355	tags=42%, list=17%, signal=35%	5743/1906/148/5997/340481/6915/3778/60675/151/5023/2149/5724/5020/9732/18/796/255743/154/93649/150/9312/6647/857
BP	GO:0070304	positive regulation of stress-activated protein kinase signaling cascade	121	0.396436	1.96545	3.20878e-06	3.50061e-05	2.20019e-05	3514	tags=35%, list=14%, signal=30%	6363/6366/7164/3553/9770/85458/80149/6386/653361/4616/7099/4615/939/11342/8600/3489/1236/10125/10550/9464/4067/59341/5609/7098/23328/6504/7189/64581/56940/51562/4317/2213/4055/11235/54910/998/2185/6688/9618/4281/7124/9821
BP	GO:0098869	cellular oxidant detoxification	85	0.451376	2.11428	3.23038e-06	3.51927e-05	2.21192e-05	4437	tags=35%, list=18%, signal=29%	4780/5743/10516/4056/2745/241/10549/7001/2643/114757/64359/6280/1193/2950/4846/847/9446/7837/6648/8288/6649/29914/9973/10935/5742/2954/4259/3240/6647/4257
BP	GO:0051924	regulation of calcium ion transport	215	0.334393	1.80899	3.25459e-06	3.54073e-05	2.2254e-05	4413	tags=33%, list=18%, signal=27%	6347/5743/5142/6387/353514/2534/7852/2669/5144/5621/1230/5999/6352/5336/10288/706/10268/287/3280/4067/920/7779/596/30845/1193/5311/4846/5294/9446/3596/5023/5031/57165/79026/11151/2149/3603/6622/11027/3958/126306/9104/4283/8832/4638/945/387129/6546/115352/6548/2185/801/27075/3208/6348/6769/9474/1394/409/6236/117532/150/3306/28954/2771/2056/6786/1813/857/9455
BP	GO:0045582	positive regulation of T cell differentiation	88	0.444189	2.09043	3.30849e-06	3.58513e-05	2.25331e-05	4612	tags=47%, list=18%, signal=38%	6363/942/864/3575/10892/114548/939/301/3594/10288/10125/5788/1960/2737/64332/8651/7048/972/2736/3565/3122/3593/7535/1378/2625/9308/6850/3965/51561/84807/3142/865/11006/5105/3707/3574/3071/941/3458/2309/7704
BP	GO:0042310	vasoconstriction	78	0.454814	2.08567	3.30321e-06	3.58513e-05	2.25331e-05	5544	tags=46%, list=22%, signal=36%	5743/133/1621/6916/3357/1906/1910/27345/148/659/340481/147/6915/5910/151/5023/185/10800/2149/80852/1889/9732/6546/59272/952/5286/150/3741/857/342527/4313/6869/2243/3363/387/2244
BP	GO:0044403	biological process involved in symbiotic interaction	258	0.313933	1.74137	3.30914e-06	3.58513e-05	2.25331e-05	3534	tags=27%, list=14%, signal=24%	3725/1604/4061/1969/975/9023/5359/942/10346/3949/1949/7852/558/80149/1436/4615/6372/8819/6352/3717/2040/8519/8547/51510/2934/339390/6441/920/2219/4684/54210/10332/6504/6520/6609/6404/79720/972/9367/3078/185/820/325/9525/1667/1105/6614/4153/85363/1508/92421/6554/3383/2060/3695/1378/3965/5091/7405/59272/3694/22938/3080/3416/2621/6882/6348/6950/3434/8692
MF	GO:0043021	ribonucleoprotein complex binding	123	-0.436047	-1.92422	3.32812e-06	3.60071e-05	2.2631e-05	4073	tags=41%, list=16%, signal=35%	23420/56648/7458/1660/2332/23480/83737/9775/92399/5018/283820/60678/25929/92609/6629/3954/10196/143244/55176/25875/11052/10419/6628/8225/23468/3309/4830/54505/27044/6728/23107/55037/3192/4528/6730/7374/4931/9793/84295/4193/3692/26121/6637/54915/6626/26284/57510/2146/91875/29927/23367
BP	GO:1904646	cellular response to amyloid-beta	39	0.587991	2.34831	3.38089e-06	3.64271e-05	2.2895e-05	4861	tags=56%, list=19%, signal=46%	2358/837/2534/7099/5621/4804/3676/23621/2213/3383/5641/5663/2915/7124/154/3480/3479/351/781/2309/2697/10333
BP	GO:0006913	nucleocytoplasmic transport	268	-0.359911	-1.73888	3.37659e-06	3.64271e-05	2.2895e-05	5210	tags=36%, list=21%, signal=29%	5501/6788/3838/22916/7249/3842/5566/10768/6469/30000/51496/51366/6789/11260/3840/51715/1660/55677/2932/63928/64328/55705/4088/9887/56478/3313/2010/3326/652/84271/4686/11052/51547/10762/3728/26263/55374/57187/5433/55341/8841/1871/2810/3837/8536/29890/55746/5905/5976/4734/54830/5514/55198/23381/65110/29072/6830/4763/1020/10155/9972/5310/65109/65083/9670/8086/55696/23214/55929/23511/23534/580/3692/2…
BP	GO:0051169	nuclear transport	268	-0.359911	-1.73888	3.37659e-06	3.64271e-05	2.2895e-05	5210	tags=36%, list=21%, signal=29%	5501/6788/3838/22916/7249/3842/5566/10768/6469/30000/51496/51366/6789/11260/3840/51715/1660/55677/2932/63928/64328/55705/4088/9887/56478/3313/2010/3326/652/84271/4686/11052/51547/10762/3728/26263/55374/57187/5433/55341/8841/1871/2810/3837/8536/29890/55746/5905/5976/4734/54830/5514/55198/23381/65110/29072/6830/4763/1020/10155/9972/5310/65109/65083/9670/8086/55696/23214/55929/23511/23534/580/3692/2…
BP	GO:1900047	negative regulation of hemostasis	46	0.553873	2.29065	3.40078e-06	3.6591e-05	2.2998e-05	6235	tags=59%, list=25%, signal=44%	114897/5156/7056/710/7057/5054/1906/4846/928/2160/18/5055/5627/5327/7103/1361/2811/3848/10019/634/2191/2243/350/2244/5270/5340/3818
BP	GO:0002279	mast cell activation involved in immune response	49	0.545824	2.27406	3.42075e-06	3.67554e-05	2.31013e-05	5012	tags=53%, list=20%, signal=43%	695/5730/11314/3162/10125/2294/4067/2268/5880/5294/640/3596/8723/3565/8773/8832/6850/3965/3598/201294/6284/5293/6845/5729/7462/3566
BP	GO:0048661	positive regulation of smooth muscle cell proliferation	76	0.46034	2.10255	3.58992e-06	3.85203e-05	2.42106e-05	1958	tags=30%, list=8%, signal=28%	5743/3725/9510/3569/4609/3398/7057/4889/7099/4615/6352/3717/3162/1906/1839/2247/7048/3596/5031/199/80310/5724/3488
BP	GO:0010389	regulation of G2/M transition of mitotic cell cycle	77	-0.508221	-2.1026	3.5996e-06	3.85713e-05	2.42427e-05	3060	tags=43%, list=12%, signal=38%	5889/23476/9344/55920/1112/60561/51720/993/8317/51343/1019/51514/1111/994/995/65123/9928/56658/672/25942/57504/26271/80279/891/990/1063/9212/57551/6240/29980/84936/641/6790
BP	GO:0061687	detoxification of inorganic compound	16	0.772695	2.35776	3.66424e-06	3.92104e-05	2.46443e-05	1793	tags=62%, list=7%, signal=58%	4499/4502/4493/4494/4501/4489/7779/4495/847/4496
BP	GO:0090257	regulation of muscle system process	210	0.334339	1.80136	3.68241e-06	3.92974e-05	2.4699e-05	4671	tags=34%, list=19%, signal=28%	5743/3572/5142/5144/80149/7133/3164/2308/5999/7132/1906/287/4608/9464/148/5997/57817/59341/30845/1193/4092/5530/340481/147/4846/5294/6915/9446/3778/6442/60675/151/5023/2149/199/5724/3488/7140/5020/29995/9732/6546/59272/18/6548/796/4634/2258/801/255743/5756/154/7135/10398/93649/7139/150/221476/3479/4660/9312/5318/6647/857/10142/6093/10021/2931/2309/54206/775/51086
BP	GO:0042254	ribosome biogenesis	231	-0.372744	-1.78353	3.67988e-06	3.92974e-05	2.4699e-05	5475	tags=42%, list=22%, signal=33%	3921/5901/1662/51121/11340/81875/55272/10248/23223/55027/2971/26609/79050/11103/55003/54475/2091/23481/11224/10521/55636/27043/11137/90121/10799/10438/6201/6128/317781/84128/6227/6155/55164/9277/9775/25926/25983/8450/131870/117246/10199/285855/1736/64434/10885/79954/29093/6169/84231/23560/79039/64963/51116/5591/55661/29777/51547/54555/9136/23195/153443/55341/5303/22907/140801/54663/81887/51154/54…
BP	GO:0030449	regulation of complement activation	17	0.760541	2.34709	3.69794e-06	3.94094e-05	2.47694e-05	3886	tags=71%, list=15%, signal=60%	1604/2/710/3553/11326/718/922/708/722/1378/725/3075
BP	GO:0007260	tyrosine phosphorylation of STAT protein	77	0.469265	2.14141	3.75252e-06	3.99368e-05	2.51009e-05	5014	tags=44%, list=20%, signal=35%	9021/3572/3569/3716/2534/3059/1436/6352/3717/7132/3600/3280/4067/8651/116379/3596/3565/3593/2322/23529/51561/59067/3263/7124/3479/5008/2056/2690/3458/3976/857/10019/10464/5007
MF	GO:0042605	peptide antigen binding	25	0.672815	2.41765	3.88904e-06	4.13336e-05	2.59788e-05	2108	tags=48%, list=8%, signal=44%	3133/3134/3106/3125/10332/3117/3113/3107/3119/3115/3122/3136
BP	GO:0045132	meiotic chromosome segregation	67	-0.526958	-2.12013	3.97065e-06	4.21438e-05	2.6488e-05	6026	tags=52%, list=24%, signal=40%	150280/164045/5885/83990/4438/4292/80198/56154/225689/317761/27030/10919/84690/55743/5889/5518/11144/51547/146956/29893/2177/9319/83540/699/9232/9700/10051/7272/10592/898/29781/80010/9134/7153/4439
CC	GO:0035097	histone methyltransferase complex	50	-0.564242	-2.13583	3.98622e-06	4.22518e-05	2.65559e-05	4933	tags=50%, list=20%, signal=40%	3720/54881/5928/8607/27043/1876/10419/23468/81887/23269/4221/6872/3054/26121/10445/57680/30827/6874/23054/2146/11091/54554/22976/23512/9739
CC	GO:0005814	centriole	108	-0.450972	-1.95962	4.05734e-06	4.29474e-05	2.69931e-05	4094	tags=34%, list=16%, signal=29%	9001/9742/80254/163786/9786/124093/116840/54875/55165/22897/4957/11190/5116/25914/22995/284403/80184/1070/55835/10198/10733/6491/197335/7840/55125/10101/585/25776/347240/54903/7283/1639/9814/8924/7153/899/6790
BP	GO:1902106	negative regulation of leukocyte differentiation	95	0.437586	2.06789	4.12267e-06	4.35801e-05	2.73907e-05	3338	tags=39%, list=13%, signal=34%	4609/3659/3398/864/10875/80149/7099/301/6422/7001/714/4067/3635/2737/4092/7098/8651/10272/972/9935/325/3565/3902/7107/11025/28959/2213/1378/1021/149041/1493/3142/55365/865/10234/6348/11006
BP	GO:0008608	attachment of spindle microtubules to kinetochore	28	-0.671692	-2.2205	4.2032e-06	4.43715e-05	2.78882e-05	1566	tags=57%, list=6%, signal=54%	27436/3192/4751/7756/11004/10615/83540/147841/1062/57405/29127/891/81620/9212/10403/1894
BP	GO:0045786	negative regulation of cell cycle	306	-0.342812	-1.69036	4.22922e-06	4.45861e-05	2.8023e-05	3909	tags=29%, list=16%, signal=25%	124790/56155/23513/55743/3834/80254/25896/3586/27339/836/55055/652/55159/9344/11200/6300/5591/7023/1112/23368/60561/9656/7709/8658/146956/51720/27085/4591/29935/51343/5933/2177/1029/4436/51514/1111/5514/51654/1763/26471/11130/4221/65123/5883/1020/4751/54962/9319/7756/835/56658/55755/4085/3623/672/699/90806/9232/1050/26271/9031/4193/9700/9368/8914/7272/80279/84126/891/144455/990/81620/1063/9212/10…
CC	GO:0071011	precatalytic spliceosome	47	-0.569713	-2.13426	4.25205e-06	4.47666e-05	2.81365e-05	5043	tags=53%, list=20%, signal=43%	83443/153527/10907/84950/6633/10262/6629/23524/6627/7737/6628/9128/6634/6636/8449/8175/57819/6635/10992/10946/9129/26121/6637/9343/25804
MF	GO:0016705	oxidoreductase activity, acting on paired donors, with incorporation or reduction of molecular oxygen	138	0.381865	1.93765	4.26425e-06	4.48347e-05	2.81793e-05	5463	tags=45%, list=22%, signal=35%	5743/9023/1544/51302/1621/2327/1571/6916/3162/1576/1545/8424/1592/8529/55239/4846/2328/2329/5740/5066/26002/1562/54790/113612/284541/1559/2330/1555/283985/444/5033/1549/1543/54905/1593/8564/79966/1580/1558/1548/1551/5742/1573/6718/1582/3163/1565/254295/64816/64780/221120/5092/1577/29785/51004/7404/1591/121278/1579/79068/5264/8846
BP	GO:0033260	nuclear DNA replication	32	-0.645168	-2.18287	4.35773e-06	4.57561e-05	2.87584e-05	2095	tags=50%, list=8%, signal=46%	51750/8317/64785/5976/4175/1763/4173/54962/4172/3978/2237/81620/4171/5422/29980/641
BP	GO:0034110	regulation of homotypic cell-cell adhesion	32	0.618471	2.34268	4.37604e-06	4.5887e-05	2.88406e-05	2852	tags=50%, list=11%, signal=44%	114897/3572/3569/3716/5588/22915/8600/6352/3717/288/5329/4067/640/928/6850/18
BP	GO:0070486	leukocyte aggregation	13	0.807898	2.30834	4.52321e-06	4.73667e-05	2.97707e-05	3401	tags=77%, list=14%, signal=67%	3037/6279/3553/960/6280/5880/7535/6793/58494/10507
BP	GO:0071280	cellular response to copper ion	24	0.686789	2.41783	4.54232e-06	4.75033e-05	2.98566e-05	2660	tags=58%, list=11%, signal=52%	4780/4499/4502/4493/4494/4501/4489/5621/23621/4495/358/4496/6622/1543
MF	GO:0061134	peptidase regulator activity	207	0.33105	1.77504	4.83506e-06	5.04974e-05	3.17384e-05	4919	tags=33%, list=20%, signal=27%	2/710/1471/5271/7980/5054/8530/939/5272/5621/831/25816/1992/65018/718/56925/9806/7078/10010/4118/834/5858/4824/5176/51232/6694/5918/5267/256394/489/58189/6622/10653/128488/10845/329/1075/7079/5118/684/7076/5055/199713/10935/2621/5627/720/10406/8434/12/721/6590/643394/112401/4018/1285/221476/259/351/4803/857/10879/6093/3700/1470/91662/51156/866/26998
BP	GO:0035825	homologous recombination	47	-0.567187	-2.1248	4.92206e-06	5.13376e-05	3.22664e-05	5906	tags=57%, list=23%, signal=44%	164045/5885/83990/4438/4292/64710/80198/317761/27030/5889/8438/84057/11144/11105/146956/11077/25788/29893/2177/116138/83933/9319/10111/10635/80010/7153/4439
BP	GO:0071276	cellular response to cadmium ion	35	0.60039	2.31657	5.02294e-06	5.232e-05	3.28839e-05	1793	tags=40%, list=7%, signal=37%	2353/3725/4499/4502/4493/4494/1544/4501/653361/4489/3162/1536/4495/4496
BP	GO:0051053	negative regulation of DNA metabolic process	109	-0.445332	-1.93303	5.13101e-06	5.33748e-05	3.35469e-05	4458	tags=41%, list=18%, signal=34%	51053/51366/545/3060/2187/167227/84309/3776/50485/64110/7515/23560/81931/8658/7270/51750/4437/6714/56893/4436/1111/142/55226/4221/3192/24144/10155/54962/10111/1676/26271/8914/2956/990/81620/54552/10721/29980/9400/3980/146059/641/23244/80119/9984
BP	GO:0045862	positive regulation of proteolysis	326	0.286211	1.62733	5.22459e-06	5.42761e-05	3.41134e-05	3794	tags=27%, list=15%, signal=23%	4780/9709/4609/3428/22933/8301/2534/6279/3553/7123/80149/7133/10892/114548/4804/152503/3717/65018/255488/1191/10550/120892/83595/2934/10418/355/4067/10010/6280/834/144165/149628/4092/1452/84168/2152/4824/8915/6774/85409/51136/8738/83874/64581/5023/64065/9451/2149/25898/7805/489/27141/6622/444/841/9447/10845/9104/1378/5641/5663/6850/3965/5366/6505/1075/11337/5118/8754/1654/55081/2904/27185/2185/99…
BP	GO:0014909	smooth muscle cell migration	64	0.481283	2.11421	5.26413e-06	5.46145e-05	3.4326e-05	4121	tags=41%, list=16%, signal=34%	1398/3037/4780/9510/10672/4609/5054/7099/6352/55742/1545/596/9353/5031/199/80310/3488/3486/9732/65009/6282/6653/5327/10092/93649/3479
CC	GO:0031261	DNA replication preinitiation complex	10	-0.856381	-2.13498	5.308e-06	5.49242e-05	3.45207e-05	2946	tags=90%, list=12%, signal=79%	51659/84296/64785/4175/4173/4176/4172/4174/4171
CC	GO:0071162	CMG complex	10	-0.856381	-2.13498	5.308e-06	5.49242e-05	3.45207e-05	2946	tags=90%, list=12%, signal=79%	51659/84296/64785/4175/4173/4176/4172/4174/4171
BP	GO:0010594	regulation of endothelial cell migration	155	0.363821	1.87587	5.3336e-06	5.51163e-05	3.46414e-05	5723	tags=41%, list=23%, signal=32%	9314/4780/5743/388/1634/1969/3091/7057/7010/80149/2658/5547/301/84913/3162/1906/2113/54453/79812/659/2247/9353/4846/5294/6915/23328/306/27286/5176/6678/2013/8828/64218/5606/64094/5641/2625/94/168667/11235/2185/5764/7124/9734/5293/5286/284/6237/7424/147372/55466/23411/6776/634/1647/57381/14/350/10000/387/2246/2249/5797
BP	GO:0001916	positive regulation of T cell mediated cytotoxicity	28	0.646717	2.36664	5.51439e-06	5.69094e-05	3.57684e-05	2908	tags=50%, list=12%, signal=44%	567/912/3133/8417/3594/3134/3106/5788/3122/3136/3593/51561/911/913
BP	GO:0032633	interleukin-4 production	32	0.614352	2.32707	5.59705e-06	5.76107e-05	3.62092e-05	2801	tags=53%, list=11%, signal=47%	942/5588/3133/114548/3662/3556/2207/916/160365/84868/959/2625/9308/6850/3965/8288/940
BP	GO:0032673	regulation of interleukin-4 production	32	0.614352	2.32707	5.59705e-06	5.76107e-05	3.62092e-05	2801	tags=53%, list=11%, signal=47%	942/5588/3133/114548/3662/3556/2207/916/160365/84868/959/2625/9308/6850/3965/8288/940
BP	GO:0071622	regulation of granulocyte chemotaxis	44	0.563179	2.30129	5.75484e-06	5.9157e-05	3.71811e-05	5123	tags=61%, list=20%, signal=49%	6363/6366/728/7057/1436/6352/1236/719/1906/59341/5880/9353/6504/708/972/3565/1240/4354/51561/64127/3071/83700/3929/683/7130/57402/1803
BP	GO:1901988	negative regulation of cell cycle phase transition	199	-0.377684	-1.7713	5.8519e-06	6.0076e-05	3.77586e-05	2954	tags=28%, list=12%, signal=25%	55055/55159/9344/11200/5591/1112/60561/9656/146956/51720/29935/51343/5933/2177/4436/51514/1111/5514/1763/11130/4221/65123/5883/54962/9319/7756/835/56658/55755/4085/672/699/26271/4193/8914/7272/80279/84126/891/144455/990/81620/1063/9212/10403/9735/57551/7517/29980/84936/8563/51512/2146/84861/641/9984
MF	GO:0023026	MHC class II protein complex binding	26	0.666686	2.40327	5.86323e-06	6.01135e-05	3.77822e-05	2507	tags=54%, list=10%, signal=49%	975/567/3125/920/3117/972/3113/3119/931/3115/3122/3111/311/3126
BP	GO:0042509	regulation of tyrosine phosphorylation of STAT protein	74	0.4627	2.10764	5.96101e-06	6.09564e-05	3.8312e-05	5014	tags=45%, list=20%, signal=36%	9021/3572/3569/2534/3059/1436/6352/3717/7132/3600/3280/4067/8651/116379/3596/3565/3593/2322/23529/51561/59067/3263/7124/3479/5008/2056/2690/3458/3976/857/10019/10464/5007
BP	GO:0006402	mRNA catabolic process	192	-0.379186	-1.77095	5.9594e-06	6.09564e-05	3.8312e-05	4184	tags=36%, list=17%, signal=30%	79048/4116/4292/9698/22916/23369/1869/10140/196513/6832/23019/79675/1660/8087/2332/114609/373863/9775/54542/167227/9887/131870/56478/3182/23644/79072/9924/4686/2521/23112/10922/27327/4848/8570/5433/10642/51154/5976/27044/328/23381/65110/3192/10921/57819/23404/65109/22794/90806/57472/131405/9704/8148/4343/9238/25904/56339/25804/55095/54915/6499/5578/26019/80153/91875/4849/8241/23367/7186
BP	GO:1903707	negative regulation of hemopoiesis	97	0.421376	2.006	5.97624e-06	6.10324e-05	3.83598e-05	3338	tags=38%, list=13%, signal=33%	4609/3659/3398/864/10875/80149/7099/301/6422/7001/714/4067/3635/2737/4092/7098/8651/10272/972/9935/325/3565/3902/7107/11025/28959/2213/1378/1021/149041/1493/3142/55365/865/10234/6348/11006
BP	GO:0006067	ethanol metabolic process	21	0.709132	2.38831	6.07287e-06	6.19386e-05	3.89293e-05	2395	tags=48%, list=10%, signal=43%	27284/125/128/126/219/127/6783/130/217/124
MF	GO:0003684	damaged DNA binding	62	-0.524909	-2.08321	6.32239e-06	6.43159e-05	4.04235e-05	6368	tags=55%, list=25%, signal=41%	11201/2068/56852/5111/2033/7486/7158/5810/11284/55247/3148/5932/8450/2547/4595/9937/7515/1642/54840/328/4436/1387/2189/7374/672/64421/9401/2956/2237/2071/5424/10721/6996/641
BP	GO:0000723	telomere maintenance	115	-0.44077	-1.92189	6.32049e-06	6.43159e-05	4.04235e-05	4905	tags=41%, list=19%, signal=33%	55869/11284/7874/225689/8550/135458/545/167227/1736/50485/5889/2547/7203/3326/9937/7515/5591/8658/51750/286053/6714/5976/328/5514/142/1763/23381/55226/9156/3192/4751/24144/10111/4216/64421/9401/9894/898/2237/10575/5981/54552/9212/7517/9134/641/80119
BP	GO:0016072	rRNA metabolic process	196	-0.380957	-1.78293	6.38022e-06	6.48201e-05	4.07404e-05	5464	tags=40%, list=22%, signal=32%	55272/10248/23223/84172/9330/2971/79050/11103/2091/23481/11224/10521/55636/27043/11137/90121/10799/10438/6201/317781/84128/6227/6155/6597/55164/9277/9775/25926/25983/10927/131870/117246/10199/285855/1736/10885/79954/23560/79039/64963/5591/55661/29777/51547/54555/9136/23195/153443/5303/54663/81887/51154/10360/10607/55226/55813/23076/23404/1663/2976/4931/113000/79707/65083/2972/54606/79922/6598/270…
BP	GO:0006271	DNA strand elongation involved in DNA replication	14	-0.799633	-2.21179	6.39883e-06	6.49249e-05	4.08063e-05	3627	tags=86%, list=14%, signal=73%	54107/10714/5426/1763/4173/4176/5983/5984/4172/3978/5422/3980
BP	GO:0140053	mitochondrial gene expression	81	-0.482395	-2.00794	6.41792e-06	6.50344e-05	4.08751e-05	7274	tags=54%, list=29%, signal=39%	51069/6472/85476/283459/54460/5442/55005/80222/63899/57570/5562/57038/54802/64951/10102/64960/7284/51373/6832/79675/54938/6150/133522/79072/6183/6182/55168/64963/51116/10922/92170/55278/51654/23107/55037/23395/4528/124454/55157/64863/9238/80324/51021/10128
MF	GO:1901681	sulfur compound binding	234	0.324151	1.77884	6.5921e-06	6.6713e-05	4.19301e-05	5726	tags=38%, list=23%, signal=30%	9510/83716/6402/7057/7123/84870/79690/6372/2639/27010/6422/6368/56925/6403/59352/1839/5788/33/1842/5048/6288/2950/2247/9353/11167/5023/27232/2947/8828/5095/7049/2160/6342/5549/51144/64094/1809/53354/6359/5306/5553/5091/5118/6649/37/4753/4329/6146/30008/5764/1622/64388/7058/7172/4018/3075/151887/64746/1289/3990/351/1305/2200/91452/55753/4043/284654/51156/3627/26281/3918/5196/10457/149998/5046/9152…
BP	GO:0048708	astrocyte differentiation	74	0.460938	2.09961	6.62952e-06	6.69188e-05	4.20595e-05	4714	tags=46%, list=19%, signal=37%	2358/3572/3569/728/3398/3949/10319/6279/3553/7099/5604/3280/3459/6280/6774/3845/10100/712/30812/7431/4920/1021/5080/5663/23529/3400/1600/7124/351/3458/3976/2670/3913/6886
MF	GO:0004842	ubiquitin-protein transferase activity	367	-0.33092	-1.65467	6.62614e-06	6.69188e-05	4.20595e-05	4351	tags=30%, list=17%, signal=25%	253980/1161/26190/9903/90293/51366/391714/7267/7681/117584/10293/55743/83737/54542/147339/80829/93611/148066/10107/57534/8945/378884/257218/84246/143279/8925/27339/90933/65264/23608/9616/81786/23291/55159/84231/149603/727800/9690/10193/84133/26262/7737/54476/51239/29128/80204/7322/89910/26263/23295/9666/23609/22954/80196/10616/4591/64777/54880/7332/4734/153769/7706/7337/6015/51514/26261/55298/772…
BP	GO:0050858	negative regulation of antigen receptor-mediated signaling pathway	31	0.624922	2.35979	6.68929e-06	6.73486e-05	4.23296e-05	3928	tags=55%, list=16%, signal=46%	26191/1997/11314/5621/79037/2633/84174/4068/9404/56940/11126/7805/3958/2213/115352/11006/868
BP	GO:0150077	regulation of neuroinflammatory response	31	0.624651	2.35877	6.68929e-06	6.73486e-05	4.23296e-05	4121	tags=61%, list=16%, signal=51%	5743/3569/3949/3553/7133/8530/90865/5336/120892/5788/3565/4317/1075/6348/7124/472/23208/4314/3479
MF	GO:0001968	fibronectin binding	28	0.642785	2.35225	6.76109e-06	6.79841e-05	4.2729e-05	5251	tags=61%, list=21%, signal=48%	7057/3489/3676/1520/10272/59339/3488/51144/3486/1513/3675/11006/4018/151887/4313/7130/3685
CC	GO:0031093	platelet alpha granule lumen	64	0.477569	2.0979	6.80572e-06	6.83451e-05	4.29559e-05	6158	tags=47%, list=24%, signal=35%	5552/2/710/7057/22915/1675/5054/5768/1191/3671/7043/6678/10490/7076/2621/5627/3082/12/2162/83706/3479/351/7424/78991/5196/2243/2244/7042/5005/5340
BP	GO:0032753	positive regulation of interleukin-4 production	25	0.663731	2.38501	6.8225e-06	6.84259e-05	4.30067e-05	2801	tags=64%, list=11%, signal=57%	942/5588/3133/114548/3662/3556/2207/916/160365/84868/959/2625/6850/3965/8288/940
BP	GO:1902622	regulation of neutrophil migration	40	0.561441	2.24897	6.9761e-06	6.9877e-05	4.39187e-05	5123	tags=57%, list=20%, signal=46%	6363/6366/728/4615/1236/3554/719/1906/5880/9353/708/391/972/4354/51561/2529/64127/3071/83700/3929/683/7130/1803
CC	GO:0000151	ubiquitin ligase complex	251	-0.357874	-1.7199	7.12817e-06	7.1309e-05	4.48188e-05	5429	tags=35%, list=22%, signal=28%	126433/25852/1163/56254/9025/57414/26235/7321/115290/8445/23510/79699/118424/55832/23532/122416/6468/92703/59349/253980/1161/9903/90293/2861/64682/10336/9820/8450/93611/55208/8945/26133/84961/84246/7335/51434/9616/23291/54442/84231/84733/8535/1642/11146/26262/51239/1164/80204/7322/8453/550/80012/10616/51343/80028/54880/7332/4734/6015/51514/26261/116138/55070/26267/8216/51433/672/51529/57643/9968/…
BP	GO:0046718	viral entry into host cell	132	0.393578	1.98372	7.2967e-06	7.29018e-05	4.58199e-05	4363	tags=36%, list=17%, signal=30%	1604/4061/1969/975/9023/5359/942/10346/3949/1949/7852/558/8519/8547/2934/339390/920/2219/4684/10332/6504/6520/6609/6404/972/185/325/6614/85363/1508/6554/3383/2060/3695/1378/3965/7405/59272/3694/3416/2621/8692/858/7113/941/3839/857/6737
BP	GO:0035456	response to interferon-beta	27	0.648813	2.34791	7.43239e-06	7.40908e-05	4.65672e-05	5362	tags=67%, list=21%, signal=53%	5359/3659/3428/4938/8519/824/149628/7098/54739/9447/4332/3455/684/6772/3456/10410/997/10581
BP	GO:0097242	amyloid-beta clearance	37	0.588854	2.30849	7.43462e-06	7.40908e-05	4.65672e-05	5535	tags=62%, list=22%, signal=49%	728/8301/3949/4311/8685/718/1191/3459/4481/3565/3689/3416/5868/7124/3684/9230/93649/3480/3458/6093/4043/1213/4035
BP	GO:0030323	respiratory tube development	168	0.347028	1.7997	7.45699e-06	7.42193e-05	4.66479e-05	4681	tags=33%, list=19%, signal=27%	83716/5156/10253/1544/4311/10365/51696/7472/9719/3290/5604/10427/23414/2294/3280/6441/9509/28512/1116/2737/7043/60485/659/2247/4846/3845/6943/7048/3596/64399/2034/2736/7068/3488/2627/10252/10728/10413/26154/3675/3694/998/9618/7124/84525/57333/93649/1281/3976/7482/83931/147372/57493/54206/6909/79977
BP	GO:0010573	vascular endothelial growth factor production	34	0.599036	2.30394	7.51947e-06	7.47462e-05	4.69791e-05	3323	tags=47%, list=13%, signal=41%	5743/3572/3569/728/3091/3553/718/719/1545/57447/729230/55959/9451/10855/6095/7124
BP	GO:0045055	regulated exocytosis	219	0.327501	1.76385	7.72809e-06	7.67226e-05	4.82213e-05	4155	tags=34%, list=17%, signal=28%	8676/695/5730/11314/3162/3134/143425/10125/120892/1393/2294/4067/148/2268/5880/23621/5294/11031/640/22999/10972/306/3596/5023/729230/11151/5724/57586/6622/8723/3565/8773/84106/5341/2213/8867/9381/5663/8832/6814/6850/3965/11069/26154/3055/3598/107/9341/6844/201294/3689/6688/5868/55503/6348/83849/26056/4818/6284/3684/9230/9501/80223/5873/23208/5293/5906/1142/8911/5532/6845/150/3071/2771
MF	GO:0004866	endopeptidase inhibitor activity	163	0.353568	1.82365	7.88981e-06	7.8229e-05	4.91681e-05	4919	tags=35%, list=20%, signal=28%	2/710/1471/5271/7980/5054/8530/939/5272/5621/831/25816/1992/718/56925/9806/7078/5858/5176/51232/6694/5918/5267/256394/58189/6622/10653/128488/329/7079/684/7076/5055/199713/10935/2621/5627/720/10406/8434/12/721/6590/643394/112401/4018/1285/259/351/4803/10879/6093/3700/1470/51156/866/26998
CC	GO:0071005	U2-type precatalytic spliceosome	46	-0.573933	-2.13352	7.9964e-06	7.91855e-05	4.97693e-05	5043	tags=54%, list=20%, signal=44%	83443/153527/10907/84950/6633/10262/6629/23524/6627/7737/6628/9128/6634/6636/8449/8175/57819/6635/10992/10946/9129/26121/6637/9343/25804
CC	GO:0042575	DNA polymerase complex	17	-0.748482	-2.20414	8.12507e-06	8.03581e-05	5.05063e-05	4037	tags=65%, list=16%, signal=54%	5558/54108/54107/10714/5557/5426/5427/4172/5424/5422/23649
BP	GO:0007254	JNK cascade	161	0.354434	1.82678	8.19781e-06	8.09753e-05	5.08942e-05	4493	tags=38%, list=18%, signal=31%	5734/6363/26191/6366/7164/9611/3553/9770/85458/6386/653361/4616/7099/4615/939/8600/1540/1236/6422/65018/10125/120892/80824/59341/5048/5609/2950/7098/148170/29969/6504/7189/6416/56940/2047/51339/11184/5602/51562/4920/4317/2213/4055/10114/5187/998/2185/9618/4790/140885/7124/9459/9821/64127/3480/259/351/51284/5599/51347/4294
BP	GO:0046916	cellular transition metal ion homeostasis	105	0.401015	1.94263	8.41452e-06	8.30112e-05	5.21738e-05	3008	tags=31%, list=12%, signal=28%	1318/4499/4502/4493/4494/4609/3091/6279/4501/654/2658/4489/5621/2395/79901/79689/3162/6341/57817/7779/6280/30061/4495/64116/9843/1356/4496/23479/2495/6505/6556/286133/3263
BP	GO:0090303	positive regulation of wound healing	49	0.533915	2.22445	8.5547e-06	8.4288e-05	5.29763e-05	4082	tags=37%, list=16%, signal=31%	4780/7056/7057/7852/5054/301/7001/1839/2152/6915/64581/2149/64094/10855/4638/1361/150/71
BP	GO:0010569	regulation of double-strand break repair via homologous recombination	50	-0.556478	-2.10644	8.62417e-06	8.48657e-05	5.33394e-05	4779	tags=52%, list=19%, signal=42%	151987/56154/196528/8607/5932/2187/86/64110/6944/2521/51750/23126/56893/1111/142/63979/29072/10635/55929/8914/54799/57634/10902/10721/9400/8295
BP	GO:0031023	microtubule organizing center organization	115	-0.436111	-1.90157	8.84865e-06	8.69655e-05	5.46591e-05	4003	tags=36%, list=16%, signal=30%	9371/6566/3834/80254/163786/84612/124093/23291/116840/54875/4957/11190/25914/22995/4591/284403/3832/1111/55968/55226/4751/2801/1070/55835/55722/55755/10733/6491/7840/672/9793/55125/585/10403/1639/7517/10432/29901/7514/899/6790
BP	GO:0033628	regulation of cell adhesion mediated by integrin	45	0.53706	2.20814	9.11648e-06	8.94854e-05	5.62429e-05	4465	tags=49%, list=18%, signal=40%	1398/6366/1969/64805/5054/6352/1545/8631/4067/80173/9404/5294/916/6850/8754/5140/83706/3071/23075/83700/3976/6591
BP	GO:2000779	regulation of double-strand break repair	80	-0.483144	-2.0047	9.18421e-06	9.00374e-05	5.65899e-05	4846	tags=44%, list=19%, signal=35%	11284/151987/56154/196528/8607/5932/51366/2187/86/84309/64110/6944/2521/5591/51547/51750/23126/56893/1111/142/63979/29072/24144/1663/84501/10635/55929/8914/54799/2305/57634/10902/10721/9400/8295
BP	GO:1903311	regulation of mRNA metabolic process	237	-0.362936	-1.73631	9.52483e-06	9.326e-05	5.86153e-05	5707	tags=37%, list=23%, signal=29%	3178/129563/11340/29896/55147/79048/4116/56254/6829/4292/10914/9698/22916/23369/10768/1869/23144/10140/196513/10521/23019/79675/1660/8087/2332/55677/114609/373863/9775/54542/167227/10262/22827/56478/3182/27339/3191/904/79072/9924/4686/2521/23112/7072/10922/11052/27327/4848/6732/8570/5433/10642/29890/5976/328/79810/11338/6830/3192/10921/23404/55796/22794/90806/55225/57472/26576/131405/9704/580/814…
BP	GO:0044774	mitotic DNA integrity checkpoint signaling	71	-0.503634	-2.04803	9.63821e-06	9.42523e-05	5.9239e-05	2878	tags=38%, list=11%, signal=34%	55159/9344/11200/5591/1112/60561/9656/146956/51720/51343/2177/4436/51514/1111/5514/5883/54962/835/56658/672/4193/80279/990/57551/29980/51512/641
BP	GO:0071677	positive regulation of mononuclear cell migration	64	0.473511	2.08007	9.66521e-06	9.43985e-05	5.93308e-05	3323	tags=41%, list=13%, signal=35%	2358/6366/6387/5054/81704/1230/6352/1236/3676/6504/708/729230/199/80310/3958/3565/5641/961/3965/2185/6688/245937/2621/58494/6348/7124
BP	GO:0009451	RNA modification	115	-0.435107	-1.89719	9.6923e-06	9.45452e-05	5.9423e-05	6305	tags=43%, list=25%, signal=32%	26610/63899/57570/63892/79872/54802/83448/56931/55140/103/11062/2091/80745/9836/55621/144233/131870/117246/55798/54901/3182/1736/56257/126789/285605/27304/29890/8731/51654/55226/54522/54517/64118/113000/64863/79922/127253/27079/10785/51726/84267/80324/11180/56339/6894/55695/55687/84705/81605
BP	GO:0010498	proteasomal protein catabolic process	425	-0.316526	-1.60277	9.77777e-06	9.52603e-05	5.98725e-05	6041	tags=36%, list=24%, signal=27%	143471/51377/5702/57761/122809/10273/6815/8312/64795/51667/10206/5689/1453/4287/126433/25852/5720/92305/57414/26235/9575/115290/130617/4983/5566/23510/7874/79699/1017/118424/6469/23532/122416/6468/25831/23198/253980/1161/114881/9097/81502/2332/90637/64682/8473/117584/55743/6599/83737/2932/5695/8450/1454/821/5714/93611/8945/9024/378884/26133/11124/84961/27339/55741/5710/51434/5687/5693/10197/10869…
BP	GO:0097305	response to alcohol	224	0.319399	1.74012	9.79612e-06	9.53205e-05	5.99103e-05	3323	tags=27%, list=13%, signal=24%	2354/2353/5732/5734/6363/6366/2/4609/10365/2534/6279/1621/939/1571/6916/54658/5999/1236/6422/706/1545/1393/595/1536/5997/57817/3490/9353/847/6915/7048/3596/54331/5031/1080/11184/929/7049/8061/130/2059/841/210/6554/329/6648/2625/5020/107/1066/5741/18/2904/2230/2185/687/4255/4129/978/6348/7124
BP	GO:0031667	response to nutrient levels	406	0.268746	1.54334	9.92924e-06	9.6496e-05	6.06492e-05	4993	tags=31%, list=20%, signal=25%	7538/81631/4780/5743/4982/2/3428/22933/133/3949/7071/80149/22856/54407/467/2308/5443/54658/11170/23710/5292/6422/3162/706/3600/1545/8942/10999/51100/120892/11345/1592/595/355/220441/1536/3485/57817/59341/596/590/3920/411/659/8915/29103/847/6915/2350/4149/7048/249/583/9451/6716/27141/54361/4330/81788/6344/594/4131/9706/210/6715/6554/6648/5166/5289/9227/5366/5020/11337/340024/7484/1543/6652/38/6546…
BP	GO:0060759	regulation of response to cytokine stimulus	141	0.371612	1.89742	9.95095e-06	9.65871e-05	6.07064e-05	3177	tags=30%, list=13%, signal=27%	9314/59307/3569/837/5516/3665/11213/3091/64135/81030/7852/1893/558/7099/6352/1540/4938/7850/7132/3554/1906/83643/5788/28512/834/5048/2950/9353/8651/7837/972/7097/7294/3557/7805/841/6850/114900/2672/7376/3263/2621/7128
BP	GO:0034121	regulation of toll-like receptor signaling pathway	66	0.472859	2.08676	1.02246e-05	9.91207e-05	6.22989e-05	5736	tags=53%, list=23%, signal=41%	26191/3665/11213/3659/57142/11314/3662/2099/23547/4067/7098/7096/91543/7097/11027/329/2672/1654/115352/338382/7128/57162/409/64127/3929/857/54726/10333/1535/56927/54106/9867/55366/4057/7100
BP	GO:0030278	regulation of ossification	106	0.397208	1.92412	1.0303e-05	9.93887e-05	6.24673e-05	5799	tags=43%, list=23%, signal=34%	1959/5552/5734/3091/1893/654/22856/92/1230/240/4091/6422/596/4092/7043/659/4256/54361/166929/5020/6546/5741/860/796/2185/338773/5764/6348/4958/154/55589/90/8074/2824/7704/4146/2697/10736/6869/5087/26585/7042/4057/650/1432/130497
MF	GO:0042277	peptide binding	284	0.297966	1.66394	1.02883e-05	9.93887e-05	6.24673e-05	4601	tags=30%, list=18%, signal=25%	2358/1471/8301/3949/4311/7433/912/3133/4889/7099/5621/4804/8685/3134/10148/10288/1910/3106/1191/3125/10268/1393/590/23621/30061/5530/10332/7096/3117/847/712/4481/26953/972/7097/5970/774/3113/4883/2947/1410/929/6344/3107/3119/3115/2028/3122/3136/8315/5204/25907/2213/9452/2346/1240/1889/321/5480/83941/911/2904/913/29928/3689/3416/2890/6653/3684/154/1396/1394/23428/64127/90/3480/3929/3839/2690/2740/…
BP	GO:0032970	regulation of actin filament-based process	342	0.280814	1.60543	1.02898e-05	9.93887e-05	6.24673e-05	4516	tags=29%, list=18%, signal=24%	1398/390/203228/5734/388/5156/3397/6366/5142/6387/7010/8826/9535/22998/4908/5144/85458/1902/3059/1436/91663/5999/11170/1236/6422/4070/1906/287/2934/7111/90102/5880/7043/22899/2042/9353/2314/148170/1265/27236/7454/10435/5066/23647/391/23406/23191/8477/11034/11151/54361/9639/2059/9873/5341/51225/27/961/10602/119/29109/5216/6369/3055/684/10174/6548/10095/998/2258/11346/2044/2185/5756/123016/26999/23…
BP	GO:0010563	negative regulation of phosphorus metabolic process	364	0.27956	1.60337	1.02907e-05	9.93887e-05	6.24673e-05	5186	tags=33%, list=21%, signal=27%	9021/3725/203228/26191/23645/64092/10253/11213/9611/22933/8826/3553/2022/4908/5144/9770/80149/4616/91663/11314/5621/143941/245928/54386/4091/6422/11117/5787/26051/79705/120892/1848/55022/5788/83891/57732/4067/5997/80824/54900/4092/2950/2646/9353/6774/8651/90007/6609/56940/25937/5783/6622/3958/9467/113791/10252/5341/5343/9104/1027/5925/26524/5080/5663/10114/3486/376497/343035/6546/2203/6456/801/32…
BP	GO:1903035	negative regulation of response to wounding	82	0.441778	2.03532	1.03164e-05	9.93954e-05	6.24715e-05	6235	tags=51%, list=25%, signal=39%	1398/114897/5156/7056/710/7057/22915/5054/240/1906/90102/2247/4846/89790/928/325/58189/54361/2160/6558/18/5055/58529/5627/7124/5327/7103/1361/5728/2811/3848/10019/634/2191/2243/55966/350/2244/83481/5270/5340/3818
BP	GO:0045936	negative regulation of phosphate metabolic process	363	0.278312	1.59729	1.05463e-05	0.000101486	6.37853e-05	5186	tags=33%, list=21%, signal=27%	9021/3725/203228/26191/23645/64092/10253/11213/9611/22933/8826/3553/2022/4908/5144/9770/80149/4616/91663/11314/5621/143941/245928/54386/4091/6422/11117/5787/26051/79705/120892/1848/55022/5788/83891/57732/4067/5997/80824/54900/4092/2950/2646/9353/6774/8651/90007/6609/56940/25937/5783/6622/3958/9467/113791/10252/5341/5343/9104/1027/5925/26524/5080/5663/10114/3486/376497/343035/6546/2203/6456/801/32…
BP	GO:1903036	positive regulation of response to wounding	60	0.492611	2.14979	1.05808e-05	0.000101692	6.39152e-05	4101	tags=37%, list=16%, signal=31%	4780/7056/7057/7852/5054/301/7001/1839/2152/6915/64581/2149/64094/10855/4638/81565/5764/2316/1361/150/71/3480
BP	GO:0045953	negative regulation of natural killer cell mediated cytotoxicity	19	0.723123	2.34952	1.05954e-05	0.000101708	6.39248e-05	5128	tags=79%, list=20%, signal=63%	1398/3133/5272/3134/3106/3821/3824/84868/3965/3805/387837/409/100507436/634/3105
BP	GO:0007200	phospholipase C-activating G protein-coupled receptor signaling pathway	93	0.427652	2.01733	1.07125e-05	0.000102581	6.44737e-05	3201	tags=31%, list=13%, signal=27%	2357/2358/728/64805/1902/27334/9630/3357/2099/2359/719/1906/1910/7052/148/2841/147/8477/5031/185/4883/2854/2149/2769/1240/796/286530/2915/5330
BP	GO:0010720	positive regulation of cell development	272	0.295825	1.63243	1.07061e-05	0.000102581	6.44737e-05	4542	tags=29%, list=18%, signal=24%	1398/3037/1959/3572/3569/6387/4609/3398/22933/3091/4311/7852/3553/85458/7472/7133/91663/5604/8600/5583/706/3280/7052/4067/596/2737/4092/5048/659/4739/9353/708/7305/30812/23191/7097/64581/140578/5649/57165/5176/9253/4131/3987/8867/7520/5080/23529/3611/646/170506/1002/201294/998/27185/81565/22938/2915/4915/5764/7124/2803/5789/10507/2316/23405/63950/443/4803/4352/1523/1813/3458/3976/55179/2670/79791…
BP	GO:0000077	DNA damage checkpoint signaling	97	-0.459158	-1.96814	1.08952e-05	0.000104182	6.54801e-05	5532	tags=45%, list=22%, signal=36%	83990/7158/5810/11073/9575/80198/1869/79968/1017/135458/545/80254/25896/27339/55159/9344/11200/5591/1112/60561/9656/146956/51720/29935/51343/2177/4436/51514/1111/5514/5883/54962/835/56658/672/4193/80279/84126/57551/29980/8563/51512/641/9984
BP	GO:0032200	telomere organization	119	-0.429521	-1.88407	1.09063e-05	0.000104182	6.54801e-05	4905	tags=40%, list=19%, signal=33%	55869/11284/7874/225689/8550/135458/545/167227/1736/50485/5889/2547/7203/3326/9937/7515/5591/8658/51750/286053/6714/5976/328/5514/142/1763/23381/55226/9156/3192/4751/24144/10111/4216/64421/9401/9894/898/2237/10575/5981/54552/9212/7517/2146/9134/641/80119
BP	GO:1903522	regulation of blood circulation	234	0.319768	1.75479	1.09283e-05	0.000104265	6.5532e-05	4723	tags=32%, list=19%, signal=27%	5743/5142/133/1621/5144/80149/6916/5999/3717/3781/10060/1906/1910/27345/287/1839/2643/148/6324/5997/30845/1193/4092/659/340481/147/4846/5294/6915/9446/3753/151/5023/2034/140/23493/185/10800/2149/489/7068/1889/5020/6505/9732/6546/59272/6548/796/4634/2258/801/125111/7124/2316/1573/84525/952/7139/150/3741/5318/1813/857/10142/342527/2740/4313/4624/10021/2931/781/6909/775/51086/2697
BP	GO:0051770	positive regulation of nitric-oxide synthase biosynthetic process	17	0.74269	2.292	1.10832e-05	0.000105614	6.63802e-05	4330	tags=76%, list=17%, signal=63%	6347/10135/7099/3717/90865/120892/7097/9590/5606/6772/64127/2208/3458
CC	GO:0101002	ficolin-1-rich granule	176	0.349666	1.83447	1.11088e-05	0.00010573	6.64526e-05	4289	tags=34%, list=17%, signal=28%	2357/2358/83716/6515/1604/1471/9535/10875/1675/11314/5223/5547/240/10288/1520/10549/2934/374403/5799/2219/3920/411/2950/26578/847/116844/5236/55276/80301/2207/23406/55860/3958/11333/965/210/2495/1508/1378/4332/5553/427/5713/6556/1654/3101/3689/978/140885/8987/10092/10159/7414/2992/3071/3848/1828/2720/51071
BP	GO:0006268	DNA unwinding involved in DNA replication	20	-0.72251	-2.21806	1.12267e-05	0.000106721	6.7076e-05	2946	tags=65%, list=12%, signal=57%	3159/51659/84296/64785/4175/4173/4176/9401/4172/4174/4171/9400/641
BP	GO:0050857	positive regulation of antigen receptor-mediated signaling pathway	19	0.721876	2.34546	1.1533e-05	0.0001095	6.88226e-05	2233	tags=53%, list=9%, signal=48%	975/10666/1236/5583/5788/50852/8915/5970/84433/3783
BP	GO:0032259	methylation	255	-0.355798	-1.71181	1.18849e-05	0.000112705	7.08369e-05	5093	tags=38%, list=20%, signal=31%	51409/57570/63892/55124/79872/10322/438/23067/359787/2641/56254/346171/64754/9718/3720/56981/9463/56154/2091/80745/9836/55621/11137/144233/26147/51108/8473/10919/59336/55677/4801/117246/55798/26053/56341/23476/55251/10196/56257/56980/11022/84274/9219/10419/6628/79813/51547/80204/11105/51805/63925/4802/6634/29890/23168/54880/64324/8731/142/1387/29104/29072/4221/6830/10155/1786/7298/53615/64863/305…
BP	GO:0042572	retinol metabolic process	47	0.533487	2.20538	1.212e-05	0.000114796	7.21507e-05	5485	tags=57%, list=22%, signal=45%	1544/220/1576/1545/125/126/54884/127/5959/1562/130/9227/124/8228/1543/1558/10170/1551/8608/57104/1565/57665/51635/1577/145226/151056/5950
BP	GO:0045446	endothelial cell differentiation	97	0.412644	1.96443	1.26538e-05	0.000119707	7.52376e-05	4627	tags=36%, list=18%, signal=30%	3397/25932/7852/3553/55273/5144/3084/654/2658/91663/4615/84913/7132/1910/26051/5138/659/340481/11167/23493/2947/5175/10855/7075/3383/94/7124/7414/83605/5906/90/64321/6093/2116/57493
BP	GO:0050000	chromosome localization	66	-0.499504	-2.00907	1.29399e-05	0.000121971	7.66607e-05	2200	tags=35%, list=9%, signal=32%	81930/3837/150465/10726/27436/55166/3192/9928/11004/10615/83540/81610/1062/891/81620/113130/1063/9212/10403/3619/55143/3833/8697
BP	GO:0034728	nucleosome organization	75	-0.48593	-2.00275	1.29399e-05	0.000121971	7.66607e-05	5778	tags=55%, list=23%, signal=42%	10036/8888/1616/9025/64061/10847/64754/3148/196528/23198/50809/6046/3159/401541/83743/6597/6599/54108/54107/257218/9733/6605/6944/4676/11339/64431/23234/6601/6749/8289/29072/6830/6598/8208/55929/4678/6602/4171/55723/55355/11198
BP	GO:0090066	regulation of anatomical structure size	433	0.262811	1.52405	1.29238e-05	0.000121971	7.66607e-05	4490	tags=28%, list=18%, signal=23%	5743/6366/23645/6387/8301/133/10365/3575/1621/10439/3059/91663/57142/6916/1236/3357/1906/1910/1808/27345/120892/2934/7111/2643/148/5997/59341/2296/5048/83547/659/340481/147/9353/4846/2314/148170/6915/3778/5910/7454/10435/358/23406/23191/151/5023/23038/11034/185/10800/11151/4883/2149/6560/64218/6344/4131/2059/9706/80852/6558/3783/9873/5341/6648/10602/119/1889/5216/7484/9732/6369/3055/6649/6546/592…
MF	GO:0003953	NAD+ nucleosidase activity	28	0.632762	2.31557	1.30107e-05	0.000122491	7.69877e-05	4861	tags=71%, list=19%, signal=58%	9173/59307/7099/4615/8807/8809/3554/55024/3556/118788/7098/7096/51311/7097/81793/952/51284/683/148022/10333
MF	GO:0030414	peptidase inhibitor activity	168	0.34117	1.76933	1.32748e-05	0.000124827	7.84559e-05	4919	tags=35%, list=20%, signal=28%	2/710/1471/5271/7980/5054/8530/939/5272/5621/831/25816/1992/718/56925/9806/7078/5858/5176/51232/6694/5918/5267/256394/58189/6622/10653/128488/329/7079/684/7076/5055/199713/10935/2621/5627/720/10406/8434/12/721/6590/643394/112401/4018/1285/221476/259/351/4803/10879/6093/3700/1470/51156/866/26998
MF	GO:0070577	lysine-acetylated histone binding	21	-0.709459	-2.19734	1.3323e-05	0.000124981	7.85524e-05	4401	tags=62%, list=17%, signal=51%	23198/6046/55023/6597/138474/23476/80764/26009/6872/8805/8019/65980/23613
MF	GO:0140033	acetylation-dependent protein binding	21	-0.709459	-2.19734	1.3323e-05	0.000124981	7.85524e-05	4401	tags=62%, list=17%, signal=51%	23198/6046/55023/6597/138474/23476/80764/26009/6872/8805/8019/65980/23613
BP	GO:0034599	cellular response to oxidative stress	250	0.307137	1.69557	1.3356e-05	0.000125141	7.86528e-05	3337	tags=24%, list=13%, signal=21%	4170/2353/4780/3725/388/5156/3569/695/22933/3091/8575/10365/2534/558/80149/4482/653361/7099/2308/2395/10516/135112/301/240/3717/3162/65018/1906/1545/10550/120892/7001/2643/596/5311/2530/4846/847/358/5970/2034/5151/199/80310/8382/6622/6648/8321/6505/26287/6649/11235/4255/9973/10935/7128/29957/3082/140885/7124/50640
BP	GO:0045926	negative regulation of growth	222	0.317353	1.72361	1.356e-05	0.0001269	7.97584e-05	4723	tags=32%, list=19%, signal=27%	4499/4502/8835/4493/4494/3091/11007/51316/6595/4501/2658/4489/57142/2395/5999/6422/5997/2273/596/60485/659/4495/9353/7048/7490/583/9538/85004/4496/1410/58189/64218/3488/9706/147906/29946/10668/1027/5641/5925/92304/94/684/1654/51379/2487/54910/2203/2258/58529/57556/223117/978/55602/10507/8692/154/10370/734/5728/6494/55840/64321/221476/10512/56920/4881/2931/23677/84289/23411/2697
MF	GO:0003712	transcription coregulator activity	424	-0.315242	-1.5956	1.36734e-05	0.000127809	8.03299e-05	5668	tags=34%, list=23%, signal=27%	5977/10206/2033/88/10001/8202/7158/1616/56254/11036/10847/7789/83637/64710/9149/2002/26145/10140/10629/9426/3148/10521/8607/51053/7089/3065/55758/5932/54531/55249/25/10438/3159/7088/1487/1660/81/6597/10011/6599/23013/8896/10766/51616/86/2023/9792/51188/84246/9500/133522/115098/9439/5715/1653/23476/23309/27005/6605/8535/2521/22913/8464/79039/9219/55749/10419/29777/51547/10915/3728/4848/9794/283149…
BP	GO:0010634	positive regulation of epithelial cell migration	136	0.367415	1.86486	1.37858e-05	0.000128705	8.08933e-05	3009	tags=28%, list=12%, signal=25%	3037/4780/5743/3725/388/3091/7057/7010/80149/57142/301/84913/3162/5336/1906/2113/1839/54453/10982/659/2247/4846/5294/23328/7048/306/27286/6678/8828/57111/5606/64094/5641/2625/5216/8754/3675/2185
BP	GO:0010001	glial cell differentiation	196	0.324538	1.71986	1.39312e-05	0.000129909	8.16495e-05	4422	tags=32%, list=18%, signal=27%	2358/1959/3572/3569/728/3398/22933/3949/10319/6279/7852/3553/3084/7133/7099/5604/1191/3280/4067/4118/3459/6280/2737/2247/6774/3845/10100/712/30812/7097/5649/7431/9639/4664/4920/91137/58158/2250/1021/5080/5663/23529/3611/3400/4665/1600/27242/54587/4915/5764/7124/23405/5728/9948/443/7223/351/6647/56978/3458/3976/23500/2670
MF	GO:0048020	CCR chemokine receptor binding	39	0.566162	2.26113	1.40621e-05	0.000130973	8.23186e-05	6914	tags=62%, list=27%, signal=45%	6347/6363/6366/3716/6352/6368/388372/414062/729230/6349/6359/6369/6348/6772/6362/6367/6361/6360/6355/10344/1672/10563/10850/6376
CC	GO:0070821	tertiary granule membrane	64	0.467082	2.05183	1.41384e-05	0.000131528	8.26671e-05	5465	tags=44%, list=22%, signal=34%	2358/6515/11314/2040/5787/10288/160364/1536/2207/963/5724/8773/961/945/6556/3689/79895/140885/8987/10159/3684/81619/11026/1535/634/966/23601/102
BP	GO:2000377	regulation of reactive oxygen species metabolic process	128	0.372365	1.86019	1.41807e-05	0.000131764	8.28157e-05	5996	tags=50%, list=24%, signal=38%	2358/4780/22933/3091/7057/2534/80149/7099/2308/10516/5547/240/5336/65018/706/1545/7001/55022/2643/596/5880/2950/7305/7048/64581/185/1410/6622/4317/329/6648/84329/6850/59272/3689/2185/7124/9474/3684/5446/5873/4314/3240/2773/2771/6647/683/11035/8837/2309/1182/10333/51181/1535/1647/9263/5159/8678/387/1432/378/384/83875/7498
BP	GO:0051962	positive regulation of nervous system development	244	0.306991	1.68953	1.43957e-05	0.000133603	8.39718e-05	4542	tags=30%, list=18%, signal=25%	1959/3572/3569/6387/4609/3398/3091/4311/7852/3553/85458/7472/7133/5604/5583/706/3556/3280/7052/4067/2737/5048/659/9353/30812/147381/27286/23191/7097/2047/140578/5649/57165/5176/64218/9253/4131/54674/64084/8867/7520/5080/23529/5020/347902/170506/1002/27185/81565/22938/2915/4915/5764/7124/2803/5789/10507/23405/7058/63950/443/9378/4803/57633/1523/1813/3458/3976/55179/2670/79791/26045/7424/23440
BP	GO:0019883	antigen processing and presentation of endogenous antigen	26	0.648059	2.33613	1.46126e-05	0.000135456	8.5136e-05	3410	tags=50%, list=14%, signal=43%	567/912/3133/3134/3106/972/3107/3122/3136/911/913/3416/9474
MF	GO:0019865	immunoglobulin binding	22	0.682277	2.34271	1.46811e-05	0.00013593	8.54343e-05	4326	tags=55%, list=17%, signal=45%	2212/2205/2207/2215/11027/3958/2217/931/2213/259/2209/2208
BP	GO:0046686	response to cadmium ion	56	0.496282	2.12792	1.47345e-05	0.000136264	8.56439e-05	2841	tags=39%, list=11%, signal=35%	2353/3725/4499/4502/4493/4494/1544/4501/653361/4489/5621/3162/1536/7779/4495/847/4496/210/1027/6648/6652/5741
MF	GO:0008395	steroid hydroxylase activity	36	0.585349	2.27202	1.51432e-05	0.000139879	8.79158e-05	4949	tags=64%, list=20%, signal=51%	9023/1544/51302/1571/1576/1545/1562/113612/1559/1555/1549/1543/54905/1593/1558/1548/1551/1573/1582/1565/64816/1577/29785
BP	GO:0001936	regulation of endothelial cell proliferation	120	0.380495	1.88354	1.524e-05	0.000140607	8.83735e-05	2813	tags=28%, list=11%, signal=25%	6347/3725/6387/3091/7057/7010/1893/7472/654/2658/3164/4804/240/3357/84913/3162/3676/26051/1960/79812/8742/659/2247/2152/6774/116844/185/6678/8828/3593/7075/94/6369/11235
CC	GO:0042613	MHC class II protein complex	17	0.735942	2.27118	1.53237e-05	0.000141212	8.8754e-05	4257	tags=71%, list=17%, signal=59%	567/3125/3117/972/3113/3119/3115/3122/3111/3126/3109/3112
BP	GO:0033559	unsaturated fatty acid metabolic process	103	0.393508	1.90501	1.54752e-05	0.000142441	8.9526e-05	5034	tags=42%, list=20%, signal=34%	5743/1544/3553/5730/1571/6916/301/240/7132/1906/1545/8529/158584/2950/5740/1562/113612/972/284541/1559/1555/60481/6342/9373/1549/10728/1543/79966/1558/1548/5742/50640/1573/51/1565/11343/30/57406/23411/242/29785/10464/8824
BP	GO:0019373	epoxygenase P450 pathway	18	0.72263	2.29748	1.5513e-05	0.000142622	8.96398e-05	3431	tags=67%, list=14%, signal=58%	1544/1571/1545/8529/1562/1559/1555/1549/1543/1558/1548/1573
BP	GO:0043434	response to peptide hormone	369	0.274569	1.57119	1.55879e-05	0.000143142	8.99669e-05	5078	tags=32%, list=20%, signal=26%	9021/1398/1958/1959/4780/5743/3716/8835/5588/6387/4609/133/3553/3164/2308/5443/51762/301/3717/353/1906/23484/1910/1545/10999/7832/677/1393/55022/51141/1536/4067/6775/59341/5791/847/6774/4149/5872/8651/11031/8615/23191/7097/5970/760/23038/185/6716/7049/3488/4131/896/6715/1027/5166/79746/5925/3727/6814/5020/7079/376497/6844/7076/2529/6548/2203/5140/81565/3416/55625/6653/4790/55777/5105/5327/9734/10…
BP	GO:0097048	dendritic cell apoptotic process	10	0.841124	2.21325	1.59237e-05	0.000145884	9.16901e-05	3174	tags=90%, list=13%, signal=79%	6363/6366/6387/558/1236/4067/640/3965/2621
BP	GO:2000668	regulation of dendritic cell apoptotic process	10	0.841124	2.21325	1.59237e-05	0.000145884	9.16901e-05	3174	tags=90%, list=13%, signal=79%	6363/6366/6387/558/1236/4067/640/3965/2621
BP	GO:0044773	mitotic DNA damage checkpoint signaling	68	-0.496986	-2.00945	1.60779e-05	0.000147124	9.24695e-05	2878	tags=38%, list=11%, signal=34%	55159/9344/11200/5591/1112/60561/9656/146956/51720/51343/2177/4436/51514/1111/5514/5883/54962/835/56658/672/4193/80279/57551/29980/51512/641
BP	GO:0010575	positive regulation of vascular endothelial growth factor production	28	0.626879	2.29405	1.62874e-05	0.000148694	9.34564e-05	2845	tags=46%, list=11%, signal=41%	5743/3572/3569/728/3091/3553/718/719/1545/55959/9451/10855/6095
MF	GO:0031491	nucleosome binding	46	-0.565661	-2.10277	1.62819e-05	0.000148694	9.34564e-05	4482	tags=48%, list=18%, signal=39%	5928/3065/50809/6597/6599/86/6605/4676/9219/64431/1104/8028/6601/6749/8289/6830/1108/53615/6598/23523/11198/10038
BP	GO:0000212	meiotic spindle organization	14	-0.785784	-2.17348	1.65028e-05	0.000150485	9.45819e-05	2782	tags=71%, list=11%, signal=64%	5518/2801/259266/26271/9700/27175/10403/7283/9133/6790
BP	GO:0032874	positive regulation of stress-activated MAPK cascade	119	0.382902	1.89692	1.66237e-05	0.000151411	9.51641e-05	3514	tags=34%, list=14%, signal=29%	6363/6366/7164/3553/9770/85458/80149/6386/653361/4616/7099/4615/939/8600/3489/1236/10125/10550/9464/59341/5609/7098/23328/6504/7189/64581/56940/51562/4317/2213/4055/11235/54910/998/2185/6688/9618/4281/7124/9821
BP	GO:0014910	regulation of smooth muscle cell migration	57	0.495417	2.1379	1.67066e-05	0.000151989	9.55274e-05	3214	tags=37%, list=13%, signal=32%	1398/3037/4780/9510/10672/4609/5054/7099/6352/1545/596/9353/5031/199/80310/3488/3486/9732/65009/6282/6653
BP	GO:0031123	RNA 3'-end processing	83	-0.470203	-1.96371	1.68256e-05	0.000152717	9.59848e-05	6840	tags=55%, list=27%, signal=40%	1477/51010/91746/55520/3297/7884/55656/11340/51728/56254/6829/10914/22916/10768/23144/29894/2091/80789/8189/55511/6832/389421/6227/57508/25896/1736/904/55339/4686/51692/11052/1479/5433/64852/134353/23404/1478/580/9810/123169/81608/10898/25888/6626/26173/26024
BP	GO:0006401	RNA catabolic process	229	-0.360189	-1.72457	1.68199e-05	0.000152717	9.59848e-05	4184	tags=31%, list=17%, signal=26%	6832/389421/23019/79675/1660/8087/2332/114609/373863/9775/54542/167227/9887/131870/56478/3182/1736/23644/79072/9924/4686/2521/23112/10922/27327/4848/54555/8570/5433/10642/51154/246243/5976/27044/328/10535/1763/23381/65110/55596/3192/10921/57819/23404/65109/22794/90806/57472/131405/9704/8148/2237/4343/9238/25904/56339/25804/55095/54915/10128/6499/115752/5578/26019/80153/91875/4849/8241/23367/7186
BP	GO:0030856	regulation of epithelial cell differentiation	130	0.376455	1.89378	1.68809e-05	0.000153042	9.61892e-05	4736	tags=35%, list=19%, signal=29%	7538/23764/3397/10253/3553/55273/5054/654/2658/81537/84913/5583/7132/677/3280/595/2296/8842/340481/2247/3596/23493/25937/10252/1027/10413/5080/2625/94/7484/26154/2487/7124/58495/7414/7421/6772/360/3458/3976/857/6093/2116/54206/79977/2668
BP	GO:0007131	reciprocal meiotic recombination	45	-0.555702	-2.05383	1.70706e-05	0.000154404	9.70455e-05	5906	tags=56%, list=23%, signal=43%	164045/5885/83990/4438/4292/80198/317761/27030/5889/8438/84057/11144/11105/146956/11077/25788/29893/2177/116138/9319/10111/10635/80010/7153/4439
BP	GO:0140527	reciprocal homologous recombination	45	-0.555702	-2.05383	1.70706e-05	0.000154404	9.70455e-05	5906	tags=56%, list=23%, signal=43%	164045/5885/83990/4438/4292/80198/317761/27030/5889/8438/84057/11144/11105/146956/11077/25788/29893/2177/116138/9319/10111/10635/80010/7153/4439
BP	GO:0051092	positive regulation of NF-kappaB transcription factor activity	147	0.357875	1.8288	1.71477e-05	0.000154923	9.73715e-05	5579	tags=41%, list=22%, signal=32%	11213/5588/10346/695/6279/3553/10892/114548/7099/4615/8807/8600/6283/8809/54386/5583/5336/3556/1191/6280/7098/8915/847/6774/8717/7189/7097/64581/5970/959/9447/84433/85363/3965/89870/338382/49860/1491/10935/7124/92140/64127/8986/351/54101/857/6737/28232/11035/8837/64170/148022/10333/3551/55223/54106/26585/4922/121268/367
BP	GO:0051303	establishment of chromosome localization	65	-0.5047	-2.02688	1.73353e-05	0.000156437	9.83228e-05	2200	tags=35%, list=9%, signal=32%	81930/3837/150465/10726/27436/55166/3192/9928/11004/10615/83540/81610/1062/891/81620/113130/1063/9212/10403/3619/55143/3833/8697
BP	GO:0045637	regulation of myeloid cell differentiation	170	0.344115	1.79393	1.73839e-05	0.000156695	9.84854e-05	5078	tags=39%, list=20%, signal=31%	7538/2353/3665/4609/3398/3091/567/7071/9770/3059/2124/7099/92/8600/1230/6422/2113/677/714/4067/920/3635/7098/6774/7305/10272/7189/972/9935/325/3565/7107/841/4920/3593/11025/1021/5925/51561/338382/2185/6688/10234/6348/1441/7124/11006/8861/3707/6772/9607/3071/2200/169200/4352/3458/3976/8772/2309/7704/6886/8111/7130/8451/5196/634
BP	GO:0018022	peptidyl-lysine methylation	94	-0.459612	-1.95904	1.75269e-05	0.000157441	9.89537e-05	3971	tags=37%, list=16%, signal=31%	11137/26147/8473/10919/55677/4801/26053/23476/79813/11105/63925/4802/23168/54880/64324/29104/29072/4221/6830/1786/3054/672/6598/4800/90780/10445/6839/30827/1789/2146/11091/9869/54554/22976/9739
BP	GO:0034968	histone lysine methylation	94	-0.459612	-1.95904	1.75269e-05	0.000157441	9.89537e-05	3971	tags=37%, list=16%, signal=31%	11137/26147/8473/10919/55677/4801/26053/23476/79813/11105/63925/4802/23168/54880/64324/29104/29072/4221/6830/1786/3054/672/6598/4800/90780/10445/6839/30827/1789/2146/11091/9869/54554/22976/9739
BP	GO:0044409	entry into host	138	0.36817	1.86816	1.75203e-05	0.000157441	9.89537e-05	3174	tags=30%, list=13%, signal=26%	1604/4061/1969/975/9023/5359/942/10346/3949/1949/7852/558/8519/8547/2934/339390/920/2219/4684/10332/6504/6520/6609/6404/972/185/325/6614/85363/1508/6554/3383/2060/3695/1378/3965/7405/59272/3694/3416/2621
BP	GO:0045428	regulation of nitric oxide biosynthetic process	53	0.50889	2.17194	1.77187e-05	0.000158982	9.99223e-05	4861	tags=49%, list=19%, signal=40%	9314/5743/10365/3553/80149/7099/3717/706/1906/1191/5311/5740/64581/199/4317/9104/6648/961/2185/140885/7124/64902/3458/857/148022/10333
BP	GO:0030324	lung development	164	0.346175	1.78533	1.78961e-05	0.000160389	0.000100807	4681	tags=33%, list=19%, signal=27%	83716/5156/10253/1544/4311/10365/7472/9719/3290/5604/10427/23414/2294/3280/6441/9509/28512/1116/2737/7043/60485/659/2247/4846/3845/6943/7048/3596/64399/2034/2736/7068/3488/2627/10252/10728/10413/26154/3675/3694/998/7124/84525/57333/93649/1281/3976/7482/83931/147372/57493/54206/6909/79977
BP	GO:0031638	zymogen activation	60	0.482086	2.10386	1.79605e-05	0.000160782	0.000101054	5544	tags=45%, list=22%, signal=35%	715/3428/7057/7123/5054/51279/922/83874/64065/3083/2158/27141/2160/444/841/354/5641/26999/5327/1361/3250/3240/8772/115209/2243/350/2244
BP	GO:0019229	regulation of vasoconstriction	60	0.481973	2.10336	1.81809e-05	0.000162569	0.000102177	5544	tags=48%, list=22%, signal=38%	5743/133/1621/6916/1906/27345/148/659/340481/147/6915/151/5023/185/10800/2149/1889/9732/59272/952/150/3741/857/342527/4313/6869/2243/387/2244
BP	GO:0032963	collagen metabolic process	81	0.42417	1.95309	1.85741e-05	0.000165896	0.000104268	5371	tags=41%, list=21%, signal=32%	3569/4239/3091/1471/2022/9697/11117/4316/1520/114757/9509/8510/7043/4327/9902/2149/7431/54361/4317/1508/1513/4326/57333/409/1289/4314/4313/54206/4319/79148/2191/5653/5159
BP	GO:0051604	protein maturation	266	0.293124	1.63388	1.87882e-05	0.000167617	0.00010535	3532	tags=26%, list=14%, signal=23%	715/5552/837/2619/3428/7057/4311/7123/5054/8530/5621/2395/119587/831/51279/7850/922/1520/824/10549/120892/2934/10418/9509/834/2737/590/11093/23621/839/2152/85409/83874/64065/3083/5567/2158/81689/27141/60496/649/2160/9528/444/2028/841/10077/354/2653/5289/5641/5663/79659/1889/60559/9512/6196/1203/59272/8532/25825/199713/9973/7092/6653/83752/26999/5327/10159/1361
BP	GO:0006911	phagocytosis, engulfment	51	0.512768	2.14872	1.95089e-05	0.000173849	0.000109267	4631	tags=45%, list=18%, signal=37%	7057/3543/11314/8685/5336/718/2934/5880/9938/11031/4481/391/64581/199/2213/286046/998/3689/3684/6845/3071/2209/1182
BP	GO:0051047	positive regulation of secretion	284	0.292649	1.63425	1.96286e-05	0.000174716	0.000109812	5392	tags=32%, list=21%, signal=25%	114897/6387/3091/6279/3553/6386/654/7099/51762/8600/3717/65018/3134/1906/1910/143425/8529/23086/27063/2268/7043/4824/640/10972/358/3596/9367/7097/1080/5724/51124/6622/9525/8723/3565/6558/3783/25924/945/6850/5020/8564/8754/10802/116/18/201294/7376/3689/27230/5868/9474/3684/1361/9501/11132/5873/952/8911/9607/5532/6845/27183/3479/2771/1813/3458/22925/9854/4881/23607/7424/43/3822/2668/8111/6869/242/7…
BP	GO:0000018	regulation of DNA recombination	93	-0.465192	-1.97435	2.027e-05	0.000180221	0.000113272	5427	tags=44%, list=22%, signal=35%	7158/4292/3838/151987/56154/196528/8607/5932/2187/86/3586/7037/64110/6944/2521/11105/51750/4437/7292/23126/56893/4436/1111/142/63979/29072/6830/10111/10635/55929/8914/54799/57634/2956/10902/10721/9400/8295/641/22976/9984
BP	GO:0048762	mesenchymal cell differentiation	220	0.309893	1.67355	2.0364e-05	0.000180852	0.000113668	3685	tags=26%, list=15%, signal=23%	3037/3569/10253/3091/3553/55273/2022/10439/7472/3084/6386/57142/3357/6422/202151/1906/1910/653/3280/9464/90102/596/2296/4092/7043/2042/8320/6943/30812/7048/23493/25937/8828/54361/64218/7049/26508/147906/80709/202018/10252/2625/6615/2487/54910/998/64839/57556/223117/3082/6275/58495/10507/2316/23187/10370/5728/6772
BP	GO:0003206	cardiac chamber morphogenesis	119	0.379975	1.88242	2.04079e-05	0.000181036	0.000113784	4720	tags=37%, list=19%, signal=30%	9510/4061/3091/7010/2022/7472/3084/4889/2274/4091/55742/653/23414/2294/3280/9464/2296/4092/60485/659/9353/4846/7048/23493/8828/7049/2627/26508/8321/2625/4634/58495/7135/10370/90/7139/10512/5318/4624/2931/57493/6909/79977/6899
BP	GO:0045061	thymic T cell selection	22	0.676341	2.32233	2.0486e-05	0.000181524	0.00011409	3417	tags=64%, list=14%, signal=55%	1236/915/5788/1794/2737/972/917/916/84433/7535/2625/940/9474/3707
BP	GO:0003158	endothelium development	113	0.379935	1.87366	2.08379e-05	0.000184433	0.000115919	2525	tags=26%, list=10%, signal=23%	388/3397/25932/7852/3553/55273/5144/3084/654/2658/91663/4615/84913/7132/1910/26051/5138/30061/659/340481/11167/23493/2947/2701/5175/10855/7075/3383/94
BP	GO:0000245	spliceosomal complex assembly	36	-0.605309	-2.13131	2.12745e-05	0.000188085	0.000118214	8018	tags=72%, list=32%, signal=49%	10181/24148/6632/91746/10291/57461/23064/10907/58155/51631/6633/79833/22827/27339/1653/4686/6631/6732/51340/8175/6635/10946/26576/6637/10713/9416
BP	GO:0006284	base-excision repair	41	-0.561524	-2.02987	2.14535e-05	0.000189454	0.000119075	4846	tags=56%, list=19%, signal=45%	55170/5111/7486/11284/55247/27301/27343/8930/4595/7515/5426/328/1763/23583/7374/3978/2237/5424/10075/10721/6996/3980/10038
BP	GO:0043304	regulation of mast cell degranulation	31	0.603402	2.27853	2.21091e-05	0.000195023	0.000122575	2910	tags=48%, list=12%, signal=43%	11314/3162/2294/4067/2268/5880/640/3596/8723/3565/8832/6850/3965/3598/201294
BP	GO:0046328	regulation of JNK cascade	130	0.374076	1.88181	2.21823e-05	0.000195449	0.000122842	3323	tags=33%, list=13%, signal=29%	6363/26191/6366/7164/9611/3553/9770/85458/6386/653361/4616/7099/4615/939/8600/1540/1236/6422/65018/10125/80824/59341/5048/5609/2950/7098/29969/6504/7189/56940/2047/51339/51562/4317/2213/4055/10114/5187/998/2185/9618/140885/7124
CC	GO:0034358	plasma lipoprotein particle	34	0.580974	2.23447	2.2352e-05	0.000196502	0.000123505	5773	tags=50%, list=23%, signal=39%	3949/319/1191/3931/6288/5360/4481/6291/1071/4018/3250/346/3990/7436/6289/350/335
CC	GO:1990777	lipoprotein particle	34	0.580974	2.23447	2.2352e-05	0.000196502	0.000123505	5773	tags=50%, list=23%, signal=39%	3949/319/1191/3931/6288/5360/4481/6291/1071/4018/3250/346/3990/7436/6289/350/335
BP	GO:0001562	response to protozoan	25	0.642001	2.30693	2.24498e-05	0.00019714	0.000123906	5064	tags=72%, list=20%, signal=58%	4615/3662/10538/602/64581/79679/163351/115361/1667/10077/3593/3394/116071/6556/4818/388646/3566/5196
BP	GO:0048247	lymphocyte chemotaxis	57	0.490192	2.11535	2.27467e-05	0.000199524	0.000125404	5612	tags=51%, list=22%, signal=40%	6347/6363/6366/9023/6352/6368/388372/6288/5294/414062/729230/1667/6558/6349/6359/6369/2185/2621/6348/5293/6362/11240/6367/6361/6360/3627/6373/102/6355
BP	GO:0042326	negative regulation of phosphorylation	319	0.278666	1.57381	2.29918e-05	0.000201448	0.000126613	5186	tags=33%, list=21%, signal=27%	9021/3725/203228/26191/64092/10253/11213/9611/22933/3553/2022/4908/5144/9770/80149/4616/91663/11314/5621/143941/245928/54386/4091/6422/11117/5787/79705/120892/1848/55022/5788/83891/57732/4067/5997/80824/54900/4092/2950/2646/9353/6774/8651/90007/6609/56940/25937/5783/6622/9467/113791/10252/5343/9104/1027/5925/26524/5080/5663/10114/3486/6546/2203/6456/801/10935/7128/6653/54922/3082/140885/11006/105…
BP	GO:0014066	regulation of phosphatidylinositol 3-kinase signaling	98	0.409569	1.96372	2.32755e-05	0.000203706	0.000128032	4142	tags=37%, list=16%, signal=31%	5156/1634/56034/7010/3059/653361/6352/3717/26051/6403/118788/10125/2268/2247/4824/847/10870/5649/2149/80310/5783/113791/4920/2322/5343/940/49860/4915/3082/7124/10507/5728/284/3480/3479/5008
BP	GO:0051298	centrosome duplication	60	-0.51792	-2.03437	2.37684e-05	0.000207787	0.000130598	2123	tags=38%, list=8%, signal=35%	80254/163786/116840/25914/22995/4591/284403/55226/55835/55722/55755/10733/6491/7840/672/9793/55125/10403/7517/10432/29901/7514/899
BP	GO:0032733	positive regulation of interleukin-10 production	38	0.567302	2.24734	2.39168e-05	0.000208852	0.000131267	3841	tags=53%, list=15%, signal=45%	3569/353514/7099/3662/5336/602/6774/3596/7097/64581/3565/959/3593/9308/6850/3965/51561/940/3082/64127
BP	GO:0045824	negative regulation of innate immune response	66	0.460492	2.03218	2.40356e-05	0.000209656	0.000131772	5384	tags=45%, list=21%, signal=36%	1398/2/11213/710/3428/3133/5272/4938/11326/3134/3106/10225/3821/3824/9111/84868/1378/3965/3805/7376/7128/387837/409/100507436/1813/6737/79132/634/3105/253943
BP	GO:2000379	positive regulation of reactive oxygen species metabolic process	63	0.471441	2.06002	2.43959e-05	0.000212562	0.000133598	5116	tags=54%, list=20%, signal=43%	2358/4780/7057/80149/7099/5336/706/1545/55022/2950/7305/7048/64581/185/6622/4317/6648/84329/6850/59272/3689/2185/3684/5873/2773/2771/6647/11035/2309/1182/10333/51181/1535/1647
BP	GO:0033077	T cell differentiation in thymus	75	0.450888	2.04426	2.54357e-05	0.000220884	0.000138829	3417	tags=39%, list=14%, signal=34%	567/3575/3553/678/6194/1236/10125/677/915/5788/1960/1794/596/2737/64919/972/9935/2736/917/916/54361/84433/8325/7535/1021/2625/940/9474/3707
BP	GO:0097191	extrinsic apoptotic signaling pathway	208	0.315275	1.69278	2.5385e-05	0.000220884	0.000138829	4736	tags=34%, list=19%, signal=28%	4170/8406/7057/3553/1621/5054/51330/467/7133/81537/939/1540/3717/6422/3162/7132/7078/653/7001/5788/355/4118/596/8742/9531/2950/7098/8915/4846/8717/8738/2872/5970/3958/3565/2139/50486/841/51202/3383/10413/4055/5366/11337/1654/6688/162989/7128/389400/3082/7124/2729/9821/8797/8692/5728/3574/90/3479/2537/4803/3458/857/8772/55179/6591/8837/2931/2309/147138/2668
BP	GO:0016032	viral process	374	0.266404	1.52903	2.54181e-05	0.000220884	0.000138829	3534	tags=26%, list=14%, signal=22%	7538/6347/3725/1604/4061/1969/975/9023/3665/5359/942/10346/3428/64135/3949/1949/7852/558/4939/80149/1436/6352/4938/2040/2959/8519/8547/51510/4774/51574/2934/339390/6041/920/596/2219/4684/1452/2530/10332/4599/10663/29969/6504/8661/6520/91543/6609/6404/79720/972/185/325/9525/51773/1105/6614/4153/8665/8666/85363/1508/92421/25834/6554/3383/2060/3695/1378/3965/60559/5091/2672/89870/7405/684/59272/1654…
BP	GO:0014812	muscle cell migration	76	0.43126	1.96973	2.54749e-05	0.00022098	0.000138889	3459	tags=34%, list=14%, signal=30%	1398/3037/4780/9510/10672/4609/5054/7099/301/6352/55742/1545/596/9353/5031/199/80310/3488/51177/3486/9732/65009/6282/6653/5327/10092
BP	GO:0080164	regulation of nitric oxide metabolic process	54	0.501282	2.13201	2.56533e-05	0.000222281	0.000139707	4861	tags=48%, list=19%, signal=39%	9314/5743/10365/3553/80149/7099/3717/706/1906/1191/5311/5740/64581/199/4317/9104/6648/961/2185/140885/7124/64902/3458/857/148022/10333
BP	GO:0007099	centriole replication	31	-0.620476	-2.08081	2.57928e-05	0.000223243	0.000140312	3653	tags=52%, list=15%, signal=44%	80254/163786/116840/25914/22995/4591/284403/55835/55722/55755/10733/6491/7840/672/55125/10432
BP	GO:0002717	positive regulation of natural killer cell mediated immunity	29	0.596583	2.1923	2.65373e-05	0.000229434	0.000144202	5046	tags=59%, list=20%, signal=47%	10666/3133/3134/10125/114836/4068/11126/3824/3823/3902/3593/3805/59067/56253/8302/3822/117157
BP	GO:0045598	regulation of fat cell differentiation	119	0.377049	1.86792	2.71654e-05	0.000234605	0.000147452	3776	tags=29%, list=15%, signal=25%	7538/284207/5743/3569/3398/22933/11007/122953/678/80149/2308/240/5292/6422/677/23414/83643/3280/59341/60485/6783/25937/1389/6648/10413/2625/1240/3400/6095/2487/51320/7124/27120/3638/28951
BP	GO:0001933	negative regulation of protein phosphorylation	288	0.289436	1.61556	2.79781e-05	0.000241357	0.000151697	5186	tags=34%, list=21%, signal=27%	9021/3725/203228/26191/64092/10253/11213/22933/3553/2022/4908/5144/9770/80149/4616/91663/11314/5621/143941/245928/54386/4091/6422/11117/5787/79705/120892/1848/55022/5788/83891/57732/4067/5997/80824/54900/4092/2950/9353/8651/6609/56940/25937/5783/6622/9467/10252/9104/1027/5925/26524/5080/5663/10114/3486/6546/6456/801/7128/6653/54922/3082/140885/11006/10507/152559/8692/5728/409/28951/56937/93649/28…
BP	GO:0090218	positive regulation of lipid kinase activity	34	0.578012	2.22308	2.80832e-05	0.00024186	0.000152012	3009	tags=41%, list=12%, signal=36%	2358/6363/5156/6366/975/64805/7010/1236/4067/2268/2247/2322/998/2185
MF	GO:0004518	nuclease activity	153	-0.39443	-1.78827	2.80981e-05	0.00024186	0.000152012	5898	tags=40%, list=23%, signal=31%	55124/11277/129563/81875/7486/10248/5810/5395/80198/11284/7247/10940/340554/5932/10799/27301/23019/122665/79605/167227/131870/5889/1653/8930/9924/9937/85495/7515/51692/4848/146956/54840/5426/81887/4830/55728/246243/27044/328/10535/1773/1763/79897/9156/5883/80746/23404/1775/10111/90806/64421/57472/9797/51367/2237/5424/7517/57109/115752/80153/23357
BP	GO:0032956	regulation of actin cytoskeleton organization	303	0.281569	1.58367	3.01345e-05	0.000259104	0.000162851	4497	tags=29%, list=18%, signal=24%	1398/390/203228/5734/388/5156/3397/6366/6387/7010/8826/9535/22998/4908/85458/1902/3059/1436/91663/5999/11170/1236/6422/4070/1906/2934/7111/90102/5880/7043/22899/2042/9353/2314/148170/27236/7454/10435/5066/23647/391/23406/23191/8477/11034/11151/54361/9639/2059/9873/5341/51225/27/961/10602/119/29109/5216/6369/3055/684/10174/6548/10095/998/11346/2044/2185/5756/123016/26999/2316/10092/9948/54961/397/…
CC	GO:0071007	U2-type catalytic step 2 spliceosome	28	-0.638322	-2.11018	3.06484e-05	0.000262658	0.000165084	3741	tags=61%, list=15%, signal=52%	8896/6633/27339/6629/23524/6627/6628/6634/6636/51340/6635/51645/9716/55696/6637/9343/1659
BP	GO:0032418	lysosome localization	71	0.447453	2.01656	3.0625e-05	0.000262658	0.000165084	5294	tags=44%, list=21%, signal=35%	695/5730/11314/3162/10125/2294/4067/2268/5880/5294/640/3596/8723/3565/8773/8832/6850/3965/3598/201294/81565/6284/5293/6845/79803/5729/55207/7462/3566/282991/54849
BP	GO:1990849	vacuolar localization	71	0.447453	2.01656	3.0625e-05	0.000262658	0.000165084	5294	tags=44%, list=21%, signal=35%	695/5730/11314/3162/10125/2294/4067/2268/5880/5294/640/3596/8723/3565/8773/8832/6850/3965/3598/201294/81565/6284/5293/6845/79803/5729/55207/7462/3566/282991/54849
BP	GO:0010273	detoxification of copper ion	13	0.77177	2.20512	3.10443e-05	0.000265469	0.000166851	1793	tags=62%, list=7%, signal=57%	4499/4502/4493/4494/4501/4489/4495/4496
BP	GO:1990169	stress response to copper ion	13	0.77177	2.20512	3.10443e-05	0.000265469	0.000166851	1793	tags=62%, list=7%, signal=57%	4499/4502/4493/4494/4501/4489/4495/4496
BP	GO:0043405	regulation of MAP kinase activity	172	0.339381	1.7711	3.119e-05	0.000266424	0.000167452	3534	tags=28%, list=14%, signal=24%	6363/26191/7164/10253/11213/7057/56034/3553/4908/7099/11314/8600/6283/245928/3357/6422/1906/10125/120892/7039/5788/4067/5997/80824/54900/5609/2950/2247/5294/23328/6609/7189/23533/80310/4920/2322/10252/8325/5663/6850/10114/8754/11235/2185/6653/7124/152559/8692
BP	GO:0010039	response to iron ion	29	0.59299	2.1791	3.15735e-05	0.000269407	0.000169326	3410	tags=52%, list=14%, signal=45%	3091/567/654/2395/79901/3162/595/57817/596/30061/6622/210/1543/18/9474
BP	GO:0006298	mismatch repair	27	-0.644333	-2.11896	3.19526e-05	0.000272345	0.000171173	5908	tags=63%, list=23%, signal=48%	5111/11277/4292/5395/25/27030/4595/10714/4437/4436/10535/29072/9156/83933/3978/2956/6996
BP	GO:0045429	positive regulation of nitric oxide biosynthetic process	37	0.558049	2.18773	3.20485e-05	0.000272865	0.0001715	5673	tags=57%, list=23%, signal=44%	9314/5743/10365/3553/7099/3717/1906/1191/5311/64581/199/4317/6648/2185/7124/64902/3458/148022/10333/3043/445
BP	GO:0032703	negative regulation of interleukin-2 production	24	0.652178	2.29599	3.21091e-05	0.000273084	0.000171638	4413	tags=62%, list=18%, signal=52%	7538/5621/11326/2633/5788/6441/7805/3902/84868/1378/2625/7128/11006/64127/9455
CC	GO:0012507	ER to Golgi transport vesicle membrane	58	0.479877	2.08752	3.2838e-05	0.00027898	0.000175343	3156	tags=41%, list=13%, signal=36%	567/3133/10427/3134/3106/9871/3125/7039/3998/3117/10972/8615/972/3113/10490/3107/3119/3115/3122/3136/56681/3126/10802/2890
BP	GO:0031214	biomineral tissue development	152	0.343815	1.77442	3.34152e-05	0.000283577	0.000178232	4723	tags=32%, list=19%, signal=26%	5743/5552/3091/1893/7071/7123/654/92/51119/1230/240/2268/7043/659/4256/4846/249/23493/9451/1080/54361/29887/166929/57419/4920/752014/22904/6546/5741/3694/2185/2621/338773/5764/6348/4958/154/55589/9562/90/3479/8074/6786/7475/2824/6093/4146/6899/2697
BP	GO:0008360	regulation of cell shape	131	0.362525	1.82785	3.37764e-05	0.000286332	0.000179964	3820	tags=30%, list=15%, signal=25%	1398/6347/390/388/10672/2534/1902/55843/1436/23136/301/55742/4651/2268/7940/5880/54873/148170/57194/10435/391/23191/89846/11151/64218/2059/51177/10602/6369/3055/3689/2185/56990/10428/6348/10507/56882/9948/114793
BP	GO:0043161	proteasome-mediated ubiquitin-dependent protein catabolic process	357	-0.322057	-1.60808	3.40206e-05	0.00028809	0.000181069	6013	tags=36%, list=24%, signal=27%	51377/5702/57761/122809/10273/6815/8312/64795/51667/10206/1453/4287/126433/25852/92305/57414/26235/9575/115290/130617/23510/7874/79699/1017/118424/6469/23532/122416/6468/25831/253980/1161/9097/90637/64682/8473/117584/55743/6599/83737/2932/8450/1454/821/5714/93611/8945/378884/26133/11124/84961/55741/5710/51434/10869/23291/3326/54442/5707/5708/149603/1642/7184/11146/54476/26263/6449/3309/8453/9112/…
BP	GO:0002827	positive regulation of T-helper 1 type immune response	18	0.70355	2.23682	3.42027e-05	0.000289007	0.000181645	2773	tags=50%, list=11%, signal=45%	3553/8809/3594/3554/6504/729230/3593/6556/51561
BP	GO:0002604	regulation of dendritic cell antigen processing and presentation	11	0.817167	2.2247	3.41745e-05	0.000289007	0.000181645	3841	tags=91%, list=15%, signal=77%	6363/6366/7057/10875/1236/972/2213/6556/968/64127
BP	GO:0098534	centriole assembly	34	-0.603316	-2.07584	3.48318e-05	0.000294006	0.000184787	3653	tags=50%, list=15%, signal=43%	80254/163786/124093/116840/25914/22995/4591/284403/55835/55722/55755/10733/6491/7840/672/55125/10432
BP	GO:0031529	ruffle organization	46	0.517488	2.14017	3.53832e-05	0.000298338	0.00018751	3031	tags=41%, list=12%, signal=36%	6366/64805/1436/1236/4070/26751/23647/391/23191/199/29887/2059/5341/3383/51225/54869/83478/5216/81565
BP	GO:0009266	response to temperature stimulus	162	0.336121	1.7348	3.54451e-05	0.000298539	0.000187636	4993	tags=35%, list=20%, signal=28%	2353/284207/5743/6387/7057/133/11080/51316/7852/79054/2308/4804/3357/3162/56925/4067/59341/3337/9531/3490/5609/4846/2047/9451/644168/929/3281/1153/841/6648/3316/376497/170506/6548/37/796/286133/49860/1006/6769/472/2729/1361/154/409/10294/3306/3479/100507436/6647/55466/23411/5313/34/6869/3627/153
BP	GO:1904996	positive regulation of leukocyte adhesion to vascular endothelial cell	21	0.678771	2.28605	3.6508e-05	0.000307162	0.000193056	3323	tags=67%, list=13%, signal=58%	3569/10164/240/6401/3676/6403/2113/7189/729230/5970/5724/2529/3689/7124
BP	GO:0045622	regulation of T-helper cell differentiation	37	0.555357	2.17717	3.72891e-05	0.000313396	0.000196974	3041	tags=46%, list=12%, signal=40%	6363/942/80149/10892/114548/301/3662/3594/4092/64332/3565/3122/3593/149041/51561/84807/3142
BP	GO:0030889	negative regulation of B cell proliferation	17	0.72044	2.22334	3.73845e-05	0.000313862	0.000197267	3506	tags=76%, list=14%, signal=66%	695/11314/4067/3635/23495/7305/640/2213/4332/149041/1493/27242/472
BP	GO:0006364	rRNA processing	167	-0.380812	-1.75188	3.74318e-05	0.000313922	0.000197305	4780	tags=38%, list=19%, signal=31%	79050/11103/2091/23481/11224/10521/55636/27043/11137/90121/10799/10438/6201/317781/84128/6227/6155/55164/9277/9775/25926/25983/131870/117246/10199/285855/1736/10885/79954/23560/79039/64963/5591/55661/29777/51547/54555/9136/23195/153443/5303/54663/81887/51154/10360/10607/55226/55813/23076/23404/4931/113000/79707/65083/54606/79922/27079/51367/5036/3692/6839/57647/55695/57109
BP	GO:0006937	regulation of muscle contraction	149	0.35039	1.80401	3.77415e-05	0.000316181	0.000198725	4671	tags=35%, list=19%, signal=29%	5743/5142/5144/80149/3164/1906/287/4608/148/5997/59341/30845/1193/4092/340481/147/5294/6915/9446/3778/60675/151/5023/2149/5724/7140/5020/9732/6546/59272/18/6548/796/4634/2258/801/255743/154/7135/10398/93649/7139/150/4660/9312/5318/6647/857/10142/10021/775/51086
BP	GO:1902969	mitotic DNA replication	12	-0.787194	-2.07921	3.80549e-05	0.000318466	0.00020016	1929	tags=58%, list=8%, signal=54%	64785/4175/4173/4172/3978/4171/5422
BP	GO:0071639	positive regulation of monocyte chemotactic protein-1 production	13	0.767345	2.19248	3.81505e-05	0.000318925	0.000200449	3841	tags=69%, list=15%, signal=59%	3553/4938/59341/255231/64581/8832/6850/3965/64127
BP	GO:0006936	muscle contraction	317	0.282229	1.5977	3.85199e-05	0.00032167	0.000202175	4736	tags=29%, list=19%, signal=24%	5743/5142/2775/7852/5144/80149/3164/3357/3781/1906/1910/287/2934/4608/7111/9172/148/6324/5997/59341/30845/1193/4092/340481/147/3764/5294/6915/9446/3753/3778/5910/6442/60675/151/5023/55959/2149/5724/1410/3281/8082/444/5606/80852/126306/7140/4638/5020/9732/6444/26287/6546/59272/18/6548/796/4634/2258/801/255743/9499/800/6769/7124/2316/154/7135/4606/10398/952/5286/93649/7139/150/3741/4660/9312/5318/1…
MF	GO:0070330	aromatase activity	24	0.648881	2.28438	3.87216e-05	0.000322677	0.000202808	5285	tags=62%, list=21%, signal=49%	1544/1571/1576/1545/8529/1562/1559/1549/1543/1580/1558/1551/64816/1577/1579
BP	GO:0014002	astrocyte development	40	0.53558	2.14538	3.87229e-05	0.000322677	0.000202808	4687	tags=55%, list=19%, signal=45%	2358/3569/728/3949/10319/6279/3553/7099/3459/6280/3845/10100/712/7431/4920/1021/5663/7124/351/3458/2670/3913
CC	GO:0000428	DNA-directed RNA polymerase complex	83	-0.458181	-1.9135	3.88996e-05	0.000323805	0.000203516	5343	tags=42%, list=21%, signal=33%	51728/11036/84172/10621/10629/6877/2957/5558/5441/2960/138474/51616/79871/5435/6908/8464/5557/5433/5439/23168/6884/55703/5437/6872/11128/4172/2071/2968/123169/6874/171568/5422/23649/9400/8295
BP	GO:0065004	protein-DNA complex assembly	109	-0.420325	-1.82448	3.93661e-05	0.000327225	0.000205666	5373	tags=44%, list=21%, signal=35%	1616/64061/5893/64754/55832/10629/3148/51053/50809/6046/6877/26054/401541/83743/6597/138474/54108/54107/257218/55814/5889/6908/9733/2491/4676/11339/11144/23234/23126/6884/1058/6872/55290/2972/3070/6598/8208/4678/1062/81620/64105/1063/4171/9735/6874/55723/55355/7343
BP	GO:0110148	biomineralization	153	0.343448	1.78074	3.94358e-05	0.000327225	0.000205666	4723	tags=32%, list=19%, signal=26%	5743/5552/3091/1893/7071/7123/654/92/51119/1230/240/2268/7043/659/4256/4846/249/23493/9451/1080/54361/29887/166929/57419/4920/752014/22904/6546/5741/3694/2185/2621/338773/5764/6348/4958/154/55589/9562/90/3479/8074/6786/7475/2824/6093/4146/6899/2697
BP	GO:0060284	regulation of cell development	450	0.254555	1.48918	3.93949e-05	0.000327225	0.000205666	4549	tags=26%, list=18%, signal=22%	1398/3037/1959/3572/3397/3569/6387/4609/3398/22933/3091/567/3949/4311/1949/7852/3553/85458/7472/7133/91663/57142/5604/8600/4070/5583/7132/706/1910/2633/120892/3280/7052/4067/596/2737/4092/5048/659/5530/340481/4739/9353/708/7305/30812/23191/7097/64581/23493/140578/5649/57165/5176/64218/9253/26508/4131/9706/3987/8867/7520/10413/5080/5663/23529/3611/646/9355/3400/170506/1002/2487/54910/201294/1600/9…
BP	GO:0000727	double-strand break repair via break-induced replication	10	-0.82348	-2.05296	3.97628e-05	0.00032959	0.000207152	2946	tags=100%, list=12%, signal=88%	51659/84296/8317/4175/4173/4176/4172/4174/4171
BP	GO:0007202	activation of phospholipase C activity	27	0.619645	2.24235	4.01002e-05	0.000332034	0.000208689	3201	tags=52%, list=13%, signal=45%	942/728/64805/3702/1902/6401/3357/148/5031/11331/7294/2769/5741/5330
BP	GO:0007229	integrin-mediated signaling pathway	98	0.402143	1.92811	4.02063e-05	0.000332562	0.00020902	3945	tags=37%, list=16%, signal=31%	9510/3676/3680/2268/967/11093/2530/4739/7294/2013/10077/959/84106/9358/5341/3987/3695/1307/961/6850/3055/3611/8754/7076/3675/3681/3694/998/3689/2185/5764/2316/3684/83605/1281/83706
BP	GO:0002399	MHC class II protein complex assembly	16	0.727675	2.22038	4.07193e-05	0.000336095	0.000211241	4257	tags=69%, list=17%, signal=57%	567/3125/3117/3113/3119/3115/3122/3111/3126/3109/3112
BP	GO:0002503	peptide antigen assembly with MHC class II protein complex	16	0.727675	2.22038	4.07193e-05	0.000336095	0.000211241	4257	tags=69%, list=17%, signal=57%	567/3125/3117/3113/3119/3115/3122/3111/3126/3109/3112
CC	GO:0005685	U1 snRNP	16	-0.735452	-2.12174	4.11868e-05	0.000339239	0.000213217	3636	tags=69%, list=14%, signal=59%	51631/6633/6629/6631/6628/6634/6636/25766/6635/6637/6626
BP	GO:0060485	mesenchyme development	270	0.291268	1.62237	4.11499e-05	0.000339239	0.000213217	3685	tags=26%, list=15%, signal=22%	3037/3569/10253/4609/3091/3553/55273/2022/10439/7472/3084/6386/57142/10409/3357/6422/202151/1906/1910/677/653/23414/2294/3280/9464/90102/596/2296/5311/4092/7043/659/2042/8320/4846/6943/30812/7048/7490/23493/25937/8828/54361/64218/7049/26508/147906/80709/202018/10252/10413/2625/94/7258/6615/2487/54910/998/64839/57556/223117/3082/6275/58495/10507/2316/23187/10370/5728/6772
BP	GO:0045930	negative regulation of mitotic cell cycle	183	-0.377917	-1.75142	4.15262e-05	0.000341675	0.000214748	2954	tags=29%, list=12%, signal=26%	55055/652/55159/9344/11200/5591/1112/60561/9656/146956/51720/27085/51343/5933/2177/4436/51514/1111/5514/11130/65123/5883/54962/9319/7756/835/56658/55755/4085/672/699/90806/26271/4193/9368/7272/80279/891/144455/990/81620/1063/9212/10403/9735/57551/7517/29980/84936/51512/2146/84861/641
BP	GO:0046685	response to arsenic-containing substance	31	0.590068	2.22818	4.21578e-05	0.000346499	0.00021778	3512	tags=52%, list=14%, signal=44%	4982/4609/80149/54407/467/3162/1545/79752/9446/2872/5176/210/1543/1654/170506/2729
BP	GO:0033006	regulation of mast cell activation involved in immune response	33	0.57847	2.20348	4.22009e-05	0.000346499	0.00021778	2910	tags=45%, list=12%, signal=40%	11314/3162/2294/4067/2268/5880/640/3596/8723/3565/8832/6850/3965/3598/201294
BP	GO:0003015	heart process	233	0.305778	1.671	4.25186e-05	0.000348742	0.000219189	4723	tags=32%, list=19%, signal=26%	5142/133/2534/7852/5144/80149/79717/5999/3717/3781/10060/1906/1910/10268/287/2934/1839/2643/148/6324/5997/30845/1193/4092/147/4846/3764/5294/9446/3753/2034/140/23493/25937/489/7068/2627/5606/10413/5020/6505/6196/6444/6546/59272/6548/998/796/4634/2258/801/125111/7124/9474/2316/1573/84525/7135/7139/3741/2771/5318/1813/6647/857/10142/2740/4624/10021/2931/781/6909/775/51086/2697
BP	GO:0042730	fibrinolysis	23	0.655675	2.28785	4.27476e-05	0.000350253	0.000220139	6235	tags=74%, list=25%, signal=56%	7056/710/7057/5054/2160/5055/5627/5327/1361/2811/3848/2191/2243/350/2244/5340/3818
BP	GO:0006720	isoprenoid metabolic process	110	0.382539	1.8715	4.40154e-05	0.000360264	0.000226432	5591	tags=45%, list=22%, signal=35%	1544/1571/54658/220/1576/1545/125/1592/128/126/54884/127/5959/64577/1562/1559/54577/130/6715/9227/5947/124/8228/1543/54905/1558/5949/10170/1551/224/8608/54659/57104/54600/1565/79644/57665/27235/51635/55825/1577/29785/145226/151056/57107/5264/5950/4035/317749
MF	GO:0016796	exonuclease activity, active with either ribo- or deoxyribonucleic acids and producing 5'-phosphomonoesters	49	-0.526426	-1.99017	4.4596e-05	0.000364635	0.000229179	5766	tags=49%, list=23%, signal=38%	11277/129563/81875/5810/27301/23019/167227/9924/9937/51692/4848/54840/5426/328/9156/5883/23404/90806/64421/57472/2237/5424/115752/23357
BP	GO:1904407	positive regulation of nitric oxide metabolic process	38	0.55416	2.19527	4.48383e-05	0.000365925	0.000229989	5855	tags=58%, list=23%, signal=44%	9314/5743/10365/3553/7099/3717/1906/1191/5311/64581/199/4317/6648/2185/7124/64902/3458/148022/10333/3043/445/4852
BP	GO:1902893	regulation of miRNA transcription	57	0.479574	2.06953	4.48472e-05	0.000365925	0.000229989	3338	tags=39%, list=13%, signal=34%	9314/2353/1958/3725/4609/3091/4804/4091/84913/2113/5460/2247/6774/7490/5970/8061/2627/2625/7376/6688/7124/11006
BP	GO:0006400	tRNA modification	65	-0.488977	-1.96373	4.52181e-05	0.000368568	0.00023165	6305	tags=48%, list=25%, signal=36%	26610/63899/57570/63892/54802/56931/55140/11062/80745/9836/55621/144233/55798/54901/126789/285605/27304/51654/55226/54522/54517/64118/127253/10785/84267/80324/11180/6894/55687/84705/81605
CC	GO:0055029	nuclear DNA-directed RNA polymerase complex	82	-0.464514	-1.93842	4.56483e-05	0.000371687	0.000233611	5343	tags=43%, list=21%, signal=34%	51728/11036/84172/10621/10629/6877/2957/5558/5441/2960/138474/51616/79871/5435/6908/8464/5557/5433/5439/23168/6884/55703/5437/6872/11128/4172/2071/2968/123169/6874/171568/5422/23649/9400/8295
BP	GO:0042573	retinoic acid metabolic process	34	0.570048	2.19245	4.64607e-05	0.000377909	0.000237521	3698	tags=56%, list=15%, signal=48%	54658/220/1576/125/1592/126/64577/1562/54577/130/5947/124/1543/54905/1558/10170/1551/54659/54600
BP	GO:0050820	positive regulation of coagulation	21	0.668428	2.25122	4.69769e-05	0.000381712	0.000239911	2463	tags=48%, list=10%, signal=43%	4780/7056/7057/5054/7001/2152/6915/2149/10855/5663
BP	GO:0002357	defense response to tumor cell	10	0.817291	2.15053	4.74866e-05	0.000385453	0.000242263	3034	tags=70%, list=12%, signal=62%	9314/27303/7001/5551/7805/51225/6688
BP	GO:0008228	opsonization	16	0.723754	2.20842	4.80559e-05	0.000389288	0.000244674	4140	tags=69%, list=16%, signal=57%	2220/5322/78989/10584/8547/2219/722/4153/725/721/3929
CC	GO:0101003	ficolin-1-rich granule membrane	56	0.472986	2.02803	4.80584e-05	0.000389288	0.000244674	4219	tags=38%, list=17%, signal=31%	2357/2358/6515/1604/11314/5547/10288/374403/5799/3920/2207/3958/965/1378/6556/3689/140885/8987/10159/3071/1828
BP	GO:0070741	response to interleukin-6	36	0.564485	2.19104	4.82091e-05	0.000390106	0.000245187	3345	tags=53%, list=13%, signal=46%	3572/3569/3716/3717/55022/57817/1116/6774/5740/6404/5970/820/10413/114900/22904/2672/6688/4790/5105
BP	GO:0046427	positive regulation of receptor signaling pathway via JAK-STAT	42	0.512865	2.08263	4.83191e-05	0.000390592	0.000245493	3323	tags=43%, list=13%, signal=37%	132299/3569/3575/11314/3587/6352/3717/1545/3280/8651/3588/2149/3565/3593/51561/51379/2185/7124
BP	GO:0042092	type 2 immune response	35	0.5642	2.17693	4.87003e-05	0.000392917	0.000246954	3860	tags=49%, list=15%, signal=41%	975/3569/942/1893/114548/301/10538/602/91543/972/729230/3565/2625/3142/255877/64127/3456
CC	GO:0010008	endosome membrane	456	0.251721	1.4745	4.87071e-05	0.000392917	0.000246954	4355	tags=27%, list=17%, signal=23%	388/3665/118429/9741/55858/567/3949/912/3133/9482/8417/7099/4615/51762/11342/79689/301/55340/55293/285195/3134/51510/3106/3125/83891/57732/30845/10254/84174/967/3920/83547/23621/7323/55041/84168/7098/3117/23643/7314/5872/11031/51311/255231/7189/79720/2047/3113/1080/9375/10490/9135/4689/55240/29887/9525/8723/929/2217/3107/9528/146894/23673/3119/3115/3122/3136/2322/3111/92421/2060/54918/5663/114885…
BP	GO:1904062	regulation of cation transmembrane transport	299	0.281449	1.58174	5.01228e-05	0.000403922	0.000253871	4364	tags=27%, list=17%, signal=22%	6347/1318/5142/2534/2669/5144/5621/5999/288/2040/2745/5336/65018/3781/1906/51185/1520/10268/1393/287/4067/6324/5997/57817/7779/2273/30845/1193/5311/967/5294/9446/3753/53827/483/3596/53826/5023/729230/5031/5649/57165/79026/11151/11331/2149/23479/6622/126306/3783/9104/4283/387129/6844/6546/59272/6548/2258/2185/801/27075/3208/6769/9474/2316/154/1394/6236/117532/3755/150/3306/28954/351/2056/6786/1813…
BP	GO:0048246	macrophage chemotaxis	34	0.568536	2.18664	5.03003e-05	0.000404822	0.000254437	3295	tags=44%, list=13%, signal=38%	6347/728/7057/1436/6352/719/1910/6441/59341/6288/6504/3958/1240/2185/6348
BP	GO:0045739	positive regulation of DNA repair	70	-0.481804	-1.9588	5.03896e-05	0.000404822	0.000254437	5313	tags=49%, list=21%, signal=38%	5111/1054/2140/9025/11284/196528/8607/5932/1660/2187/2138/86/6944/7515/2521/5591/51720/4862/23126/142/83933/10155/1663/672/84501/10635/55929/8914/54799/2305/57634/10902/8295/150275
BP	GO:0016042	lipid catabolic process	287	0.288756	1.61463	5.0385e-05	0.000404822	0.000254437	4306	tags=27%, list=17%, signal=23%	22933/1544/345557/3949/3553/51302/23417/5322/3290/2639/55862/5336/1576/1545/57733/10999/1592/313/8529/33/84693/158584/5048/51170/5294/549/6609/6783/10449/2517/6716/1666/5095/285148/6342/160428/6715/1376/5320/2108/5051/9651/8228/1962/51099/54363/54905/427/412/1593/38/1066/8310/2110/81579/37/5140/3712/5330/6653/83752/7124/50640/5105/6718/57104/375775/51/51390/11343/79644/30/3990/150/150379/8074/574…
BP	GO:0061614	miRNA transcription	58	0.47317	2.05835	5.04711e-05	0.000405061	0.000254587	3338	tags=38%, list=13%, signal=33%	9314/2353/1958/3725/4609/3091/4804/4091/84913/2113/5460/2247/6774/7490/5970/8061/2627/2625/7376/6688/7124/11006
BP	GO:0006869	lipid transport	336	0.268698	1.53112	5.0529e-05	0.000405111	0.000254618	6084	tags=37%, list=24%, signal=28%	114897/5359/7057/3949/3553/5322/319/654/81537/5443/8600/114876/301/57088/80765/706/1906/10999/1191/3931/8529/23130/148229/114879/4824/5360/57194/4481/28234/58488/366/65977/185/1080/10350/9525/57048/6342/3783/51703/6554/10599/9227/5947/1376/5306/5320/114885/6850/5020/26154/376497/1066/286410/10802/286046/81579/1071/7376/79895/2180/4790/26020/1622/50640/6578/2170/8273/1394/1582/114884/4018/57198/10…
MF	GO:0001618	virus receptor activity	67	0.437978	1.94664	5.10331e-05	0.000408734	0.000256896	3146	tags=33%, list=13%, signal=29%	1604/1969/975/5359/942/3949/1949/7852/558/339390/920/4684/10332/6504/6404/6554/3383/3695/1378/59272/3694/3416
CC	GO:0030880	RNA polymerase complex	85	-0.450829	-1.88447	5.16121e-05	0.00041295	0.000259545	5343	tags=41%, list=21%, signal=33%	51728/11036/84172/10621/10629/6877/2957/5558/5441/2960/138474/51616/79871/5435/6908/8464/5557/5433/5439/23168/6884/55703/5437/6872/11128/4172/2071/2968/123169/6874/171568/5422/23649/9400/8295
BP	GO:0034501	protein localization to kinetochore	13	-0.779956	-2.10833	5.20379e-05	0.000415508	0.000261153	2954	tags=69%, list=12%, signal=61%	55055/55920/27085/55166/7272/81620/9212/10403/9735
BP	GO:1903083	protein localization to condensed chromosome	13	-0.779956	-2.10833	5.20379e-05	0.000415508	0.000261153	2954	tags=69%, list=12%, signal=61%	55055/55920/27085/55166/7272/81620/9212/10403/9735
BP	GO:0043277	apoptotic cell clearance	50	0.481603	2.00722	5.30593e-05	0.000423231	0.000266007	3718	tags=38%, list=15%, signal=32%	6347/7057/2220/558/301/8685/718/8547/7052/5880/2219/7305/391/729230/286046/2621/720/721/375033
BP	GO:0045471	response to ethanol	116	0.372853	1.84526	5.36746e-05	0.000427704	0.000268819	3323	tags=28%, list=13%, signal=25%	4609/2534/6279/1621/939/1571/6916/54658/5999/1393/595/1536/5997/57817/847/6915/3596/929/130/2059/841/210/6554/329/6648/2625/5741/18/2904/2185/4255/4129/7124
BP	GO:0010639	negative regulation of organelle organization	299	-0.331196	-1.62496	5.53209e-05	0.000440374	0.000276782	3889	tags=27%, list=15%, signal=23%	23671/2764/10919/56155/90167/28978/167227/829/10493/54434/6840/7037/79929/84260/55055/652/7515/10193/51332/5062/8658/7429/51750/8195/27085/57143/6709/4591/85358/6714/375189/1111/142/26471/11130/55226/55486/3192/9319/7756/10198/55755/4085/10111/672/699/9232/26271/9031/26586/9700/57731/22974/27166/7272/585/55254/3925/891/347240/51256/81620/551/1063/54552/9212/10403/4171/830/9735/57551/10075/7517/49…
BP	GO:0007080	mitotic metaphase plate congression	44	-0.549642	-2.01871	5.59262e-05	0.000444741	0.000279526	2200	tags=39%, list=9%, signal=35%	81930/3837/10726/27436/3192/9928/11004/83540/1062/891/81620/113130/9212/10403/55143/3833/8697
BP	GO:0071375	cellular response to peptide hormone stimulus	267	0.288369	1.61016	5.60289e-05	0.000445106	0.000279755	5137	tags=34%, list=20%, signal=28%	9021/1398/4780/3716/8835/5588/4609/3553/3164/2308/51762/3717/353/1906/23484/1545/10999/677/1393/55022/51141/4067/5791/6774/4149/5872/8651/11031/8615/23191/5970/760/23038/185/4131/896/6715/5166/79746/5925/376497/6844/2529/6548/2203/5140/81565/3416/55625/6653/4790/55777/5105/5327/9734/10580/2729/11132/3638/1394/6772/858/5286/4929/4641/3480/2771/64506/2200/2690/857/6093/2740/8837/2931/54206/23411/98…
BP	GO:0030194	positive regulation of blood coagulation	20	0.666979	2.20815	5.64437e-05	0.000447494	0.000281256	2180	tags=45%, list=9%, signal=41%	4780/7056/7057/5054/7001/2152/6915/2149/10855
BP	GO:1900048	positive regulation of hemostasis	20	0.666979	2.20815	5.64437e-05	0.000447494	0.000281256	2180	tags=45%, list=9%, signal=41%	4780/7056/7057/5054/7001/2152/6915/2149/10855
BP	GO:0070228	regulation of lymphocyte apoptotic process	54	0.489565	2.08217	5.66733e-05	0.000448859	0.000282115	1864	tags=31%, list=7%, signal=29%	5588/695/3091/3575/29124/81704/939/84941/1831/6352/4067/8915/640/972/917/155038/3958
BP	GO:0006910	phagocytosis, recognition	28	0.603537	2.20863	5.72299e-05	0.000452353	0.00028431	4140	tags=50%, list=16%, signal=42%	2220/5322/3543/78989/10584/8547/2219/64581/722/4153/725/721/375033/3929
BP	GO:0002577	regulation of antigen processing and presentation	20	0.666772	2.20747	5.72117e-05	0.000452353	0.00028431	4257	tags=70%, list=17%, signal=58%	6363/6366/7057/10875/1236/10288/7454/972/3111/2213/6556/968/64127/3112
BP	GO:0070227	lymphocyte apoptotic process	72	0.436172	1.96304	5.76886e-05	0.000455519	0.000286301	2536	tags=31%, list=10%, signal=28%	5588/695/3091/3575/29124/81704/939/84941/6194/1831/6352/355/4067/2737/8915/640/972/917/155038/3958/1178/3965
BP	GO:0051701	biological process involved in interaction with host	172	0.332012	1.73264	5.78922e-05	0.000456667	0.000287022	4363	tags=33%, list=17%, signal=28%	1604/4061/1969/975/9023/5359/942/10346/3949/1949/7852/558/8519/8547/51510/2934/339390/920/2219/4684/10332/6504/6520/6609/6404/79720/972/185/325/9525/6614/85363/1508/92421/6554/3383/2060/3695/1378/3965/5091/7405/59272/3694/3416/2621/6950/3434/8692/858/7113/27183/941/3839/57132/857/6737
BP	GO:0050901	leukocyte tethering or rolling	32	0.573612	2.17276	5.84265e-05	0.000459955	0.000289088	3323	tags=47%, list=13%, signal=41%	6366/6387/6402/10164/6401/3676/6403/6404/729230/5724/3695/119/2529/58494/7124
CC	GO:0034399	nuclear periphery	114	-0.417567	-1.81835	5.83959e-05	0.000459955	0.000289088	2523	tags=29%, list=10%, signal=26%	29128/6732/8243/64395/8573/4221/3192/9972/5590/4001/4841/9612/57731/51588/24137/9894/22880/3692/23165/26993/29945/6002/57122/25909/1063/6839/30827/5422/26502/641/22976/9984/790
BP	GO:0032735	positive regulation of interleukin-12 production	40	0.528074	2.11531	5.90845e-05	0.000464434	0.000291903	2773	tags=45%, list=11%, signal=40%	6363/3659/7099/1236/5336/7098/7189/7097/64581/5970/7805/3603/959/3593/3394/6850/3965/51561
BP	GO:0098586	cellular response to virus	69	0.443468	1.99213	5.9114e-05	0.000464434	0.000291903	4266	tags=45%, list=17%, signal=37%	6363/3569/3665/3091/64135/80149/114548/54941/55601/6352/4938/26057/7098/84282/708/1984/11331/329/5450/3965/6397/89870/1654/59067/4790/8780/8638/5452/3456/2537/51284
BP	GO:0031664	regulation of lipopolysaccharide-mediated signaling pathway	22	0.658081	2.25963	6.08168e-05	0.000477332	0.000300011	3590	tags=59%, list=14%, signal=51%	59307/1604/654/9450/245928/7001/23328/23643/7189/11027/85363/7128/4064
MF	GO:0004713	protein tyrosine kinase activity	130	0.362953	1.82585	6.14295e-05	0.000481659	0.00030273	4193	tags=35%, list=17%, signal=30%	5156/1969/3716/695/7010/2534/1949/3702/558/1436/5604/3717/2202/4067/2268/5609/2042/640/6416/2047/51232/7294/4750/8828/1195/5606/4920/2322/660/7075/7535/27/6850/1859/10114/3055/2044/2185/4915/4145/8798/57410/3932/8576/3480/7525
MF	GO:0015631	tubulin binding	304	-0.324335	-1.59289	6.20192e-05	0.000485796	0.00030533	4334	tags=28%, list=17%, signal=24%	5058/374654/4134/1780/4133/9371/2332/25809/3834/1729/114327/285331/81624/9217/10844/7411/23095/2010/164395/79929/4733/22983/23291/284076/28981/6902/11076/55920/27229/81930/23394/667/1759/9654/3832/27436/23637/80346/29072/2801/7756/1070/55835/9928/11004/10615/55755/7840/672/81610/9793/57609/84295/9448/147841/22974/23170/1062/23093/24137/585/283431/8851/3925/29127/347240/9493/8480/1063/146909/51203…
BP	GO:0002313	mature B cell differentiation involved in immune response	27	0.611261	2.21201	6.26802e-05	0.000490036	0.000307995	3034	tags=52%, list=12%, signal=46%	3569/5336/602/139818/159296/2213/1378/9452/3394/5450/55619/59067/2185/6688
BP	GO:0055017	cardiac muscle tissue growth	64	0.443968	1.95029	6.26856e-05	0.000490036	0.000307995	5781	tags=48%, list=23%, signal=37%	7472/5999/5292/1906/23414/10611/148/5997/57817/2296/60485/2247/7048/23493/7049/2627/10413/65009/10370/5728/8470/221476/3479/2931/57493/6909/26281/7528/5950/7042/1432
BP	GO:0000387	spliceosomal snRNP assembly	32	-0.598469	-2.02487	6.40442e-05	0.000500158	0.000314357	3611	tags=53%, list=14%, signal=46%	25929/6633/79833/27339/9733/6631/10419/6628/6634/6636/57819/6635/9129/26121/6637/8161/25804
[truncated: 1,457 more rows]
