# Supplementary material for: Exploring key biomarkers of liver fibrosis progression to hepatocellular carcinoma based on immune cell-related genes
Source: Research Square preprint supplement (doi:10.21203/rs.3.rs-6479983/v1), 2025-05-21
Supplement: Supplementary file 4 [file 4ec4fe0459402221246a2f09.xlsx]

## Sheet: GO_mRNA
	ONTOLOGY	ID	Description	GeneRatio	BgRatio	pvalue	p.adjust	qvalue	geneID	Count
GO:0042632	BP	GO:0042632	cholesterol homeostasis	45038	98/18800	4.72508e-06	4.72508e-06	0.00129221	CETP/LCAT/ACSM3/CYP39A1	4
GO:0055092	BP	GO:0055092	sterol homeostasis	45038	99/18800	4.92025e-06	4.92025e-06	0.00129221	CETP/LCAT/ACSM3/CYP39A1	4
GO:0008203	BP	GO:0008203	cholesterol metabolic process	45038	139/18800	1.88757e-05	1.88757e-05	0.00296612	CETP/LCAT/CYP1A2/CYP39A1	4
GO:1902652	BP	GO:1902652	secondary alcohol metabolic process	45038	149/18800	2.48048e-05	2.48048e-05	0.00296612	CETP/LCAT/CYP1A2/CYP39A1	4
GO:0016125	BP	GO:0016125	sterol metabolic process	45038	154/18800	2.82346e-05	2.82346e-05	0.00296612	CETP/LCAT/CYP1A2/CYP39A1	4
GO:0055088	BP	GO:0055088	lipid homeostasis	45038	173/18800	4.45075e-05	4.45075e-05	0.00389636	CETP/LCAT/ACSM3/CYP39A1	4
GO:0034370	BP	GO:0034370	triglyceride-rich lipoprotein particle remodeling	44979	12/18800	8.56668e-05	8.56668e-05	0.0056247	CETP/LCAT	2
GO:0034372	BP	GO:0034372	very-low-density lipoprotein particle remodeling	44979	12/18800	8.56668e-05	8.56668e-05	0.0056247	CETP/LCAT	2
GO:0034375	BP	GO:0034375	high-density lipoprotein particle remodeling	44979	16/18800	0.000155317	0.000155317	0.00906468	CETP/LCAT	2
GO:0043691	BP	GO:0043691	reverse cholesterol transport	44979	20/18800	0.000245222	0.000245222	0.0128806	CETP/LCAT	2
GO:0006706	BP	GO:0006706	steroid catabolic process	44979	27/18800	0.000450772	0.000450772	0.0209153	CYP1A2/CYP39A1	2
GO:0008202	BP	GO:0008202	steroid metabolic process	45038	323/18800	0.000489849	0.000489849	0.0209153	CETP/LCAT/CYP1A2/CYP39A1	4
GO:0034368	BP	GO:0034368	protein-lipid complex remodeling	44979	30/18800	0.000557463	0.000557463	0.0209153	CETP/LCAT	2
GO:0034369	BP	GO:0034369	plasma lipoprotein particle remodeling	44979	30/18800	0.000557463	0.000557463	0.0209153	CETP/LCAT	2
GO:0034367	BP	GO:0034367	protein-containing complex remodeling	44979	32/18800	0.000634736	0.000634736	0.0222269	CETP/LCAT	2
GO:0006066	BP	GO:0006066	alcohol metabolic process	45038	361/18800	0.000743775	0.000743775	0.0244173	CETP/LCAT/CYP1A2/CYP39A1	4
GO:0009403	BP	GO:0009403	toxin biosynthetic process	44948	1/18800	0.00117021	0.00117021	0.0329682	CYP1A2	1
GO:0071306	BP	GO:0071306	cellular response to vitamin E	44948	1/18800	0.00117021	0.00117021	0.0329682	COL1A1	1
GO:0010171	BP	GO:0010171	body morphogenesis	44979	45/18800	0.0012553	0.0012553	0.0329682	GPC3/COL1A1	2
GO:0071827	BP	GO:0071827	plasma lipoprotein particle organization	44979	45/18800	0.0012553	0.0012553	0.0329682	CETP/LCAT	2
GO:0071825	BP	GO:0071825	protein-lipid complex subunit organization	44979	48/18800	0.00142725	0.00142725	0.0356991	CETP/LCAT	2
GO:0072330	BP	GO:0072330	monocarboxylic acid biosynthetic process	45007	215/18800	0.0019346	0.0019346	0.0461897	ACSM3/CYP1A2/CYP39A1	3
GO:0006045	BP	GO:0006045	N-acetylglucosamine biosynthetic process	44948	2/18800	0.00233912	0.00233912	0.0472559	GNE	1
GO:1901073	BP	GO:1901073	glucosamine-containing compound biosynthetic process	44948	2/18800	0.00233912	0.00233912	0.0472559	GNE	1
GO:1902618	BP	GO:1902618	cellular response to fluoride	44948	2/18800	0.00233912	0.00233912	0.0472559	COL1A1	1
GO:1903378	BP	GO:1903378	positive regulation of oxidative stress-induced neuron intrinsic apoptotic signaling pathway	44948	2/18800	0.00233912	0.00233912	0.0472559	MCL1	1
GO:0034364	CC	GO:0034364	high-density lipoprotein particle	44979	27/19594	0.000415277	0.000415277	0.00503437	CETP/LCAT	2
GO:0034358	CC	GO:0034358	plasma lipoprotein particle	44979	36/19594	0.000740822	0.000740822	0.00503437	CETP/LCAT	2
GO:1990777	CC	GO:1990777	lipoprotein particle	44979	36/19594	0.000740822	0.000740822	0.00503437	CETP/LCAT	2
GO:0032994	CC	GO:0032994	protein-lipid complex	44979	39/19594	0.000869573	0.000869573	0.00503437	CETP/LCAT	2
GO:0005584	CC	GO:0005584	collagen type I trimer	44948	2/19594	0.00224438	0.00224438	0.010395	COL1A1	1
GO:0005581	CC	GO:0005581	collagen trimer	44979	86/19594	0.0041545	0.0041545	0.0160349	COL1A1/MARCO	2
GO:0005579	CC	GO:0005579	membrane attack complex	44948	7/19594	0.00783432	0.00783432	0.0258488	C9	1
GO:0097136	CC	GO:0097136	Bcl-2 family protein complex	44948	8/19594	0.00894871	0.00894871	0.0258488	MCL1	1
GO:0018995	CC	GO:0018995	host cellular component	44948	10/19594	0.0111739	0.0111739	0.0258488	CLEC4M	1
GO:0043657	CC	GO:0043657	host cell	44948	10/19594	0.0111739	0.0111739	0.0258488	CLEC4M	1
GO:0005583	CC	GO:0005583	fibrillar collagen trimer	44948	12/19594	0.0133944	0.0133944	0.0258488	COL1A1	1
GO:0098643	CC	GO:0098643	banded collagen fibril	44948	12/19594	0.0133944	0.0133944	0.0258488	COL1A1	1
GO:0098644	CC	GO:0098644	complex of collagen trimers	44948	22/19594	0.0244253	0.0244253	0.0435107	COL1A1	1
GO:0046930	CC	GO:0046930	pore complex	44948	26/19594	0.0288047	0.0288047	0.0476468	C9	1
GO:0005942	CC	GO:0005942	phosphatidylinositol 3-kinase complex	44948	29/19594	0.0320769	0.0320769	0.0495222	SOCS2	1
GO:0005537	MF	GO:0005537	mannose binding	44979	22/18410	0.00031037	0.00031037	0.00609597	CLEC4M/CLEC4G	2
GO:0008395	MF	GO:0008395	steroid hydroxylase activity	44979	38/18410	0.000933673	0.000933673	0.00609597	CYP1A2/CYP39A1	2
GO:0016712	MF	GO:0016712	oxidoreductase activity, acting on paired donors, with incorporation or reduction of molecular oxygen, reduced flavin or flavoprotein as one donor, and incorporation of one atom of oxygen	44979	40/18410	0.00103444	0.00103444	0.00609597	CYP1A2/CYP39A1	2
GO:0004607	MF	GO:0004607	phosphatidylcholine-sterol O-acyltransferase activity	44948	1/18410	0.001195	0.001195	0.00609597	LCAT	1
GO:0008269	MF	GO:0008269	JAK pathway signal transduction adaptor activity	44948	1/18410	0.001195	0.001195	0.00609597	SOCS2	1
GO:0008387	MF	GO:0008387	steroid 7-alpha-hydroxylase activity	44948	1/18410	0.001195	0.001195	0.00609597	CYP39A1	1
GO:0008761	MF	GO:0008761	UDP-N-acetylglucosamine 2-epimerase activity	44948	1/18410	0.001195	0.001195	0.00609597	GNE	1
GO:0009384	MF	GO:0009384	N-acylmannosamine kinase activity	44948	1/18410	0.001195	0.001195	0.00609597	GNE	1
GO:0018729	MF	GO:0018729	propionate CoA-transferase activity	44948	1/18410	0.001195	0.001195	0.00609597	ACSM3	1
GO:0043759	MF	GO:0043759	methylbutanoate-CoA ligase activity	44948	1/18410	0.001195	0.001195	0.00609597	ACSM3	1
GO:0060422	MF	GO:0060422	peptidyl-dipeptidase inhibitor activity	44948	1/18410	0.001195	0.001195	0.00609597	GPC3	1
GO:0070009	MF	GO:0070009	serine-type aminopeptidase activity	44948	1/18410	0.001195	0.001195	0.00609597	F11	1
GO:0120274	MF	GO:0120274	virus coreceptor activity	44948	1/18410	0.001195	0.001195	0.00609597	CLEC4G	1
GO:0016747	MF	GO:0016747	acyltransferase activity, transferring groups other than amino-acyl groups	45007	218/18410	0.00213579	0.00213579	0.0101169	LCAT/ACSM3/NAT2	3
GO:0008396	MF	GO:0008396	oxysterol 7-alpha-hydroxylase activity	44948	2/18410	0.00238864	0.00238864	0.0105603	CYP39A1	1
GO:0016746	MF	GO:0016746	acyltransferase activity	45007	244/18410	0.00293951	0.00293951	0.0107994	LCAT/ACSM3/NAT2	3
GO:0048029	MF	GO:0048029	monosaccharide binding	44979	71/18410	0.00322262	0.00322262	0.0107994	CLEC4M/CLEC4G	2
GO:0004060	MF	GO:0004060	arylamine N-acetyltransferase activity	44948	3/18410	0.00358092	0.00358092	0.0107994	NAT2	1
GO:0030369	MF	GO:0030369	ICAM-3 receptor activity	44948	3/18410	0.00358092	0.00358092	0.0107994	CLEC4M	1
GO:0033782	MF	GO:0033782	24-hydroxycholesterol 7alpha-hydroxylase activity	44948	3/18410	0.00358092	0.00358092	0.0107994	CYP39A1	1
GO:0140081	MF	GO:0140081	glycosylated region protein binding	44948	3/18410	0.00358092	0.00358092	0.0107994	CLEC4G	1
GO:0001618	MF	GO:0001618	virus receptor activity	44979	76/18410	0.00368264	0.00368264	0.0107994	CLEC4M/CLEC4G	2
GO:0140272	MF	GO:0140272	exogenous protein binding	44979	77/18410	0.00377812	0.00377812	0.0107994	CLEC4M/CLEC4G	2
GO:0030246	MF	GO:0030246	carbohydrate binding	45007	270/18410	0.00390834	0.00390834	0.0107994	CLEC4M/CLEC4G/CLEC1B	3
GO:0033695	MF	GO:0033695	oxidoreductase activity, acting on CH or CH2 groups, quinone or similar compound as acceptor	44948	4/18410	0.00477184	0.00477184	0.0112136	CYP1A2	1
GO:0034875	MF	GO:0034875	caffeine oxidase activity	44948	4/18410	0.00477184	0.00477184	0.0112136	CYP1A2	1
GO:0047179	MF	GO:0047179	platelet-activating factor acetyltransferase activity	44948	4/18410	0.00477184	0.00477184	0.0112136	LCAT	1
GO:0050218	MF	GO:0050218	propionate-CoA ligase activity	44948	4/18410	0.00477184	0.00477184	0.0112136	ACSM3	1
GO:0016407	MF	GO:0016407	acetyltransferase activity	44979	88/18410	0.00490372	0.00490372	0.0112136	LCAT/NAT2	2
GO:0004530	MF	GO:0004530	deoxyribonuclease I activity	44948	5/18410	0.0059614	0.0059614	0.0116275	DNASE1L3	1
GO:0008410	MF	GO:0008410	CoA-transferase activity	44948	5/18410	0.0059614	0.0059614	0.0116275	ACSM3	1
GO:0017129	MF	GO:0017129	triglyceride binding	44948	5/18410	0.0059614	0.0059614	0.0116275	CETP	1
GO:0034186	MF	GO:0034186	apolipoprotein A-I binding	44948	5/18410	0.0059614	0.0059614	0.0116275	LCAT	1
GO:0101021	MF	GO:0101021	estrogen 2-hydroxylase activity	44948	5/18410	0.0059614	0.0059614	0.0116275	CYP1A2	1
GO:0004497	MF	GO:0004497	monooxygenase activity	44979	103/18410	0.00665676	0.00665676	0.0126128	CYP1A2/CYP39A1	2
GO:0051434	MF	GO:0051434	BH3 domain binding	44948	6/18410	0.0071496	0.0071496	0.0128144	MCL1	1
GO:0070061	MF	GO:0070061	fructose binding	44948	6/18410	0.0071496	0.0071496	0.0128144	CLEC4G	1
GO:0004321	MF	GO:0004321	fatty-acyl-CoA synthase activity	44948	7/18410	0.00833644	0.00833644	0.0141753	ACSM3	1
GO:0106256	MF	GO:0106256	hydroperoxy icosatetraenoate dehydratase activity	44948	7/18410	0.00833644	0.00833644	0.0141753	CYP1A2	1
GO:0003847	MF	GO:0003847	1-alkyl-2-acetylglycerophosphocholine esterase activity	44948	8/18410	0.00952194	0.00952194	0.0154013	LCAT	1
GO:0101020	MF	GO:0101020	estrogen 16-alpha-hydroxylase activity	44948	8/18410	0.00952194	0.00952194	0.0154013	CYP1A2	1
GO:0016725	MF	GO:0016725	oxidoreductase activity, acting on CH or CH2 groups	44948	9/18410	0.0107061	0.0107061	0.0157774	CYP1A2	1
GO:0031956	MF	GO:0031956	medium-chain fatty acid-CoA ligase activity	44948	9/18410	0.0107061	0.0107061	0.0157774	ACSM3	1
GO:0047760	MF	GO:0047760	butyrate-CoA ligase activity	44948	9/18410	0.0107061	0.0107061	0.0157774	ACSM3	1
GO:0051400	MF	GO:0051400	BH domain binding	44948	9/18410	0.0107061	0.0107061	0.0157774	MCL1	1
GO:0020037	MF	GO:0020037	heme binding	44979	139/18410	0.011843	0.011843	0.0164254	CYP1A2/CYP39A1	2
GO:0005131	MF	GO:0005131	growth hormone receptor binding	44948	10/18410	0.0118889	0.0118889	0.0164254	SOCS2	1
GO:0070008	MF	GO:0070008	serine-type exopeptidase activity	44948	10/18410	0.0118889	0.0118889	0.0164254	F11	1
GO:0016857	MF	GO:0016857	racemase and epimerase activity, acting on carbohydrates and derivatives	44948	11/18410	0.0130703	0.0130703	0.0169954	GNE	1
GO:0048407	MF	GO:0048407	platelet-derived growth factor binding	44948	11/18410	0.0130703	0.0130703	0.0169954	COL1A1	1
GO:0070513	MF	GO:0070513	death domain binding	44948	11/18410	0.0130703	0.0130703	0.0169954	MCL1	1
GO:0046906	MF	GO:0046906	tetrapyrrole binding	44979	149/18410	0.0135173	0.0135173	0.0172387	CYP1A2/CYP39A1	2
GO:0005506	MF	GO:0005506	iron ion binding	44979	151/18410	0.0138639	0.0138639	0.0173471	CYP1A2/CYP39A1	2
GO:0046790	MF	GO:0046790	virion binding	44948	12/18410	0.0142504	0.0142504	0.0175005	CLEC4M	1
GO:0016888	MF	GO:0016888	endodeoxyribonuclease activity, producing 5'-phosphomonoesters	44948	15/18410	0.0177826	0.0177826	0.0214412	DNASE1L3	1
GO:0016705	MF	GO:0016705	oxidoreductase activity, acting on paired donors, with incorporation or reduction of molecular oxygen	44979	177/18410	0.018715	0.018715	0.0216753	CYP1A2/CYP39A1	2
GO:0005159	MF	GO:0005159	insulin-like growth factor receptor binding	44948	16/18410	0.0189573	0.0189573	0.0216753	SOCS2	1
GO:0046935	MF	GO:0046935	1-phosphatidylinositol-3-kinase regulator activity	44948	16/18410	0.0189573	0.0189573	0.0216753	SOCS2	1
GO:0016854	MF	GO:0016854	racemase and epimerase activity	44948	17/18410	0.0201307	0.0201307	0.0226268	GNE	1
GO:0034185	MF	GO:0034185	apolipoprotein binding	44948	18/18410	0.0213027	0.0213027	0.0235451	LCAT	1
GO:0035014	MF	GO:0035014	phosphatidylinositol 3-kinase regulator activity	44948	19/18410	0.0224734	0.0224734	0.0244318	SOCS2	1
GO:0016408	MF	GO:0016408	C-acyltransferase activity	44948	20/18410	0.0236427	0.0236427	0.0252885	ACSM3	1
GO:0019200	MF	GO:0019200	carbohydrate kinase activity	44948	21/18410	0.0248107	0.0248107	0.0261017	GNE	1
GO:0008320	MF	GO:0008320	protein transmembrane transporter activity	44948	22/18410	0.0259774	0.0259774	0.0261017	MCL1	1
GO:0015645	MF	GO:0015645	fatty acid ligase activity	44948	22/18410	0.0259774	0.0259774	0.0261017	ACSM3	1
GO:0120020	MF	GO:0120020	cholesterol transfer activity	44948	22/18410	0.0259774	0.0259774	0.0261017	CETP	1
GO:0120015	MF	GO:0120015	sterol transfer activity	44948	23/18410	0.0271428	0.0271428	0.0268656	CETP	1
GO:0005540	MF	GO:0005540	hyaluronic acid binding	44948	24/18410	0.0283068	0.0283068	0.0276057	LYVE1	1
GO:0030247	MF	GO:0030247	polysaccharide binding	44948	25/18410	0.0294695	0.0294695	0.0279185	CLEC4G	1
GO:0070330	MF	GO:0070330	aromatase activity	44948	25/18410	0.0294695	0.0294695	0.0279185	CYP1A2	1
GO:0038187	MF	GO:0038187	pattern recognition receptor activity	44948	26/18410	0.0306309	0.0306309	0.0284897	MARCO	1
GO:0005539	MF	GO:0005539	glycosaminoglycan binding	44979	234/18410	0.0314436	0.0314436	0.0284897	LYVE1/F11	2
GO:0016405	MF	GO:0016405	CoA-ligase activity	44948	27/18410	0.0317909	0.0317909	0.0284897	ACSM3	1
GO:0022884	MF	GO:0022884	macromolecule transmembrane transporter activity	44948	27/18410	0.0317909	0.0317909	0.0284897	MCL1	1
GO:0046966	MF	GO:0046966	nuclear thyroid hormone receptor binding	44948	29/18410	0.034107	0.034107	0.0301578	NCOR1	1
GO:0016878	MF	GO:0016878	acid-thiol ligase activity	44948	31/18410	0.0364178	0.0364178	0.0309625	ACSM3	1
GO:0031210	MF	GO:0031210	phosphatidylcholine binding	44948	31/18410	0.0364178	0.0364178	0.0309625	CETP	1
GO:0140318	MF	GO:0140318	protein transporter activity	44948	31/18410	0.0364178	0.0364178	0.0309625	MCL1	1
GO:0051427	MF	GO:0051427	hormone receptor binding	44948	32/18410	0.0375712	0.0375712	0.0315388	SOCS2	1
GO:0004623	MF	GO:0004623	phospholipase A2 activity	44948	34/18410	0.0398741	0.0398741	0.0326455	LCAT	1
GO:0016229	MF	GO:0016229	steroid dehydrogenase activity	44948	34/18410	0.0398741	0.0398741	0.0326455	HSD17B13	1
GO:0015248	MF	GO:0015248	sterol transporter activity	44948	36/18410	0.0421718	0.0421718	0.0341055	CETP	1
GO:0004520	MF	GO:0004520	endodeoxyribonuclease activity	44948	37/18410	0.0433186	0.0433186	0.0341989	DNASE1L3	1
GO:0042605	MF	GO:0042605	peptide antigen binding	44948	37/18410	0.0433186	0.0433186	0.0341989	CLEC4M	1
GO:0004177	MF	GO:0004177	aminopeptidase activity	44948	39/18410	0.0456084	0.0456084	0.0351693	F11	1
GO:0050997	MF	GO:0050997	quaternary ammonium group binding	44948	39/18410	0.0456084	0.0456084	0.0351693	CETP	1
GO:0032451	MF	GO:0032451	demethylase activity	44948	40/18410	0.0467513	0.0467513	0.0356362	CYP1A2	1
GO:0016877	MF	GO:0016877	ligase activity, forming carbon-sulfur bonds	44948	41/18410	0.0478929	0.0478929	0.035686	ACSM3	1
GO:0030020	MF	GO:0030020	extracellular matrix structural constituent conferring tensile strength	44948	41/18410	0.0478929	0.0478929	0.035686	COL1A1	1
