# Supplementary material for: Exploring key biomarkers of liver fibrosis progression to hepatocellular carcinoma based on immune cell-related genes
Source: Research Square preprint supplement (doi:10.21203/rs.3.rs-6479983/v1), 2025-05-21
Supplement: Supplementary file 5 [file 66eb61496dfe856fd246de18.xlsx]

## Sheet: LYVE1.KEGGgsea
ID	Description	setSize	enrichmentScore	NES	pvalue	p.adjust	qvalue	rank	leading_edge	core_enrichment
hsa04610	Complement and coagulation cascades	84	0.657013	2.93048	1e-10	1.85e-09	9.00585e-10	4092	tags=54%, list=16%, signal=45%	730/1675/11326/2152/713/1378/715/712/1604/714/7056/2/710/716/728/3426/735/5627/719/2160/4153/2158/5648/2149/729/2159/1191/10747/5327/10544/722/3689/7450/10878/3075/2157/5340/3818/1361/3684/3078/731/2244/10877/5329
hsa05332	Graft-versus-host disease	41	0.760359	2.90737	1e-10	1.85e-09	9.00585e-10	4783	tags=78%, list=19%, signal=63%	3824/5551/942/3553/3002/3133/3125/356/355/3821/3106/3115/3113/3804/3122/3134/3111/3117/3569/3802/3109/3812/3126/941/3811/7124/3119/115653/57292/3108/940/3112
hsa05144	Malaria	45	0.724677	2.80263	1e-10	1.85e-09	9.00585e-10	2273	tags=51%, list=9%, signal=47%	1378/3820/3040/3043/6403/975/3082/2995/4615/6347/7099/7057/3553/7043/4035/7097/948/6401/959/3689/7412/5175/3569
hsa04640	Hematopoietic cell lineage	95	0.600525	2.73591	1e-10	1.85e-09	9.00585e-10	3797	tags=52%, list=15%, signal=44%	920/1436/912/1378/945/1604/3554/925/929/3815/3553/3568/3575/1441/960/2057/3125/948/4311/952/915/2322/3115/914/916/3113/2056/3122/951/3111/3117/3569/3109/3566/3565/924/3126/3676/2323/2811/3559/3690/7124/3574/3684/3119/921/911/917
hsa00830	Retinol metabolism	63	0.652292	2.69537	1e-10	1.85e-09	9.00585e-10	2593	tags=46%, list=10%, signal=41%	9227/125/1544/316/5959/220/127/54658/54657/1576/124/1559/1592/1555/128/54884/10170/8608/1549/130/7365/1558/54659/126/9249/1543/8228/1548/216
hsa05321	Inflammatory bowel disease	65	0.636216	2.65731	1e-10	1.85e-09	9.00585e-10	3524	tags=48%, list=14%, signal=41%	8809/4094/8807/7099/3459/3553/7043/6774/7097/3125/3594/6095/2625/6775/4772/3115/3113/3122/3111/3117/3725/3569/3109/3566/3565/6778/3126/4790/7124/3593/3119
hsa05150	Staphylococcus aureus infection	89	0.591697	2.6521	1e-10	1.85e-09	9.00585e-10	4870	tags=53%, list=19%, signal=43%	1675/2357/2358/713/715/712/6403/714/716/1668/2359/1667/728/3426/719/2212/820/3125/4153/5648/2215/3115/10747/3113/2213/3122/3111/342574/3689/3117/3109/6404/1669/3075/3126/5340/3684/3119/8688/5724/25984/3880/3108/2209/3882/3112/125115
hsa04060	Cytokine-cytokine receptor interaction	277	0.496533	2.62622	1e-10	1.85e-09	9.00585e-10	3663	tags=33%, list=15%, signal=28%	6387/2658/6368/3977/1230/90865/654/6359/920/10148/3587/8809/9547/1436/653/9173/3554/8807/7133/269/94/7132/7048/4804/6352/8742/10663/659/6347/6369/3459/3553/4803/6366/6363/3568/3575/7043/92/1441/3560/608/729230/3603/6372/2057/23495/3572/10673/356/939/2690/9560/388372/3594/355/7852/3600/4982/2920/8795/414062/3598/58191/8793/8600/2056/959/3953/3445/3569/2833/3566/3565/6349/6348/1489/944/3455/27242/3…
hsa00982	Drug metabolism - cytochrome P450	66	0.621307	2.60037	1e-10	1.85e-09	9.00585e-10	2474	tags=42%, list=10%, signal=38%	2327/1571/125/2949/1544/2947/316/127/54658/54657/1576/2950/124/1559/1555/128/2946/2328/1549/130/4129/7365/1558/54659/126/1565/9446/1548
hsa04380	Osteoclast differentiation	124	0.552455	2.59067	1e-10	1.85e-09	9.00585e-10	4322	tags=52%, list=17%, signal=44%	10990/353514/10288/1436/11027/3554/2534/695/7132/7048/9021/10379/3726/2274/3459/5602/3553/2354/5293/653361/7305/3937/2353/2212/4689/5609/8061/2215/11025/4982/6688/4772/11026/5336/5530/8600/1535/2213/3716/3725/5295/3932/140885/207/5533/11024/1540/11006/23547/6850/7189/5604/4790/10326/3455/3690/7124/3456/1385/3551/2355/3454/126014/55423/5532
hsa04061	Viral protein interaction with cytokine and cytokine receptor	91	0.571042	2.56861	1e-10	1.85e-09	9.00585e-10	4311	tags=44%, list=17%, signal=37%	6387/6368/1230/6359/3587/8809/9547/1436/8807/7133/7132/6352/6347/6369/6366/6363/3560/729230/6372/3572/9560/388372/7852/2920/8795/414062/8793/3569/2833/6349/6348/3559/7124/6362/10803/6357/3588/1236/1232/6360
hsa04110	Cell cycle	140	-0.567116	-2.50747	1e-10	1.85e-09	9.00585e-10	2544	tags=46%, list=10%, signal=41%	5111/7027/1387/27127/10459/3065/29882/1030/1017/701/10971/5933/7709/64682/7534/2932/1871/4087/9088/1019/51433/8317/51434/5885/1663/10274/993/5525/9700/990/4174/10403/27085/898/5528/2810/995/26271/5591/6502/4175/1029/8697/51529/4085/1111/1870/81620/9319/4172/9134/994/4173/4176/4171/699/891/9212/890/9232/9133/7272/991/113130
hsa05142	Chagas disease	100	0.541719	2.48567	1e-10	1.85e-09	9.00585e-10	3797	tags=49%, list=15%, signal=42%	9630/713/712/714/2775/7132/7048/6352/4615/6347/7099/919/3459/5602/3553/5293/55844/7043/2353/7097/356/5330/355/8837/107/414062/915/6416/916/5516/2773/3725/5295/3569/207/5521/6349/6348/2769/7189/4790/10333/5332/54106/7124/3593/3456/2771/917
hsa04659	Th17 cell differentiation	107	0.534422	2.46782	1e-10	1.85e-09	9.00585e-10	4122	tags=44%, list=16%, signal=37%	920/10148/3554/7048/919/3459/5602/3553/3560/2353/6774/3091/3572/3125/3594/3717/6095/3662/2625/7535/4772/915/5530/3115/916/3113/3122/3111/3117/3716/3725/5588/3569/3932/3109/5533/3566/3565/6778/3126/4790/3559/3556/3119/917/3551/3108
hsa04514	Cell adhesion molecules	147	0.494151	2.41972	1e-10	1.85e-09	9.00585e-10	4122	tags=41%, list=16%, signal=34%	3680/920/4684/6614/6403/5010/57689/925/942/9071/1003/10666/58494/6402/9075/79679/3385/3133/9378/3384/3125/80380/6401/4685/3106/3115/9073/914/923/3113/7122/959/3122/3134/3111/3689/3117/7412/5175/8516/3109/83700/9379/6404/5788/5797/1013/54413/3126/3676/941/3684/23562/3119/90952/4756/57555/23308/57502/3108
hsa05171	Coronavirus disease - COVID-19	219	0.472184	2.4153	1e-10	1.85e-09	9.00585e-10	5180	tags=46%, list=21%, signal=37%	730/1675/713/715/185/712/6403/714/7132/716/4615/6189/9349/10379/728/6347/7099/5602/114548/3553/735/1536/4939/5293/834/719/7098/2353/6774/2212/9045/6234/6125/6137/3572/7097/51311/4153/6154/64135/5648/6168/729/6122/5336/6194/6133/10747/6129/23521/4600/4599/4938/6207/6166/3716/7450/3725/6146/3445/5295/3569/8829/6144/6235/6850/7189/7113/4790/6210/59272/3455/6130/7124/3593/3456/6224/6136/731/2244/6161…
hsa03013	Nucleocytoplasmic transport	95	-0.587704	-2.41475	1e-10	1.85e-09	9.00585e-10	5036	tags=58%, list=20%, signal=46%	6613/3837/23279/9688/80145/65110/23633/22985/6612/81929/22916/79711/9775/23636/84321/59343/10921/7329/51194/9984/23214/79228/7341/10073/9972/4116/10762/55746/2733/348995/65109/23511/3840/8563/26019/25909/5905/7514/23534/22794/8480/55705/23225/57122/4686/9883/79023/9670/79902/11260/3838/57510/1434/9631/23165
hsa03040	Spliceosome	106	-0.566888	-2.3934	1e-10	1.85e-09	9.00585e-10	4486	tags=52%, list=18%, signal=43%	10084/10915/57461/25766/10286/9879/23658/22985/10907/24148/6634/22916/6629/3312/9775/6627/3304/153527/220988/84321/8175/55696/51340/9984/27339/11325/4116/6636/26121/10465/84950/9128/10946/11338/8896/10992/9129/6633/6626/6100/51645/9416/1659/9343/6628/4686/10262/57819/6635/8449/22827/6637/10713/6631/25804
hsa03030	DNA replication	35	-0.755207	-2.59045	1.37253e-10	2.40554e-09	1.17102e-09	2544	tags=80%, list=10%, signal=72%	5426/6742/5558/1763/5111/6119/5982/5981/10714/246243/3978/5422/5985/4174/5557/5424/5983/4175/54107/5427/23649/10535/4172/5984/2237/4173/4176/4171
hsa05330	Allograft rejection	37	0.722876	2.71589	3.25209e-10	5.41473e-09	2.6359e-09	4783	tags=68%, list=19%, signal=55%	5551/942/3002/3133/3125/356/355/3106/3115/3113/959/3122/3134/3111/3117/3109/3565/3126/941/7124/3593/3119/3108/940/3112
hsa05140	Leishmaniasis	71	0.582008	2.48834	4.90332e-10	7.77527e-09	3.78502e-09	3524	tags=49%, list=14%, signal=43%	5743/1378/4615/7099/3459/3553/1536/7043/653361/2353/2212/7097/3125/4689/3717/2215/3115/3113/1535/3122/3111/3689/3117/3716/3725/3109/3565/3126/3676/7189/4790/7124/3593/3684/3119
hsa04658	Th1 and Th2 cell differentiation	92	0.545782	2.45167	7.39912e-10	1.11996e-08	5.45198e-09	4855	tags=50%, list=19%, signal=40%	920/4094/864/919/3459/5602/3560/2353/28514/3125/3594/3717/2625/6775/7535/4772/915/5530/3115/916/3113/3122/3111/3117/3716/3725/5588/3932/3109/5533/3566/3565/6778/3126/84441/4790/3559/3593/3119/917/3551/3108/5532/3596/3112/6777
hsa00980	Metabolism of xenobiotics by cytochrome P450	71	0.578617	2.47385	7.9667e-10	1.15344e-08	5.61497e-09	2474	tags=37%, list=10%, signal=33%	1571/125/2949/1544/2947/127/54658/54657/1576/3290/2950/22977/124/1559/1555/128/2946/1549/130/7365/54659/126/1565/1543/9446/1548
hsa03410	Base excision repair	32	-0.739206	-2.46207	1.34479e-09	1.86589e-08	9.0832e-09	2544	tags=59%, list=10%, signal=53%	5111/7374/23583/4968/4595/6996/10714/27301/328/10038/7515/3978/55247/3980/5424/54107/5427/142/2237
hsa05322	Systemic lupus erythematosus	52	0.620209	2.4924	2.08218e-09	2.77347e-08	1.35013e-08	4783	tags=58%, list=19%, signal=47%	730/713/715/712/714/1511/942/716/735/2212/3125/2215/729/3115/3113/959/3122/3111/3117/3109/3126/941/7124/3119/731/3108/87/2209/940/3112
hsa05204	Chemical carcinogenesis - DNA adducts	65	0.581253	2.42775	3.05366e-09	3.91104e-08	1.9039e-08	4625	tags=46%, list=18%, signal=38%	1571/5743/2949/10/1544/2947/54658/54657/1576/3290/2950/1559/2946/1549/9/7365/1558/54659/1543/64816/9446/1548/2944/6799/1551/1562/7366/4258/6822/6817
hsa04650	Natural killer cell mediated cytotoxicity	127	0.467145	2.2275	3.38042e-09	4.16919e-08	2.02957e-08	3504	tags=41%, list=14%, signal=35%	3824/2534/5551/962/117157/5880/919/3459/2207/3002/5293/7305/3937/3133/3822/4068/10870/3384/356/355/7535/2215/7409/3823/8795/4772/3821/5336/3106/5530/3804/3689/25759/3445/5295/3932/10451/3802/5533/51744/3812/3808/6850/5604/2185/3845/3455/3811/259197/7124/9437/3456
hsa05417	Lipid and atherosclerosis	211	0.395115	2.03228	5.71195e-09	6.79314e-08	3.30692e-08	3609	tags=36%, list=14%, signal=31%	6403/7132/6352/4780/4615/4846/6347/7099/929/5602/114548/3553/1536/5293/834/653361/2353/6774/1559/7097/356/5330/4689/2081/1555/3306/948/3717/355/5609/6401/596/7409/2920/8795/4772/414062/7436/5530/6416/1549/3665/816/23643/1558/1535/959/9451/3725/5452/4067/3445/7412/5295/3569/1543/10451/468/207/5533/1548/6349/3949/6348/337/7189/4790/3845/10333/5332/335/7124/3593/3456/5606
hsa00071	Fatty acid degradation	41	0.673285	2.57443	6.15496e-09	7.06759e-08	3.44052e-08	4599	tags=63%, list=18%, signal=52%	113612/125/51703/2639/127/217/124/2180/128/37/219/130/126/10449/30/33/3033/35/1376/1962/224/34/38/3032/36/23305
hsa04062	Chemokine signaling pathway	184	0.414921	2.10474	8.49538e-09	9.42987e-08	4.59049e-08	4981	tags=43%, list=20%, signal=35%	6387/6368/1230/6359/9547/2869/2791/1398/54331/6352/5880/10663/6347/6369/3702/6366/6363/3055/5293/653361/1794/10235/23533/6774/5294/729230/6372/5330/9560/388372/3717/7454/7852/2268/7409/107/2920/414062/5336/58191/113/2773/25759/4067/94235/408/5295/10451/207/2833/109/6349/6348/57580/5604/55970/4790/2185/3845/5332/6362/5567/10803/59345/6357/2771/1236/3551/1232/6360/2788/2309/7074/2868/10000/409/6777…
hsa04611	Platelet activation	114	0.477774	2.21293	1.26156e-08	1.35516e-07	6.59694e-08	3901	tags=38%, list=16%, signal=32%	6915/64805/6916/2534/695/4846/10125/2207/5293/4638/3937/10235/23533/2212/5294/5739/5023/5330/107/2149/5336/8773/113/2773/7450/10672/4067/5295/207/83706/109/4659/5593/23365/5742/6850/2811/3690/5332/5567/2771/2244/6786
hsa05014	Amyotrophic lateral sclerosis	302	-0.38772	-1.86215	1.30752e-08	1.36064e-07	6.62364e-08	4845	tags=37%, list=19%, signal=31%	572/1649/5700/23279/9688/1350/9782/836/637/1770/5608/5534/4723/7384/5714/7278/2906/8878/7846/7280/5704/5706/5717/5682/10213/5535/4741/4711/57679/4696/5715/3309/5600/8408/64837/81929/3799/5719/64446/5689/10540/4713/581/7381/23636/11047/60/27019/220988/6311/54539/5690/1340/5709/9001/1329/1337/84701/4698/84516/4728/5686/9972/29979/10762/55746/5702/2733/1345/5687/348995/56901/170712/4702/1347/11273/3…
hsa05145	Toxoplasmosis	107	0.481957	2.22555	1.68887e-08	1.70422e-07	8.2962e-08	4122	tags=41%, list=16%, signal=35%	3587/10319/3908/2775/7132/4615/7099/3459/5602/7043/23533/6774/5294/7097/3125/3306/3717/596/240/3115/23643/3113/959/3913/3122/3111/2773/3117/3716/207/3109/3949/3126/7189/4790/7124/3593/3119/5606/2771/3912/3588/3551/3108
hsa05016	Huntington disease	256	-0.397151	-1.88644	2.84888e-08	2.79023e-07	1.35829e-07	5716	tags=40%, list=23%, signal=31%	5694/5718/7419/5436/4709/6391/347688/4722/55967/7350/5438/1173/5700/1350/836/1770/4723/7384/1211/5714/7278/7846/7280/3092/5704/5706/5717/5682/10213/4711/23236/5441/4696/5715/8408/64837/3799/5719/64446/5689/25942/10540/4713/6908/581/7381/11047/27019/9519/54539/6804/5690/1387/1340/5709/64764/148327/9001/1329/1337/84701/4698/84516/4728/3065/5686/5702/5601/1345/5687/56901/170712/5437/4702/1347/292/16…
hsa05320	Autoimmune thyroid disease	52	0.593285	2.3842	3.25839e-08	2.97831e-07	1.44985e-07	4783	tags=50%, list=19%, signal=41%	5551/942/3002/3133/3125/356/355/3106/3115/3113/959/3122/3134/3111/3117/3445/3109/3565/3126/941/3119/1081/3108/7253/940/3112
hsa03050	Proteasome	44	-0.65112	-2.327	3.15542e-08	2.97831e-07	1.44985e-07	6336	tags=70%, list=25%, signal=53%	5720/5721/143471/5694/5718/5700/5714/5704/5706/5717/5682/10213/5715/5719/5689/11047/5690/5709/5686/5702/23198/5687/5701/5695/5693/10197/5708/5692/5707/5710/5691
hsa04621	NOD-like receptor signaling pathway	168	0.412866	2.06053	3.30923e-08	2.97831e-07	1.44985e-07	4240	tags=36%, list=17%, signal=30%	23710/118429/63940/81631/6352/1668/4615/10379/1667/6347/7099/5602/114548/3553/1536/4939/10628/3428/834/820/199713/5330/6041/596/9474/11337/1508/2920/84168/58484/3665/84557/1535/11035/4938/3716/3725/3445/115362/3569/11345/1669/10135/7189/9447/4790/3455/5332/7124/5586/3456/115361/24145/2635/64170/3551/9051/837/10010/3454
hsa04613	Neutrophil extracellular trap formation	101	0.479476	2.19988	4.69076e-08	4.11058e-07	2.00104e-07	3795	tags=45%, list=15%, signal=38%	2357/2358/1378/6403/1511/23569/27180/5880/2359/728/7099/1536/5293/834/653361/2212/820/64581/7097/51311/5330/4689/366/2215/5336/4353/1535/3689/7450/5295/207/6404/291/9734/1182/6850/5604/4790/2811/3690/5332/3684/566/10013/2244
hsa04940	Type I diabetes mellitus	43	0.624564	2.38771	1.40176e-07	1.19689e-06	5.82649e-07	4783	tags=58%, list=19%, signal=47%	5551/942/5799/3553/3002/3133/3125/356/355/3106/3115/3113/3122/3134/3111/3117/3109/3126/941/7124/3593/3119/3108/940/3112
hsa04064	NF-kappa B signaling pathway	95	0.47772	2.17643	1.66856e-07	1.38907e-06	6.76204e-07	3613	tags=40%, list=14%, signal=34%	6387/5743/3554/695/4616/7132/4615/7099/929/3553/6366/6363/10673/9560/388372/8837/596/7535/1459/2920/10912/5336/472/23643/8600/959/4067/7412/5588/3932/1540/10892/6850/7189/4790/7124/1647/6357
hsa03460	Fanconi anemia pathway	44	-0.624472	-2.23176	2.82983e-07	2.24365e-06	1.09221e-06	5453	tags=61%, list=22%, signal=48%	545/2175/9894/2072/4292/80198/5429/55120/6119/7156/7398/5395/83990/2178/79728/5889/2187/84126/2189/8940/146956/55215/80010/672/2177/641/29089
hsa04630	JAK-STAT signaling pathway	159	0.39705	1.97968	2.80057e-07	2.24365e-06	1.09221e-06	3504	tags=29%, list=14%, signal=25%	3977/5156/3587/2273/9021/8835/10379/316/3459/4609/3568/5293/3575/1441/3560/6774/4170/2057/3572/2690/3594/3717/596/6775/3600/595/3598/2056/3953/3716/3445/5295/3569/207/3566/3565/6778/896/1489/894/3455/3559/9180/3593/3574/3456
hsa04672	Intestinal immune network for IgA production	47	0.598212	2.35321	3.6559e-07	2.8312e-06	1.37824e-06	4846	tags=57%, list=19%, signal=46%	6387/942/608/23495/3125/10673/7852/3600/3115/3113/959/3122/3111/3117/3569/3109/3565/3126/3676/941/10803/3119/23308/3108/940/3112/3695
hsa03440	Homologous recombination	33	-0.672804	-2.25466	3.87114e-07	2.92975e-06	1.42621e-06	5071	tags=67%, list=20%, signal=53%	79184/10111/51720/6742/80198/6119/7156/83990/10714/11073/79728/5889/5932/8438/7517/8940/580/146956/5424/672/25788/641
hsa04936	Alcoholic liver disease	136	0.415333	1.99482	4.62479e-07	3.42235e-06	1.66601e-06	4073	tags=37%, list=16%, signal=31%	1571/713/712/2308/125/714/7132/4615/728/7099/929/5602/127/3553/23417/719/217/124/356/79966/355/5609/23411/128/37/595/2920/219/6416/130/23643/126/3445/3569/207/7189/224/4790/6720/7124/3593/3456/32/5606/23765/34/79602/6934/10891/3551
hsa04662	B cell receptor signaling pathway	81	0.494118	2.1703	5.09818e-07	3.69064e-06	1.79661e-06	3141	tags=46%, list=12%, signal=40%	10990/353514/10288/11027/8519/695/975/5880/5293/2353/3635/7409/971/11025/4772/11026/640/5336/5530/2213/973/3725/4067/5295/10451/207/118788/5533/11024/11006/10892/23547/6850/5604/4790/974/3845
hsa04151	PI3K-Akt signaling pathway	336	0.313619	1.68331	6.32947e-07	4.48449e-06	2.18306e-06	3504	tags=28%, list=14%, signal=25%	4908/3680/7010/5156/1436/10319/3908/2791/3082/54331/4804/1902/8074/4846/7099/7057/4609/3815/4803/5649/1292/5293/55844/3575/1441/3560/23533/5294/56034/4170/1969/80310/5934/2057/7039/7097/356/26281/2690/3717/1285/5105/596/1286/57121/1027/1291/595/3164/2149/2322/63923/5728/6194/2998/1021/7424/2056/5516/3913/3716/7450/94235/3445/5295/3569/468/207/5521/8516/118788/3566/3565/896/3676/4915/6850/5604/559…
hsa04620	Toll-like receptor signaling pathway	101	0.448574	2.0581	6.57209e-07	4.55939e-06	2.21952e-06	3609	tags=39%, list=14%, signal=33%	942/6352/4615/7099/929/5602/3553/5293/7098/7096/2353/7097/51311/9560/388372/5609/1326/414062/6416/3665/23643/3725/3445/5295/3569/207/6349/6348/7189/5604/4790/941/10333/3455/54106/7124/3593/3456/5606
hsa03430	Mismatch repair	22	-0.738983	-2.23522	7.75453e-07	5.26992e-06	2.56541e-06	4302	tags=77%, list=17%, signal=64%	6742/4292/27030/5111/6119/5982/5395/5981/4436/2956/10714/3978/5985/5424/5983/9156/5984
hsa00280	Valine, leucine and isoleucine degradation	47	0.586692	2.3079	8.35753e-07	5.56612e-06	2.7096e-06	4507	tags=60%, list=18%, signal=49%	316/64064/217/4329/54511/84693/594/219/3155/3712/10449/549/30/3033/35/1962/18/593/224/64902/5095/34/11112/38/26275/1629/3032/36
hsa00380	Tryptophan metabolism	37	0.629733	2.36595	9.4293e-07	6.15678e-06	2.99714e-06	3880	tags=49%, list=15%, signal=41%	11185/1544/2639/316/51166/217/6999/847/219/8564/64577/4129/1543/3033/1962/224/8942/38
hsa04668	TNF signaling pathway	108	0.433026	2.00938	1.19839e-06	7.67431e-06	3.73587e-06	3609	tags=37%, list=14%, signal=32%	8809/5743/7133/7132/9021/6352/3726/6347/5602/3553/5293/2353/6372/1906/355/5609/6401/8837/1326/3600/2920/6416/197259/7424/11035/3725/7412/5295/3569/468/207/1540/3659/5604/1051/4790/9252/7124/3456/5606
hsa04120	Ubiquitin mediated proteolysis	132	-0.44267	-1.9367	1.5669e-06	9.72049e-06	4.73196e-06	4081	tags=36%, list=16%, signal=31%	23295/26272/7332/1642/51343/389898/378884/23624/10477/55120/10075/51366/4193/23221/7316/7329/7322/8450/10401/9616/27339/7428/23291/29882/51588/9820/64682/23327/8924/23759/9040/1161/51433/22954/51434/63893/9690/8453/65264/6502/55585/672/8697/4591/51529/10055/991/11065
hsa05012	Parkinson disease	225	-0.385343	-1.80053	1.5763e-06	9.72049e-06	4.73196e-06	5794	tags=41%, list=23%, signal=32%	10131/5694/5718/4137/7345/7419/4709/6391/347688/4722/4128/55967/5335/1649/5700/1350/836/818/808/4723/7384/5568/5714/2861/7278/7846/7280/27429/5704/7332/5706/5717/5682/10213/4711/4696/5715/3309/64837/3799/5719/5689/7922/4713/581/7381/11047/54539/7316/5690/1340/5709/7295/1329/1337/84701/4698/4728/5686/5702/5601/55669/1345/5687/56901/170712/2774/4702/1347/292/1616/1351/4694/203068/5701/9377/84790/29…
hsa05310	Asthma	30	0.660515	2.36335	1.87326e-06	1.13418e-05	5.5212e-06	4783	tags=67%, list=19%, signal=54%	2207/2205/6037/3125/2206/3115/3113/959/3122/3111/3117/3109/3565/5553/3126/7124/3119/3108/3596/3112
hsa05164	Influenza A	161	0.377692	1.88438	2.43276e-06	1.44662e-05	7.04219e-06	3524	tags=34%, list=14%, signal=29%	90865/7132/9021/6352/4615/10379/6347/7099/3459/56000/114548/3553/4939/5293/834/7098/3125/356/3717/355/6041/64135/8795/7177/10241/91543/3115/3665/3113/4600/1021/4599/4938/3122/3111/3117/3716/3445/5295/3569/207/3109/291/896/3126/5340/5604/7113/4790/3455/7124/3593/3456/3119
hsa05133	Pertussis	74	0.474791	2.04194	3.71146e-06	2.16827e-05	1.05552e-05	3747	tags=39%, list=15%, signal=33%	713/715/712/714/710/716/4615/7099/929/5602/114548/3553/834/2353/6372/3394/23643/722/2773/3689/3725/3569/3659/7189/4790/7124/3593/3684/2771
hsa04350	TGF-beta signaling pathway	94	0.442114	2.00787	3.95505e-06	2.27074e-05	1.1054e-05	1649	tags=26%, list=7%, signal=24%	4091/654/1634/4092/653/3399/3397/269/7048/57817/659/7057/2615/4609/7043/92/2331/3398/2014/4093/8646/285704/64388/3400
hsa05416	Viral myocarditis	59	0.52681	2.14312	4.20861e-06	2.37537e-05	1.15633e-05	4783	tags=51%, list=19%, signal=41%	3908/1604/2534/5551/942/6442/5880/3133/3125/595/6444/6443/3106/3115/3113/959/3122/3134/3111/3689/3117/3109/3126/941/3119/3108/857/284217/940/3112
hsa05152	Tuberculosis	177	0.363382	1.83446	4.3499e-06	2.4142e-05	1.17524e-05	3524	tags=32%, list=14%, signal=28%	3587/10332/1378/30835/7132/4615/1520/7099/929/3459/5602/3553/2207/7043/7096/2212/820/64581/7097/3125/3717/22925/596/972/2215/11151/5530/3115/816/3113/2213/3122/3111/3689/3117/3716/3445/3569/9902/207/3109/5533/3126/10892/23365/6850/7189/1051/4790/10333/5289/54106/7124/3593/3684/3456/3119
hsa05418	Fluid shear stress and atherosclerosis	136	0.391049	1.87818	5.12031e-06	2.79519e-05	1.3607e-05	3388	tags=32%, list=13%, signal=28%	3162/2949/3554/7056/7132/2947/4780/5880/10365/659/4846/1003/6347/5602/3553/5293/92/653361/2353/2950/1906/5609/6401/596/2946/4313/59341/6416/445/5327/1535/3725/7412/5295/5175/207/9446/4208/4790/5598/3690/7124/2944
hsa04010	MAPK signaling pathway	284	0.312658	1.6562	8.05953e-06	4.32875e-05	2.10725e-05	3609	tags=29%, list=14%, signal=25%	4908/7010/5156/1436/3554/1398/4616/3082/7132/7048/4804/5880/4615/8074/1847/929/4609/5602/3815/3553/4803/10125/2872/7043/10235/2353/56034/1969/80310/7039/356/26281/3306/9064/355/5609/80824/1326/3164/1848/6196/4772/10912/2322/5530/6416/6237/93589/1844/7424/11184/3725/408/468/4149/207/5533/27330/4214/4208/4915/7189/5604/55970/3643/4790/3845/2255/5598/2323/3479/3556/9252/7124/2064/284/781/5567/1843/1…
hsa05323	Rheumatoid arthritis	90	0.437812	1.96388	9.40414e-06	4.97076e-05	2.41978e-05	3524	tags=38%, list=14%, signal=33%	6387/7010/942/6352/6347/7099/3553/7043/2353/6372/7097/3125/10673/3600/2920/414062/3115/3113/8600/3122/3111/3689/3117/3725/3569/9550/3109/6349/6348/3126/941/7124/284/3119
hsa05162	Measles	135	0.380033	1.81893	1.14974e-05	5.98224e-05	2.91217e-05	3504	tags=36%, list=14%, signal=31%	10332/30835/4615/10379/7099/5602/3553/4939/5293/3560/2353/6774/7097/356/3306/355/25898/596/1027/64135/1459/595/915/6504/3665/916/9367/4600/1021/4599/4938/2213/9451/3716/3725/3445/5295/3569/207/896/7189/4790/894/3455/3559/54106/3593/3456
hsa04080	Neuroactive ligand-receptor interaction	338	0.292427	1.57278	1.21264e-05	6.21245e-05	3.02424e-05	4361	tags=23%, list=17%, signal=19%	7433/147/6915/53829/5732/2357/133/140/2358/10888/1910/185/5734/1511/2568/3001/1902/148/4889/3357/2359/728/10800/387129/719/2797/5368/5739/5023/116/55584/59350/2690/2908/27334/1906/5729/10424/2149/10316/2642/135/796/5443/5031/3953/5020/3363/117579/1394/153/154/3640/2562/5340/5173/2897/6344/885/151/5731/8484/5724/1081/706/10911/170589/3352/1139/4543/7200/6863/339403/4142/83551/7253/2895
hsa04933	AGE-RAGE signaling pathway in diabetic complications	97	0.425756	1.96164	1.36547e-05	6.88944e-05	3.3538e-05	2371	tags=34%, list=9%, signal=31%	2152/185/2308/7056/7048/4846/6347/5602/3553/1536/5293/7043/6774/5330/1906/3717/1285/6401/596/1286/1027/4313/595/5333/4772/5336/7424/3725/7412/5295/3569/207/1958
hsa04015	Rap1 signaling pathway	201	0.33507	1.7103	1.44307e-05	7.17229e-05	3.49149e-05	3451	tags=25%, list=14%, signal=22%	7010/5156/2357/1436/3397/1398/8631/3082/2775/4804/1902/5880/8074/7057/3815/4803/5293/3937/10235/56034/1969/80310/83593/26281/5330/57121/7409/107/2149/135/6237/113/7424/2773/3689/9855/5295/10451/207/109/9732/5604/10411/3643/3845/2255/3479/3690/5332/284/3684
hsa04145	Phagosome	147	0.366234	1.79335	1.82951e-05	8.95919e-05	4.36136e-05	3524	tags=34%, list=14%, signal=29%	8685/78989/10332/715/30835/6441/1520/7099/7057/929/4481/1536/83547/653361/2212/64581/3133/84617/79659/7097/3125/4689/948/4153/22925/2215/11151/3106/3115/4353/3113/1535/2213/3122/3134/3111/3689/3117/23673/9902/9550/3109/3126/8417/9341/10333/5289/3690/3684/3119
hsa05146	Amoebiasis	98	0.414326	1.89902	2.17447e-05	0.000103443	5.03561e-05	4892	tags=41%, list=19%, signal=33%	9630/912/10319/3908/3554/1511/7099/929/3553/735/5293/7043/7097/5330/1285/1286/107/2920/384/3913/3689/5295/3569/2769/4790/5332/7124/3593/5567/3684/911/731/3912/5272/87/284217/383/5868/1437/7414
hsa05163	Human cytomegalovirus infection	218	0.323787	1.65495	2.15456e-05	0.000103443	5.03561e-05	3606	tags=30%, list=14%, signal=26%	6387/1230/5156/5732/3587/5743/5734/3554/2791/1398/2775/54331/7132/6352/5880/6347/4609/3553/5293/567/6774/3133/356/5330/9560/388372/355/7852/107/595/4772/414062/3106/5530/1021/113/3134/2773/3716/10672/94235/3445/5295/3569/468/207/5533/109/6349/6348/5925/11214/23365/5604/55970/4790/2185/3845/3690/5332/7124/5567/3456/5731/59345
hsa05143	African trypanosomiasis	32	0.599782	2.1855	2.39257e-05	0.000112215	5.46265e-05	3938	tags=50%, list=16%, signal=42%	3040/3043/4615/3553/356/5330/355/6401/7412/3569/5332/54106/335/7124/3593/3250
hsa05135	Yersinia infection	129	0.368922	1.76556	2.5132e-05	0.000116235	5.65836e-05	3609	tags=34%, list=14%, signal=29%	920/1398/925/5880/4615/6347/7099/5602/114548/3553/7456/5293/834/3937/2353/2212/7454/5609/7535/7409/6196/4772/6416/58484/3725/5295/3569/3932/10451/207/1793/27330/23365/3676/7189/5604/391/4790/2185/8395/7124/5586/3456/5606
hsa05167	Kaposi sarcoma-associated herpesvirus infection	187	0.350235	1.78274	2.63006e-05	0.000119974	5.84037e-05	4567	tags=36%, list=18%, signal=30%	1230/5743/2791/54331/7132/7538/81631/942/10379/3459/4609/5602/1827/3055/5293/7098/2353/23533/6774/5294/3091/3133/9976/3572/3717/355/5609/595/2920/4772/5336/3106/5530/6416/3665/84557/1021/3134/3716/3725/4067/94235/3445/5295/3569/207/5533/5925/57580/6850/5604/55970/4790/3845/5289/3455/3456/59345/1385/6934/3551/1232/3454/5532/2788/131450/2247/801
hsa04670	Leukocyte transendothelial migration	104	0.412476	1.89877	2.68358e-05	0.000120761	5.87868e-05	3747	tags=36%, list=15%, signal=30%	6387/5010/5880/9071/1003/3702/1536/58494/5293/653361/9075/7294/83593/4689/7852/4313/7409/5336/9073/7122/1535/2773/3689/7412/5295/5175/10451/83700/29119/10398/3676/10411/2185/3684/23562/90952/2771
hsa00220	Arginine biosynthesis	20	0.705157	2.27168	3.22424e-05	0.000143156	6.96889e-05	4761	tags=75%, list=19%, signal=61%	4846/27165/445/384/2746/2875/2752/84706/95/2805/1373/435/383/162417/5009
hsa05235	PD-L1 expression and PD-1 checkpoint pathway in cancer	87	0.427914	1.91077	3.34739e-05	0.000146668	7.13986e-05	4322	tags=45%, list=17%, signal=37%	920/4615/7099/919/55509/3459/10125/5293/2353/6774/3091/7097/3717/7535/1459/4772/915/5728/5530/916/3716/3725/10538/5295/5588/3932/207/116071/5533/7189/5604/4790/3845/54106/5606/917/3551/238/5532
hsa00350	Tyrosine metabolism	35	0.577961	2.13045	3.79211e-05	0.000163997	7.9834e-05	2040	tags=40%, list=8%, signal=37%	1621/125/316/127/3242/124/7054/128/1312/2954/6898/130/4129/126
hsa04020	Calcium signaling pathway	231	0.314589	1.62277	3.96032e-05	0.000169075	8.23063e-05	4918	tags=30%, list=20%, signal=24%	147/9630/5156/6915/1910/185/3082/148/3357/8074/4846/10800/5153/4803/4638/56034/3270/5023/80310/5136/26281/5330/7852/952/107/5333/2149/5336/5530/135/816/113/7424/3707/489/3363/5533/109/291/153/154/2769/4915/57192/2185/2255/5332/57172/2064/5567/5731/5724/57118/6786/1139/4485/5257/2250/5532/80228/255231/2252/2247/801/2260/774/2249/552/6263
hsa05202	Transcriptional misregulation in cancer	166	0.349499	1.74715	4.33946e-05	0.000182917	8.90443e-05	5196	tags=42%, list=21%, signal=33%	3486/1436/2308/4094/4616/7048/4804/942/1668/2530/1667/4005/929/4609/3002/3560/7102/3398/9611/5966/8842/4066/1027/7704/1848/6688/10912/2322/472/4353/5327/4299/64919/3569/4149/860/5087/862/1669/604/2120/4208/1051/7113/4790/894/171558/221037/3479/6760/3684/1647/1025/2313/3248/7490/5081/51426/2209/26039/1437/3695/3480/8900/4211/8861/466/1643/2892
hsa00190	Oxidative phosphorylation	98	-0.442119	-1.82382	4.5095e-05	0.000187708	9.13767e-05	5487	tags=55%, list=22%, signal=43%	527/4720/7386/4704/4712/4729/479/9114/51382/4731/4709/6391/4722/55967/10312/495/1350/50617/4723/7384/4711/4696/529/90423/535/4713/523/7381/54539/23545/1353/1340/1329/1337/84701/4698/4728/533/1345/10063/56901/170712/245972/528/4702/1347/1351/9296/4694/537/9377/7388/1537/4708
hsa03008	Ribosome biogenesis in eukaryotes	62	-0.496409	-1.90839	6.12352e-05	0.000251745	0.00012255	6621	tags=61%, list=26%, signal=45%	83732/57455/10775/84128/84135/23195/55272/26354/29889/2091/10436/10799/23160/51096/6949/10607/22803/10813/10885/92856/9790/10940/55813/23560/55226/1457/55127/10248/1736/7514/54552/3692/65083/1460/55341/55131/51367/4931
hsa04612	Antigen processing and presentation	75	0.452069	1.95813	6.73719e-05	0.000273596	0.000133187	4122	tags=47%, list=16%, signal=39%	920/3824/925/5641/1520/567/3133/3822/3125/3306/972/1508/3823/3821/3106/3115/3113/3804/3122/3134/3111/3117/3802/3109/3812/3808/3805/3126/3811/7124/3119/1385/115653/57292/3108
hsa03015	mRNA surveillance pathway	86	-0.455462	-1.84566	8.28165e-05	0.000332264	0.000161747	3719	tags=36%, list=15%, signal=31%	56903/22985/5523/5515/22916/81608/9775/55339/5522/5501/8731/10921/29894/4116/2733/124540/65109/28227/11052/26019/8732/22794/4440/4686/51692/9887/5525/23381/5528/1478/10898
hsa04216	Ferroptosis	39	0.536677	2.03058	9.14427e-05	0.000362505	0.000176468	2820	tags=44%, list=11%, signal=39%	5621/3162/81631/30061/51703/1536/6303/112483/2180/9474/55240/8031/84557/2495/1356/64116/6520
hsa03320	PPAR signaling pathway	70	0.443334	1.87521	0.00011488	0.00045006	0.00021909	5023	tags=43%, list=20%, signal=34%	5360/10580/51703/2167/79966/948/2180/5105/364/2170/10998/376497/1582/30/1593/33/1376/51129/1962/2712/2710/335/34/5106/3611/116519/23305/6342/10999/10062
hsa04014	Ras signaling pathway	220	0.307373	1.57383	0.000139202	0.000539004	0.000262389	5161	tags=33%, list=21%, signal=27%	4908/7010/5156/23179/5322/1436/2791/2113/3082/54331/4804/5880/8074/5602/3815/4803/10125/5293/10235/56034/1969/80310/83593/7039/356/26281/5966/7535/2322/5336/2114/6237/7424/8036/25759/94235/5295/3363/207/2549/4915/5604/55970/3643/4790/3845/2255/2323/3479/5320/284/5567/59345/22821/3551/81579/2250/2788/7074/2252/2247/5922/801/5868/2260/9610/2249/10000/3480/9846/283455/22808/5908
hsa04714	Thermogenesis	173	-0.366169	-1.66373	0.000145096	0.000555366	0.000270354	5826	tags=39%, list=23%, signal=30%	2181/115/4879/9658/4709/6391/6654/4722/6300/55967/7350/4878/1350/90639/4723/7384/5568/6655/53632/4711/4696/5600/6199/4713/7381/8289/2641/60/54539/1353/1340/64764/2885/152831/148327/84335/1329/1337/84701/4698/6599/7248/4728/656/5565/1345/10063/112/6601/56901/170712/4702/1347/1351/86/4694/9377/6009/3265/6598/4893/6597/7388/1386/1537/5564/4708/6602
hsa05010	Alzheimer disease	336	-0.312019	-1.51116	0.000329093	0.00124532	0.000606224	4845	tags=30%, list=19%, signal=25%	572/1649/5700/1350/836/637/808/5534/4723/7384/22943/5714/7278/2906/7846/7280/5704/5706/5717/27035/5682/10213/5535/5605/7474/4711/23236/4696/5715/8408/64837/6868/7855/3799/5719/7473/5894/1856/5689/7922/4713/8312/7381/11047/54539/5690/1340/5709/10297/8851/1329/1337/84701/4698/4728/5686/5702/5601/1457/1345/5687/5291/56901/170712/4702/1347/10313/292/1857/2932/1351/50507/4694/203068/5701/9377/84790/29…
hsa04114	Oocyte meiosis	114	-0.397413	-1.69789	0.000345762	0.00129369	0.000629774	2515	tags=27%, list=10%, signal=25%	5501/89869/27127/10459/23291/29882/112/1017/10971/64682/7534/9088/51433/51434/5525/9700/898/5528/995/26271/8697/51529/4085/9134/286151/6790/699/891/9232/9133/991
hsa05017	Spinocerebellar ataxia	128	-0.388197	-1.68896	0.000378008	0.00139863	0.000680857	6078	tags=41%, list=24%, signal=31%	55626/23152/143471/23369/5694/5718/2911/7222/7419/5700/5714/2906/5578/5704/5706/5717/5682/10213/23236/5715/8408/5719/5689/6908/11047/9519/6311/5690/5709/5686/5702/5601/10939/5687/5291/4976/6511/11273/292/5701/5695/7186/5693/7416/5296/5708/5692/5707/5710/5691/4800/488
hsa05022	Pathways of neurodegeneration - multiple diseases	416	-0.295363	-1.458	0.000395584	0.00144758	0.000704684	5716	tags=34%, list=23%, signal=27%	5694/5718/4137/2911/7222/1499/7345/7419/7471/4709/6391/347688/4722/6300/55967/23401/55255/5335/572/1649/5700/1350/836/818/637/1770/808/5608/5534/4723/7384/22943/5714/2861/7278/2906/5578/8878/7846/7280/3092/27429/5704/7332/5706/5717/27035/5682/10213/5535/4741/5605/7474/4711/57679/23236/578/4696/5715/3309/5600/8408/64837/7855/3799/5719/7473/5894/64446/1856/5689/10540/4713/581/8312/7381/11047/27019/…
hsa05020	Prion disease	233	-0.33339	-1.56217	0.00040008	0.00144812	0.000704947	4845	tags=36%, list=19%, signal=29%	572/1649/5700/1350/836/5534/4723/7384/5568/5714/7278/2906/7846/7280/5704/5706/5717/5682/10213/5535/4711/3915/4696/5715/3309/5600/64837/3799/5719/5689/4713/581/3312/3304/7381/11047/54539/5690/1340/5709/64764/148327/1329/1337/84701/4698/4728/5686/5702/5601/1457/1345/5687/5291/56901/170712/4702/1347/292/2932/1351/4694/203068/5701/9377/84790/5695/1460/7388/5693/113457/1386/1537/7416/10376/4708/5296/5…
hsa04217	Necroptosis	128	0.35158	1.6781	0.000475486	0.00170255	0.000828805	3504	tags=30%, list=14%, signal=26%	90865/7132/10379/7099/3459/5602/114548/3553/1536/81030/834/7098/6774/124044/356/3717/355/8837/596/6775/8795/816/197259/11035/3716/3445/2495/9525/6778/1540/2746/291/2752/6609/51510/3455/7124/27183/3456
hsa04976	Bile secretion	85	0.390107	1.73904	0.000482806	0.00171037	0.000832611	4600	tags=36%, list=18%, signal=30%	28234/54658/54657/1576/1080/9971/6523/366/6580/107/10998/477/7365/10599/113/54659/8671/6554/109/3949/358/6548/3781/482/6344/5567/5244/1244/7366/6822/8647
hsa04978	Mineral absorption	58	0.449441	1.83084	0.000502585	0.00176169	0.000857597	2679	tags=29%, list=11%, signal=26%	4502/3162/4489/4493/4501/4499/79901/4494/30061/4495/9843/6523/4496/477/55503/2495/482
hsa00340	Histidine metabolism	19	0.660406	2.10508	0.000552909	0.0019084	0.000929016	4460	tags=63%, list=18%, signal=52%	443/217/3067/84735/3176/219/4129/144193/224/10841/131669/3034
hsa05169	Epstein-Barr virus infection	196	0.301323	1.54465	0.000555901	0.0019084	0.000929016	3609	tags=31%, list=14%, signal=26%	695/4616/4615/10379/864/919/4609/5602/4939/5293/567/6774/960/3133/7097/3125/355/5609/596/1027/7431/595/915/10912/5336/3106/3115/6416/3665/916/3113/1021/4938/3122/3134/3111/3117/3716/3725/4067/3445/5295/3569/207/3109/8819/896/3126/5925/6850/7189/22938/4790/894/3455/7124/3456/3119/1647/5606
hsa00640	Propanoate metabolism	31	0.548297	1.96342	0.000596781	0.00201757	0.000982157	4093	tags=52%, list=16%, signal=43%	23417/8801/3945/4329/84693/594/8803/55862/35/1962/18/593/32/5095/26275/1629
hsa03420	Nucleotide excision repair	43	-0.516479	-1.84141	0.000599817	0.00201757	0.000982157	7151	tags=65%, list=28%, signal=47%	2966/1022/56655/2074/5886/2967/6118/2068/5426/2072/1642/1069/5111/8450/6119/5982/5981/10714/2968/1161/3978/2071/5985/5424/5983/54107/5427/5984
hsa04625	C-type lectin receptor signaling pathway	104	0.367632	1.69234	0.000658774	0.00219372	0.00106791	5340	tags=39%, list=21%, signal=31%	51266/5743/10332/30835/10379/5602/114548/3553/2207/5293/834/64581/4772/5336/5530/6237/3725/5295/3569/1959/207/5533/1540/3659/10892/23365/6850/4790/3845/7124/3593/64170/3551/5532/1960/801/10000/6773/22808/868/1263
hsa05134	Legionellosis	55	0.44391	1.78761	0.0007331	0.00241705	0.00117663	3635	tags=36%, list=14%, signal=31%	1378/4615/7099/929/3553/834/56681/1195/7097/3306/2920/58484/3689/3569/4790/57396/7124/3593/3684/664
hsa00100	Steroid biosynthesis	18	-0.658561	-1.92025	0.000752682	0.00245728	0.00119621	5555	tags=72%, list=22%, signal=56%	8435/2222/7108/1595/10682/1056/4047/1594/50814/1717/120227/3930/6713
hsa04924	Renin secretion	67	0.410572	1.71927	0.000773474	0.00250065	0.00121732	6156	tags=48%, list=24%, signal=36%	5732/185/5734/5153/116/5136/5330/1906/3778/1508/5530/2773/5533/358/153/154/5593/5332/5567/5140/2771/1385/5532/801/9635/1908/1909/775/778/2770/155/111
hsa04510	Focal adhesion	191	0.301087	1.53909	0.000852178	0.00272861	0.00132829	3412	tags=26%, list=14%, signal=22%	3680/5156/10319/3908/2534/1398/3082/5880/7057/5602/5649/1292/5293/4638/56034/4660/80310/1285/596/1286/1291/64098/7409/595/63923/5728/55742/7424/3913/7450/25759/3725/2012/5295/10451/207/8516/54776/1793/4659/896/10398/3676/5604/894/3479/8395/3690/2064
hsa03018	RNA degradation	70	-0.447362	-1.75999	0.000872821	0.00276809	0.00134751	6932	tags=44%, list=28%, signal=32%	167227/84186/5042/23644/23016/51691/80349/27257/3313/51690/23019/23658/1656/22803/10438/6499/115752/4848/56915/51010/57472/54512/3329/23404/2023/4849/57819/25904/80153/4850/25804
hsa05340	Primary immunodeficiency	36	0.503106	1.86611	0.00093913	0.00295029	0.00143621	2495	tags=36%, list=10%, signal=33%	920/695/3543/925/3575/23495/7535/915/916/959/973/3932/5788
hsa03020	RNA polymerase	26	-0.594217	-1.89133	0.000995867	0.00309929	0.00150874	6307	tags=65%, list=25%, signal=49%	9533/5435/5436/84172/5438/10622/25885/5441/11128/51728/10621/171568/10623/55703/5437/5439/5433
hsa00620	Pyruvate metabolism	46	0.464688	1.81226	0.00100763	0.00310686	0.00151243	3880	tags=41%, list=15%, signal=35%	125/127/217/3945/9380/124/5105/128/219/130/197257/98/126/134526/224/32/5091/5106/38
hsa05032	Morphine addiction	88	0.373637	1.67949	0.0011335	0.0034629	0.00168575	4873	tags=34%, list=19%, signal=28%	5138/8622/2869/27115/2791/2568/2775/54331/5142/5153/5144/5136/107/113/2773/94235/408/5151/109/2562/55970/5567/59345/5140/2771/2788/2868/774/409/2550
hsa05110	Vibrio cholerae infection	49	-0.46603	-1.71493	0.00119488	0.00361724	0.00176088	6838	tags=57%, list=27%, signal=42%	10952/9114/51382/115/11015/7082/10312/5335/11014/50617/5568/5578/9601/529/90423/535/523/60/23545/533/375/245972/528/9296/55176/537/23480/29927
hsa00590	Arachidonic acid metabolism	52	0.439541	1.76636	0.00127266	0.00381799	0.00185861	4196	tags=40%, list=17%, signal=34%	2687/5322/6916/1571/5743/5740/113612/4056/1559/8529/1555/5730/240/1558/2053/5742/5320/151056/1573/3248/81579
hsa04660	T cell receptor signaling pathway	100	0.353225	1.62077	0.00130024	0.00386588	0.00188192	4810	tags=41%, list=19%, signal=33%	920/2534/925/919/3702/5602/10125/5293/3937/2353/5609/7535/1326/7409/4772/915/5530/916/959/3725/5295/5588/3932/10451/207/5533/3565/5788/10892/5604/4790/3845/7124/917/9402/3551/84433/5532/940/1437/10000
hsa04914	Progesterone-mediated oocyte maturation	86	-0.415314	-1.68297	0.0013786	0.00406259	0.00197768	2088	tags=28%, list=8%, signal=26%	10459/29882/5601/112/1017/5291/64682/9088/51433/51434/3326/993/673/5296/995/8697/51529/4085/994/6790/699/891/890/9133
hsa00900	Terpenoid backbone biosynthesis	22	-0.588918	-1.78131	0.00155351	0.00445964	0.00217097	4078	tags=55%, list=16%, signal=46%	3157/10654/9453/79947/4597/3156/91734/2342/9986/10269/2224/23590
hsa00240	Pyrimidine metabolism	50	-0.466552	-1.71168	0.00155033	0.00445964	0.00217097	4449	tags=40%, list=18%, signal=33%	4833/318/7372/10201/83549/56474/654364/56953/54963/4831/955/1854/790/7298/7083/4830/6241/6240/124583/7371
hsa05205	Proteoglycans in cancer	196	0.290135	1.4873	0.00154204	0.00445964	0.00217097	3445	tags=27%, list=14%, signal=23%	1634/288/3059/3082/8826/2099/7099/7057/10855/4609/5293/7078/6774/3091/960/4660/8321/4060/7097/356/355/4313/7409/595/3316/5336/6194/7472/6237/816/7481/5295/10451/207/287/54776/4659/967/6548/8325/2549/23365/5604/3845/54361/3479/3690/5962/7124/2064/3593/5567
hsa00140	Steroid hormone biosynthesis	58	0.422215	1.71993	0.00190256	0.00536909	0.00261368	4246	tags=34%, list=17%, signal=29%	1571/1544/54658/54657/1576/3290/1312/7365/54659/1543/6716/6715/3294/51170/6783/1551/7923/51144/6718/7366
hsa04926	Relaxin signaling pathway	125	0.324083	1.53641	0.00188849	0.00536909	0.00261368	3747	tags=32%, list=15%, signal=27%	1910/2791/2775/54331/7048/4846/5602/5293/2353/59350/5330/1906/1285/5609/1286/4313/107/6416/113/7424/2773/25759/3725/94235/408/5295/468/117579/207/109/3640/2769/5604/55970/4790/3845/5332/5567/59345/2771
hsa04923	Regulation of lipolysis in adipocytes	54	0.422132	1.7037	0.00209161	0.005853	0.00284925	6524	tags=56%, list=26%, signal=41%	5743/5293/2167/107/364/113/2773/5295/207/109/153/154/5593/5742/3643/5567/5140/1081/2771/57104/7253/10000/3991/63924/196883/2770/155/111/5290/134
hsa00410	beta-Alanine metabolism	30	0.510443	1.82639	0.00215649	0.00598425	0.00291315	3953	tags=43%, list=16%, signal=37%	51380/23417/217/4329/84735/219/1806/35/1962/18/224/8639/26275
hsa04310	Wnt signaling pathway	163	0.295511	1.47132	0.00236308	0.00650336	0.00316585	3516	tags=27%, list=14%, signal=23%	84870/6422/23002/23500/7091/5880/144165/4609/5602/340419/166336/2239/8321/5330/1452/8061/6425/1459/595/4772/4920/8313/5530/7472/816/85409/59352/5176/3725/7481/5533/147495/4316/284654/9978/8325/896/894/54361/2487/5332/5663/5567/79816
hsa04066	HIF-1 signaling pathway	103	0.344558	1.58163	0.00241976	0.00660475	0.00321521	3413	tags=30%, list=14%, signal=26%	7010/3101/3162/4846/7099/3459/1536/2872/5293/3945/6774/3091/1906/596/1027/5336/6194/816/2056/5295/3569/207/9978/5213/5604/3643/4790/2026/3479/2064/284
hsa00563	Glycosylphosphatidylinositol (GPI)-anchor biosynthesis	26	-0.567539	-1.80642	0.00261272	0.00707347	0.00344339	5835	tags=62%, list=23%, signal=47%	54965/284098/94005/80055/5281/54872/93183/23556/65258/51604/84720/5279/80235/8733/128869/8818
hsa05166	Human T-cell leukemia virus 1 infection	213	0.276311	1.41212	0.00315925	0.00848413	0.00413009	3524	tags=32%, list=14%, signal=28%	920/3554/2113/7132/7048/7538/10744/4609/5602/5293/7043/3560/567/2353/3133/3125/8061/107/3600/595/6688/4772/915/5728/387332/3106/5530/472/3115/6416/2114/916/3113/113/3122/3134/3111/3689/3117/3716/10393/3725/5295/3569/3932/468/1959/207/1958/3109/5533/4316/109/8829/8379/291/896/3126/4214/5925/5604/4790/894/3845/3559/7124/5567/3119
hsa05207	Chemical carcinogenesis - receptor activation	187	0.292849	1.49064	0.00344732	0.00918366	0.00447063	4855	tags=34%, list=19%, signal=27%	2949/9314/1544/2947/2099/4609/54658/54657/1576/5293/2353/6774/28514/55584/26281/1555/3717/596/2946/107/595/6196/7365/8600/113/54659/2773/9970/3725/408/5295/1543/468/207/9446/2053/109/604/27330/153/896/154/5925/5604/4790/3845/2255/2944/5567/2771/1385/1139/367/2250/7366/4258/2252/2247/774/2249/10000/409/6777
hsa01232	Nucleotide metabolism	67	-0.414615	-1.61859	0.00369226	0.00975811	0.00475027	3531	tags=31%, list=14%, signal=27%	1716/10201/954/83549/56474/654364/3704/56953/272/158/54963/4831/955/1854/7298/7083/4830/6241/6240/124583/7371
hsa00260	Glycine, serine and threonine metabolism	39	0.443438	1.6778	0.00429474	0.011261	0.00548188	5674	tags=54%, list=23%, signal=42%	212/211/9380/1491/29958/4129/6470/27232/635/51268/8639/441531/875/64902/2653/10993/5223/1757/1610/23464/2628
hsa00970	Aminoacyl-tRNA biosynthesis	24	-0.54776	-1.69914	0.00448256	0.0116404	0.00566657	4797	tags=75%, list=19%, signal=61%	51067/57038/55278/57505/54938/92935/25973/10056/10667/283459/55699/23395/2193/124454/57176/80222/23438/55157
hsa04270	Vascular smooth muscle contraction	126	0.311798	1.4855	0.00450934	0.0116404	0.00566657	3445	tags=25%, list=14%, signal=22%	147/5322/133/185/5583/10268/148/27345/4638/4660/5739/5330/1906/3778/4628/107/94274/135/796/113/10672/800/5588/54776/109/4659/10398/23365/5604/5320/5332/5567
hsa04974	Protein digestion and absorption	95	0.342467	1.56023	0.00497631	0.012747	0.00620528	4706	tags=33%, list=19%, signal=27%	5547/5222/54407/643834/23428/1292/9056/91522/1359/7373/1285/4225/1286/4311/1291/477/643847/482/6520/1360/1308/59272/1361/6519/1296/1310/1305/2006/285641/3769/84570
hsa00860	Porphyrin metabolism	39	0.439146	1.66156	0.00525634	0.0133615	0.00650442	2537	tags=28%, list=10%, signal=25%	3162/2395/212/54658/54657/211/9843/7365/54659/645/1356
hsa04664	Fc epsilon RI signaling pathway	66	0.377922	1.58172	0.00573418	0.0144658	0.00704198	3609	tags=39%, list=14%, signal=34%	2534/695/5880/5602/2207/5293/3937/2205/5609/3635/7409/5336/2206/240/6416/241/4067/5295/10451/207/3565/6850/5604/3845/7124/5606
hsa05160	Hepatitis C	152	0.286381	1.4124	0.00587863	0.0147187	0.00716509	3504	tags=29%, list=14%, signal=25%	5010/975/7132/9021/10379/9071/4609/4939/5293/55844/9075/7098/6774/356/355/6041/8837/595/91543/9073/3665/4600/7122/1021/4599/4938/5516/3434/9451/3716/3445/5295/207/5521/3949/5925/7189/5604/4790/3845/3455/7124/23562/3456
hsa04022	cGMP-PKG signaling pathway	158	0.300235	1.49561	0.00652176	0.0162071	0.00788964	3034	tags=23%, list=12%, signal=21%	5138/147/140/1910/185/3764/148/27345/4846/4638/23533/5294/5330/3778/5997/107/4772/5530/477/113/2773/10672/489/468/207/5533/109/4659/482/291/153/154/4208/10398/5593/5604/3643
hsa00010	Glycolysis / Gluconeogenesis	64	0.374691	1.55777	0.00720715	0.0177214	0.00862681	4654	tags=36%, list=18%, signal=29%	3101/125/127/217/3945/124/5105/128/219/130/9562/126/5213/224/2026/441531/2203/5106/5214/5223/3098/55276/5236
hsa04072	Phospholipase D signaling pathway	130	0.306792	1.46958	0.00723756	0.0177214	0.00862681	3328	tags=27%, list=13%, signal=23%	5156/185/2534/1902/3815/2207/5293/23533/2205/5294/56034/80310/5330/57121/107/2149/5336/2206/6237/113/25759/10672/5295/207/1606/109/2549/6850/5604/10411/3643/2185/3845/8395/5332
hsa04727	GABAergic synapse	88	0.334009	1.50136	0.00775286	0.0188446	0.00917358	3747	tags=30%, list=15%, signal=25%	23710/2791/54407/2568/2775/54331/10243/6539/11337/107/27165/5334/113/2773/94235/11345/109/18/92745/2562/2752/55970/6538/5567/59345/2771
hsa04979	Cholesterol metabolism	49	0.397055	1.57547	0.00787876	0.0190118	0.00925499	3704	tags=39%, list=15%, signal=33%	1071/5360/3931/4035/114879/27141/948/3988/1593/3990/3949/51129/4018/337/29116/9218/335/27329/706
hsa04371	Apelin signaling pathway	127	0.297826	1.42013	0.00812178	0.0194572	0.00947183	3747	tags=28%, list=15%, signal=24%	185/4634/2791/54331/81631/10365/4846/4638/23533/5294/5330/107/595/6194/6237/84557/5327/113/2773/10672/94235/207/1958/109/6548/4208/5604/55970/3845/5289/5332/5567/59345/5140/2771
hsa00053	Ascorbate and aldarate metabolism	29	0.463135	1.64029	0.00822469	0.019563	0.00952333	2980	tags=28%, list=12%, signal=24%	54658/54657/217/219/9104/7365/54659/224
hsa04920	Adipocytokine signaling pathway	67	0.36267	1.51868	0.0083195	0.0196482	0.00956479	4073	tags=33%, list=16%, signal=28%	7133/7132/9021/51703/5602/6774/948/3717/2180/5105/5443/3953/5588/207/4790/7124/32/5106/6517/79602/10891/3551
hsa04977	Vitamin digestion and absorption	21	0.519244	1.71167	0.00893793	0.0209601	0.0102034	3500	tags=43%, list=14%, signal=37%	9227/6948/2346/55788/80704/337/686/335/151056
hsa00330	Arginine and proline metabolism	43	0.405628	1.55072	0.00923355	0.0215019	0.0104672	1879	tags=28%, list=7%, signal=26%	51056/4846/1160/217/4942/6303/112483/5033/84735/219/4129/384
hsa04512	ECM-receptor interaction	85	0.330343	1.47261	0.0102939	0.0238047	0.0115882	5072	tags=33%, list=20%, signal=26%	3680/10319/3908/7057/5649/1292/960/948/1285/1286/1291/961/63923/255743/3913/7450/8516/3676/2811/3690/1758/3912/341640/7058/284217/3695/2814/7059
hsa04921	Oxytocin signaling pathway	147	0.283305	1.38727	0.0113903	0.0261584	0.012734	3747	tags=26%, list=15%, signal=22%	5743/2775/4846/1827/4638/2353/23533/5294/4660/5330/952/5997/107/595/4772/5530/93589/816/113/2773/3725/5020/5533/54776/109/4659/4208/10398/5604/3845/5598/5332/1938/57172/781/5567/57118/2771
hsa04750	Inflammatory mediator regulation of TRP channels	91	0.329084	1.48026	0.011588	0.0264302	0.0128663	3609	tags=26%, list=14%, signal=23%	5732/5734/3554/5583/3357/5602/3553/4803/5293/5330/107/5336/59341/816/113/79054/5295/5588/109/3479/3556/5332/5567/5606
hsa05203	Viral carcinogenesis	157	-0.312984	-1.40516	0.0145339	0.0329237	0.0160274	4331	tags=29%, list=17%, signal=24%	5568/6672/9261/6714/1642/5902/7533/578/8841/6908/4193/581/23352/9519/79885/2957/1387/64764/2885/148327/3065/1030/1108/1017/5291/10971/5933/2960/245972/7534/2968/1019/7186/3265/4893/23513/1386/5296/27044/898/6502/1029/1111/9134/890/991
hsa00430	Taurine and hypotaurine metabolism	16	0.563312	1.68651	0.0150555	0.033875	0.0164904	3626	tags=44%, list=14%, signal=37%	2327/2687/51380/2328/1036/84890/2329
hsa04928	Parathyroid hormone synthesis, secretion and action	103	0.30907	1.41873	0.0169617	0.0379077	0.0184536	3959	tags=28%, list=16%, signal=24%	5142/8074/5144/9935/2353/5330/596/2625/107/8600/113/2773/10672/408/468/860/1958/4929/109/4666/4208/11214/5604/5332/5567/2771/6569/142680/1385
hsa03022	Basal transcription factors	43	-0.42994	-1.53287	0.0170812	0.0379202	0.0184597	8268	tags=60%, list=33%, signal=41%	27097/6881/404672/138474/6872/2966/1022/11036/2967/2068/8148/6883/51616/6884/6878/2969/6908/9519/2957/6873/2960/6877/2968/6874/2071/9569
hsa04721	Synaptic vesicle cycle	78	-0.366729	-1.46446	0.0172364	0.0380114	0.0185041	8707	tags=56%, list=35%, signal=37%	8218/10814/6809/8992/1212/6532/773/6616/26052/57084/527/6512/140679/6570/163/160/6531/9114/440279/1759/51382/6857/9152/10815/10312/1173/50617/1211/594855/529/90423/10497/6536/535/523/6804/23545/533/4905/6511/245972/528/9296/1175
hsa05230	Central carbon metabolism in cancer	67	0.340306	1.42503	0.0175842	0.0385232	0.0187532	5030	tags=36%, list=20%, signal=29%	5156/3101/4609/3815/5293/3945/3091/27165/2322/5728/5295/207/5213/5604/3845/441531/2064/23410/5214/5223/3098/2260/10000/8140
hsa00650	Butanoate metabolism	26	0.464101	1.60735	0.0211852	0.0461089	0.0224459	4924	tags=50%, list=20%, signal=40%	64064/54511/6296/3155/3033/35/1962/18/54988/123876/38/7915/348158
hsa04725	Cholinergic synapse	108	0.299974	1.39198	0.0217831	0.0471025	0.0229296	5595	tags=36%, list=22%, signal=28%	2534/2791/2775/54331/5293/2353/23533/5294/5330/3717/596/107/816/113/2773/94235/5295/468/207/109/5604/55970/3845/5332/5567/59345/2771/1385/1139/2788/3768/60482/774/10000/43/775/196883/778/9586
hsa04810	Regulation of actin cytoskeleton	213	0.251597	1.28582	0.0219621	0.0471831	0.0229688	3451	tags=23%, list=14%, signal=20%	6387/730/3680/5156/1398/8826/1902/5880/8074/735/5293/4638/56034/4660/80310/2934/26281/3681/7852/57121/7409/4628/2149/729/9459/6237/89846/3689/10672/5295/10451/207/8516/54776/1793/4659/6548/10398/23365/3676/10788/23191/5604/55970/3845/2255/8395/3690/5962/3684
hsa01521	EGFR tyrosine kinase inhibitor resistance	77	0.316255	1.37585	0.0224649	0.0477645	0.0232519	3412	tags=32%, list=14%, signal=28%	5156/558/3082/5293/6774/56034/2621/80310/7039/3717/596/5728/5336/6194/3084/3716/25759/5295/3569/207/2549/5604/3845/3479/2064
hsa01240	Biosynthesis of cofactors	133	0.279089	1.33694	0.0225196	0.0477645	0.0232519	2980	tags=25%, list=12%, signal=22%	9054/249/212/54658/54657/3242/211/217/10243/27010/7360/6999/26289/4522/2643/5805/219/8564/9104/1723/10797/7365/51727/53354/4143/54659/9249/27430/6470/51601/79717/50808/224
