# Supplementary material for: Exploring key biomarkers of liver fibrosis progression to hepatocellular carcinoma based on immune cell-related genes
Source: Research Square preprint supplement (doi:10.21203/rs.3.rs-6479983/v1), 2025-05-21
Supplement: Supplementary file 6 [file 673e7e2c22d3bbda9ea3b2b2.xlsx]

## Sheet: LYVE1.GOgsea
ONTOLOGY	ID	Description	setSize	enrichmentScore	NES	pvalue	p.adjust	qvalue	rank	leading_edge	core_enrichment
BP	GO:0006956	complement activation	53	0.781753	3.20366	1e-10	2.71038e-09	1.58696e-09	2003	tags=60%, list=8%, signal=56%	10584/5199/730/1675/11326/78989/8547/2220/4239/922/713/1378/715/712/1604/714/2/51279/3543/710/2219/716/3426/3553/735/4153/5648/729/1191/10747/722/325
MF	GO:0140375	immune receptor activity	135	0.639722	3.09443	1e-10	2.71038e-09	1.58696e-09	4564	tags=56%, list=18%, signal=46%	10990/3977/1230/2675/353514/10288/920/10148/3587/2357/2358/11126/8809/2152/9173/11027/1378/3824/3554/8807/51348/2359/10663/728/3459/2207/3568/3575/1441/719/3560/960/3822/729230/2057/1240/3572/3125/2690/3594/7852/972/11025/3821/2322/11026/3598/3113/2674/2213/3953/3122/3111/3117/2833/3566/11024/3805/23547/3455/3559/3811/3556/9180/3593/10803/3119/23765/2854/3588/1236/1232/3454/131450/2209/389400
BP	GO:0002274	myeloid leukocyte activation	210	0.574143	2.94904	1e-10	2.71038e-09	1.58696e-09	3619	tags=48%, list=14%, signal=42%	1776/11326/11314/90865/8530/2358/9173/11027/3162/712/945/2294/1511/695/7048/84106/6283/6352/5880/4615/199/57817/23729/728/7099/7057/55509/3459/10666/3815/4495/10125/2207/5293/7305/7098/7096/1794/6844/3937/820/5294/301/729230/6372/7097/8832/3717/201294/5729/6095/3662/2268/972/6622/3600/120892/6688/9867/5730/7107/640/5336/6504/472/10077/3598/1191/8773/914/5359/8291/2213/306/3689/3725/10538/4067/848…
BP	GO:0002250	adaptive immune response	409	0.536795	2.94453	1e-10	2.71038e-09	1.58696e-09	4408	tags=46%, list=18%, signal=39%	10990/339390/730/10288/920/10148/4092/11126/8809/10332/912/9173/713/1378/715/712/30835/3824/64092/1604/3554/714/8320/2534/7133/695/8631/5551/51279/3543/975/925/962/3142/710/942/716/117157/114836/4615/1520/7099/3426/639/10666/3702/114548/3553/735/6363/2207/10462/5293/3575/608/567/6774/64581/5294/301/79679/89790/3133/7294/3822/4068/729230/4063/23495/3572/3125/10673/939/54900/51311/3594/50852/80380/…
BP	GO:0006261	DNA-templated DNA replication	122	-0.677877	-2.93407	1e-10	2.71038e-09	1.58696e-09	2544	tags=53%, list=10%, signal=48%	5111/59343/348654/63901/5982/9984/222229/51053/10293/79075/50485/1017/5981/54962/51547/10714/10269/56897/64863/11073/9400/11169/79733/3978/8317/84296/1663/3159/9416/55159/5422/30968/55388/5985/990/4174/51659/5557/146956/29980/898/64785/3980/26271/5424/63922/5983/4175/54107/5427/9401/23649/144455/6240/81620/4172/5984/9134/2237/4173/641/4176/4171/8914/10721
BP	GO:0007159	leukocyte cell-cell adhesion	344	0.536409	2.91999	1e-10	2.71038e-09	1.58696e-09	4880	tags=50%, list=19%, signal=41%	6387/339390/11326/11314/1949/10288/920/10148/4092/11126/5621/10332/912/1378/30835/6403/6441/1604/1511/81704/10164/2534/2113/9314/8631/975/7048/3142/6279/942/6352/10875/5880/199/864/6347/26191/2615/114548/3553/6366/6363/58494/10125/3575/6402/567/301/79679/2650/960/3133/6793/729230/3572/3125/10673/939/54900/3594/80380/3717/2736/5105/6401/2737/2625/972/7704/7535/1326/11151/7409/3600/6280/961/79626/2…
CC	GO:0009897	external side of plasma membrane	350	0.534544	2.91482	1e-10	2.71038e-09	1.58696e-09	4257	tags=43%, list=17%, signal=37%	9332/55576/6387/339390/3680/3977/1230/5156/2675/2022/920/2350/10148/4684/5621/10332/2152/912/9173/30835/3824/945/6403/3554/969/2217/7056/3543/925/7048/962/942/2219/114836/7049/10663/1003/762/9936/7099/7057/929/10666/4481/3815/2207/3568/10462/3575/1441/3560/567/64581/301/79679/3133/3822/729230/2239/5023/4063/2057/9976/3572/356/939/2690/51311/3594/948/3681/80380/8832/355/7852/6401/972/1508/2028/382…
BP	GO:1903039	positive regulation of leukocyte cell-cell adhesion	232	0.556601	2.90718	1e-10	2.71038e-09	1.58696e-09	4504	tags=50%, list=18%, signal=42%	1949/10288/920/10148/11126/912/1378/30835/6403/1604/81704/10164/2534/2113/8631/975/7048/3142/942/6352/199/864/6347/26191/114548/3553/6366/6363/10125/3575/567/301/79679/960/3133/729230/3572/3125/10673/939/3594/80380/3717/2736/5105/6401/2737/2625/972/7704/7535/1326/11151/7409/3600/961/240/6504/3115/923/916/3485/3113/160365/8600/2056/959/3122/3111/3689/3707/3117/4067/7412/84868/5588/3569/3932/140885…
BP	GO:0002253	activation of immune response	277	0.545263	2.90356	1e-10	2.71038e-09	1.58696e-09	4073	tags=48%, list=16%, signal=41%	10584/5199/730/1675/11326/11314/78989/8547/2220/4239/2357/2358/922/11126/5621/713/11027/1378/715/712/3824/1997/1604/714/2534/695/8631/2/51279/3543/975/925/79037/5583/710/84106/2219/716/5142/2359/728/7099/3426/26191/919/10666/3702/3553/735/5144/2207/3055/81030/3428/5293/719/7305/3937/149628/64581/79679/7294/3822/4068/1240/3125/54900/50852/4153/596/2625/3635/89857/2268/5648/7535/952/7409/9404/961/3…
BP	GO:1903037	regulation of leukocyte cell-cell adhesion	309	0.537883	2.9029	1e-10	2.71038e-09	1.58696e-09	4593	tags=48%, list=18%, signal=40%	6387/339390/11326/11314/1949/10288/920/10148/4092/11126/5621/912/1378/30835/6403/6441/1604/1511/81704/10164/2534/2113/9314/8631/975/7048/3142/942/6352/10875/199/864/6347/26191/2615/114548/3553/6366/6363/10125/3575/567/301/79679/960/3133/729230/3572/3125/10673/939/54900/3594/80380/3717/2736/5105/6401/2737/2625/972/7704/7535/1326/11151/7409/3600/961/79626/240/6504/3115/445/135/923/916/384/3485/3113…
BP	GO:0031341	regulation of cell killing	93	0.640267	2.90046	1e-10	2.71038e-09	1.58696e-09	4880	tags=58%, list=19%, signal=47%	1776/922/11126/912/3824/1604/1398/5551/114836/10666/10125/3575/7305/567/64581/3133/3822/4068/6372/3594/7409/3823/6688/3821/3106/3136/11035/2213/3122/3134/84868/3565/5788/3902/3075/3805/8417/6850/259197/9437/3593/3684/563/911/5272/5532/177/56253/383/3596/3071/409/6777/3965
BP	GO:0042102	positive regulation of T cell proliferation	98	0.625975	2.88112	1e-10	2.71038e-09	1.58696e-09	5135	tags=59%, list=20%, signal=47%	10288/10148/912/30835/1604/975/7048/942/6352/199/26191/3553/6363/301/79679/3133/729230/3572/10673/3594/80380/3717/7535/11151/3600/6504/3115/923/916/3485/3113/160365/2056/959/7412/84868/5588/3569/3109/3565/5788/6850/7189/941/3479/3559/3593/1947/23308/3280/84433/177/3071/940/6777/3965/54440/29126
MF	GO:0003823	antigen binding	57	0.689839	2.85814	1e-10	2.71038e-09	1.58696e-09	2942	tags=54%, list=12%, signal=48%	8547/2220/4239/10332/912/11027/30835/3824/3543/962/2219/23428/3575/3133/3822/3125/3106/6504/3115/7106/3136/3113/3804/3122/3134/3117/140885/11024/3902/5340/3676
BP	GO:0002697	regulation of immune effector process	321	0.52913	2.8562	1e-10	2.71038e-09	1.58696e-09	5031	tags=50%, list=20%, signal=40%	10584/339390/1776/11326/11314/78989/8547/2220/4092/5322/922/11126/8809/912/1378/3162/3824/11213/1604/2294/3554/7133/695/1398/2/975/3142/710/84106/942/2219/117157/114836/10875/5880/7099/26191/10666/3815/114548/3553/6363/10125/3575/7043/653361/7305/7098/567/64581/301/3133/3822/4068/729230/6372/3125/10225/3594/948/8832/4153/201294/7454/1178/26057/5105/79132/55601/3662/9474/23411/2625/2268/972/8993/7…
BP	GO:0002237	response to molecule of bacterial origin	308	0.524668	2.84067	1e-10	2.71038e-09	1.58696e-09	4266	tags=43%, list=17%, signal=36%	4091/558/654/10288/6915/11093/5732/3587/133/5743/1910/11027/11213/6403/1604/5734/3764/1511/7133/7056/7538/6279/249/942/6352/9450/1668/5142/4615/59307/57817/1667/4846/23729/728/6347/7099/26191/57088/929/54658/114548/3553/3055/834/7096/567/2353/2950/820/9971/199713/5739/6372/7097/23641/356/7054/3394/10225/948/80380/1906/3717/57048/5105/968/6401/2643/128/6622/7431/6280/3164/2920/2149/6688/8564/7079/…
BP	GO:0022409	positive regulation of cell-cell adhesion	273	0.532498	2.82644	1e-10	2.71038e-09	1.58696e-09	4504	tags=48%, list=18%, signal=40%	1949/10288/920/10148/4092/22915/11126/912/1378/30835/288/6403/4651/1604/1511/81704/10164/2534/2113/8631/975/7048/3142/942/6352/199/864/6347/26191/114548/3553/6366/6363/10125/3575/567/301/79679/960/3133/729230/3572/3125/10673/939/3594/10370/80380/3717/2736/10272/5105/6401/2737/2625/972/7704/7535/1326/11151/7409/3600/961/240/6504/3115/923/916/3485/3113/160365/8600/2056/959/3122/3111/3689/3707/3117/…
BP	GO:0031343	positive regulation of cell killing	60	0.672277	2.81901	1e-10	2.71038e-09	1.58696e-09	3726	tags=52%, list=15%, signal=44%	922/11126/912/3824/5551/114836/10666/10125/7305/567/64581/3133/3822/4068/3594/7409/3823/6688/3106/3136/3122/3134/5788/3902/8417/6850/259197/3593/3684/563/911
CC	GO:0000775	chromosome, centromeric region	165	-0.625208	-2.81189	1e-10	2.71038e-09	1.58696e-09	3657	tags=53%, list=15%, signal=46%	2332/6612/81929/23244/5515/10664/25942/10540/25936/23421/23310/114991/5501/27127/7158/55839/222229/55920/84516/23291/55746/79075/3297/701/348995/1059/8655/11243/1639/1616/84295/55166/25909/5905/23468/7514/7756/9183/5885/2491/10274/401541/57122/5525/54821/79023/11335/10403/79980/83540/79902/27085/1786/10615/81930/9918/11339/55055/9793/6839/3070/9735/57405/4085/81620/11130/91687/3619/64105/1062/790…
BP	GO:0000819	sister chromatid segregation	168	-0.624387	-2.81151	1e-10	2.71038e-09	1.58696e-09	3501	tags=50%, list=14%, signal=43%	23212/81929/23244/10664/225689/27175/10540/25936/23310/23636/84861/348654/54441/27127/10726/10300/10459/27436/64940/79075/701/64682/9031/23126/5889/51433/7756/9183/51434/5885/1663/84722/10274/286053/10460/9700/7517/990/146909/29781/10403/79980/83540/26271/10615/81930/9918/10592/55755/55055/8697/51529/9735/4085/54892/81620/11130/9319/64105/2237/1062/7283/24137/4751/9493/9928/1063/11004/699/891/641…
BP	GO:0000070	mitotic sister chromatid segregation	142	-0.638328	-2.81106	1e-10	2.71038e-09	1.58696e-09	3501	tags=53%, list=14%, signal=46%	23212/81929/23244/27175/10540/25936/23310/23636/84861/348654/27127/10726/10300/10459/27436/79075/701/64682/9031/23126/51433/7756/9183/51434/5885/84722/286053/10460/9700/7517/990/146909/29781/10403/79980/83540/26271/10615/81930/9918/10592/55755/55055/8697/51529/9735/4085/54892/81620/11130/9319/64105/1062/7283/24137/4751/9493/9928/1063/11004/699/891/64151/9212/55143/10051/9232/29127/7272/991/9055/3…
BP	GO:0002443	leukocyte mediated immunity	351	0.514006	2.8088	1e-10	2.71038e-09	1.58696e-09	4880	tags=49%, list=19%, signal=40%	339390/1776/730/11314/1621/4092/11126/8809/912/713/1378/715/3162/712/3824/1604/2294/3554/714/1511/7133/695/1398/5551/51279/3543/975/925/710/84106/716/117157/114836/5880/4615/7099/3426/10666/3815/114548/3553/735/10125/2207/3002/5293/3575/7305/7098/6844/567/4818/64581/5294/3133/3822/4068/729230/6372/3125/939/51311/10225/3594/8832/4153/201294/7454/1178/5729/2625/3635/2268/972/11151/7409/3823/6688/72…
BP	GO:0001910	regulation of leukocyte mediated cytotoxicity	79	0.640337	2.80853	1e-10	2.71038e-09	1.58696e-09	4880	tags=58%, list=19%, signal=47%	1776/11126/912/3824/1398/114836/10666/10125/3575/7305/567/3133/3822/4068/6372/3594/7409/3823/6688/3821/3106/3136/11035/2213/3122/3134/84868/5788/3902/3805/8417/259197/9437/3593/3684/563/911/5272/5532/177/56253/383/3071/409/6777/3965
BP	GO:0098813	nuclear chromosome segregation	223	-0.600486	-2.80344	1e-10	2.71038e-09	1.58696e-09	3658	tags=48%, list=15%, signal=41%	8658/80198/27030/1778/23212/81929/23244/10664/225689/27175/10540/25936/23310/23636/84861/348654/54441/27127/10726/10300/10459/10919/55920/27436/64940/79075/701/150465/64682/51547/83990/9031/55166/29893/23126/5889/51433/7756/9183/51434/5885/1663/84722/10274/286053/10460/9700/7517/990/146909/29781/10403/79980/4439/83540/146956/898/26271/10615/81930/80010/9918/10592/55755/55055/8697/51529/9735/57405…
BP	GO:0032496	response to lipopolysaccharide	293	0.522054	2.80049	1e-10	2.71038e-09	1.58696e-09	4266	tags=42%, list=17%, signal=36%	4091/558/654/10288/6915/11093/5732/3587/133/5743/1910/11027/11213/6403/1604/5734/3764/1511/7133/7056/7538/6279/249/942/6352/9450/1668/5142/4615/59307/57817/1667/4846/23729/6347/7099/26191/57088/929/54658/114548/3553/3055/834/2353/2950/820/9971/199713/5739/6372/7097/23641/356/7054/3394/10225/948/80380/1906/3717/57048/5105/968/6401/2643/128/6622/7431/6280/3164/2920/2149/6688/8564/7079/5336/4353/445…
BP	GO:0002269	leukocyte activation involved in inflammatory response	45	0.70611	2.79907	1e-10	2.71038e-09	1.58696e-09	4632	tags=71%, list=18%, signal=58%	8530/2358/712/4615/199/728/3459/7305/7098/7097/3717/6622/120892/472/1191/3689/3725/3569/3565/5788/3949/6348/10333/7124/3684/566/351/1075/177/23208/4317/3596
BP	GO:0050870	positive regulation of T cell activation	212	0.54514	2.79552	1e-10	2.71038e-09	1.58696e-09	4880	tags=51%, list=19%, signal=42%	1949/10288/920/10148/11126/912/1378/30835/1604/81704/2534/975/7048/3142/942/6352/199/864/6347/26191/114548/3553/6366/6363/10125/3575/567/301/79679/3133/729230/3572/3125/10673/939/3594/80380/3717/2736/5105/2737/2625/972/7704/7535/1326/11151/7409/3600/961/6504/3115/923/916/3485/3113/160365/8600/2056/959/3122/3111/3707/3117/4067/7412/84868/5588/3569/3932/140885/207/3109/3566/3565/5788/604/11006/3126…
BP	GO:0071706	tumor necrosis factor superfamily cytokine production	155	0.566842	2.79537	1e-10	2.71038e-09	1.58696e-09	5203	tags=55%, list=21%, signal=44%	90865/353514/558/11027/945/11213/7538/942/4615/7099/26191/7057/929/3459/1536/6363/4939/10125/7305/7098/7096/2950/6774/64581/9971/3133/729230/2621/7097/948/8832/3717/64135/961/120892/23405/5336/2841/6504/1191/914/5443/23643/384/50856/1535/4938/84868/5295/3569/140885/3565/5788/6348/11006/54206/114900/23547/6850/2048/3479/245928/54106/284/5663/3593/5724/566/706/64170/1139/351/10457/943/9590/177/2320…
BP	GO:1903555	regulation of tumor necrosis factor superfamily cytokine production	155	0.566842	2.79537	1e-10	2.71038e-09	1.58696e-09	5203	tags=55%, list=21%, signal=44%	90865/353514/558/11027/945/11213/7538/942/4615/7099/26191/7057/929/3459/1536/6363/4939/10125/7305/7098/7096/2950/6774/64581/9971/3133/729230/2621/7097/948/8832/3717/64135/961/120892/23405/5336/2841/6504/1191/914/5443/23643/384/50856/1535/4938/84868/5295/3569/140885/3565/5788/6348/11006/54206/114900/23547/6850/2048/3479/245928/54106/284/5663/3593/5724/566/706/64170/1139/351/10457/943/9590/177/2320…
BP	GO:0002460	adaptive immune response based on somatic recombination of immune receptors built from immunoglobulin superfamily domains	276	0.521779	2.7845	1e-10	2.71038e-09	1.58696e-09	4783	tags=48%, list=19%, signal=39%	339390/730/920/10148/4092/8809/912/9173/713/1378/715/712/3824/1604/3554/714/7133/695/5551/51279/3543/975/925/3142/710/716/114836/4615/7099/3426/10666/114548/3553/735/6363/2207/3575/567/6774/64581/301/3133/729230/4063/3125/10673/939/51311/3594/4153/201294/7454/1178/6095/3662/2625/3635/89857/972/729/3821/91543/3106/6504/3115/3598/1191/3665/10747/3136/3113/722/959/11035/325/2213/3122/3134/3111/3117/…
BP	GO:0032640	tumor necrosis factor production	150	0.567279	2.78196	1e-10	2.71038e-09	1.58696e-09	5203	tags=56%, list=21%, signal=45%	90865/353514/558/11027/945/11213/7538/4615/7099/26191/7057/929/3459/1536/6363/4939/10125/7305/7098/7096/2950/6774/64581/9971/3133/729230/2621/7097/948/8832/3717/64135/961/120892/23405/5336/2841/6504/1191/914/5443/23643/384/50856/1535/4938/84868/5295/3569/140885/3565/5788/6348/11006/54206/114900/23547/6850/2048/3479/245928/54106/284/5663/3593/5724/566/706/64170/1139/351/10457/943/9590/177/23208/43…
BP	GO:0032680	regulation of tumor necrosis factor production	150	0.567279	2.78196	1e-10	2.71038e-09	1.58696e-09	5203	tags=56%, list=21%, signal=45%	90865/353514/558/11027/945/11213/7538/4615/7099/26191/7057/929/3459/1536/6363/4939/10125/7305/7098/7096/2950/6774/64581/9971/3133/729230/2621/7097/948/8832/3717/64135/961/120892/23405/5336/2841/6504/1191/914/5443/23643/384/50856/1535/4938/84868/5295/3569/140885/3565/5788/6348/11006/54206/114900/23547/6850/2048/3479/245928/54106/284/5663/3593/5724/566/706/64170/1139/351/10457/943/9590/177/23208/43…
BP	GO:0050671	positive regulation of lymphocyte proliferation	135	0.573992	2.77648	1e-10	2.71038e-09	1.58696e-09	5135	tags=55%, list=20%, signal=44%	10288/10148/912/30835/1604/975/7048/942/6352/4615/199/7099/26191/3553/6363/301/79679/3133/729230/3572/10673/3594/80380/3717/596/972/7535/952/11151/3600/6504/3115/923/916/3485/3113/160365/2056/959/7412/84868/5588/3569/10451/3109/115352/3565/5788/604/4208/6850/7189/2048/941/2255/3479/3559/54106/3593/3574/1947/79915/23308/3280/84433/177/3596/3071/940/6777/3965/54440/683/29126
BP	GO:0071219	cellular response to molecule of bacterial origin	194	0.54703	2.77406	1e-10	2.71038e-09	1.58696e-09	3704	tags=42%, list=15%, signal=36%	558/654/10288/6915/11093/1910/11027/1604/1511/7133/7538/942/6352/9450/1668/5142/4615/59307/57817/1667/4846/23729/6347/7099/26191/57088/929/114548/3553/3055/834/7096/2950/820/9971/199713/6372/7097/23641/3394/948/80380/3717/57048/968/7431/2920/6688/8564/5336/445/23643/923/22933/2213/23328/4067/84868/3569/140885/207/1669/6348/4064/245937/4208/10892/7189/1051/2048/4790/51510/2672/941/10333/22904/2459…
BP	GO:0032944	regulation of mononuclear cell proliferation	217	0.536425	2.77206	1e-10	2.71038e-09	1.58696e-09	4880	tags=49%, list=19%, signal=40%	339390/11326/11314/10288/10148/5621/912/1378/30835/6441/1604/7133/695/7940/975/7048/942/6352/5880/4615/199/7099/26191/2615/3553/6363/7305/301/79679/3133/729230/23495/3572/10673/3594/80380/3717/1178/596/3635/972/7535/952/11151/3600/640/6504/472/3115/923/916/384/3485/3113/160365/2056/959/11035/2213/57045/4067/7412/84868/5588/3569/10451/3109/115352/3565/3958/5788/604/3659/8379/11006/4208/944/6850/71…
BP	GO:0070663	regulation of leukocyte proliferation	235	0.531624	2.77105	1e-10	2.71038e-09	1.58696e-09	3448	tags=41%, list=14%, signal=36%	339390/11326/11314/90865/10288/10148/5621/1436/912/1378/30835/6441/1604/7133/695/7940/975/7048/942/6352/5880/4615/199/7099/26191/2615/3553/6363/3568/7305/2950/301/79679/3133/729230/23495/3572/10673/3594/80380/3717/1178/596/3635/972/7535/952/11151/3600/640/6504/472/3115/684/923/916/384/3485/3113/160365/2056/959/11035/2213/57045/4067/7412/84868/5588/3569/10451/3109/115352/3565/3958/5788/604/3659/83…
BP	GO:0050670	regulation of lymphocyte proliferation	214	0.539538	2.76903	1e-10	2.71038e-09	1.58696e-09	4880	tags=50%, list=19%, signal=41%	339390/11326/11314/10288/10148/5621/912/1378/30835/6441/1604/7133/695/7940/975/7048/942/6352/5880/4615/199/7099/26191/2615/3553/6363/7305/301/79679/3133/729230/23495/3572/10673/3594/80380/3717/1178/596/3635/972/7535/952/11151/3600/640/6504/472/3115/923/916/384/3485/3113/160365/2056/959/11035/2213/57045/4067/7412/84868/5588/3569/10451/3109/115352/3565/3958/5788/604/3659/8379/11006/4208/944/6850/71…
BP	GO:0061900	glial cell activation	48	0.689896	2.76431	1e-10	2.71038e-09	1.58696e-09	4632	tags=73%, list=18%, signal=60%	8530/2358/712/199/728/3459/3553/4035/7305/7098/7097/3717/6622/120892/472/1191/135/3689/3725/3569/3565/5788/3949/6348/10333/7124/5663/3684/566/351/1075/177/23208/4317/3596
BP	GO:0070665	positive regulation of leukocyte proliferation	149	0.562956	2.76276	1e-10	2.71038e-09	1.58696e-09	5135	tags=53%, list=20%, signal=42%	10288/10148/1436/912/30835/1604/975/7048/942/6352/4615/199/7099/26191/3553/6363/3568/301/79679/3133/729230/3572/10673/3594/80380/3717/596/972/7535/952/11151/3600/6504/3115/684/923/916/3485/3113/160365/2056/959/4067/7412/84868/5588/3569/10451/3109/115352/3565/5788/604/4208/6850/7189/2048/941/2255/3479/3559/54106/3593/3574/1947/79915/23308/3280/84433/177/3596/3071/940/1437/6777/3965/54440/683/29126
BP	GO:0032946	positive regulation of mononuclear cell proliferation	137	0.569478	2.76092	1e-10	2.71038e-09	1.58696e-09	5135	tags=54%, list=20%, signal=43%	10288/10148/912/30835/1604/975/7048/942/6352/4615/199/7099/26191/3553/6363/301/79679/3133/729230/3572/10673/3594/80380/3717/596/972/7535/952/11151/3600/6504/3115/923/916/3485/3113/160365/2056/959/7412/84868/5588/3569/10451/3109/115352/3565/5788/604/4208/6850/7189/2048/941/2255/3479/3559/54106/3593/3574/1947/79915/23308/3280/84433/177/3596/3071/940/6777/3965/54440/683/29126
MF	GO:0019955	cytokine binding	126	0.579487	2.76068	1e-10	2.71038e-09	1.58696e-09	4521	tags=48%, list=18%, signal=40%	3977/1230/2022/920/10148/3587/8809/1436/9173/3554/7133/7837/2/94/8425/7132/7048/7538/7049/10663/659/7057/3459/2615/3815/3568/7043/1441/3560/729230/199713/3572/8646/2690/3594/948/7852/972/64388/25987/3598/147138/3953/57045/8692/2833/8829/3676/3559/3690/9180/3593/10803/3557/4681/1236/1232/3454/657/9241/2247
BP	GO:0050866	negative regulation of cell activation	189	0.544125	2.75937	1e-10	2.71038e-09	1.58696e-09	3504	tags=42%, list=14%, signal=37%	339390/11326/11314/6422/5156/114897/558/10288/8530/4092/5621/11117/1378/3162/64092/6441/114757/2294/1511/695/7940/7056/3142/942/10875/10461/864/4846/26191/2615/7305/301/79679/3398/729230/374403/23495/54900/80380/8832/2737/3635/2268/972/8993/6688/79626/640/472/10077/3598/135/384/2213/3134/10464/57045/7805/4067/84868/3566/3565/3958/5788/84695/604/3949/3659/8379/3902/11006/56940/18/10019/1051/941/27…
BP	GO:0006260	DNA replication	225	-0.5893	-2.75575	1e-10	2.71038e-09	1.58696e-09	3635	tags=48%, list=14%, signal=42%	80198/25792/10856/80174/1763/23244/5515/5429/116447/146059/25942/4798/3060/5111/59343/348654/6749/63901/29844/7270/79913/6119/5982/9984/222229/10919/51053/23560/10293/56953/79075/50485/1017/5981/54962/4678/51547/10714/10269/56897/64863/86/11073/9400/11169/51377/79733/246243/3978/57695/8317/11124/84296/1663/3159/9416/10036/1854/54108/8607/55159/5422/30968/55388/5985/1660/990/4174/11198/51659/8208/…
BP	GO:0007059	chromosome segregation	270	-0.58185	-2.7536	1e-10	2.71038e-09	1.58696e-09	3658	tags=47%, list=15%, signal=40%	8658/80198/27030/1778/23212/81929/23244/10664/225689/27175/10540/25936/23310/23636/84861/8815/348654/7329/54441/27127/7156/55839/10726/10300/10459/10919/11011/55920/27436/64940/1104/284086/79075/1457/701/348995/150465/64682/51547/83990/292/11243/9400/9031/55166/29893/23126/5889/51433/7756/9183/51434/5885/1663/84722/10274/286053/10460/9700/7517/79023/990/146909/29781/8940/10403/79980/4439/83540/14…
BP	GO:0006909	phagocytosis	220	0.532679	2.75168	1e-10	2.71038e-09	1.58696e-09	3619	tags=42%, list=14%, signal=36%	10584/8685/8406/11314/78989/8547/2220/558/5322/2358/6441/2534/3543/2219/55647/5880/4615/199/10461/6347/9936/7099/7057/929/4481/3553/375033/2207/3055/4035/3560/7305/1794/64581/301/3385/729230/2621/2934/7097/3394/4689/84162/948/4153/201294/9474/2268/9938/11151/7409/3600/961/5336/6504/11031/135/5359/8291/5031/1535/722/2213/3953/306/3689/56990/4067/311/5175/10451/140885/114786/5788/1793/3949/51552/64…
BP	GO:0050863	regulation of T cell activation	315	0.507927	2.74802	1e-10	2.71038e-09	1.58696e-09	4402	tags=44%, list=17%, signal=37%	339390/11326/11314/1949/10288/920/10148/4092/11126/5621/912/1378/30835/6441/1604/1511/81704/2534/7133/975/7048/3142/942/6352/10875/5880/199/864/6347/26191/639/2615/114548/3553/6366/6363/10125/3575/567/301/79679/3133/729230/3572/3125/10673/939/54900/3594/80380/3717/2736/1178/5105/3662/2737/2625/972/7704/7535/1326/11151/7409/3600/961/79626/6504/3115/914/135/923/916/384/3485/3113/160365/8600/2056/95…
BP	GO:0002449	lymphocyte mediated immunity	269	0.518063	2.74416	1e-10	2.71038e-09	1.58696e-09	4880	tags=49%, list=19%, signal=40%	339390/730/4092/11126/8809/912/713/1378/715/712/3824/1604/3554/714/7133/695/1398/5551/51279/3543/975/925/710/716/117157/114836/4615/3426/10666/114548/3553/735/10125/2207/3002/3575/567/4818/3133/3822/4068/729230/3125/939/51311/10225/3594/4153/201294/7454/1178/2625/3635/972/11151/7409/3823/729/3821/91543/3106/6504/3115/3598/1191/3665/10747/3136/3113/722/959/11035/325/2213/3122/3134/3111/3117/10538/…
BP	GO:0071222	cellular response to lipopolysaccharide	186	0.545115	2.74061	1e-10	2.71038e-09	1.58696e-09	3704	tags=41%, list=15%, signal=36%	558/654/10288/6915/11093/1910/11027/1604/1511/7133/7538/942/6352/9450/1668/5142/4615/59307/57817/1667/4846/23729/6347/7099/26191/57088/929/114548/3553/3055/834/2950/820/9971/199713/6372/7097/23641/3394/948/80380/3717/57048/968/7431/2920/6688/8564/5336/445/23643/923/23328/4067/84868/3569/140885/207/1669/6348/4064/4208/10892/7189/1051/2048/4790/51510/2672/941/22904/245928/7124/3593/5724/5606/706
CC	GO:0000779	condensed chromosome, centromeric region	119	-0.636043	-2.73786	1e-10	2.71038e-09	1.58696e-09	3162	tags=53%, list=13%, signal=47%	25942/10540/25936/23421/23310/5501/7158/55839/222229/84516/23291/55746/3297/701/348995/1059/8655/11243/1639/84295/55166/25909/5905/23468/7514/7756/9183/2491/57122/54821/79023/11335/10403/79980/83540/79902/27085/10615/81930/9918/55055/9793/9735/57405/4085/81620/11130/3619/64105/1062/79019/4751/147841/1063/11004/1058/699/891/64151/9212/332/7272/55355
BP	GO:0006959	humoral immune response	215	0.529553	2.73167	1e-10	2.71038e-09	1.58696e-09	3853	tags=38%, list=15%, signal=33%	10584/5199/730/1675/11326/78989/8547/2220/10148/4239/922/9547/713/1378/715/712/6441/1604/714/1511/2/51279/3543/975/710/6283/6039/2219/716/1668/1667/6347/3426/3553/735/820/2627/3133/4068/729230/6037/6372/4153/596/2625/5648/8993/6280/2920/729/240/1191/10747/5450/722/325/2213/116842/5452/3445/3569/1669/5788/653423/3075/4208/54210/6556/3263/5699/27242/7124/3574/3456/3119/6357/566/3078/731/2244/10406/…
CC	GO:0098687	chromosomal region	272	-0.575889	-2.73092	1e-10	2.71038e-09	1.58696e-09	4935	tags=53%, list=20%, signal=43%	9894/5499/5514/2547/10111/23279/5884/11016/2072/80145/65986/25913/65057/6672/7486/79643/51750/1642/7015/8658/2332/6612/1763/11200/81929/23244/5515/10664/25942/10540/25936/23421/23310/9025/114991/84321/5111/5501/27127/7158/55839/9984/222229/79228/55920/9219/84661/84516/23291/55746/55226/79075/1108/1017/3297/701/348995/1059/4436/8655/57459/11243/1639/56897/4221/8563/328/1616/84295/55166/25909/5905/…
BP	GO:0070661	leukocyte proliferation	308	0.503926	2.72837	1e-10	2.71038e-09	1.58696e-09	3504	tags=39%, list=14%, signal=34%	339390/11326/11314/90865/10288/10148/5621/1436/912/1378/30835/6441/1604/81704/2534/7133/695/7940/975/7048/942/6352/5880/4615/199/7099/26191/2615/3815/3553/6363/10125/3568/3575/7305/1794/2950/5294/301/79679/3133/729230/23495/3572/10673/3594/80380/3717/1178/596/3635/972/7535/952/11151/3600/2322/640/6194/6504/472/3115/684/1191/64343/923/916/384/3485/3113/160365/8600/2056/959/11035/2213/973/57045/406…
BP	GO:0050867	positive regulation of cell activation	331	0.501332	2.722	1e-10	2.71038e-09	1.58696e-09	5135	tags=50%, list=20%, signal=40%	1949/90865/353514/558/10288/920/10148/11126/912/9173/11027/1378/30835/6403/1604/81704/2534/695/3543/975/7048/3142/942/6352/4615/199/57817/864/6347/7099/26191/7057/10666/114548/3553/6366/6363/10125/3575/7305/6665/567/64581/301/79679/3133/3822/729230/2621/3572/3125/10673/939/3594/80380/3717/2736/5105/596/5341/2737/2625/3635/2268/972/7704/7535/952/1326/11151/7409/3600/961/120892/6504/3115/914/923/91…
BP	GO:0002768	immune response-regulating cell surface receptor signaling pathway	229	0.523417	2.72081	1e-10	2.71038e-09	1.58696e-09	4732	tags=51%, list=19%, signal=42%	11314/10288/2357/2358/11126/5621/11027/1378/3824/1997/2534/695/8631/3543/975/925/79037/5583/84106/2219/5142/2359/728/26191/919/10666/3702/5602/3815/5144/2207/3055/5293/719/7305/3937/64581/79679/7294/3822/4068/1240/3125/54900/50852/4153/5609/596/2625/3635/89857/2268/7535/952/7409/9404/961/3823/3821/640/5336/2206/3115/6416/5359/660/2213/56244/973/7805/84174/4067/5588/3932/10451/3802/115352/3958/578…
BP	GO:0042110	T cell activation	467	0.484916	2.72025	1e-10	2.71038e-09	1.58696e-09	4406	tags=44%, list=18%, signal=37%	339390/11326/11314/1949/10288/920/10148/4092/11126/8809/5621/912/1378/30835/6441/1604/5734/1511/8320/81704/2534/7133/975/925/7048/962/3142/942/6352/677/114836/10875/5880/199/864/6347/26191/639/2615/3702/3815/114548/3553/6366/6363/10125/2207/5293/9935/3575/84941/1794/567/4818/678/6774/64581/5294/301/79679/960/3133/729230/4063/2934/3572/3125/10673/939/54900/3594/80380/8832/3717/2736/7454/1178/5105/…
BP	GO:0022407	regulation of cell-cell adhesion	409	0.495837	2.71986	1e-10	2.71038e-09	1.58696e-09	4402	tags=44%, list=17%, signal=36%	6387/339390/11326/11314/1949/114897/654/10288/920/10148/4092/22915/11126/5621/912/1378/30835/288/6403/4651/6441/1604/1511/81704/10164/2534/2113/9314/8631/975/7048/3142/942/6352/10875/199/864/6347/26191/2615/114548/3553/6366/6363/10125/3575/567/301/80709/79679/960/3133/729230/3572/3125/10673/939/54900/3594/10370/80380/3717/2736/10272/5105/6401/2737/2625/91663/972/7704/7535/1326/11151/7409/3600/961…
BP	GO:0002698	negative regulation of immune effector process	109	0.580517	2.71808	1e-10	2.71038e-09	1.58696e-09	3504	tags=44%, list=14%, signal=38%	339390/11326/11314/4092/1378/3162/3824/11213/1604/2294/1398/2/3142/710/10875/3575/7043/301/3133/729230/10225/8832/8993/961/6688/3821/3106/6504/684/3598/722/2213/3134/84868/115352/3566/3565/3958/5788/84695/604/11006/3805/56940/335/7124/284/3456
BP	GO:0150076	neuroinflammatory response	63	0.647969	2.71452	1e-10	2.71038e-09	1.58696e-09	4632	tags=67%, list=18%, signal=55%	90865/8530/2358/5743/712/7133/199/728/3459/3553/4035/7305/7098/7097/3717/6622/107/120892/5336/472/1191/135/3689/3725/3569/3565/5788/3949/6348/3479/10333/7124/5663/3684/566/351/1075/177/23208/4317/131450/3596
BP	GO:0007091	metaphase/anaphase transition of mitotic cell cycle	58	-0.709177	-2.71002	1e-10	2.71038e-09	1.58696e-09	2695	tags=57%, list=11%, signal=51%	84861/348654/10459/701/64682/51433/7756/9183/51434/5885/286053/10460/9700/7517/990/10403/26271/55755/55055/8697/51529/9735/4085/81620/11130/9319/1062/1063/699/891/9212/7272/11065
BP	GO:0046651	lymphocyte proliferation	277	0.508671	2.70871	1e-10	2.71038e-09	1.58696e-09	3504	tags=40%, list=14%, signal=35%	339390/11326/11314/10288/10148/5621/912/1378/30835/6441/1604/81704/2534/7133/695/7940/975/7048/942/6352/5880/4615/199/7099/26191/2615/3553/6363/10125/3575/7305/1794/5294/301/79679/3133/729230/23495/3572/10673/3594/80380/3717/1178/596/3635/972/7535/952/11151/3600/2322/640/6194/6504/472/3115/64343/923/916/384/3485/3113/160365/2056/959/11035/2213/973/57045/4067/3445/7412/84868/5588/3569/10451/3109/2…
BP	GO:0051306	mitotic sister chromatid separation	63	-0.692944	-2.70635	1e-10	2.71038e-09	1.58696e-09	1528	tags=56%, list=6%, signal=52%	84861/348654/10459/701/64682/51433/7756/9183/51434/5885/286053/10460/9700/7517/990/29781/10403/26271/55755/55055/8697/51529/9735/4085/81620/11130/9319/1062/1063/699/891/9212/9232/7272/11065
BP	GO:0097529	myeloid leukocyte migration	205	0.5295	2.70576	1e-10	2.71038e-09	1.58696e-09	3663	tags=41%, list=15%, signal=35%	6387/6368/3680/11314/1230/6359/64805/2358/1436/1910/11117/6441/5734/3554/1511/975/6279/6283/6352/5641/5142/5880/4615/199/728/6347/7057/6369/3815/3553/6366/6363/2207/5293/1441/719/5294/301/729230/80310/9353/6372/1240/388372/1906/972/7409/6280/961/2920/6688/4920/414062/59341/6504/796/8600/4354/7424/3689/4067/5175/3569/10451/140885/83700/3565/3958/6349/6348/245937/6288/54210/57580/6850/391/2185/7989…
BP	GO:0002718	regulation of cytokine production involved in immune response	92	0.598515	2.70473	1e-10	2.71038e-09	1.58696e-09	3504	tags=49%, list=14%, signal=42%	4092/11126/8809/3162/11213/1604/3554/7133/695/975/7099/10666/3815/114548/3553/7043/7098/567/64581/3133/729230/10225/948/1178/9474/23411/2625/972/91543/5336/6504/684/3134/7805/3569/3565/604/11006/3805/10892/7189/335/7124/284/3456
BP	GO:0042098	T cell proliferation	190	0.531214	2.70129	1e-10	2.71038e-09	1.58696e-09	4880	tags=50%, list=19%, signal=41%	339390/11326/10288/10148/5621/912/1378/30835/6441/1604/81704/2534/7133/975/7048/942/6352/5880/199/26191/2615/3553/6363/10125/1794/5294/301/79679/3133/729230/3572/10673/3594/80380/3717/1178/7535/11151/3600/6194/6504/3115/923/916/384/3485/3113/160365/2056/959/11035/57045/7412/84868/5588/3569/3109/2697/3565/3958/5788/3659/8379/11006/896/10892/944/6850/7189/1051/6556/55716/941/54361/5699/3479/27242/3…
BP	GO:0032612	interleukin-1 production	99	0.587234	2.6985	1e-10	2.71038e-09	1.58696e-09	5179	tags=55%, list=21%, signal=43%	353514/11027/945/4615/7099/114548/6363/3428/834/7305/149628/2950/6774/64581/301/9971/199713/2621/3603/51311/948/3717/2149/58484/384/115362/84868/3569/140885/1958/6348/11006/54206/6288/10892/9447/3479/10333/335/7124/24145/566/10972/55655/1236/1992/351/177/3098/4332/409/3965/51738/91662
BP	GO:0032652	regulation of interleukin-1 production	99	0.587234	2.6985	1e-10	2.71038e-09	1.58696e-09	5179	tags=55%, list=21%, signal=43%	353514/11027/945/4615/7099/114548/6363/3428/834/7305/149628/2950/6774/64581/301/9971/199713/2621/3603/51311/948/3717/2149/58484/384/115362/84868/3569/140885/1958/6348/11006/54206/6288/10892/9447/3479/10333/335/7124/24145/566/10972/55655/1236/1992/351/177/3098/4332/409/3965/51738/91662
CC	GO:0000793	condensed chromosome	200	-0.585879	-2.69727	1e-10	2.71038e-09	1.58696e-09	3614	tags=48%, list=14%, signal=41%	6612/27030/23212/6002/81929/10664/25942/10540/25936/23421/23310/8815/5501/7329/54441/27127/7158/55839/222229/84516/23291/64940/1104/55746/1017/3297/701/348995/1059/8655/11243/1639/11073/84295/9031/55166/29893/25909/5905/23468/5883/7514/7756/9183/10128/5885/65083/2491/10274/286053/57122/54821/79023/11335/8940/10403/79980/83540/79902/27085/10615/81930/9918/10592/672/55055/9793/6839/9735/57405/4085/…
BP	GO:0002683	negative regulation of immune system process	370	0.494539	2.69605	1e-10	2.71038e-09	1.58696e-09	3421	tags=38%, list=14%, signal=33%	6387/339390/11326/11314/6422/558/10288/8530/4092/11126/5621/653/9173/11117/1378/3162/3824/1997/64092/11213/6441/1604/5734/2294/714/1511/2534/695/1398/7940/2/79037/3142/710/942/4889/10875/1831/10461/864/6347/7099/26191/7057/2615/4609/6366/3055/3428/9935/3575/7043/7305/7098/301/79679/3133/3398/4068/729230/9353/374403/23495/54900/10225/80380/8832/10272/968/79132/2737/3635/2268/972/8993/11025/9404/96…
BP	GO:0032943	mononuclear cell proliferation	281	0.506135	2.69586	1e-10	2.71038e-09	1.58696e-09	3504	tags=40%, list=14%, signal=34%	339390/11326/11314/10288/10148/5621/912/1378/30835/6441/1604/81704/2534/7133/695/7940/975/7048/942/6352/5880/4615/199/7099/26191/2615/3553/6363/10125/3575/7305/1794/5294/301/79679/3133/729230/23495/3572/10673/3594/80380/3717/1178/596/3635/972/7535/952/11151/3600/2322/640/6194/6504/472/3115/64343/923/916/384/3485/3113/160365/2056/959/11035/2213/973/57045/4067/3445/7412/84868/5588/3569/10451/3109/2…
BP	GO:0050778	positive regulation of immune response	458	0.480997	2.68624	1e-10	2.71038e-09	1.58696e-09	4073	tags=42%, list=16%, signal=36%	10584/5199/730/1675/11326/11314/78989/8547/2220/920/4239/5322/2357/2358/922/11126/8809/5621/912/713/11027/1378/715/712/3824/1997/1604/3554/714/1511/2534/695/8631/2/51279/3543/975/925/79037/3142/5583/710/84106/942/2219/6352/716/117157/114836/5142/2359/728/7099/3426/26191/919/10666/3702/114548/3553/735/6363/10125/5144/2207/3055/81030/3428/5293/719/7305/3937/567/149628/64581/301/79679/3133/7294/3822…
BP	GO:0002709	regulation of T cell mediated immunity	86	0.595602	2.68481	1e-10	2.71038e-09	1.58696e-09	3726	tags=48%, list=15%, signal=41%	339390/4092/8809/912/3824/1604/3554/7133/975/114548/3553/3575/567/3133/729230/3125/3594/7454/1178/2625/3821/91543/3106/6504/3136/11035/2213/3122/3134/3569/3565/5788/11006/56940/10892/8417/7189/3593/3456/563/911
BP	GO:0002694	regulation of leukocyte activation	498	0.47537	2.68099	1e-10	2.71038e-09	1.58696e-09	5135	tags=47%, list=20%, signal=38%	339390/11326/11314/6422/1949/90865/558/10288/920/10148/8530/4092/11126/5621/912/9173/1378/3162/30835/945/64092/6441/1604/2294/1511/81704/2534/7133/695/7940/3543/975/7048/3142/84106/942/6352/677/10875/5880/4615/199/57817/10461/864/23729/6347/7099/26191/7057/639/10666/2615/114548/3553/6366/6363/10125/3575/7305/567/678/64581/301/79679/3133/3398/3822/729230/2621/374403/23495/3572/3125/10673/939/54900…
BP	GO:0006270	DNA replication initiation	27	-0.832417	-2.68043	1e-10	2.71038e-09	1.58696e-09	2082	tags=74%, list=8%, signal=68%	222229/51053/1017/56897/11073/5422/55388/990/4174/5557/898/64785/4175/23649/81620/4172/9134/4173/4176/4171
BP	GO:0010965	regulation of mitotic sister chromatid separation	60	-0.697335	-2.67954	1e-10	2.71038e-09	1.58696e-09	1528	tags=57%, list=6%, signal=53%	84861/348654/10459/701/64682/51433/7756/9183/51434/5885/286053/10460/9700/7517/990/10403/26271/55755/55055/8697/51529/9735/4085/81620/11130/9319/1062/1063/699/891/9212/9232/7272/11065
BP	GO:0002703	regulation of leukocyte mediated immunity	216	0.519529	2.67509	1e-10	2.71038e-09	1.58696e-09	5291	tags=52%, list=21%, signal=42%	339390/1776/11314/4092/11126/8809/912/1378/3162/3824/1604/2294/3554/7133/695/1398/975/84106/117157/114836/5880/7099/10666/3815/114548/3553/10125/3575/7305/7098/567/64581/3133/3822/4068/729230/6372/3125/10225/3594/8832/201294/7454/1178/2625/2268/7409/3823/6688/3821/640/91543/5336/3106/6504/684/3598/3136/722/11035/2213/3122/3134/3689/4067/84868/3569/3566/3565/5788/6778/604/3902/11006/3805/56940/108…
MF	GO:0004896	cytokine receptor activity	90	0.5922	2.67274	1e-10	2.71038e-09	1.58696e-09	4240	tags=48%, list=17%, signal=40%	3977/1230/2675/920/10148/3587/8809/2152/9173/3554/8807/10663/3459/3568/3575/1441/3560/960/729230/2057/1240/3572/2690/3594/7852/972/2322/3598/2674/3953/2833/3566/3455/3559/3556/9180/3593/10803/23765/3588/1236/1232/3454
CC	GO:0000776	kinetochore	111	-0.629707	-2.67132	1e-10	2.71038e-09	1.58696e-09	3162	tags=52%, list=13%, signal=46%	25942/10540/25936/23421/5501/7158/55839/222229/84516/23291/55746/3297/701/348995/8655/11243/1639/84295/55166/25909/5905/23468/7514/7756/9183/2491/57122/54821/79023/10403/79980/83540/79902/27085/10615/81930/55055/9793/9735/57405/4085/81620/11130/3619/64105/1062/79019/4751/147841/1063/11004/1058/699/891/9212/332/7272/55355
BP	GO:0002367	cytokine production involved in immune response	94	0.590037	2.67077	1e-10	2.71038e-09	1.58696e-09	3504	tags=49%, list=14%, signal=42%	4092/11126/8809/3162/11213/1604/3554/7133/695/975/7099/10666/3815/114548/3553/7043/7098/567/64581/3133/729230/10225/948/1178/9474/23411/2625/972/91543/5336/6504/684/3134/7805/3569/3565/604/11006/3805/10892/54210/7189/335/7124/284/3456
BP	GO:0030595	leukocyte chemotaxis	208	0.519171	2.66856	1e-10	2.71038e-09	1.58696e-09	3673	tags=40%, list=15%, signal=35%	6387/6368/3680/1230/6359/2358/1436/1910/9023/63940/6441/1511/6279/6283/6352/5641/5142/5880/199/1667/51119/728/6347/7057/6369/3815/3553/6366/6363/2207/5293/1441/719/5294/301/729230/2621/9353/3603/6372/1240/388372/1906/5764/7852/972/11151/7409/6280/2920/6688/414062/2841/59341/240/6504/796/58191/8600/4354/7424/3689/4067/3569/10451/83700/3565/3958/6349/6348/245937/6288/54210/57580/6850/2185/79890/636…
BP	GO:0060326	cell chemotaxis	273	0.501887	2.66396	1e-10	2.71038e-09	1.58696e-09	3673	tags=38%, list=15%, signal=33%	6387/6368/3680/1230/5156/6359/2358/9547/1436/1910/9023/63940/185/6441/1511/1398/3082/6279/1902/6283/6352/5641/5142/5880/199/10663/1667/51119/728/6347/7057/6369/3815/3553/6366/6363/2207/5293/1441/719/5294/301/729230/1969/2621/80310/9353/3603/6372/1240/388372/1906/5764/7852/972/11151/7409/6280/3164/2920/6688/414062/2841/59341/240/6504/796/58191/55742/8600/4354/7424/3689/64094/4067/7412/5588/3569/10…
BP	GO:0050900	leukocyte migration	345	0.488714	2.66285	1e-10	2.71038e-09	1.58696e-09	4911	tags=44%, list=20%, signal=36%	10894/1893/6387/6368/3680/11314/1230/1621/6359/64805/2358/1436/653/1910/9023/11117/3162/63940/6403/6441/5734/3554/1511/81704/10164/2534/1398/975/6279/6283/6352/5641/5142/5880/4615/199/1667/51119/728/6347/7057/6369/3815/3553/6366/6363/58494/2207/3055/5293/1441/6402/719/5294/301/2650/6793/2059/729230/2621/80310/9353/3603/6372/1240/388372/1906/5764/7852/6401/2625/972/7535/11151/7409/6280/961/2920/66…
BP	GO:0044784	metaphase/anaphase transition of cell cycle	61	-0.689455	-2.66146	1e-10	2.71038e-09	1.58696e-09	2695	tags=54%, list=11%, signal=48%	84861/348654/10459/701/64682/51433/7756/9183/51434/5885/286053/10460/9700/7517/990/10403/26271/55755/55055/8697/51529/9735/4085/81620/11130/9319/1062/1063/699/891/9212/7272/11065
BP	GO:0042129	regulation of T cell proliferation	161	0.543252	2.65825	1e-10	2.71038e-09	1.58696e-09	4880	tags=50%, list=19%, signal=40%	339390/11326/10288/10148/5621/912/1378/30835/6441/1604/7133/975/7048/942/6352/5880/199/26191/2615/3553/6363/301/79679/3133/729230/3572/10673/3594/80380/3717/1178/7535/11151/3600/6504/3115/923/916/384/3485/3113/160365/2056/959/11035/57045/7412/84868/5588/3569/3109/3565/3958/5788/3659/8379/11006/944/6850/7189/1051/941/3479/27242/3559/2064/3593/1947/57630/23308/3280/84433/10457/177/56253/383/3071/94…
BP	GO:0002699	positive regulation of immune effector process	223	0.513708	2.65692	1e-10	2.71038e-09	1.58696e-09	5090	tags=50%, list=20%, signal=40%	10584/11314/78989/8547/2220/5322/11126/8809/912/1378/3162/3824/1604/2294/3554/695/975/3142/942/2219/117157/114836/5880/7099/26191/10666/3815/114548/3553/6363/10125/7305/567/64581/301/3133/3822/4068/729230/3125/3594/948/8832/4153/201294/26057/5105/79132/55601/23411/2625/2268/972/7409/3823/6688/640/91543/5336/3106/6504/3598/3136/3122/3134/3689/7805/4067/3569/3109/3566/3565/51744/5788/6778/3902/3805…
BP	GO:0050766	positive regulation of phagocytosis	66	0.62757	2.65656	1e-10	2.71038e-09	1.58696e-09	3619	tags=48%, list=14%, signal=42%	10584/78989/8547/2220/5322/2358/6441/2219/10461/6347/3553/2207/3560/1794/64581/2621/948/4153/3600/961/5336/11031/1535/2213/140885/5788/6556/10326/335/7124/57118/566
BP	GO:0002695	negative regulation of leukocyte activation	169	0.534956	2.65627	1e-10	2.71038e-09	1.58696e-09	3504	tags=43%, list=14%, signal=37%	339390/11326/11314/6422/558/10288/8530/4092/5621/1378/3162/64092/6441/2294/1511/695/7940/3142/942/10875/10461/864/26191/2615/7305/301/79679/3398/729230/374403/23495/54900/80380/8832/2737/3635/2268/972/8993/6688/79626/640/472/10077/3598/135/384/2213/3134/10464/57045/7805/4067/84868/3566/3565/3958/5788/84695/604/3949/3659/8379/3902/11006/56940/1051/941/27242/3559/2064/3456
BP	GO:0030071	regulation of mitotic metaphase/anaphase transition	56	-0.700875	-2.65536	1e-10	2.71038e-09	1.58696e-09	2695	tags=55%, list=11%, signal=50%	84861/348654/10459/701/51433/7756/9183/51434/5885/286053/9700/7517/990/10403/26271/55755/55055/8697/51529/9735/4085/81620/11130/9319/1062/1063/699/891/9212/7272/11065
BP	GO:0051250	negative regulation of lymphocyte activation	143	0.543551	2.65469	1e-10	2.71038e-09	1.58696e-09	3504	tags=43%, list=14%, signal=38%	339390/11326/11314/6422/558/10288/4092/5621/1378/64092/6441/1511/695/7940/3142/942/10875/10461/864/26191/2615/7305/301/79679/3398/374403/23495/54900/80380/2737/3635/2268/972/8993/79626/640/472/135/384/2213/3134/10464/57045/7805/4067/84868/3566/3565/3958/84695/604/3659/8379/3902/11006/56940/1051/941/27242/3559/2064/3456
BP	GO:0002704	negative regulation of leukocyte mediated immunity	66	0.62671	2.65291	1e-10	2.71038e-09	1.58696e-09	4880	tags=56%, list=19%, signal=45%	339390/11314/4092/1378/3162/3824/1604/2294/1398/3575/3133/729230/10225/8832/6688/3821/3106/6504/684/3598/722/2213/3134/84868/5788/604/11006/3805/56940/3456/5272/5532/383/3071/409/27342/3965
BP	GO:0002696	positive regulation of leukocyte activation	319	0.492112	2.65244	1e-10	2.71038e-09	1.58696e-09	5135	tags=49%, list=20%, signal=40%	1949/90865/558/10288/920/10148/11126/912/9173/1378/30835/1604/81704/2534/695/3543/975/7048/3142/942/6352/4615/199/57817/864/6347/7099/26191/7057/10666/114548/3553/6366/6363/10125/3575/7305/567/64581/301/79679/3133/3822/729230/2621/3572/3125/10673/939/3594/80380/3717/2736/5105/596/2737/2625/3635/2268/972/7704/7535/952/1326/11151/7409/3600/961/120892/6504/3115/914/923/916/3485/3113/160365/8600/2056…
BP	GO:0051251	positive regulation of lymphocyte activation	278	0.497896	2.64567	1e-10	2.71038e-09	1.58696e-09	5135	tags=50%, list=20%, signal=40%	1949/558/10288/920/10148/11126/912/1378/30835/1604/81704/2534/695/3543/975/7048/3142/942/6352/4615/199/864/6347/7099/26191/114548/3553/6366/6363/10125/3575/7305/567/64581/301/79679/3133/3822/729230/2621/3572/3125/10673/939/3594/80380/3717/2736/5105/596/2737/2625/3635/972/7704/7535/952/1326/11151/7409/3600/961/6504/3115/923/916/3485/3113/160365/8600/2056/959/3122/3134/3111/3707/3117/4067/7412/8486…
BP	GO:0002429	immune response-activating cell surface receptor signaling pathway	202	0.519716	2.6378	1e-10	2.71038e-09	1.58696e-09	4732	tags=51%, list=19%, signal=42%	11314/2357/2358/11126/5621/11027/1378/3824/1997/2534/695/8631/3543/975/925/79037/5583/84106/2219/5142/2359/728/26191/919/10666/3702/5144/2207/3055/5293/719/7305/3937/64581/79679/7294/3822/4068/1240/3125/54900/50852/4153/596/2625/3635/89857/2268/7535/952/7409/9404/961/3823/640/5336/3115/5359/660/2213/56244/973/7805/84174/4067/3932/10451/115352/3958/5788/64005/11006/56940/114625/11118/4208/10892/68…
BP	GO:0002757	immune response-activating signal transduction	202	0.519716	2.6378	1e-10	2.71038e-09	1.58696e-09	4732	tags=51%, list=19%, signal=42%	11314/2357/2358/11126/5621/11027/1378/3824/1997/2534/695/8631/3543/975/925/79037/5583/84106/2219/5142/2359/728/26191/919/10666/3702/5144/2207/3055/5293/719/7305/3937/64581/79679/7294/3822/4068/1240/3125/54900/50852/4153/596/2625/3635/89857/2268/7535/952/7409/9404/961/3823/640/5336/3115/5359/660/2213/56244/973/7805/84174/4067/3932/10451/115352/3958/5788/64005/11006/56940/114625/11118/4208/10892/68…
BP	GO:0046631	alpha-beta T cell activation	144	0.540612	2.63727	1e-10	2.71038e-09	1.58696e-09	3128	tags=44%, list=12%, signal=39%	11314/10148/4092/11126/8809/1604/5734/8320/975/7048/3142/942/114836/864/26191/639/3702/114548/6363/1794/4818/6774/301/3133/729230/4063/3125/3594/3717/6095/596/3662/2737/2625/7704/7535/3600/91543/2841/135/916/384/50856/3122/64919/3707/57045/10538/6146/5588/3569/64218/3566/3565/5788/84695/6778/604/3659/11006/10892/944/6850/941
BP	GO:0033045	regulation of sister chromatid segregation	66	-0.669332	-2.63596	1e-10	2.71038e-09	1.58696e-09	1528	tags=52%, list=6%, signal=49%	84861/348654/10459/701/64682/51433/7756/9183/51434/5885/286053/10460/9700/7517/990/10403/26271/55755/55055/8697/51529/9735/4085/81620/11130/9319/1062/1063/699/891/9212/9232/7272/11065
BP	GO:0051249	regulation of lymphocyte activation	416	0.47915	2.63271	1e-10	2.71038e-09	1.58696e-09	4783	tags=44%, list=19%, signal=37%	339390/11326/11314/6422/1949/558/10288/920/10148/4092/11126/5621/912/1378/30835/64092/6441/1604/1511/81704/2534/7133/695/7940/3543/975/7048/3142/942/6352/677/10875/5880/4615/199/10461/864/6347/7099/26191/639/2615/114548/3553/6366/6363/10125/3575/7305/567/678/64581/301/79679/3133/3398/3822/729230/2621/374403/23495/3572/3125/10673/939/54900/3594/80380/3717/2736/1178/5105/596/3662/2737/2625/3635/226…
BP	GO:0050729	positive regulation of inflammatory response	127	0.550297	2.62818	1e-10	2.71038e-09	1.58696e-09	4465	tags=46%, list=18%, signal=38%	5138/90865/353514/5743/9173/63940/185/5734/695/2113/975/7132/6279/6283/4889/7099/6369/3553/81030/834/7098/4818/5294/3133/729230/2167/3603/3572/7097/3717/6622/3600/6280/961/120892/5336/59341/241/8600/8692/3569/3949/6348/1051/5320/245928/54106/9180/7124/3593/23765/4814/1236/351/1075/4258/4317/8723
BP	GO:0032609	interferon-gamma production	107	0.563699	2.62418	1e-10	2.71038e-09	1.58696e-09	3421	tags=45%, list=14%, signal=39%	558/10148/11126/8809/5621/9173/1378/3554/114836/5142/7099/26191/929/10666/3553/10125/5144/7098/64581/9971/7294/729230/2621/3394/51311/10225/3594/80380/3717/2625/8993/961/6504/3115/914/916/3113/11035/7805/84868/140885/51744/11006/11118/6556/54106/7124/3593
BP	GO:0032649	regulation of interferon-gamma production	107	0.563699	2.62418	1e-10	2.71038e-09	1.58696e-09	3421	tags=45%, list=14%, signal=39%	558/10148/11126/8809/5621/9173/1378/3554/114836/5142/7099/26191/929/10666/3553/10125/5144/7098/64581/9971/7294/729230/2621/3394/51311/10225/3594/80380/3717/2625/8993/961/6504/3115/914/916/3113/11035/7805/84868/140885/51744/11006/11118/6556/54106/7124/3593
BP	GO:0002456	T cell mediated immunity	106	0.564345	2.61881	1e-10	2.71038e-09	1.58696e-09	4774	tags=50%, list=19%, signal=41%	339390/4092/8809/912/3824/1604/3554/7133/5551/975/925/114548/3553/3575/567/3133/729230/3125/3594/7454/1178/2625/3821/91543/3106/6504/3136/11035/2213/3122/3134/3569/3565/5788/64005/11006/56940/11118/10892/8417/7189/3004/3593/3456/563/911/10384/1075/5532/177/383/3071/326
CC	GO:0034708	methyltransferase complex	73	-0.651868	-2.61632	1e-10	2.71038e-09	1.58696e-09	3921	tags=53%, list=16%, signal=45%	6878/79872/10856/6634/11108/29104/8731/30827/54881/54554/84661/57680/6636/9739/4234/26121/10419/81887/29890/4221/11091/23468/79084/6874/6633/5929/1876/56339/3054/6628/6635/8607/10785/23054/10445/23512/6637/22976/2146
BP	GO:0001909	leukocyte mediated cytotoxicity	117	0.553544	2.61402	1e-10	2.71038e-09	1.58696e-09	4880	tags=52%, list=19%, signal=42%	1776/11126/912/3824/1511/1398/5551/114836/4615/10666/10125/3002/3575/7305/567/4818/3133/3822/4068/6372/3594/201294/11151/7409/3823/6688/3821/3106/3136/11035/2213/3122/3134/84868/5788/3902/3805/54210/8417/3811/259197/3004/55207/9437/3593/3684/563/566/911/5272/1075/57823/5532/177/2209/56253/383/3071/409/6777/3965
BP	GO:0001818	negative regulation of cytokine production	238	0.499741	2.61206	1e-10	2.71038e-09	1.58696e-09	5212	tags=51%, list=21%, signal=41%	11326/353514/558/4092/5621/9173/1378/5552/3162/945/11213/6441/5734/695/9314/57447/3082/7538/10365/59307/10461/7099/26191/7057/28951/2615/114548/7043/7305/2950/301/9971/2627/28514/1969/199713/2621/1240/51311/5966/10225/80380/8832/79132/2625/3635/54941/8993/25987/23405/2841/6504/684/5443/384/50856/113/4938/2213/3134/10464/57045/7481/7805/408/84868/3569/140885/27020/3565/307/5788/1540/604/3902/11006…
BP	GO:1902099	regulation of metaphase/anaphase transition of cell cycle	59	-0.68157	-2.60307	1e-10	2.71038e-09	1.58696e-09	951	tags=53%, list=4%, signal=51%	84861/348654/10459/701/51433/7756/9183/51434/5885/286053/9700/7517/990/10403/26271/55755/55055/8697/51529/9735/4085/81620/11130/9319/1062/1063/699/891/9212/7272/11065
BP	GO:0032602	chemokine production	87	0.577159	2.60254	1e-10	2.71038e-09	1.58696e-09	4408	tags=53%, list=18%, signal=44%	90865/1436/9173/3162/9314/4615/199/59307/7099/1654/3553/7098/2950/64581/3091/9971/1969/116/6372/7097/8832/972/59341/384/4938/84868/3569/140885/1958/3566/11006/4155/245937/6591/54210/347/6850/54106/7124/3574/566/23765/64170/351/177/255231
BP	GO:0070374	positive regulation of ERK1 and ERK2 cascade	186	0.517556	2.60206	1e-10	2.71038e-09	1.58696e-09	4880	tags=47%, list=19%, signal=38%	8685/6368/7010/1230/5156/6359/920/5322/9464/10253/2358/1436/10268/6352/148/4889/3357/8074/728/6347/7099/26191/6369/387129/6366/6363/10125/56034/960/10979/116/2621/80310/26281/388372/948/5609/8837/972/2149/414062/5728/59341/6504/3084/8600/5031/2056/255743/3725/408/84868/5151/27020/151306/5788/6349/8829/6348/168667/55294/5604/2185/2255/3479/5320/7124/6362/284/6357/2771/2244/11331/64170/1236/1139/35…
BP	GO:0006281	DNA repair	408	-0.525578	-2.60085	1e-10	2.71038e-09	1.58696e-09	5384	tags=49%, list=21%, signal=39%	8243/25836/22944/2175/10973/56852/2138/5438/4437/79184/23503/7319/3148/84083/2547/10111/5884/2140/5426/51720/2072/84164/56154/25913/9937/8091/7486/64110/4292/51750/10213/1642/51343/55929/571/80198/27030/10856/1069/1763/51368/7913/11200/23244/5429/55120/29072/54840/10075/2969/51366/27434/9025/55339/4798/60/5111/348654/6749/54799/91875/8450/63901/7374/29844/64421/79913/6119/7156/5982/7158/84501/739…
BP	GO:0070555	response to interleukin-1	129	0.5443	2.59963	1e-10	2.71038e-09	1.58696e-09	4311	tags=49%, list=17%, signal=41%	6368/6422/6359/5740/11213/3554/6352/4615/10365/6347/6369/4609/3553/6366/6363/81030/820/301/3091/199713/2690/388372/1906/4824/5105/6095/6401/6622/3476/952/4313/961/8564/414062/1535/2056/8692/3569/140885/1958/6349/6348/4524/7189/1051/6609/4790/3037/9252/6362/9100/7528/6357/3557/2244/2635/2729/3551/351/3280/10010/9590/6360
MF	GO:0017116	single-stranded DNA helicase activity	20	-0.865611	-2.59794	1e-10	2.71038e-09	1.58696e-09	2209	tags=85%, list=9%, signal=78%	5982/79075/84515/56897/5985/1660/4174/63922/5983/4175/80119/4172/5984/4173/4176/4171/10721
BP	GO:1905818	regulation of chromosome separation	67	-0.657717	-2.59692	1e-10	2.71038e-09	1.58696e-09	2695	tags=52%, list=11%, signal=47%	84861/348654/10459/1457/701/64682/51433/7756/9183/51434/5885/286053/10460/9700/7517/990/10403/26271/55755/55055/8697/51529/9735/4085/81620/11130/9319/1062/1063/699/891/9212/9232/7272/11065
BP	GO:1903557	positive regulation of tumor necrosis factor superfamily cytokine production	99	0.564763	2.59524	1e-10	2.71038e-09	1.58696e-09	4447	tags=52%, list=18%, signal=43%	90865/353514/11027/942/4615/7099/7057/929/3459/1536/6363/4939/10125/7305/7098/7096/6774/64581/3133/729230/7097/948/8832/3717/64135/120892/5336/1191/914/23643/1535/4938/84868/5295/3569/5788/6348/114900/6850/2048/54106/5663/3593/5724/566/64170/351/943/9590/177/4317
BP	GO:0140014	mitotic nuclear division	247	-0.551907	-2.59503	1e-10	2.71038e-09	1.58696e-09	3514	tags=43%, list=14%, signal=37%	10201/23212/255324/11200/81929/23244/2801/27175/10540/25936/1761/23310/3304/23636/4733/84861/8815/348654/90990/7329/27127/10726/10300/10459/27436/1104/79075/10419/701/3796/9820/64682/51547/9031/23126/9088/3209/51433/7756/9183/51434/5885/84722/10274/286053/9371/10460/9700/7517/990/146909/29781/10403/79980/83540/27085/995/26271/10615/81930/9918/10592/55755/55055/8697/51529/9735/4085/54892/1111/8034…
BP	GO:0032611	interleukin-1 beta production	83	0.582367	2.59346	1e-10	2.71038e-09	1.58696e-09	5179	tags=57%, list=21%, signal=45%	353514/11027/945/4615/7099/114548/6363/3428/834/7305/149628/2950/6774/64581/199713/51311/948/3717/2149/58484/384/115362/3569/140885/1958/6348/11006/54206/10892/9447/3479/10333/335/7124/24145/566/55655/1236/1992/351/177/3098/4332/409/3965/51738/91662
BP	GO:0032651	regulation of interleukin-1 beta production	83	0.582367	2.59346	1e-10	2.71038e-09	1.58696e-09	5179	tags=57%, list=21%, signal=45%	353514/11027/945/4615/7099/114548/6363/3428/834/7305/149628/2950/6774/64581/199713/51311/948/3717/2149/58484/384/115362/3569/140885/1958/6348/11006/54206/10892/9447/3479/10333/335/7124/24145/566/55655/1236/1992/351/177/3098/4332/409/3965/51738/91662
BP	GO:0050764	regulation of phagocytosis	91	0.574899	2.59197	1e-10	2.71038e-09	1.58696e-09	3619	tags=45%, list=14%, signal=39%	10584/11314/78989/8547/2220/5322/2358/6441/2219/10461/6347/3553/2207/3055/3560/1794/64581/2621/7097/948/4153/9474/2268/3600/961/5336/11031/5359/8291/1535/2213/140885/5788/6850/6556/10326/335/7124/1265/57118/566
BP	GO:0042116	macrophage activation	95	0.567012	2.59087	1e-10	2.71038e-09	1.58696e-09	4766	tags=58%, list=19%, signal=47%	11326/90865/8530/2358/9173/712/199/57817/23729/728/7099/7057/3459/7305/7098/7096/7097/8832/3717/6095/972/6622/120892/9867/7107/5336/472/1191/8291/2213/3689/3725/84868/3569/3566/3565/5788/3949/6348/6850/6556/10333/22904/7124/3684/566/351/1075/177/23208/4317/3596/22918/3727/1437
BP	GO:0032642	regulation of chemokine production	86	0.574154	2.58813	1e-10	2.71038e-09	1.58696e-09	4408	tags=52%, list=18%, signal=43%	90865/1436/9173/3162/9314/4615/199/59307/7099/1654/3553/7098/2950/64581/3091/9971/1969/116/6372/7097/8832/972/59341/384/4938/84868/3569/140885/1958/3566/11006/4155/245937/6591/347/6850/54106/7124/3574/566/23765/64170/351/177/255231
BP	GO:0002764	immune response-regulating signaling pathway	361	0.474173	2.58775	1e-10	2.71038e-09	1.58696e-09	4890	tags=46%, list=19%, signal=38%	11314/10288/2357/2358/11126/5621/11027/1378/3824/945/1997/11213/2534/695/8631/3543/975/925/79037/5583/84106/84282/2219/5142/4615/2359/2099/728/1520/7099/26191/919/1654/929/10666/3702/5602/3815/5144/2207/3055/5293/719/7305/7098/7096/3937/64581/79679/9971/7294/3822/4068/1240/7097/3125/54900/51311/50852/948/4153/26057/5609/596/79132/55601/3662/2625/3635/89857/2268/57142/64135/7535/54941/952/7409/940…
BP	GO:0032760	positive regulation of tumor necrosis factor production	95	0.566026	2.58636	1e-10	2.71038e-09	1.58696e-09	4447	tags=53%, list=18%, signal=43%	90865/353514/11027/4615/7099/7057/929/3459/1536/6363/4939/10125/7305/7098/7096/6774/64581/3133/729230/7097/948/8832/3717/64135/120892/5336/1191/914/23643/1535/4938/84868/5295/3569/5788/6348/114900/6850/2048/54106/5663/3593/5724/566/64170/351/943/9590/177/4317
CC	GO:0000228	nuclear chromosome	162	-0.576612	-2.58545	1e-10	2.71038e-09	1.58696e-09	2544	tags=42%, list=10%, signal=38%	5111/57649/7329/29844/83637/27127/55193/79913/6119/222229/3065/1104/50485/1457/10902/54962/51547/10714/11052/86/11073/11169/9031/51377/29893/25855/5883/10128/84296/6598/5885/65083/79595/54108/8607/5422/55388/1660/4174/51659/63979/5557/8295/64785/10445/5424/9918/4175/10592/672/54107/5427/6839/23649/1111/8805/3619/4172/4173/7283/4751/641/4176/4171/8914/29803/332/7153
BP	GO:0009063	cellular amino acid catabolic process	100	0.562401	2.58503	1e-10	2.71038e-09	1.58696e-09	5084	tags=61%, list=20%, signal=49%	4846/51166/443/51380/3242/4942/4329/54511/3067/6999/10157/594/3176/2954/8564/27165/6898/64577/384/3155/3712/4143/1036/549/6470/5860/2746/137872/2875/144193/18/2752/593/84706/51268/10841/875/64902/2805/2653/8942/10993/131669/11112/58510/38/26275/1629/5053/7915/8659/3034/2184/1743/36/383/1757/55556/5009/27034/2108
BP	GO:0043299	leukocyte degranulation	72	0.602893	2.58474	1e-10	2.71038e-09	1.58696e-09	4962	tags=61%, list=20%, signal=49%	11314/3162/2294/695/84106/5880/3815/10125/3055/5293/6844/4818/5294/3822/729230/8832/201294/5729/2268/11151/6688/5730/640/3598/8773/2213/3134/306/3689/4067/3566/3565/6348/6850/3684/6814/5724/2242/8723/3596/3071/27342/3965/9846
BP	GO:0007596	blood coagulation	207	0.503612	2.58465	1e-10	2.71038e-09	1.58696e-09	3488	tags=38%, list=14%, signal=33%	5156/114897/558/6915/64805/11093/22915/2152/7980/3043/6403/1511/7056/710/4780/9060/10461/4846/7099/7057/10855/3083/375033/2207/5627/5294/7294/5023/2621/8529/3572/5051/11234/653145/948/2160/1906/3717/7454/5341/2158/7409/2149/640/2159/5336/10077/135/5327/5359/10544/959/7450/10672/4067/5588/3569/3932/10451/8858/1606/83706/2157/18/50808/10398/6288/5340/3818/6850/10019/2048/221037/2811/3690/1361/151/3…
CC	GO:0005657	replication fork	49	-0.697061	-2.58227	1e-10	2.71038e-09	1.58696e-09	4136	tags=69%, list=16%, signal=58%	7486/5558/55929/51368/5429/5111/83637/6119/5982/7158/50485/5981/54962/10714/11169/9031/5889/5422/55388/7517/5985/5557/1786/29980/5424/5983/80119/23649/29128/1111/4172/5984/641/8914
BP	GO:0000280	nuclear division	362	-0.527737	-2.58149	1e-10	2.71038e-09	1.58696e-09	3922	tags=41%, list=16%, signal=35%	4292/79643/7474/55125/51343/5902/23236/8658/80198/27030/10201/23212/255324/11200/81929/23244/5719/2801/225689/27175/10540/25936/1761/23310/3304/23636/4733/84861/8815/348654/90990/7329/55124/27127/10726/84501/10300/10459/10919/27436/1104/79075/79703/10419/701/3796/9820/64682/51547/83990/7589/29988/116138/9031/29893/23126/5889/9088/11077/84930/3209/51433/7756/9183/51434/5885/84722/10274/286053/8438…
BP	GO:0050851	antigen receptor-mediated signaling pathway	152	0.526528	2.57731	1e-10	2.71038e-09	1.58696e-09	4332	tags=49%, list=17%, signal=41%	11314/11126/5621/1997/2534/695/8631/3543/975/925/79037/5583/84106/5142/26191/919/10666/3702/5144/5293/3937/79679/7294/4068/3125/54900/50852/596/2625/3635/89857/7535/952/9404/640/5336/3115/660/2213/56244/973/7805/84174/4067/3932/10451/115352/3958/5788/11006/56940/114625/11118/4208/10892/6850/7189/974/27242/5663/3119/10384/153579/23308/84807/4340/1236/54923/11119/53347/3551/84433/59338/23149
BP	GO:0033044	regulation of chromosome organization	178	-0.567671	-2.57589	1e-10	2.71038e-09	1.58696e-09	4302	tags=48%, list=17%, signal=40%	6742/10694/25913/65057/26272/6714/51750/8658/10856/10664/25942/225689/4798/10574/84861/348654/8550/29844/79913/10576/10459/4216/55226/1017/22948/701/51535/908/10155/64682/1736/86/9031/10575/51377/7515/51433/7756/9183/51434/54552/5885/1663/286053/22880/8607/10460/9700/7517/990/10403/23381/1786/10445/26271/9869/9918/10592/55755/55055/8697/80119/51529/142/9735/4085/7203/81620/11130/9319/2237/1062/47…
BP	GO:0071347	cellular response to interleukin-1	103	0.557708	2.57499	1e-10	2.71038e-09	1.58696e-09	4311	tags=50%, list=17%, signal=41%	6368/6422/6359/5740/11213/3554/6352/4615/10365/6347/6369/4609/3553/6366/6363/81030/820/3091/199713/388372/1906/4824/5105/6095/4313/961/8564/414062/8692/3569/140885/1958/6349/6348/7189/1051/4790/3037/9252/6362/9100/7528/6357/3557/2244/2635/3551/3280/10010/9590/6360
BP	GO:0051304	chromosome separation	86	-0.627446	-2.57354	1e-10	2.71038e-09	1.58696e-09	2695	tags=48%, list=11%, signal=43%	84861/348654/7156/10459/1457/701/64682/9400/51433/7756/9183/51434/5885/286053/10460/9700/7517/990/29781/10403/146956/26271/80010/55755/55055/8697/51529/9735/4085/81620/11130/9319/1062/1063/699/891/9212/9232/7272/11065/7153
BP	GO:0006302	double-strand break repair	200	-0.558742	-2.57233	1e-10	2.71038e-09	1.58696e-09	4540	tags=48%, list=18%, signal=40%	2140/51720/2072/56154/25913/9937/8091/7486/64110/4292/51750/10213/55929/80198/10856/1763/7913/11200/29072/54840/51366/27434/9025/60/348654/54799/64421/79913/6119/7156/7158/84501/10459/27339/4968/50485/65123/51588/10902/84515/3297/4436/51547/83990/7415/86/9400/79728/10038/23126/5889/7515/1653/2187/11077/1161/5932/8317/84296/5885/1663/286053/8438/8607/55159/5422/7517/4174/51659/63979/56893/8295/146…
BP	GO:0007599	hemostasis	213	0.497939	2.56405	1e-10	2.71038e-09	1.58696e-09	4298	tags=41%, list=17%, signal=35%	5156/114897/558/6915/64805/11093/22915/2152/7980/3043/6403/1511/7056/710/4780/9060/10461/4846/7099/7057/10855/3083/4778/375033/2207/5627/5294/7294/5023/2621/8529/3572/5051/11234/653145/948/2160/1906/3717/7454/5341/2158/7409/2149/640/2159/5336/10077/135/5327/5359/10544/959/7450/10672/4067/5588/3569/3932/10451/8858/1606/83706/2157/18/50808/10398/6288/5340/3818/6850/10019/2048/221037/2811/3690/1361/…
BP	GO:0051983	regulation of chromosome segregation	81	-0.628787	-2.56293	1e-10	2.71038e-09	1.58696e-09	2088	tags=48%, list=8%, signal=44%	84861/348654/10459/55920/1457/701/64682/51433/7756/9183/51434/5885/286053/10460/9700/7517/990/10403/26271/55755/55055/8697/51529/9735/4085/81620/11130/9319/4288/157313/1062/1063/11004/699/891/9212/9232/7272/11065
BP	GO:0001906	cell killing	164	0.519019	2.55447	1e-10	2.71038e-09	1.58696e-09	4890	tags=48%, list=19%, signal=39%	1776/922/11126/912/3824/1604/1511/1398/5551/6283/1668/114836/4615/57817/1667/10666/735/10125/3002/3575/7305/567/4818/64581/3133/3822/4068/6372/3594/201294/8993/11151/7409/3823/6688/3821/3106/3136/11035/2213/3122/3134/84868/3565/1669/5788/3902/3075/3805/54210/8417/6850/3811/259197/3004/55207/9437/3593/3684/6357/563/566/911/4589/5272/1075/57823/5532/177/2209/56253/383/3596/3071/409/6777/3965/4057
BP	GO:0050817	coagulation	211	0.500129	2.55435	1e-10	2.71038e-09	1.58696e-09	3488	tags=38%, list=14%, signal=33%	5156/114897/558/6915/64805/11093/22915/2152/7980/3043/6403/1511/7056/710/4780/9060/10461/4846/7099/7057/10855/3083/375033/2207/5627/5294/7294/5023/2621/8529/3572/5051/11234/653145/948/2160/1906/3717/7454/5341/2158/7409/2149/640/2159/5336/10077/135/5327/5359/10544/959/7450/10672/4067/5588/3569/3932/10451/8858/1606/83706/2157/18/50808/10398/6288/5340/3818/6850/10019/2048/221037/2811/3690/1361/151/3…
BP	GO:0071216	cellular response to biotic stimulus	218	0.494386	2.55333	1e-10	2.71038e-09	1.58696e-09	3704	tags=40%, list=15%, signal=34%	558/654/10288/6915/11093/1910/11027/1604/1511/7133/695/7538/942/6352/9450/1668/5142/4615/59307/57817/1667/4846/23729/6347/7099/26191/57088/929/114548/3553/3055/10628/834/7096/2950/820/64581/9971/199713/6372/7097/23641/3394/948/80380/3717/57048/968/7431/2920/6688/8564/5336/445/23643/923/22933/2213/9451/23328/4067/84868/3569/140885/207/1669/6348/4064/245937/4208/10892/6850/7189/1051/2048/4790/51510…
MF	GO:0140097	catalytic activity, acting on DNA	190	-0.559202	-2.54999	1e-10	2.71038e-09	1.58696e-09	4870	tags=51%, list=19%, signal=41%	84083/2547/10111/5884/165545/5426/2072/9937/8091/7486/2186/51750/7015/80198/10856/1763/5429/116447/54840/27434/29104/6832/5111/348654/7374/64421/7156/5982/23583/57680/4968/79075/50485/1108/84515/4595/1773/5981/4436/6996/121642/2956/1736/83990/10714/56897/27301/64863/328/9400/5889/7515/1653/3978/54784/5883/5932/2071/1663/8438/6597/54108/8607/8458/5422/7517/5985/54821/1660/4174/9557/8940/55247/1789…
BP	GO:0045785	positive regulation of cell adhesion	417	0.463406	2.54592	1e-10	2.71038e-09	1.58696e-09	5040	tags=45%, list=20%, signal=36%	6387/6422/1949/7010/10288/920/64805/10148/4092/22915/11126/912/11117/1378/30835/288/6403/4651/1604/2294/1511/81704/10164/2534/2113/1398/8631/975/7048/3142/942/1842/6352/199/864/6347/26191/114548/3553/6366/6363/10125/3575/567/4739/301/79679/960/3133/59339/10979/729230/30008/3572/3125/10673/939/54453/8646/3594/10370/948/80380/9806/3717/25890/201294/2736/10272/5105/6401/2737/2625/91663/972/7704/7535…
BP	GO:0097530	granulocyte migration	139	0.523824	2.54563	1e-10	2.71038e-09	1.58696e-09	3663	tags=40%, list=15%, signal=35%	6368/3680/11314/6359/1436/5734/3554/6279/6283/6352/5142/5880/4615/728/6347/7057/6369/3553/6366/6363/2207/5293/1441/719/5294/301/9353/6372/1240/388372/1906/972/7409/6280/2920/414062/59341/6504/4354/3689/5175/10451/83700/3565/3958/6349/6348/6288/54210/57580/6850/391/6362/57118/6357/23765
BP	GO:0001819	positive regulation of cytokine production	430	0.458476	2.54246	1e-10	2.71038e-09	1.58696e-09	3688	tags=38%, list=15%, signal=33%	2658/90865/353514/10288/920/10148/11126/8809/1436/5743/2152/9173/11027/3162/63940/147372/11213/1604/5734/3554/975/3082/942/84282/2219/3357/114836/5142/4615/199/728/7099/26191/7057/1654/10855/929/3459/10666/3702/3815/114548/3553/1536/6363/4939/10125/5144/2207/3428/5293/834/283420/719/7305/7098/7096/567/149628/6774/64581/5294/301/79679/3091/9971/2627/3133/7294/729230/4063/4060/116/3603/3572/7097/33…
BP	GO:0002819	regulation of adaptive immune response	175	0.509527	2.53943	1e-10	2.71038e-09	1.58696e-09	3997	tags=43%, list=16%, signal=37%	339390/920/4092/11126/8809/912/9173/1378/3824/64092/1604/3554/7133/695/8631/975/962/3142/10666/114548/3553/6363/3575/567/64581/301/3133/729230/3572/3125/10673/3594/7454/1178/23411/2625/3821/91543/3106/6504/3665/3136/113/722/11035/2213/3122/3134/84868/5588/3569/3566/3565/5788/84695/6778/604/3659/11006/56940/4208/10892/8417/7189/2048/6556/941/3263/7124/3593/3456/563/911/64170/79915/84807
BP	GO:0032635	interleukin-6 production	131	0.527986	2.53726	1e-10	2.71038e-09	1.58696e-09	5212	tags=52%, list=21%, signal=41%	90865/353514/10288/11027/11213/3082/4615/199/10365/7099/26191/3553/7305/7098/7096/6774/64581/9971/2621/3603/7097/51311/948/8832/3635/972/64135/961/2149/5336/3106/59341/6504/5450/1535/5452/408/84868/8692/3569/140885/11006/114900/4155/6850/7189/1051/10333/3556/54106/7124/5724/23765/64170/351/84632/177/23208/4317/131450/79671/3071/409/27342/3965/51738/91662/55024
BP	GO:0032675	regulation of interleukin-6 production	131	0.527986	2.53726	1e-10	2.71038e-09	1.58696e-09	5212	tags=52%, list=21%, signal=41%	90865/353514/10288/11027/11213/3082/4615/199/10365/7099/26191/3553/7305/7098/7096/6774/64581/9971/2621/3603/7097/51311/948/8832/3635/972/64135/961/2149/5336/3106/59341/6504/5450/1535/5452/408/84868/8692/3569/140885/11006/114900/4155/6850/7189/1051/10333/3556/54106/7124/5724/23765/64170/351/84632/177/23208/4317/131450/79671/3071/409/27342/3965/51738/91662/55024
BP	GO:0032103	positive regulation of response to external stimulus	392	0.460794	2.5331	1e-10	2.71038e-09	1.58696e-09	4772	tags=42%, list=19%, signal=35%	5138/6387/4908/1230/90865/353514/654/64805/5322/2358/11126/1436/5743/2152/912/9173/11027/11117/63940/185/3824/5734/2534/695/2113/7056/975/7132/6279/6283/2219/6352/5641/4889/9450/117157/114836/5880/199/659/728/7099/7057/6369/10666/3553/6366/6363/10125/3055/81030/3428/834/719/7305/7098/81565/149628/4818/64581/5294/3133/7294/3822/4068/729230/2621/80310/2167/9353/3603/1240/3572/7097/51311/1906/3717/4…
BP	GO:0071621	granulocyte chemotaxis	114	0.538865	2.53147	1e-10	2.71038e-09	1.58696e-09	3663	tags=44%, list=15%, signal=38%	6368/3680/6359/1436/6279/6283/6352/5142/5880/728/6347/7057/6369/3553/6366/6363/2207/5293/1441/719/5294/301/9353/6372/1240/388372/1906/972/7409/6280/2920/414062/59341/6504/4354/3689/10451/83700/3565/3958/6349/6348/6288/54210/57580/6850/6362/57118/6357/23765
BP	GO:0000724	double-strand break repair via homologous recombination	112	-0.595802	-2.53106	1e-10	2.71038e-09	1.58696e-09	4434	tags=53%, list=18%, signal=44%	2072/56154/7486/64110/51750/10213/55929/80198/10856/29072/60/348654/54799/6119/7156/7158/10459/65123/10902/84515/86/9400/79728/23126/5889/7515/2187/5932/8317/84296/5885/286053/8438/8607/55159/7517/4174/51659/63979/56893/8295/3980/80010/4175/672/6944/25788/9401/142/1111/4172/2237/10635/4173/641/4176/4171/8914/10721
BP	GO:0000725	recombinational repair	112	-0.595802	-2.53106	1e-10	2.71038e-09	1.58696e-09	4434	tags=53%, list=18%, signal=44%	2072/56154/7486/64110/51750/10213/55929/80198/10856/29072/60/348654/54799/6119/7156/7158/10459/65123/10902/84515/86/9400/79728/23126/5889/7515/2187/5932/8317/84296/5885/286053/8438/8607/55159/7517/4174/51659/63979/56893/8295/3980/80010/4175/672/6944/25788/9401/142/1111/4172/2237/10635/4173/641/4176/4171/8914/10721
BP	GO:0002706	regulation of lymphocyte mediated immunity	160	0.513866	2.52996	1e-10	2.71038e-09	1.58696e-09	5291	tags=51%, list=21%, signal=40%	339390/4092/11126/8809/912/1378/3824/1604/3554/7133/695/1398/975/117157/114836/10666/114548/3553/10125/3575/567/3133/3822/4068/729230/3125/10225/3594/7454/1178/2625/7409/3823/3821/91543/3106/6504/3136/722/11035/2213/3122/3134/84868/3569/3565/5788/6778/604/3902/11006/3805/56940/10892/8417/7189/3263/259197/7124/9437/3593/3456/563/911/79915/5272/5532/177/56253/383/3071/940/121260/409/6777/3965/54440…
BP	GO:0046634	regulation of alpha-beta T cell activation	97	0.550979	2.52929	1e-10	2.71038e-09	1.58696e-09	3128	tags=43%, list=12%, signal=38%	11314/10148/4092/11126/1604/975/7048/3142/942/864/26191/639/114548/6363/301/3133/729230/3125/3594/3717/3662/2737/2625/7704/7535/135/916/384/3122/3707/57045/5588/3566/3565/5788/84695/604/3659/11006/10892/6850/941
BP	GO:0090329	regulation of DNA-templated DNA replication	43	-0.704558	-2.51698	1e-10	2.71038e-09	1.58696e-09	2544	tags=65%, list=10%, signal=59%	5111/59343/5982/51053/79075/50485/1017/54962/10269/56897/64863/79733/8317/84296/30968/5985/51659/29980/64785/3980/26271/63922/5983/144455/81620/5984/641/8914
BP	GO:0030593	neutrophil chemotaxis	95	0.549814	2.51229	1e-10	2.71038e-09	1.58696e-09	3613	tags=44%, list=14%, signal=38%	6368/3680/6359/6279/6283/6352/5142/5880/728/6347/6369/3553/6366/6363/2207/5293/1441/719/5294/9353/6372/388372/1906/972/7409/6280/2920/414062/4354/3689/10451/83700/3958/6349/6348/6288/54210/57580/6850/6362/57118/6357
MF	GO:0140640	catalytic activity, acting on a nucleic acid	448	-0.503758	-2.50739	1e-10	2.71038e-09	1.58696e-09	4870	tags=46%, list=19%, signal=37%	84083/24140/2547/10436/10111/10056/5884/165545/285605/5426/10799/2072/55621/8653/23019/23210/10622/9937/8091/7486/25885/10667/55687/2186/51750/9879/4343/1656/7015/83707/5441/22803/80198/10856/1763/9931/29081/5429/116447/51651/387338/54840/9836/6499/283459/63899/27434/56931/54901/80746/339175/9775/29104/55798/115752/11128/51728/4848/6832/5111/90957/56257/348654/8731/56915/11056/51010/10940/1662/55…
BP	GO:0006310	DNA recombination	232	-0.536374	-2.50664	1e-10	2.71038e-09	1.58696e-09	4434	tags=44%, list=18%, signal=36%	2072/56159/51002/56154/7486/64110/4292/51750/10213/55929/80198/27030/10856/29072/27434/9025/4798/60/6832/6830/348654/54799/51010/7374/29844/64421/79913/6119/7156/7158/9984/10459/7037/65123/10902/84515/79703/3329/4436/6929/2956/83990/27301/328/86/9400/116138/79728/51377/29893/23126/5889/7515/2187/11077/7292/5932/8317/84296/5885/286053/8438/8607/55159/7517/4174/51659/63979/4841/84057/4439/56893/829…
BP	GO:0071674	mononuclear cell migration	177	0.499895	2.50503	1e-10	2.71038e-09	1.58696e-09	4452	tags=44%, list=18%, signal=36%	1893/6387/6368/1230/6359/2358/1436/653/9023/1511/81704/1398/6283/6352/5641/199/1667/728/6347/7057/6369/6366/6363/58494/5293/719/5294/301/6793/2059/729230/2621/80310/9353/1240/388372/7852/2625/7535/961/6688/414062/59341/240/6504/796/58191/8600/11035/4067/5175/3569/140885/207/3565/3958/6349/6348/64005/245937/6288/5340/347/3676/2185/7124/6362/1843/6357/4681/1236/351/6558/6360/177/387695/131450
BP	GO:0050727	regulation of inflammatory response	318	0.464461	2.50476	1e-10	2.71038e-09	1.58696e-09	3421	tags=36%, list=14%, signal=31%	5138/1776/7010/90865/353514/8530/2358/5743/9173/1910/284207/63940/185/5740/5734/2294/3554/2534/7133/695/2113/9314/975/3082/7132/313/7538/6279/9021/6283/6352/4889/4615/2099/57817/23729/1003/7099/6369/114548/3553/3055/81030/834/653361/7098/4818/2950/5294/301/80709/9971/89790/3133/729230/2167/3603/3572/7097/58189/3717/64838/6095/6401/2625/2268/6622/8993/3600/6280/961/120892/79626/5336/59341/240/472/…
BP	GO:0007052	mitotic spindle organization	105	-0.588828	-2.48236	1e-10	2.71038e-09	1.58696e-09	4446	tags=50%, list=18%, signal=42%	10579/80258/6683/79998/79643/55125/8658/1778/11200/2801/27175/10540/3304/23636/4733/4134/90990/10726/1104/3796/1639/7415/7756/84722/8480/10274/9371/10460/6905/10403/83540/284403/9793/3925/57405/3832/1062/7283/24137/4751/9493/56992/29899/6790/891/9212/22974/6491/29127/7272/991/9055/3833
BP	GO:0048285	organelle fission	396	-0.502775	-2.4789	1e-10	2.71038e-09	1.58696e-09	3922	tags=39%, list=16%, signal=34%	4292/79643/7474/55125/51343/5902/23236/8658/9650/80198/27030/10201/23212/255324/11200/81929/23244/5719/2801/225689/27175/10540/25936/1761/23310/3304/23636/4733/5824/84861/8815/348654/90990/7329/55124/27127/10005/10726/84501/10300/10459/10919/27436/1104/80179/79075/79703/10419/701/3796/4976/9820/64682/51547/83990/192111/7589/29988/116138/9031/29893/23126/5889/9088/11077/84930/3209/51433/7756/9183/…
BP	GO:0032508	DNA duplex unwinding	79	-0.608051	-2.47457	1e-10	2.71038e-09	1.58696e-09	2209	tags=61%, list=9%, signal=56%	55636/10973/2547/10111/165545/6742/25913/7486/51750/10856/1763/6832/5982/57680/79075/1108/84515/83990/56897/9400/1653/2071/84296/1663/3159/8438/8607/5985/54821/1660/4174/51659/9557/64785/63922/5983/4175/80119/25788/9401/4172/5984/4173/641/4176/4171/10721/7153
BP	GO:0098754	detoxification	121	0.521152	2.47331	1e-10	2.71038e-09	1.58696e-09	3388	tags=39%, list=13%, signal=34%	10516/4502/5743/1193/3040/3043/4489/4493/114757/4501/4499/4494/7837/27244/2947/4780/4846/127/4495/4056/2950/22977/2878/64359/948/2643/847/128/2946/4496/6280/2098/2954/6649/3047/4353/3048/2745/241/3240/9446/216/337/5742/10935/2880/2944
BP	GO:0071103	DNA conformation change	90	-0.597885	-2.47108	1e-10	2.71038e-09	1.58696e-09	4874	tags=57%, list=19%, signal=46%	3148/84083/2547/10111/165545/6742/25913/7486/51750/10856/1763/116447/6832/7156/5982/57680/79075/1108/84515/83990/56897/9400/1653/2071/84296/1663/3159/8438/8607/5985/54821/1660/4174/51659/9557/8940/64785/63922/5983/4175/80119/25788/9401/4172/5984/4173/641/4176/4171/10721/7153
BP	GO:0070372	regulation of ERK1 and ERK2 cascade	267	0.466226	2.47098	1e-10	2.71038e-09	1.58696e-09	4521	tags=41%, list=18%, signal=34%	8685/6368/7010/1230/5156/6359/920/5322/9464/10253/2358/1436/11117/57447/10268/6352/148/4889/3357/8074/728/6347/7099/26191/6369/387129/3553/6366/6363/10125/7078/2950/56034/960/10979/1969/116/2621/80310/55584/374403/26281/388372/8661/948/5609/8837/972/1848/2149/467/414062/5728/59341/6504/3084/6237/10252/8600/5031/2056/255743/3725/4067/408/84868/140885/5151/27020/151306/5788/6349/8829/6348/55885/168…
BP	GO:0002685	regulation of leukocyte migration	195	0.486389	2.46784	1e-10	2.71038e-09	1.58696e-09	3601	tags=35%, list=14%, signal=31%	10894/1893/6387/11314/1230/64805/2358/1436/653/11117/3162/63940/6403/5734/3554/81704/10164/1398/975/6352/5641/5880/4615/199/728/6347/7057/6369/6366/6363/58494/719/301/6793/729230/2621/80310/9353/1240/1906/5764/6401/972/961/6688/2841/59341/6504/4354/7424/11035/4067/3569/207/2833/83700/3565/3958/6348/245937/347/3676/391/2185/79890/7124/1843/5724/57118
BP	GO:0002263	cell activation involved in immune response	267	0.46506	2.4648	1e-10	2.71038e-09	1.58696e-09	3504	tags=38%, list=14%, signal=33%	1776/11314/4092/8809/11027/1378/3162/5734/2294/8320/695/975/3142/84106/942/117157/114836/10875/5880/4615/7099/3815/114548/6363/10125/2207/5293/4035/7305/1794/6844/4818/6774/64581/5294/301/28514/3822/729230/4063/3394/3594/8832/201294/5105/5729/6095/3662/2625/2268/972/8993/11151/6688/5730/640/5336/6194/55619/6504/3598/8773/139818/5450/8291/959/4242/2213/3122/3134/306/3689/10538/4067/3445/84868/3569…
BP	GO:0002366	leukocyte activation involved in immune response	264	0.46631	2.46265	1e-10	2.71038e-09	1.58696e-09	3591	tags=38%, list=14%, signal=33%	1776/11314/4092/8809/11027/1378/3162/5734/2294/8320/695/975/3142/84106/942/117157/114836/10875/5880/4615/7099/3815/114548/6363/10125/2207/5293/7305/1794/6844/4818/6774/64581/5294/301/28514/3822/729230/4063/3394/3594/8832/201294/5105/5729/6095/3662/2625/2268/972/8993/11151/6688/5730/640/5336/6194/55619/6504/3598/8773/139818/5450/8291/959/4242/2213/3122/3134/306/3689/10538/4067/3445/84868/3569/3109…
BP	GO:1990266	neutrophil migration	116	0.520943	2.46176	1e-10	2.71038e-09	1.58696e-09	3613	tags=40%, list=14%, signal=34%	6368/3680/6359/3554/6279/6283/6352/5142/5880/4615/728/6347/6369/3553/6366/6363/2207/5293/1441/719/5294/9353/6372/388372/1906/972/7409/6280/2920/414062/4354/3689/5175/10451/83700/3958/6349/6348/6288/54210/57580/6850/391/6362/57118/6357
BP	GO:0032392	DNA geometric change	83	-0.601901	-2.45986	1e-10	2.71038e-09	1.58696e-09	4874	tags=60%, list=19%, signal=49%	55636/10973/3148/84083/2547/10111/165545/6742/25913/7486/51750/10856/1763/6832/5982/57680/79075/1108/84515/83990/56897/9400/1653/2071/84296/1663/3159/8438/8607/5985/54821/1660/4174/51659/9557/64785/63922/5983/4175/80119/25788/9401/4172/5984/4173/641/4176/4171/10721/7153
MF	GO:0008094	ATP-dependent activity, acting on DNA	91	-0.594026	-2.45872	1e-10	2.71038e-09	1.58696e-09	2209	tags=45%, list=9%, signal=41%	5982/57680/79075/50485/1108/84515/5981/4436/2956/83990/56897/9400/5889/1653/2071/1663/8438/6597/8607/8458/7517/5985/54821/1660/4174/9557/63922/6596/5983/4175/80119/25788/9401/4172/5984/4173/641/4176/4171/10721/7153
BP	GO:0034341	response to interferon-gamma	134	0.50922	2.45682	1e-10	2.71038e-09	1.58696e-09	3613	tags=43%, list=14%, signal=37%	6368/6359/11093/8519/6352/55647/199/6347/7099/6369/4609/6366/6363/3055/834/7098/7294/2934/7097/356/3394/388372/3594/10435/1906/3717/7454/2643/9482/972/6622/7431/961/10241/414062/445/684/58191/3113/23521/3716/115362/140885/6349/3659/6348/9341/6556/1612/3263/7376/7124/6362/3593/6814/115361/8942/6357
BP	GO:1903038	negative regulation of leukocyte cell-cell adhesion	119	0.521008	2.45437	1e-10	2.71038e-09	1.58696e-09	3504	tags=41%, list=14%, signal=36%	6387/339390/11326/11314/10288/4092/5621/1378/6441/1511/9314/3142/942/10875/864/26191/2615/6366/301/79679/54900/80380/2737/972/79626/445/135/384/2213/57045/7805/84868/207/3566/3565/3958/84695/604/3659/8379/3902/11006/56940/1051/941/27242/3559/2064/3456
BP	GO:0031349	positive regulation of defense response	256	0.467987	2.45271	1e-10	2.71038e-09	1.58696e-09	4764	tags=44%, list=19%, signal=36%	5138/90865/353514/5322/2358/11126/5743/912/9173/11027/11117/63940/185/3824/5734/2534/695/2113/975/7132/6279/6283/2219/6352/4889/117157/114836/7099/6369/10666/3553/10125/3055/81030/3428/834/7305/7098/149628/4818/64581/5294/3133/7294/3822/4068/729230/2167/3603/3572/7097/51311/3717/4153/6622/7409/3600/6280/961/3823/120892/6688/5336/59341/58484/3665/5359/241/8600/1535/3134/4067/115362/84868/8692/3569…
BP	GO:0045766	positive regulation of angiogenesis	145	0.501573	2.4518	1e-10	2.71038e-09	1.58696e-09	3098	tags=36%, list=12%, signal=32%	1893/2658/7010/2022/6915/133/2152/3162/5740/147372/388/2113/126393/9314/3082/94/7048/4780/8742/4846/1003/728/7057/6369/10800/3553/1536/5293/7075/719/7098/6774/820/3091/2627/28514/7852/23411/63923/6237/7424/23328/306/64094/3716/8829/358/168667/51129/2549/10411/2185
BP	GO:1904018	positive regulation of vasculature development	145	0.501573	2.4518	1e-10	2.71038e-09	1.58696e-09	3098	tags=36%, list=12%, signal=32%	1893/2658/7010/2022/6915/133/2152/3162/5740/147372/388/2113/126393/9314/3082/94/7048/4780/8742/4846/1003/728/7057/6369/10800/3553/1536/5293/7075/719/7098/6774/820/3091/2627/28514/7852/23411/63923/6237/7424/23328/306/64094/3716/8829/358/168667/51129/2549/10411/2185
BP	GO:0007051	spindle organization	151	-0.55049	-2.44809	1e-10	2.71038e-09	1.58696e-09	4446	tags=46%, list=18%, signal=38%	10579/80258/440270/6683/79998/4292/79643/55125/8658/1778/11200/8841/2801/225689/27175/10540/3304/23636/4733/4134/90990/10726/1453/1104/3796/55835/3985/1639/7415/55722/27229/203068/7756/84722/8480/10274/9371/10460/9700/6905/10403/83540/26271/10615/284403/9793/3925/57405/3619/3832/1062/7283/24137/4751/9493/56992/29899/6790/891/9212/22974/29901/6491/29127/9133/7272/991/9055/3833/259266
BP	GO:1901342	regulation of vasculature development	251	0.466748	2.44441	1e-10	2.71038e-09	1.58696e-09	4307	tags=37%, list=17%, signal=31%	1893/2658/6422/7010/2022/1634/6915/133/10253/11126/2152/11117/3162/5740/147372/8434/3397/388/2113/126393/9314/9510/3082/94/7048/23166/4780/8742/10365/4846/1003/728/7057/26051/6369/10800/3553/1536/5293/7075/719/7098/6774/820/3091/2627/28514/729230/1969/356/1285/7852/23411/63923/240/6237/57381/7122/7424/23328/306/5176/64094/3716/3569/64218/2296/5797/6678/8829/358/168667/51129/2752/2549/10411/2185/5…
BP	GO:0070371	ERK1 and ERK2 cascade	289	0.45599	2.44072	1e-10	2.71038e-09	1.58696e-09	4521	tags=40%, list=18%, signal=33%	8685/6368/7010/1230/5156/6359/920/5322/9464/10253/2358/1436/11117/5734/57447/10268/6352/148/4889/3357/677/8074/1847/728/6347/7099/26191/6369/387129/4609/3553/6366/6363/10125/7078/678/2950/56034/960/10979/1969/116/2621/80310/55584/374403/26281/388372/8661/948/1906/5609/8837/972/1848/2149/467/414062/5728/59341/6504/3084/6237/10252/8600/5031/2056/255743/3725/4067/408/84868/140885/5151/27020/151306/5…
BP	GO:0046395	carboxylic acid catabolic process	215	0.471867	2.4341	1e-10	2.71038e-09	1.58696e-09	5601	tags=52%, list=22%, signal=41%	2639/4846/51166/443/51380/3242/23417/4942/4329/56898/8529/1592/54511/3067/6999/84693/10157/5105/2110/594/37/3176/84129/2954/8564/27165/6898/64577/384/197257/60496/3155/3712/4143/1036/10449/549/132789/30/6470/207/55862/5860/33/3033/83752/54363/35/2746/137872/1376/66002/2875/144193/1962/18/2752/593/55577/84706/51268/10841/875/64902/51390/32/2805/2653/5095/8942/1666/34/10993/80896/131669/11112/58510…
BP	GO:0007088	regulation of mitotic nuclear division	102	-0.575098	-2.42666	1e-10	2.71038e-09	1.58696e-09	3064	tags=45%, list=12%, signal=40%	10201/255324/1761/23636/84861/348654/10459/1104/10419/701/9820/9088/3209/51433/7756/9183/51434/5885/286053/9700/7517/10403/27085/995/26271/55755/55055/8697/51529/9735/4085/1111/81620/11130/9319/4288/157313/4751/1063/286151/6790/699/891/9212/7272/51203
BP	GO:0007093	mitotic cell cycle checkpoint signaling	109	-0.572297	-2.42621	1e-10	2.71038e-09	1.58696e-09	1680	tags=38%, list=7%, signal=35%	65123/1017/701/84936/4436/54962/80279/9656/11073/5883/7756/9183/57551/55159/7517/1386/990/10403/146956/29980/5591/51514/60561/835/55755/672/55055/9735/4085/1111/81620/11130/9319/51512/2177/641/1063/699/891/9212/7272
BP	GO:0030168	platelet activation	122	0.511768	2.4222	1e-10	2.71038e-09	1.58696e-09	3488	tags=38%, list=14%, signal=33%	5156/114897/558/64805/11093/22915/3043/6403/1511/7056/10461/4846/7099/375033/2207/5294/7294/5023/3572/3717/5341/7409/2149/640/5336/10077/5359/959/7450/10672/4067/5588/3569/3932/10451/1606/83706/18/10398/6288/6850/10019/2811/3690/151/6814
BP	GO:0022408	negative regulation of cell-cell adhesion	169	0.487753	2.42188	1e-10	2.71038e-09	1.58696e-09	3504	tags=39%, list=14%, signal=34%	6387/339390/11326/11314/114897/654/10288/4092/5621/1378/6441/1511/9314/3142/942/10875/864/26191/2615/6366/301/80709/79679/54900/80380/3717/2737/91663/972/6688/79626/59341/445/135/10653/384/2213/57045/7805/84868/207/3566/3565/3958/84695/604/3659/53827/8379/3902/11006/56940/18/4155/5340/10019/1051/80139/941/5598/27242/3559/335/5962/2064/3456
BP	GO:0045765	regulation of angiogenesis	247	0.462211	2.42129	1e-10	2.71038e-09	1.58696e-09	4307	tags=37%, list=17%, signal=31%	1893/2658/6422/7010/2022/1634/6915/133/10253/11126/2152/11117/3162/5740/147372/8434/388/2113/126393/9314/9510/3082/94/7048/23166/4780/8742/10365/4846/1003/728/7057/26051/6369/10800/3553/1536/5293/7075/719/7098/6774/820/3091/2627/28514/729230/1969/356/1285/7852/23411/63923/240/6237/57381/7122/7424/23328/306/5176/64094/3716/3569/64218/2296/5797/6678/8829/358/168667/51129/2752/2549/10411/2185/5598/7…
CC	GO:0000781	chromosome, telomeric region	118	-0.563905	-2.42016	1e-10	2.71038e-09	1.58696e-09	4935	tags=52%, list=20%, signal=42%	9894/5499/5514/2547/10111/5884/11016/2072/80145/65986/25913/65057/6672/7486/51750/1642/7015/8658/1763/11200/9025/84321/5111/5501/7158/9984/222229/79228/9219/84661/55226/1108/1017/4436/57459/56897/4221/8563/328/23468/7515/286053/7517/4174/11335/5591/5424/4175/24144/80119/9401/142/1111/4172/2237/10635/4173/641/4176/4171/2146
BP	GO:0050777	negative regulation of immune response	165	0.491097	2.41851	1e-10	2.71038e-09	1.58696e-09	2968	tags=34%, list=12%, signal=30%	339390/11326/11314/4092/11126/9173/1378/3162/3824/64092/11213/1604/2294/2534/1398/2/3142/710/4889/10875/3055/3428/3575/301/3133/729230/10225/8832/79132/3635/2268/8993/6688/3821/3106/6504/3598/384/722/4938/2213/3134/4067/84868/3566/3565/3958/5788/84695/6778/604/11006/3805/56940/9958/6850
BP	GO:0002822	regulation of adaptive immune response based on somatic recombination of immune receptors built from immunoglobulin superfamily domains	160	0.490721	2.41601	1e-10	2.71038e-09	1.58696e-09	5291	tags=49%, list=21%, signal=39%	339390/920/4092/8809/912/9173/1378/3824/1604/3554/7133/695/975/3142/10666/114548/3553/6363/3575/567/64581/301/3133/729230/3125/10673/3594/7454/1178/2625/3821/91543/3106/6504/3136/722/11035/2213/3122/3134/84868/5588/3569/3566/3565/5788/84695/6778/604/11006/56940/4208/10892/8417/7189/2048/6556/941/3263/7124/3593/3456/563/911/64170/79915/84807/5532/177/383/3071/940/121260/54440/118460/29126/8741/913…
BP	GO:0006275	regulation of DNA replication	106	-0.56897	-2.4098	1e-10	2.71038e-09	1.58696e-09	3578	tags=51%, list=14%, signal=44%	25792/10856/80174/1763/23244/5515/146059/4798/3060/5111/59343/29844/7270/79913/5982/10919/51053/23560/79075/50485/1017/54962/10269/56897/64863/86/51377/79733/57695/8317/11124/84296/54108/8607/30968/5985/1660/990/51659/29980/27154/64785/3980/10445/26271/63922/5983/54107/144455/81620/5984/641/8914/890
CC	GO:0062023	collagen-containing extracellular matrix	400	0.437181	2.40891	1e-10	2.71038e-09	1.58696e-09	4089	tags=35%, list=16%, signal=30%	83854/1893/6387/5199/8406/10516/6422/7123/8547/8483/2220/1634/9509/4239/1805/4684/22915/59277/2152/713/11117/10319/712/3908/127435/10418/714/1511/7837/2/9510/8425/6279/710/2219/1842/9068/10875/633/8510/1667/1520/7057/5118/64129/1292/7043/7078/23452/2331/3490/5549/91522/301/165/30008/2239/4060/310/1359/653145/7373/25890/1285/4153/1178/1286/2158/25878/1291/4313/1508/6280/7177/161198/6649/63923/7472…
BP	GO:0000075	cell cycle checkpoint signaling	143	-0.545305	-2.40585	1e-10	2.71038e-09	1.58696e-09	4141	tags=44%, list=16%, signal=37%	8091/26272/261726/51343/80198/1763/11200/10116/56658/4193/84861/348654/7158/9984/10459/27339/79968/65123/1017/701/84936/4436/54962/83990/80279/9656/8563/11073/5883/7756/9183/25896/57551/84126/55159/7517/1386/990/10403/146956/29980/5591/51514/60561/835/55755/672/55055/9735/4085/1111/81620/11130/9319/51512/2177/641/1063/8914/699/891/9212/7272
BP	GO:0006403	RNA localization	162	-0.535496	-2.40109	1e-10	2.71038e-09	1.58696e-09	5081	tags=53%, list=20%, signal=43%	8106/2091/26993/3837/23279/9961/9688/54830/10211/55677/55011/80145/65110/10694/56648/8658/2332/29074/10856/1069/24148/81929/22916/7884/29072/23636/10574/23089/220988/6311/84321/6830/59343/10644/10576/399664/9984/79228/7248/8570/10073/9972/10762/55746/2733/22948/3297/348995/908/65109/55164/56943/1736/29890/23511/11052/8563/26019/10575/10642/25909/7514/10128/23144/22794/65083/8480/3182/23225/57122/…
MF	GO:0019838	growth factor binding	126	0.503683	2.39955	1e-10	2.71038e-09	1.58696e-09	3492	tags=41%, list=14%, signal=36%	3977/5156/2022/3587/3486/3554/7837/3489/2/94/8425/7048/4804/7049/7057/2615/51232/7043/92/3560/3490/1969/199713/3572/2690/948/1291/25987/6386/2322/3485/85409/3487/57045/83888/3488/3483/8692/3484/5654/81621/8829/27286/4915/3643/5046/64285/3559/3690/9180/2064/9702
BP	GO:0016054	organic acid catabolic process	218	0.464188	2.39737	1e-10	2.71038e-09	1.58696e-09	5601	tags=51%, list=22%, signal=40%	2639/4846/51166/443/51380/3242/23417/4942/4329/56898/8529/1592/54511/3067/6999/84693/10157/5105/2110/594/37/3176/84129/2954/8564/27165/6898/64577/384/197257/60496/3155/3712/4143/1036/10449/549/132789/30/6470/207/55862/5860/33/3033/83752/54363/35/2746/137872/1376/66002/2875/144193/1962/18/2752/593/55577/84706/51268/10841/875/64902/51390/32/2805/2653/5095/8942/1666/34/10993/80896/131669/11112/58510…
BP	GO:0034754	cellular hormone metabolic process	131	0.496446	2.38569	1e-10	2.71038e-09	1.58696e-09	4625	tags=42%, list=18%, signal=34%	5156/654/133/9227/653/1910/125/5947/1544/2099/5959/220/127/54658/1576/124/27122/1559/1592/83875/54884/10170/8608/130/64577/1558/54659/126/1565/9249/25976/1543/6716/6715/1958/3294/8228/216/54361/51170/6783/151056/706/1551/7923/51144/57104/1562/10202/6718/7366/59338/57665/5950/6817
MF	GO:0016887	ATP hydrolysis activity	277	-0.500928	-2.38305	1e-10	2.71038e-09	1.58696e-09	4002	tags=42%, list=16%, signal=36%	9361/5704/5706/5190/4292/51750/9879/4343/1656/22836/22985/27030/3309/10856/1763/83858/23046/3799/11104/3312/9775/3304/10101/10574/6832/90957/90990/55210/11056/79029/1662/27127/5982/10576/10808/9704/11325/57696/57680/5702/80179/54505/4905/10939/64794/54555/1108/84515/22948/3796/908/5395/5981/3329/4436/83990/664618/56897/7415/10525/9400/79039/10575/51182/1653/5701/27348/60625/22907/57647/2071/1663/…
BP	GO:1902850	microtubule cytoskeleton organization involved in mitosis	128	-0.548478	-2.38165	1e-10	2.71038e-09	1.58696e-09	4446	tags=48%, list=18%, signal=39%	10579/80258/6683/79998/79643/55125/8658/1778/11200/29072/2801/27175/10540/3304/23636/4733/4134/90990/10726/23291/1104/3796/1639/7415/7756/9183/84722/8480/10274/9371/10460/9700/6905/10403/83540/55755/284403/9793/3925/57405/4085/3832/1062/7283/24137/4751/9493/56992/29899/1058/6790/891/9212/22974/6491/29127/7272/991/9055/3833/51203
BP	GO:0019724	B cell mediated immunity	134	0.492787	2.37753	1e-10	2.71038e-09	1.58696e-09	2545	tags=36%, list=10%, signal=32%	730/713/1378/715/712/1604/714/695/51279/3543/975/710/716/4615/3426/10666/735/2207/567/3133/3125/939/51311/4153/3635/972/729/3115/3598/1191/3665/10747/3113/722/959/325/2213/3122/3111/3117/10538/84174/3109/3566/3565/5788/6778/604
BP	GO:1903131	mononuclear cell differentiation	405	0.434165	2.37684	1e-10	2.71038e-09	1.58696e-09	3518	tags=37%, list=14%, signal=33%	6422/558/10288/920/4092/8809/1436/912/1378/5734/8320/695/925/7048/3142/942/677/114836/10875/10461/864/26191/55509/639/5153/4609/3702/3815/114548/3553/6363/4495/10125/2207/112616/3428/5293/9935/3575/1794/567/678/6774/301/28514/3398/729230/4063/2621/10673/939/3394/3594/2736/4066/5105/6095/596/3662/9474/2737/2625/3635/972/4783/7704/7535/8993/7409/3600/6688/3821/915/2322/640/91543/5336/6194/2841/5561…
BP	GO:0016064	immunoglobulin mediated immune response	131	0.492984	2.36905	1e-10	2.71038e-09	1.58696e-09	2545	tags=36%, list=10%, signal=32%	730/713/1378/715/712/1604/714/695/51279/3543/975/710/716/4615/3426/10666/735/2207/567/3133/3125/939/51311/4153/3635/972/729/3115/3598/1191/3665/10747/3113/722/959/325/2213/3122/3111/3117/10538/3109/3566/3565/5788/6778/604
BP	GO:1903046	meiotic cell cycle process	162	-0.526959	-2.36281	1e-10	2.71038e-09	1.58696e-09	4434	tags=43%, list=18%, signal=35%	2072/56159/56154/5017/4292/7474/51343/23236/80198/27030/5719/2801/225689/27175/1761/23310/55124/84501/10919/79703/701/2956/51547/83990/7589/29988/116138/29893/5889/11077/84930/5885/8438/993/9700/29781/63979/10403/84057/4439/83540/146956/898/995/26271/11022/81930/80010/9918/10592/25788/3619/9319/2177/9134/994/10635/7283/286151/1164/6790/699/10051/9232/9133/7272/991/7153/259266
CC	GO:0072686	mitotic spindle	118	-0.54984	-2.3598	1e-10	2.71038e-09	1.58696e-09	3658	tags=43%, list=15%, signal=37%	8658/51199/8841/11104/2801/23636/84861/4134/90990/10726/55920/23005/28964/27436/3297/3985/8655/1639/5905/8317/150275/8480/10274/10460/9700/990/146909/60509/8502/252839/10615/81930/55755/284403/4085/81610/3832/1062/7283/9493/29899/6790/9212/22974/29127/150468/9055/3833/1894/51203/259266
MF	GO:0030246	carbohydrate binding	228	0.453965	2.3594	1e-10	2.71038e-09	1.58696e-09	3735	tags=34%, list=15%, signal=29%	10584/339390/51266/1621/78989/2022/7123/8547/2220/27036/114132/10332/3101/160364/6614/30835/3820/3824/945/6403/6441/969/51348/10219/6320/27180/2219/23324/9936/10462/55600/6402/283420/64581/6515/89790/3822/51267/7360/9976/5033/140578/4153/1178/22925/6401/971/3823/27181/3821/161198/5066/1203/50856/2646/143903/160365/325/29124/3122/5507/9902/5553/3958/165530/8987/5213/4123/50489/5509/3998/433/2203/4…
BP	GO:0009636	response to toxic substance	209	0.455401	2.35385	1e-10	2.71038e-09	1.58696e-09	3388	tags=34%, list=13%, signal=30%	11185/10516/11093/4502/5743/1193/3040/3043/4489/4493/114757/4501/4499/4494/7837/6352/27244/2947/23428/4780/4846/127/4495/4056/2353/2950/22977/2627/4255/7097/10249/2878/7054/64359/948/2643/596/847/128/2946/65018/4496/6280/2098/2954/6649/3047/4353/445/3048/8303/2745/4129/241/57165/4067/3240/1543/468/6715/9446/2053/6348/216/4155/337/5742/10935/2880/4131/7124/2944
BP	GO:0030098	lymphocyte differentiation	359	0.431384	2.35287	1e-10	2.71038e-09	1.58696e-09	3518	tags=37%, list=14%, signal=33%	6422/558/10288/920/4092/8809/912/1378/5734/8320/695/925/7048/3142/942/677/114836/10875/10461/864/26191/639/3702/3815/114548/3553/6363/10125/2207/112616/5293/9935/3575/1794/567/678/6774/301/28514/3398/729230/4063/2621/10673/939/3394/3594/2736/4066/5105/6095/596/3662/9474/2737/2625/3635/972/4783/7704/7535/8993/7409/3600/6688/3821/915/2322/91543/5336/6194/2841/55619/6504/472/914/139818/916/5450/1021…
MF	GO:0004386	helicase activity	137	-0.532454	-2.33824	1e-10	2.71038e-09	1.58696e-09	3893	tags=47%, list=15%, signal=40%	51750/9879/4343/1656/10856/1763/9931/6499/9775/6832/90957/11056/1662/5982/9704/11325/57696/57680/54505/79075/50485/64794/54555/1108/84515/83990/56897/9400/79039/1653/60625/22907/57647/2071/1663/9416/1659/51428/54606/8438/6597/8607/8458/8449/5985/54821/1660/4174/9557/63922/6596/5983/4175/80119/25788/9401/3070/4172/5984/4173/641/4176/4171/10721
BP	GO:0002700	regulation of production of molecular mediator of immune response	148	0.476706	2.33559	1e-10	2.71038e-09	1.58696e-09	3504	tags=40%, list=14%, signal=35%	4092/11126/8809/1378/3162/11213/1604/3554/7133/695/975/942/7099/26191/10666/3815/114548/3553/7043/7098/567/64581/3133/729230/10225/948/1178/9474/23411/2625/972/91543/5336/6504/684/3598/959/2213/3134/7805/3569/115352/3566/3565/51744/5788/6778/604/11006/3805/10892/7189/2048/3263/54106/335/7124/284/3456
BP	GO:0051384	response to glucocorticoid	135	0.482007	2.33154	1e-10	2.71038e-09	1.58696e-09	2893	tags=38%, list=11%, signal=34%	654/133/10888/5743/2/5069/7538/249/677/11170/199/3931/54658/2354/3490/2353/678/301/9353/7054/2690/2908/1906/3717/5105/8837/596/8061/594/595/687/2322/5066/445/6898/4129/3485/5327/2056/1036/306/5176/590/5020/3569/6715/5447/358/54206/10076/6586
BP	GO:0030217	T cell differentiation	246	0.443229	2.32621	1e-10	2.71038e-09	1.58696e-09	4014	tags=41%, list=16%, signal=35%	10288/920/4092/8809/912/1378/5734/8320/925/7048/3142/942/677/114836/10875/864/26191/639/3702/3815/114548/3553/6363/10125/2207/5293/9935/3575/1794/567/678/6774/301/729230/4063/939/3594/2736/5105/6095/596/3662/9474/2737/2625/972/7704/7535/7409/3600/6688/3821/915/91543/6194/2841/914/916/1021/11035/3953/3122/64919/3111/3707/10538/6146/3569/3932/860/1958/64218/3566/3565/5788/84695/6778/604/3659/3902/1…
BP	GO:0140013	meiotic nuclear division	145	-0.526174	-2.32294	1e-10	2.71038e-09	1.58696e-09	3922	tags=40%, list=16%, signal=34%	4292/7474/51343/23236/80198/27030/5719/2801/225689/1761/55124/84501/10919/79703/701/51547/83990/7589/29988/116138/29893/5889/11077/84930/5885/8438/9700/29781/63979/10403/84057/4439/83540/146956/898/26271/11022/81930/80010/10592/25788/3619/9319/2177/9134/994/10635/286151/1164/6790/699/10051/9232/9133/7272/991/7153/259266
BP	GO:0019221	cytokine-mediated signaling pathway	429	0.418598	2.31804	1e-10	2.71038e-09	1.58696e-09	4311	tags=36%, list=17%, signal=30%	10990/1893/6387/6368/3977/1230/90865/353514/558/10288/6359/920/10148/83643/3587/8809/1436/2152/9173/11027/11213/3554/8807/1511/8519/7133/7837/7132/6352/4615/59307/10663/6347/6369/3459/3815/583/3553/6366/6363/4939/2207/3055/81030/3568/834/3575/1441/3560/608/2950/6774/3091/9971/960/7294/729230/2621/9353/6372/2057/1240/3572/10673/2690/388372/3594/1906/3717/2180/355/7852/5048/23411/6775/972/64388/110…
MF	GO:0005201	extracellular matrix structural constituent	159	0.467207	2.29739	1e-10	2.71038e-09	1.58696e-09	4011	tags=36%, list=16%, signal=30%	1893/8406/10516/170392/8483/1634/920/4239/1805/22915/11117/7980/3908/127435/10418/7837/8425/10875/633/7057/5118/64129/1292/2331/3490/5549/91522/165/30008/4060/7373/25890/1285/1286/25878/1291/255743/3913/7450/2202/4969/5553/6678/2201/4588/27286/1308/7007/4256/1296/2199/1310/3912/2244/4147/1305/2006
BP	GO:0022613	ribonucleoprotein complex biogenesis	312	-0.47713	-2.29653	1e-10	2.71038e-09	1.58696e-09	6040	tags=51%, list=24%, signal=39%	27340/3921/23016/84128/6632/84135/23195/6175/79707/2068/55272/29889/25983/545/10360/26576/55636/54663/79922/64979/2091/85865/10436/3320/2971/55011/10799/10421/23160/10969/51096/58155/57461/29093/23223/51121/10607/51335/285855/51081/22803/10856/10907/51018/6227/23212/23481/285367/24148/6634/8562/90441/10438/29081/79050/10813/10885/387338/29777/6201/63899/65095/92856/9775/9790/8175/56915/11056/5101…
BP	GO:0007204	positive regulation of cytosolic calcium ion concentration	285	0.430518	2.29456	1e-10	2.71038e-09	1.58696e-09	2590	tags=27%, list=10%, signal=25%	147/1230/5156/114897/6915/5732/2357/133/2358/5621/8477/1910/185/1193/1604/5734/2534/10268/1902/148/3357/2359/2099/10663/728/10800/387129/6366/6363/5144/719/5294/729230/5739/3270/5023/116/55584/126306/60675/1240/356/27334/948/1906/3717/7852/5729/596/9474/6622/2946/952/11151/5311/2149/5336/2841/59341/1043/796/477/5031/1535/2056/79608/10672/5020/4067/55503/3932/287/2833/27020/9446/5788/4308/6348
CC	GO:0005819	spindle	308	-0.475281	-2.28466	1e-10	2.71038e-09	1.58696e-09	5854	tags=47%, list=23%, signal=37%	7175/1780/8086/9587/3174/2068/84259/9094/1499/84056/10928/114791/84643/79718/8243/347688/9657/79184/201163/5607/2017/22920/79848/808/55540/7029/80258/1211/6683/84942/8409/79998/51335/79643/9857/8658/7813/51199/5515/8841/11104/2010/2801/225689/27175/11083/3315/23170/10927/27130/23636/10101/84861/4134/90990/79029/10726/10300/10459/27339/4957/55920/1453/23005/28964/7443/27436/3297/701/3796/150465/39…
BP	GO:0006397	mRNA processing	348	-0.469306	-2.28239	1e-10	2.71038e-09	1.58696e-09	4505	tags=39%, list=18%, signal=33%	6829/10084/55677/10421/10915/80145/4236/60493/58155/23210/57461/25766/284695/378950/10286/9879/23658/134353/84811/56903/22803/2332/55596/22985/55280/10907/285367/24148/55234/6634/22916/7884/6827/221662/6629/81608/904/3312/80746/9775/6627/153527/55339/56254/220988/84321/6830/55285/8175/8731/10921/29894/7072/55796/55696/9810/51340/27336/23076/9984/27339/79706/79228/8570/4116/79005/6636/26121/10432/…
BP	GO:0050657	nucleic acid transport	130	-0.525409	-2.28105	1e-10	2.71038e-09	1.58696e-09	5081	tags=53%, list=20%, signal=43%	8106/26993/3837/23279/9961/9688/54830/10211/55677/80145/65110/56648/8658/2332/29074/1069/81929/22916/7884/29072/23636/23089/220988/6311/84321/6830/59343/10644/9984/79228/7248/8570/10073/9972/10762/55746/2733/3297/348995/65109/56943/29890/23511/11052/8563/26019/10642/25909/7514/10128/23144/65083/8480/23225/57122/4686/9883/9887/79023/1660/10643/79902/23381/11260/5433/57510/9793/9631/23165
BP	GO:0050658	RNA transport	130	-0.525409	-2.28105	1e-10	2.71038e-09	1.58696e-09	5081	tags=53%, list=20%, signal=43%	8106/26993/3837/23279/9961/9688/54830/10211/55677/80145/65110/56648/8658/2332/29074/1069/81929/22916/7884/29072/23636/23089/220988/6311/84321/6830/59343/10644/9984/79228/7248/8570/10073/9972/10762/55746/2733/3297/348995/65109/56943/29890/23511/11052/8563/26019/10642/25909/7514/10128/23144/65083/8480/23225/57122/4686/9883/9887/79023/1660/10643/79902/23381/11260/5433/57510/9793/9631/23165
BP	GO:0043410	positive regulation of MAPK cascade	432	0.409948	2.27985	1e-10	2.71038e-09	1.58696e-09	3803	tags=34%, list=15%, signal=29%	8685/6368/4908/147/7010/1230/5156/114897/353514/6359/920/5322/9464/10253/2358/1436/85458/57161/3489/4616/975/3082/10268/8826/1902/6283/6352/148/4889/3357/4615/8074/728/6347/7099/26191/7057/6369/387129/3815/3553/6366/6363/10125/7043/653361/7098/23533/64581/5294/56034/10174/960/221472/10979/116/2621/80310/10550/51562/7039/939/9770/26281/2690/2081/388372/948/1906/3717/5609/8837/972/60370/7164/120892…
BP	GO:0006399	tRNA metabolic process	136	-0.519622	-2.27815	1e-10	2.71038e-09	1.58696e-09	4943	tags=46%, list=20%, signal=37%	11180/24140/10056/285605/10799/55621/51002/26610/10667/55687/83707/5441/9330/9836/283459/63899/56931/54901/27304/80746/339175/55798/126789/51728/51010/10940/2975/55039/64172/55699/23395/2193/64118/144233/80755/124454/4234/55226/80324/84267/54522/57176/10248/23404/127253/1653/80222/2976/23438/84705/79897/11062/10785/81605/8270/9328/51654/6894/51367/283989/54517/55157/26024
BP	GO:1902105	regulation of leukocyte differentiation	259	0.431461	2.27808	1e-10	2.71038e-09	1.58696e-09	3504	tags=35%, list=14%, signal=31%	6422/1230/558/10288/920/4092/1378/2124/714/695/3059/7048/3142/942/677/10875/864/7099/639/4609/114548/6363/10125/9935/3575/7305/7098/2353/678/301/3398/729230/2621/939/9770/3594/2736/10272/5105/3662/2737/2625/3635/972/7704/7535/8993/11025/3600/4920/7107/10234/3106/914/3665/5457/8600/1021/325/2213/3122/3111/3707/4067/5295/115352/3566/3565/5788/84695/604/3659/6348/55294/3902/11006/5925/10892/6850/718…
BP	GO:0006282	regulation of DNA repair	115	-0.532274	-2.26983	1e-10	2.71038e-09	1.58696e-09	4540	tags=47%, list=18%, signal=39%	2140/51720/56154/25913/8091/64110/51750/55929/10856/7913/5429/29072/51366/9025/60/5111/54799/7158/84501/7398/10459/7335/4968/10902/3297/10155/51547/56897/86/9400/4862/23126/7515/2187/1161/5932/150275/1663/1054/8607/1660/63979/56893/8295/5591/672/24144/6944/142/1111/10635/2305/8914/10721
BP	GO:0042742	defense response to bacterium	241	0.433232	2.26736	1e-10	2.71038e-09	1.58696e-09	3947	tags=33%, list=16%, signal=28%	55576/5199/219972/51316/2220/920/2358/11126/11117/6403/6441/1511/3543/7132/6279/6283/6039/23166/1668/4615/57817/1667/728/7099/4939/2207/3575/7098/820/9971/3133/1969/6037/6372/7097/3394/948/4153/26057/2268/8993/6280/4353/58484/384/1535/4938/22933/116842/306/84868/3240/3569/5553/1669/653423/358/51552/245937/10133/54210/944/6850/1051/6556/245938/10333/5320/245928/54106/7124/3593/115361/566/2244/1040…
BP	GO:0001525	angiogenesis	467	0.403918	2.26588	1e-10	2.71038e-09	1.58696e-09	3673	tags=31%, list=15%, signal=27%	83854/1893/55576/84870/2658/55273/6422/7010/5156/2022/1634/6915/6943/9464/133/10253/11126/5547/5743/2152/11117/3162/185/5740/147372/8434/3397/5787/388/2113/126393/9314/9510/3082/94/7048/4804/23166/4780/8742/10365/4846/1003/728/6347/7057/26051/6369/10855/10800/3553/1536/5293/7075/719/7098/6774/820/5294/301/2034/3091/2627/54922/28514/6303/729230/1969/60675/9353/7039/356/1906/1285/7852/6095/25932/23…
BP	GO:0042060	wound healing	388	0.411915	2.26452	1e-10	2.71038e-09	1.58696e-09	3493	tags=32%, list=14%, signal=28%	5156/114897/558/6915/64805/11093/22915/5547/2152/3162/7980/3043/6403/1511/1398/7056/94/7048/6279/710/4780/9060/10461/90102/4846/7099/7057/10855/3083/375033/2207/5627/7043/4638/64581/5294/301/3091/960/7294/10979/5023/2621/8529/3572/7039/5051/11234/58189/653145/948/2160/1906/3717/7454/7852/26127/8837/5341/2737/2158/7409/10413/25987/2149/54566/640/5728/2159/5336/5530/240/10077/3084/135/5327/5359/829…
MF	GO:0005539	glycosaminoglycan binding	207	0.44109	2.26377	1e-10	2.71038e-09	1.58696e-09	4786	tags=40%, list=19%, signal=33%	10894/55576/84870/6368/6422/2022/7123/1634/6359/5621/6403/1511/83716/9510/8425/7048/23166/1842/7049/633/7057/114548/5118/6402/5549/340419/91522/960/30008/9353/6372/7097/2160/9806/5764/5048/64388/8993/6649/56925/4353/143903/309/59352/64094/6146/8692/5553/5788/3990/284654/8829/11167/3075/4018/6288/11095/6586/55959/5046/2255/7705/1809/334/27329/566/51144/653808/1305/351/7058/10457/4043/404037/51156/…
BP	GO:0030335	positive regulation of cell migration	465	0.404397	2.26367	1e-10	2.71038e-09	1.58696e-09	4045	tags=34%, list=16%, signal=29%	10894/6387/4908/7010/1230/5156/84913/64805/10253/2358/1436/5743/2152/3162/63940/147372/6403/2294/388/3554/81704/2113/1398/9510/3082/7048/6352/5641/4780/11170/5880/199/659/4846/1003/728/7099/7057/6369/4609/3815/3553/6366/6363/58494/5649/5293/719/4638/6774/4739/64581/5294/301/56034/3091/10979/729230/1969/2621/80310/1240/57111/54453/1906/3717/5764/7852/22902/596/23411/2625/2268/91663/972/57142/4313/…
BP	GO:0051321	meiotic cell cycle	214	-0.48561	-2.25744	1e-10	2.71038e-09	1.58696e-09	4434	tags=39%, list=18%, signal=32%	2072/56159/140901/56154/5017/4292/7474/51343/23236/80198/27030/5515/5719/2801/225689/27175/1761/10927/23310/55124/27127/7156/84501/10919/1017/79703/701/2956/51547/83990/7589/29988/116138/27229/29893/5889/9088/11077/84930/5932/9183/5885/56339/8438/993/9700/29781/63979/10403/84057/4439/83540/146956/898/995/26271/11022/81930/80010/9918/24149/10592/25788/9156/3619/9319/2177/9134/994/10635/7283/4751/2…
BP	GO:0031348	negative regulation of defense response	211	0.440268	2.24861	1e-10	2.71038e-09	1.58696e-09	3421	tags=36%, list=14%, signal=31%	11326/7010/8530/2358/1378/284207/5740/3824/11213/5734/2294/2534/7133/1398/9314/2/3082/7132/313/7538/710/9021/4889/10875/57817/1003/114548/3055/3428/2950/9971/89790/3133/58189/10225/64838/6095/79132/9474/2625/2268/54941/8993/3821/79626/3106/240/135/384/4938/325/22933/6397/2213/3134/5176/4067/84868/140885/3565/5654/5788/3949/3805/5925/6288/9958/6850/4790/5598/3479/3559/7376/335/3593
BP	GO:0000377	RNA splicing, via transesterification reactions with bulged adenosine as nucleophile	221	-0.480275	-2.24054	1e-10	2.71038e-09	1.58696e-09	4486	tags=39%, list=18%, signal=33%	10084/10421/4236/58155/23210/57461/25766/10286/9879/23658/84811/2332/55596/55280/10907/24148/55234/6634/22916/221662/6629/3312/9775/6627/153527/220988/55285/8175/10921/7072/55796/55696/51340/27336/27339/4116/79005/6636/26121/10432/10465/84950/9128/8087/25929/10946/10419/11338/3191/8896/9584/10992/22913/9129/29890/55094/79171/1653/60625/51319/6633/6626/22794/79833/51645/9416/1659/8241/56339/51428/…
BP	GO:0000398	mRNA splicing, via spliceosome	221	-0.480275	-2.24054	1e-10	2.71038e-09	1.58696e-09	4486	tags=39%, list=18%, signal=33%	10084/10421/4236/58155/23210/57461/25766/10286/9879/23658/84811/2332/55596/55280/10907/24148/55234/6634/22916/221662/6629/3312/9775/6627/153527/220988/55285/8175/10921/7072/55796/55696/51340/27336/27339/4116/79005/6636/26121/10432/10465/84950/9128/8087/25929/10946/10419/11338/3191/8896/9584/10992/22913/9129/29890/55094/79171/1653/60625/51319/6633/6626/22794/79833/51645/9416/1659/8241/56339/51428/…
BP	GO:0051236	establishment of RNA localization	133	-0.512078	-2.2369	1e-10	2.71038e-09	1.58696e-09	5081	tags=52%, list=20%, signal=42%	8106/26993/3837/23279/9961/9688/54830/10211/55677/80145/65110/56648/8658/2332/29074/1069/81929/22916/7884/29072/23636/23089/220988/6311/84321/6830/59343/10644/9984/79228/7248/8570/10073/9972/10762/55746/2733/3297/348995/65109/56943/29890/23511/11052/8563/26019/10642/25909/7514/10128/23144/65083/8480/23225/57122/4686/9883/9887/79023/1660/10643/79902/23381/11260/5433/57510/9793/9631/23165
CC	GO:0005681	spliceosomal complex	152	-0.501727	-2.23353	1e-10	2.71038e-09	1.58696e-09	4330	tags=42%, list=17%, signal=35%	4236/58155/57461/25766/10286/23658/84811/55596/55280/10907/24148/55234/6634/6629/3312/9775/6627/153527/220988/55285/8175/55696/51340/27336/27339/79706/4116/6636/26121/10465/84950/9128/10946/11338/103/8896/10992/22913/9129/55094/23759/6009/60625/6633/6626/55954/22794/51645/9416/1659/51428/9343/6628/10262/57819/6635/8458/8449/55131/6637/24144/10713/6631/25804
BP	GO:0015931	nucleobase-containing compound transport	182	-0.49008	-2.22435	1e-10	2.71038e-09	1.58696e-09	5081	tags=49%, list=20%, signal=39%	8106/26993/3837/23279/9961/9688/54830/3177/10211/55677/80145/65110/56648/84912/11046/7355/8658/2332/29074/1069/222962/6573/81929/22916/7884/29072/10057/23636/23089/220988/6311/84321/6830/59343/9153/84275/10644/9984/51000/79228/7248/8570/10073/9972/10257/80131/10762/55746/2733/113829/3297/348995/65109/56943/29890/23511/292/11052/8563/26019/10642/25909/55508/7514/10128/23144/2030/60386/65083/8480/3…
BP	GO:0002573	myeloid leukocyte differentiation	193	0.438443	2.22244	1e-10	2.71038e-09	1.58696e-09	4102	tags=39%, list=16%, signal=33%	6422/1230/920/1436/2124/714/3059/975/7048/677/3726/7099/55509/5153/4609/3815/6363/4495/3428/5293/9935/7305/7098/2353/3398/1969/7097/9770/10370/10272/5048/3662/23411/2625/3635/972/139716/11025/3600/6688/4920/7107/10234/25979/3665/29887/5457/8600/1021/325/3725/10538/9855/4067/5295/116071/3565/6348/55294/11006/5925/7189/1051/79705/22904/7124/7071/5663/3593/8111/159296/1385/1236/10202/2242/351
BP	GO:2000147	positive regulation of cell motility	485	0.395496	2.2178	1e-10	2.71038e-09	1.58696e-09	3762	tags=32%, list=15%, signal=28%	10894/6387/4908/7010/1230/5156/84913/64805/10253/2358/1436/5743/2152/3162/63940/147372/6403/2294/388/3554/81704/2113/1398/9510/3082/7048/6352/5641/4780/11170/5880/199/659/4846/1003/728/7099/7057/6369/4609/3815/3553/6366/6363/58494/5649/5293/719/4638/6774/4739/64581/5294/301/56034/3091/10979/729230/1969/2621/80310/1240/57111/54453/1906/9806/3717/5764/7852/22902/596/23411/2625/2268/91663/972/57142/…
BP	GO:0033002	muscle cell proliferation	174	0.445498	2.21764	1e-10	2.71038e-09	1.58696e-09	4915	tags=44%, list=20%, signal=35%	3486/5743/3162/23414/57447/9510/7048/6352/4889/7049/4615/199/659/4846/7099/7057/4609/7043/2627/60485/3398/30008/5739/80310/26281/2081/10370/1906/3717/8837/1027/4313/10413/3600/5728/7472/5031/1535/2773/3725/3488/10672/6909/3569/207/4969/2697/2296/4208/347/57057/4883/59272/3479/7124/284/3593/5724/2771/7520/5292/6934/10891/2006/2047/4331/3248/657/9241/2247/283/5950/3596/93649/55512/3480
BP	GO:0002831	regulation of response to biotic stimulus	314	0.410336	2.21645	1e-10	2.71038e-09	1.58696e-09	3421	tags=33%, list=14%, signal=29%	11326/654/5322/2358/11126/912/11027/11117/1378/3824/11213/1604/2534/1398/2/710/84282/2219/6352/9450/4780/117157/114836/10875/59307/7099/26191/10666/3553/10125/3055/81030/3428/51191/653361/7305/149628/64581/2627/3133/7294/3822/4068/6372/3125/51311/10225/3594/948/4153/26057/79132/55601/9474/2268/54941/7409/3600/3823/6688/3821/5336/3106/10077/58484/3665/23643/384/5359/1535/4938/22933/6397/2213/29800…
MF	GO:0140098	catalytic activity, acting on RNA	274	-0.466613	-2.21207	1e-10	2.71038e-09	1.58696e-09	4522	tags=41%, list=18%, signal=34%	285605/10799/55621/8653/23019/23210/10622/25885/10667/55687/9879/4343/1656/7015/83707/5441/22803/29081/51651/387338/9836/6499/283459/63899/56931/54901/80746/339175/9775/55798/115752/11128/51728/4848/6832/90957/56257/8731/56915/11056/51010/10940/1662/55039/10621/55124/55699/57472/23395/2193/171568/64118/144233/9704/80755/11325/57696/124454/54512/4234/54505/23357/80324/10623/64794/54555/55703/57176…
CC	GO:0045121	membrane raft	304	0.411872	2.21147	1e-10	2.71038e-09	1.58696e-09	4161	tags=37%, list=17%, signal=31%	147/7010/920/5621/5743/1910/1378/3162/5740/1604/51338/2534/7133/695/1398/8631/925/7132/7048/962/10580/2824/148/6442/659/4846/10855/929/10666/3055/2040/55600/7096/3937/3945/28514/5023/3572/7097/356/4118/948/3717/355/6401/8837/3778/3635/285704/91663/4311/7535/107/120892/2149/30846/6386/150696/138715/6506/684/914/9495/5359/477/3753/2773/79054/973/3689/11160/5348/4067/23673/25999/5175/8692/3932/3741/…
BP	GO:0000375	RNA splicing, via transesterification reactions	225	-0.472852	-2.2112	1e-10	2.71038e-09	1.58696e-09	4486	tags=39%, list=18%, signal=32%	10084/10421/4236/58155/23210/57461/25766/10286/9879/23658/84811/2332/55596/55280/10907/24148/55234/6634/22916/221662/6629/3312/9775/6627/153527/220988/55285/8175/10921/7072/55796/55696/51340/27336/27339/8570/4116/79005/6636/26121/10432/10465/84950/9128/8087/25929/10946/10419/11338/3191/8896/9584/10992/22913/9129/29890/55094/79171/1653/60625/51319/6633/6626/22794/79833/51645/9416/1659/8241/56339/5…
CC	GO:0098857	membrane microdomain	305	0.410723	2.21074	1e-10	2.71038e-09	1.58696e-09	4161	tags=36%, list=17%, signal=31%	147/7010/920/5621/5743/1910/1378/3162/5740/1604/51338/2534/7133/695/1398/8631/925/7132/7048/962/10580/2824/148/6442/659/4846/10855/929/10666/3055/2040/55600/7096/3937/3945/28514/5023/3572/7097/356/4118/948/3717/355/6401/8837/3778/3635/285704/91663/4311/7535/107/120892/2149/30846/6386/150696/138715/6506/684/914/9495/5359/477/3753/2773/79054/973/3689/11160/5348/4067/23673/25999/5175/8692/3932/3741/…
BP	GO:0040017	positive regulation of locomotion	499	0.392371	2.20666	1e-10	2.71038e-09	1.58696e-09	3762	tags=32%, list=15%, signal=27%	10894/6387/4908/7010/1230/5156/84913/64805/10253/2358/1436/5743/2152/3162/63940/147372/6403/2294/388/3554/81704/2113/1398/9510/3082/7048/6352/5641/4780/11170/5880/199/659/4846/1003/728/7099/7057/6369/4609/3815/3553/6366/6363/58494/5649/5293/719/4638/6774/4739/64581/5294/301/56034/3091/10979/729230/1969/2621/80310/9353/3603/1240/57111/54453/1906/9806/3717/5764/7852/22902/596/23411/2625/2268/91663/…
CC	GO:0043235	receptor complex	389	0.400843	2.20119	1e-10	2.71038e-09	1.58696e-09	4958	tags=35%, list=20%, signal=28%	7433/3680/3977/7010/5156/2675/2022/558/920/10148/8809/1436/11117/3824/5787/4306/8807/7133/269/2568/8631/925/94/7132/7048/10268/5799/3357/7049/659/10461/7099/919/929/3815/3568/55600/92/7075/1441/4035/3560/7096/2042/567/9971/960/3822/2059/1969/55584/3572/7097/2690/3594/50852/948/3681/3717/22925/972/7535/4982/4920/3821/6386/55507/915/2322/7436/10077/3598/23643/916/2674/3953/973/3689/4067/3569/8516/5…
BP	GO:0034612	response to tumor necrosis factor	217	0.423659	2.18932	1e-10	2.71038e-09	1.58696e-09	4477	tags=41%, list=18%, signal=34%	1393/6368/6422/6359/11093/83643/5743/7133/7132/7538/6352/4780/677/10365/57817/6347/7057/6369/929/6366/6363/834/608/678/2950/820/9971/2621/2167/10673/388372/1906/3717/355/4824/5609/5105/6095/6401/2643/23411/2625/3476/414062/445/28512/796/58191/8600/1535/5516/255743/7805/2819/7412/8692/207/1540/6349/6348/10670/4155/6850/7189/9447/6609/4790/2185/3037/27242/335/7124/6362/6357/10594/2635/5106/6517/355…
BP	GO:0051272	positive regulation of cellular component movement	495	0.389172	2.18728	1e-10	2.71038e-09	1.58696e-09	3762	tags=32%, list=15%, signal=28%	10894/6387/4908/7010/1230/5156/9638/84913/64805/10253/2358/1436/5743/2152/3162/63940/147372/6403/2294/388/3554/81704/2113/1398/9510/3082/7048/6352/5641/4780/11170/5880/199/659/4846/1003/728/7099/7057/6369/4609/3815/3553/6366/6363/58494/5649/5293/719/4638/6774/4739/64581/5294/301/56034/3091/10979/729230/1969/2621/80310/1240/57111/54453/1906/9806/3717/5764/7852/22902/596/23411/2625/2268/91663/972/5…
BP	GO:0010632	regulation of epithelial cell migration	212	0.425698	2.18301	1e-10	2.71038e-09	1.58696e-09	3691	tags=33%, list=15%, signal=29%	2658/7010/1634/6915/84913/5547/5743/3162/147372/388/2113/9314/94/7048/4070/5641/4780/659/4846/7057/5293/5294/301/3091/1969/9353/57111/54453/1906/5764/23411/2625/57142/54566/5728/5336/6237/57381/7424/23328/306/5176/64094/3725/4163/207/64218/10982/3565/5797/1793/6678/8829/168667/55294/9734/4208/411/3640/2752/27286/2185/2255/3037/3690/7124/284/4204/1647/5606/10013
BP	GO:2000146	negative regulation of cell motility	251	0.414858	2.17265	1e-10	2.71038e-09	1.58696e-09	3578	tags=31%, list=14%, signal=27%	6387/2658/11314/6422/2022/1634/6915/1602/4092/3486/140/653/11117/3162/8434/127435/114757/5734/388/8519/1398/9314/22998/94/4804/4070/4780/199/90102/6347/7057/6366/7075/4035/6774/9353/8646/10370/7454/596/25932/2625/972/104/9104/63923/5728/2841/684/3084/6237/10653/7122/5176/7481/3488/10672/4163/8692/397/207/57406/2697/3565/5797/9901/482/56940/4208/10076/347/79890/54361/1809/7124/1265/4204/1843/1647
BP	GO:0051052	regulation of DNA metabolic process	375	-0.440622	-2.15968	1e-10	2.71038e-09	1.58696e-09	4870	tags=41%, list=19%, signal=34%	84083/5514/10111/5155/5884/3776/2140/3320/51720/2072/6742/56154/1950/10694/25913/65057/8091/7486/26272/64110/4292/6714/51750/5558/81931/55929/8658/25792/10856/80174/1763/7913/23244/5515/5429/146059/29072/225689/51366/1676/581/9025/4798/10574/60/3060/5111/6830/7027/59343/54799/51010/8550/29844/7270/79913/5982/10576/7158/84501/7398/9984/10459/10919/51053/7335/4216/23560/7037/2264/55226/4968/79075/5…
BP	GO:0008380	RNA splicing	306	-0.44902	-2.1595	1e-10	2.71038e-09	1.58696e-09	4486	tags=38%, list=18%, signal=32%	10084/55677/10421/10915/80145/4236/58155/23210/57461/25766/284695/378950/10137/10286/9879/23658/84811/83707/2332/55596/22985/55280/10907/24148/55234/6634/5515/22916/221662/6629/3312/80746/9775/6627/153527/220988/84321/1196/6830/55285/8175/10921/7072/55796/64121/55696/51340/27336/23076/9984/27339/79706/79228/8570/4116/79005/6636/26121/10432/10465/84950/9128/8087/25929/10946/10419/11338/3191/8896/9…
BP	GO:0051480	regulation of cytosolic calcium ion concentration	313	0.400412	2.15948	1e-10	2.71038e-09	1.58696e-09	4958	tags=35%, list=20%, signal=29%	147/1230/5156/114897/6915/5732/2357/133/2358/5621/8477/1910/185/1193/1604/5734/2534/10268/1902/148/3357/2359/2099/10663/728/10800/387129/6366/6363/5144/719/5294/729230/5739/3270/5023/116/55584/126306/60675/1240/356/27334/948/1906/3717/7852/5729/596/9474/6622/2946/952/11151/5311/2149/5336/2841/59341/1043/796/477/5031/1535/2056/79608/10672/5020/4067/55503/3932/3741/287/2833/27020/9446/5788/4308/634…
BP	GO:0051271	negative regulation of cellular component movement	259	0.408119	2.15484	1e-10	2.71038e-09	1.58696e-09	3578	tags=31%, list=14%, signal=27%	6387/2658/11314/6422/2022/1634/6915/1602/4092/3486/140/653/11117/3162/8434/127435/114757/5734/388/8519/1398/9314/22998/94/4804/4070/4780/7049/199/90102/6347/7057/6366/7075/4035/6774/9353/8646/10370/7454/596/25932/2625/972/1027/104/9104/63923/5728/2841/684/3084/6237/10653/7122/5176/7481/3488/10672/4163/8692/397/207/57406/2697/3565/5797/9901/482/56940/4208/10076/347/79890/54361/1809/7124/1265/4204/…
BP	GO:0006325	chromatin organization	417	-0.433898	-2.15322	1e-10	2.71038e-09	1.58696e-09	3468	tags=33%, list=14%, signal=29%	22955/6015/346171/10664/8841/55870/146059/29072/50809/6827/25942/4017/7862/10363/23421/79711/10927/8312/9025/8289/4798/29104/60/91133/56254/8815/79885/4676/83439/29855/6830/6749/54799/29844/3170/9810/26609/55193/4602/79913/11164/10336/57798/8535/222229/10919/6599/11011/51742/9219/3065/171023/57680/9739/26147/23198/10902/1108/1017/63925/8314/10419/83746/6601/51535/64754/84733/56943/5933/10155/4678…
BP	GO:0034660	ncRNA metabolic process	408	-0.434566	-2.15047	1e-10	2.71038e-09	1.58696e-09	6201	tags=48%, list=25%, signal=37%	2972/79042/4613/285381/80745/54853/7157/55511/27340/23369/23016/84128/84135/8468/23195/4137/79707/2068/55272/25983/10360/126668/6741/84172/55636/112970/54663/79922/23264/2091/9014/11180/24140/10436/10056/285605/2971/55011/10799/23160/55621/10969/51002/51096/6949/26610/23223/6617/10607/10667/55687/285855/5605/7015/163589/83707/5441/22803/55596/51018/6227/23212/23481/285367/9330/389421/10438/29081/…
BP	GO:0032102	negative regulation of response to external stimulus	356	0.393332	2.14899	1e-10	2.71038e-09	1.58696e-09	5326	tags=40%, list=21%, signal=32%	11326/7010/5156/114897/8530/2358/22915/11027/1378/284207/5740/3824/11213/5734/2294/2534/7133/1398/9314/7056/2/3082/7132/313/7538/710/9021/4889/10875/199/59307/57817/90102/4846/1003/6347/7057/114548/583/3055/5627/3428/2950/9971/89790/3133/9353/58189/10225/2160/1906/64838/6095/79132/9474/2625/2268/54941/8993/3821/79626/5728/2841/3106/240/135/384/5327/4938/325/22933/6397/2213/3134/5176/4067/10507/84…
BP	GO:1903706	regulation of hemopoiesis	320	0.398034	2.14753	1e-10	2.71038e-09	1.58696e-09	3504	tags=32%, list=14%, signal=28%	6422/1230/558/10288/920/4092/1378/2124/714/695/2113/3059/7048/7538/3142/942/677/10875/864/7099/639/4609/114548/6363/10125/9935/3575/92/1441/7305/7098/567/2353/678/6774/301/3091/28514/3398/729230/2621/939/9770/3594/5764/2736/10272/5105/3662/2737/2625/3635/972/7704/7535/8993/11025/3600/6688/4920/7107/10234/3106/914/3665/5457/8600/1021/325/2213/3122/3111/3707/4067/5295/115352/3566/3565/5788/84695/60…
BP	GO:0030336	negative regulation of cell migration	239	0.409858	2.14515	1e-10	2.71038e-09	1.58696e-09	3578	tags=31%, list=14%, signal=27%	6387/2658/11314/6422/2022/1634/6915/1602/4092/3486/140/653/11117/3162/8434/127435/114757/5734/388/8519/9314/22998/94/4804/4070/4780/199/90102/6347/7057/6366/7075/4035/6774/9353/8646/10370/596/25932/972/104/63923/5728/2841/684/3084/6237/7122/5176/7481/3488/10672/4163/8692/397/207/57406/2697/3565/5797/9901/482/56940/4208/10076/347/79890/54361/1809/7124/1265/4204/1843/1647
CC	GO:0030667	secretory granule membrane	281	0.402544	2.1441	1e-10	2.71038e-09	1.58696e-09	3641	tags=31%, list=14%, signal=27%	11314/1621/10288/2357/2358/5547/160364/1378/945/6403/5787/1604/79895/7133/57153/8826/27180/5799/64518/728/762/929/1536/2207/2040/143425/148229/6402/719/7305/6844/2212/6515/960/6793/5023/310/374403/7097/11010/948/968/6622/4311/2215/952/11025/9749/961/963/11026/5066/3106/684/11031/5870/8773/3136/547/1535/22931/3689/84329/54918/5175/55754/140885/3958/5788/6678/967/51552/8987/10788/391/5660/6556/2600…
BP	GO:0044282	small molecule catabolic process	343	0.391397	2.13311	1e-10	2.71038e-09	1.58696e-09	5084	tags=43%, list=20%, signal=35%	3101/51302/2530/8074/2639/4846/51166/127/64064/1576/443/51380/3242/23417/217/4942/4329/56898/8529/1592/54511/27284/3067/6999/84693/10157/5105/2110/128/594/37/8867/3176/84129/219/2098/2954/8564/8604/27165/5728/6898/64577/384/197257/60496/1806/3155/3712/4143/1036/10449/549/132789/30/6470/200316/1543/60489/1593/207/55862/5860/33/3033/83752/54363/35/2746/137872/1376/66002/2875/144193/1962/18/2752/271…
MF	GO:0005126	cytokine receptor binding	244	0.40361	2.1231	1e-10	2.71038e-09	1.58696e-09	3504	tags=29%, list=14%, signal=25%	1893/6387/6368/4908/4091/3977/2022/6359/10148/4092/9547/7837/7048/6352/8835/7049/8742/4615/65997/1003/6347/6369/3553/4803/6366/6363/7043/10979/729230/6372/3572/10673/356/388372/3594/3717/8837/2625/3600/2920/6386/414062/58191/8600/7424/2056/959/10464/3716/3445/5295/3569/3565/6349/6348/58533/1489/9958/944/6850/7189/10019/3690/3556/54106/9180/7124/6362/3593/3574/3456
BP	GO:0042254	ribosome biogenesis	231	-0.454142	-2.12073	1e-10	2.71038e-09	1.58696e-09	6040	tags=50%, list=24%, signal=39%	27340/3921/23016/84128/84135/23195/6175/79707/2068/55272/29889/25983/10360/55636/54663/79922/64979/2091/85865/10436/2971/55011/10799/23160/10969/51096/29093/23223/51121/10607/51335/285855/51081/22803/51018/6227/23212/23481/285367/90441/10438/29081/79050/10813/10885/387338/29777/6201/63899/65095/92856/9775/9790/56915/11056/51010/8450/1662/55027/64434/26609/51154/55003/23076/6128/23246/9136/55813/6…
BP	GO:0007162	negative regulation of cell adhesion	258	0.40043	2.11737	1e-10	2.71038e-09	1.58696e-09	3695	tags=34%, list=15%, signal=29%	6387/339390/11326/11314/114897/654/10288/4092/5621/1378/6441/1511/9314/94/3142/4070/942/10875/11170/864/90102/26191/7057/2615/6366/301/80709/79679/54900/80380/3717/2737/91663/972/4313/9404/6688/79626/5728/59341/445/135/10653/384/2213/57045/7805/10507/84868/5295/397/207/83700/3566/3565/3958/5788/84695/604/3659/53827/8379/3902/11006/56940/18/4155/6591/5340/347/10019/1051/80139/2048/941/5598/27242/3…
BP	GO:0050878	regulation of body fluid levels	354	0.387686	2.11218	1e-10	2.71038e-09	1.58696e-09	4227	tags=33%, list=17%, signal=28%	5156/114897/558/6915/64805/11093/133/22915/2152/1910/7980/3043/6403/1511/7056/710/8835/4780/9060/10461/4846/7099/7057/10855/3083/4778/4939/375033/2207/5627/1080/5294/3091/7294/5023/2621/8529/3572/5051/11234/653145/948/2160/1906/3717/7454/5341/9474/2158/7409/595/2149/640/2159/5336/5066/11215/59341/10077/135/5327/5359/10544/1535/959/1036/7450/10672/5020/4067/5588/8692/3569/3932/10451/8858/1606/2697…
BP	GO:0009410	response to xenobiotic stimulus	386	0.384673	2.11188	1e-10	2.71038e-09	1.58696e-09	4101	tags=35%, list=16%, signal=30%	1393/6422/2327/2022/6915/5621/1571/5743/3162/113612/4837/969/10/1544/7048/6283/148/2947/4780/3357/5142/316/7057/4609/54658/3553/54657/1536/2354/1576/10628/7098/2353/2950/2627/4255/1559/284996/8321/2621/8529/7039/1592/10249/7054/27284/1555/1906/2180/7852/4824/6095/596/9474/847/8061/2625/1027/6622/2946/952/4313/23492/107/595/4982/1848/7079/5066/6506/445/1549/135/4129/9/3485/1558/7424/1535/54659/156…
BP	GO:0044770	cell cycle phase transition	443	-0.422412	-2.1034	1e-10	2.71038e-09	1.58696e-09	4492	tags=38%, list=18%, signal=32%	7465/5426/808/51720/283807/5017/6683/27133/8091/10537/26272/7332/128239/252983/1642/261726/51343/134353/7015/10385/23236/571/80198/80174/1763/11200/7023/5515/6868/10116/25942/225689/56658/57663/4193/55198/1977/84861/7027/59343/56257/348654/131405/6873/8450/1978/26233/7158/4296/9984/10459/27339/55920/1104/5537/79968/1030/1981/65123/51400/91/1017/701/84936/5933/55835/4436/54962/4678/64682/51547/839…
MF	GO:0140657	ATP-dependent activity	471	-0.418354	-2.09558	1e-10	2.71038e-09	1.58696e-09	4286	tags=35%, list=17%, signal=30%	6683/4620/10694/27032/7486/79572/89845/23250/8735/9361/5704/2186/5706/5190/4292/51750/9879/4343/1656/8714/22836/22985/27030/3309/1778/10856/529/1763/481/9931/90423/83858/23046/3799/11104/64446/491/6499/10057/523/5205/3312/9775/3304/10101/10079/374868/10574/6832/90957/90990/55210/11056/4637/11194/79029/1662/27127/5982/10576/10808/9704/11325/57696/57680/10257/5702/80179/54505/79075/50485/4905/10939…
BP	GO:0090132	epithelium migration	277	0.392476	2.08996	1e-10	2.71038e-09	1.58696e-09	3691	tags=31%, list=15%, signal=26%	2658/7010/1634/6915/84913/9839/23500/5547/5743/3162/147372/3397/388/2113/9314/94/7048/4070/5641/4780/8742/659/4846/1003/7057/3815/5293/5294/301/3091/1969/9353/57111/54453/1906/5764/23411/2625/57142/9404/3164/54566/161198/5728/5336/6237/57381/7424/23328/306/5176/64094/3725/4163/207/64218/10982/3565/5797/1793/6678/8829/11167/168667/55294/9734/4208/411/3640/2752/27286/2185/5613/2255/3037/79977/3690/…
BP	GO:0140694	non-membrane-bounded organelle assembly	312	-0.434099	-2.08941	1e-10	2.71038e-09	1.58696e-09	3964	tags=34%, list=16%, signal=29%	51335/4292/6714/79643/1656/55125/51081/7984/51657/8658/1778/1069/23212/11200/79959/2886/8841/2801/225689/29777/3304/23636/4733/6311/4848/90990/7072/124093/88/57472/26609/51154/55839/6128/51804/56890/23246/1453/64963/550/1104/10432/5601/54505/1017/8994/3796/9898/22995/55835/11273/84231/55722/4703/27229/203068/113622/23126/163786/7756/22907/57647/3692/7429/26284/10274/140801/9371/7840/54915/10403/6…
BP	GO:0010631	epithelial cell migration	275	0.391967	2.08616	1e-10	2.71038e-09	1.58696e-09	3691	tags=31%, list=15%, signal=26%	2658/7010/1634/6915/84913/9839/23500/5547/5743/3162/147372/3397/388/2113/9314/94/7048/4070/5641/4780/8742/659/4846/1003/7057/3815/5293/5294/301/3091/1969/9353/57111/54453/1906/5764/23411/2625/57142/9404/3164/54566/161198/5728/5336/6237/57381/7424/23328/306/5176/64094/3725/4163/207/64218/10982/3565/5797/1793/6678/8829/11167/168667/55294/9734/4208/411/3640/2752/27286/2185/5613/2255/3037/3690/335/71…
BP	GO:0090130	tissue migration	282	0.390223	2.08052	1e-10	2.71038e-09	1.58696e-09	3691	tags=30%, list=15%, signal=26%	2658/7010/1634/6915/84913/9839/23500/5547/5743/3162/147372/3397/2294/388/2113/9314/94/7048/4070/5641/4780/8742/659/4846/1003/7057/3815/5293/5294/301/3091/1969/9353/57111/54453/1906/5764/23411/2625/57142/9404/3164/54566/161198/5728/5336/6237/57381/7424/23328/306/5176/64094/3725/4163/207/64218/10982/3565/5797/1793/6678/8829/11167/168667/55294/9734/4208/411/3640/2752/27286/2185/5613/2255/3037/79977/…
BP	GO:1901987	regulation of cell cycle phase transition	334	-0.428889	-2.07768	1e-10	2.71038e-09	1.58696e-09	3901	tags=36%, list=16%, signal=31%	252983/1642/261726/51343/134353/7015/10385/23236/80198/80174/1763/11200/7023/5515/6868/10116/25942/225689/56658/4193/55198/84861/7027/59343/56257/348654/8450/7158/9984/10459/27339/55920/79968/1030/1981/65123/1017/701/84936/5933/55835/4436/54962/83990/80279/9656/4221/8563/328/11073/5889/1019/163786/5883/51433/7756/8317/9183/25896/51434/2071/5885/57504/57551/286053/84126/993/51692/55159/9700/7517/1…
CC	GO:0030139	endocytic vesicle	320	0.384691	2.07554	1e-10	2.71038e-09	1.58696e-09	3531	tags=32%, list=14%, signal=28%	8685/9332/55576/219972/920/5322/3040/3043/6441/115677/6456/1902/23166/55647/5880/4846/1520/51762/4481/1536/143425/3575/1441/4035/83547/653361/7096/6844/567/1080/3133/2934/7039/7097/3125/54453/4689/10435/948/7454/9482/9474/972/7431/8993/11151/30846/4920/915/3106/6504/3115/4353/11031/8773/816/3136/9367/3113/8291/10618/1535/3122/3134/306/3117/84329/4067/23673/311/3240/8692/55788/30845/6678/3949/9135…
BP	GO:0030198	extracellular matrix organization	281	0.389224	2.07316	1e-10	2.71038e-09	1.58696e-09	4893	tags=36%, list=19%, signal=29%	10516/5156/2022/9509/11093/9719/4239/1805/57188/59277/11117/8434/2294/1511/7133/7837/83716/9510/7132/2824/1842/5768/8510/90102/1520/7075/4035/2331/1471/91522/165/30008/4060/2621/5033/59350/7373/9806/25890/1285/8837/1286/4327/4313/4982/7177/649/84168/10653/6624/55790/255743/3913/64094/3569/10491/8516/2296/4316/81621/84695/7092/64116/5925/7146/5340/11095/55959/1308/3037/4016/1361/7124/1296/2199/175…
BP	GO:0010948	negative regulation of cell cycle process	236	-0.441042	-2.06665	1e-10	2.71038e-09	1.58696e-09	2150	tags=29%, list=9%, signal=27%	7158/9984/10459/56890/27339/10432/79968/1030/65123/1017/701/84936/5933/4436/54962/83990/80279/9656/4221/8563/11073/9031/79733/5883/7756/9183/25896/5885/57551/84126/55159/9700/7517/1386/990/10403/27085/146956/29980/26271/5591/51514/60561/835/55755/672/55055/4591/9735/144455/4085/1111/81620/11130/9319/51512/2177/899/4751/641/1063/8914/286151/699/891/9212/9232/7272/2146
BP	GO:0034470	ncRNA processing	311	-0.429383	-2.06589	1e-10	2.71038e-09	1.58696e-09	6469	tags=50%, list=26%, signal=37%	54487/9698/9612/55656/10775/79042/4613/285381/80745/54853/7157/55511/27340/23369/23016/84128/84135/23195/79707/2068/55272/25983/10360/6741/55636/112970/54663/79922/23264/2091/11180/24140/10436/285605/55011/10799/23160/55621/10969/51002/51096/26610/23223/10607/10667/55687/285855/5605/7015/83707/22803/55596/51018/6227/23212/23481/285367/389421/10438/29081/79050/10813/10885/387338/29777/9836/6201/63…
BP	GO:0043062	extracellular structure organization	282	0.38747	2.06584	1e-10	2.71038e-09	1.58696e-09	4893	tags=35%, list=19%, signal=29%	10516/5156/2022/9509/11093/9719/4239/1805/57188/59277/11117/8434/2294/1511/7133/7837/83716/9510/7132/2824/1842/5768/8510/90102/1520/7075/4035/2331/1471/91522/165/30008/4060/2621/5033/59350/7373/9806/25890/1285/8837/1286/4327/4313/4982/7177/649/84168/10653/6624/55790/255743/3913/64094/3569/10491/8516/2296/4316/81621/84695/7092/64116/5925/7146/5340/11095/55959/1308/3037/4016/1361/7124/1296/2199/175…
BP	GO:0044772	mitotic cell cycle phase transition	363	-0.421241	-2.05852	1e-10	2.71038e-09	1.58696e-09	2724	tags=31%, list=11%, signal=28%	55198/1977/84861/7027/59343/56257/348654/131405/6873/8450/1978/26233/10459/55920/1104/5537/1030/1981/65123/51400/91/1017/701/84936/5933/55835/4678/64682/51547/80279/328/11073/1871/5889/9088/1019/163786/84930/51433/57695/5932/7756/8317/9183/51434/2071/5885/1876/57504/57551/286053/993/51692/10460/55159/9700/7517/10197/1163/990/8453/10403/27085/29980/898/995/26271/5591/51514/6502/60561/835/55755/672…
BP	GO:0040013	negative regulation of locomotion	285	0.386067	2.05765	1e-10	2.71038e-09	1.58696e-09	3616	tags=29%, list=14%, signal=26%	6387/2658/11314/6422/2022/1634/6915/1602/4092/3486/140/653/11117/3162/8434/127435/114757/5734/388/8519/1398/9314/22998/94/4804/4070/4780/199/90102/6347/7057/6366/7075/4035/6774/9353/8646/10370/7454/596/25932/2625/972/104/9104/63923/5728/2841/684/3084/135/6237/10653/7122/5176/7481/3488/10672/4163/10507/8692/397/207/57406/2697/64218/3565/5797/9901/8829/482/56940/4208/10076/347/79890/54361/1809/7124…
BP	GO:0072507	divalent inorganic cation homeostasis	453	0.367357	2.05548	1e-10	2.71038e-09	1.58696e-09	4041	tags=30%, list=16%, signal=25%	6387/6368/147/1230/5156/114897/6359/6915/5732/2357/4502/133/2358/5621/8477/1910/185/1193/288/4489/4493/1604/4501/5734/4499/4494/2534/6279/10268/1902/7178/9709/6352/148/3357/2359/2099/10663/1003/728/10800/387129/6366/6363/4495/5144/719/5294/729230/5739/3270/5023/116/55584/126306/60675/1240/356/27334/948/1906/3717/7852/5729/596/9474/6622/2946/952/11151/4496/5311/6280/6444/2149/9104/5336/2841/59341/…
BP	GO:0072503	cellular divalent inorganic cation homeostasis	434	0.369624	2.05448	1e-10	2.71038e-09	1.58696e-09	4958	tags=34%, list=20%, signal=28%	6387/6368/147/1230/5156/114897/6359/6915/5732/2357/4502/133/2358/5621/8477/1910/185/1193/4489/4493/1604/4501/5734/4499/4494/2534/6279/10268/1902/7178/9709/6352/148/3357/2359/2099/10663/1003/728/10800/387129/6366/6363/4495/5144/719/5294/729230/5739/3270/5023/116/55584/126306/60675/1240/356/27334/948/1906/3717/7852/5729/596/9474/6622/2946/952/11151/4496/5311/6280/2149/9104/5336/2841/59341/1043/796/…
BP	GO:0010038	response to metal ion	333	0.377784	2.0514	1e-10	2.71038e-09	1.58696e-09	5100	tags=40%, list=20%, signal=32%	1393/654/11093/4502/5621/5743/3162/288/4489/4493/4501/2395/4499/79901/4494/1544/6279/8826/30061/5641/4780/27345/57817/3726/8074/3931/7057/929/3815/1536/4495/143425/2354/10628/653361/567/10235/2353/10243/3091/2167/7054/83849/1906/366/596/3778/25932/9474/847/1027/6622/4496/107/5311/595/4982/120892/284111/8604/6649/5336/5066/5530/445/6898/4129/84557/3485/5359/241/113/5516/9451/3707/84329/5176/3725/3…
BP	GO:0001503	ossification	369	0.37379	2.0367	1e-10	2.71038e-09	1.58696e-09	3440	tags=30%, list=14%, signal=26%	1893/2658/6422/4091/1230/7123/654/4092/9464/653/5743/5552/3399/5734/1052/8519/3082/6320/249/2824/22856/3726/659/8074/51119/864/2274/51232/7043/92/340419/3091/10979/1969/8321/3572/9770/8646/5764/2736/10272/596/847/2737/2268/6096/1291/7704/4313/26578/10413/202151/6615/4920/8313/202018/3199/649/3400/63923/285313/240/79176/796/29887/4958/8600/1021/7424/55790/255743/9562/9451/9249/9970/57045/7481/3488…
BP	GO:0000226	microtubule cytoskeleton organization	480	-0.404	-2.02918	1e-10	2.71038e-09	1.58696e-09	4504	tags=35%, list=18%, signal=29%	667/7465/51364/84327/10579/80258/84612/158135/440270/6683/84942/7278/8409/50487/7846/7280/1605/55036/79998/4292/23380/79643/55125/5902/9857/1641/85440/8658/1778/57704/51199/1069/11200/79959/8841/11104/29072/2801/64446/225689/2011/27175/10540/3996/54875/6566/8312/3304/23636/4733/27019/284076/4134/9576/348654/90990/124093/10297/8851/10726/84501/10300/56890/4957/1453/100506658/28964/23291/11190/2743…
BP	GO:0008015	blood circulation	465	0.359765	2.01383	1e-10	2.71038e-09	1.58696e-09	4409	tags=31%, list=18%, signal=26%	5138/6387/147/7010/1621/654/6915/4092/133/140/6916/5547/5743/1910/3162/185/1193/3043/3764/1511/4634/6456/94/710/148/3357/5142/10365/27345/659/4846/1003/6324/10800/5144/719/10060/5294/2034/2627/28514/3398/9424/10979/3270/5023/2621/2934/9353/8529/5999/7054/1359/1906/3717/1285/7852/342527/2643/3778/9474/128/2946/952/4313/5997/3212/2028/6196/6444/2149/6296/6649/59341/2642/135/796/5443/477/7122/3753/1…
BP	GO:0018108	peptidyl-tyrosine phosphorylation	346	0.366382	1.99656	1e-10	2.71038e-09	1.58696e-09	3448	tags=30%, list=14%, signal=27%	4908/11314/6422/7010/5156/353514/558/654/920/5621/1436/64092/2534/695/3059/975/3082/7132/9021/6352/148/10461/3702/3815/3055/5649/7075/653361/2042/4750/4739/64581/56034/960/7294/1969/1195/2621/80310/4145/3572/7039/2690/9467/948/3717/5609/2268/972/7535/3600/4920/84619/2322/640/5336/6416/3084/285489/916/660/2056/2674/10464/3689/3716/2202/4067/10507/5175/8692/3569/3932/3565/5788/8829/55294/11006/5853…
BP	GO:0050673	epithelial cell proliferation	364	0.36425	1.99289	1e-10	2.71038e-09	1.58696e-09	3421	tags=30%, list=14%, signal=26%	1893/6387/2658/6422/7010/654/84913/653/2152/1910/3162/185/3397/3082/94/7538/4804/4070/3357/677/7049/8742/2099/659/864/728/6347/7057/26051/51092/6369/4609/3815/5293/92/7075/567/6774/3091/60485/3398/1969/60675/7039/2081/55081/1285/5764/4824/8837/23411/2625/1027/57142/10413/595/3164/687/9104/5728/240/7472/1028/8600/1021/80173/7424/1535/3487/64919/5176/3725/3488/4163/6899/27152/6909/3569/207/49860/15…
BP	GO:0006874	cellular calcium ion homeostasis	398	0.360628	1.98672	1e-10	2.71038e-09	1.58696e-09	4958	tags=33%, list=20%, signal=27%	6387/6368/147/1230/5156/114897/6359/6915/5732/2357/133/2358/5621/8477/1910/185/1193/1604/5734/2534/10268/1902/7178/9709/6352/148/3357/2359/2099/10663/1003/728/10800/387129/6366/6363/5144/719/5294/729230/5739/3270/5023/116/55584/126306/60675/1240/356/27334/948/1906/3717/7852/5729/596/9474/6622/2946/952/11151/5311/2149/9104/5336/2841/59341/1043/796/477/5031/1535/2056/309/79054/79608/10672/5020/4067…
BP	GO:0018212	peptidyl-tyrosine modification	349	0.36296	1.97989	1e-10	2.71038e-09	1.58696e-09	3448	tags=30%, list=14%, signal=26%	4908/11314/6422/7010/5156/353514/558/654/920/5621/1436/64092/2534/695/3059/975/3082/7132/9021/6352/148/10461/3702/3815/3055/5649/7075/653361/2042/4750/4739/64581/56034/960/7294/1969/1195/2621/80310/4145/3572/7039/2690/9467/948/3717/5609/2268/972/7535/3600/4920/84619/2322/640/5336/6416/3084/285489/916/660/2056/2674/10464/3689/3716/2202/4067/10507/5175/8692/3569/3932/3565/5788/8829/55294/11006/5853…
BP	GO:0055074	calcium ion homeostasis	410	0.359431	1.97715	1e-10	2.71038e-09	1.58696e-09	4958	tags=33%, list=20%, signal=27%	6387/6368/147/1230/5156/114897/6359/6915/5732/2357/133/2358/5621/8477/1910/185/1193/1604/5734/2534/10268/1902/7178/9709/6352/148/3357/2359/2099/10663/1003/728/10800/387129/6366/6363/5144/719/5294/729230/5739/3270/5023/116/55584/126306/60675/1240/356/27334/948/1906/3717/7852/5729/596/9474/6622/2946/952/11151/5311/6444/2149/9104/5336/2841/59341/1043/796/29887/477/8600/5031/1535/2056/309/79054/79608…
BP	GO:0006631	fatty acid metabolic process	351	0.361596	1.97595	1e-10	2.71038e-09	1.58696e-09	4640	tags=37%, list=18%, signal=30%	2687/5322/6916/1571/5743/5740/113612/114757/1544/5166/7132/313/51703/2639/127/3553/1576/23417/4056/2950/301/9611/56898/1559/51141/8529/10613/7054/79966/1555/948/1906/2180/84693/5105/2110/23411/641372/128/972/6622/2946/37/84129/6296/84869/5730/9104/5066/2170/240/641371/1549/10998/241/376497/1558/3712/51084/10449/549/1565/10464/30/55301/11160/1543/84266/207/55862/57406/158584/33/148811/5447/3033/83…
BP	GO:0010817	regulation of hormone levels	453	0.351674	1.96773	1e-10	2.71038e-09	1.58696e-09	4474	tags=31%, list=18%, signal=26%	1393/6422/5156/114897/654/133/9227/653/1910/185/125/1511/5947/695/1544/8425/6352/5799/23428/9060/2099/8074/51762/51092/5959/220/415116/127/54658/3553/143425/1576/1080/301/3091/9971/124/27122/1559/116/1592/27284/2690/1359/1906/3717/4824/83875/2625/54884/952/1508/2028/10170/8608/640/59341/5530/9501/240/81555/130/8773/64577/5443/84976/1558/10599/8600/54659/25924/126/1565/9249/6567/590/4067/25976/555…
BP	GO:0007346	regulation of mitotic cell cycle	398	-0.39622	-1.95356	1e-10	2.71038e-09	1.58696e-09	3866	tags=33%, list=15%, signal=29%	1642/51343/134353/7015/10385/23236/80198/80174/10201/255324/11200/7023/5515/6868/25942/56658/1761/23170/4193/23636/55198/1977/84861/7027/59343/56257/348654/8450/1978/6119/10459/51053/55920/1104/1030/1981/65123/1017/10419/3297/701/84936/5933/150465/55835/4436/54962/9820/80279/9656/10269/328/11073/5889/9088/1019/163786/3209/26574/5883/51433/7756/8317/3169/9183/51434/2071/5885/57504/57551/286053/908…
BP	GO:1901615	organic hydroxy compound metabolic process	492	0.345201	1.937	1e-10	2.71038e-09	1.58696e-09	4648	tags=35%, list=18%, signal=29%	1621/654/9839/9464/9227/653/1571/1910/9023/1071/51302/125/5360/1544/249/5641/319/8074/3931/4061/5959/220/5153/127/3815/54657/9517/1576/217/3945/114876/1080/114879/2034/3091/9971/124/27122/1559/27010/51141/8529/1592/10613/7054/27284/3067/80168/5105/2643/596/434/8720/5341/5805/847/23411/2625/128/54884/6622/1312/37/1508/25987/10170/8867/6615/219/8608/84869/8604/7436/5728/5336/3988/130/10998/4129/197…
BP	GO:0010035	response to inorganic substance	488	0.345627	1.93384	1e-10	2.71038e-09	1.58696e-09	3098	tags=28%, list=12%, signal=25%	1393/10516/558/654/11093/4502/5621/1571/5743/1910/3162/3040/288/2308/3043/4489/4493/4501/388/2395/4499/79901/4494/2534/1398/54407/1544/3082/6279/8826/30061/5641/4780/10365/27345/57817/3726/8074/4846/3931/7057/929/4609/3815/1536/6363/4495/143425/2354/10628/653361/567/10235/2353/301/10243/3091/80310/2167/6523/7054/2081/83849/948/1906/366/2643/8837/596/3778/25932/9474/847/23411/8061/1027/6622/4313/6…
BP	GO:1901652	response to peptide	445	0.335349	1.86988	1e-10	2.71038e-09	1.58696e-09	5046	tags=37%, list=20%, signal=30%	6387/1393/133/2358/5621/5743/1910/185/2308/3397/2534/1398/5166/4804/10268/10580/9021/5641/8835/4780/677/7049/10365/9349/7099/26191/51762/4609/3553/1536/4035/81565/6844/6774/301/2650/9971/8615/51141/7097/23641/7054/2690/948/1906/3717/5105/8837/6653/847/23411/6775/1027/7431/4313/7832/8462/3164/64506/7079/59341/445/11031/2642/5443/23484/5327/376497/1535/1036/2213/5176/3716/3488/5020/4067/7412/5295/5…
BP	GO:0001774	microglial cell activation	42	0.7147	2.78449	1.0061e-10	2.71752e-09	1.59114e-09	4632	tags=74%, list=18%, signal=60%	8530/2358/712/199/728/3459/7305/7098/7097/3717/6622/120892/472/1191/3689/3725/3569/3565/5788/3949/6348/10333/7124/3684/566/351/1075/177/23208/4317/3596
BP	GO:0045229	external encapsulating structure organization	284	0.384493	2.04971	1.08191e-10	2.91223e-09	1.70515e-09	4893	tags=36%, list=19%, signal=29%	10516/5156/2022/9509/11093/9719/4239/1805/57188/59277/11117/8434/2294/1511/7133/7837/83716/9510/7132/2824/1842/5768/8510/90102/1520/7075/4035/2331/1471/91522/165/30008/4060/2621/5033/59350/7373/9806/25890/1285/8837/1286/4327/4313/4982/7177/649/84168/10653/6624/55790/255743/3913/64094/3569/10491/8516/2296/4316/81621/84695/7092/64116/5925/7146/5340/11095/55959/1308/3037/4016/1361/7124/1296/2199/175…
BP	GO:0071826	ribonucleoprotein complex subunit organization	135	-0.515088	-2.25397	1.23482e-10	3.31057e-09	1.93838e-09	4527	tags=44%, list=18%, signal=36%	3320/55011/10421/58155/57461/51081/10856/10907/23212/24148/6634/8562/3799/29777/8175/51340/51154/6128/27339/23246/64963/8894/6636/26121/54505/25929/10946/10419/55164/9129/11052/7415/84231/1653/6633/22907/3692/79833/9416/1659/26284/3326/140801/6628/4686/57819/6635/8607/1660/22827/5591/8161/6732/5433/6637/24144/10713/6631/25804
BP	GO:0048545	response to steroid hormone	300	0.371909	1.99968	1.23835e-10	3.31057e-09	1.93838e-09	2893	tags=28%, list=11%, signal=25%	6422/2022/654/5732/6943/133/10888/5743/4306/2/55325/7048/5069/7538/249/1668/677/11170/199/2099/1667/3931/7057/54658/1536/2354/10628/7043/3490/2353/678/301/9611/9353/7097/7054/2690/2908/81606/1906/3717/4824/5105/8837/596/23411/8061/2104/10424/594/952/167465/10413/595/687/2322/5066/8031/445/6898/4129/3485/5327/477/1535/2056/5187/1036/306/5176/57658/590/5020/3569/51569/6716/6715/5447/358/55885/54206…
BP	GO:0051054	positive regulation of DNA metabolic process	219	-0.451294	-2.10363	1.33332e-10	3.55234e-09	2.07994e-09	4540	tags=40%, list=18%, signal=33%	2140/3320/51720/6742/1950/10694/25913/65057/7486/26272/4292/6714/51750/5558/55929/8658/25792/10856/80174/1763/225689/581/9025/10574/60/5111/54799/51010/8550/5982/10576/7158/84501/10459/4216/7037/2264/79075/10902/1017/22948/3297/908/10155/4436/1736/50507/86/4862/10575/23126/7515/2187/79733/7292/5932/8317/11124/150275/84296/1663/1054/3326/8607/30968/5985/1660/51659/8295/27154/64785/5591/63922/5983/…
BP	GO:0016072	rRNA metabolic process	196	-0.469444	-2.14843	1.36987e-10	3.63735e-09	2.12971e-09	6260	tags=53%, list=25%, signal=40%	10775/2972/54853/7157/27340/23016/84128/84135/23195/4137/79707/2068/55272/25983/10360/84172/55636/54663/79922/2091/9014/10436/2971/55011/10799/23160/10969/51096/6949/23223/10607/285855/22803/51018/6227/23212/23481/285367/9330/10438/29081/79050/10813/10885/387338/29777/6201/63899/65095/92856/10927/9775/9790/115752/56915/11056/51010/2975/1662/51154/23076/23246/9136/55813/64963/6155/23560/54512/5522…
BP	GO:0002275	myeloid cell activation involved in immune response	89	0.56079	2.5328	1.52879e-10	4.0456e-09	2.36875e-09	3591	tags=47%, list=14%, signal=41%	1776/11314/11027/3162/2294/695/84106/5880/4615/3815/10125/2207/5293/7305/1794/6844/5294/729230/8832/201294/5729/2268/6688/5730/640/5336/6504/3598/8773/8291/306/3689/4067/84868/3566/3565/6348/6850/22904/3684/6814/5724
BP	GO:0051783	regulation of nuclear division	127	-0.520927	-2.25451	1.5751e-10	4.14646e-09	2.4278e-09	3833	tags=41%, list=15%, signal=35%	7474/51343/23236/10201/255324/1761/23636/84861/348654/55124/10459/1104/10419/701/9820/9088/3209/51433/7756/9183/51434/5885/286053/9700/7517/10403/27085/995/26271/55755/55055/8697/51529/9735/4085/1111/81620/11130/9319/4288/157313/10635/4751/1063/286151/6790/699/891/9212/7272/991/51203
BP	GO:0010594	regulation of endothelial cell migration	155	0.45441	2.24092	1.57748e-10	4.14646e-09	2.4278e-09	3609	tags=35%, list=14%, signal=30%	2658/7010/1634/6915/84913/5547/5743/3162/147372/388/2113/9314/94/5641/4780/659/4846/7057/5293/5294/301/3091/1969/9353/54453/1906/5764/23411/2625/6237/57381/7424/23328/306/5176/64094/207/64218/5797/6678/8829/168667/55294/9734/4208/2752/27286/2185/3690/7124/284/4204/1647/5606
BP	GO:0090068	positive regulation of cell cycle process	204	-0.457126	-2.10632	1.62814e-10	4.26528e-09	2.49737e-09	4289	tags=40%, list=17%, signal=34%	6755/6683/1950/6840/252983/7474/134353/5902/7015/23236/1778/80174/255324/11200/6868/25942/225689/1761/4193/10755/23636/7027/56257/348654/8450/55124/9984/55920/1981/55835/8563/328/5889/1019/163786/79733/3209/51433/8317/51434/5885/1663/57504/286053/993/9371/51692/9700/7517/990/10403/8502/27085/995/26271/51514/10615/8697/6241/51529/144455/4085/10733/6240/81620/81610/994/2237/10635/9493/9928/29899/67…
BP	GO:0048017	inositol lipid-mediated signaling	161	0.452805	2.21567	1.74991e-10	4.56902e-09	2.67522e-09	3413	tags=37%, list=14%, signal=32%	7010/5156/1634/11126/1436/6403/3059/5783/3082/6352/3357/677/26051/3815/375033/10125/5649/5293/653361/23533/5294/56034/10870/80310/5330/1906/3717/4824/847/23411/2625/2268/55615/5333/2149/4920/2322/5728/5334/113791/9651/22933/10507/5295/207/49860/118788/25827/5343/4915/3643/4883/55763/3479/8395/5289/5332/7124/2064/284
BP	GO:0051028	mRNA transport	105	-0.543265	-2.29028	1.82023e-10	4.73684e-09	2.77348e-09	5081	tags=54%, list=20%, signal=44%	8106/26993/23279/9961/9688/55677/80145/65110/56648/8658/2332/1069/81929/22916/7884/29072/23636/23089/220988/84321/6830/59343/10644/9984/79228/8570/9972/10762/55746/2733/3297/348995/65109/56943/29890/23511/8563/26019/10642/25909/7514/10128/23144/8480/23225/57122/4686/9883/9887/79023/1660/10643/79902/23381/5433/9631/23165
BP	GO:0006958	complement activation, classical pathway	34	0.752289	2.78993	1.94915e-10	5.05552e-09	2.96007e-09	2003	tags=56%, list=8%, signal=52%	730/713/1378/715/712/1604/714/51279/3543/710/716/3426/735/4153/729/1191/10747/722/325
CC	GO:0005813	centrosome	484	-0.368793	-1.85271	2.0747e-10	5.3634e-09	3.14034e-09	4590	tags=34%, list=18%, signal=28%	22920/79848/2140/10211/51364/57534/54903/808/55540/56311/4236/6683/8409/10694/5420/7486/84318/9261/10286/5682/55125/5902/9857/23637/91754/57679/8658/94032/219844/1778/10856/51199/1069/79959/56928/3799/11104/2010/205564/27175/6201/10540/54875/6566/80746/23352/3304/23636/10101/84861/27019/51715/115752/7016/29855/5111/348654/9001/171568/4190/4296/10300/136895/56890/4957/1453/84516/28964/23291/5576/1…
BP	GO:0002705	positive regulation of leukocyte mediated immunity	122	0.491539	2.32646	2.18604e-10	5.61419e-09	3.28718e-09	3726	tags=43%, list=15%, signal=36%	11126/8809/912/3824/1604/3554/695/975/117157/114836/10666/3815/114548/3553/10125/7305/567/64581/3133/3822/4068/3125/3594/2625/7409/3823/6688/91543/5336/3106/6504/3136/3122/3134/3689/3569/3565/5788/6778/3902/3805/10892/8417/7189/3263/259197/7124/3593/3684/5724/563/911
BP	GO:0048015	phosphatidylinositol-mediated signaling	158	0.456465	2.24163	2.18386e-10	5.61419e-09	3.28718e-09	3413	tags=38%, list=14%, signal=33%	7010/5156/1634/11126/1436/6403/3059/5783/3082/6352/3357/677/26051/3815/375033/10125/5649/5293/653361/23533/5294/56034/10870/80310/5330/1906/3717/4824/847/23411/2625/2268/55615/5333/2149/4920/2322/5728/5334/113791/9651/22933/10507/5295/207/49860/118788/25827/5343/4915/3643/4883/55763/3479/8395/5289/5332/7124/2064/284
BP	GO:0071346	cellular response to interferon-gamma	113	0.511993	2.41255	2.44772e-10	6.24528e-09	3.65669e-09	4593	tags=49%, list=18%, signal=40%	6368/6359/11093/6352/55647/199/6347/7099/6369/4609/6366/6363/3055/834/7098/7294/2934/7097/356/3394/388372/3594/10435/1906/3717/7454/9482/7431/961/414062/445/3113/23521/3716/115362/140885/6349/3659/6348/9341/1612/3263/7376/7124/6362/3593/6814/115361/6357/2635/10096/6360/163351/388646/383
BP	GO:0003012	muscle system process	394	0.339569	1.87327	2.44191e-10	6.24528e-09	3.65669e-09	3609	tags=27%, list=14%, signal=24%	147/6915/4092/9464/5743/1910/3162/1193/2308/3764/4634/7133/9172/9499/2775/7132/148/3357/6442/5142/199/7111/57817/4846/6324/1160/3815/3553/5144/4638/8082/5294/2627/4660/3270/5023/2934/126306/60675/3572/5999/1906/7852/8837/3778/2946/7140/952/92241/5997/3600/3164/6444/2149/10316/140628/59341/5530/796/816/384/8470/477/3753/1535/255743/309/3488/5020/5348/800/6909/3363/3741/287/2697/9446/30845/6330/973…
BP	GO:0060191	regulation of lipase activity	82	0.568558	2.51397	2.48653e-10	6.3237e-09	3.7026e-09	5478	tags=59%, list=22%, signal=46%	5156/64805/5322/185/942/1902/6352/148/3357/2099/728/3702/3815/4035/301/7294/5330/653145/22925/6401/6622/5997/10316/5031/10672/5447/9734/51129/2769/337/5046/7376/335/27329/5724/338328/11331/2247/283/116519/2260/5538/552/10062/350/1909/5159/5741
BP	GO:0002548	monocyte chemotaxis	65	0.606388	2.5669	2.49876e-10	6.33423e-09	3.70877e-09	3898	tags=48%, list=15%, signal=40%	6387/6368/1230/6359/2358/1511/6283/6352/5641/199/6347/6369/6366/6363/301/729230/9353/388372/414062/796/8600/4067/3569/3958/6349/6348/245937/6362/1843/6357/4681
BP	GO:0050853	B cell receptor signaling pathway	50	0.660392	2.63056	2.54007e-10	6.41818e-09	3.75792e-09	3086	tags=50%, list=12%, signal=44%	11314/695/3543/975/5583/26191/3702/5293/596/89857/952/9404/640/5336/660/2213/973/4067/3932/10451/115352/5788/4208/6850/974
BP	GO:0072593	reactive oxygen species metabolic process	202	0.425497	2.15959	2.5715e-10	6.47671e-09	3.79219e-09	3747	tags=38%, list=15%, signal=32%	10516/2358/5547/185/3040/2308/3043/6441/2534/7837/1544/5166/7048/27244/4780/5880/4846/7099/7057/1536/653361/7305/2950/64581/3091/2878/654817/4689/948/1906/22925/2643/8837/596/9474/847/83875/6622/7409/65018/120892/27165/6649/5336/3047/240/4353/3048/4129/384/1535/11035/22933/2773/3689/84329/3240/51181/1543/654816/337/1182/57580/6850/10935/2185/59272/10333/7124/3684/1647/3042/664/10013/706/2771
BP	GO:0019932	second-messenger-mediated signaling	270	0.381707	2.02607	2.70061e-10	6.78009e-09	3.96983e-09	3689	tags=29%, list=15%, signal=25%	5138/55273/1230/6915/920/64805/2357/133/2358/5621/1910/185/1193/27115/6403/695/3357/10663/4846/2274/7057/1827/5144/51655/64581/729230/3270/116/374403/1240/10231/50852/948/1906/7852/6401/5341/2946/7535/107/120892/6444/4772/10316/9104/5336/5530/3084/5443/916/477/8600/9451/79054/84174/7412/287/2833/9446/5533/5788/358/6348/6548/7320/3640/58529/6850/10411/57192/2185/5598/3479/6344/7124/10803/566/5140/…
BP	GO:0050868	negative regulation of T cell activation	109	0.515296	2.41271	2.85024e-10	7.13289e-09	4.17639e-09	3504	tags=40%, list=14%, signal=35%	339390/11326/11314/10288/4092/5621/1378/6441/1511/3142/942/10875/864/26191/2615/301/79679/54900/80380/2737/972/79626/135/384/2213/57045/7805/84868/3566/3565/3958/84695/604/3659/8379/3902/11006/56940/1051/941/27242/3559/2064/3456
BP	GO:0002715	regulation of natural killer cell mediated immunity	46	0.672916	2.67591	3.13493e-10	7.82035e-09	4.57891e-09	4880	tags=59%, list=19%, signal=47%	11126/3824/1398/117157/114836/10666/10125/3133/3822/4068/10225/7409/3823/3821/3106/3134/84868/3902/3805/259197/9437/3593/5272/56253/409/6777/3965
BP	GO:1901990	regulation of mitotic cell cycle phase transition	259	-0.427936	-2.01658	3.21335e-10	7.99053e-09	4.67855e-09	3866	tags=36%, list=15%, signal=31%	1642/51343/134353/7015/10385/23236/80174/11200/7023/5515/6868/25942/56658/4193/55198/84861/7027/59343/56257/348654/8450/10459/55920/1030/1981/65123/1017/701/84936/5933/55835/80279/328/11073/5889/1019/163786/51433/7756/8317/9183/51434/2071/5885/57504/57551/286053/993/51692/55159/9700/7517/10197/990/10403/27085/29980/995/26271/5591/51514/60561/835/55755/672/55055/1029/8697/6241/51529/9735/144455/40…
MF	GO:0005125	cytokine activity	216	0.404479	2.08269	3.41095e-10	8.45505e-09	4.95053e-09	3613	tags=26%, list=14%, signal=23%	6387/2658/6368/90865/654/6359/10148/9547/653/6352/8742/146225/6347/6369/3553/6366/6363/112616/7043/3603/6372/10673/356/388372/1906/64388/3600/4982/2920/414062/649/7472/3084/92304/58191/8600/2056/959/7481/3445/3569/3565/6349/6348/10135/114900/1489/944/54361/2323/7124/6362/3593/3574/54097/3456/6357
BP	GO:0001912	positive regulation of leukocyte mediated cytotoxicity	53	0.652105	2.67236	3.60864e-10	8.91687e-09	5.22093e-09	3726	tags=51%, list=15%, signal=43%	11126/912/3824/114836/10666/10125/7305/567/3133/3822/4068/3594/7409/3823/6688/3106/3136/3122/3134/5788/3902/8417/259197/3593/3684/563/911
BP	GO:0032732	positive regulation of interleukin-1 production	66	0.606931	2.56919	3.85588e-10	9.49783e-09	5.5611e-09	4880	tags=55%, list=19%, signal=44%	353514/11027/4615/7099/114548/6363/3428/834/7305/149628/6774/64581/3603/51311/948/3717/58484/115362/84868/3569/1958/6348/6288/10892/9447/10333/7124/24145/566/10972/55655/351/177/3098/4332/3965
BP	GO:0043414	macromolecule methylation	224	-0.439469	-2.05358	4.08228e-10	1.0024e-08	5.86916e-09	5791	tags=45%, list=23%, signal=35%	8468/64324/150572/1499/80349/10322/54880/56341/54093/79922/79813/2091/9463/11180/24140/10436/55677/55011/55621/56154/55929/163589/4801/79872/6634/346171/29081/10664/55870/29072/387338/9836/63899/4552/11108/339175/80204/29104/2641/55798/56254/6830/56257/8731/1387/55039/30827/55124/4602/144233/54554/4802/10919/51742/9219/84661/9739/4234/26147/63925/59336/10419/117246/64754/23168/10155/51547/29890/1…
CC	GO:0000922	spindle pole	130	-0.514687	-2.2345	4.12793e-10	1.01044e-08	5.91624e-09	3658	tags=41%, list=15%, signal=35%	8658/51199/5515/11104/2010/2801/23636/10101/84861/10300/4957/23005/28964/3297/3796/55200/199953/1639/11073/27229/9183/5885/1663/84722/8480/10274/7840/10460/990/8502/10615/26586/55755/284403/9793/9735/4085/10733/81610/994/3832/7283/4751/1063/29899/6790/891/9212/22974/150468/991/9055/259266
BP	GO:0071248	cellular response to metal ion	179	0.431088	2.15906	4.77655e-10	1.16557e-08	6.82453e-09	3818	tags=36%, list=15%, signal=31%	1393/654/4502/5621/5743/3162/288/4489/4493/4501/4499/4494/1544/8826/30061/5641/4780/3726/1536/4495/143425/2354/653361/567/10235/2353/2167/7054/83849/1906/25932/1027/6622/4496/107/5311/120892/284111/5336/84557/241/113/9451/3707/84329/5176/3725/1543/468/57586/207/23621/358/4208/144402/57192/1742/6609/1740/2203/664/706/79085/6569/3777
BP	GO:0002285	lymphocyte activation involved in immune response	184	0.423619	2.14307	5.08646e-10	1.23734e-08	7.24475e-09	3997	tags=37%, list=16%, signal=31%	4092/8809/1378/5734/8320/975/3142/942/114836/10875/7099/114548/6363/2207/4818/6774/301/28514/3822/4063/3394/3594/201294/5105/6095/3662/2625/972/8993/11151/6688/5336/6194/55619/139818/5450/959/4242/2213/3122/3134/10538/3445/84868/3569/3109/64218/3566/3565/6482/3958/51744/5788/84695/6778/604/4064/10892/6556/2185/941/5663/3593/3456/911/159296/79915/84807
BP	GO:0045058	T cell selection	46	0.668203	2.65717	5.43919e-10	1.31905e-08	7.72318e-09	4774	tags=70%, list=19%, signal=56%	920/912/114836/1794/6774/4063/3594/596/3662/9474/2737/2625/972/7535/3600/915/916/64919/3707/10538/3569/5788/84695/6778/6850/3593/9760/917/1236/84433/940/326
BP	GO:1990868	response to chemokine	86	0.549763	2.47818	5.50278e-10	1.32219e-08	7.74157e-09	4311	tags=42%, list=17%, signal=35%	6387/6368/1230/6359/81704/6352/10663/6347/6369/6366/6363/3091/729230/9353/6372/1240/388372/1906/7852/2920/414062/2833/2296/6349/6348/6586/10019/2185/6362/10803/1843/6357/1236/1232/6558/6360
BP	GO:1990869	cellular response to chemokine	86	0.549763	2.47818	5.50278e-10	1.32219e-08	7.74157e-09	4311	tags=42%, list=17%, signal=35%	6387/6368/1230/6359/81704/6352/10663/6347/6369/6366/6363/3091/729230/9353/6372/1240/388372/1906/7852/2920/414062/2833/2296/6349/6348/6586/10019/2185/6362/10803/1843/6357/1236/1232/6558/6360
BP	GO:0048871	multicellular organismal homeostasis	475	0.320705	1.79526	5.4934e-10	1.32219e-08	7.74157e-09	3616	tags=28%, list=14%, signal=24%	1621/51316/654/9079/8809/5547/1436/5743/1910/284207/2308/3397/3908/6441/6456/5166/249/30061/57817/4846/1003/7099/10400/9696/583/3553/58494/57333/55812/567/1080/6774/2034/56034/28514/729230/116/2167/8529/1240/948/8842/3717/2180/7852/596/3662/23411/3635/2104/952/37/11151/4692/10413/3600/25987/4982/7033/2149/10912/7107/11215/25979/59341/3988/58488/28512/796/9476/5334/29887/50486/376497/7122/8600/493…
BP	GO:0043542	endothelial cell migration	200	0.417266	2.11211	5.57296e-10	1.33495e-08	7.81632e-09	3609	tags=32%, list=14%, signal=28%	2658/7010/1634/6915/84913/5547/5743/3162/147372/3397/388/2113/9314/94/5641/4780/8742/659/4846/1003/7057/5293/5294/301/3091/1969/9353/54453/1906/5764/23411/2625/9404/3164/161198/5728/6237/57381/7424/23328/306/5176/64094/207/64218/5797/6678/8829/11167/168667/55294/9734/4208/2752/27286/2185/5613/3690/335/7124/284/4204/1647/5606
BP	GO:0061982	meiosis I cell cycle process	99	-0.549746	-2.3006	5.62742e-10	1.34389e-08	7.86864e-09	4827	tags=46%, list=19%, signal=38%	10111/10018/2072/56159/56154/4292/80198/27030/5719/225689/1761/55124/10919/79703/2956/51547/83990/7589/29988/116138/29893/5889/11077/5885/8438/993/9700/10403/84057/4439/146956/898/995/26271/80010/25788/9319/2177/9134/994/10635/1164/6790/9232/9133/7153
BP	GO:0016570	histone modification	395	-0.383386	-1.88768	5.66611e-10	1.34902e-08	7.89866e-09	5805	tags=36%, list=23%, signal=28%	283248/64324/83443/150572/26036/55100/1499/80349/10322/79718/25836/54880/56341/54093/2138/79813/79184/2091/26993/201163/7319/6883/55806/2140/55677/55011/51720/23210/648/5578/8091/6878/1487/1642/55929/4801/2332/10856/6015/200186/10664/80764/55870/29072/25942/7862/10075/51366/11108/9025/29104/2641/60/56254/79885/6830/6873/1387/54799/8450/30827/55124/9810/4602/29115/10336/54554/4802/10919/51742/9219…
BP	GO:0003018	vascular process in circulatory system	247	0.396087	2.0749	6.18645e-10	1.46844e-08	8.59789e-09	4402	tags=34%, list=17%, signal=28%	5138/147/7010/1621/654/6915/133/6916/5743/1910/185/3764/54407/6456/148/23428/3357/10365/27345/659/4846/1003/10800/4035/10060/6515/10979/5023/9353/6523/11309/948/1906/342527/2643/3778/9474/6580/952/4313/5997/2149/6649/59341/6506/135/796/477/376497/7122/3953/8671/6567/489/3363/3741/2296/9732/6542/482/153/154/92745/3643/4883/59272/7124/151/284/566/10911/2244/10266/3352/6517/2729/6582/1373/1244/9590/…
BP	GO:0002444	myeloid leukocyte mediated immunity	94	0.534331	2.41861	6.54861e-10	1.54971e-08	9.07372e-09	4962	tags=55%, list=20%, signal=45%	1776/11314/3162/2294/1511/695/84106/5880/4615/3815/10125/5293/7305/6844/5294/3133/729230/6372/8832/201294/5729/2268/6688/5730/640/3598/8773/2213/306/3689/4067/3569/3566/3565/6348/54210/6850/3684/6814/5724/566/64170/5272/2242/9188/8723/2209/383/3596/27342/3965/9846
BP	GO:0022618	ribonucleoprotein complex assembly	127	-0.511594	-2.21412	6.58409e-10	1.55341e-08	9.09539e-09	4527	tags=43%, list=18%, signal=36%	3320/55011/10421/58155/57461/51081/10856/10907/23212/24148/6634/8562/29777/8175/51340/51154/6128/27339/23246/64963/8894/6636/26121/54505/25929/10946/10419/55164/9129/11052/84231/1653/6633/22907/3692/79833/9416/26284/3326/140801/6628/4686/57819/6635/8607/1660/22827/5591/8161/6732/5433/6637/10713/6631/25804
BP	GO:0071559	response to transforming growth factor beta	233	0.397057	2.07139	6.61275e-10	1.55549e-08	9.10755e-09	3193	tags=29%, list=13%, signal=26%	5138/6422/4091/2022/7123/8483/9719/4092/9839/10253/11117/3397/2534/1398/269/94/8425/7048/677/7049/2530/65997/864/1003/7057/2615/7043/2331/2353/678/6774/10979/26524/27122/80310/4093/2908/10370/1906/64838/8837/23411/25878/83891/9404/6688/6386/7472/10252/1028/7122/255743/57045/3725/64081/8692/8516/3565/5654/2201/58533/56940/4208/9958/80139/22938/54361/5598
BP	GO:0050852	T cell receptor signaling pathway	115	0.498637	2.35263	6.90532e-10	1.61944e-08	9.48203e-09	4161	tags=47%, list=17%, signal=39%	11314/11126/5621/1997/2534/8631/975/925/79037/84106/5142/26191/919/10666/3702/5144/5293/3937/79679/7294/4068/3125/50852/2625/3635/7535/5336/3115/56244/7805/84174/3932/3958/5788/11006/56940/114625/11118/10892/7189/27242/5663/3119/10384/153579/23308/84807/4340/1236/54923/11119/53347/3551/84433
MF	GO:0046906	tetrapyrrole binding	132	0.47388	2.27592	7.21284e-10	1.68149e-08	9.84535e-09	3720	tags=40%, list=15%, signal=34%	79689/6916/1571/5743/3162/5740/113612/51302/3040/3043/114757/7837/1544/124936/4846/50865/1536/6392/1576/6948/55640/1559/8529/1592/6999/1555/3717/847/10424/3047/4353/1549/3048/1558/1582/1535/1565/1543/1593/64816/55788/1548/284541/66002/5742/285440/6947/6821/875/23593/3042/4548/1551
BP	GO:0045787	positive regulation of cell cycle	279	-0.414724	-1.97812	7.19822e-10	1.68149e-08	9.84535e-09	4292	tags=37%, list=17%, signal=31%	5017/6755/6683/1950/5578/6840/6714/252983/7474/134353/5902/7015/23236/1778/80174/255324/11200/6868/25942/225689/5716/1761/904/4193/10755/23636/1977/7027/56257/348654/8450/1978/55124/8851/9984/55920/1981/3297/150465/55835/8563/328/26471/5889/1019/163786/79733/3209/51433/8317/151195/3169/22954/51434/5885/1663/57504/84722/286053/3054/993/9371/51692/9700/7517/1163/990/221477/10403/8502/27085/995/2627…
BP	GO:0002440	production of molecular mediator of immune response	195	0.417811	2.11989	7.28133e-10	1.69242e-08	9.90934e-09	3524	tags=36%, list=14%, signal=32%	4092/11126/8809/1378/3162/11213/1604/3554/7133/695/975/942/7099/26191/10666/3815/114548/3553/7043/7098/567/64581/3133/729230/3125/10225/948/1178/9474/23411/2625/972/91543/5336/6504/3115/684/3598/3113/959/2213/3122/3134/3111/3117/10538/7805/3569/3109/115352/3566/3565/51744/5788/6778/604/11006/3805/3126/10892/54210/7189/2048/3263/54106/335/7124/284/7528/3456/3119
BP	GO:0002526	acute inflammatory response	105	0.509618	2.37622	7.38333e-10	1.71105e-08	1.00184e-08	3377	tags=40%, list=13%, signal=35%	9332/1776/5547/5743/2152/1910/695/2/6279/4889/59307/57817/54658/114548/3553/2950/5294/3133/3572/4153/2625/445/923/5359/241/8600/2056/325/2213/3700/7412/3240/3569/3565/6291/2157/6288/54210/3818/1051/9180/7124
BP	GO:0000723	telomere maintenance	115	-0.51736	-2.20624	7.44182e-10	1.71952e-08	1.0068e-08	4935	tags=55%, list=20%, signal=44%	51548/11284/3178/6118/64858/26354/1499/545/9894/5514/2547/10111/3320/2072/51002/10694/25913/9937/65057/6672/7486/26272/6714/51750/7015/8658/1763/225689/10574/5111/8550/64421/6119/10576/4216/55226/50485/22948/908/5981/1736/328/10575/5889/7515/54552/3326/286053/7517/23381/898/5591/24144/80119/9401/142/7203/9156/9134/2237/4751/641/9212
BP	GO:0031960	response to corticosteroid	150	0.452225	2.21773	7.78039e-10	1.79246e-08	1.04951e-08	2893	tags=36%, list=11%, signal=32%	2022/654/133/10888/5743/2/5069/7538/249/677/11170/199/3931/54658/1536/2354/3490/2353/678/301/9353/7054/2690/2908/1906/3717/5105/8837/596/8061/594/595/687/2322/5066/445/6898/4129/3485/5327/1535/2056/1036/306/5176/590/5020/3569/6715/5447/358/54206/10076/6586
CC	GO:0072562	blood microparticle	105	0.509262	2.37456	8.15374e-10	1.87297e-08	1.09665e-08	4105	tags=40%, list=16%, signal=34%	2022/8547/2220/922/713/715/3040/3043/714/2/51279/710/716/735/2040/5627/2934/3306/6386/3048/1191/253461/722/325/3700/590/3240/10878/1356/3075/51129/5858/5340/173/337/3263/335/3078/731/2244/3250/6521
MF	GO:0048018	receptor ligand activity	438	0.324506	1.80482	8.30757e-10	1.90272e-08	1.11407e-08	5478	tags=31%, list=22%, signal=25%	10584/6387/2658/6368/4908/90865/654/6359/10148/133/9535/9547/653/284207/1511/3082/6320/6352/8742/146225/57817/8074/6347/6369/3553/4803/6366/6363/112616/7043/2797/56034/5368/116/2621/80310/3603/6372/7039/10673/356/26281/388372/10435/1906/5764/434/64388/3600/4982/2920/414062/649/7472/3084/796/92304/5443/58191/8600/7424/2056/959/2202/7481/5020/3445/10507/3569/117579/4969/64218/3565/3958/6349/2258/63…
BP	GO:0014065	phosphatidylinositol 3-kinase signaling	128	0.479461	2.28247	8.57892e-10	1.95915e-08	1.1471e-08	3413	tags=40%, list=14%, signal=35%	7010/5156/1634/11126/6403/3059/5783/3082/6352/3357/677/26051/3815/375033/10125/5649/5293/653361/23533/5294/56034/10870/80310/1906/3717/4824/847/23411/2625/2268/55615/2149/4920/2322/5728/113791/22933/10507/5295/207/49860/118788/25827/5343/4915/3643/3479/8395/7124/2064/284
BP	GO:0031663	lipopolysaccharide-mediated signaling pathway	58	0.621263	2.5844	8.61236e-10	1.96107e-08	1.14823e-08	3591	tags=52%, list=14%, signal=44%	654/11027/1604/6352/9450/4615/59307/4846/6347/7099/26191/929/3553/3055/7097/948/6688/5336/23643/923/23328/4067/207/6348/4064/10892/7189/245928/7124/5724
BP	GO:0045786	negative regulation of cell cycle	306	-0.400233	-1.92486	8.66577e-10	1.96751e-08	1.152e-08	2150	tags=26%, list=9%, signal=25%	7158/9984/10459/56890/27339/51053/10432/79968/1030/65123/1017/701/84936/5933/7709/4436/54962/83990/80279/9656/4221/8563/11073/7159/26471/9031/79733/5883/7756/9183/25896/5885/57551/90806/84126/23513/55159/9700/7517/1386/990/1050/10403/27085/9368/146956/29980/26271/5591/51514/51654/60561/835/55755/672/55055/1029/4591/6839/9735/144455/4085/1111/81620/11130/9319/51512/2177/899/4751/641/1063/1020/8914…
BP	GO:0097237	cellular response to toxic substance	104	0.518859	2.40576	8.8245e-10	1.99775e-08	1.16971e-08	3388	tags=38%, list=13%, signal=33%	10516/5743/1193/3040/3043/114757/7837/27244/2947/4780/4846/127/4056/2950/2878/64359/948/2643/847/128/2946/65018/6280/2098/2954/6649/3047/4353/3048/2745/241/3240/9446/216/337/5742/10935/2880/7124/2944
BP	GO:0071887	leukocyte apoptotic process	102	0.515694	2.38223	8.85343e-10	1.99853e-08	1.17016e-08	3299	tags=44%, list=13%, signal=38%	6387/558/155038/81704/695/3059/6352/1831/10461/6366/6363/5293/3575/84941/301/3091/2621/356/939/355/1178/23411/2737/972/640/5728/6194/3665/384/11035/29124/3707/80301/4067/5588/3569/207/6482/3958/604/4208/55716/171558/27242/3559
BP	GO:0042445	hormone metabolic process	218	0.397853	2.05477	9.08356e-10	2.04458e-08	1.19713e-08	4625	tags=36%, list=18%, signal=29%	5156/654/133/9227/653/1910/125/1511/5947/1544/9060/2099/5959/220/127/54658/1576/3091/124/27122/1559/1592/27284/2690/1359/83875/2625/54884/1508/2028/10170/8608/81555/130/64577/84976/1558/54659/126/1565/9249/6567/590/25976/1543/6716/6715/1958/3294/5447/8228/216/2230/389434/4790/2672/54361/5046/59272/51170/6783/151056/1081/706/1551/7923/51144/57104/6934/1562/10202/6718/7366/59338/57665/6822/5950/6817
BP	GO:0009451	RNA modification	115	-0.515439	-2.19804	9.45611e-10	2.12234e-08	1.24266e-08	5366	tags=50%, list=21%, signal=39%	6741/112970/79922/2091/11180/24140/10436/285605/55621/51002/23210/26610/55687/79872/285367/29081/387338/9836/63899/56931/54901/27304/339175/55798/126789/56257/8731/83448/55039/64172/64118/144233/4234/55226/80324/27079/84267/54522/117246/103/1736/29890/64863/127253/113000/55695/84705/56339/3182/9582/11062/10785/81605/51654/6894/54517/51726
BP	GO:0030101	natural killer cell activation	83	0.550636	2.45216	9.54321e-10	2.13577e-08	1.25052e-08	3698	tags=41%, list=15%, signal=35%	558/8809/10461/26191/639/10125/5293/3560/7305/4818/3133/3822/2621/3717/201294/2268/4783/8993/11151/3600/6504/914/3134/10464/3445/84868/5087/51744/5788/259197/9437/3593/3456/9760
MF	GO:0030545	signaling receptor regulator activity	472	0.315493	1.76298	1.05558e-09	2.35565e-08	1.37926e-08	4802	tags=27%, list=19%, signal=23%	10584/6387/2658/6368/4908/90865/654/6359/10148/133/9535/9547/653/160364/284207/1511/7837/3082/6320/6352/8742/146225/57817/659/8074/6347/4061/6369/3553/4803/6366/6363/112616/7043/2797/56034/27122/5368/116/2621/80310/3603/6372/7039/10673/356/26281/388372/10435/1906/5764/434/64388/3600/4982/2920/414062/649/7472/3084/796/92304/5443/58191/8600/7424/2056/959/2202/7481/5020/3445/10507/3569/117579/4969/6…
BP	GO:0032637	interleukin-8 production	75	0.560418	2.42884	1.10793e-09	2.46546e-08	1.44356e-08	3377	tags=43%, list=13%, signal=37%	2658/2152/11027/945/9314/2219/4615/7099/26191/929/3553/7098/7096/6774/64581/301/7097/51311/972/2149/914/64922/408/8692/3569/307/51744/5788/6850/10333/54106/7124
BP	GO:0042269	regulation of natural killer cell mediated cytotoxicity	43	0.672826	2.64509	1.14842e-09	2.54622e-08	1.49084e-08	4880	tags=58%, list=19%, signal=47%	11126/3824/1398/114836/10666/10125/3133/3822/4068/7409/3823/3821/3106/3134/84868/3902/3805/259197/9437/3593/5272/56253/409/6777/3965
BP	GO:0045839	negative regulation of mitotic nuclear division	46	-0.678689	-2.46433	1.15232e-09	2.54622e-08	1.49084e-08	2695	tags=52%, list=11%, signal=47%	84861/348654/10459/701/7756/9183/5885/7517/10403/27085/26271/55755/55055/9735/4085/1111/81620/11130/9319/1063/699/891/9212/7272
BP	GO:0045088	regulation of innate immune response	207	0.409193	2.10007	1.15397e-09	2.54622e-08	1.49084e-08	5023	tags=42%, list=20%, signal=34%	11326/5322/2358/11126/912/11027/1378/3824/11213/2534/1398/2/710/84282/2219/6352/4780/117157/114836/7099/26191/10666/10125/3055/81030/3428/653361/7305/149628/64581/3133/7294/3822/4068/51311/10225/4153/79132/2268/7409/3823/6688/3821/5336/3106/58484/3665/5359/4938/2213/3134/4067/115362/84868/3659/3902/3075/3805/9683/9958/6850/7189/9447/3263/259197/7376/9437/3593/3456/7520/64170/57169/5272/3551/79671…
BP	GO:0001667	ameboidal-type cell migration	385	0.338336	1.85566	1.16857e-09	2.57119e-08	1.50546e-08	5217	tags=35%, list=21%, signal=28%	2658/7010/1634/6915/84913/64805/9839/9464/23500/5547/5743/1910/3162/147372/3397/114757/388/2113/9314/94/7048/4070/8826/5641/4780/3357/8742/659/4846/1003/7057/3815/5293/9124/5294/301/3091/1969/9353/57111/54453/1906/5764/5048/23411/2625/57142/9404/3164/54566/161198/5728/5336/6237/57381/7424/23328/309/306/5176/64094/3725/7481/4163/10507/6899/7763/8692/397/207/2697/64218/30812/10982/3565/5797/1793/66…
BP	GO:0001867	complement activation, lectin pathway	12	0.919856	2.50043	1.18065e-09	2.59048e-08	1.51676e-08	1854	tags=92%, list=7%, signal=85%	10584/78989/8547/2220/4239/2/710/2219/4153/5648/10747
BP	GO:1990748	cellular detoxification	98	0.514809	2.36947	1.22711e-09	2.68491e-08	1.57205e-08	3622	tags=40%, list=14%, signal=34%	10516/5743/1193/3040/3043/114757/7837/27244/2947/4780/4846/127/4056/2950/2878/64359/948/2643/847/128/2946/6280/2098/2954/6649/3047/4353/3048/2745/241/3240/9446/216/337/5742/10935/2880/2944/3042
BP	GO:0006066	alcohol metabolic process	319	0.355348	1.91529	1.23692e-09	2.69882e-08	1.58019e-08	4625	tags=38%, list=18%, signal=32%	1621/654/9227/653/1910/9023/1071/51302/125/1544/319/3931/5959/220/127/54657/9517/1576/217/114876/1080/114879/9971/124/27122/1559/27010/51141/10613/27284/80168/5105/2643/8720/5341/5805/847/128/54884/6622/37/25987/10170/8867/219/8608/84869/7436/5728/5336/130/1558/5031/54659/3953/9562/126/10449/1565/9249/3707/11160/2819/1543/1593/5860/33/5447/54363/3565/8228/116255/51744/3990/2053/3949/216/2230/5593…
BP	GO:0050854	regulation of antigen receptor-mediated signaling pathway	55	0.62374	2.55978	1.25161e-09	2.71576e-08	1.59011e-08	2836	tags=44%, list=11%, signal=39%	11314/11126/5621/1997/975/79037/5583/26191/10666/4068/50852/9404/640/2213/7805/84174/4067/3932/115352/3958/5788/11006/56940/10892
BP	GO:0045444	fat cell differentiation	208	0.407185	2.09295	1.24888e-09	2.71576e-08	1.59011e-08	4143	tags=37%, list=16%, signal=31%	6422/4091/5156/79689/51316/83643/5743/2869/284207/2308/1052/9314/23414/122953/7538/677/28951/583/9935/678/60485/3398/10979/4329/2167/1240/1389/6041/6095/23411/2625/7704/5997/10413/595/3164/3400/2170/25979/59341/240/11007/55212/123016/22933/25999/3569/1959/207/30812/4929/862/55885/153/154/6591/1051/22809/114885/2487/2255/6720/7124/7041/6783/664/10013/84159/5292/79068/6517/1385/6934/10891/51320/3280
CC	GO:0032993	protein-DNA complex	110	-0.527079	-2.23763	1.2554e-09	2.71645e-08	1.59051e-08	4294	tags=45%, list=17%, signal=38%	58531/25913/65057/8091/5558/55929/7015/4801/10856/3728/50809/6908/60/2957/5111/54799/6119/4802/55290/10902/7709/2960/5437/10714/86/26471/6666/2071/84296/8607/5422/4174/51659/5557/8295/29980/64785/5591/5424/23512/4175/6944/23649/142/4800/4172/4173/4176/4171/1058
CC	GO:0031261	DNA replication preinitiation complex	10	-0.944871	-2.30098	1.34113e-09	2.88601e-08	1.68979e-08	822	tags=90%, list=3%, signal=87%	84296/4174/51659/64785/4175/4172/4173/4176/4171
CC	GO:0071162	CMG complex	10	-0.944871	-2.30098	1.34113e-09	2.88601e-08	1.68979e-08	822	tags=90%, list=3%, signal=87%	84296/4174/51659/64785/4175/4172/4173/4176/4171
BP	GO:0008037	cell recognition	148	0.454251	2.22557	1.36059e-09	2.91986e-08	1.70961e-08	4236	tags=37%, list=17%, signal=31%	10584/1949/78989/8547/2220/2350/5322/10332/30835/81704/5551/91624/3543/975/2219/30815/10666/6366/6363/375033/148229/1794/2042/64581/152330/55118/948/4153/7852/57142/4692/4685/63923/923/722/84868/5175/27020/3958/8829/2048/54538/51294/27242/259197/2290/921/26998/203102/1236/2525/2047/351/928/1826
BP	GO:0006268	DNA unwinding involved in DNA replication	20	-0.826247	-2.4798	1.5514e-09	3.32026e-08	1.94405e-08	1128	tags=65%, list=4%, signal=62%	9400/84296/3159/4174/51659/64785/4175/9401/4172/4173/641/4176/4171
BP	GO:0050678	regulation of epithelial cell proliferation	307	0.353777	1.90767	1.56696e-09	3.34441e-08	1.95819e-08	3421	tags=29%, list=14%, signal=25%	1893/6387/2658/6422/7010/654/84913/653/2152/1910/3162/185/3397/94/7538/4804/4070/3357/677/7049/8742/659/864/728/6347/7057/26051/6369/4609/5293/7075/567/6774/3091/60485/7039/55081/1285/5764/4824/8837/23411/2625/1027/57142/10413/595/3164/687/9104/5728/240/7472/1028/1021/80173/7424/1535/64919/5176/3725/4163/6899/27152/207/49860/151306/5654/55840/5797/6678/8829/55294/54206/4208/6591/5925/2752/3676/80…
CC	GO:0005684	U2-type spliceosomal complex	79	-0.58017	-2.3611	1.59011e-09	3.38459e-08	1.98172e-08	4330	tags=53%, list=17%, signal=44%	4236/57461/25766/10286/23658/84811/10907/24148/55234/6634/6629/9775/6627/153527/8175/55696/51340/27336/27339/6636/26121/84950/9128/10946/11338/8896/10992/9129/6633/22794/51645/1659/9343/6628/10262/57819/6635/8449/6637/24144/6631/25804
BP	GO:0036230	granulocyte activation	41	0.678745	2.64969	1.70535e-09	3.62006e-08	2.11959e-08	3591	tags=66%, list=14%, signal=57%	1776/11314/11027/1511/84106/6352/4615/2207/7305/6844/820/301/729230/6372/3600/6688/2213/306/3689/6348/57580/6850/5320/7124/3684/6814/5724
BP	GO:0002455	humoral immune response mediated by circulating immunoglobulin	47	0.656749	2.60183	1.74707e-09	3.69858e-08	2.16557e-08	3734	tags=53%, list=15%, signal=45%	730/713/1378/715/712/1604/714/51279/3543/975/710/716/3426/735/4153/729/1191/10747/722/325/2213/5788/3263/7124/731
BP	GO:0046632	alpha-beta T cell differentiation	104	0.512494	2.37624	1.79951e-09	3.79934e-08	2.22456e-08	3997	tags=47%, list=16%, signal=40%	4092/8809/5734/8320/7048/3142/942/114836/864/639/3702/114548/6363/6774/301/4063/3594/6095/596/3662/2737/2625/7704/7535/91543/2841/3122/64919/3707/10538/6146/3569/64218/3566/3565/84695/6778/604/3659/11006/10892/944/6850/941/3593/9760/57630/159296/84807
BP	GO:0002687	positive regulation of leukocyte migration	132	0.466042	2.23828	1.85158e-09	3.89876e-08	2.28277e-08	3601	tags=33%, list=14%, signal=29%	10894/6387/1230/64805/2358/1436/63940/6403/3554/81704/6352/5641/5880/199/728/7057/6369/6366/6363/58494/719/729230/2621/80310/1240/1906/5764/972/961/6688/59341/6504/7424/3569/83700/3565/3958/6348/245937/3676/2185/7124/5724/57118
BP	GO:0050728	negative regulation of inflammatory response	133	0.468826	2.25642	1.93706e-09	4.06783e-08	2.38176e-08	3421	tags=37%, list=14%, signal=32%	7010/8530/2358/284207/5740/5734/2294/2534/7133/9314/3082/7132/313/7538/9021/4889/57817/1003/114548/3055/2950/9971/89790/58189/64838/6095/2625/2268/8993/79626/240/135/325/2213/5176/4067/140885/3565/5788/3949/5925/6288/6850/4790/5598/3479/3559/335/3593
BP	GO:0050730	regulation of peptidyl-tyrosine phosphorylation	239	0.384504	2.01244	1.9991e-09	4.1809e-08	2.44797e-08	3448	tags=31%, list=14%, signal=27%	4908/11314/6422/353514/654/920/5621/1436/64092/2534/3059/975/3082/7132/9021/6352/148/3815/5649/653361/4739/64581/56034/960/2621/80310/3572/7039/2690/9467/948/3717/972/3600/84619/2322/5336/3084/285489/916/2056/2674/10464/3689/4067/10507/5175/8692/3569/3565/5788/8829/55294/11006/58533/54206/56940/1489/6850/10019/1742/79705/57732/2185/941/2255/3263/3479/3690/7124/284/5663/3593/3574
BP	GO:0044283	small molecule biosynthetic process	494	0.311325	1.74572	2.00158e-09	4.1809e-08	2.44797e-08	4654	tags=35%, list=18%, signal=29%	1621/654/2687/5322/133/6916/653/1571/5743/5740/51302/2308/4837/5947/5360/1544/5166/220/3553/9517/1576/51380/23417/4056/114876/1080/2950/4942/301/9971/27122/1559/2681/27010/51141/10613/54511/79966/1906/10157/4522/5105/2643/8720/5341/5805/23411/972/6622/2946/37/8803/10170/1491/6615/6296/467/84869/8564/8604/27165/5730/9104/5336/240/4353/445/64577/10998/241/60496/1558/1806/3155/5031/1582/1036/3953/10…
MF	GO:0030546	signaling receptor activator activity	445	0.322037	1.79565	2.02188e-09	4.21207e-08	2.46622e-08	5478	tags=31%, list=22%, signal=25%	10584/6387/2658/6368/4908/90865/654/6359/10148/133/9535/9547/653/284207/1511/3082/6320/6352/8742/146225/57817/659/8074/6347/6369/3553/4803/6366/6363/112616/7043/2797/56034/5368/116/2621/80310/3603/6372/7039/10673/356/26281/388372/10435/1906/5764/434/64388/3600/4982/2920/414062/649/7472/3084/796/92304/5443/58191/8600/7424/2056/959/2202/7481/5020/3445/10507/3569/117579/4969/64218/3565/3958/6349/225…
BP	GO:0035710	CD4-positive, alpha-beta T cell activation	92	0.538059	2.43152	2.20083e-09	4.5727e-08	2.67737e-08	4351	tags=48%, list=17%, signal=40%	4092/11126/8809/1604/5734/975/7048/3142/942/114836/864/114548/6363/4818/6774/301/4063/3125/3594/6095/3662/2625/91543/384/3122/57045/10538/5588/3569/64218/3566/3565/84695/6778/604/10892/941/3593/9760/57630/159296/84807/57089/177
BP	GO:0071560	cellular response to transforming growth factor beta stimulus	227	0.387076	2.01132	2.355e-09	4.88008e-08	2.85735e-08	3193	tags=29%, list=13%, signal=25%	5138/6422/4091/2022/7123/8483/9719/4092/9839/10253/11117/3397/2534/1398/269/94/8425/7048/677/7049/2530/65997/1003/7057/2615/7043/2331/2353/678/6774/10979/26524/27122/80310/4093/2908/10370/1906/8837/23411/83891/9404/6688/6386/7472/10252/1028/7122/255743/57045/3725/64081/8692/8516/3565/5654/2201/58533/56940/4208/9958/80139/22938/54361/5598
BP	GO:0120254	olefinic compound metabolic process	149	0.448205	2.19961	2.40942e-09	4.96657e-08	2.90799e-08	2721	tags=33%, list=11%, signal=30%	654/133/6916/9227/653/1571/5743/1910/5740/113612/125/1544/5959/220/127/1576/2950/124/27122/1559/8529/1555/83875/54884/2946/10170/8608/5730/240/1549/130/64577/1558/126/1565/9249/30/1543/6716/6715/57406/1958/158584/8228/1548/2053/216/284541/66002
BP	GO:0071356	cellular response to tumor necrosis factor	198	0.416682	2.11024	2.40458e-09	4.96657e-08	2.90799e-08	4477	tags=40%, list=18%, signal=33%	1393/6368/6422/6359/11093/83643/7133/7132/7538/6352/4780/677/10365/57817/6347/7057/6369/6366/6363/834/608/678/2950/820/9971/2621/2167/10673/388372/1906/3717/355/4824/5105/6095/23411/2625/414062/445/28512/796/8600/1535/5516/255743/7805/2819/7412/8692/207/1540/6349/6348/10670/6850/7189/9447/4790/2185/3037/27242/335/7124/6362/6357/10594/2635/5106/6517/3551/837/3611/3280/10010/9590/55022/6360/2309/19…
BP	GO:0032200	telomere organization	119	-0.514724	-2.21564	2.41932e-09	4.97388e-08	2.91227e-08	4935	tags=47%, list=20%, signal=38%	9894/5514/2547/10111/3320/2072/51002/10694/25913/9937/65057/6672/7486/26272/6714/51750/7015/8658/1763/225689/10574/5111/8550/64421/6119/10576/4216/55226/50485/22948/908/5981/1736/328/10575/5889/7515/54552/3326/286053/7517/23381/898/5591/24144/80119/9401/142/7203/9156/9134/2237/4751/641/9212/2146
BP	GO:0031589	cell-substrate adhesion	332	0.347982	1.88634	2.45817e-09	5.04054e-08	2.9513e-08	4198	tags=32%, list=17%, signal=27%	10894/3680/10516/6422/4091/7010/558/11093/59277/11117/10319/6614/3397/2294/9748/1398/8631/22998/94/4070/10580/2824/1842/11170/5880/10461/90102/7057/10855/6366/2042/4739/10174/960/59339/10979/30008/2621/54453/10225/948/3681/9806/3717/25890/201294/596/91663/64098/11151/9404/79778/63923/5728/84168/6237/916/55742/1021/255743/3913/3689/7450/7412/5295/8516/83700/1793/83706/604/8829/967/6548/64005/482/5…
BP	GO:1903556	negative regulation of tumor necrosis factor superfamily cytokine production	56	0.611402	2.52345	2.60036e-09	5.31818e-08	3.11386e-08	5676	tags=61%, list=23%, signal=47%	558/945/11213/7099/26191/2950/9971/2621/23405/2841/6504/5443/384/50856/84868/140885/3565/11006/54206/23547/3479/245928/706/1139/10457/23208/409/3965/4057/51738/29126/1149/671/7128
BP	GO:0010959	regulation of metal ion transport	348	0.339951	1.85761	2.85311e-09	5.81989e-08	3.40761e-08	2782	tags=24%, list=11%, signal=22%	6387/1230/353514/53826/10288/920/1318/51185/5621/5743/11027/1193/288/945/2534/2273/10268/6352/5142/57817/4846/6347/6324/387129/5144/2040/2669/7881/4638/6844/567/5294/3270/5023/126306/3603/5999/3306/8832/7852/596/9474/6622/2946/28954/11151/5311/2149/9104/5336/135/54800/2745/816/477/5031/3753/1535/2056/5187/57165/5348/4067/468/30820/3741/207/287/115352/23479/9446/30845/3958/6330/2258/967/79026/6348…
BP	GO:0001935	endothelial cell proliferation	135	0.453743	2.19482	3.02622e-09	6.15698e-08	3.60499e-08	4810	tags=41%, list=19%, signal=34%	1893/6387/2658/7010/654/84913/2152/3162/185/94/4804/3357/8742/659/6347/7057/26051/6369/5293/7075/6774/3091/1969/60675/2081/1285/23411/3164/240/7472/7424/1535/3725/207/5797/6678/8829/168667/4208/3676/5613/3690/335/7124/3593/1232/857/79400/1960/2247/283/383/116844/7026/2260/10000
BP	GO:0002708	positive regulation of lymphocyte mediated immunity	105	0.496511	2.31511	3.08631e-09	6.26297e-08	3.66704e-08	3726	tags=42%, list=15%, signal=36%	11126/8809/912/3824/1604/3554/695/975/117157/114836/10666/114548/3553/10125/567/3133/3822/4068/3125/3594/2625/7409/3823/91543/3106/6504/3136/3122/3134/3569/3565/5788/6778/3902/3805/10892/8417/7189/3263/259197/7124/3593/563/911
BP	GO:0050731	positive regulation of peptidyl-tyrosine phosphorylation	176	0.421994	2.11047	3.12663e-09	6.3284e-08	3.70535e-08	3421	tags=32%, list=14%, signal=28%	4908/353514/654/920/5621/1436/2534/3059/975/3082/7132/6352/148/3815/5649/653361/4739/64581/960/2621/3572/7039/2690/948/3717/972/3600/2322/5336/3084/285489/916/2056/2674/10464/4067/10507/5175/3569/3565/5788/8829/55294/1489/6850/1742/79705/2185/941/2255/3263/3479/3690/7124/284/3593
BP	GO:0019882	antigen processing and presentation	99	0.511667	2.35125	3.41981e-09	6.88621e-08	4.03196e-08	4122	tags=43%, list=16%, signal=36%	10288/10332/912/30835/925/5641/10875/1520/7057/51762/6366/6363/2207/567/3133/3125/7454/968/9474/972/3106/3115/5870/3136/3113/50856/2213/3122/3134/3111/3117/9363/3109/3126/7189/6556/55207/3119/563/911/1236/3551/3108
MF	GO:0008201	heparin binding	147	0.447307	2.18836	3.4166e-09	6.88621e-08	4.03196e-08	5072	tags=44%, list=20%, signal=35%	84870/6368/6422/7123/6359/6403/1511/83716/9510/1842/7049/7057/5118/6402/5549/340419/91522/30008/9353/6372/2160/5764/5048/64388/6649/56925/4353/59352/64094/6146/5553/5788/3990/284654/8829/11167/3075/4018/6288/11095/6586/5046/2255/7705/334/27329/566/51144/1305/351/7058/10457/4043/51156/2252/2247/283/116519/84570/2260/2249/4057/350/7059
CC	GO:0070820	tertiary granule	149	0.446366	2.19058	3.59485e-09	7.22013e-08	4.22747e-08	5185	tags=42%, list=21%, signal=34%	5199/11314/10288/2357/2358/5547/160364/1378/3043/945/5787/1604/79895/5768/5799/1520/1536/2207/2040/1471/567/820/6515/374403/8993/961/963/11026/8773/1535/25840/3689/3240/140885/2495/3958/51552/8987/8417/23191/6947/6556/1265/3684/6814/5724/7077/126014/11322/4317/170482/5236/22918/3071/8778/116844/4057/978/51646/81619/25797/5473/427
BP	GO:1902100	negative regulation of metaphase/anaphase transition of cell cycle	40	-0.68695	-2.40387	3.68906e-09	7.39039e-08	4.32716e-08	2695	tags=55%, list=11%, signal=49%	84861/348654/10459/701/7756/9183/5885/7517/10403/26271/55755/55055/9735/4085/81620/11130/9319/1063/699/891/9212/7272
MF	GO:0003678	DNA helicase activity	63	-0.617337	-2.41105	3.92344e-09	7.83987e-08	4.59034e-08	2209	tags=63%, list=9%, signal=58%	55636/10973/2547/10111/165545/7486/51750/10856/1763/6832/5982/57680/79075/1108/84515/83990/56897/9400/2071/1663/8438/8607/5985/54821/1660/4174/9557/63922/5983/4175/80119/25788/9401/4172/5984/4173/641/4176/4171/10721
CC	GO:0005874	microtubule	351	-0.377465	-1.83848	4.07993e-09	8.13183e-08	4.76128e-08	4590	tags=33%, list=18%, signal=27%	22920/79848/667/1770/808/80258/158135/6683/7278/10694/7846/7280/6840/79643/5605/1641/8514/1778/51199/64837/27067/23046/3799/11104/2010/2801/64446/91752/27175/10540/27130/10574/6902/84861/27019/284076/4134/9576/90990/10297/10576/10808/10726/4296/10300/56890/4957/55920/1453/23291/27436/2288/22948/3796/908/4976/150465/55835/8655/58526/4133/80279/23093/1639/27229/203068/10575/84790/7756/9183/23623/10…
BP	GO:0019722	calcium-mediated signaling	181	0.423593	2.12631	4.10172e-09	8.15451e-08	4.77456e-08	3689	tags=34%, list=15%, signal=29%	55273/1230/920/64805/2358/5621/1910/185/1193/6403/695/3357/10663/2274/1827/64581/729230/3270/374403/1240/10231/50852/1906/7852/6401/5341/2946/7535/120892/6444/4772/10316/9104/5336/5530/3084/5443/916/477/8600/9451/79054/84174/7412/287/2833/9446/5533/5788/6348/6548/58529/6850/57192/2185/5598/3479/7124/10803/566/23261
MF	GO:0020037	heme binding	124	0.470415	2.23376	4.24834e-09	8.42462e-08	4.93272e-08	3720	tags=40%, list=15%, signal=34%	79689/6916/1571/5743/3162/5740/113612/51302/3040/3043/114757/7837/1544/124936/4846/50865/1536/6392/1576/55640/1559/8529/1592/6999/1555/3717/847/10424/3047/4353/1549/3048/1558/1582/1535/1565/1543/1593/64816/1548/284541/66002/5742/285440/6821/875/23593/3042/1551
BP	GO:0032731	positive regulation of interleukin-1 beta production	56	0.607174	2.506	4.30322e-09	8.5119e-08	4.98382e-08	4880	tags=57%, list=19%, signal=46%	353514/11027/4615/7099/114548/6363/3428/834/7305/149628/6774/64581/51311/948/3717/58484/115362/3569/1958/6348/10892/9447/10333/7124/24145/566/55655/351/177/3098/4332/3965
BP	GO:0002286	T cell activation involved in immune response	110	0.49515	2.31714	4.46199e-09	8.80372e-08	5.15468e-08	3504	tags=38%, list=14%, signal=33%	4092/8809/5734/8320/975/3142/942/114836/10875/114548/6363/2207/6774/301/4063/3594/5105/6095/3662/2625/972/6194/2213/3122/10538/3445/84868/3569/3109/64218/3566/3565/3958/84695/6778/604/10892/6556/941/5663/3593/3456
BP	GO:1901606	alpha-amino acid catabolic process	83	0.536949	2.39121	4.51018e-09	8.87645e-08	5.19727e-08	4761	tags=57%, list=19%, signal=46%	4846/51166/443/51380/3242/4942/4329/54511/6999/10157/2954/8564/27165/6898/64577/384/3155/3712/4143/1036/549/6470/5860/2746/137872/2875/2752/84706/51268/875/64902/2805/2653/8942/10993/11112/58510/38/26275/5053/8659/2184/1743/36/383/1757/5009
BP	GO:2001252	positive regulation of chromosome organization	77	-0.576257	-2.33458	4.60259e-09	9.0356e-08	5.29046e-08	6280	tags=60%, list=25%, signal=45%	51548/11284/3178/7175/9587/26354/1499/545/80063/5514/10111/6742/10694/25913/65057/26272/51750/8658/25942/225689/10574/8550/10576/4216/1017/22948/51535/908/10155/1736/10575/5885/1663/286053/22880/1786/9869/9918/10592/7203/81620/2237/4751/64151/9212/10051
BP	GO:0070098	chemokine-mediated signaling pathway	79	0.545558	2.39283	4.66136e-09	9.12811e-08	5.34462e-08	4311	tags=42%, list=17%, signal=35%	6387/6368/1230/6359/6352/10663/6347/6369/6366/6363/3091/729230/9353/6372/1240/388372/1906/7852/2920/414062/2833/2296/6349/6348/6586/10019/2185/6362/10803/6357/1236/1232/6360
BP	GO:0051051	negative regulation of transport	379	0.332643	1.82843	4.7405e-09	9.25993e-08	5.4218e-08	5161	tags=37%, list=21%, signal=30%	1393/11314/6422/10288/51185/5743/3162/1193/288/945/2294/7133/7132/2824/4889/57817/8074/4846/7057/387129/4609/415116/3553/2669/7881/2042/301/729230/10550/8529/7097/5999/50852/948/8832/1906/22925/596/9474/972/6622/2946/28954/5997/11151/5311/961/120892/2149/6688/6386/91543/5728/150696/5530/83452/3598/3084/4129/5359/477/8291/3753/2056/2213/3134/5020/468/140885/207/51569/2697/3033/23479/9446/9525/3958…
BP	GO:0018205	peptidyl-lysine modification	306	-0.390713	-1.87908	4.78439e-09	9.32242e-08	5.45839e-08	3921	tags=30%, list=16%, signal=26%	6878/1487/5987/55929/26276/4801/6612/10856/200186/10664/80764/55870/5352/29072/205564/25942/4017/7862/10363/4193/23551/29104/2641/60/6804/6830/59343/6873/3094/1387/54799/7329/30827/55124/10401/4602/8535/54554/4802/23409/10919/51742/7341/84661/6885/9739/26147/51588/10902/63925/64754/56943/23168/10155/51547/6877/10269/4221/11091/86/5905/55689/6874/5929/54552/56970/6598/4000/286053/26009/3054/8607/1…
BP	GO:0030099	myeloid cell differentiation	335	0.34383	1.8711	4.83417e-09	9.39604e-08	5.5015e-08	3421	tags=30%, list=14%, signal=26%	51266/6422/1230/920/1436/2124/714/2113/3059/975/7048/7538/677/7049/10365/3726/7099/55509/5153/212/4609/3815/6363/4495/3428/5293/9935/211/92/1441/7305/7098/567/2353/6774/2034/3091/28514/3398/54861/1969/7097/9770/3394/10370/3717/10272/5048/3662/23411/2625/3635/972/7704/139716/11025/3600/6688/4920/7107/10234/6194/25979/3665/29887/1028/5457/8600/1021/2056/325/3707/3725/10538/9855/4067/5295/116071/103…
BP	GO:0051310	metaphase plate congression	55	-0.628334	-2.36949	5.4341e-09	1.05192e-07	6.15912e-08	3990	tags=56%, list=16%, signal=48%	79998/4292/79643/1778/23212/81929/10540/23636/10726/27436/150465/55166/9183/84722/10403/83540/10615/81930/8697/81620/3619/81610/1062/9928/1063/11004/891/9212/55143/3833/113130
BP	GO:1902107	positive regulation of leukocyte differentiation	145	0.446049	2.18039	5.45231e-09	1.05192e-07	6.15912e-08	4082	tags=40%, list=16%, signal=34%	1230/558/10288/920/1378/2124/695/3059/7048/3142/942/677/864/114548/6363/10125/3575/7305/2353/301/3398/2621/939/3594/2736/5105/2737/2625/3635/972/7704/7535/3600/4920/5457/8600/3122/3707/3566/3565/5788/604/11006/5925/10892/6850/7189/941/3559/7124/7071/3593/3574/8111/9760/1385/84807/2242
BP	GO:1903708	positive regulation of hemopoiesis	145	0.446049	2.18039	5.45231e-09	1.05192e-07	6.15912e-08	4082	tags=40%, list=16%, signal=34%	1230/558/10288/920/1378/2124/695/3059/7048/3142/942/677/864/114548/6363/10125/3575/7305/2353/301/3398/2621/939/3594/2736/5105/2737/2625/3635/972/7704/7535/3600/4920/5457/8600/3122/3707/3566/3565/5788/604/11006/5925/10892/6850/7189/941/3559/7124/7071/3593/3574/8111/9760/1385/84807/2242
BP	GO:0048771	tissue remodeling	152	0.439227	2.14997	5.77098e-09	1.11067e-07	6.50308e-08	3547	tags=34%, list=14%, signal=30%	84870/6422/1621/558/9464/1436/94/5166/57817/659/4846/7043/7075/1471/2034/3091/729230/1969/9770/5764/9474/3635/952/4313/3600/4982/2149/7107/5530/3988/796/29887/8600/3953/3488/3569/2697/2296/6694/154/4208/5340/6850/7189/79705/2185/2255/3690/3593/91355/3574/9842
BP	GO:0002761	regulation of myeloid leukocyte differentiation	105	0.491797	2.29313	5.89035e-09	1.1281e-07	6.60513e-08	3614	tags=38%, list=14%, signal=33%	6422/1230/920/2124/714/3059/677/7099/4609/9935/7305/7098/2353/3398/9770/10272/3635/972/11025/4920/7107/10234/3665/5457/8600/1021/325/4067/5295/3565/6348/55294/11006/5925/7189/1051/7124/7071/3593/8111
MF	GO:1901681	sulfur compound binding	234	0.385683	2.01363	5.88827e-09	1.1281e-07	6.60513e-08	4786	tags=39%, list=19%, signal=32%	84870/6368/6422/7123/6359/6403/5306/1511/83716/9510/1842/2947/7049/2639/7057/5118/4035/6402/5549/2950/340419/91522/30008/4329/5023/27010/9353/6372/26281/2160/5764/5048/2946/64388/37/6649/56925/4353/53354/309/59352/64094/6146/55753/33/27232/134526/5553/5788/3990/284654/8829/11167/3075/7172/4018/6288/11095/6586/5046/2255/79777/7705/1809/2944/875/32/334/27329/5095/566/5091/51144/1305/1629/351/7058/1…
BP	GO:0019216	regulation of lipid metabolic process	286	0.358246	1.91308	5.90492e-09	1.12813e-07	6.60533e-08	4056	tags=33%, list=16%, signal=28%	7010/5156/654/64805/83643/133/2358/653/5743/185/975/5166/10580/3357/54658/3815/3553/6366/6363/23417/3490/5294/301/9971/3398/27122/9611/51141/1389/10613/7069/5105/6095/53345/8720/6653/23411/2268/972/6622/37/6615/29103/2322/9104/5336/2170/113791/345275/376497/64919/10464/11160/4067/10451/207/57406/1958/33/5447/83752/2053/3949/55294/5343/6591/347/337/66036/5660/4790/2185/2672/54361/6720/7376/335/712…
BP	GO:0045841	negative regulation of mitotic metaphase/anaphase transition	38	-0.69914	-2.43493	5.945e-09	1.13302e-07	6.63398e-08	2695	tags=58%, list=11%, signal=52%	84861/348654/10459/701/7756/9183/5885/7517/10403/26271/55755/55055/9735/4085/81620/11130/9319/1063/699/891/9212/7272
BP	GO:0002688	regulation of leukocyte chemotaxis	109	0.486637	2.27853	6.07374e-09	1.15475e-07	6.76118e-08	4014	tags=37%, list=16%, signal=31%	6387/1230/2358/1436/63940/6352/5641/5880/199/728/6347/7057/6366/6363/719/729230/2621/9353/1240/1906/5764/972/6688/2841/59341/6504/4354/7424/4067/3569/83700/3565/6348/245937/2185/79890/1843/57118/4681/1236
BP	GO:0051784	negative regulation of nuclear division	53	-0.641043	-2.39531	6.32325e-09	1.19927e-07	7.02189e-08	3064	tags=49%, list=12%, signal=43%	1761/84861/348654/10459/701/7756/9183/5885/7517/10403/27085/26271/55755/55055/9735/4085/1111/81620/11130/9319/1063/286151/699/891/9212/7272
BP	GO:0006338	chromatin remodeling	159	-0.46771	-2.09368	6.59443e-09	1.24769e-07	7.30535e-08	3969	tags=40%, list=16%, signal=34%	2186/144108/55929/10856/22955/29072/50809/23421/9025/8289/4798/60/4676/6830/6749/29844/55193/4602/79913/11164/57798/6599/9219/3065/57680/23198/1108/6601/64754/4678/5058/57459/1616/8019/86/9031/51377/55689/3169/6598/57504/3159/10036/3054/401541/6597/54108/22880/8607/11198/9557/11335/8208/6602/23234/10445/11339/54107/6944/3070/4171/55723/55355
BP	GO:0033047	regulation of mitotic sister chromatid segregation	43	-0.665396	-2.37708	7.03906e-09	1.3286e-07	7.77912e-08	2695	tags=53%, list=11%, signal=48%	84861/348654/10459/701/7756/9183/5885/7517/10403/26271/55755/55055/9735/4085/81620/11130/9319/1063/699/891/9212/9232/7272
BP	GO:0033046	negative regulation of sister chromatid segregation	40	-0.681952	-2.38638	7.10775e-09	1.33194e-07	7.79866e-08	2695	tags=57%, list=11%, signal=51%	84861/348654/10459/701/7756/9183/5885/7517/10403/26271/55755/55055/9735/4085/81620/11130/9319/1063/699/891/9212/9232/7272
BP	GO:0033048	negative regulation of mitotic sister chromatid segregation	40	-0.681952	-2.38638	7.10775e-09	1.33194e-07	7.79866e-08	2695	tags=57%, list=11%, signal=51%	84861/348654/10459/701/7756/9183/5885/7517/10403/26271/55755/55055/9735/4085/81620/11130/9319/1063/699/891/9212/9232/7272
BP	GO:2000816	negative regulation of mitotic sister chromatid separation	40	-0.681952	-2.38638	7.10775e-09	1.33194e-07	7.79866e-08	2695	tags=57%, list=11%, signal=51%	84861/348654/10459/701/7756/9183/5885/7517/10403/26271/55755/55055/9735/4085/81620/11130/9319/1063/699/891/9212/9232/7272
BP	GO:2001251	negative regulation of chromosome organization	75	-0.581899	-2.35169	7.14226e-09	1.33521e-07	7.81782e-08	2695	tags=43%, list=11%, signal=38%	84861/348654/10459/55226/701/9031/7515/7756/9183/54552/5885/9700/7517/10403/26271/55755/55055/80119/142/9735/4085/81620/11130/9319/1063/4171/699/891/9212/9232/7272/7153
BP	GO:0022616	DNA strand elongation	30	-0.740316	-2.41987	7.29116e-09	1.3598e-07	7.9618e-08	4827	tags=80%, list=19%, signal=65%	10111/5426/25913/7015/10856/1763/4798/5111/29844/79913/10714/86/51377/3978/8607/5422/3980/10445/5983/54107/4172/5984/4173/4176
BP	GO:0007127	meiosis I	94	-0.535313	-2.23103	7.75418e-09	1.44272e-07	8.44729e-08	4827	tags=45%, list=19%, signal=36%	10111/10018/2072/56159/56154/4292/80198/27030/5719/1761/55124/10919/79703/51547/83990/7589/29988/116138/29893/5889/11077/5885/8438/9700/10403/84057/4439/146956/898/26271/80010/25788/9319/2177/9134/994/10635/1164/6790/9232/9133/7153
BP	GO:0060627	regulation of vesicle-mediated transport	490	0.303166	1.69991	7.90183e-09	1.46671e-07	8.58774e-08	3619	tags=26%, list=14%, signal=23%	10584/4908/11314/78989/8547/2220/558/5322/2358/3162/6441/2619/2294/84106/2219/148/5880/10461/84896/6347/51762/929/3553/6366/6363/2207/3055/143425/4035/3560/1794/6844/2042/567/1080/64581/301/56681/28514/3822/729230/5023/2621/7097/57111/83849/948/8832/4153/201294/6401/8720/9474/6653/2268/6622/11151/107/3600/8867/961/120892/6688/11037/30846/6386/640/150696/5336/5530/9501/6504/83452/81555/11031/3598/…
CC	GO:0098798	mitochondrial protein-containing complex	210	-0.430738	-1.99372	8.01012e-09	1.48329e-07	8.68486e-08	5510	tags=46%, list=22%, signal=36%	9553/345778/51073/8802/116540/65993/54534/4709/84419/6391/4722/55967/5162/51318/28977/64979/23107/51650/3313/1350/51258/4723/7384/55735/29093/84303/4711/64949/51081/63875/29074/4696/64960/79135/51021/11222/387338/63899/3421/4713/54460/581/6150/7381/122704/56993/3420/54539/6832/65003/64965/1340/28998/64951/139322/54927/1329/1337/84701/4698/64963/55168/4728/64969/51264/65005/55669/1345/740/10939/10…
BP	GO:0002707	negative regulation of lymphocyte mediated immunity	54	0.613859	2.51377	8.22874e-09	1.52018e-07	8.90085e-08	4880	tags=52%, list=19%, signal=42%	339390/4092/1378/3824/1604/1398/3575/3133/10225/3821/3106/6504/722/2213/3134/84868/5788/604/11006/3805/56940/3456/5272/5532/383/3071/409/3965
CC	GO:0000502	proteasome complex	57	-0.63012	-2.39661	9.57546e-09	1.76481e-07	1.03332e-07	6336	tags=70%, list=25%, signal=53%	5720/5886/5721/143471/5694/5718/9097/5700/90637/5714/5704/5706/5717/5682/10213/5715/5719/5689/5716/3315/11047/5690/5709/5686/29979/5702/23198/5687/7415/51377/5701/5695/5693/10197/9690/5708/5692/5707/5710/5691
MF	GO:0042393	histone binding	206	-0.431558	-1.98696	9.64235e-09	1.77297e-07	1.0381e-07	3658	tags=33%, list=15%, signal=29%	8658/2332/23613/7913/22955/80764/139886/23170/10927/23310/9025/91133/56254/4676/6830/6749/54799/30827/7158/65980/8535/222229/54554/6599/57680/10389/169981/1104/26147/23198/1108/83746/6601/84733/4678/2956/11091/1616/8019/84295/9031/80012/23468/55689/5929/55705/26009/6597/5757/9960/1163/11335/8208/11137/51460/23234/23512/9918/90378/6944/29028/29128/54892/8805/90780/4171/1164/55723/55355
BP	GO:0051225	spindle assembly	97	-0.530819	-2.21921	1.05259e-08	1.9309e-07	1.13056e-07	3922	tags=41%, list=16%, signal=35%	4292/79643/55125/8658/1778/11200/8841/2801/225689/3304/4733/90990/1453/1104/3796/27229/203068/7756/10274/9371/10403/26271/10615/3619/3832/24137/4751/9493/56992/29899/6790/9212/22974/29901/29127/9133/991/9055/3833/259266
BP	GO:1901653	cellular response to peptide	327	0.34869	1.88581	1.10336e-08	2.0193e-07	1.18233e-07	5218	tags=40%, list=21%, signal=32%	1393/2358/5621/185/2308/3397/2534/1398/5166/4804/10580/9021/5641/8835/4780/677/10365/9349/7099/26191/51762/4609/3553/4035/81565/6844/6774/9971/8615/51141/23641/2690/948/1906/3717/5105/8837/6653/23411/7431/8462/3164/64506/445/11031/2642/23484/5327/376497/1535/2213/3716/4067/7412/5295/5588/4149/3484/207/23621/6715/2697/5447/4929/6778/6548/58533/54206/1394/9734/2875/896/154/5925/2549/3676/5791/55625…
CC	GO:0030666	endocytic vesicle membrane	188	0.404606	2.03955	1.12921e-08	2.06179e-07	1.2072e-07	3531	tags=33%, list=14%, signal=29%	8685/9332/55576/920/115677/6456/23166/55647/5880/4846/51762/4481/1536/143425/3575/1441/4035/83547/7096/6844/567/1080/3133/7039/7097/3125/948/9474/972/11151/4920/915/3106/3115/11031/8773/816/3136/9367/3113/10618/1535/3122/3134/306/3117/84329/4067/3949/154/3126/57192/1742/9341/6556/50489/54361/59272/10333/5289/3119/3633
BP	GO:0010543	regulation of platelet activation	42	0.667957	2.60238	1.1438e-08	2.08357e-07	1.21996e-07	3247	tags=50%, list=13%, signal=44%	5156/114897/22915/6403/1511/7056/4846/7099/2207/7294/3572/3717/5341/640/4067/5588/3569/18/6850/10019/2811
BP	GO:0008202	steroid metabolic process	294	0.352517	1.88997	1.23766e-08	2.24933e-07	1.31701e-07	5603	tags=41%, list=22%, signal=33%	5156/654/133/653/1571/1910/9023/185/1071/51302/1544/5641/319/2099/8074/3931/5959/54658/3815/54657/1576/3290/3490/114876/1080/114879/9971/27122/1559/51141/1592/10613/1555/6095/8720/847/23411/37/25987/10170/6615/8608/7436/3988/10998/1558/1582/54659/3953/10449/1565/30/11160/25976/1543/1593/64816/6716/6715/5087/1958/33/3294/5447/3565/1548/3990/2053/3949/6591/2230/337/285440/6609/4790/2672/54361/6720/…
BP	GO:0035150	regulation of tube size	132	0.447725	2.15031	1.29355e-08	2.34546e-07	1.3733e-07	6158	tags=46%, list=24%, signal=35%	147/1621/6915/133/6916/5743/1910/185/148/3357/10365/27345/659/4846/10800/5023/1906/342527/2643/3778/9474/952/4313/5997/2149/6649/135/796/477/3363/3741/2296/9732/153/154/4883/59272/7124/151/10911/2244/3352/2729/1373/857/552/1908/5345/150/6546/1909/7484/6338/340481/2243/3274/553/155/152/624/186
BP	GO:0006405	RNA export from nucleus	68	-0.580897	-2.30123	1.2986e-08	2.34917e-07	1.37547e-07	5854	tags=59%, list=23%, signal=45%	7175/55795/6741/8106/26993/23279/9688/54830/55677/80145/22916/29072/23636/84321/6830/9984/79228/7248/9972/55746/2733/56943/29890/23511/11052/8563/26019/65083/8480/57122/4686/9883/9887/1660/79902/23381/11260/5433/57510/9631
BP	GO:0034502	protein localization to chromosome	70	-0.57478	-2.28765	1.31755e-08	2.37797e-07	1.39233e-07	4458	tags=53%, list=18%, signal=44%	55011/10694/25913/65057/7015/8658/10856/10664/29072/10574/221496/10576/222229/55920/84515/22948/51535/908/4436/1736/7415/10575/55166/9183/54552/5885/10403/27085/55055/9735/7203/81620/1058/9212/7272/2146/113130
BP	GO:0006869	lipid transport	336	0.337008	1.83121	1.37757e-08	2.48057e-07	1.4524e-07	4630	tags=32%, list=18%, signal=27%	114897/654/5322/9227/185/1071/5306/79895/5947/28234/5360/51703/319/10350/3931/7057/57088/4481/3553/10351/148229/4035/5375/114876/1080/114879/301/2167/8529/356/80765/11309/948/1906/366/57048/2180/4824/23130/22925/7436/23460/2170/58488/1191/54762/10998/5443/5359/376497/10599/8600/1582/5020/201305/10349/55754/207/346/114786/9525/6554/3990/3949/8273/1394/1376/4018/347/337/6850/286410/4547/81537/5660/…
BP	GO:0002504	antigen processing and presentation of peptide or polysaccharide antigen via MHC class II	31	0.727287	2.63393	1.44737e-08	2.60029e-07	1.5225e-07	4793	tags=68%, list=19%, signal=55%	5641/1520/7057/2207/567/3125/972/3115/3113/2213/3122/3111/3117/3109/3126/7189/55207/3119/3108/3112/8722
BP	GO:0048660	regulation of smooth muscle cell proliferation	128	0.453308	2.15797	1.58505e-08	2.84113e-07	1.66351e-07	4915	tags=46%, list=20%, signal=37%	3486/5743/3162/57447/9510/7048/6352/4889/4615/199/659/4846/7099/7057/4609/7043/3398/30008/5739/80310/2081/1906/3717/1027/4313/3600/5728/5031/1535/2773/3725/3488/10672/3569/207/4969/2697/4208/347/4883/59272/3479/7124/3593/5724/2771/7520/6934/10891/2006/4331/3248/657/2247/283/3596/93649/55512/3480
BP	GO:0001936	regulation of endothelial cell proliferation	120	0.467479	2.20617	1.64265e-08	2.93765e-07	1.72003e-07	4810	tags=41%, list=19%, signal=33%	1893/6387/2658/7010/654/84913/2152/3162/185/94/4804/3357/8742/659/6347/7057/26051/6369/5293/7075/6774/3091/1285/23411/3164/240/7472/7424/1535/3725/207/5797/6678/8829/4208/3676/3690/7124/3593/1232/857/1960/2247/283/383/116844/7026/2260/10000
BP	GO:0071675	regulation of mononuclear cell migration	104	0.493578	2.28854	1.65023e-08	2.94118e-07	1.72209e-07	4452	tags=43%, list=18%, signal=36%	1893/6387/1230/2358/1436/653/81704/1398/6352/5641/199/728/6347/7057/6366/58494/719/6793/729230/2621/80310/9353/1240/961/6688/59341/6504/11035/4067/207/3565/3958/6348/245937/347/3676/2185/7124/1843/4681/1236/351/177/387695/131450
BP	GO:0006364	rRNA processing	167	-0.455814	-2.05241	1.65214e-08	2.94118e-07	1.72209e-07	6127	tags=51%, list=24%, signal=39%	54853/27340/23016/84128/84135/23195/79707/2068/55272/25983/10360/55636/54663/79922/2091/10436/55011/10799/23160/10969/51096/23223/10607/285855/22803/51018/6227/23212/23481/285367/10438/29081/79050/10813/10885/387338/29777/6201/63899/65095/92856/9775/9790/56915/11056/51010/1662/51154/23076/23246/9136/55813/64963/6155/23560/54512/55226/25926/153443/54555/705/27079/55164/117246/55127/10248/23404/557…
CC	GO:0097525	spliceosomal snRNP complex	49	-0.642535	-2.38027	1.74957e-08	3.10757e-07	1.81952e-07	5867	tags=69%, list=23%, signal=53%	6632/51691/83443/84844/51690/10421/25766/23658/10907/24148/6634/6629/6627/153527/8175/27336/6636/26121/10465/9128/10946/10992/9129/6633/6626/9416/9343/6628/57819/6635/6637/10713/6631/25804
BP	GO:0043068	positive regulation of programmed cell death	462	0.309174	1.73205	1.82102e-08	3.22715e-07	1.88954e-07	2628	tags=24%, list=10%, signal=22%	8406/6422/10439/3486/133/11126/5621/5743/3162/5740/3399/2308/388/5915/10687/7133/665/4616/5551/7132/4804/6279/3001/6352/8742/6347/7057/220/1654/4609/81030/10628/5293/7043/7078/7305/7098/64581/301/2627/4170/60485/26524/8575/2934/10550/9353/356/4118/9770/22822/3717/355/4824/5609/22925/3778/23411/8061/3635/6154/6622/7704/4313/8462/6280/7164/120892/3164/1848/8795/6196/467/10912/640/5728/6194/472/6416…
BP	GO:0032720	negative regulation of tumor necrosis factor production	54	0.606878	2.48519	1.8549e-08	3.27977e-07	1.92035e-07	5676	tags=59%, list=23%, signal=46%	558/945/11213/7099/26191/2950/9971/2621/23405/2841/6504/5443/384/50856/84868/140885/3565/11006/54206/23547/3479/245928/706/1139/10457/23208/409/3965/51738/1149/671/7128
BP	GO:1902106	negative regulation of leukocyte differentiation	95	0.500768	2.28818	1.86591e-08	3.29182e-07	1.9274e-07	2662	tags=37%, list=11%, signal=33%	6422/4092/1378/714/3142/10875/864/7099/4609/9935/7098/301/3398/10272/2737/3635/972/8993/11025/7107/10234/1021/325/2213/4067/5295/3566/3565/84695/604/3659/6348/55294/3902/11006
BP	GO:0042119	neutrophil activation	36	0.696843	2.61346	1.88992e-08	3.31922e-07	1.94344e-07	3591	tags=67%, list=14%, signal=57%	1776/11314/11027/1511/84106/6352/4615/2207/7305/820/301/6372/3600/6688/2213/306/3689/57580/6850/5320/7124/3684/6814/5724
MF	GO:0001664	G protein-coupled receptor binding	259	0.367509	1.94042	1.88945e-08	3.31922e-07	1.94344e-07	3767	tags=28%, list=15%, signal=24%	8685/6387/84870/6368/9630/6422/6359/2357/133/9547/5621/1910/185/2534/2775/2219/6352/54102/6347/6369/6366/6363/5144/60485/729230/5368/8321/116/60675/6372/388372/1906/3717/434/2920/4920/6386/414062/7472/9495/135/796/5443/58191/2773/3716/7481/10672/5020/408/117579/582/6349/284654/6348/135138/153/6288/3640/5173/2769/23365/1742/54361/114928/6362/346562/5731/6357/57561/8324/2771/170589
BP	GO:0034308	primary alcohol metabolic process	99	0.495417	2.27658	1.90873e-08	3.34477e-07	1.9584e-07	4625	tags=44%, list=18%, signal=36%	654/9227/653/1910/125/1544/5959/220/127/1576/217/124/27122/27010/27284/128/54884/10170/219/8608/84869/130/1558/126/1565/9249/2819/1543/54363/8228/216/224/54361/3479/6799/6783/151056/1551/57104/1562/57665/6822/5950/6817
BP	GO:1901988	negative regulation of cell cycle phase transition	199	-0.432906	-1.98798	1.94051e-08	3.39286e-07	1.98656e-07	2150	tags=29%, list=9%, signal=27%	7158/9984/10459/27339/79968/1030/65123/1017/701/84936/5933/4436/54962/83990/80279/9656/4221/8563/11073/5883/7756/9183/25896/5885/57551/84126/55159/7517/1386/990/10403/146956/29980/26271/5591/51514/60561/835/55755/672/55055/9735/144455/4085/1111/81620/11130/9319/51512/2177/641/1063/8914/699/891/9212/7272/2146
MF	GO:0003697	single-stranded DNA binding	97	-0.52406	-2.19096	1.9658e-08	3.4218e-07	2.00351e-07	6327	tags=54%, list=25%, signal=40%	5886/3178/7157/6118/4137/5436/56852/4437/3148/84083/10111/2072/6742/25913/9361/4292/54840/5094/63901/5814/6119/7156/50485/10623/84515/3297/8880/5395/3329/23168/4436/5437/57109/5932/10128/1663/8438/5422/55388/1660/4174/55247/4175/10592/9401/4172/10635/4173/641/4176/4171/10051
BP	GO:0034762	regulation of transmembrane transport	488	0.301796	1.6886	1.96285e-08	3.4218e-07	2.00351e-07	4656	tags=29%, list=19%, signal=24%	1393/53826/1318/51185/5621/1193/89822/288/3764/2534/2273/10268/10580/51703/4780/5142/57817/54102/6347/1520/6324/7057/387129/4609/3553/1536/5144/2040/5649/2669/55600/7881/6844/1080/5294/9424/729230/3270/5023/126306/10550/1389/5999/3306/3773/1906/2180/6041/596/3778/25932/9474/6622/2946/28954/5997/11151/65018/5311/2149/9104/5336/6506/93589/54800/2745/3772/477/5031/3753/1535/2056/84329/3790/259232/57…
BP	GO:0034110	regulation of homotypic cell-cell adhesion	32	0.717023	2.60627	2.00094e-08	3.47524e-07	2.03479e-07	4221	tags=62%, list=17%, signal=52%	114897/22915/288/1511/6352/3572/3717/640/8600/3716/4067/5588/3569/18/6850/10019/80139/5962/5329/928
BP	GO:0006968	cellular defense response	52	0.610018	2.46973	2.06792e-08	3.58363e-07	2.09826e-07	3558	tags=46%, list=14%, signal=40%	90865/10288/922/10219/5551/728/3702/653361/7305/3822/4068/729230/50852/8061/3823/135/23643/3812/3808/3805/2185/9437/10803/10871
BP	GO:0032677	regulation of interleukin-8 production	74	0.554807	2.39925	2.12834e-08	3.68019e-07	2.1548e-07	3377	tags=42%, list=13%, signal=36%	2658/2152/11027/945/9314/2219/4615/7099/26191/929/3553/7098/7096/6774/64581/301/7097/51311/972/2149/914/408/8692/3569/307/51744/5788/6850/10333/54106/7124
BP	GO:2000107	negative regulation of leukocyte apoptotic process	47	0.631824	2.50308	2.16091e-08	3.72828e-07	2.18295e-07	2545	tags=45%, list=10%, signal=40%	6387/558/81704/3059/6352/1831/10461/6366/6363/3575/84941/3091/2621/939/972/3665/384/3707/5588/6482/604
BP	GO:0002833	positive regulation of response to biotic stimulus	162	0.427206	2.09995	2.20137e-08	3.78975e-07	2.21894e-07	3504	tags=36%, list=14%, signal=31%	654/5322/2358/11126/912/11027/11117/3824/2534/2219/6352/9450/117157/114836/7099/10666/10125/3055/81030/3428/7305/149628/64581/3133/7294/3822/4068/3125/51311/4153/26057/79132/55601/7409/3823/6688/5336/58484/3665/23643/5359/1535/23328/3134/4067/115362/84868/4064/3902/3805/9958/6850/7189/9447/3263/259197/3593/3456
BP	GO:0006816	calcium ion transport	364	0.328762	1.79873	2.20906e-08	3.79464e-07	2.22181e-07	4656	tags=31%, list=19%, signal=26%	6387/2823/1230/353514/10288/920/5621/5743/1910/11027/1193/945/2534/10268/7178/6352/148/3357/5142/4846/6347/10800/387129/6366/6363/5144/2669/4638/5294/3270/5023/2621/55584/126306/3603/356/5999/3306/8832/1906/7852/596/9474/6622/2946/28954/11151/5311/2149/10316/9104/5336/59341/5530/2701/135/93589/816/477/5031/1535/2056/309/79054/259232/57165/4067/489/55503/3932/287/115352/9446/30845/3958/5788/4308/7…
BP	GO:2000106	regulation of leukocyte apoptotic process	79	0.530732	2.3278	2.27078e-08	3.89213e-07	2.27889e-07	2791	tags=42%, list=11%, signal=37%	6387/558/155038/81704/695/3059/6352/1831/10461/6366/6363/5293/3575/84941/301/3091/2621/939/23411/972/640/5728/3665/384/11035/29124/3707/4067/5588/6482/3958/604/4208
BP	GO:0008033	tRNA processing	95	-0.526424	-2.18758	2.27848e-08	3.89679e-07	2.28162e-07	5366	tags=49%, list=21%, signal=39%	6741/112970/11180/24140/285605/10799/55621/51002/26610/10667/55687/83707/9836/63899/56931/54901/27304/80746/339175/55798/126789/51728/10940/55039/64172/64118/144233/4234/55226/80324/84267/54522/10248/127253/1653/84705/79897/11062/10785/81605/8270/51654/6894/51367/283989/54517/26024
BP	GO:0010517	regulation of phospholipase activity	61	0.579272	2.4381	2.29388e-08	3.91458e-07	2.29203e-07	2168	tags=41%, list=9%, signal=38%	5156/64805/5322/185/942/1902/6352/148/3357/2099/728/3702/3815/4035/301/7294/5330/653145/22925/6401/6622/5997/10316/5031/10672
BP	GO:0000302	response to reactive oxygen species	176	0.408298	2.04198	2.29931e-08	3.91533e-07	2.29247e-07	3193	tags=32%, list=13%, signal=28%	10516/5156/558/1571/3162/3040/3043/388/2395/2534/695/1398/3082/27244/4780/10365/4846/10628/653361/2353/2950/301/3091/80310/2081/948/1906/2643/596/847/23411/8061/4313/65018/5311/120892/6649/4353/84557/11035/5516/3725/3240/8692/3569/3741/140885/207/5151/6778/358/9978/347/337/10935/2185/5598
BP	GO:0097028	dendritic cell differentiation	45	0.645231	2.55774	2.32653e-08	3.95308e-07	2.31457e-07	4880	tags=58%, list=19%, signal=47%	558/10288/7048/55509/6363/2621/3394/3662/6688/2322/640/3106/64343/2213/10538/4067/116071/3565/7189/1051/5663/1236/10202/177/1437/3965
BP	GO:0006805	xenobiotic metabolic process	105	0.479827	2.23731	2.33735e-08	3.96288e-07	2.32031e-07	4625	tags=42%, list=18%, signal=34%	2327/1571/113612/10/1544/6283/2947/316/54658/54657/1576/2950/1559/8529/1592/10249/27284/1555/2180/6095/2946/1549/9/1558/54659/1565/30/1543/5447/9446/1548/66002/7172/2944/6799/2329/1551/1429/1573/1562/7366/6822/8647/6817
BP	GO:0044839	cell cycle G2/M phase transition	128	-0.487513	-2.11693	2.42271e-08	4.09873e-07	2.39986e-07	4492	tags=42%, list=18%, signal=35%	7465/808/51720/283807/27133/8091/51343/23236/571/80174/11200/25942/56658/6873/26233/55920/65123/51400/1017/84936/80279/11073/5889/9088/1019/84930/8317/5885/57504/57551/993/990/10403/29980/995/26271/51514/6502/60561/672/6240/1111/994/641/9928/2305/1063/22976/6790/891/9212/890/9133/9833
BP	GO:0031577	spindle checkpoint signaling	37	-0.678995	-2.34774	2.46418e-08	4.15095e-07	2.43043e-07	2695	tags=54%, list=11%, signal=48%	84861/348654/10459/701/7756/9183/7517/10403/55755/55055/9735/4085/81620/11130/9319/1063/699/891/9212/7272
BP	GO:0033674	positive regulation of kinase activity	424	0.3113	1.72095	2.46319e-08	4.15095e-07	2.43043e-07	4921	tags=36%, list=20%, signal=29%	4908/11314/7010/5156/353514/558/920/64805/10253/2358/5621/1436/975/7048/942/8826/6283/6352/148/3357/659/10461/7099/7057/1654/3815/3553/6366/6363/10125/5649/7075/653361/7098/2042/3937/23533/4739/5294/56034/221472/10979/1969/116/2621/80310/7039/9770/2690/2081/1906/3717/2180/5609/23411/2268/972/1027/6622/65018/5311/595/7164/120892/8795/4920/8313/55507/2322/7436/1191/3084/285489/796/376497/8600/7424/…
BP	GO:0032755	positive regulation of interleukin-6 production	85	0.527226	2.36155	2.67846e-08	4.50222e-07	2.6361e-07	4447	tags=48%, list=18%, signal=40%	90865/353514/10288/11027/4615/199/7099/3553/7305/7098/7096/6774/64581/3603/7097/51311/948/972/64135/2149/5336/59341/5450/1535/5452/8692/3569/114900/4155/6850/7189/10333/3556/54106/7124/5724/23765/64170/351/177/4317
BP	GO:0045930	negative regulation of mitotic cell cycle	183	-0.436631	-1.98059	2.73803e-08	4.59251e-07	2.68897e-07	1691	tags=28%, list=7%, signal=26%	1030/65123/1017/701/84936/5933/4436/54962/80279/9656/11073/5883/7756/9183/5885/57551/90806/23513/55159/7517/1386/990/10403/27085/9368/146956/29980/26271/5591/51514/60561/835/55755/672/55055/9735/144455/4085/1111/81620/11130/9319/51512/2177/641/1063/699/891/9212/7272/2146
BP	GO:0009612	response to mechanical stimulus	187	0.398966	2.00647	2.82651e-08	4.73078e-07	2.76993e-07	3635	tags=31%, list=14%, signal=27%	5138/6387/2022/654/5743/5734/2534/54407/7132/7048/4615/7099/7057/3815/3553/2354/10628/834/7098/2353/54532/9378/55584/2934/51311/10370/1906/355/5764/7852/8061/4313/7832/5311/8795/59341/4353/6416/3485/477/1535/3725/7481/3741/23621/9379/3659/358/6548/4214/4790/2185/9531/4131/7124/1265/1647/664
BP	GO:0010634	positive regulation of epithelial cell migration	136	0.444155	2.15355	2.9341e-08	4.90038e-07	2.86923e-07	3691	tags=35%, list=15%, signal=30%	7010/84913/5743/3162/147372/388/2113/7048/5641/4780/659/4846/7057/5293/5294/301/3091/57111/54453/1906/23411/2625/57142/54566/5336/6237/57381/7424/23328/306/64094/3725/207/10982/1793/6678/8829/9734/3640/27286/2185/2255/3037/3690/284/5606/10013
BP	GO:0071466	cellular response to xenobiotic stimulus	162	0.423608	2.08227	3.04682e-08	5.07782e-07	2.97313e-07	3761	tags=36%, list=15%, signal=31%	1393/2327/5621/1571/113612/969/10/1544/6283/2947/4780/5142/316/4609/54658/3553/54657/1576/7098/2950/1559/284996/2621/8529/1592/10249/7054/27284/1555/1906/2180/7852/4824/6095/2946/1549/9/1558/54659/1565/30/1543/5447/9446/1548/6554/4659/66002/7172/4208/5925/9447/2944/6799/2203/2329/1551/1429
BP	GO:0048002	antigen processing and presentation of peptide antigen	57	0.590664	2.44724	3.14843e-08	5.23601e-07	3.06575e-07	4793	tags=51%, list=19%, signal=41%	10332/30835/5641/1520/2207/567/3133/3125/972/3106/3115/3136/3113/50856/2213/3122/3134/3111/3117/3109/3126/7189/6556/3119/563/3551/3108/3112/8722
BP	GO:0052547	regulation of peptidase activity	397	0.324153	1.78075	3.17691e-08	5.2722e-07	3.08694e-07	4351	tags=31%, list=17%, signal=26%	1893/8530/5621/5743/2152/1378/7980/8434/2534/9314/2/3082/4804/6279/710/5641/83595/7057/1654/4609/114548/4803/51232/5118/831/5627/3428/834/57333/4035/7078/1471/27141/6774/64581/960/4255/199713/5023/256394/2621/2934/10550/356/939/58189/653145/55081/9806/3717/1285/355/4824/8837/6653/23411/6622/3476/65018/1508/6280/3164/2149/7079/56925/684/84168/58484/135/10653/6691/9451/3700/5176/7805/25816/4067/231…
BP	GO:0042092	type 2 immune response	35	0.684512	2.55513	3.27512e-08	5.41644e-07	3.17139e-07	2545	tags=49%, list=10%, signal=44%	1893/975/3142/942/114548/301/729230/2625/972/91543/384/10538/3569/3566/3565/6778/604
CC	GO:0035097	histone methyltransferase complex	50	-0.627949	-2.33389	3.27766e-08	5.41644e-07	3.17139e-07	3921	tags=50%, list=16%, signal=42%	6878/10856/11108/30827/54881/54554/84661/57680/9739/26121/10419/81887/4221/11091/23468/6874/5929/1876/3054/8607/23054/10445/23512/22976/2146
BP	GO:1903530	regulation of secretion by cell	496	0.295346	1.66081	3.28949e-08	5.42454e-07	3.17613e-07	5061	tags=31%, list=20%, signal=25%	6387/1393/11314/6422/114897/654/140/3162/185/945/2294/7133/7132/84106/6352/148/4889/5880/27345/8074/7099/51762/51092/415116/3553/143425/7043/6844/1080/301/3091/9971/3822/729230/5023/116/7097/26281/83849/8832/1906/3717/201294/4824/2268/6622/952/65018/4628/107/120892/2149/6688/6386/8564/640/91543/5066/5530/9501/240/83452/3598/135/5443/4129/9367/84976/8600/7424/25924/2213/3134/3689/5020/4067/55503/3…
BP	GO:0045576	mast cell activation	60	0.579707	2.43084	3.38348e-08	5.56781e-07	3.26002e-07	2454	tags=40%, list=10%, signal=36%	11314/3162/2294/695/6283/5880/10666/3815/10125/5293/3937/5294/8832/201294/5729/2268/5730/640/3598/8773/5359/4067/3566/3565
BP	GO:0007094	mitotic spindle assembly checkpoint signaling	36	-0.684561	-2.35523	3.45251e-08	5.64583e-07	3.3057e-07	2695	tags=56%, list=11%, signal=50%	84861/348654/10459/701/7756/9183/7517/10403/55755/55055/9735/4085/81620/11130/9319/1063/699/891/9212/7272
BP	GO:0071173	spindle assembly checkpoint signaling	36	-0.684561	-2.35523	3.45251e-08	5.64583e-07	3.3057e-07	2695	tags=56%, list=11%, signal=50%	84861/348654/10459/701/7756/9183/7517/10403/55755/55055/9735/4085/81620/11130/9319/1063/699/891/9212/7272
BP	GO:0071174	mitotic spindle checkpoint signaling	36	-0.684561	-2.35523	3.45251e-08	5.64583e-07	3.3057e-07	2695	tags=56%, list=11%, signal=50%	84861/348654/10459/701/7756/9183/7517/10403/55755/55055/9735/4085/81620/11130/9319/1063/699/891/9212/7272
BP	GO:0048659	smooth muscle cell proliferation	129	0.450931	2.15369	3.48623e-08	5.68909e-07	3.33103e-07	4915	tags=46%, list=20%, signal=37%	3486/5743/3162/57447/9510/7048/6352/4889/4615/199/659/4846/7099/7057/4609/7043/3398/30008/5739/80310/2081/1906/3717/1027/4313/3600/5728/5031/1535/2773/3725/3488/10672/3569/207/4969/2697/4208/347/4883/59272/3479/7124/3593/5724/2771/7520/6934/10891/2006/4331/3248/657/2247/283/3596/93649/55512/3480
BP	GO:2000514	regulation of CD4-positive, alpha-beta T cell activation	60	0.57828	2.42486	3.6481e-08	5.94087e-07	3.47845e-07	5135	tags=55%, list=20%, signal=44%	4092/11126/1604/975/7048/3142/942/864/114548/6363/301/3125/3594/3662/2625/384/3122/57045/5588/3566/3565/84695/604/10892/941/3593/57630/84807/177/3071/3965/54440/29126
BP	GO:0051985	negative regulation of chromosome segregation	42	-0.670885	-2.38018	3.74476e-08	6.07303e-07	3.55583e-07	2695	tags=55%, list=11%, signal=49%	84861/348654/10459/701/7756/9183/5885/7517/10403/26271/55755/55055/9735/4085/81620/11130/9319/1063/699/891/9212/9232/7272
BP	GO:1905819	negative regulation of chromosome separation	42	-0.670885	-2.38018	3.74476e-08	6.07303e-07	3.55583e-07	2695	tags=55%, list=11%, signal=49%	84861/348654/10459/701/7756/9183/5885/7517/10403/26271/55755/55055/9735/4085/81620/11130/9319/1063/699/891/9212/9232/7272
BP	GO:0055076	transition metal ion homeostasis	126	0.445151	2.1207	3.78243e-08	6.12145e-07	3.58418e-07	3256	tags=37%, list=13%, signal=32%	2658/79689/654/1318/4502/5621/3162/4489/4493/4501/2395/4499/79901/4494/6279/30061/57817/212/4609/4495/567/81894/2034/3091/56898/9843/4496/6280/55240/51310/8031/51076/147138/8692/3932/2495/9550/23479/1356/283375/6341/64116/91252/6556/3263/10463
BP	GO:1903707	negative regulation of hemopoiesis	97	0.488634	2.24309	3.88291e-08	6.26862e-07	3.67036e-07	2662	tags=36%, list=11%, signal=32%	6422/4092/1378/714/3142/10875/864/7099/4609/9935/7098/301/3398/10272/2737/3635/972/8993/11025/7107/10234/1021/325/2213/4067/5295/3566/3565/84695/604/3659/6348/55294/3902/11006
BP	GO:0035296	regulation of tube diameter	131	0.446055	2.14353	3.89738e-08	6.26862e-07	3.67036e-07	6158	tags=46%, list=24%, signal=35%	147/1621/6915/133/6916/5743/1910/185/148/3357/10365/27345/659/4846/10800/5023/1906/342527/2643/3778/9474/952/4313/5997/2149/6649/135/796/477/3363/3741/2296/9732/153/154/4883/59272/7124/151/10911/2244/3352/2729/1373/857/552/1908/5345/150/6546/1909/6338/340481/2243/3274/553/155/152/624/186
BP	GO:0097746	blood vessel diameter maintenance	131	0.446055	2.14353	3.89738e-08	6.26862e-07	3.67036e-07	6158	tags=46%, list=24%, signal=35%	147/1621/6915/133/6916/5743/1910/185/148/3357/10365/27345/659/4846/10800/5023/1906/342527/2643/3778/9474/952/4313/5997/2149/6649/135/796/477/3363/3741/2296/9732/153/154/4883/59272/7124/151/10911/2244/3352/2729/1373/857/552/1908/5345/150/6546/1909/6338/340481/2243/3274/553/155/152/624/186
BP	GO:0072676	lymphocyte migration	105	0.475122	2.21538	4.0219e-08	6.45564e-07	3.77985e-07	4846	tags=43%, list=19%, signal=35%	1893/6387/6368/6359/9023/81704/1398/6352/199/1667/6347/6369/6366/6363/58494/5293/5294/6793/729230/2621/388372/2625/7535/414062/58191/11035/207/6349/6348/64005/6288/347/3676/2185/6362/6357/1236/351/6558/6360/387695/131450/56253/326/3695
BP	GO:0002292	T cell differentiation involved in immune response	71	0.545981	2.35282	4.05029e-08	6.48793e-07	3.79876e-07	3421	tags=44%, list=14%, signal=38%	4092/8809/5734/8320/3142/942/114836/10875/114548/6363/2207/6774/301/4063/3594/5105/6095/3662/2625/3122/10538/3569/64218/3566/3565/84695/6778/604/10892/941/3593
BP	GO:0006913	nucleocytoplasmic transport	268	-0.389106	-1.841	4.14248e-08	6.60857e-07	3.8694e-07	3501	tags=32%, list=14%, signal=28%	23212/51307/129138/8841/22916/3728/2010/29072/63928/51366/8536/79711/8312/183/4321/23636/127933/55198/51715/84321/6830/5501/152877/55027/51496/55696/7295/51194/9984/6788/23214/79228/7341/7248/10073/9972/10762/55746/2733/6608/65109/56943/10155/51547/29890/23511/3840/2932/11052/8563/1871/26019/5905/7514/26263/51319/23534/3692/65083/4000/8480/55705/3326/57122/4686/9883/9887/1386/1660/55341/9670/580/…
BP	GO:0051169	nuclear transport	268	-0.389106	-1.841	4.14248e-08	6.60857e-07	3.8694e-07	3501	tags=32%, list=14%, signal=28%	23212/51307/129138/8841/22916/3728/2010/29072/63928/51366/8536/79711/8312/183/4321/23636/127933/55198/51715/84321/6830/5501/152877/55027/51496/55696/7295/51194/9984/6788/23214/79228/7341/7248/10073/9972/10762/55746/2733/6608/65109/56943/10155/51547/29890/23511/3840/2932/11052/8563/1871/26019/5905/7514/26263/51319/23534/3692/65083/4000/8480/55705/3326/57122/4686/9883/9887/1386/1660/55341/9670/580/…
BP	GO:0031023	microtubule organizing center organization	115	-0.482533	-2.05772	4.16796e-08	6.63569e-07	3.88528e-07	3830	tags=38%, list=15%, signal=33%	55125/5902/51199/1069/79959/2801/54875/6566/23636/348654/124093/56890/4957/23291/11190/55226/10432/10806/1017/22995/55835/585/1639/55722/163786/7514/117178/9371/7840/7517/10403/55755/672/284403/4591/9793/10733/1111/899/3832/4751/6790/29901/6491
BP	GO:0043065	positive regulation of apoptotic process	451	0.303914	1.70523	4.2814e-08	6.80247e-07	3.98293e-07	2628	tags=24%, list=10%, signal=22%	8406/6422/10439/3486/133/11126/5621/5743/3162/5740/3399/2308/388/5915/10687/7133/665/4616/7132/4804/6279/3001/6352/8742/6347/7057/220/1654/4609/81030/10628/5293/7043/7078/7305/7098/301/2627/4170/60485/26524/8575/2934/10550/9353/356/4118/9770/22822/3717/355/4824/5609/22925/3778/23411/8061/3635/6154/6622/7704/4313/8462/6280/7164/3164/1848/8795/6196/467/10912/640/5728/6194/472/6416/1191/58484/135/50…
BP	GO:0030278	regulation of ossification	106	0.472388	2.19208	4.47585e-08	7.09704e-07	4.1554e-07	3350	tags=33%, list=13%, signal=29%	1893/6422/4091/1230/654/4092/5552/5734/2824/22856/659/8074/7043/92/3091/5764/596/7704/240/796/4958/9249/5020/27152/860/1959/5087/2697/6348/2201/154/4208/2185/54361/4256
BP	GO:0045619	regulation of lymphocyte differentiation	169	0.414359	2.05745	4.49823e-08	7.11811e-07	4.16774e-07	3504	tags=34%, list=14%, signal=30%	6422/558/10288/4092/1378/695/7048/3142/942/677/10875/864/639/114548/6363/10125/3575/678/301/3398/729230/2621/939/3594/2736/5105/3662/2737/2625/3635/972/7704/7535/8993/3600/914/3122/3111/3707/115352/3566/3565/5788/84695/604/3659/3902/11006/10892/6850/941/22806/3559/54106/2064/3593/3574/3456
BP	GO:0044703	multi-organism reproductive process	191	0.389157	1.97716	4.5521e-08	7.18883e-07	4.20915e-07	3639	tags=31%, list=14%, signal=27%	1393/133/5743/8434/54407/23764/7056/7048/5069/2099/3726/659/639/3553/2354/7043/92/3490/2353/5368/5023/116/2057/23641/59350/10370/51673/1906/5764/596/8061/952/4313/5997/1508/5066/796/3485/113/2056/3488/5020/84868/397/1543/207/2697/1394/5858/7216/10935/150921/54361/59272/151/79816/5724/85360/5671
BP	GO:0044786	cell cycle DNA replication	36	-0.681	-2.34298	4.80404e-08	7.57144e-07	4.43317e-07	4136	tags=67%, list=16%, signal=56%	7486/51750/80174/1763/5111/59343/51053/54962/10269/79733/3978/8317/5422/29980/64785/26271/4175/144455/81620/4172/2237/4173/641/4171
BP	GO:0000086	G2/M transition of mitotic cell cycle	116	-0.495417	-2.11638	4.8387e-08	7.61075e-07	4.45618e-07	4492	tags=44%, list=18%, signal=36%	7465/808/51720/283807/27133/8091/51343/23236/571/80174/11200/25942/56658/6873/26233/55920/65123/51400/1017/84936/80279/11073/5889/9088/1019/84930/8317/5885/57504/57551/993/990/29980/995/26271/51514/6502/60561/672/6240/1111/994/641/9928/2305/1063/6790/891/9212/890/9833
BP	GO:0097305	response to alcohol	224	0.375927	1.94791	5.14155e-08	8.07089e-07	4.7256e-07	2893	tags=27%, list=11%, signal=24%	1393/6422/1621/6915/5732/6916/1571/5734/2534/2/54331/7048/6279/7049/10365/57817/929/4609/54658/9962/6366/1536/6363/2354/3490/2353/1080/2059/4255/9353/939/5999/7054/5729/847/8061/2625/5997/107/595/687/130/54762/4129/7122/5031/1582/113/1535/11184/1036/761/5020/7412/207/6554/109/6348/18/2230/6586
BP	GO:0010876	lipid localization	379	0.320838	1.76354	5.26878e-08	8.25408e-07	4.83286e-07	5526	tags=36%, list=22%, signal=28%	114897/654/5322/9227/185/1071/5306/79895/5947/28234/5360/51703/319/10350/3931/7057/57088/4481/3553/10351/148229/4035/5375/114876/1080/114879/301/2167/8529/356/80765/11309/948/1906/366/57048/2180/4824/23130/22925/23411/7436/23460/2170/58488/1191/54762/10998/5443/5359/376497/10599/8600/1582/5020/201305/10349/3569/55754/84266/207/346/114786/9525/6554/3990/3949/8273/55294/1394/1376/4018/347/337/6850/…
BP	GO:0009615	response to virus	345	0.322481	1.7571	5.2861e-08	8.26467e-07	4.83906e-07	3663	tags=30%, list=15%, signal=26%	6387/8547/10346/11213/3764/8519/665/5551/84282/6039/7178/6352/1668/10875/4615/91607/10379/1667/10964/26191/55509/1654/3459/114548/3553/10561/6363/4939/81030/3428/51191/10060/7098/3091/8575/7097/51311/3437/3594/201294/7852/26057/6041/596/79132/55601/9474/8061/2625/2268/64135/104/54941/3600/91543/11040/24138/684/10077/1191/3665/197259/5359/5450/4600/1021/4599/3669/11035/4938/6397/29800/3434/3433/54…
BP	GO:0050921	positive regulation of chemotaxis	130	0.444232	2.13097	5.40988e-08	8.44136e-07	4.94252e-07	3152	tags=31%, list=13%, signal=27%	6387/4908/1230/64805/2358/1436/2152/63940/6352/5641/5880/199/659/728/7057/6366/6363/719/729230/2621/80310/9353/3603/1240/1906/5764/7852/972/6688/59341/6504/7424/64094/3569/3565/8829/6348/245937/2185/2255
BP	GO:0034765	regulation of ion transmembrane transport	413	0.309136	1.69851	5.58302e-08	8.69419e-07	5.09055e-07	4102	tags=27%, list=16%, signal=23%	1393/53826/1318/51185/5621/1193/89822/288/3764/2534/2273/10268/5142/57817/54102/6347/1520/6324/387129/1536/5144/2040/5649/2669/7881/6844/1080/5294/9424/729230/3270/5023/126306/10550/5999/3306/3773/1906/3778/25932/9474/6622/2946/28954/5997/11151/65018/5311/2149/9104/5336/93589/54800/2745/3772/477/5031/3753/1535/2056/84329/3790/259232/57165/131096/5348/4067/30820/287/148811/23479/9446/30845/6330/22…
BP	GO:0070664	negative regulation of leukocyte proliferation	82	0.520439	2.3012	5.70523e-08	8.84932e-07	5.18138e-07	3412	tags=39%, list=14%, signal=34%	339390/11326/11314/90865/10288/5621/1378/6441/695/7940/942/2615/7305/2950/79679/23495/80380/3635/640/472/384/2213/57045/4067/84868/8379/11006/1051/941/27242/3559/2064
BP	GO:0061041	regulation of wound healing	115	0.459456	2.16777	5.70098e-08	8.84932e-07	5.18138e-07	4521	tags=42%, list=18%, signal=34%	5156/114897/6915/22915/2152/1398/7056/710/4780/90102/4846/7057/10855/5627/4638/64581/301/10979/58189/948/2160/1906/7852/2149/5728/240/5327/325/64094/18/3640/5340/3818/58529/10019/2048/54361/2811/1361/7124/55966/2244/928/857/6558/23189/6484/2247
BP	GO:1901605	alpha-amino acid metabolic process	174	0.400613	1.9942	5.81695e-08	9.00478e-07	5.27241e-07	4761	tags=48%, list=19%, signal=39%	143941/2639/4846/51166/443/51380/3242/9056/4942/9971/4329/10249/7054/4482/54511/6999/10157/4522/1491/2954/8564/8604/27165/445/6898/64577/420/92292/384/60496/3155/3712/4143/1036/549/6470/468/5860/27232/2746/4524/137872/64116/2875/144193/2752/389434/635/84706/51268/10955/10841/875/64902/4204/2805/2653/8942/9945/4548/10993/131669/11112/58510/38/23743/26275/2729/1373/5053/7915/8659/3034/2184/1743/509…
BP	GO:0002495	antigen processing and presentation of peptide antigen via MHC class II	29	0.71861	2.5399	6.04239e-08	9.313e-07	5.45287e-07	4793	tags=66%, list=19%, signal=53%	5641/1520/2207/567/3125/972/3115/3113/2213/3122/3111/3117/3109/3126/7189/3119/3108/3112/8722
BP	GO:0016571	histone methylation	117	-0.482212	-2.06642	6.05172e-08	9.313e-07	5.45287e-07	3334	tags=48%, list=13%, signal=42%	64324/150572/1499/80349/10322/54880/56341/54093/79813/2091/55677/55011/4801/10664/55870/29072/11108/29104/2641/56254/6830/1387/30827/4602/54554/4802/10919/51742/84661/9739/26147/63925/59336/10419/64754/23168/51547/4221/11091/65094/5929/6598/4000/3054/11137/1789/1786/10445/9869/23512/672/6839/4800/90780/22976/2146
BP	GO:0071241	cellular response to inorganic substance	202	0.38841	1.97136	6.02829e-08	9.313e-07	5.45287e-07	3818	tags=34%, list=15%, signal=29%	1393/654/4502/5621/5743/3162/288/2308/4489/4493/4501/4499/4494/1398/1544/8826/30061/5641/4780/3726/1536/4495/143425/2354/653361/567/10235/2353/2167/7054/83849/1906/8837/25932/1027/6622/4496/107/5311/120892/284111/5336/84557/241/113/9451/3707/84329/5176/3725/1543/468/57586/207/23621/358/4208/144402/57192/1742/6609/1740/2203/664/4548/706/79085/6569/3777
BP	GO:0014066	regulation of phosphatidylinositol 3-kinase signaling	98	0.47897	2.20451	6.24498e-08	9.59155e-07	5.61597e-07	3413	tags=39%, list=14%, signal=34%	7010/5156/1634/6403/3059/5783/3082/6352/26051/3815/10125/5649/653361/56034/10870/80310/3717/4824/847/23411/2268/55615/2149/4920/2322/5728/113791/10507/49860/118788/25827/5343/4915/3643/3479/8395/7124/284
BP	GO:0031295	T cell costimulation	44	0.637751	2.50333	6.46113e-08	9.90412e-07	5.79898e-07	4716	tags=59%, list=19%, signal=48%	1949/10288/11126/2534/975/942/6366/6363/10673/80380/1326/7409/916/959/4067/3932/207/11006/941/921/1947/1236/84433/857/7525/940
BP	GO:0002221	pattern recognition receptor signaling pathway	153	0.420646	2.0716	6.54568e-08	1.00141e-06	5.86339e-07	3377	tags=34%, list=13%, signal=30%	11314/11027/11213/695/84282/2219/4615/2099/1520/7099/26191/1654/929/7098/7096/64581/9971/7097/51311/948/4153/26057/79132/55601/3662/57142/64135/54941/9867/91543/5336/64922/3665/23643/1535/4938/6397/4067/23151/84868/51296/115352/118788/1540/3659/9958/23547/7189/2672/10333/54106/7124
MF	GO:0001540	amyloid-beta binding	80	0.511868	2.24904	6.70203e-08	1.02333e-06	5.99174e-07	5543	tags=55%, list=22%, signal=43%	8685/10288/2358/5621/712/4804/10268/7099/4481/4035/1471/7097/948/6653/972/1191/2213/5204/3689/590/23621/3949/154/3643/2048/10333/335/321/3684/8301/1410/1139/143458/4043/177/84570/774/81618/2892/43/9445/323/9452/83941
MF	GO:0043021	ribonucleoprotein complex binding	123	-0.48341	-2.08942	6.79184e-08	1.03302e-06	6.04845e-07	5153	tags=49%, list=20%, signal=39%	92399/90850/60558/23107/5499/283820/6726/10084/10421/56648/2332/3309/23481/24148/27067/6176/6629/4193/9775/408050/127933/8225/6728/91875/7374/55124/60678/23246/10430/26121/54505/10465/25929/10419/6730/55759/23420/11052/23367/84295/55176/23468/10196/6626/3692/23480/26284/4528/6628/54915/1660/27044/54499/6637/57510/4830/9793/4931/29927/2146
BP	GO:0010639	negative regulation of organelle organization	299	-0.381325	-1.8274	6.78309e-08	1.03302e-06	6.04845e-07	3193	tags=28%, list=13%, signal=25%	54434/10193/5716/10075/23671/1761/57143/85415/84861/4134/7016/348654/55486/10297/10300/10459/56890/10919/7037/5062/6709/55226/10432/51332/115704/2288/701/829/4976/3985/585/58526/4133/375189/292/26471/9031/7515/7756/9183/54552/5885/7429/28978/4000/6904/57551/27166/830/9700/7517/10403/84260/10198/27085/26271/347240/26586/8195/55755/672/55055/4591/80119/142/9735/3925/4085/1111/81620/51256/11130/9319…
BP	GO:0010498	proteasomal protein catabolic process	425	-0.34931	-1.73492	6.89468e-08	1.04663e-06	6.12813e-07	5133	tags=34%, list=20%, signal=27%	25897/90850/8975/7184/6613/10869/7319/6469/9097/55968/1649/5700/2272/1047/23510/8263/84164/90637/283807/5714/2768/821/10616/26272/23609/5704/25820/5706/54476/5682/10213/1642/51343/2332/127544/8405/3309/64795/378884/337867/10425/10116/10193/5689/5716/10075/56658/54442/4193/55741/8312/3304/10755/25852/84861/5094/55298/122809/117584/79089/131405/5690/26268/84727/8450/57761/23640/81858/9810/55139/262…
BP	GO:0098869	cellular oxidant detoxification	85	0.518773	2.32369	7.0024e-08	1.06092e-06	6.21184e-07	3274	tags=38%, list=13%, signal=33%	10516/5743/1193/3040/3043/114757/7837/27244/4780/4846/4056/2950/2878/64359/948/2643/847/2946/6280/2954/6649/3047/4353/3048/2745/241/3240/9446/337/5742/10935/2880
BP	GO:0003206	cardiac chamber morphogenesis	119	0.452393	2.13114	7.25938e-08	1.09774e-06	6.42737e-07	2939	tags=32%, list=12%, signal=28%	4091/7010/2022/4092/9464/653/2294/4634/23414/9510/7048/4889/7049/659/4846/2274/4061/3091/2627/60485/8321/9353/10370/2625/7472/3084/5457/55742/9249/7481/6899/6909/2296/8829/4208/26508/6586/57057
BP	GO:0007188	adenylate cyclase-modulating G protein-coupled receptor signaling pathway	203	0.38347	1.96004	7.40033e-08	1.11689e-06	6.53954e-07	4357	tags=30%, list=17%, signal=25%	5138/8685/7433/147/9630/6915/64805/5732/2357/133/2358/8477/2869/5734/2775/54331/10268/1902/148/5142/5144/5739/116/59350/5996/1906/5997/107/2642/9495/135/796/113/2773/10672/109/1394/153/154/11214/3640/2769/4883/5660/6344/151/5567/346562/5731/8484/57561/11245/2771/170589/10266/3352/4543/1232/9590/7253
BP	GO:0051168	nuclear export	128	-0.476433	-2.06881	7.46702e-08	1.12479e-06	6.58579e-07	5081	tags=45%, list=20%, signal=36%	8106/26993/3313/23279/9688/54830/55677/80145/6672/23212/22916/2010/29072/8536/23636/127933/84321/6830/51496/55696/7295/9984/23214/79228/7248/9972/55746/2733/56943/51547/29890/23511/2932/11052/8563/26019/5905/7514/3692/65083/8480/57122/4686/9883/9887/1660/55341/580/79902/23381/2810/11260/5433/57510/1434/9631/1020
BP	GO:2000779	regulation of double-strand break repair	80	-0.547302	-2.22613	7.49923e-08	1.12747e-06	6.6015e-07	4300	tags=48%, list=17%, signal=40%	56154/25913/8091/64110/51750/55929/10856/7913/29072/51366/60/54799/7158/84501/10459/4968/10902/3297/51547/86/9400/23126/2187/5932/1663/8607/63979/56893/8295/5591/24144/6944/142/1111/10635/2305/8914/10721
BP	GO:0002478	antigen processing and presentation of exogenous peptide antigen	34	0.690086	2.55925	7.70474e-08	1.15615e-06	6.76942e-07	4793	tags=68%, list=19%, signal=55%	5641/1520/2207/567/3133/3125/972/3115/3113/50856/2213/3122/3134/3111/3117/3109/3126/7189/3119/3551/3108/3112/8722
BP	GO:1903522	regulation of blood circulation	234	0.366977	1.91596	8.03749e-08	1.20378e-06	7.04827e-07	3466	tags=28%, list=14%, signal=24%	147/1621/6915/4092/133/140/6916/5743/1910/185/1193/4634/148/5142/27345/659/4846/6324/10800/5144/10060/5294/2034/3270/5023/5999/7054/1906/3717/342527/2643/2946/952/4313/5997/2149/796/477/3753/125111/5020/5348/489/6909/3741/287/2697/9446/30845/6330/9732/2258/6548/29119/3781/482/153/27129/59272/6720/51086/7124/151/781/23171
BP	GO:0002828	regulation of type 2 immune response	30	0.712963	2.57453	8.17788e-08	1.22247e-06	7.1577e-07	2545	tags=53%, list=10%, signal=48%	1893/975/3142/942/114548/301/729230/2625/972/91543/384/3569/3566/3565/6778/604
BP	GO:0031294	lymphocyte costimulation	46	0.612827	2.43696	8.2053e-08	1.22423e-06	7.16802e-07	4716	tags=59%, list=19%, signal=48%	1949/10288/11126/2534/975/942/6366/6363/10673/80380/1326/7409/916/959/4067/3932/207/3565/11006/941/921/1947/1236/84433/857/7525/940
BP	GO:0019229	regulation of vasoconstriction	60	0.570587	2.3926	8.32298e-08	1.23943e-06	7.257e-07	6082	tags=55%, list=24%, signal=42%	147/1621/6915/133/6916/5743/185/148/27345/659/10800/5023/1906/342527/952/4313/2149/477/3741/9732/59272/151/2244/857/552/1908/150/340481/2243/3274/553/152/624
CC	GO:0120114	Sm-like protein family complex	68	-0.560949	-2.22221	8.38861e-08	1.24683e-06	7.30034e-07	5867	tags=59%, list=23%, signal=45%	6632/51691/83443/84844/27257/125050/51690/10421/25766/23658/134353/10907/24148/6634/6629/6627/153527/8175/56257/27336/6636/26121/10465/9128/25929/10946/10992/9129/6633/6626/79833/9416/9343/6628/57819/6635/6637/10713/6631/25804
BP	GO:1901989	positive regulation of cell cycle phase transition	100	-0.504445	-2.11554	8.4971e-08	1.26056e-06	7.38075e-07	3901	tags=47%, list=16%, signal=40%	252983/134353/7015/23236/80174/11200/6868/25942/225689/4193/7027/56257/8450/9984/55920/1981/55835/8563/328/5889/1019/163786/51433/8317/51434/57504/286053/993/51692/9700/990/27085/995/26271/51514/8697/6241/51529/6240/81620/81610/994/891/6491/2146/11065/113130
BP	GO:0019886	antigen processing and presentation of exogenous peptide antigen via MHC class II	27	0.745806	2.60121	8.70474e-08	1.2865e-06	7.53258e-07	4793	tags=70%, list=19%, signal=57%	5641/1520/2207/567/3125/972/3115/3113/2213/3122/3111/3117/3109/3126/7189/3119/3108/3112/8722
CC	GO:0071011	precatalytic spliceosome	47	-0.630003	-2.31213	8.69359e-08	1.2865e-06	7.53258e-07	5867	tags=68%, list=23%, signal=52%	6632/51691/83443/84844/51690/4236/23658/84811/10907/24148/55234/6634/6629/6627/153527/8175/6636/26121/84950/9128/10946/10992/9129/6633/9343/6628/10262/57819/6635/8449/6637/25804
BP	GO:0009620	response to fungus	59	0.566158	2.381	8.92987e-08	1.31728e-06	7.71285e-07	5361	tags=56%, list=21%, signal=44%	5322/1511/695/1398/6279/6283/1668/4615/57817/1667/7099/81030/64581/9474/6280/6688/5336/4353/50856/23406/1669/10892/9958/6850/245928/23765/64170/387695/170482/383/4057/117159/10578
BP	GO:0042113	B cell activation	240	0.363573	1.90252	9.04646e-08	1.33197e-06	7.79886e-07	3504	tags=31%, list=14%, signal=27%	11314/6422/1378/64092/695/3543/975/942/677/7099/3815/10125/112616/5293/3575/7305/678/28514/3398/374403/23495/10673/939/54900/3394/4066/596/3635/972/3476/7535/952/6688/2322/640/5336/55619/472/684/139818/5450/959/4242/2213/973/10538/7805/4067/3445/7412/1316/3569/10451/115352/3565/6482/5788/6778/604/4064/9734/4208/10892/3676/6850/2048/974/2185/22806/27242/54106/3574/7528/3456
CC	GO:0030532	small nuclear ribonucleoprotein complex	58	-0.583665	-2.2304	9.13153e-08	1.34198e-06	7.85743e-07	5867	tags=64%, list=23%, signal=49%	6632/51691/83443/84844/125050/51690/10421/25766/23658/134353/10907/24148/6634/6629/6627/153527/8175/56257/27336/6636/26121/10465/9128/10946/10992/9129/6633/6626/9416/9343/6628/57819/6635/6637/10713/6631/25804
BP	GO:0046635	positive regulation of alpha-beta T cell activation	66	0.549591	2.32646	9.45935e-08	1.38755e-06	8.12426e-07	3421	tags=47%, list=14%, signal=41%	10148/11126/1604/975/7048/3142/942/864/26191/114548/6363/301/3133/729230/3125/3594/3717/2737/7704/7535/916/3122/3707/5588/3566/5788/11006/10892/6850/941/3593
BP	GO:0045834	positive regulation of lipid metabolic process	135	0.426417	2.06264	9.54089e-08	1.39689e-06	8.17898e-07	4014	tags=35%, list=16%, signal=29%	7010/5156/654/64805/83643/133/2358/5743/185/975/10580/3357/3815/3553/6366/6363/23417/301/9971/1389/2268/972/2322/9104/2170/345275/376497/4067/10451/207/57406/5447/3949/337/2185/54361/6720/7376/335/7124/23410/27329/1081/57104/1385/10891/1236
BP	GO:0045667	regulation of osteoblast differentiation	111	0.462442	2.18048	9.70695e-08	1.41856e-06	8.30581e-07	5264	tags=46%, list=21%, signal=36%	6422/4091/654/9464/3399/1052/8519/3082/659/8074/51232/92/10979/3572/9770/8646/2737/6096/10413/202151/8313/3199/63923/1021/7424/255743/57045/3488/10507/3569/468/860/2201/4208/6591/1051/54361/3479/7124/117581/4921/3611/657/9241/2247/3727/4057/55363/4041/4880/6497
BP	GO:0032729	positive regulation of interferon-gamma production	74	0.539692	2.33388	9.88323e-08	1.44163e-06	8.4409e-07	3421	tags=45%, list=14%, signal=39%	10148/11126/8809/3554/114836/5142/7099/26191/929/10666/3553/10125/5144/7098/64581/7294/729230/3394/51311/3594/3717/6504/3115/914/916/3113/84868/51744/11118/6556/54106/7124/3593
BP	GO:0009991	response to extracellular stimulus	432	0.301969	1.67934	9.90316e-08	1.44185e-06	8.4422e-07	4101	tags=29%, list=16%, signal=25%	6422/558/6915/2350/23710/133/9227/5743/3162/2308/54407/2/5166/7048/7538/81631/249/27244/4780/11170/199/22856/57817/659/8074/54658/583/1536/3428/663/2353/27141/9971/4255/2621/1592/7054/2690/2180/355/5105/968/596/9474/6653/847/23411/8061/11337/594/1312/3600/595/4982/120892/467/29103/59341/6506/4353/445/2642/10325/5443/84557/3485/1582/1535/2056/22933/9451/7481/9706/590/5020/4067/7412/1543/11345/468/…
BP	GO:0001659	temperature homeostasis	170	0.399426	1.98439	1.01473e-07	1.47466e-06	8.63429e-07	3966	tags=36%, list=16%, signal=30%	1621/51316/8809/5743/1910/2308/3397/249/7099/10400/3553/6774/2034/56034/729230/116/2167/1240/948/3717/2180/7852/3662/2104/37/3600/10912/25979/58488/5334/50486/376497/8600/3953/79054/5020/468/57406/1958/2697/33/3033/3566/3565/6778/216/1376/153/154/18/5925/6850/1051/4883/7376/7124/57561/1666/79068/79602/10891
BP	GO:0050818	regulation of coagulation	65	0.549675	2.32683	1.02083e-07	1.48077e-06	8.67007e-07	4504	tags=45%, list=18%, signal=37%	5156/114897/6915/2152/7056/710/4780/4846/7057/10855/5627/948/2160/1906/2149/5327/10544/18/5340/3818/10019/2048/2811/1361/5663/2244/928/857/6484
BP	GO:0060193	positive regulation of lipase activity	62	0.565264	2.36928	1.02393e-07	1.48252e-06	8.68035e-07	5478	tags=58%, list=22%, signal=46%	5156/64805/5322/185/942/1902/6352/148/3357/2099/728/3702/3815/7294/5330/6401/10316/5031/10672/2769/337/7376/335/5724/338328/11331/2247/283/116519/2260/552/10062/350/1909/5159/5741
BP	GO:0002821	positive regulation of adaptive immune response	104	0.476875	2.21109	1.03262e-07	1.49235e-06	8.73788e-07	3997	tags=42%, list=16%, signal=36%	920/8809/912/1604/3554/695/8631/975/10666/114548/3553/567/64581/3133/729230/3572/3125/10673/3594/23411/2625/91543/3106/6504/3136/3122/3134/5588/3569/3565/5788/6778/10892/8417/7189/6556/3263/7124/3593/563/911/64170/79915/84807
CC	GO:0071005	U2-type precatalytic spliceosome	46	-0.630726	-2.29018	1.09759e-07	1.58137e-06	9.25913e-07	5867	tags=70%, list=23%, signal=53%	6632/51691/83443/84844/51690/4236/23658/84811/10907/24148/55234/6634/6629/6627/153527/8175/6636/26121/84950/9128/10946/10992/9129/6633/9343/6628/10262/57819/6635/8449/6637/25804
BP	GO:0032945	negative regulation of mononuclear cell proliferation	76	0.514187	2.23953	1.09826e-07	1.58137e-06	9.25913e-07	3412	tags=39%, list=14%, signal=34%	339390/11326/11314/10288/5621/1378/6441/695/7940/942/2615/7305/79679/23495/80380/3635/640/472/384/2213/57045/4067/84868/8379/11006/1051/941/27242/3559/2064
BP	GO:0050672	negative regulation of lymphocyte proliferation	75	0.515321	2.23339	1.11107e-07	1.59688e-06	9.34993e-07	3412	tags=40%, list=14%, signal=35%	339390/11326/11314/10288/5621/1378/6441/695/7940/942/2615/7305/79679/23495/80380/3635/640/472/384/2213/57045/4067/84868/8379/11006/1051/941/27242/3559/2064
BP	GO:0042310	vasoconstriction	78	0.521116	2.28241	1.11918e-07	1.60559e-06	9.40093e-07	6082	tags=51%, list=24%, signal=39%	147/1621/6915/133/6916/5743/1910/185/148/3357/27345/659/10800/5023/1906/342527/952/4313/2149/477/3363/3741/9732/59272/151/2244/3352/857/552/1908/150/6546/1909/6338/340481/2243/3274/553/152/624
BP	GO:0043367	CD4-positive, alpha-beta T cell differentiation	77	0.520035	2.27409	1.15257e-07	1.65047e-06	9.66371e-07	4192	tags=44%, list=17%, signal=37%	4092/8809/5734/3142/942/114836/864/114548/6363/6774/301/4063/3594/6095/3662/2625/91543/3122/10538/3569/64218/3566/3565/84695/6778/604/10892/941/3593/9760/57630/159296/84807/57089
BP	GO:0140053	mitochondrial gene expression	81	-0.542617	-2.2117	1.16382e-07	1.66355e-06	9.74026e-07	4934	tags=46%, list=20%, signal=37%	23107/51258/60493/51335/51081/10102/64960/285367/7284/51021/79675/283459/63899/54460/6150/6832/64951/84275/55699/23395/85476/64963/55168/124454/80324/9238/6182/64863/51373/80222/10128/6183/79072/4528/51654/10922/55157
BP	GO:1903034	regulation of response to wounding	144	0.415946	2.02911	1.17228e-07	1.67258e-06	9.79317e-07	5350	tags=43%, list=21%, signal=34%	5156/114897/6915/22915/2152/1398/9314/7056/710/4780/90102/4846/7057/10855/5627/4638/81565/64581/301/89790/10979/58189/948/2160/1906/5764/7852/2149/5728/240/5327/325/64094/18/3640/5340/3818/58529/10019/5604/2048/54361/2811/1361/7124/55966/2244/928/857/6558/23189/6484/2247/22876/8578/3480/350/5345/150/83999/5802/2155
BP	GO:0050864	regulation of B cell activation	114	0.448013	2.10467	1.18136e-07	1.68247e-06	9.85104e-07	5238	tags=47%, list=21%, signal=38%	11314/6422/1378/64092/695/3543/975/677/7099/7305/678/3398/374403/23495/10673/939/596/3635/972/952/640/472/2213/7805/4067/3569/10451/115352/3565/5788/6778/604/4208/6850/2048/22806/27242/54106/3574/79915/84433/3596/3071/940/4332/121260/6777/54440/30011/118460/55012/683/55024/8741
BP	GO:0002720	positive regulation of cytokine production involved in immune response	63	0.555648	2.32776	1.21443e-07	1.72642e-06	1.01084e-06	2972	tags=43%, list=12%, signal=38%	11126/8809/1604/3554/975/7099/10666/3815/114548/3553/567/64581/3133/948/23411/2625/972/91543/5336/6504/3134/7805/3569/3565/3805/10892/7189
CC	GO:0042611	MHC protein complex	25	0.7347	2.5327	1.23874e-07	1.75781e-06	1.02922e-06	4783	tags=68%, list=19%, signal=55%	567/3133/3125/972/3106/3115/3136/3113/3122/3134/3111/3117/3109/3126/3119/3108/3112
BP	GO:0006910	phagocytosis, recognition	28	0.720157	2.53892	1.27807e-07	1.81033e-06	1.05997e-06	1989	tags=43%, list=8%, signal=40%	10584/78989/8547/2220/5322/3543/2219/375033/64581/948/4153/722
CC	GO:0071013	catalytic step 2 spliceosome	71	-0.555773	-2.21639	1.2928e-07	1.82789e-06	1.07025e-06	4178	tags=46%, list=17%, signal=39%	57461/10286/55596/24148/6634/6629/9775/6627/220988/8175/55696/51340/27339/4116/6636/10946/8896/10992/22913/55094/23759/60625/6633/51645/9416/1659/51428/9343/6628/57819/6635/6637/24144
BP	GO:0050000	chromosome localization	66	-0.565643	-2.22761	1.36819e-07	1.931e-06	1.13062e-06	3990	tags=50%, list=16%, signal=42%	79998/4292/79643/1778/23212/81929/10540/23636/10726/10300/27436/150465/55166/9183/84722/4000/10403/83540/10615/81930/8697/81620/3619/81610/1062/9928/1063/11004/891/9212/55143/3833/113130
BP	GO:0043368	positive T cell selection	33	0.680234	2.49144	1.39504e-07	1.96535e-06	1.15074e-06	3797	tags=64%, list=15%, signal=54%	114836/1794/6774/4063/3594/596/3662/972/7535/915/916/64919/3707/10538/3569/5788/84695/6778/3593/9760/917
BP	GO:0010595	positive regulation of endothelial cell migration	96	0.482906	2.21309	1.44337e-07	2.02978e-06	1.18846e-06	3609	tags=36%, list=14%, signal=31%	7010/84913/5743/3162/147372/388/2113/5641/4780/659/4846/7057/5293/5294/301/3091/54453/1906/23411/2625/6237/57381/7424/23328/306/64094/207/6678/8829/9734/27286/2185/3690/284/5606
BP	GO:0002287	alpha-beta T cell activation involved in immune response	64	0.553453	2.33233	1.46591e-07	2.05411e-06	1.20271e-06	3421	tags=44%, list=14%, signal=38%	4092/8809/5734/8320/3142/942/114836/114548/6363/6774/301/4063/3594/6095/3662/2625/3122/10538/3569/64218/3566/3565/84695/6778/604/10892/941/3593
BP	GO:0002293	alpha-beta T cell differentiation involved in immune response	64	0.553453	2.33233	1.46591e-07	2.05411e-06	1.20271e-06	3421	tags=44%, list=14%, signal=38%	4092/8809/5734/8320/3142/942/114836/114548/6363/6774/301/4063/3594/6095/3662/2625/3122/10538/3569/64218/3566/3565/84695/6778/604/10892/941/3593
BP	GO:0032259	methylation	255	-0.387985	-1.8271	1.49166e-07	2.08646e-06	1.22165e-06	5791	tags=42%, list=23%, signal=32%	8468/64324/150572/1499/80349/10322/54880/56341/54093/79922/79813/2091/9463/11180/24140/10436/84274/55677/55011/55621/56154/51805/85002/55929/163589/4801/79872/6634/346171/29081/10664/55870/29072/387338/9836/63899/4552/11108/339175/80204/29104/2641/55798/56254/6830/56257/8731/1387/55039/30827/55124/4602/144233/54554/4802/10919/51742/9219/84661/9739/4234/26147/56980/63925/59336/10419/117246/64754/2…
BP	GO:0072594	establishment of protein localization to organelle	368	-0.352322	-1.72587	1.49969e-07	2.09396e-06	1.22604e-06	6140	tags=42%, list=24%, signal=32%	9520/7157/28972/59284/1026/4734/27072/10369/7175/6029/10531/6272/4137/51160/29098/5192/51024/90678/89781/64089/5191/55670/25836/3308/5898/55048/3837/6469/4836/5514/1649/6726/9688/54830/10469/27092/637/3320/6789/10890/55011/808/90637/10694/25913/65057/23633/8878/8027/27429/7332/5190/55929/7015/3309/10856/3301/51307/79158/55072/8841/7855/3728/10425/728489/9789/10456/23163/10075/63928/23471/51366/79…
BP	GO:2001020	regulation of response to DNA damage stimulus	197	-0.415685	-1.90599	1.52468e-07	2.12506e-06	1.24425e-06	4559	tags=39%, list=18%, signal=32%	637/2140/51720/2072/56154/51616/25913/8091/26272/64110/51750/55929/2332/10856/7913/11200/5429/29072/10116/9521/5716/51366/4193/9025/60/5111/54799/80237/7158/84501/7398/9984/10459/7335/4968/79968/51588/10902/8087/3297/10155/51547/10269/56897/8563/86/9400/4862/23126/7515/2187/1161/5883/5932/22954/150275/1663/1054/8607/55159/6787/1660/63979/56893/8295/26271/5591/672/24144/6944/142/1111/10635/2305/89…
MF	GO:0016712	oxidoreductase activity, acting on paired donors, with incorporation or reduction of molecular oxygen, reduced flavin or flavoprotein as one donor, and incorporation of one atom of oxygen	38	0.650265	2.48186	1.57886e-07	2.19277e-06	1.28389e-06	4227	tags=55%, list=17%, signal=46%	1571/3162/113612/51302/1544/1576/1559/8529/1555/1549/1558/1565/1543/64816/1548/66002/51004/1551/1573/1562/1579
BP	GO:0032722	positive regulation of chemokine production	67	0.545804	2.31666	1.57655e-07	2.19277e-06	1.28389e-06	4880	tags=54%, list=19%, signal=43%	90865/1436/9173/3162/4615/199/7099/1654/3553/7098/64581/3091/116/7097/8832/972/59341/4938/84868/3569/1958/3566/4155/245937/6850/54106/7124/3574/566/23765/64170/351/177/255231/326/3965
BP	GO:0090287	regulation of cellular response to growth factor stimulus	266	0.346963	1.83246	1.6383e-07	2.27129e-06	1.32987e-06	3421	tags=27%, list=14%, signal=24%	2658/6422/4091/2022/1634/9719/64399/4092/9839/10253/11117/147372/94/8425/4804/7049/659/65997/1003/7057/3553/51232/7043/3091/2627/28514/26524/27122/8321/9353/8646/10370/7323/10272/8837/6653/23411/2625/6425/83891/64388/6386/79176/10252/1028/7424/255743/57045/64094/64081/860/8516/27020/3565/5654/11167/967/168667/2201/58533/55959/57057/23191/80139/22938/494470/54361/5046/2255/3690/7041/345193/3593
BP	GO:0001913	T cell mediated cytotoxicity	46	0.603509	2.39991	1.64916e-07	2.28232e-06	1.33632e-06	4696	tags=52%, list=19%, signal=43%	912/3824/5551/3575/567/3133/3594/3821/3106/3136/11035/2213/3122/3134/5788/8417/3004/3593/563/911/1075/5532/177/3071
CC	GO:0005581	collagen trimer	80	0.499113	2.19299	1.67758e-07	2.31755e-06	1.35695e-06	1404	tags=29%, list=6%, signal=27%	10584/8685/78989/114897/8547/2220/713/11117/712/147372/6441/714/114905/2219/4481/1292/91522/4060/7373/1285/4153/1286/1291
BP	GO:0001501	skeletal system development	484	0.293687	1.64749	1.77348e-07	2.44572e-06	1.432e-06	3228	tags=23%, list=13%, signal=21%	1893/2658/3238/6422/5156/2022/654/64399/4092/9464/653/4094/5734/5915/94/7048/249/9060/22856/633/659/51119/864/3815/7043/92/7305/5549/340419/56034/3091/960/1969/8575/51141/6137/3214/1240/9770/8646/2690/10370/1906/2736/4522/5048/2737/2268/7704/4313/3212/25987/202151/4982/6615/3950/4920/8313/202018/3199/9104/649/10234/59341/83452/2114/29887/1028/8600/55790/3953/9451/309/9249/2202/7481/10507/6899/259…
BP	GO:0007178	transmembrane receptor protein serine/threonine kinase signaling pathway	331	0.32682	1.77448	1.80689e-07	2.48741e-06	1.45641e-06	3152	tags=25%, list=13%, signal=22%	2658/55273/6422/4091/2022/8483/654/84913/9719/4092/9839/10253/653/11117/3397/269/94/8425/7048/7049/2530/659/65997/1003/7057/2615/51232/7043/92/4035/2331/2353/11030/6774/2627/10979/26524/27122/8321/4093/8646/10370/7323/3717/10272/6653/23411/285704/6425/7431/83891/64388/9404/6688/4920/6386/79176/10252/1028/7122/255743/57045/3725/64081/860/8516/1958/653275/5654/11167/283375/168667/2201/58533/56940/9…
CC	GO:0098802	plasma membrane signaling receptor complex	172	0.394806	1.96753	1.84525e-07	2.53576e-06	1.48472e-06	4958	tags=37%, list=20%, signal=30%	3680/920/8809/11117/8807/269/8631/925/94/7048/10268/919/92/3560/7096/567/2059/55584/3572/7097/3594/50852/3681/3717/7535/6386/915/10077/916/973/3689/4067/3569/8516/57406/3676/6850/7189/3643/1742/974/2185/2811/10333/3559/3690/9180/2064/3684/917/10266/3588/54923/1139/3551/2895/657/1437/3695/2550/9358/3480/2814
BP	GO:0000727	double-strand break repair via break-induced replication	10	-0.909608	-2.21511	1.84977e-07	2.53752e-06	1.48575e-06	921	tags=90%, list=4%, signal=87%	8317/84296/4174/51659/4175/4172/4173/4176/4171
BP	GO:0071496	cellular response to external stimulus	268	0.345463	1.82746	1.86704e-07	2.55673e-06	1.497e-06	3402	tags=30%, list=14%, signal=26%	5138/6422/2022/558/654/2350/23710/5743/3162/2308/5734/54407/5166/7132/81631/27244/4780/11170/4615/199/659/8074/7099/3553/3428/834/7098/2353/9971/2621/51311/355/5105/968/596/9474/23411/8061/11337/1312/3600/120892/8795/467/29103/6506/6416/2642/10325/84557/477/1535/9451/7481/4067/7412/11345/468/4149/6715/4929/5788/3659/220441/358/283375/6548/10670/4214/6591/2752/3676/22938/4790/54361/6720/9531/5289/…
BP	GO:0046718	viral entry into host cell	132	0.426241	2.04712	1.90178e-07	2.59977e-06	1.5222e-06	3300	tags=33%, list=13%, signal=28%	339390/1949/8547/558/920/4684/10332/9023/1378/6614/10346/185/30835/1604/8519/975/942/2219/4061/1969/2621/2934/7852/972/1508/6504/5359/325/8692/2060/6554/6404/3949/8829/81603/6575/6520/3643/7113/6609/941/59272/3690
BP	GO:0045637	regulation of myeloid cell differentiation	170	0.392321	1.94909	1.91e-07	2.60645e-06	1.52611e-06	3421	tags=31%, list=14%, signal=27%	6422/1230/920/2124/714/2113/3059/7538/677/7099/4609/9935/92/1441/7305/7098/567/2353/6774/3091/28514/3398/9770/10272/3635/972/7704/11025/6688/4920/7107/10234/3665/5457/8600/1021/325/3707/4067/5295/3565/6348/55294/11006/4208/5925/7189/1051/2185/7124/7071/3593
BP	GO:0000910	cytokinesis	145	-0.453863	-2.00371	1.96161e-07	2.67222e-06	1.56462e-06	4695	tags=36%, list=19%, signal=29%	5581/79848/152015/808/80258/5300/6755/6683/6840/79998/79643/1069/29072/10755/23636/84501/28964/80179/10617/375/84936/9820/585/25909/79733/54784/84440/9371/9700/10899/990/8502/6242/26586/144455/3925/10733/3619/54443/994/24137/9493/9928/55165/1058/6790/9212/10112/29127/9055/1894/51203
BP	GO:0052548	regulation of endopeptidase activity	373	0.315239	1.72794	2.06859e-07	2.81307e-06	1.64709e-06	4102	tags=29%, list=16%, signal=25%	8530/5621/5743/2152/1378/7980/8434/2534/9314/2/3082/4804/6279/710/5641/83595/7057/1654/4609/114548/4803/51232/831/5627/3428/834/7078/1471/27141/6774/64581/960/4255/199713/5023/256394/2621/2934/10550/356/939/58189/653145/55081/9806/3717/1285/355/4824/8837/6653/23411/6622/3476/6280/3164/2149/7079/56925/684/58484/135/10653/6691/9451/3700/5176/7805/25816/4067/23151/489/3932/5271/207/5447/358/6694/526…
BP	GO:0002717	positive regulation of natural killer cell mediated immunity	29	0.701319	2.47879	2.13049e-07	2.89222e-06	1.69343e-06	3421	tags=55%, list=14%, signal=48%	11126/3824/117157/114836/10666/10125/3133/3822/4068/7409/3823/3134/3902/3805/259197/3593
BP	GO:0032814	regulation of natural killer cell activation	35	0.65666	2.45116	2.29714e-07	3.10232e-06	1.81645e-06	2245	tags=43%, list=9%, signal=39%	558/26191/639/10125/7305/3133/3822/2621/3717/2268/8993/3600/3134/10464/84868
BP	GO:0032623	interleukin-2 production	58	0.563031	2.34216	2.29338e-07	3.10232e-06	1.81645e-06	3128	tags=48%, list=12%, signal=42%	11326/920/5621/1378/6441/7538/942/5142/3553/5144/64581/301/79679/9971/729230/3662/2625/5336/916/7805/84868/5588/5788/3902/11006/10892/7189/941
BP	GO:0032663	regulation of interleukin-2 production	58	0.563031	2.34216	2.29338e-07	3.10232e-06	1.81645e-06	3128	tags=48%, list=12%, signal=42%	11326/920/5621/1378/6441/7538/942/5142/3553/5144/64581/301/79679/9971/729230/3662/2625/5336/916/7805/84868/5588/5788/3902/11006/10892/7189/941
BP	GO:0051048	negative regulation of secretion	147	0.413492	2.02293	2.33055e-07	3.14204e-06	1.8397e-06	5234	tags=40%, list=21%, signal=32%	1393/11314/6422/3162/2294/7133/7132/4889/8074/387129/415116/3553/301/729230/8529/8832/1906/22925/972/6622/2149/6688/91543/5530/83452/3598/3084/4129/2213/3134/5020/2697/3033/9525/18/9341/6720/64285/7124/151/3593/6814/1408/2771/7200/90007/55691/23208/7351/7032/7779/3071/2550/27342/3965/10062/51738/5908/150
BP	GO:0010389	regulation of G2/M transition of mitotic cell cycle	77	-0.539616	-2.18614	2.41166e-07	3.2458e-06	1.90045e-06	2017	tags=38%, list=8%, signal=35%	55920/65123/1017/84936/80279/11073/5889/1019/8317/5885/57504/57551/993/990/29980/995/26271/51514/60561/672/6240/1111/994/641/9928/1063/6790/891/9212
BP	GO:0043303	mast cell degranulation	47	0.599311	2.37428	2.5211e-07	3.38727e-06	1.98329e-06	4962	tags=57%, list=20%, signal=46%	11314/3162/2294/695/5880/3815/10125/5293/5294/8832/201294/5729/2268/5730/640/3598/8773/4067/3566/3565/6850/2242/8723/3596/27342/3965/9846
BP	GO:0006690	icosanoid metabolic process	108	0.466458	2.17972	2.55479e-07	3.42666e-06	2.00635e-06	2968	tags=34%, list=12%, signal=30%	2687/5322/6916/1571/5743/5740/113612/64174/1544/7132/3553/4056/2950/301/1559/2681/8529/7097/1555/1906/23411/972/5730/240/1549/241/1558/1565/10464/1543/57406/158584/1548/284541/66002/5742/6850
CC	GO:0000792	heterochromatin	53	-0.604065	-2.25714	2.66176e-07	3.56403e-06	2.08678e-06	2915	tags=47%, list=12%, signal=42%	23310/114991/57167/23076/222229/3065/79968/3297/84733/1059/10155/23468/3159/22880/11335/146956/1786/23512/1029/6839/3070/29128/3619/1058/2146
BP	GO:0051303	establishment of chromosome localization	65	-0.559539	-2.19491	2.68436e-07	3.58815e-06	2.10091e-06	3990	tags=49%, list=16%, signal=42%	79998/4292/79643/1778/23212/81929/10540/23636/10726/10300/27436/150465/55166/9183/84722/10403/83540/10615/81930/8697/81620/3619/81610/1062/9928/1063/11004/891/9212/55143/3833/113130
BP	GO:0034109	homotypic cell-cell adhesion	85	0.505859	2.26585	2.73059e-07	3.64373e-06	2.13345e-06	4221	tags=42%, list=17%, signal=35%	5156/114897/64805/22915/288/3043/1511/6352/375033/5294/3572/3717/5341/640/10077/8600/3716/4067/5588/3569/83706/29119/18/10076/10398/6850/10019/80139/2811/3690/5962/6814/2244/5329/3611/928
BP	GO:0002701	negative regulation of production of molecular mediator of immune response	37	0.632844	2.38877	2.75408e-07	3.66882e-06	2.14814e-06	3504	tags=49%, list=14%, signal=42%	4092/1378/3162/11213/7043/10225/6504/684/3598/2213/3134/115352/604/11006/335/7124/284/3456
BP	GO:0010273	detoxification of copper ion	13	0.863207	2.40915	2.81139e-07	3.73247e-06	2.18541e-06	1479	tags=62%, list=6%, signal=58%	4502/4489/4493/4501/4499/4494/4495/4496
BP	GO:1990169	stress response to copper ion	13	0.863207	2.40915	2.81139e-07	3.73247e-06	2.18541e-06	1479	tags=62%, list=6%, signal=58%	4502/4489/4493/4501/4499/4494/4495/4496
BP	GO:0071897	DNA biosynthetic process	160	-0.435975	-1.95293	2.93315e-07	3.88754e-06	2.2762e-06	4935	tags=42%, list=20%, signal=34%	9894/10111/5155/3776/3320/5426/10694/25913/65057/7486/26272/6714/7015/8658/5429/225689/27434/10574/5111/7027/8550/5982/10576/10459/4216/2264/55226/79075/22948/908/5981/286826/1736/10714/56897/7415/4221/50507/10575/3978/84296/54552/3326/54108/5422/5985/51659/23381/64785/3980/51514/5424/63922/5983/7298/7083/54107/5427/80119/4931/1111/7203/5984/4751/1063/9212/10721
BP	GO:0042093	T-helper cell differentiation	61	0.550874	2.31857	2.93983e-07	3.88982e-06	2.27753e-06	3421	tags=44%, list=14%, signal=38%	4092/8809/5734/3142/942/114836/114548/6363/6774/301/4063/3594/6095/3662/2625/3122/10538/3569/64218/3566/3565/84695/6778/604/10892/941/3593
BP	GO:0043277	apoptotic cell clearance	50	0.586673	2.33692	2.94848e-07	3.89468e-06	2.28038e-06	3300	tags=40%, list=13%, signal=35%	8685/8547/2220/558/2219/5880/10461/6347/7057/375033/4035/7305/301/729230/2621/948/114786/51552/391/3690
BP	GO:0002711	positive regulation of T cell mediated immunity	57	0.562555	2.33078	2.97975e-07	3.92936e-06	2.30069e-06	3726	tags=47%, list=15%, signal=40%	8809/912/1604/3554/975/114548/3553/567/3133/3125/3594/2625/91543/3106/6504/3136/3122/3134/3569/3565/5788/10892/8417/7189/3593/563/911
BP	GO:1903531	negative regulation of secretion by cell	126	0.428522	2.04148	2.99655e-07	3.94487e-06	2.30977e-06	5234	tags=40%, list=21%, signal=32%	1393/11314/6422/3162/2294/7133/7132/4889/8074/415116/3553/301/729230/8832/1906/6622/2149/6688/91543/5530/83452/3598/4129/2213/3134/2697/3033/9525/18/9341/6720/64285/151/3593/6814/1408/2771/7200/90007/55691/23208/7351/7779/3071/2550/27342/3965/10062/51738/5908/150
BP	GO:0043491	protein kinase B signaling	176	0.385499	1.92796	3.01471e-07	3.96211e-06	2.31986e-06	4915	tags=38%, list=20%, signal=30%	55273/7010/114897/2022/558/64805/85453/10253/2152/3059/10268/6352/677/10461/6347/7057/10855/3553/6366/6363/375033/5293/57333/23533/5294/10979/1969/2621/4824/23411/2625/6425/57142/65018/5728/2159/3084/6237/8600/22933/3488/8692/207/6348/4915/10019/3643/3479/7124/284/93492/6934/1236/3611/1411/59338/56917/2247/389400/1116/22876/940/2260/55512/409/3480
BP	GO:0030282	bone mineralization	107	0.460707	2.14472	3.18045e-07	4.17294e-06	2.44331e-06	3384	tags=36%, list=13%, signal=31%	1893/1230/7123/654/5743/5552/249/2824/659/8074/51119/7043/92/340419/3091/5764/2268/4920/8313/240/79176/29887/4958/9562/9451/7481/468/2697/6348/2201/154/4208/2185/54361/3479/22904/4256/7071
BP	GO:0002294	CD4-positive, alpha-beta T cell differentiation involved in immune response	63	0.542477	2.27258	3.2385e-07	4.242e-06	2.48374e-06	3421	tags=43%, list=14%, signal=37%	4092/8809/5734/3142/942/114836/114548/6363/6774/301/4063/3594/6095/3662/2625/3122/10538/3569/64218/3566/3565/84695/6778/604/10892/941/3593
BP	GO:0031570	DNA integrity checkpoint signaling	103	-0.500086	-2.11227	3.2549e-07	4.25637e-06	2.49215e-06	4141	tags=41%, list=16%, signal=34%	8091/26272/261726/51343/80198/1763/11200/10116/56658/4193/7158/9984/27339/79968/1017/4436/54962/83990/80279/9656/8563/11073/5883/25896/57551/84126/55159/1386/990/146956/29980/5591/51514/60561/835/672/1111/81620/51512/2177/641/8914
BP	GO:0002690	positive regulation of leukocyte chemotaxis	86	0.487613	2.19803	3.34002e-07	4.36039e-06	2.55306e-06	2765	tags=33%, list=11%, signal=29%	6387/1230/2358/1436/63940/6352/5641/5880/199/728/7057/6366/6363/719/729230/2621/1240/1906/5764/972/6688/59341/6504/7424/3569/3565/6348/245937
BP	GO:0035265	organ growth	149	0.405667	1.99085	3.34893e-07	4.36475e-06	2.55561e-06	4666	tags=42%, list=19%, signal=35%	1893/10253/10409/2395/5915/23414/7048/3142/148/7049/2099/57817/4061/340419/2627/60485/28514/26524/5999/26281/10370/1906/596/5997/10413/25987/1848/5728/7472/8470/3953/309/6909/207/5447/2296/10611/2121/221476/4208/11214/57057/5660/54796/2255/3479/3574/7528/32/1081/5292/57502/4921/367/7490/657/27230/2252/9241/2247/5950/9113/51124
BP	GO:0002824	positive regulation of adaptive immune response based on somatic recombination of immune receptors built from immunoglobulin superfamily domains	99	0.466422	2.14334	3.39008e-07	4.41105e-06	2.58272e-06	3997	tags=41%, list=16%, signal=35%	920/8809/912/1604/3554/695/975/10666/114548/3553/567/64581/3133/729230/3125/10673/3594/2625/91543/3106/6504/3136/3122/3134/5588/3569/3565/5788/6778/10892/8417/7189/6556/3263/7124/3593/563/911/64170/79915/84807
BP	GO:0051924	regulation of calcium ion transport	215	0.363932	1.87733	3.47511e-07	4.51419e-06	2.64311e-06	2878	tags=27%, list=11%, signal=24%	6387/1230/353514/10288/920/5621/5743/11027/1193/945/2534/10268/6352/5142/4846/6347/387129/5144/2669/4638/5294/3270/5023/126306/3603/5999/3306/8832/7852/596/9474/6622/2946/28954/11151/5311/2149/9104/5336/135/816/477/5031/1535/2056/57165/4067/287/115352/9446/30845/3958/79026/6348/6548/1394/6236/5957
BP	GO:0007098	centrosome cycle	103	-0.499855	-2.11129	3.49825e-07	4.53672e-06	2.65631e-06	3830	tags=41%, list=15%, signal=35%	55125/5902/51199/1069/79959/2801/54875/6566/23636/348654/56890/4957/11190/55226/10432/10806/1017/22995/55835/585/1639/55722/163786/7514/117178/9371/7840/7517/10403/55755/672/284403/4591/9793/10733/1111/899/3832/4751/6790/29901/6491
BP	GO:0043300	regulation of leukocyte degranulation	48	0.577069	2.31223	3.70404e-07	4.79566e-06	2.80792e-06	4962	tags=60%, list=20%, signal=49%	11314/3162/2294/84106/5880/3822/729230/8832/201294/2268/6688/640/3598/2213/3134/3689/4067/3566/3565/6850/3684/5724/2242/8723/3596/3071/27342/3965/9846
BP	GO:0018022	peptidyl-lysine methylation	94	-0.499191	-2.08049	3.72025e-07	4.80078e-06	2.81091e-06	5954	tags=49%, list=24%, signal=37%	143241/64324/150572/1499/80349/10322/54880/54093/79813/55677/55011/4801/55870/29072/29104/2641/6830/30827/4602/54554/4802/10919/51742/84661/9739/26147/63925/64754/23168/4221/11091/5929/6598/4000/3054/11137/1789/1786/10445/9869/672/6839/4800/90780/22976/2146
BP	GO:0034968	histone lysine methylation	94	-0.499191	-2.08049	3.72025e-07	4.80078e-06	2.81091e-06	5954	tags=49%, list=24%, signal=37%	143241/64324/150572/1499/80349/10322/54880/54093/79813/55677/55011/4801/55870/29072/29104/2641/6830/30827/4602/54554/4802/10919/51742/84661/9739/26147/63925/64754/23168/4221/11091/5929/6598/4000/3054/11137/1789/1786/10445/9869/672/6839/4800/90780/22976/2146
BP	GO:0050920	regulation of chemotaxis	198	0.380402	1.92651	3.82759e-07	4.93117e-06	2.88726e-06	5514	tags=38%, list=22%, signal=30%	6387/4908/1230/5156/64805/2358/1436/2152/63940/6352/5641/5880/199/659/728/6347/7057/6366/6363/719/729230/2621/80310/9353/3603/1240/1906/23077/5764/7852/972/6688/2841/59341/6504/4354/7424/64094/4067/10507/3569/64218/83700/3565/8829/6348/245937/2185/79890/2255/1843/57118/566/10716/4681/80031/1236/57556/1826/177/2247/3071/55079/2260/2249/54910/3965/1908/683/5800/6480/2155/5159/10509/708
BP	GO:1901654	response to ketone	185	0.379853	1.91224	4.09482e-07	5.26678e-06	3.08376e-06	2893	tags=31%, list=11%, signal=28%	6422/6915/5732/5734/2/54331/7049/10365/7057/4609/6366/1536/6363/2354/10628/7043/3490/2353/1080/2621/9353/7097/7054/2908/1906/3717/4824/5105/5729/8837/23411/8061/952/10413/107/595/687/8031/445/6898/4129/5327/5031/1535/11184/2056/5176/5020/207/6716/6715/5447/109/358/54206/4155/2230/6586
BP	GO:1902532	negative regulation of intracellular signal transduction	434	0.297151	1.65166	4.24426e-07	5.45005e-06	3.19107e-06	3648	tags=26%, list=15%, signal=23%	5138/6387/11314/6422/10253/5621/5743/11117/2308/11213/57447/7178/9709/148/27244/4780/2099/1847/2274/7099/26191/7057/1654/4609/1827/114548/3553/5144/51339/7078/2950/3091/9971/4170/54922/960/8382/1969/9611/284996/55584/9353/374403/54900/9770/8661/6095/596/79132/5048/5341/6653/80824/23411/9938/91663/972/6425/3476/54941/5997/65018/120892/1848/6615/6688/467/5728/472/440730/1191/10252/113791/1844/12637…
BP	GO:0042088	T-helper 1 type immune response	43	0.604459	2.37632	4.29257e-07	5.48574e-06	3.21197e-06	3421	tags=47%, list=14%, signal=40%	10148/8809/9173/3554/3142/7099/3553/6363/301/729230/3594/6504/84868/64218/3566/6778/7189/6556/941/3593
BP	GO:0006953	acute-phase response	47	0.589771	2.33648	4.29668e-07	5.48574e-06	3.21197e-06	3377	tags=47%, list=13%, signal=41%	9332/5743/1910/2/59307/57817/54658/3553/4153/445/5359/8600/2056/325/3700/3240/3569/6291/2157/6288/1051/7124
BP	GO:0032757	positive regulation of interleukin-8 production	58	0.553757	2.30358	4.30007e-07	5.48574e-06	3.21197e-06	3377	tags=40%, list=13%, signal=34%	2658/2152/11027/2219/4615/7099/929/3553/7098/7096/6774/64581/7097/51311/972/2149/914/8692/3569/51744/6850/54106/7124
MF	GO:0004497	monooxygenase activity	95	0.468534	2.14089	4.29403e-07	5.48574e-06	3.21197e-06	4239	tags=42%, list=17%, signal=35%	2327/1621/6916/1571/9023/3162/5740/113612/51302/1544/4846/1576/1559/8529/1592/7054/1555/2328/8564/5066/1549/1558/1582/1565/1543/1593/64816/1548/284541/66002/285440/26002/2329/51004/1551/1573/1562/5053/1579/6718
BP	GO:0014068	positive regulation of phosphatidylinositol 3-kinase signaling	73	0.513838	2.20619	4.56798e-07	5.81805e-06	3.40654e-06	3413	tags=40%, list=14%, signal=34%	7010/5156/1634/6403/3059/3082/6352/3815/5649/653361/56034/10870/80310/3717/4824/847/23411/2268/55615/2149/4920/2322/10507/118788/4915/3643/3479/7124/284
BP	GO:0002448	mast cell mediated immunity	49	0.591711	2.36612	4.57733e-07	5.82049e-06	3.40797e-06	4962	tags=57%, list=20%, signal=46%	11314/3162/2294/695/5880/3815/10125/5293/5294/8832/201294/5729/2268/5730/640/3598/8773/4067/3566/3565/6850/5272/2242/8723/3596/27342/3965/9846
MF	GO:0019199	transmembrane receptor protein kinase activity	77	0.504959	2.20816	4.59081e-07	5.82816e-06	3.41246e-06	4430	tags=42%, list=18%, signal=34%	1949/7010/5156/2022/558/1436/269/94/8425/7048/7049/659/10461/3815/51232/92/7075/2042/1969/4920/2322/2202/8829/4915/3643/2048/2064/4921/2047/238/657/4058
BP	GO:0050679	positive regulation of epithelial cell proliferation	177	0.377668	1.89254	4.65404e-07	5.89888e-06	3.45387e-06	4833	tags=37%, list=19%, signal=30%	1893/6387/2658/6422/7010/654/653/2152/3162/185/3397/94/3357/8742/659/728/26051/6369/4609/5293/6774/3091/7039/5764/8837/23411/57142/10413/595/3164/7472/7424/1535/3725/6899/207/49860/151306/5654/8829/2752/3676/80139/2255/3037/3479/3690/7124/2064/8324/3912/6934/367/1232/7051/657/1960/2252/9241/2247/283/383/116844/2260/10000/2683
MF	GO:0033218	amide binding	357	0.310915	1.69669	4.78972e-07	6.06104e-06	3.54881e-06	4061	tags=28%, list=16%, signal=24%	8685/1393/7433/10288/2350/10148/2358/5621/10332/912/1910/712/30835/5306/5360/4804/81631/10268/30061/4889/2947/23428/2639/7099/929/4481/4035/7096/1471/3133/4329/5023/1240/7097/3125/2690/948/6653/847/972/4311/2946/37/2028/4772/10316/3106/5530/3115/2642/1191/3136/3113/53354/2213/3953/5204/3122/3134/3689/3117/590/25999/5295/2346/6716/23621/6715/33/27232/134526/3949/1394/154/3643/4883/2048/5660/79777/…
BP	GO:0008217	regulation of blood pressure	170	0.384888	1.91216	4.83865e-07	6.11309e-06	3.57929e-06	5153	tags=36%, list=20%, signal=29%	147/6915/133/5547/5743/1910/3162/185/3043/1511/94/148/659/4846/5144/28514/3398/9424/5023/2621/8529/1359/1906/2643/128/2028/6196/2149/6296/2642/796/5443/477/7424/1535/10672/5020/66002/153/154/18/5742/4883/59272/7124/151/4204/5724/10911/10266/367/1579/170690/10391/7026/2740/552/1908/4041/5345/5800
CC	GO:0055029	nuclear DNA-directed RNA polymerase complex	82	-0.524564	-2.14081	4.88575e-07	6.15753e-06	3.60531e-06	6601	tags=56%, list=26%, signal=42%	8464/11036/9533/2967/5435/2068/80349/5436/84172/5438/6883/51616/10622/25885/6884/6878/5558/5441/6908/9519/11128/51728/2957/79871/6873/10621/171568/10623/55703/4646/23168/2960/5437/6877/123169/9400/2968/6874/2071/5439/5422/5557/8295/5433/23649/4172
CC	GO:0042581	specific granule	144	0.402159	1.96185	4.88955e-07	6.15753e-06	3.60531e-06	5617	tags=44%, list=22%, signal=34%	5199/2358/160364/945/5787/79895/7133/57153/5768/10855/1536/2040/719/1794/567/820/6515/6793/5023/948/8993/961/963/11026/8773/1535/306/30/3689/84329/54918/311/3240/55754/1669/57554/1182/23191/6947/4790/1265/3684/6814/7077/5329/126014/11322/4317/383/1116/22918/116844/121260/4057/7414/81619/25797/683/9522/2919/5873/11001/671
MF	GO:0005506	iron ion binding	131	0.423467	2.03499	4.91276e-07	6.17683e-06	3.61661e-06	4255	tags=36%, list=17%, signal=30%	6916/1571/9023/5740/113612/51302/3040/114757/2395/1544/316/1576/1559/9843/8529/1592/5033/7054/79966/1555/6622/240/1549/1558/1582/1036/1565/1543/1593/2495/64816/23479/1548/284541/66002/23474/2230/285440/1551/221120/79068/26234/1573/1562/5053/1579/6059
BP	GO:0071824	protein-DNA complex subunit organization	142	-0.448859	-1.97668	4.94233e-07	6.20405e-06	3.63255e-06	3993	tags=39%, list=16%, signal=33%	6884/5706/144108/6878/55929/29072/50809/23421/6908/9025/8289/4676/6830/6873/6749/55839/6599/51053/55832/55290/23198/6601/64754/2960/4678/6877/1616/23126/5889/6874/7343/6598/3159/2491/10036/401541/6597/54108/11198/8208/6602/23234/11339/54107/6944/3070/9735/81620/64105/1062/1063/4171/1058/55723/55355
BP	GO:0046605	regulation of centrosome cycle	42	-0.638681	-2.26593	5.03049e-07	6.30461e-06	3.69143e-06	3440	tags=45%, list=14%, signal=39%	79959/23636/348654/56890/55226/10432/55835/163786/7514/7840/7517/55755/672/284403/4591/10733/899/6790/6491
BP	GO:0044706	multi-multicellular organism process	198	0.378052	1.9146	5.11334e-07	6.39821e-06	3.74623e-06	3639	tags=30%, list=14%, signal=26%	1393/133/5743/8434/54407/23764/7056/7048/5069/2099/3726/659/64518/639/3553/2354/7043/92/3490/2353/5368/5023/116/2057/23641/59350/10370/51673/1906/5764/596/8061/952/4313/5997/1508/5066/796/3485/113/2056/3488/5020/84868/397/1543/207/2697/1394/5858/7216/10935/150921/54361/59272/151/79816/5724/85360/5671
BP	GO:0090257	regulation of muscle system process	210	0.364841	1.87398	5.25049e-07	6.55934e-06	3.84057e-06	3817	tags=30%, list=15%, signal=25%	147/6915/4092/9464/5743/1193/2308/4634/7133/7132/148/6442/5142/199/57817/4846/3815/5144/5294/4660/3270/5023/60675/3572/5999/1906/3778/2946/7140/5997/3164/2149/140628/59341/5530/796/816/477/255743/309/3488/5020/287/9446/30845/9732/2258/6548/29119/54206/221476/154/18/10398/59272/51086/3479/151/7528/5724/1025/10142
BP	GO:1902749	regulation of cell cycle G2/M phase transition	85	-0.523812	-2.14253	5.26166e-07	6.56283e-06	3.84262e-06	2017	tags=35%, list=8%, signal=33%	55920/65123/1017/84936/80279/11073/5889/1019/8317/5885/57504/57551/993/990/29980/995/26271/51514/60561/672/6240/1111/994/641/9928/1063/22976/6790/891/9212
BP	GO:0051383	kinetochore organization	16	-0.812963	-2.28977	5.32704e-07	6.63382e-06	3.88418e-06	2149	tags=75%, list=9%, signal=69%	55839/23126/10403/83540/10592/9735/81620/64105/1062/1063/1058/10051
BP	GO:0002673	regulation of acute inflammatory response	43	0.601421	2.36438	5.47091e-07	6.80217e-06	3.98275e-06	3377	tags=47%, list=13%, signal=40%	1776/5743/1910/695/4889/114548/3553/2950/5294/3133/3572/241/8600/325/2213/3569/3565/3818/9180/7124
BP	GO:0045670	regulation of osteoclast differentiation	57	0.556466	2.30555	5.50253e-07	6.83064e-06	3.99942e-06	3959	tags=47%, list=16%, signal=40%	6422/1230/7099/9935/7305/7098/2353/9770/10272/3635/11025/7107/10234/5457/8600/5295/3565/6348/55294/11006/7189/1051/7124/7071/3593/8111/1385
BP	GO:0030193	regulation of blood coagulation	61	0.541733	2.2801	5.53748e-07	6.86314e-06	4.01845e-06	4504	tags=44%, list=18%, signal=36%	5156/114897/6915/2152/7056/710/4780/4846/7057/10855/5627/948/2160/1906/2149/5327/18/5340/3818/10019/2048/2811/1361/2244/928/857/6484
MF	GO:0050431	transforming growth factor beta binding	21	0.765917	2.50075	5.62062e-07	6.95518e-06	4.07234e-06	2267	tags=57%, list=9%, signal=52%	2022/94/8425/7048/7049/7057/2615/7043/948/25987/57045/8692
BP	GO:0001914	regulation of T cell mediated cytotoxicity	38	0.631979	2.41207	5.63187e-07	6.95812e-06	4.07406e-06	4696	tags=55%, list=19%, signal=45%	912/3824/3575/567/3133/3594/3821/3106/3136/11035/2213/3122/3134/5788/8417/3593/563/911/5532/177/3071
BP	GO:0051053	negative regulation of DNA metabolic process	109	-0.474926	-2.01342	5.67214e-07	6.99683e-06	4.09673e-06	5453	tags=50%, list=22%, signal=40%	545/9370/4437/201163/84083/10111/5884/3776/2072/25913/65057/8091/64110/4292/6714/51750/81931/8658/23244/146059/51366/1676/3060/7270/7158/9984/10459/51053/23560/55226/4968/50485/3297/10155/4436/54962/2956/4221/9400/7515/2187/54552/990/56893/29980/3980/26271/24144/80119/142/1111/81620/641/8914/10721
BP	GO:0051346	negative regulation of hydrolase activity	315	0.320176	1.73224	5.80736e-07	7.14113e-06	4.18122e-06	4102	tags=30%, list=16%, signal=26%	1893/8530/10253/5621/5743/1378/7980/8434/9314/2/3082/710/3001/4846/7057/1654/4803/51232/831/5627/3428/4035/7078/1471/301/960/23645/199713/256394/2621/939/58189/653145/9806/1285/22925/6653/6622/3476/5997/1508/120892/3164/7079/9104/56925/79661/684/135/10653/10252/123016/6691/325/3953/3700/5176/25816/10507/5271/207/5447/3958/358/6694/5267/221476/9734/51129/4018/55031/5858/10935/5598/112401/335/5962/…
CC	GO:0034774	secretory granule lumen	300	0.321858	1.73057	5.80736e-07	7.14113e-06	4.18122e-06	5134	tags=38%, list=20%, signal=31%	1893/5199/1675/1621/7123/51316/22915/9535/3101/5552/1511/83716/2/3082/6279/710/6283/2219/5768/1668/64333/1667/7057/1654/10855/5627/7043/7078/1794/567/2950/820/25801/6037/2621/2934/201294/3671/847/2268/2517/8993/26578/6280/6386/240/4353/1191/5443/387263/7424/3700/30/10490/7450/23406/3240/1669/2665/83706/6678/6694/2157/5267/57554/411/5340/23191/6947/55860/55664/4790/8635/3479/335/1938/353/1265/8156…
BP	GO:0002228	natural killer cell mediated immunity	68	0.533206	2.2804	5.83494e-07	7.16381e-06	4.1945e-06	4880	tags=50%, list=19%, signal=40%	11126/3824/1398/117157/114836/10666/10125/3002/4818/3133/3822/4068/10225/201294/11151/7409/3823/3821/3106/3134/84868/3902/3805/3811/259197/55207/9437/3593/5272/57823/56253/409/6777/3965
MF	GO:0140101	catalytic activity, acting on a tRNA	84	-0.517119	-2.1145	5.89466e-07	7.22581e-06	4.2308e-06	4860	tags=46%, list=19%, signal=38%	24140/10056/285605/10799/55621/10667/55687/83707/51651/9836/283459/63899/56931/54901/80746/339175/55798/10940/55039/55699/23395/2193/64118/144233/80755/124454/4234/80324/57176/10248/127253/80222/23438/79897/11062/10785/6894/51367/55157
BP	GO:0008608	attachment of spindle microtubules to kinetochore	28	-0.702971	-2.27427	6.08207e-07	7.44388e-06	4.35848e-06	2017	tags=57%, list=8%, signal=53%	55920/27436/7756/10403/83540/10615/57405/81620/1062/4751/147841/11004/891/9212/29127/1894
BP	GO:0062207	regulation of pattern recognition receptor signaling pathway	90	0.47169	2.12885	6.13948e-07	7.50242e-06	4.39276e-06	5737	tags=52%, list=23%, signal=40%	11314/11027/11213/2099/7099/26191/1654/7098/7096/7097/948/26057/79132/55601/3662/57142/54941/9867/91543/3665/1535/6397/4067/23151/51296/115352/3659/9958/23547/2672/10333/54106/4814/8638/857/285852/79671/26060/121260/409/4057/10062/5802/708/7128/7100/54726
BP	GO:0046916	cellular transition metal ion homeostasis	105	0.445526	2.07738	6.21947e-07	7.58834e-06	4.44306e-06	3256	tags=36%, list=13%, signal=32%	2658/79689/654/1318/4502/5621/3162/4489/4493/4501/2395/4499/79901/4494/6279/30061/57817/212/4609/4495/3091/9843/4496/6280/51310/8031/3932/2495/9550/23479/1356/283375/6341/64116/91252/6556/3263/10463
BP	GO:0042178	xenobiotic catabolic process	24	0.723445	2.45319	6.37708e-07	7.76854e-06	4.54857e-06	3761	tags=71%, list=15%, signal=60%	1544/2947/54658/1576/1559/1555/2180/2946/1558/1565/30/1543/9446/1548/2944/2329/1429
CC	GO:0000428	DNA-directed RNA polymerase complex	83	-0.523637	-2.14001	6.39838e-07	7.78237e-06	4.55667e-06	7278	tags=60%, list=29%, signal=43%	6872/2966/1022/5442/8464/11036/9533/2967/5435/2068/80349/5436/84172/5438/6883/51616/10622/25885/6884/6878/5558/5441/6908/9519/11128/51728/2957/79871/6873/10621/171568/10623/55703/4646/23168/2960/5437/6877/123169/9400/2968/6874/2071/5439/5422/5557/8295/5433/23649/4172
MF	GO:0005024	transforming growth factor beta-activated receptor activity	12	0.858874	2.33466	6.52783e-07	7.92752e-06	4.64166e-06	565	tags=58%, list=2%, signal=57%	2022/269/94/8425/7048/7049/659
BP	GO:0016101	diterpenoid metabolic process	82	0.496516	2.19542	6.59315e-07	7.99445e-06	4.68085e-06	4110	tags=43%, list=16%, signal=36%	9227/125/5947/1544/5959/220/127/54658/1576/4035/124/1592/83875/128/54884/10170/8608/130/64577/1558/54659/126/1565/9249/1543/6715/8228/216/224/285440/151056/1551/57104/1562/317749
BP	GO:0061687	detoxification of inorganic compound	16	0.813394	2.41966	6.60923e-07	8.00156e-06	4.68501e-06	1479	tags=56%, list=6%, signal=53%	4502/4489/4493/4501/4499/4494/4495/847/4496
BP	GO:0009308	amine metabolic process	109	0.443614	2.07708	6.99788e-07	8.45901e-06	4.95285e-06	3594	tags=35%, list=14%, signal=30%	11185/1621/9464/4837/2639/4061/5153/9056/217/2034/9971/6303/112483/7054/27284/3067/6999/2643/2625/6622/1312/3176/8564/29958/4129/3689/7412/1543/4929/285671/18/635/26002/8639/6799/3684/4204/8942
BP	GO:0002820	negative regulation of adaptive immune response	58	0.547296	2.2767	7.27474e-07	8.78012e-06	5.14087e-06	2686	tags=38%, list=11%, signal=34%	339390/4092/11126/9173/1378/3824/64092/1604/3575/3821/6504/722/2213/3134/84868/3566/3565/5788/84695/604/11006/56940
BP	GO:0002279	mast cell activation involved in immune response	49	0.585557	2.34151	7.37211e-07	8.87031e-06	5.19367e-06	4962	tags=55%, list=20%, signal=44%	11314/3162/2294/695/5880/3815/10125/5293/5294/8832/201294/5729/2268/5730/640/3598/8773/4067/3566/3565/6850/2242/8723/3596/27342/3965/9846
BP	GO:0045089	positive regulation of innate immune response	126	0.418325	1.9929	7.36937e-07	8.87031e-06	5.19367e-06	4073	tags=40%, list=16%, signal=33%	5322/2358/11126/912/11027/3824/2534/2219/6352/117157/114836/7099/10666/10125/3055/81030/3428/7305/149628/64581/3133/7294/3822/4068/51311/4153/7409/3823/6688/5336/58484/3665/5359/3134/4067/115362/84868/3902/3805/6850/7189/9447/3263/259197/3593/3456/7520/64170/57169/3551
BP	GO:0031123	RNA 3'-end processing	83	-0.521542	-2.13144	7.64074e-07	9.17944e-06	5.37467e-06	3815	tags=41%, list=15%, signal=35%	134353/56903/6227/389421/22916/7884/81608/904/55339/56254/51728/6832/56915/51010/29894/9810/54512/3297/23404/1736/11052/123169/6626/25896/23144/25888/4686/51692/580/26173/5433/1478/26024/10898
BP	GO:0016053	organic acid biosynthetic process	285	0.331609	1.7674	7.65822e-07	9.18635e-06	5.37872e-06	5023	tags=39%, list=20%, signal=32%	2687/5322/6916/1571/5743/5740/51302/5947/1544/5166/220/3553/1576/51380/23417/4056/114876/2950/4942/301/9971/1559/2681/51141/10613/79966/1906/10157/4522/23411/972/2946/37/8803/10170/1491/6296/84869/8564/8604/27165/5730/9104/240/445/64577/10998/241/60496/1558/1806/1582/1036/1565/10464/55301/11160/6470/1543/1593/33/3990/216/284541/2746/4524/18/2752/337/5742/6850/54988/635/7376/335/10955/283985/2944/…
BP	GO:1901991	negative regulation of mitotic cell cycle phase transition	139	-0.439827	-1.93646	7.68933e-07	9.20956e-06	5.39231e-06	1691	tags=29%, list=7%, signal=27%	1030/65123/1017/701/84936/5933/80279/11073/7756/9183/5885/57551/55159/7517/990/10403/29980/26271/5591/51514/60561/835/55755/672/55055/9735/144455/4085/1111/81620/11130/9319/51512/641/1063/699/891/9212/7272/2146
BP	GO:0046394	carboxylic acid biosynthetic process	283	0.326105	1.74086	7.7756e-07	9.29867e-06	5.44448e-06	5023	tags=39%, list=20%, signal=31%	2687/5322/6916/1571/5743/5740/51302/5947/1544/5166/220/3553/1576/23417/4056/114876/2950/4942/301/9971/1559/2681/51141/10613/79966/1906/10157/4522/23411/972/2946/37/8803/10170/1491/6296/84869/8564/8604/27165/5730/9104/240/445/64577/10998/241/60496/1558/1806/1582/1565/10464/55301/11160/6470/1543/1593/33/3990/216/284541/2746/4524/18/2752/337/5742/6850/54988/635/7376/335/10955/283985/2944/875/64902/3…
BP	GO:0030888	regulation of B cell proliferation	61	0.537502	2.26229	8.02085e-07	9.57354e-06	5.60542e-06	5106	tags=54%, list=20%, signal=43%	11314/695/975/7099/7305/23495/10673/596/3635/972/952/640/472/2213/4067/10451/115352/3565/5788/604/4208/2048/22806/27242/54106/3574/79915/84433/3596/3071/4332/54440/683
CC	GO:0031983	vesicle lumen	305	0.323922	1.74353	8.02989e-07	9.57354e-06	5.60542e-06	5134	tags=38%, list=20%, signal=31%	1893/5199/1675/1621/7123/51316/22915/9535/3101/5552/1511/83716/2/3082/6279/710/6283/2219/5768/1668/64333/1667/7057/1654/10855/5627/7043/7078/1794/567/2950/820/25801/6037/2621/2934/356/201294/3671/847/2268/2517/8993/26578/6280/6386/240/4353/1191/5443/387263/7424/3700/30/10490/7450/23406/3240/23621/1669/2665/83706/6678/6694/2157/5267/57554/411/5340/23191/6947/55860/55664/4790/8635/3479/335/1938/353…
BP	GO:0045739	positive regulation of DNA repair	70	-0.53269	-2.12013	8.06045e-07	9.58081e-06	5.60968e-06	2857	tags=39%, list=11%, signal=34%	9025/60/5111/54799/84501/10459/10902/10155/86/4862/23126/7515/2187/5932/150275/1663/1054/8607/1660/8295/5591/672/6944/142/10635/2305/8914
BP	GO:0006520	cellular amino acid metabolic process	232	0.347304	1.814	8.05307e-07	9.58081e-06	5.60968e-06	4824	tags=43%, list=19%, signal=35%	2687/143941/2639/4846/51166/443/51380/3242/9056/4942/9971/4329/10249/7054/4482/54511/3067/6999/10157/4522/5805/594/3176/1491/2954/8564/8604/27165/445/6898/64577/420/92292/384/60496/1806/3155/3712/4143/1036/549/6567/6470/468/5860/27232/148811/216/2746/4524/137872/64116/2875/144193/18/132949/2752/593/389434/635/84706/51268/10955/10841/875/95/64902/4204/2805/2653/8942/9945/4548/10993/131669/11112/58…
MF	GO:0015026	coreceptor activity	42	0.615223	2.39692	8.10678e-07	9.62078e-06	5.63308e-06	3428	tags=50%, list=14%, signal=43%	2022/920/8434/925/4804/10268/942/7049/10663/92/2239/7852/285704/4920/23643/8829/23547/3676/941/3690/91355
BP	GO:0001523	retinoid metabolic process	79	0.489443	2.14671	8.11865e-07	9.62078e-06	5.63308e-06	4110	tags=42%, list=16%, signal=35%	9227/125/5947/1544/5959/220/127/54658/1576/4035/124/1592/83875/128/54884/10170/8608/130/64577/1558/54659/126/1565/9249/1543/8228/216/285440/151056/1551/57104/1562/317749
BP	GO:0060389	pathway-restricted SMAD protein phosphorylation	64	0.532451	2.24382	8.3899e-07	9.92721e-06	5.8125e-06	2856	tags=33%, list=11%, signal=29%	2658/4091/2022/654/4092/653/11117/269/94/7048/7049/659/7043/92/4035/11030/83891/6386/57045/168667/9958
BP	GO:0006936	muscle contraction	317	0.316743	1.7084	8.42838e-07	9.95769e-06	5.83035e-06	3609	tags=26%, list=14%, signal=22%	147/6915/4092/5743/1910/1193/3764/4634/9172/9499/2775/148/3357/6442/5142/7111/6324/1160/3815/5144/4638/8082/5294/4660/3270/5023/2934/126306/60675/1906/7852/3778/2946/7140/952/92241/5997/3164/6444/2149/10316/59341/796/384/477/3753/255743/309/5020/5348/800/6909/3363/3741/287/2697/9446/30845/6330/9732/2258/6548/29119/3781/154/18/10398/4621/6332/25802/55959/57057/59272/51086/7124/151/781/23171/3281/5…
BP	GO:0003170	heart valve development	60	0.542357	2.27422	8.49335e-07	1.00193e-05	5.86644e-06	2939	tags=38%, list=12%, signal=34%	5138/4091/10439/11117/7133/7132/7048/659/4846/639/7075/9353/2625/6615/4772/140628/8642/4208/6591/5925/26508/6586/57057
BP	GO:0140546	defense response to symbiont	258	0.337061	1.78229	8.6008e-07	1.01308e-05	5.93173e-06	3989	tags=32%, list=16%, signal=27%	8547/10346/3764/8519/665/5551/84282/6039/1668/10875/4615/91607/10379/1667/10964/26191/3459/3553/4939/81030/3428/51191/10060/7098/7097/51311/3437/3594/201294/26057/6041/596/79132/55601/9474/64135/104/54941/3600/91543/24138/684/10077/3665/197259/5359/4600/4599/3669/11035/4938/6397/29800/3434/3433/200316/3445/8692/3569/60489/3565/5654/5788/3659/81603/57337/9958/9447/50489/55763/3455/54106/10955/3593…
BP	GO:1901992	positive regulation of mitotic cell cycle phase transition	82	-0.516962	-2.10979	8.7081e-07	1.02418e-05	5.99671e-06	3815	tags=49%, list=15%, signal=42%	134353/7015/23236/80174/6868/25942/4193/7027/56257/8450/55920/1981/55835/328/5889/1019/163786/51433/8317/51434/57504/286053/993/51692/9700/990/27085/995/26271/51514/8697/6241/51529/6240/81620/994/891/6491/11065/113130
MF	GO:0003712	transcription coregulator activity	424	-0.336103	-1.66764	8.73486e-07	1.02579e-05	6.00612e-06	4901	tags=31%, list=19%, signal=26%	28996/7020/3148/10848/8148/6883/55806/55274/51741/10084/51188/10915/51616/8409/64900/9442/8091/11074/7332/23013/6878/2130/1487/359948/23286/5987/55929/51586/5715/10856/23613/9830/24148/10987/55588/10438/1820/8841/9994/3728/90390/25942/29777/79364/6756/7088/115098/8289/84922/56254/4848/158586/26292/1387/57649/57761/83637/88/57472/10401/55749/23076/7158/219541/8535/10589/6599/51053/9219/3065/171023…
BP	GO:0015850	organic hydroxy compound transport	226	0.352509	1.82748	8.7827e-07	1.02986e-05	6.02997e-06	4630	tags=33%, list=18%, signal=27%	6387/114897/654/140/185/1071/28234/5360/2824/3931/4061/4609/4481/143425/10351/4035/114876/1080/114879/5023/6523/26281/83849/11309/948/366/6580/6622/65018/364/1191/135/54762/10998/5443/4129/10599/1582/5020/57586/9525/6554/3990/3949/358/8273/1394/18/337/6850/4547/4790/114885/9218/3690/7376/335/55207/151/27183/10802/706/114884/23539/5244/6582/360/1244/857/23208/341359/116519/8647/5950/6342
BP	GO:0032715	negative regulation of interleukin-6 production	42	0.612839	2.38763	8.90044e-07	1.04211e-05	6.10168e-06	5676	tags=64%, list=23%, signal=50%	11213/3082/10365/7099/26191/9971/2621/8832/3635/6504/408/84868/140885/11006/54106/7124/23208/131450/79671/3071/409/27342/51738/91662/55024/671/7128
BP	GO:0050855	regulation of B cell receptor signaling pathway	17	0.799536	2.4025	8.91843e-07	1.04266e-05	6.10489e-06	2408	tags=53%, list=10%, signal=48%	11314/975/5583/26191/9404/640/2213/4067/115352
BP	GO:0045926	negative regulation of growth	222	0.349512	1.80103	9.10602e-07	1.063e-05	6.22401e-06	2929	tags=27%, list=12%, signal=24%	2658/6422/51316/4502/4489/4493/4501/2395/4499/4494/94/7048/147906/2273/5641/8835/659/1654/6595/583/4495/3091/60485/55602/9353/5999/58189/10370/85004/596/23411/1027/57142/5997/4496/5728/11007/684/92304/9538/7481/3488/9706/10507/8692/55384/123879/2697/64218/55840/604/2258/8829/221476/153/154/5925/3621/6586/58529
BP	GO:0010824	regulation of centrosome duplication	37	-0.636533	-2.20092	9.28427e-07	1.0822e-05	6.3364e-06	3440	tags=46%, list=14%, signal=40%	79959/23636/348654/56890/55226/10432/55835/163786/7514/7840/7517/55755/672/4591/10733/899/6491
BP	GO:1900262	regulation of DNA-directed DNA polymerase activity	12	-0.854496	-2.21411	9.36654e-07	1.08855e-05	6.37357e-06	2544	tags=83%, list=10%, signal=75%	5111/5982/79075/84296/5985/51659/64785/63922/5983/5984
BP	GO:1900264	positive regulation of DNA-directed DNA polymerase activity	12	-0.854496	-2.21411	9.36654e-07	1.08855e-05	6.37357e-06	2544	tags=83%, list=10%, signal=75%	5111/5982/79075/84296/5985/51659/64785/63922/5983/5984
BP	GO:0071280	cellular response to copper ion	24	0.715605	2.4266	9.53831e-07	1.10687e-05	6.48084e-06	2575	tags=62%, list=10%, signal=56%	4502/5621/4489/4493/4501/4499/4494/4780/4495/6622/4496/84557/1543/23621/358
BP	GO:0060485	mesenchyme development	270	0.334063	1.77318	9.56774e-07	1.10864e-05	6.49122e-06	3200	tags=26%, list=13%, signal=23%	55273/6422/10439/2022/4092/6943/9464/10253/653/1910/10409/2294/8320/23414/3082/94/7048/147906/3357/677/7049/659/90102/4846/4609/3553/7043/2042/80709/3091/10979/10370/1906/596/2625/57142/10413/5311/202151/6615/140628/6386/8313/202018/5728/7472/3084/10252/309/7481/10507/6899/6909/3569/7258/8642/64218/30812/2296/84695/8829/4208/6591/26508/57057/80139/54796/54361/2487/2255/3037
CC	GO:0060205	cytoplasmic vesicle lumen	303	0.324725	1.74808	9.66126e-07	1.11782e-05	6.54499e-06	5134	tags=38%, list=20%, signal=31%	1893/5199/1675/1621/7123/51316/22915/9535/3101/5552/1511/83716/2/3082/6279/710/6283/2219/5768/1668/64333/1667/7057/1654/10855/5627/7043/7078/1794/567/2950/820/25801/6037/2621/2934/356/201294/3671/847/2268/2517/8993/26578/6280/6386/240/4353/1191/5443/387263/7424/3700/30/10490/7450/23406/3240/23621/1669/2665/83706/6678/6694/2157/5267/57554/411/5340/23191/6947/55860/55664/4790/8635/3479/335/1938/353…
CC	GO:0030880	RNA polymerase complex	85	-0.518136	-2.11932	9.69923e-07	1.12056e-05	6.56102e-06	7278	tags=60%, list=29%, signal=43%	6872/2966/1022/5442/8464/11036/9533/2967/5435/2068/80349/5436/84172/5438/6883/51616/10622/25885/6884/6878/5558/7015/5441/6908/9519/11128/51728/2957/79871/6873/10621/171568/10623/55703/4646/23168/2960/5437/6877/123169/9400/2968/6874/2071/5439/5422/5557/8295/5433/23649/4172
BP	GO:0034121	regulation of toll-like receptor signaling pathway	66	0.521311	2.20675	1.00432e-06	1.15859e-05	6.7837e-06	5737	tags=55%, list=23%, signal=42%	11314/11027/11213/2099/26191/1654/7098/7096/7097/948/3662/57142/9867/91543/3665/1535/4067/23151/115352/3659/23547/2672/10333/54106/4814/857/285852/26060/121260/409/4057/10062/5802/7128/7100/54726
CC	GO:0044815	DNA packaging complex	88	-0.508571	-2.10488	1.0117e-06	1.16539e-05	6.82349e-06	4294	tags=45%, list=17%, signal=38%	58531/25913/65057/55929/7015/10856/50809/23310/8289/60/54799/54441/27127/55193/65980/6599/64940/10902/6601/86/6598/5885/10274/6597/8607/29781/8940/10403/6602/83540/8295/9918/10592/6944/57405/54892/147841/1058/64151/10051
BP	GO:0060420	regulation of heart growth	57	0.547221	2.26724	1.03262e-06	1.18774e-05	6.95436e-06	4614	tags=51%, list=18%, signal=42%	10409/23414/7048/7049/57817/2627/60485/5999/26281/10370/1906/5997/10413/1848/5728/7472/6909/221476/4208/57057/3479/7528/32/5292/7490/657/9241/2247/5950
BP	GO:0032615	interleukin-12 production	59	0.531411	2.23487	1.05402e-06	1.20881e-05	7.07771e-06	3421	tags=44%, list=14%, signal=38%	353514/11213/7099/7057/6363/7098/64581/3603/1240/7097/3394/51311/948/961/5336/3106/6504/959/10464/7805/3659/6850/7189/4790/54106/3593
BP	GO:0032655	regulation of interleukin-12 production	59	0.531411	2.23487	1.05402e-06	1.20881e-05	7.07771e-06	3421	tags=44%, list=14%, signal=38%	353514/11213/7099/7057/6363/7098/64581/3603/1240/7097/3394/51311/948/961/5336/3106/6504/959/10464/7805/3659/6850/7189/4790/54106/3593
BP	GO:0046688	response to copper ion	35	0.63658	2.37621	1.06293e-06	1.21627e-05	7.12141e-06	2575	tags=51%, list=10%, signal=46%	4502/5621/4489/4493/4501/4499/4494/4780/3931/4495/6622/4496/6649/5066/84557/1543/23621/358
BP	GO:0034508	centromere complex assembly	20	-0.748824	-2.24744	1.06364e-06	1.21627e-05	7.12141e-06	2980	tags=70%, list=12%, signal=62%	23421/55839/4678/23126/2491/401541/11339/3070/9735/64105/1062/1063/1058/55355
BP	GO:0036336	dendritic cell migration	29	0.678561	2.39835	1.06581e-06	1.21698e-05	7.12559e-06	1711	tags=45%, list=7%, signal=42%	1230/81704/6352/6366/6363/5294/2059/729230/2621/7852/6688/240/6504
BP	GO:0002369	T cell cytokine production	38	0.621449	2.37188	1.07448e-06	1.22173e-05	7.15336e-06	2972	tags=53%, list=12%, signal=46%	4092/8809/1604/3554/7133/975/114548/3553/567/729230/1178/2625/91543/6504/3134/3569/3565/11006/10892/7189
BP	GO:0002724	regulation of T cell cytokine production	38	0.621449	2.37188	1.07448e-06	1.22173e-05	7.15336e-06	2972	tags=53%, list=12%, signal=46%	4092/8809/1604/3554/7133/975/114548/3553/567/729230/1178/2625/91543/6504/3134/3569/3565/11006/10892/7189
BP	GO:0061448	connective tissue development	236	0.341058	1.78017	1.07465e-06	1.22173e-05	7.15336e-06	5478	tags=37%, list=22%, signal=29%	1893/2658/654/4092/9464/653/4094/5915/94/7048/22856/633/659/864/9517/340419/3091/9971/960/80310/59350/2690/1906/8837/6653/23411/2737/10424/7704/25987/6615/6688/4920/8313/202018/649/3400/25979/59341/55790/9451/309/2202/7481/8692/860/1958/30812/5447/3213/2121/4208/6591/5925/55959/91252/2487/4256/91355/57561/1396/84159/38/79068/10891/51320/7490/657/9241/2247/1116/7076/9421/2249/55512/23516/7482/3373…
BP	GO:1900046	regulation of hemostasis	63	0.526333	2.20495	1.07623e-06	1.22175e-05	7.1535e-06	4504	tags=43%, list=18%, signal=35%	5156/114897/6915/2152/7056/710/4780/4846/7057/10855/5627/948/2160/1906/2149/5327/18/5340/3818/10019/2048/2811/1361/2244/928/857/6484
BP	GO:0008210	estrogen metabolic process	35	0.636111	2.37446	1.08542e-06	1.23041e-05	7.20418e-06	4625	tags=54%, list=18%, signal=44%	5156/1544/54658/1576/1559/1558/54659/1565/25976/1543/3294/51170/6783/1551/7923/51144/7366/59338/6817
BP	GO:0031667	response to nutrient levels	406	0.295202	1.61676	1.08961e-06	1.23337e-05	7.22151e-06	4101	tags=29%, list=16%, signal=24%	6422/6915/2350/23710/133/9227/5743/3162/2308/54407/2/5166/7048/7538/81631/249/27244/4780/11170/22856/57817/659/8074/54658/583/1536/3428/663/27141/9971/4255/2621/1592/7054/2690/2180/355/5105/968/596/9474/6653/847/23411/11337/594/1312/3600/595/4982/120892/467/29103/59341/4353/445/2642/10325/5443/84557/3485/1582/1535/2056/22933/9451/7481/9706/590/5020/7412/1543/11345/468/4149/207/6716/6715/5447/6554…
BP	GO:0000245	spliceosomal complex assembly	36	-0.645374	-2.22041	1.09215e-06	1.23446e-05	7.22793e-06	4287	tags=53%, list=17%, signal=44%	58155/57461/10907/24148/8175/51340/27339/10946/1653/6633/79833/9416/4686/6635/22827/6732/6637/10713/6631
MF	GO:0016684	oxidoreductase activity, acting on peroxide as acceptor	51	0.574792	2.31171	1.11235e-06	1.25548e-05	7.351e-06	3622	tags=41%, list=14%, signal=35%	5743/1193/3040/3043/114757/7837/27244/4056/2950/2878/847/2946/2954/3047/4353/3048/241/5742/10935/2880/3042
BP	GO:0098534	centriole assembly	34	-0.652732	-2.19422	1.12215e-06	1.26472e-05	7.40506e-06	3830	tags=56%, list=15%, signal=47%	55125/1069/79959/23636/124093/56890/10432/1017/22995/55835/55722/163786/7840/55755/672/284403/4591/10733/6491
MF	GO:0004601	peroxidase activity	47	0.57476	2.27701	1.16136e-06	1.30703e-05	7.65282e-06	3622	tags=43%, list=14%, signal=36%	5743/1193/3040/3043/114757/7837/4056/2950/2878/847/2946/2954/3047/4353/3048/241/5742/10935/2880/3042
BP	GO:0002886	regulation of myeloid leukocyte mediated immunity	56	0.545478	2.25136	1.18267e-06	1.3291e-05	7.78206e-06	4962	tags=59%, list=20%, signal=47%	1776/11314/3162/2294/695/84106/5880/7305/3133/729230/6372/8832/201294/2268/6688/640/3598/2213/3689/4067/3566/3565/6850/3684/5724/2242/9188/8723/383/3596/27342/3965/9846
BP	GO:0043161	proteasome-mediated ubiquitin-dependent protein catabolic process	357	-0.345703	-1.68988	1.22356e-06	1.37309e-05	8.03961e-06	5133	tags=34%, list=20%, signal=28%	25897/90850/7184/6613/10869/7319/6469/9097/55968/1649/5700/2272/1047/23510/84164/90637/283807/5714/2768/821/10616/26272/23609/5704/25820/5706/54476/10213/1642/51343/127544/8405/3309/64795/378884/10425/10116/5716/10075/56658/54442/4193/55741/8312/3304/10755/25852/84861/5094/55298/122809/117584/79089/131405/26268/84727/8450/57761/23640/81858/55139/26233/80020/23532/80028/6599/11011/51283/1453/7341/…
CC	GO:0000123	histone acetyltransferase complex	57	-0.576626	-2.19315	1.24264e-06	1.38853e-05	8.12999e-06	4296	tags=51%, list=17%, signal=42%	6883/51616/6878/55929/10856/7862/60/6873/1387/54799/9678/6885/10902/56943/6877/11091/86/55689/6874/56970/26009/3054/8607/1386/8295/27154/10445/54107/6944
CC	GO:0031248	protein acetyltransferase complex	57	-0.576626	-2.19315	1.24264e-06	1.38853e-05	8.12999e-06	4296	tags=51%, list=17%, signal=42%	6883/51616/6878/55929/10856/7862/60/6873/1387/54799/9678/6885/10902/56943/6877/11091/86/55689/6874/56970/26009/3054/8607/1386/8295/27154/10445/54107/6944
CC	GO:1902493	acetyltransferase complex	57	-0.576626	-2.19315	1.24264e-06	1.38853e-05	8.12999e-06	4296	tags=51%, list=17%, signal=42%	6883/51616/6878/55929/10856/7862/60/6873/1387/54799/9678/6885/10902/56943/6877/11091/86/55689/6874/56970/26009/3054/8607/1386/8295/27154/10445/54107/6944
BP	GO:0002710	negative regulation of T cell mediated immunity	27	0.710143	2.47682	1.26138e-06	1.40747e-05	8.24089e-06	4696	tags=56%, list=19%, signal=45%	339390/4092/3824/3575/3821/6504/2213/3134/5788/11006/56940/3456/5532/383/3071
BP	GO:0051298	centrosome duplication	60	-0.560531	-2.15387	1.27196e-06	1.41543e-05	8.28753e-06	3830	tags=43%, list=15%, signal=37%	55125/1069/79959/23636/348654/56890/55226/10432/1017/22995/55835/55722/163786/7514/7840/7517/10403/55755/672/284403/4591/9793/10733/899/29901/6491
BP	GO:0044344	cellular response to fibroblast growth factor stimulus	99	0.451531	2.07491	1.27214e-06	1.41543e-05	8.28753e-06	4809	tags=44%, list=19%, signal=36%	6422/64399/10253/7538/4804/8826/6352/677/8074/6347/7057/4609/678/960/26281/2625/3164/10252/8036/64094/6899/6909/8692/860/27020/51552/55959/91612/54361/2255/55614/345193/9702/2729/1373/2250/23768/1960/2252/9241/2247/2260/2249/23769
BP	GO:0019373	epoxygenase P450 pathway	18	0.781245	2.41419	1.2984e-06	1.44261e-05	8.44665e-06	4227	tags=72%, list=17%, signal=60%	1571/1544/1559/8529/1555/1549/1558/1543/1548/66002/1573/1562/1579
CC	GO:0045335	phagocytic vesicle	130	0.414448	1.98811	1.32043e-06	1.465e-05	8.57776e-06	3531	tags=37%, list=14%, signal=32%	219972/5322/55647/5880/1520/51762/1536/83547/653361/7096/567/3133/2934/7097/4689/10435/948/7454/9482/9474/7431/8993/11151/3106/6504/4353/11031/8773/3136/9367/1535/3134/306/84329/23673/311/51552/752/1182/6850/57192/9341/6556/10333/5289/54106/6814/3633
BP	GO:0010863	positive regulation of phospholipase C activity	37	0.609698	2.3014	1.32292e-06	1.46569e-05	8.58177e-06	5970	tags=73%, list=24%, signal=56%	5156/64805/942/1902/148/3357/2099/728/3702/3815/7294/5330/6401/10316/5031/2769/5724/11331/2247/283/2260/552/1909/5159/5741/9290/553
MF	GO:0015631	tubulin binding	304	-0.361146	-1.73626	1.39727e-06	1.54587e-05	9.05128e-06	3844	tags=30%, list=15%, signal=26%	4741/9857/1641/23637/2332/51199/1069/23046/3799/11104/2010/29072/2801/23170/23287/4733/6902/284076/4134/9576/90990/9141/10297/8851/10808/10300/56890/55920/28964/23291/27436/9448/4968/28981/22948/7411/3796/27101/4976/55835/585/5058/4133/23093/1639/27229/84295/7756/10128/84722/9654/6904/8480/57551/9371/283431/7840/8733/6905/23394/146909/55342/57609/60509/10615/81930/347240/81624/55755/672/9793/3925…
BP	GO:0042267	natural killer cell mediated cytotoxicity	66	0.517277	2.18968	1.41168e-06	1.55523e-05	9.10609e-06	4880	tags=48%, list=19%, signal=39%	11126/3824/1398/114836/10666/10125/3002/4818/3133/3822/4068/201294/11151/7409/3823/3821/3106/3134/84868/3902/3805/3811/259197/55207/9437/3593/5272/57823/56253/409/6777/3965
BP	GO:0007565	female pregnancy	172	0.376089	1.87425	1.41057e-06	1.55523e-05	9.10609e-06	3639	tags=30%, list=14%, signal=26%	1393/133/5743/8434/54407/7056/7048/5069/2099/3726/659/639/3553/2354/7043/3490/2353/5368/116/2057/23641/10370/51673/5764/596/8061/952/4313/5997/1508/5066/796/3485/113/2056/3488/5020/84868/397/207/2697/1394/5858/7216/10935/150921/54361/59272/151/79816/85360/5671
BP	GO:0051607	defense response to virus	257	0.335304	1.76512	1.41025e-06	1.55523e-05	9.10609e-06	3989	tags=32%, list=16%, signal=27%	8547/10346/3764/8519/665/5551/84282/6039/1668/10875/4615/91607/10379/1667/10964/26191/3459/3553/4939/81030/3428/51191/10060/7098/7097/51311/3437/3594/201294/26057/6041/596/79132/55601/9474/64135/104/54941/3600/91543/24138/684/10077/3665/197259/5359/4600/4599/3669/11035/4938/6397/29800/3434/3433/200316/3445/8692/3569/60489/3565/5654/5788/3659/81603/57337/9958/9447/50489/55763/3455/54106/10955/3593…
BP	GO:0045954	positive regulation of natural killer cell mediated cytotoxicity	25	0.702847	2.42289	1.4314e-06	1.57474e-05	9.22029e-06	3421	tags=56%, list=14%, signal=48%	11126/3824/114836/10666/10125/3133/3822/4068/7409/3823/3134/3902/259197/3593
BP	GO:0045132	meiotic chromosome segregation	67	-0.547743	-2.1627	1.45062e-06	1.59364e-05	9.33098e-06	4434	tags=45%, list=18%, signal=37%	2072/56159/56154/4292/80198/27030/225689/10919/701/51547/83990/29893/5889/5885/9700/29781/4439/83540/146956/898/80010/10592/9319/2177/9134/699/10051/9232/7272/7153
CC	GO:0046540	U4/U6 x U5 tri-snRNP complex	29	-0.678754	-2.21815	1.48187e-06	1.62343e-05	9.50537e-06	3862	tags=66%, list=15%, signal=56%	23658/10907/24148/6634/153527/6636/26121/10465/9128/9129/6633/9416/9343/6628/57819/6635/6637/10713/25804
CC	GO:0097526	spliceosomal tri-snRNP complex	29	-0.678754	-2.21815	1.48187e-06	1.62343e-05	9.50537e-06	3862	tags=66%, list=15%, signal=56%	23658/10907/24148/6634/153527/6636/26121/10465/9128/9129/6633/9416/9343/6628/57819/6635/6637/10713/25804
BP	GO:1904062	regulation of cation transmembrane transport	299	0.32123	1.73504	1.52036e-06	1.66327e-05	9.73864e-06	3164	tags=25%, list=13%, signal=22%	1393/53826/1318/51185/5621/1193/288/2534/2273/10268/5142/57817/6347/1520/6324/387129/5144/2040/5649/2669/7881/6844/5294/729230/3270/5023/126306/5999/3306/1906/9474/6622/2946/28954/5997/11151/65018/5311/2149/9104/5336/54800/2745/477/5031/3753/1535/2056/57165/5348/4067/30820/287/148811/23479/9446/30845/6330/2258/967/79026/6548/53827/3781/54413/482/1394/154/6236/4208/2048/1742/2185/1612/59272
BP	GO:0006479	protein methylation	137	-0.449286	-1.97301	1.53489e-06	1.67448e-05	9.8043e-06	3427	tags=34%, list=14%, signal=30%	6634/10664/55870/29072/11108/80204/29104/2641/56254/6830/1387/30827/4602/54554/4802/10919/51742/84661/9739/26147/63925/59336/10419/64754/23168/51547/4221/11091/10196/65094/5929/6598/4000/3054/6628/11137/1789/1786/10445/9869/23512/672/6839/4800/90780/22976/2146
BP	GO:0008213	protein alkylation	137	-0.449286	-1.97301	1.53489e-06	1.67448e-05	9.8043e-06	3427	tags=34%, list=14%, signal=30%	6634/10664/55870/29072/11108/80204/29104/2641/56254/6830/1387/30827/4602/54554/4802/10919/51742/84661/9739/26147/63925/59336/10419/64754/23168/51547/4221/11091/10196/65094/5929/6598/4000/3054/6628/11137/1789/1786/10445/9869/23512/672/6839/4800/90780/22976/2146
BP	GO:0071260	cellular response to mechanical stimulus	65	0.51807	2.19304	1.58835e-06	1.73039e-05	1.01317e-05	4218	tags=48%, list=17%, signal=40%	5138/2022/654/5743/5734/54407/7132/4615/7099/3553/834/7098/51311/355/8795/6416/477/1535/7481/3659/358/6548/4214/4790/9531/1265/1647/664/8738/2729/943
BP	GO:0044403	biological process involved in symbiotic interaction	258	0.333102	1.76136	1.59495e-06	1.73517e-05	1.01596e-05	3785	tags=30%, list=15%, signal=26%	339390/1949/8547/558/920/4684/1436/10332/9023/1378/6614/10346/185/30835/6441/1604/1511/8519/975/942/2219/6352/4615/1667/4061/1105/2040/820/1969/2621/2934/6372/3717/4153/7852/972/8993/1508/6504/64922/9367/5359/325/3434/3725/8692/2060/9525/6554/6404/3949/8829/91392/6348/25827/8819/81603/6575/6520/5340/54210/3643/22938/7113/6609/51510/79720/941/59272/9218/3690/55207/27183/566/3078/5091/1025
BP	GO:0045580	regulation of T cell differentiation	140	0.400142	1.95106	1.60954e-06	1.74861e-05	1.02383e-05	4880	tags=41%, list=19%, signal=33%	10288/4092/1378/7048/3142/942/10875/864/639/114548/6363/10125/3575/301/729230/939/3594/2736/5105/3662/2737/2625/972/7704/7535/3600/914/3122/3111/3707/3566/3565/5788/84695/604/3659/3902/11006/10892/6850/941/3559/2064/3593/3574/3456/9760/57630/84807/84433/2309/1960/56253/3071/940/6777/3965
BP	GO:0043030	regulation of macrophage activation	54	0.551247	2.25738	1.63435e-06	1.77311e-05	1.03818e-05	2590	tags=44%, list=10%, signal=40%	11326/90865/8530/9173/57817/23729/7099/7057/8832/6095/972/6622/120892/9867/7107/472/2213/84868/3569/3566/3565/5788/3949/6348
BP	GO:0010569	regulation of double-strand break repair via homologous recombination	50	-0.582411	-2.16464	1.64312e-06	1.78016e-05	1.04231e-05	4300	tags=52%, list=17%, signal=43%	56154/64110/51750/55929/10856/29072/60/54799/7158/10459/10902/86/9400/23126/2187/5932/8607/63979/56893/8295/6944/142/1111/10635/8914/10721
BP	GO:0014002	astrocyte development	40	0.609825	2.36286	1.65658e-06	1.79142e-05	1.0489e-05	3417	tags=52%, list=14%, signal=45%	2358/10319/712/6279/728/7099/3459/3553/4035/28514/7431/6280/4920/135/1021/3913/3569/3949/3845/7124/5663
BP	GO:0044409	entry into host	138	0.401983	1.95175	1.65809e-06	1.79142e-05	1.0489e-05	3300	tags=31%, list=13%, signal=27%	339390/1949/8547/558/920/4684/10332/9023/1378/6614/10346/185/30835/1604/8519/975/942/2219/4061/1969/2621/2934/7852/972/1508/6504/5359/325/8692/2060/6554/6404/3949/8829/81603/6575/6520/3643/7113/6609/941/59272/3690
BP	GO:0001649	osteoblast differentiation	205	0.35872	1.83307	1.6719e-06	1.80385e-05	1.05618e-05	3440	tags=29%, list=14%, signal=25%	2658/6422/4091/654/9464/3399/1052/8519/3082/249/3726/659/8074/2274/51232/92/340419/10979/1969/8321/3572/9770/8646/2736/847/2737/6096/1291/10413/202151/6615/8313/3199/3400/63923/1021/7424/255743/9970/57045/7481/3488/10507/3569/9902/468/860/207/2697/30812/6348/2201/4208/6591/1051/54361/3479/7124/91355/50846
BP	GO:0045123	cellular extravasation	69	0.507813	2.19418	1.67641e-06	1.80624e-05	1.05757e-05	3619	tags=41%, list=14%, signal=35%	10894/6387/6403/5734/3554/10164/1398/6347/6366/58494/5293/6402/5294/2650/729230/80310/6401/961/11035/7412/5175/140885/83700/6404/3676/7124/5724/566
BP	GO:0003007	heart morphogenesis	233	0.344268	1.796	1.70202e-06	1.83131e-05	1.07225e-05	3228	tags=27%, list=13%, signal=24%	55273/4091/7010/10439/2022/4092/9464/653/2294/4634/23414/9510/94/7048/10427/4889/3357/7049/659/4846/2274/4061/3091/2627/60485/28514/8321/9353/7054/55081/10370/1906/2625/57142/10413/5311/6615/140628/8313/7472/55212/79933/3084/10252/5457/55742/7122/9249/3725/7481/6899/6909/8642/2697/2296/8829/4208/6591/26508/6586/57057/3643/3037/79977
BP	GO:0002825	regulation of T-helper 1 type immune response	29	0.671275	2.3726	1.70685e-06	1.83399e-05	1.07382e-05	3421	tags=52%, list=14%, signal=45%	8809/9173/3554/3142/3553/6363/301/729230/3594/6504/84868/3566/6556/941/3593
BP	GO:0046209	nitric oxide metabolic process	68	0.521329	2.2296	1.71788e-06	1.84331e-05	1.07928e-05	4447	tags=50%, list=18%, signal=41%	5743/5740/3043/9314/199/10365/4846/7099/3553/64581/7097/948/1906/3717/6095/2643/5311/961/9104/445/1191/384/140885/207/5447/3643/2185/10333/7124/64902/706/1373/857/4317
BP	GO:0045860	positive regulation of protein kinase activity	352	0.301035	1.64473	1.72061e-06	1.84371e-05	1.07951e-05	4758	tags=36%, list=19%, signal=30%	4908/11314/353514/920/10253/5621/1436/7048/942/8826/6283/6352/148/3357/659/7099/7057/1654/3815/3553/6366/6363/10125/5649/653361/7098/3937/23533/4739/5294/56034/221472/10979/116/2621/80310/7039/9770/2690/2081/1906/3717/2180/5609/23411/1027/6622/65018/5311/595/7164/120892/8795/4920/8313/55507/2322/7436/1191/3084/285489/796/376497/8600/7424/2056/959/11035/23328/10464/7481/4665/207/1958/3565/5788/225…
BP	GO:0010466	negative regulation of peptidase activity	229	0.344224	1.78933	1.7294e-06	1.8506e-05	1.08355e-05	4102	tags=31%, list=16%, signal=26%	1893/8530/5621/5743/1378/7980/8434/9314/2/3082/710/7057/1654/4803/51232/831/5627/3428/4035/7078/1471/960/199713/256394/2621/939/58189/653145/9806/1285/6653/6622/3476/1508/3164/7079/56925/684/135/10653/6691/3700/5176/25816/5271/207/5447/358/6694/5267/221476/4018/55031/5858/10935/112401/7124/5037/334/10972/7077/10879/26998/57630/10406/8301/1410/5272/1992/5329/351
BP	GO:0002507	tolerance induction	27	0.705443	2.46043	1.73865e-06	1.85796e-05	1.08786e-05	5676	tags=63%, list=23%, signal=49%	10288/11213/7048/3133/1178/640/3106/916/4067/84868/11006/3559/326/3965/29126/868/7128
BP	GO:0016042	lipid catabolic process	287	0.323862	1.72963	1.79868e-06	1.91949e-05	1.12388e-05	5234	tags=36%, list=21%, signal=29%	345557/5322/51302/1544/313/8074/2639/375775/3553/1576/23417/3290/5294/56898/8529/1592/5051/5330/84693/5105/2110/5048/6653/83875/2517/37/5333/84129/5336/3988/9651/57733/3712/22933/10449/549/30/2581/1593/207/6716/6715/55862/57406/158584/33/3033/83752/54363/8228/3990/3949/35/1376/66002/1962/337/6609/5320/5332/335/7124/51170/51390/6783/151056/32/27329/5095/338328/5140/1666/34/5106/57104/38/5826/1373/…
BP	GO:0032465	regulation of cytokinesis	83	-0.512664	-2.09516	1.81037e-06	1.92933e-05	1.12965e-05	5039	tags=42%, list=20%, signal=34%	23503/201163/5581/79848/808/5300/6755/6683/6840/79998/1069/29072/10755/23636/28964/80179/84936/585/25909/79733/84440/9371/990/8502/144455/10733/994/9493/9928/6790/9212/10112/29127/9055/1894
BP	GO:0002675	positive regulation of acute inflammatory response	24	0.705239	2.39145	1.85135e-06	1.97033e-05	1.15365e-05	4014	tags=54%, list=16%, signal=46%	5743/695/4889/3553/5294/3133/3572/241/8600/3569/9180/7124/1236
BP	GO:0007080	mitotic metaphase plate congression	44	-0.611278	-2.19548	1.8778e-06	1.9934e-05	1.16716e-05	3990	tags=52%, list=16%, signal=44%	79998/79643/23212/81929/10540/23636/10726/27436/9183/84722/10403/83540/81930/8697/81620/1062/9928/11004/891/9212/55143/3833/113130
MF	GO:0004527	exonuclease activity	61	-0.544362	-2.10137	1.87884e-06	1.9934e-05	1.16716e-05	4827	tags=52%, list=19%, signal=42%	129563/57455/201626/23016/64858/10111/5426/23019/9937/7486/22803/54840/115752/4848/56915/51010/57472/64421/54512/23357/23404/27301/328/57109/1653/5883/90806/51692/5424/81875/9156/2237
BP	GO:0043434	response to peptide hormone	369	0.295346	1.60927	1.88066e-06	1.9934e-05	1.16716e-05	5359	tags=36%, list=21%, signal=29%	6387/1393/133/5743/1910/185/2308/1398/5166/10580/9021/8835/4780/677/7049/51762/4609/3553/1536/81565/6844/6774/301/2650/9971/8615/51141/7097/7054/2690/1906/3717/5105/8837/6653/847/23411/6775/1027/7832/3164/64506/7079/59341/445/11031/2642/5443/23484/5327/376497/1535/1036/3716/3488/5020/4067/5295/5588/4149/3484/1959/207/6716/6715/1958/5447/3033/4929/6778/6548/54206/1394/9734/2875/896/5925/2549/5791/…
CC	GO:0000151	ubiquitin ligase complex	251	-0.378283	-1.78202	1.89011e-06	2.0007e-05	1.17144e-05	4453	tags=34%, list=18%, signal=28%	55208/283807/2861/648/9442/10616/26272/25820/7332/1642/51343/127544/79872/8405/64795/6015/8445/55072/10425/10116/90390/54442/80204/9025/25852/8216/56254/84861/26268/84727/7322/8450/440590/81858/9810/26233/23532/80028/10336/8535/9616/64422/7335/23291/55832/29882/550/9968/26267/701/84246/84733/27101/9820/64682/126433/84231/116138/57643/80012/11146/1161/51433/7186/51434/59349/84961/84759/1163/580/26…
BP	GO:0034405	response to fluid shear stress	31	0.66339	2.40252	1.91763e-06	2.0271e-05	1.18689e-05	3200	tags=58%, list=13%, signal=51%	4091/4092/5743/7980/9314/4780/10365/4846/7043/10370/4313/5311/445/207/4208/2185/5598/3037
BP	GO:0006400	tRNA modification	65	-0.537866	-2.1099	1.92455e-06	2.03167e-05	1.18957e-05	5366	tags=52%, list=21%, signal=41%	6741/112970/11180/24140/285605/55621/51002/26610/55687/9836/63899/56931/54901/27304/339175/55798/126789/55039/64172/64118/144233/4234/55226/80324/84267/54522/127253/84705/11062/10785/81605/51654/6894/54517
BP	GO:0045429	positive regulation of nitric oxide biosynthetic process	37	0.60379	2.2791	1.93168e-06	2.03645e-05	1.19237e-05	3456	tags=54%, list=14%, signal=47%	5743/3043/9314/199/10365/7099/3553/64581/948/1906/3717/5311/445/1191/207/3643/2185/10333/7124/64902
BP	GO:2001057	reactive nitrogen species metabolic process	69	0.506395	2.18806	1.95794e-06	2.06137e-05	1.20696e-05	4447	tags=49%, list=18%, signal=41%	5743/5740/3043/9314/199/10365/4846/7099/3553/64581/7097/948/1906/3717/6095/2643/5311/961/9104/445/1191/384/140885/207/5447/3643/2185/10333/7124/64902/706/1373/857/4317
BP	GO:0032613	interleukin-10 production	54	0.547759	2.24309	1.97332e-06	2.07199e-05	1.21317e-05	5135	tags=56%, list=20%, signal=44%	353514/3082/7099/28951/7305/6774/64581/28514/7097/80380/3662/961/5336/959/2213/10464/3569/3565/11006/6850/27242/54106/3593/177/4317/3596/940/3965/54440/29126
BP	GO:0032653	regulation of interleukin-10 production	54	0.547759	2.24309	1.97332e-06	2.07199e-05	1.21317e-05	5135	tags=56%, list=20%, signal=44%	353514/3082/7099/28951/7305/6774/64581/28514/7097/80380/3662/961/5336/959/2213/10464/3569/3565/11006/6850/27242/54106/3593/177/4317/3596/940/3965/54440/29126
BP	GO:0032970	regulation of actin filament-based process	342	0.304004	1.6504	1.99484e-06	2.09178e-05	1.22476e-05	3391	tags=25%, list=13%, signal=22%	6387/4908/6422/7010/5156/9535/23500/1436/8477/390/3397/5734/388/85458/1398/3059/22998/4070/8826/1902/2824/5142/11170/5880/7111/51225/90102/6369/203228/6366/5144/3055/7043/4035/2042/10174/22899/2059/10979/148170/10602/2934/9353/5999/10435/29109/1906/7454/5341/91663/11151/9639/961/5066/684/79933/171024/9873/477/123016/6624/7481/23406/5295/397/287/83700/2258/8829/6548/29119/120/11214/27236/25802/107…
BP	GO:0042063	gliogenesis	257	0.333317	1.75466	2.01343e-06	2.10845e-05	1.23452e-05	4351	tags=33%, list=17%, signal=28%	64805/2358/23500/1436/10319/712/7133/6279/5583/728/6347/7099/3459/4609/3553/5649/443/4035/6774/301/28514/3398/729230/3572/7097/4118/56978/5764/7852/5048/2737/57142/7431/4692/9639/6280/8867/23405/4920/3400/5728/1191/3084/135/23224/1021/22933/3953/3913/57165/4067/4665/3569/1959/207/30812/147495/3949/6348/482/4915/430/5604/2185/3845/54587/2255/27242/7124/2064/5663/2290/566/664/706/3912/116448/351/36…
BP	GO:0036005	response to macrophage colony-stimulating factor	11	0.858724	2.27915	2.07948e-06	2.17181e-05	1.27162e-05	1096	tags=45%, list=4%, signal=43%	5138/1436/7099/5153/7097
BP	GO:0036006	cellular response to macrophage colony-stimulating factor stimulus	11	0.858724	2.27915	2.07948e-06	2.17181e-05	1.27162e-05	1096	tags=45%, list=4%, signal=43%	5138/1436/7099/5153/7097
BP	GO:0052126	movement in host environment	160	0.389156	1.91596	2.12194e-06	2.21321e-05	1.29586e-05	3436	tags=31%, list=14%, signal=27%	339390/1949/8547/558/920/4684/10332/9023/1378/6614/10346/185/30835/1604/8519/975/942/2219/4061/1969/2621/2934/7852/972/1508/6504/5359/325/8692/2060/9525/6554/6404/3949/8829/91392/81603/6575/6520/3643/7113/6609/51510/79720/941/59272/9218/3690/55207/27183
CC	GO:0061695	transferase complex, transferring phosphorus-containing groups	221	-0.385334	-1.79763	2.1385e-06	2.22751e-05	1.30424e-05	4018	tags=49%, list=16%, signal=41%	81669/85417/5584/6872/56288/5261/2966/5571/1022/30849/5442/56655/55697/29108/8464/1032/5256/11036/892/9533/2967/219771/6794/5260/1026/5435/5255/2068/80349/5436/8812/84172/5438/2547/6883/5426/51616/10622/5631/25885/6884/53632/6878/5558/221823/7015/5441/8408/30837/904/6908/9519/11128/51728/122809/2957/5111/79871/6873/10621/171568/8851/10459/5576/5565/10623/91/1017/5291/55703/4646/23168/2960/5437/68…
BP	GO:0030316	osteoclast differentiation	86	0.468992	2.11408	2.15074e-06	2.23432e-05	1.30822e-05	3614	tags=41%, list=14%, signal=35%	6422/1230/1436/975/3726/7099/9935/7305/7098/2353/1969/9770/10272/5048/3635/11025/7107/10234/29887/5457/8600/9855/5295/3565/6348/55294/11006/7189/1051/79705/22904/7124/7071/3593/8111
BP	GO:0031099	regeneration	165	0.380996	1.87629	2.14847e-06	2.23432e-05	1.30822e-05	3704	tags=34%, list=15%, signal=29%	6387/558/133/3162/4837/9314/975/3082/7048/6442/7049/57817/4609/54658/81565/6665/301/7294/2621/3717/5764/8837/596/2737/1027/4313/1459/10413/595/2322/9104/5728/5530/3913/306/59352/3725/3569/3484/2697/10076/5340/347/58529/337/5604/1051/2255/3479/1361/4131/7124/4814/8324/4548/706
MF	GO:0003684	damaged DNA binding	62	-0.546835	-2.12758	2.17622e-06	2.25779e-05	1.32196e-05	6327	tags=63%, list=25%, signal=47%	5886/11284/6118/64858/2068/56852/3148/2547/2072/25913/9937/7486/1642/5429/54840/5111/1387/8450/7374/64421/6119/7158/4968/4595/4436/6996/2956/328/7515/5932/2071/2189/55247/5424/672/9401/2237/641/10721
BP	GO:0072538	T-helper 17 type immune response	38	0.61334	2.34093	2.18267e-06	2.26148e-05	1.32413e-05	4192	tags=53%, list=17%, signal=44%	4092/114836/6774/64581/4063/3594/6095/3662/10538/5588/3569/3565/84695/10892/2048/3593/23765/64170/84807/57089
CC	GO:0005838	proteasome regulatory particle	19	-0.758461	-2.2463	2.29958e-06	2.3732e-05	1.38954e-05	5703	tags=84%, list=23%, signal=65%	5718/5700/5714/5704/5706/5717/10213/5715/5719/11047/5709/5702/5701/5708/5707/5710
BP	GO:0032956	regulation of actin cytoskeleton organization	303	0.318157	1.71272	2.29949e-06	2.3732e-05	1.38954e-05	3362	tags=26%, list=13%, signal=23%	6387/4908/6422/7010/5156/9535/23500/1436/8477/390/3397/5734/388/85458/1398/3059/22998/4070/8826/1902/2824/11170/5880/7111/51225/90102/6369/203228/6366/3055/7043/4035/2042/10174/22899/2059/10979/148170/10602/2934/9353/5999/10435/29109/1906/7454/5341/91663/11151/9639/961/5066/684/79933/171024/9873/123016/6624/7481/23406/5295/397/83700/8829/6548/120/11214/27236/25802/10788/23191/10411/391/2185/54361…
MF	GO:0019787	ubiquitin-like protein transferase activity	389	-0.340801	-1.6776	2.29665e-06	2.3732e-05	1.38954e-05	4207	tags=30%, list=17%, signal=25%	9666/9442/10616/11074/23295/26272/23609/147339/25820/7332/54476/55128/23220/5987/389898/140825/117854/127544/79872/10107/9830/64795/378884/6015/23624/10477/55072/55120/10425/90390/10193/148066/10075/56658/51366/4193/80204/9025/23352/56254/55298/54542/113878/117584/131405/26268/7329/391712/7322/7681/26190/81858/9810/10401/26233/81559/8535/9616/27339/51283/64422/7428/23291/81786/9968/10293/26267/72…
CC	GO:0000152	nuclear ubiquitin ligase complex	42	-0.61683	-2.1884	2.35943e-06	2.43177e-05	1.42383e-05	2175	tags=45%, list=9%, signal=41%	10336/8535/29882/701/84733/9820/64682/80012/51433/51434/84759/580/51239/140459/672/8697/51529/991/11065
BP	GO:0007099	centriole replication	31	-0.664567	-2.18869	2.38219e-06	2.452e-05	1.43568e-05	3830	tags=58%, list=15%, signal=49%	55125/1069/79959/23636/56890/10432/1017/22995/55835/55722/163786/7840/55755/672/284403/4591/10733/6491
BP	GO:0019395	fatty acid oxidation	99	0.44434	2.04187	2.44506e-06	2.51341e-05	1.47163e-05	6117	tags=49%, list=24%, signal=38%	114757/5166/2639/127/23417/56898/8529/2110/128/37/84129/2170/3712/10449/549/30/207/55862/33/5447/3033/83752/54363/35/1376/1962/51179/285440/32/1666/34/38/79602/10891/5826/3032/8647/6342/23600/55268/2108/55289/5264/51422/11001/8013/51/1892/5825
BP	GO:0071774	response to fibroblast growth factor	105	0.429884	2.00445	2.4569e-06	2.52226e-05	1.47682e-05	4809	tags=42%, list=19%, signal=34%	6422/64399/10253/7538/4804/8826/6352/677/8074/6347/7057/4609/678/960/26281/2625/3164/10252/8036/64094/6899/6909/8692/860/27020/51552/55959/91612/54361/2255/55614/345193/9702/2729/1373/2250/23768/1960/2252/9241/2247/2260/2249/23769
BP	GO:0042537	benzene-containing compound metabolic process	23	0.718584	2.4262	2.47529e-06	2.53782e-05	1.48593e-05	3594	tags=61%, list=14%, signal=52%	1571/2947/51166/54658/7054/6999/2946/8564/64577/30/6716/2053/2944/8942
BP	GO:0006790	sulfur compound metabolic process	302	0.315844	1.70158	2.56939e-06	2.63085e-05	1.54039e-05	4641	tags=31%, list=18%, signal=26%	2687/1634/9348/1910/1193/2949/29940/2395/9054/10164/5166/51703/2947/4780/9060/22856/633/2639/51166/10855/51380/23417/8801/2950/2681/27010/337876/10550/10249/4482/27284/2690/6999/9806/2180/84693/10157/4522/641372/6622/2946/56548/8803/1491/6296/2954/641371/6506/4143/1036/55790/27430/10090/9469/27232/23479/9446/134526/6482/79717/4524/80704/23474/8509/84836/54988/635/686/6821/51268/2944/875/284/6799/…
BP	GO:0072001	renal system development	293	0.317033	1.70068	2.62403e-06	2.68329e-05	1.5711e-05	3200	tags=25%, list=13%, signal=22%	6422/4091/7010/5156/654/4092/6943/1910/185/3399/10409/2294/3764/5915/9510/4070/8826/639/4609/4774/2650/28514/80310/79659/9353/1592/8842/1285/2736/4824/8837/596/1286/847/2737/2625/4311/7704/10413/2028/5311/120892/9104/445/10252/1028/384/123016/2674/255743/3913/5176/7481/25976/5175/8692/55083/8516/5087/1958/8642/30812/2296/8829/168667/284541/4208/26508/55959/5613/54361/2255/3037
BP	GO:0046599	regulation of centriole replication	16	-0.788522	-2.22093	2.63644e-06	2.68897e-05	1.57442e-05	3440	tags=75%, list=14%, signal=65%	79959/23636/56890/10432/55835/163786/7840/55755/672/4591/10733/6491
CC	GO:0005770	late endosome	241	0.33893	1.77382	2.63613e-06	2.68897e-05	1.57442e-05	4668	tags=35%, list=19%, signal=29%	1393/285195/8530/1318/9227/6614/55340/146894/6441/388/5222/643834/7178/5641/1520/83547/114876/3125/653145/201294/7852/968/9482/6653/84866/972/120892/2149/55240/9741/11342/246213/684/51028/9476/84557/9367/8291/2674/3122/309/201931/973/10490/84174/55754/23621/57406/3109/9525/3949/967/51552/643847/3126/1182/8417/5604/3643/57192/5660/6556/51510/79720/114885/79443/5289/55207/78992/3593/27183/9842/1001…
CC	GO:0030496	midbody	169	-0.410906	-1.8506	2.73353e-06	2.78436e-05	1.63028e-05	3348	tags=31%, list=13%, signal=27%	129138/11104/54434/23170/115098/9025/23636/127933/5501/10297/55770/10726/10300/302/55920/60412/27436/55226/5291/84936/5911/54784/54536/1663/84722/84440/23265/9371/10899/9960/221477/60509/8502/10615/3619/54443/1062/24137/4751/9493/9928/1063/55165/6790/9212/10112/55143/332/29127/9055/1894/259266
BP	GO:0055017	cardiac muscle tissue growth	64	0.519231	2.18811	2.75865e-06	2.8063e-05	1.64312e-05	4614	tags=47%, list=18%, signal=38%	23414/7048/148/7049/57817/2627/60485/5999/26281/10370/1906/5997/10413/5728/7472/8470/6909/2296/10611/221476/4208/11214/57057/3479/7528/5292/657/9241/2247/5950
CC	GO:0031091	platelet alpha granule	86	0.464847	2.0954	2.76549e-06	2.80961e-05	1.64506e-05	5418	tags=48%, list=22%, signal=38%	1675/22915/5552/6403/2/3082/710/5768/7057/5627/7043/2621/948/3671/6622/9749/1191/7424/10490/7450/5175/83706/6678/2157/5340/3479/3690/6814/334/2244/5099/351/7058/928/87/7076/197/5473/5345/12/2162
BP	GO:0001911	negative regulation of leukocyte mediated cytotoxicity	25	0.692969	2.38884	2.78909e-06	2.82992e-05	1.65695e-05	4880	tags=64%, list=19%, signal=52%	3824/1398/3575/3133/3821/3106/2213/3134/84868/5788/3805/5272/5532/3071/409/3965
BP	GO:0050869	negative regulation of B cell activation	34	0.645931	2.39549	2.79534e-06	2.83259e-05	1.65852e-05	2545	tags=47%, list=10%, signal=42%	11314/6422/1378/64092/695/7305/3398/374403/23495/3635/640/472/2213/7805/4067/604
CC	GO:0019866	organelle inner membrane	415	-0.328387	-1.62956	2.81175e-06	2.84554e-05	1.6661e-05	5510	tags=36%, list=22%, signal=28%	54534/4709/84419/6391/3954/4722/55967/7352/7350/51318/60558/286148/28977/64979/23107/79944/7108/51650/3313/151188/94081/6576/10730/1350/9782/51258/84274/10469/23333/4833/4723/7384/55735/51649/51805/29093/6714/84303/4711/64949/51081/399512/548596/157378/57380/63875/29074/4696/64960/79135/83858/51021/11222/93058/2010/2820/9016/57143/4713/54460/5025/6150/7381/122704/221496/54539/55486/55210/1353/650…
BP	GO:0006402	mRNA catabolic process	192	-0.399763	-1.82445	2.82389e-06	2.85414e-05	1.67113e-05	6210	tags=41%, list=25%, signal=31%	7356/23644/59284/201626/23589/23369/23016/55795/5436/6741/56829/339345/27257/57055/51690/8148/23019/60493/9641/1618/65110/5578/9261/4292/114609/4343/23658/22803/2332/22916/79675/221662/6499/9775/3304/54542/4848/6832/131405/56915/10921/51010/91875/57472/51154/399664/9704/8570/55095/4116/54512/8087/65109/9238/23404/328/23367/26019/10642/7186/22794/79072/8241/56339/3182/90806/4849/4686/57819/9887/54…
BP	GO:0065004	protein-DNA complex assembly	109	-0.458438	-1.94351	2.83214e-06	2.85878e-05	1.67385e-05	4960	tags=43%, list=20%, signal=35%	9014/26054/3148/6883/83743/55011/6884/5706/144108/6878/50809/23421/6908/4676/6873/55839/51053/55832/55290/64754/4678/6877/1616/23126/5889/6874/7343/6598/2491/10036/401541/6597/54108/8208/23234/11339/54107/3070/9735/81620/64105/1062/1063/4171/1058/55723/55355
BP	GO:0060348	bone development	205	0.352959	1.80363	2.87222e-06	2.89551e-05	1.69536e-05	3221	tags=28%, list=13%, signal=25%	1893/2022/654/5734/5915/7048/249/9060/22856/633/659/51119/3815/7043/7305/56034/51141/6137/3214/2690/10370/5048/2737/7704/25987/202151/8313/202018/9104/10234/59341/29887/8600/55790/3953/309/9249/10507/4665/860/6716/6715/8642/2697/5447/2296/5788/2121/55294/4208/11214/55959/10019/79705/54796/3037/3479/5636
MF	GO:0016209	antioxidant activity	73	0.488357	2.09679	2.90835e-06	2.92816e-05	1.71447e-05	3274	tags=36%, list=13%, signal=31%	5743/1193/3040/3043/114757/7837/4056/2950/2878/64359/847/2946/6280/2954/6649/3047/4353/3048/2745/241/3240/9446/337/5742/10935/2880
BP	GO:0000077	DNA damage checkpoint signaling	97	-0.478835	-2.00188	3.00137e-06	3.01794e-05	1.76704e-05	6343	tags=51%, list=25%, signal=38%	2074/26270/7157/1026/6118/57646/545/79184/5514/5884/51720/8091/26272/261726/51343/80198/11200/10116/56658/4193/7158/9984/27339/79968/1017/4436/54962/83990/80279/9656/8563/11073/5883/25896/57551/84126/55159/1386/146956/29980/5591/51514/60561/835/672/1111/51512/2177/641
BP	GO:0042572	retinol metabolic process	47	0.561596	2.22486	3.1517e-06	3.16503e-05	1.85316e-05	5723	tags=62%, list=23%, signal=48%	9227/125/1544/5959/220/127/1576/124/54884/10170/8608/130/1558/126/1565/9249/1543/8228/216/151056/1551/57104/1562/57665/5950/3991/10901/231/51109
BP	GO:0006911	phagocytosis, engulfment	51	0.558603	2.2466	3.20254e-06	3.21197e-05	1.88065e-05	4696	tags=47%, list=19%, signal=38%	8685/11314/3543/5880/199/7057/4481/64581/2934/948/9938/5336/11031/2213/3689/114786/1793/1182/391/3684/51454/286046/2209/3071
BP	GO:0001655	urogenital system development	331	0.307284	1.6684	3.20682e-06	3.21215e-05	1.88075e-05	4227	tags=30%, list=17%, signal=25%	6422/4091/7010/5156/654/4092/6943/1910/185/3399/10409/2294/3764/5915/9510/4070/8826/2099/639/4609/4774/301/2650/28514/80310/79659/9353/1592/8842/1285/2736/4824/8837/596/1286/847/2737/2625/1027/4311/7704/4313/10413/2028/5311/120892/9104/3400/5728/445/10252/1028/384/123016/2674/255743/3913/5176/7481/25976/5175/8692/55083/6715/8516/5087/1958/8642/30812/2296/55840/8829/168667/284541/4208/26508/55959/…
BP	GO:0051701	biological process involved in interaction with host	172	0.368693	1.83739	3.22246e-06	3.2237e-05	1.88751e-05	3436	tags=30%, list=14%, signal=26%	339390/1949/8547/558/920/4684/10332/9023/1378/6614/10346/185/30835/1604/8519/975/942/2219/4061/1969/2621/2934/7852/972/8993/1508/6504/5359/325/3434/8692/2060/9525/6554/6404/3949/8829/91392/81603/6575/6520/3643/7113/6609/51510/79720/941/59272/9218/3690/55207/27183
BP	GO:1903027	regulation of opsonization	10	0.866243	2.23042	3.23697e-06	3.23408e-05	1.89359e-05	1989	tags=80%, list=8%, signal=74%	10584/78989/8547/2220/5322/2219/4153/722
BP	GO:0003158	endothelium development	113	0.422331	1.99005	3.27232e-06	3.26523e-05	1.91183e-05	4073	tags=34%, list=16%, signal=28%	5138/2658/55273/654/84913/1910/3397/388/94/7132/30061/2947/4615/659/1003/26051/10855/3553/5144/7075/28514/7852/25932/91663/2701/3084/7122/5175/8829/11167/10411/54538/5962/7124/3215/2116/54345/3551
BP	GO:0070227	lymphocyte apoptotic process	72	0.4876	2.09046	3.29002e-06	3.27872e-05	1.91973e-05	3299	tags=42%, list=13%, signal=36%	155038/81704/695/6352/1831/3575/84941/3091/356/939/355/1178/2737/972/640/5728/6194/384/11035/29124/4067/5588/207/6482/3958/604/55716/171558/27242/3559
BP	GO:0061045	negative regulation of wound healing	67	0.50773	2.15506	3.3146e-06	3.29759e-05	1.93078e-05	4521	tags=46%, list=18%, signal=38%	5156/114897/22915/1398/7056/710/90102/4846/7057/5627/58189/2160/1906/5728/240/5327/325/18/5340/3818/58529/10019/54361/2811/1361/7124/55966/2244/928/6558/2247
BP	GO:0007144	female meiosis I	10	-0.877919	-2.13793	3.31738e-06	3.29759e-05	1.93078e-05	988	tags=70%, list=4%, signal=67%	11077/10403/26271/9319/994/6790/9133
MF	GO:0042605	peptide antigen binding	25	0.689657	2.37742	3.36008e-06	3.3358e-05	1.95315e-05	2101	tags=48%, list=8%, signal=44%	10332/30835/23428/3133/3125/3106/3115/3136/3113/3122/3134/3117
BP	GO:0019884	antigen processing and presentation of exogenous antigen	43	0.572262	2.24974	3.39407e-06	3.36528e-05	1.97041e-05	4793	tags=58%, list=19%, signal=47%	912/5641/1520/2207/567/3133/3125/972/3115/3113/50856/2213/3122/3134/3111/3117/3109/3126/7189/3119/911/3551/3108/3112/8722
CC	GO:0022624	proteasome accessory complex	23	-0.724169	-2.23579	3.40908e-06	3.37395e-05	1.97549e-05	6336	tags=83%, list=25%, signal=62%	5720/5721/5718/5700/5714/5704/5706/5717/10213/5715/5719/11047/5709/5702/5701/10197/5708/5707/5710
BP	GO:0000018	regulation of DNA recombination	93	-0.483767	-2.00628	3.41299e-06	3.37395e-05	1.97549e-05	4022	tags=39%, list=16%, signal=33%	64110/4292/51750/55929/10856/29072/60/6830/54799/51010/7158/9984/10459/7037/10902/4436/2956/86/9400/23126/2187/7292/5932/8607/63979/56893/8295/3838/6944/142/1111/10635/641/8914/22976/10721
BP	GO:0090305	nucleic acid phosphodiester bond hydrolysis	184	-0.396196	-1.79729	3.41573e-06	3.37395e-05	1.97549e-05	4489	tags=43%, list=18%, signal=36%	10775/23644/79042/11284/122665/27340/201626/23016/64858/79707/2068/5438/5511/84083/10111/5426/10799/2072/23019/9937/8091/7486/10607/22803/6227/23212/1763/22916/29777/54840/81608/9797/65095/80746/9790/115752/51728/4848/348654/56915/51010/29894/10940/55124/57472/64421/23246/54512/4968/23357/79703/5395/10248/23404/81887/11052/27301/328/1653/246243/5883/5932/2071/79897/90806/4686/51692/55247/80153/27…
BP	GO:1901343	negative regulation of vasculature development	87	0.460814	2.07791	3.43137e-06	3.38513e-05	1.98204e-05	4307	tags=36%, list=17%, signal=30%	2658/7010/1634/10253/11126/11117/9314/9510/23166/10365/7057/7075/729230/1969/356/1285/240/7122/5176/64218/2296/5797/6678/54361/7124/4204/1647/5140/57556/7058/6558
BP	GO:0006809	nitric oxide biosynthetic process	64	0.515906	2.1741	3.44173e-06	3.38998e-05	1.98488e-05	3704	tags=45%, list=15%, signal=39%	5743/5740/3043/9314/199/10365/4846/7099/3553/64581/948/1906/3717/6095/2643/5311/961/9104/445/1191/384/140885/207/3643/2185/10333/7124/64902/706
BP	GO:0030183	B cell differentiation	136	0.395258	1.91647	3.44495e-06	3.38998e-05	1.98488e-05	3504	tags=34%, list=14%, signal=29%	6422/1378/695/677/3815/112616/678/28514/3398/10673/939/3394/4066/596/3635/6688/2322/5336/55619/472/139818/5450/959/4242/2213/973/3445/7412/1316/3569/115352/3565/6482/5788/604/9734/10892/3676/6850/974/2185/22806/54106/3574/7528/3456
BP	GO:0010518	positive regulation of phospholipase activity	51	0.557078	2.24046	3.45079e-06	3.39147e-05	1.98575e-05	5704	tags=59%, list=23%, signal=46%	5156/64805/5322/185/942/1902/6352/148/3357/2099/728/3702/3815/7294/5330/6401/10316/5031/10672/2769/5724/11331/2247/283/2260/552/1909/5159/5741/9290
BP	GO:0006271	DNA strand elongation involved in DNA replication	14	-0.804507	-2.19413	3.49402e-06	3.42666e-05	2.00635e-05	3500	tags=93%, list=14%, signal=80%	5426/1763/5111/10714/3978/5422/3980/5983/54107/4172/5984/4173/4176
BP	GO:0002532	production of molecular mediator involved in inflammatory response	73	0.484027	2.0782	3.49534e-06	3.42666e-05	2.00635e-05	4648	tags=45%, list=18%, signal=37%	63940/695/4615/7099/653361/6774/64581/3091/199713/5023/948/240/8773/923/241/113/5187/4067/115362/3569/140885/3566/11006/347/6850/2048/10333/7124/23765/64170/8723/23646/26060
BP	GO:1903311	regulation of mRNA metabolic process	237	-0.376775	-1.76535	3.50011e-06	3.42704e-05	2.00658e-05	6210	tags=39%, list=25%, signal=30%	7356/3178/59284/201626/23589/23369/23016/55795/10914/5436/5936/56829/26576/79810/339345/55225/27257/57055/8148/6829/55677/23019/60493/9641/1618/23210/5578/9261/4292/114609/4343/2332/55234/22916/79675/221662/904/3312/9775/56254/54542/4848/6830/131405/56915/10921/51010/91875/7072/55796/9810/57472/399664/9704/27339/8570/55095/4116/8087/3297/11338/3191/9238/9584/23404/29890/79171/11052/123169/328/233…
BP	GO:2000181	negative regulation of blood vessel morphogenesis	86	0.461797	2.08165	3.51726e-06	3.43953e-05	2.01389e-05	4307	tags=36%, list=17%, signal=30%	2658/7010/1634/10253/11126/11117/9314/9510/23166/10365/7057/7075/729230/1969/356/1285/240/7122/5176/64218/2296/5797/6678/54361/7124/4204/1647/5140/57556/7058/6558
CC	GO:0030684	preribosome	57	-0.562365	-2.13892	3.54801e-06	3.46528e-05	2.02896e-05	6040	tags=63%, list=24%, signal=48%	27340/23195/55272/25983/54663/2091/10436/10969/51096/10607/51018/23212/23481/90441/79050/10813/10885/6201/65095/92856/9790/51154/23076/23246/9136/55813/153443/705/117246/55127/55759/81887/3692/65083/9277/5591
BP	GO:0032418	lysosome localization	71	0.489203	2.10815	3.62158e-06	3.52834e-05	2.06589e-05	5191	tags=49%, list=21%, signal=39%	11314/3162/2294/695/5880/3815/10125/5293/81565/5294/8832/201294/5729/2268/5730/640/3598/8773/4067/3566/3565/6850/55207/9842/79803/10013/54664/2242/8723/3596/27342/3965/9846/25940/83871
BP	GO:1990849	vacuolar localization	71	0.489203	2.10815	3.62158e-06	3.52834e-05	2.06589e-05	5191	tags=49%, list=21%, signal=39%	11314/3162/2294/695/5880/3815/10125/5293/81565/5294/8832/201294/5729/2268/5730/640/3598/8773/4067/3566/3565/6850/55207/9842/79803/10013/54664/2242/8723/3596/27342/3965/9846/25940/83871
BP	GO:0046890	regulation of lipid biosynthetic process	150	0.379296	1.86009	3.63849e-06	3.54041e-05	2.07295e-05	3704	tags=34%, list=15%, signal=29%	654/83643/133/653/5743/5166/10580/3357/3553/3490/301/9971/27122/51141/1389/10613/7069/5105/8720/23411/972/37/6615/9104/2170/345275/376497/10464/11160/207/57406/1958/33/5447/3949/55294/6591/337/4790/2672/54361/6720/7376/335/7124/23410/50846/23038/23541/1081/706
BP	GO:0022898	regulation of transmembrane transporter activity	228	0.341708	1.77596	3.65542e-06	3.55247e-05	2.08001e-05	4177	tags=31%, list=17%, signal=26%	1393/53826/51185/5621/1193/288/2273/5142/6347/1520/6324/5144/2040/5649/2669/7881/6844/1080/729230/3270/126306/3306/1906/596/6622/2946/28954/65018/5311/9104/5336/54800/2745/477/5031/3753/2056/5348/287/148811/9446/30845/6330/2258/79026/6548/53827/54413/482/1394/154/6236/4208/2048/1742/2185/1612/59272/54106/781/23171/5724/11331/10142/5292/6786/57555/57120/351/57520
BP	GO:0050856	regulation of T cell receptor signaling pathway	40	0.598988	2.32087	3.69691e-06	3.58834e-05	2.10102e-05	4161	tags=50%, list=17%, signal=42%	11314/11126/5621/1997/975/79037/26191/10666/4068/50852/7805/84174/3932/3958/11006/56940/10892/1236/53347/84433
MF	GO:0008395	steroid hydroxylase activity	36	0.620958	2.32886	3.72081e-06	3.60707e-05	2.11198e-05	4042	tags=53%, list=16%, signal=44%	1571/9023/113612/51302/1544/1576/1559/1555/1549/1558/1582/1565/1543/1593/64816/1548/1551/1573/1562
BP	GO:0071772	response to BMP	158	0.378729	1.85988	3.76444e-06	3.64035e-05	2.13147e-05	3151	tags=27%, list=13%, signal=23%	2658/55273/6422/4091/2022/654/4092/653/94/7049/659/1003/51232/7043/92/2627/8321/4093/8646/7323/10272/6653/2625/285704/6425/64388/4920/140628/79176/10653/57045/860/1958/5654/11167/283375/168667/9958/26508/57057/494470/5046
BP	GO:0071773	cellular response to BMP stimulus	158	0.378729	1.85988	3.76444e-06	3.64035e-05	2.13147e-05	3151	tags=27%, list=13%, signal=23%	2658/55273/6422/4091/2022/654/4092/653/94/7049/659/1003/51232/7043/92/2627/8321/4093/8646/7323/10272/6653/2625/285704/6425/64388/4920/140628/79176/10653/57045/860/1958/5654/11167/283375/168667/9958/26508/57057/494470/5046
BP	GO:0008228	opsonization	16	0.788521	2.34567	3.86594e-06	3.72755e-05	2.18252e-05	1989	tags=50%, list=8%, signal=46%	10584/78989/8547/2220/5322/2219/4153/722
BP	GO:0060419	heart growth	73	0.48308	2.07413	3.86888e-06	3.72755e-05	2.18252e-05	4614	tags=47%, list=18%, signal=38%	10409/23414/7048/148/7049/57817/2627/60485/5999/26281/10370/1906/5997/10413/1848/5728/7472/8470/6909/2296/10611/221476/4208/11214/57057/3479/7528/32/5292/7490/657/9241/2247/5950
BP	GO:0008360	regulation of cell shape	131	0.401156	1.92777	3.86504e-06	3.72755e-05	2.18252e-05	3395	tags=32%, list=13%, signal=28%	1436/55843/23136/390/4651/388/2534/1398/7940/1902/5880/6347/6369/3815/3055/301/221472/2059/10979/148170/10602/114793/10435/2268/11151/4628/57381/89846/55742/3689/56990/10672/10507/64218/6348/752/51177/23191/391/2185/5962/152273
BP	GO:0002224	toll-like receptor signaling pathway	110	0.430218	2.01328	3.88008e-06	3.73374e-05	2.18615e-05	3377	tags=35%, list=13%, signal=31%	11314/11027/11213/695/4615/2099/1520/7099/26191/1654/929/7098/7096/9971/7097/51311/948/3662/57142/9867/91543/5336/64922/3665/23643/1535/4938/4067/23151/84868/115352/118788/3659/23547/7189/2672/10333/54106/7124
BP	GO:0042100	B cell proliferation	94	0.448783	2.03139	3.89832e-06	3.74669e-05	2.19373e-05	3504	tags=35%, list=14%, signal=30%	11314/695/975/7099/10125/3575/7305/23495/10673/596/3635/972/952/640/472/959/2213/973/4067/3445/10451/115352/3565/5788/604/4064/4208/2048/22806/27242/54106/3574/3456
BP	GO:0048662	negative regulation of smooth muscle cell proliferation	49	0.563422	2.253	3.91327e-06	3.75645e-05	2.19945e-05	5840	tags=55%, list=23%, signal=42%	3486/3162/57447/199/659/4846/7043/30008/5739/1027/3600/5728/3488/10672/4969/4208/347/4883/59272/3593/10891/283/93649/27250/7128/1264/65009
BP	GO:0033260	nuclear DNA replication	32	-0.654912	-2.1743	3.94497e-06	3.78224e-05	2.21455e-05	4136	tags=62%, list=16%, signal=52%	7486/51750/80174/1763/5111/51053/54962/10269/3978/8317/5422/29980/64785/4175/81620/4172/2237/4173/641/4171
CC	GO:0043596	nuclear replication fork	25	-0.703384	-2.22104	3.96606e-06	3.79318e-05	2.22096e-05	2544	tags=60%, list=10%, signal=54%	5111/83637/6119/50485/54962/10714/11169/9031/5422/55388/5557/5424/23649/4172/8914
BP	GO:0007259	receptor signaling pathway via JAK-STAT	157	0.382905	1.88784	3.96587e-06	3.79318e-05	2.22096e-05	4981	tags=38%, list=20%, signal=31%	11314/3587/1436/2534/3059/7132/9021/6352/8835/57817/6347/3815/3575/6774/729230/3572/2690/3717/6775/3600/5311/2149/2322/2056/10464/3716/4067/3445/3569/3565/5788/6778/1489/10019/2048/2185/3263/3479/3455/7124/54741/3593/3456/1647/132299/3588/4485/51379/3280/3454/857/5789/388646/3596/22876/1437/1600/6777/54940/6773
BP	GO:0007249	I-kappaB kinase/NF-kappaB signaling	257	0.326135	1.71686	4.04675e-06	3.86564e-05	2.26338e-05	3468	tags=26%, list=14%, signal=22%	1893/920/1910/10346/3162/2534/57161/695/57153/7132/54386/1902/6283/3357/4615/2099/7099/3553/6366/6363/834/7098/2950/64581/9971/7097/356/51311/5966/948/1906/26057/6095/8837/23411/972/65018/8795/1491/2149/5336/11040/24138/684/28512/64343/8600/5187/11035/140885/207/2697/11006/81603/245937/11214/10892/10133/7189/9218/10333/54106/7124/284/9100/56674
BP	GO:0006576	cellular biogenic amine metabolic process	94	0.447646	2.02624	4.06904e-06	3.88219e-05	2.27307e-05	3594	tags=33%, list=14%, signal=28%	1621/9464/4837/2639/4061/5153/217/2034/6303/112483/7054/27284/3067/6999/2643/2625/6622/1312/3176/8564/29958/4129/3689/4929/285671/18/26002/6799/3684/4204/8942
CC	GO:0000313	organellar ribosome	76	-0.511449	-2.07425	4.12033e-06	3.92157e-05	2.29613e-05	6171	tags=59%, list=25%, signal=45%	92170/9553/51073/116540/65993/54534/51318/28977/64979/23107/51650/51258/29093/64949/51081/63875/29074/64960/51021/11222/387338/63899/54460/6150/122704/65003/64965/28998/64951/64963/55168/64969/51264/65005/740/10573/79590/6182/55173/51373/64928/6183/51253/128308/7818
CC	GO:0005761	mitochondrial ribosome	76	-0.511449	-2.07425	4.12033e-06	3.92157e-05	2.29613e-05	6171	tags=59%, list=25%, signal=45%	92170/9553/51073/116540/65993/54534/51318/28977/64979/23107/51650/51258/29093/64949/51081/63875/29074/64960/51021/11222/387338/63899/54460/6150/122704/65003/64965/28998/64951/64963/55168/64969/51264/65005/740/10573/79590/6182/55173/51373/64928/6183/51253/128308/7818
BP	GO:0031098	stress-activated protein kinase signaling cascade	225	0.337512	1.74788	4.20244e-06	3.99486e-05	2.33904e-05	4102	tags=33%, list=16%, signal=28%	6422/9464/2308/5734/85458/3489/4616/3082/7538/677/4615/7099/26191/4609/5602/3553/6366/6363/10125/51339/653361/7098/2950/64581/9611/148170/10550/51562/939/9770/355/5609/5048/80824/3476/65018/7164/120892/4281/6688/4920/9867/6386/10912/9459/11342/59341/6504/6416/8600/11184/5187/2213/23328/4067/140885/1540/56940/7189/5604/4790/2185/54106/7124/1843/1647/5606/8324/57630/64170/1410/1236/3551/2047/351
BP	GO:0045446	endothelial cell differentiation	97	0.445069	2.04311	4.31026e-06	4.09239e-05	2.39615e-05	4073	tags=36%, list=16%, signal=30%	5138/2658/55273/654/84913/1910/3397/94/7132/2947/4615/659/1003/26051/10855/3553/5144/7075/28514/7852/25932/91663/3084/7122/5175/8829/11167/10411/54538/5962/7124/3215/2116/54345/3551
BP	GO:0006775	fat-soluble vitamin metabolic process	42	0.587276	2.28804	4.37404e-06	4.14793e-05	2.42866e-05	3377	tags=43%, list=13%, signal=37%	9227/5947/5360/5641/8074/54657/1576/8529/1592/6615/54659/1543/1593/66002/6591/4790/2672/7124
BP	GO:0097696	receptor signaling pathway via STAT	164	0.371166	1.82678	4.38953e-06	4.15758e-05	2.43431e-05	4981	tags=37%, list=20%, signal=30%	11314/3587/1436/2534/3059/7132/9021/6352/8835/57817/6347/3815/3575/6774/729230/3572/2690/3717/6775/3600/5311/2149/2322/2056/10464/3716/4067/3445/3569/3565/5788/6778/1489/10019/2048/2185/3263/3479/3455/7124/54741/3593/3456/1647/132299/3588/4485/51379/3280/3454/857/5789/388646/3596/22876/1437/1600/6777/54940/6773
BP	GO:0032543	mitochondrial translation	58	-0.542106	-2.07159	4.50542e-06	4.26219e-05	2.49557e-05	3964	tags=45%, list=16%, signal=38%	51335/51081/10102/64960/285367/7284/51021/283459/63899/54460/6150/64951/55699/23395/85476/64963/55168/124454/51373/80222/10128/6183/79072/4528/51654/55157
MF	GO:0003953	NAD+ nucleosidase activity	28	0.673649	2.37496	4.55434e-06	4.29265e-05	2.5134e-05	3332	tags=57%, list=13%, signal=50%	8809/9173/3554/8807/4615/59307/7099/7098/7096/7097/51311/952/118788/10333/3556/54106
BP	GO:0055021	regulation of cardiac muscle tissue growth	50	0.549023	2.18694	4.55954e-06	4.29265e-05	2.5134e-05	4614	tags=50%, list=18%, signal=41%	23414/7048/7049/57817/2627/60485/5999/26281/10370/1906/5997/10413/5728/7472/6909/221476/4208/57057/3479/7528/5292/657/9241/2247/5950
BP	GO:0034501	protein localization to kinetochore	13	-0.821324	-2.16891	4.5576e-06	4.29265e-05	2.5134e-05	2017	tags=77%, list=8%, signal=71%	55920/55166/9183/10403/27085/55055/9735/81620/9212/7272
BP	GO:1903083	protein localization to condensed chromosome	13	-0.821324	-2.16891	4.5576e-06	4.29265e-05	2.5134e-05	2017	tags=77%, list=8%, signal=71%	55920/55166/9183/10403/27085/55055/9735/81620/9212/7272
BP	GO:0003176	aortic valve development	37	0.591895	2.2342	4.58833e-06	4.31457e-05	2.52623e-05	2939	tags=46%, list=12%, signal=41%	4091/11117/7133/7132/659/4846/7075/9353/2625/6615/4772/140628/6591/5925/26508/6586/57057
BP	GO:0045621	positive regulation of lymphocyte differentiation	101	0.43803	2.02104	4.62892e-06	4.34409e-05	2.54352e-05	3448	tags=38%, list=14%, signal=33%	558/10288/1378/695/7048/3142/942/864/114548/6363/10125/3575/301/2621/939/3594/2736/5105/2737/2625/3635/972/7704/7535/3600/3122/3707/3566/3565/5788/604/11006/10892/6850/941/3559/3593/3574
BP	GO:0048872	homeostasis of number of cells	251	0.325662	1.70553	4.63081e-06	4.34409e-05	2.54352e-05	2796	tags=27%, list=11%, signal=24%	558/3162/2113/3059/7538/30061/677/7049/5142/10365/1831/57817/10461/4846/212/3815/5293/9935/211/3575/92/608/567/6774/301/2034/3091/51309/3398/729230/6372/23495/10673/9770/10370/3717/355/51705/596/80177/2625/3635/972/11151/2149/6688/2322/6194/55619/3988/64922/139818/1021/2056/11035/3707/54700/4067/3569/207/83700/10320/604/11167/5926/4208/5925
BP	GO:0060393	regulation of pathway-restricted SMAD protein phosphorylation	60	0.516716	2.16671	4.68313e-06	4.38792e-05	2.56918e-05	2108	tags=28%, list=8%, signal=26%	2658/4091/2022/654/4092/653/11117/94/7048/659/7043/92/4035/11030/83891/6386/57045
BP	GO:0090330	regulation of platelet aggregation	25	0.684164	2.35849	4.81123e-06	4.50256e-05	2.6363e-05	2994	tags=48%, list=12%, signal=42%	114897/22915/1511/3572/3717/640/4067/5588/3569/18/6850/10019
BP	GO:0048708	astrocyte differentiation	74	0.488766	2.11366	4.82269e-06	4.50789e-05	2.63942e-05	4836	tags=45%, list=19%, signal=36%	2358/10319/712/6279/728/7099/3459/3553/4035/6774/28514/3398/3572/7431/6280/4920/3400/135/1021/3913/3569/30812/3949/5604/3845/7124/5663/351/3280/177/9241/6886/1600
BP	GO:0051403	stress-activated MAPK cascade	220	0.337306	1.74243	4.84279e-06	4.52128e-05	2.64727e-05	4102	tags=33%, list=16%, signal=28%	6422/9464/2308/5734/85458/3489/4616/3082/7538/677/4615/7099/26191/4609/5602/3553/6366/6363/10125/51339/653361/7098/2950/64581/9611/148170/10550/51562/939/9770/355/5609/5048/80824/3476/65018/7164/120892/4281/6688/4920/9867/6386/10912/9459/59341/6504/6416/8600/11184/5187/2213/23328/140885/1540/56940/7189/5604/4790/2185/54106/7124/1843/1647/5606/8324/57630/64170/1410/1236/3551/2047/351
BP	GO:0001510	RNA methylation	48	-0.576186	-2.12	4.87651e-06	4.54735e-05	2.66253e-05	5239	tags=56%, list=21%, signal=45%	79922/2091/11180/24140/10436/55621/79872/29081/387338/9836/63899/339175/55798/56257/8731/55039/144233/4234/117246/29890/64863/127253/55695/84705/56339/10785/6894
BP	GO:0045471	response to ethanol	116	0.412054	1.9472	4.90666e-06	4.57002e-05	2.6758e-05	3377	tags=29%, list=13%, signal=25%	1393/1621/6915/6916/1571/2534/6279/57817/929/4609/54658/9962/1536/2059/4255/939/5999/7054/847/2625/5997/595/130/4129/7122/113/1036/761/7412/6554/18/2185/6720/7124
CC	GO:0098562	cytoplasmic side of membrane	173	0.36131	1.80053	5.0898e-06	4.73496e-05	2.77238e-05	4661	tags=38%, list=19%, signal=31%	9630/5239/6503/2534/2791/2775/54331/8826/26191/3815/3055/2669/7881/6234/10979/85397/7054/5996/2268/7535/5997/5311/120892/640/5728/5530/914/9495/2773/10672/4067/94235/3932/30820/207/5788/1540/57664/11006/54206/6235/2769/6850/7189/55970/1742/2185/55763/3845/346562/55966/59345/22821/2771/7803/3551/2242/6521/2788/7525/7074/6769/5775/1915/5868/6277
BP	GO:0006457	protein folding	177	-0.392103	-1.77779	5.11739e-06	4.75498e-05	2.7841e-05	6021	tags=45%, list=24%, signal=35%	3300/9360/7466/811/10131/8468/4879/10598/134218/150353/3308/7184/3313/11328/1047/4878/3320/6388/51364/10694/821/7266/9601/64714/3309/10856/3301/2280/728489/79087/1676/5611/10049/3315/27433/3312/3304/10574/5824/6902/10130/131474/55898/9141/23640/23386/10576/10808/5034/10726/4802/10465/1457/7265/2288/22948/7411/908/3329/79031/664618/10575/81562/51182/23759/27348/80331/51645/6904/3326/134266/169714/…
MF	GO:0023023	MHC protein complex binding	34	0.635404	2.35646	5.16884e-06	4.7971e-05	2.80876e-05	2770	tags=56%, list=11%, signal=50%	10288/920/11126/3824/975/925/567/3822/3125/972/3821/3115/3113/3122/3111/3117/311/3109/3126
BP	GO:0002468	dendritic cell antigen processing and presentation	15	0.802441	2.33525	5.20737e-06	4.82317e-05	2.82402e-05	4014	tags=80%, list=16%, signal=67%	10875/7057/6366/6363/3125/968/972/50856/2213/3122/6556/1236
CC	GO:0009898	cytoplasmic side of plasma membrane	154	0.377447	1.86597	5.20924e-06	4.82317e-05	2.82402e-05	4661	tags=39%, list=19%, signal=32%	9630/5239/6503/2534/2791/2775/54331/8826/26191/3815/3055/2669/7881/10979/85397/7054/5996/2268/7535/5997/640/5728/5530/914/9495/2773/10672/4067/94235/3932/30820/207/5788/1540/57664/11006/54206/2769/6850/7189/55970/1742/2185/55763/3845/346562/55966/59345/22821/2771/7803/3551/2242/6521/2788/7525/7074/6769/5775/6277
BP	GO:0030261	chromosome condensation	31	-0.650615	-2.14274	5.34143e-06	4.93972e-05	2.89226e-05	4294	tags=52%, list=17%, signal=43%	26993/58531/8091/22985/23310/8815/9031/29781/9918/10592/54892/64151/10051/51203/7153/113130
BP	GO:0006303	double-strand break repair via nonhomologous end joining	48	-0.574022	-2.11204	5.40946e-06	4.99085e-05	2.9222e-05	6343	tags=60%, list=25%, signal=45%	2074/11284/64858/84309/3148/2547/2072/25913/9937/8091/4292/10213/7913/27434/9025/64421/7158/10459/27339/50485/3297/51547/7515/1161/5422/3980/5591/24144/10721
BP	GO:0048762	mesenchymal cell differentiation	220	0.336463	1.73808	5.4031e-06	4.99085e-05	2.9222e-05	3200	tags=26%, list=13%, signal=23%	55273/6422/10439/2022/4092/6943/9464/10253/653/1910/8320/3082/7048/147906/3357/7049/90102/3553/7043/2042/80709/3091/10979/10370/1906/596/2625/57142/202151/6615/140628/6386/8313/202018/5728/7472/3084/10252/309/7481/10507/6899/3569/64218/30812/2296/84695/8829/4208/6591/26508/57057/80139/54361/2487/2255/3037
BP	GO:0046620	regulation of organ growth	83	0.463467	2.06397	5.44791e-06	5.02041e-05	2.93951e-05	4627	tags=46%, list=18%, signal=37%	10409/2395/23414/7048/3142/7049/57817/2627/60485/26524/5999/26281/10370/1906/5997/10413/1848/5728/7472/6909/207/2296/221476/4208/57057/3479/3574/7528/32/1081/5292/7490/657/27230/9241/2247/5950/9113
BP	GO:0050886	endocrine process	82	0.47193	2.08671	5.57266e-06	5.12933e-05	3.00329e-05	3676	tags=30%, list=15%, signal=26%	1393/114897/654/1910/185/1511/4846/51762/3553/1359/1906/4824/2625/2028/6196/2149/5443/1535/55503/2697/1394/3845/59272/1408/1081
MF	GO:0042379	chemokine receptor binding	61	0.508419	2.13988	5.60355e-06	5.15171e-05	3.01639e-05	2590	tags=30%, list=10%, signal=27%	6387/6368/6359/9547/6352/6347/6369/6366/6363/729230/6372/388372/2920/414062/58191/3716/6349/6348
BP	GO:0046633	alpha-beta T cell proliferation	35	0.60896	2.27311	5.61639e-06	5.15746e-05	3.01976e-05	5221	tags=66%, list=21%, signal=52%	10148/1604/975/7048/26191/1794/3133/729230/3717/7535/3600/916/384/57045/5788/3659/6850/3593/57630/940/3965/29126/868
BP	GO:0032689	negative regulation of interferon-gamma production	35	0.608738	2.27228	5.70771e-06	5.23518e-05	3.06526e-05	2662	tags=43%, list=11%, signal=38%	558/5621/9173/1378/7099/9971/2621/10225/80380/2625/8993/6504/7805/84868/11006
BP	GO:0072329	monocarboxylic acid catabolic process	112	0.41075	1.9413	5.71931e-06	5.23969e-05	3.0679e-05	5601	tags=45%, list=22%, signal=35%	2639/23417/56898/8529/1592/84693/5105/2110/37/84129/197257/3712/10449/549/30/207/55862/33/3033/83752/54363/35/1376/66002/1962/64902/51390/32/5095/1666/34/5106/38/5826/3032/1579/6718/2184/6822/8647/6342/23600/55268/10999/2108/4051/55289/5264/5446/11001
BP	GO:0002040	sprouting angiogenesis	110	0.424961	1.98868	5.77698e-06	5.28634e-05	3.09522e-05	3421	tags=33%, list=14%, signal=28%	84870/7010/6915/5743/3162/185/147372/8434/9314/94/4804/10365/7057/26051/301/28514/1969/9353/3164/161198/63923/240/57381/55742/7424/3716/207/8829/168667/55294/9734/2752/27286/2185/284/3593
BP	GO:1902969	mitotic DNA replication	12	-0.827543	-2.14427	5.86327e-06	5.35904e-05	3.13778e-05	1217	tags=67%, list=5%, signal=63%	10269/3978/5422/64785/4175/4172/4173/4171
BP	GO:0034440	lipid oxidation	105	0.420084	1.95875	5.8877e-06	5.3751e-05	3.14719e-05	6117	tags=49%, list=24%, signal=37%	114757/5166/2639/127/23417/56898/8529/2110/128/37/84129/2170/240/3712/10449/549/30/207/55862/33/5447/3033/83752/54363/35/1376/1962/51179/347/285440/32/1666/34/38/79602/10891/5826/3032/8647/6342/23600/55268/2108/55289/5264/51422/11001/8013/51/1892/5825
BP	GO:0001779	natural killer cell differentiation	23	0.706695	2.38605	5.9436e-06	5.41981e-05	3.17337e-05	2495	tags=52%, list=10%, signal=47%	558/10461/639/10125/5293/2621/4783/8993/3600/6504/5087/5788
MF	GO:0008173	RNA methyltransferase activity	36	-0.624157	-2.14742	6.03851e-06	5.49996e-05	3.22029e-05	5239	tags=64%, list=21%, signal=51%	79922/2091/24140/10436/55621/29081/387338/9836/63899/339175/55798/56257/8731/55039/144233/4234/117246/64863/127253/55695/56339/10785/6894
BP	GO:0030258	lipid modification	190	0.35838	1.82241	6.08179e-06	5.53295e-05	3.23961e-05	4785	tags=36%, list=19%, signal=30%	1571/185/114757/5166/2639/3931/9107/127/1576/23417/56898/8529/2110/3635/128/37/8867/84129/5728/2170/240/1558/3712/10449/549/22908/30/1543/207/55862/1606/33/5447/3033/83752/54363/2053/35/284541/1376/1962/51179/347/337/66036/8821/285440/81537/335/32/3633/1551/1666/34/93492/26301/55613/38/79602/10891/5826/3032/6484/116519/8647/6342/22876/23600/55268
BP	GO:0034112	positive regulation of homotypic cell-cell adhesion	14	0.805744	2.27057	6.12937e-06	5.56976e-05	3.26116e-05	2273	tags=64%, list=9%, signal=59%	22915/288/1511/6352/3572/3717/8600/3716/3569
MF	GO:0008017	microtubule binding	215	-0.377655	-1.75572	6.14207e-06	5.57483e-05	3.26413e-05	3844	tags=28%, list=15%, signal=24%	4741/9857/1641/2332/51199/1069/23046/3799/11104/2801/4733/4134/9576/90990/10297/10300/56890/55920/23291/27436/9448/4968/3796/4976/4133/1639/27229/7756/10128/84722/8480/9371/283431/7840/146909/55342/10615/81930/347240/81624/55755/9793/80346/51512/81610/3832/1062/24137/147841/9493/9928/1063/56992/11004/10112/22974/332/29127/9055/3833/51203
BP	GO:2000116	regulation of cysteine-type endopeptidase activity	205	0.345897	1.76755	6.15012e-06	5.57568e-05	3.26463e-05	4092	tags=33%, list=16%, signal=28%	8530/5743/2152/2534/9314/3082/4804/6279/5641/83595/7057/1654/4609/114548/831/3428/834/27141/64581/960/4255/5023/2621/2934/10550/356/939/55081/3717/1285/355/4824/8837/23411/6622/3476/6280/3164/2149/58484/135/9451/7805/25816/23151/489/3932/207/5447/358/55031/10892/6850/9447/10935/1612/112401/7124/83874/55655/57630/64170/8738/1410/5272/6582/5329
BP	GO:0070302	regulation of stress-activated protein kinase signaling cascade	179	0.355712	1.78155	6.16524e-06	5.58293e-05	3.26887e-05	4503	tags=36%, list=18%, signal=30%	6422/9464/2308/85458/3489/4616/3082/4615/7099/26191/4609/3553/6366/6363/10125/51339/653361/7098/2950/64581/9611/10550/51562/939/9770/355/5609/5048/80824/3476/65018/7164/4281/6688/9867/6386/10912/11342/59341/6504/8600/5187/2213/23328/4067/140885/1540/56940/7189/5604/2185/54106/7124/1843/1647/8324/57630/64170/1236/2047/351/177/142679/4317/4294
MF	GO:0016796	exonuclease activity, active with either ribo- or deoxyribonucleic acids and producing 5'-phosphomonoesters	49	-0.575315	-2.13125	6.18972e-06	5.58573e-05	3.27051e-05	4489	tags=47%, list=18%, signal=39%	5426/23019/9937/22803/54840/115752/4848/56915/51010/57472/64421/54512/23357/23404/27301/328/5883/90806/51692/5424/81875/9156/2237
BP	GO:0006939	smooth muscle contraction	101	0.434134	2.00306	6.18385e-06	5.58573e-05	3.27051e-05	6082	tags=45%, list=24%, signal=34%	6915/5743/1910/148/3357/3815/4638/5023/60675/1906/3778/952/5997/2149/10316/796/477/255743/5020/6909/3363/9732/154/18/55959/151/5724/3352/857/93649/4629/1908/51738/150/6546/1909/323/6338/340481/84193/1264/94103/322/152/624
BP	GO:1905952	regulation of lipid localization	130	0.397484	1.90673	6.18743e-06	5.58573e-05	3.27051e-05	5814	tags=42%, list=23%, signal=32%	114897/654/9227/185/1071/51703/7057/4481/3553/4035/8529/356/948/1906/2180/4824/22925/2170/5443/8600/1582/5020/3569/55754/207/346/1394/337/6850/4790/114885/3690/7376/335/7124/1408/32/10802/706/57104/5244/1579/6754/116519/6342/10062/10938/51738/1149/118471/718/9619/5321/1066
BP	GO:0070527	platelet aggregation	64	0.508216	2.14169	6.28381e-06	5.6641e-05	3.3164e-05	4221	tags=42%, list=17%, signal=35%	5156/114897/64805/22915/3043/1511/375033/5294/3572/3717/5341/640/10077/4067/5588/3569/83706/18/10398/6850/10019/2811/3690/6814/2244/3611/928
BP	GO:1904407	positive regulation of nitric oxide metabolic process	38	0.597564	2.28072	6.39126e-06	5.75434e-05	3.36923e-05	3456	tags=53%, list=14%, signal=45%	5743/3043/9314/199/10365/7099/3553/64581/948/1906/3717/5311/445/1191/207/3643/2185/10333/7124/64902
BP	GO:0060411	cardiac septum morphogenesis	66	0.496457	2.10154	6.44876e-06	5.79944e-05	3.39564e-05	2939	tags=35%, list=12%, signal=31%	4091/2022/4092/653/23414/7048/7049/659/4846/2627/60485/8321/9353/10370/55742/9249/7481/6899/6909/8829/26508/6586/57057
MF	GO:0004842	ubiquitin-protein transferase activity	367	-0.335581	-1.64377	6.51617e-06	5.85335e-05	3.42721e-05	4207	tags=29%, list=17%, signal=25%	9666/9442/10616/11074/23295/26272/23609/147339/25820/7332/54476/55128/23220/5987/389898/140825/117854/127544/79872/10107/9830/64795/378884/6015/23624/10477/55072/55120/10425/90390/10193/148066/10075/56658/51366/4193/80204/9025/23352/56254/55298/54542/113878/117584/131405/26268/391712/7322/7681/26190/81858/9810/26233/81559/9616/27339/51283/7428/23291/81786/9968/10293/26267/727800/6992/84246/10155/…
BP	GO:0043534	blood vessel endothelial cell migration	108	0.427766	1.99892	6.55518e-06	5.88164e-05	3.44377e-05	3609	tags=32%, list=14%, signal=28%	2658/6915/5547/5743/3162/3397/2113/9314/94/4780/4846/1003/7057/301/3091/1969/9353/23411/3164/161198/57381/7424/207/8829/55294/9734/4208/27286/2185/335/7124/284/4204/1647/5606
BP	GO:0000387	spliceosomal snRNP assembly	32	-0.647751	-2.15053	6.5982e-06	5.91346e-05	3.4624e-05	3471	tags=53%, list=14%, signal=46%	24148/6634/27339/6636/26121/25929/10419/9129/6633/79833/6628/57819/6635/8161/6637/6631/25804
BP	GO:1900274	regulation of phospholipase C activity	39	0.583663	2.25544	6.69192e-06	5.98936e-05	3.50684e-05	5970	tags=69%, list=24%, signal=53%	5156/64805/942/1902/148/3357/2099/728/3702/3815/7294/5330/6401/10316/5031/2769/5724/11331/2247/283/2260/552/1909/5159/5741/9290/553
BP	GO:0007179	transforming growth factor beta receptor signaling pathway	178	0.361701	1.8126	6.69818e-06	5.98936e-05	3.50684e-05	3041	tags=26%, list=12%, signal=23%	4091/2022/9719/4092/9839/10253/11117/3397/269/94/8425/7048/7049/2530/65997/1003/7057/2615/7043/2331/2353/6774/10979/26524/27122/4093/10370/23411/83891/9404/6688/6386/10252/1028/7122/255743/57045/3725/64081/8516/5654/2201/58533/56940/9958/80139/22938
MF	GO:0004252	serine-type endopeptidase activity	144	0.377444	1.84128	6.84811e-06	6.11644e-05	3.58125e-05	4890	tags=34%, list=19%, signal=28%	1675/922/3003/2152/715/1511/51279/3001/716/1520/3426/3083/3002/11098/2999/2160/11012/8720/4327/2158/5648/4313/7177/649/2159/10747/5327/3240/8858/83752/5654/4316/7092/4018/5340/3818/7113/5046/3004/566/3250/4319/1075/4317/5652/43849/9622/9407/4057
BP	GO:0007160	cell-matrix adhesion	215	0.340139	1.75459	7.15695e-06	6.38501e-05	3.7385e-05	5106	tags=36%, list=20%, signal=29%	10894/3680/10516/6422/7010/11093/11117/6614/9748/8631/22998/94/10580/2824/1842/11170/90102/7057/10855/6366/2042/960/59339/10979/30008/54453/10225/948/3681/596/64098/63923/5728/6237/916/1021/255743/3689/7412/5295/8516/83700/83706/604/8829/967/6548/56940/347/3676/2185/1308/54361/7007/3690/3684/55966/27329/2244/146183/1305/1236/3611/4680/10391/87/7074/3987/22795/3695/7414/9358/8754/1307/8861/7059/683
BP	GO:0010039	response to iron ion	29	0.644485	2.27791	7.17266e-06	6.39175e-05	3.74244e-05	2752	tags=52%, list=11%, signal=46%	654/3162/2395/79901/30061/57817/567/3091/596/9474/6622/595/84557/1543/18
MF	GO:0035064	methylated histone binding	64	-0.53299	-2.08912	7.31898e-06	6.49995e-05	3.8058e-05	3969	tags=44%, list=16%, signal=37%	2186/2332/23613/80764/139886/23170/10927/23310/54799/30827/7158/8535/222229/57680/169981/26147/83746/84733/2956/11091/23468/5929/26009/11335/11137/23512/29128/54892
MF	GO:0140034	methylation-dependent protein binding	64	-0.53299	-2.08912	7.31898e-06	6.49995e-05	3.8058e-05	3969	tags=44%, list=16%, signal=37%	2186/2332/23613/80764/139886/23170/10927/23310/54799/30827/7158/8535/222229/57680/169981/26147/83746/84733/2956/11091/23468/5929/26009/11335/11137/23512/29128/54892
MF	GO:0005178	integrin binding	146	0.385079	1.88094	7.30504e-06	6.49995e-05	3.8058e-05	5045	tags=35%, list=20%, signal=28%	6387/3680/10516/11093/11117/975/8425/1842/7057/10666/3553/58494/3385/10979/3384/310/3681/1285/5764/63923/7106/3084/959/2674/255743/3913/3689/7450/4067/7412/8516/83700/83706/11095/3676/6850/3479/3690/3684/27329/1758/3912/10457/928/87/2247/3695/9358/8754/1307/3964
BP	GO:0034504	protein localization to nucleus	259	-0.364249	-1.71647	7.32836e-06	6.50091e-05	3.80636e-05	4988	tags=37%, list=20%, signal=30%	3837/201163/6469/5514/9688/54830/29775/9258/6789/5300/10694/23633/6672/8878/7486/26272/25885/4771/6714/1277/55929/7015/6612/25792/6495/23212/51307/8841/3728/25942/63928/51366/10049/79711/4193/183/4321/23636/10574/55198/51715/7016/56257/152877/55027/55696/51208/7295/10576/51194/51804/6788/7341/7037/10073/9972/10762/55746/6608/705/22948/908/10155/3985/585/1736/23511/80279/3840/2932/9500/1871/10575/…
BP	GO:0097553	calcium ion transmembrane import into cytosol	134	0.384601	1.85557	7.55912e-06	6.69803e-05	3.92178e-05	4958	tags=35%, list=20%, signal=28%	5621/1193/2534/10268/3357/387129/6366/6363/5144/3270/5023/126306/356/9474/6622/2946/11151/5311/2149/5336/59341/477/5031/1535/4067/55503/3932/287/9446/5788/6348/57192/2185/2811/781/22821/9187/1236/54923/255231/2247/801/3596/825/774/6263/2814
BP	GO:0006721	terpenoid metabolic process	92	0.453671	2.05017	7.5962e-06	6.72328e-05	3.93656e-05	4110	tags=40%, list=16%, signal=34%	9227/1571/125/5947/1544/5959/220/127/54658/1576/4035/124/1559/1592/83875/128/54884/10170/8608/130/64577/1558/54659/126/1565/9249/1543/6715/8228/216/224/285440/151056/1551/57104/1562/317749
MF	GO:0031406	carboxylic acid binding	154	0.374521	1.85151	7.64374e-06	6.75772e-05	3.95673e-05	4101	tags=32%, list=16%, signal=27%	1621/2350/27036/114132/9227/945/6403/5306/5947/23569/6279/27180/2219/4846/54658/5375/2950/9380/9971/89790/2167/1592/5033/80765/7903/5105/6401/128/2946/6280/27181/5730/5066/2170/241/54659/6470/27232/2752/173/5660/10841/32/5095/221120/5091/2729/1629/1373
CC	GO:1905368	peptidase complex	99	-0.464116	-1.94225	7.69413e-06	6.7946e-05	3.97832e-05	6336	tags=56%, list=25%, signal=42%	5720/5886/5721/28972/5328/143471/5694/5718/94005/9097/5700/6883/90637/5714/27429/5704/5706/5717/6878/5682/10213/5715/5719/9789/5689/5716/3315/11047/5690/5709/5686/29979/5702/23198/10939/5687/51604/56943/7415/51377/5701/5695/56970/5693/8733/10197/9690/5708/8295/5692/128869/5707/5710/835/5691
BP	GO:0003151	outflow tract morphogenesis	77	0.469316	2.0523	7.70397e-06	6.79563e-05	3.97893e-05	4516	tags=42%, list=18%, signal=34%	4091/2022/9464/23414/7048/10427/4889/7049/659/3091/2627/8321/10370/1906/55742/7122/9249/3725/7481/6899/6909/2296/8829/4208/26508/57057/2006/54345/3611/3280/657/9241
BP	GO:0002823	negative regulation of adaptive immune response based on somatic recombination of immune receptors built from immunoglobulin superfamily domains	53	0.539815	2.21219	7.78515e-06	6.85952e-05	4.01633e-05	2686	tags=38%, list=11%, signal=34%	339390/4092/9173/1378/3824/1604/3575/3821/6504/722/2213/3134/84868/3566/3565/5788/84695/604/11006/56940
BP	GO:0002430	complement receptor mediated signaling pathway	10	0.853055	2.19646	7.79898e-06	6.86398e-05	4.01894e-05	1086	tags=70%, list=4%, signal=67%	2357/2358/1378/2359/728/719/1240
MF	GO:0140030	modification-dependent protein binding	134	-0.427768	-1.87098	7.80957e-06	6.86558e-05	4.01988e-05	4436	tags=37%, list=18%, signal=31%	51720/9641/9666/8878/2186/2332/124930/23613/55072/80764/139886/23170/10927/23310/54799/30827/81858/7158/65980/8535/222229/84993/57680/169981/29979/26147/130617/23198/83746/84733/2956/7415/11091/1616/8019/23468/55689/5929/26009/84126/6597/55666/11335/11137/56893/23512/5710/29128/54892/8805
BP	GO:0006284	base-excision repair	41	-0.590847	-2.08036	7.87839e-06	6.91832e-05	4.05076e-05	4489	tags=54%, list=18%, signal=44%	5426/8091/7486/1763/10075/5111/7374/6119/23583/4968/4595/6996/27301/328/10038/7515/3978/55247/3980/5424/2237/10721
BP	GO:0060402	calcium ion transport into cytosol	150	0.371888	1.82375	7.96007e-06	6.98222e-05	4.08817e-05	4958	tags=35%, list=20%, signal=28%	5621/1193/2534/10268/148/3357/387129/6366/6363/5144/3270/5023/126306/356/596/9474/6622/2946/11151/5311/2149/5336/59341/477/5031/1535/2056/4067/55503/3932/287/9446/5788/4308/6348/57192/2185/2811/781/22821/9187/1236/54923/857/255231/2247/801/3596/825/774/6263/2814
MF	GO:0008009	chemokine activity	47	0.548921	2.17465	7.97857e-06	6.99062e-05	4.09309e-05	2590	tags=34%, list=10%, signal=31%	6387/6368/6359/9547/6352/6347/6369/6366/6363/6372/388372/2920/414062/58191/6349/6348
BP	GO:0045907	positive regulation of vasoconstriction	32	0.635137	2.30863	8.33393e-06	7.28568e-05	4.26585e-05	1548	tags=31%, list=6%, signal=29%	147/1621/6915/6916/5743/148/10800/342527/952/2149
BP	GO:0006401	RNA catabolic process	229	-0.370661	-1.7351	8.33013e-06	7.28568e-05	4.26585e-05	4374	tags=33%, list=17%, signal=27%	23019/60493/9641/1618/65110/5578/9261/4292/114609/4343/23658/22803/2332/55596/1763/389421/22916/79675/221662/6499/51538/9775/3304/115752/54542/4848/6832/131405/56915/10921/51010/91875/10940/57472/51154/399664/9704/8570/55095/4116/54512/54555/8087/65109/9238/23404/1736/328/23367/26019/10642/246243/10128/7186/22794/79072/8241/56339/3182/90806/4849/4686/57819/9887/54915/25904/1660/80153/27044/23381/…
BP	GO:0001938	positive regulation of endothelial cell proliferation	86	0.452169	2.03825	8.36435e-06	7.30412e-05	4.27665e-05	2570	tags=29%, list=10%, signal=26%	1893/6387/2658/7010/654/2152/3162/185/94/3357/8742/659/26051/6369/5293/6774/3091/23411/3164/7472/7424/1535/3725/207/8829
BP	GO:0050858	negative regulation of antigen receptor-mediated signaling pathway	31	0.634268	2.29705	8.56187e-06	7.46828e-05	4.37277e-05	2686	tags=48%, list=11%, signal=43%	11314/11126/5621/1997/79037/26191/4068/9404/2213/7805/84174/115352/3958/11006/56940
BP	GO:0010951	negative regulation of endopeptidase activity	222	0.332654	1.71416	9.01325e-06	7.85326e-05	4.59818e-05	4102	tags=30%, list=16%, signal=25%	8530/5621/5743/1378/7980/8434/9314/2/3082/710/7057/1654/4803/51232/831/5627/3428/7078/1471/960/199713/256394/2621/939/58189/653145/9806/1285/6653/6622/3476/3164/7079/56925/684/135/10653/6691/3700/5176/25816/5271/207/5447/358/6694/5267/4018/55031/5858/10935/112401/7124/5037/334/10972/7077/10879/26998/57630/10406/8301/1410/5272/1992/5329/351
BP	GO:0006979	response to oxidative stress	383	0.292708	1.60749	9.02372e-06	7.85364e-05	4.5984e-05	3274	tags=26%, list=13%, signal=23%	10516/5156/558/5621/1571/5743/3162/3040/2308/3043/114757/388/2395/2534/7837/695/1398/3082/27244/4780/199/10365/2530/4846/7099/1827/9962/10628/653361/2353/11030/2950/9124/301/2034/3091/4170/8382/4255/8575/8321/80310/10550/2878/4482/2081/948/1906/3717/4153/22925/2643/596/2110/847/23411/8061/6622/952/4313/65018/5311/120892/6649/240/4353/79661/6898/84557/11035/22933/5516/761/3725/3240/8692/3569/468/3…
MF	GO:0002039	p53 binding	59	-0.529783	-2.02336	9.15226e-06	7.95668e-05	4.65873e-05	2924	tags=42%, list=12%, signal=38%	4193/8312/4194/56254/117584/1387/8550/9891/7158/10919/3065/57680/10419/3329/2932/1616/7159/6598/6597/55159/80196/10197/8805/641/1020
BP	GO:1904645	response to amyloid-beta	48	0.528008	2.11565	9.23578e-06	8.02039e-05	4.69603e-05	4915	tags=62%, list=20%, signal=50%	2358/5621/2534/4804/10268/5641/7099/4035/948/4313/2213/7412/23621/2697/58533/154/3676/2048/3479/10333/7124/5663/781/1139/351/837/177/2309/774/3480
BP	GO:0048247	lymphocyte chemotaxis	57	0.516486	2.1399	9.27689e-06	8.04717e-05	4.71171e-05	4433	tags=44%, list=18%, signal=36%	6368/6359/9023/6352/1667/6347/6369/6366/6363/5293/5294/729230/2621/388372/414062/58191/6349/6348/6288/2185/6362/6357/6558/6360/387695
BP	GO:0035743	CD4-positive, alpha-beta T cell cytokine production	19	0.732448	2.30297	9.37817e-06	8.12602e-05	4.75788e-05	3504	tags=58%, list=14%, signal=50%	8809/3554/975/114548/3553/2625/91543/6504/3569/3565/3456
CC	GO:0042575	DNA polymerase complex	17	-0.755204	-2.17373	9.59228e-06	8.29319e-05	4.85576e-05	2088	tags=71%, list=8%, signal=65%	5426/5558/10459/10714/54108/5422/5557/5424/54107/5427/23649/4172
MF	GO:0008186	ATP-dependent activity, acting on RNA	70	-0.50241	-1.99961	9.5882e-06	8.29319e-05	4.85576e-05	3878	tags=43%, list=15%, signal=36%	9879/4343/1656/6499/9775/6832/90957/11056/1662/9704/11325/57696/54505/64794/54555/83990/79039/1653/60625/22907/57647/1663/9416/1659/51428/54606/8449/1660/80119/25788
BP	GO:0070646	protein modification by small protein removal	127	-0.428051	-1.85256	9.71276e-06	8.3881e-05	4.91133e-05	5851	tags=42%, list=23%, signal=32%	64854/83443/85015/83844/7345/389856/57646/8975/79184/10869/9097/26054/6883/84749/51720/55230/84669/57559/6878/10213/84196/84132/10987/205564/50813/57663/51633/59343/6873/3094/139562/7398/171023/55432/10617/8314/56943/6877/7415/126119/64708/51377/57695/6874/56970/2873/8078/9825/27005/9960/8295/10980/10713
MF	GO:0017171	serine hydrolase activity	163	0.365336	1.8018	1.00067e-05	8.63247e-05	5.05442e-05	3619	tags=27%, list=14%, signal=23%	1675/922/5547/3003/2152/715/1511/51279/3001/716/1520/3426/3083/5649/3002/54504/11098/2999/2160/11012/8720/4327/2158/5648/4313/7177/649/2159/10747/5327/3240/8858/83752/5654/4316/7092/4018/5340/3818/7113/5046/3004/10003/566
BP	GO:0071459	protein localization to chromosome, centromeric region	18	-0.743882	-2.1756	1.00213e-05	8.63553e-05	5.0562e-05	2017	tags=61%, list=8%, signal=56%	55920/55166/9183/10403/27085/55055/9735/81620/1058/9212/7272
BP	GO:0002719	negative regulation of cytokine production involved in immune response	27	0.673529	2.34912	1.02413e-05	8.8154e-05	5.16152e-05	3504	tags=52%, list=14%, signal=45%	4092/3162/11213/7043/10225/6504/684/3134/604/11006/335/7124/284/3456
BP	GO:0002407	dendritic cell chemotaxis	22	0.697533	2.32025	1.02813e-05	8.84015e-05	5.17602e-05	1711	tags=45%, list=7%, signal=42%	1230/6352/6366/6363/5294/729230/2621/7852/6688/6504
BP	GO:0002762	negative regulation of myeloid leukocyte differentiation	46	0.539426	2.14508	1.03041e-05	8.84999e-05	5.18177e-05	2662	tags=41%, list=11%, signal=37%	6422/714/7099/4609/9935/7098/10272/3635/11025/7107/10234/1021/325/4067/5295/3565/6348/55294/11006
BP	GO:0003015	heart process	233	0.329467	1.71878	1.03445e-05	8.87118e-05	5.19418e-05	3466	tags=27%, list=14%, signal=23%	147/4092/133/140/1910/1193/3764/4634/2534/10268/148/5142/4846/6324/5144/10060/5294/2034/2627/3270/2934/5999/7054/1906/3717/7852/2643/9474/2946/5997/10413/6196/6444/796/477/3753/125111/5020/5348/489/6909/3741/287/2697/9446/30845/6330/2258/6548/29119/3781/79717/482/153/11214/27129/59272/6720/51086/7124/781/23171
CC	GO:0030055	cell-substrate junction	397	0.290595	1.5964	1.03514e-05	8.87118e-05	5.19418e-05	4921	tags=33%, list=20%, signal=27%	7010/2022/5239/6503/9173/390/388/85458/91624/975/2273/10580/8826/51056/11170/5880/6189/9349/90102/2274/79038/3055/4035/567/4739/9124/301/10174/960/10979/1969/8321/2934/6125/3603/10673/3717/847/4311/7431/64098/6168/8462/9404/6386/91179/6122/59341/7106/8773/6133/171024/6237/6129/8470/23521/143903/10544/55742/23224/1535/6207/309/3689/3716/10278/10672/6146/9902/8516/8650/2697/10982/30845/5788/83478/2…
BP	GO:0007131	reciprocal meiotic recombination	45	-0.575741	-2.0759	1.04664e-05	8.95012e-05	5.2404e-05	1617	tags=38%, list=6%, signal=35%	79703/83990/116138/29893/5889/11077/5885/8438/84057/4439/146956/80010/25788/9319/2177/10635/7153
BP	GO:0140527	reciprocal homologous recombination	45	-0.575741	-2.0759	1.04664e-05	8.95012e-05	5.2404e-05	1617	tags=38%, list=6%, signal=35%	79703/83990/116138/29893/5889/11077/5885/8438/84057/4439/146956/80010/25788/9319/2177/10635/7153
CC	GO:1990391	DNA repair complex	34	-0.61888	-2.08042	1.10112e-05	9.40576e-05	5.50719e-05	5130	tags=62%, list=20%, signal=49%	4437/2547/51317/2072/4292/27030/1069/64421/7158/5395/4436/2956/79728/7515/1161/2071/55215/5591/5424/672/2177
BP	GO:0016485	protein processing	218	0.324882	1.6779	1.11854e-05	9.54414e-05	5.58821e-05	3531	tags=28%, list=14%, signal=24%	7123/9509/8530/11093/922/5621/2152/5552/715/147372/2619/10418/2395/1511/51279/5641/1520/7057/3083/831/3428/834/119587/27141/199713/2934/79659/1359/2160/2737/8532/2158/4311/2028/120892/6196/649/23761/81555/58484/1203/5327/84976/85409/590/3240/23621/83752/7092/60559/3818/7113/5046/59272/5289/1361/5663/50846/5567/83874/3633
MF	GO:0042277	peptide binding	284	0.313869	1.67322	1.13403e-05	9.66579e-05	5.65943e-05	5046	tags=33%, list=20%, signal=26%	8685/1393/7433/10288/10148/2358/5621/10332/912/1910/712/30835/4804/10268/30061/4889/2947/23428/7099/929/4481/4035/7096/1471/3133/1240/7097/3125/2690/948/6653/847/972/4311/2946/2028/10316/3106/5530/3115/2642/1191/3136/3113/2213/3953/5204/3122/3134/3689/3117/590/5295/2346/23621/3949/1394/154/3643/4883/2048/6344/10333/335/321/2944/3684/3119/25907/8484/911/1396/10266/8301/1410/1139/143458/4142/4043/1…
BP	GO:0000281	mitotic cytokinesis	66	-0.522208	-2.05656	1.13681e-05	9.67891e-05	5.66712e-05	1570	tags=29%, list=6%, signal=27%	10617/375/9820/585/9700/10899/6242/26586/3925/3619/54443/24137/9493/55165/1058/10112/29127/1894/51203
BP	GO:0051656	establishment of organelle localization	347	-0.331087	-1.61024	1.14041e-05	9.69908e-05	5.67893e-05	3576	tags=27%, list=14%, signal=24%	1778/55288/23212/81929/10987/10948/3799/5871/225689/10239/10540/23557/3996/57102/1113/23287/23636/10079/4134/55773/7016/9919/26985/54732/9001/10726/84501/10342/10300/1453/23291/27436/8976/5537/22906/80179/10494/1072/4646/4976/150465/3985/585/7534/199953/254263/4133/1639/8943/11267/55166/7514/54874/9183/10128/59349/3692/84722/3993/9371/23513/9700/8546/55341/4640/10403/83540/9368/157769/1201/10615/…
BP	GO:0044106	cellular amine metabolic process	104	0.425228	1.97162	1.142e-05	9.70202e-05	5.68065e-05	3594	tags=33%, list=14%, signal=28%	1621/9464/4837/2639/4061/5153/9056/217/2034/9971/6303/112483/7054/27284/3067/6999/2643/2625/6622/1312/3176/8564/29958/4129/3689/4929/285671/18/635/26002/6799/3684/4204/8942
BP	GO:0070206	protein trimerization	15	0.787055	2.29048	1.15041e-05	9.75236e-05	5.71012e-05	3838	tags=60%, list=15%, signal=51%	79689/55600/972/6506/197259/241/84976/171425/286133
BP	GO:0061756	leukocyte adhesion to vascular endothelial cell	45	0.561801	2.22702	1.15013e-05	9.75236e-05	5.71012e-05	3591	tags=47%, list=14%, signal=40%	6387/6403/10164/2113/9314/6366/58494/6402/2650/729230/6401/240/3689/7412/3569/6404/64116/3676/7189/7124/5724
BP	GO:1904646	cellular response to amyloid-beta	39	0.575983	2.22575	1.15948e-05	9.81861e-05	5.74891e-05	4379	tags=64%, list=17%, signal=53%	2358/5621/2534/4804/5641/7099/4035/948/2213/7412/23621/2697/58533/154/3676/2048/3479/10333/7124/5663/781/351/837/177/2309
BP	GO:0050832	defense response to fungus	49	0.541466	2.1652	1.16324e-05	9.83981e-05	5.76133e-05	5361	tags=53%, list=21%, signal=42%	5322/1511/6279/6283/1668/57817/1667/81030/64581/6280/6688/5336/4353/50856/23406/1669/9958/245928/23765/64170/387695/170482/383/4057/117159/10578
BP	GO:0032872	regulation of stress-activated MAPK cascade	176	0.353853	1.76969	1.17371e-05	9.91763e-05	5.80689e-05	4503	tags=36%, list=18%, signal=30%	6422/9464/2308/85458/3489/4616/3082/4615/7099/26191/4609/3553/6366/6363/10125/51339/653361/7098/2950/64581/9611/10550/51562/939/9770/355/5609/5048/80824/3476/65018/7164/4281/6688/9867/6386/10912/59341/6504/8600/5187/2213/23328/140885/1540/56940/7189/5604/2185/54106/7124/1843/1647/8324/57630/64170/1236/2047/351/177/142679/4317/4294
MF	GO:0070330	aromatase activity	24	0.673827	2.28493	1.18294e-05	9.98491e-05	5.84628e-05	4227	tags=54%, list=17%, signal=45%	1571/1544/1576/1559/8529/1549/1558/1543/64816/66002/1551/1562/1579
BP	GO:0003205	cardiac chamber development	155	0.363543	1.79281	1.19898e-05	0.000101012	5.91436e-05	2939	tags=26%, list=12%, signal=24%	5138/4091/7010/2022/4092/9464/653/2294/4634/23414/9510/7048/4889/7049/659/4846/2274/4061/639/3091/2627/60485/8321/9353/10370/2625/7472/3084/5457/55742/9249/7481/6899/6909/287/2296/8829/4208/26508/6586/57057
BP	GO:0051047	positive regulation of secretion	284	0.313178	1.66954	1.1993e-05	0.000101012	5.91436e-05	5110	tags=32%, list=20%, signal=26%	6387/114897/654/1910/945/6279/7099/51762/3553/143425/7043/1080/3091/9971/3822/116/8529/7097/1906/3717/201294/4824/22925/9474/2268/6622/952/65018/4628/6386/8564/640/9501/135/9367/8600/7424/1535/25924/3134/3689/5020/23086/9525/3566/3565/358/2746/18/2752/5213/6850/55763/3479/1361/7376/27183/3684/5724/8111/10802/10972/2771/2244/5106/57555/1385/6934/7200/1579/6558/5532/55691/27230/8723/6754/341359/283…
BP	GO:0062012	regulation of small molecule metabolic process	288	0.302975	1.62179	1.20501e-05	0.000101275	5.92977e-05	4304	tags=32%, list=17%, signal=27%	114897/654/133/653/5743/2308/4837/5166/10580/4846/4609/3815/3553/23417/9056/6774/301/3091/9971/27122/9611/51141/10613/6095/8720/5341/23411/972/6622/37/65018/343035/7033/6615/8604/9104/2170/2642/5443/2646/5031/3953/8671/3487/10464/11160/2819/5507/207/171425/1958/33/27232/5447/83752/3565/51744/2053/3949/2875/6591/5957/337/3643/4790/635/2185/2672/54361/6720/3479/5509/7376/335/7124/5663/2203/32/5724/…
BP	GO:0001933	negative regulation of protein phosphorylation	288	0.30286	1.62118	1.20501e-05	0.000101275	5.92977e-05	3578	tags=27%, list=14%, signal=24%	4908/11314/6422/4091/2022/4092/3486/10253/5621/11117/64092/11213/5787/4616/5783/3082/6456/143941/54386/9021/26191/28951/203228/3553/5144/4035/2950/54922/26524/2167/9353/54900/9770/9467/6653/80824/23411/91663/1027/6622/104/83891/5997/120892/1848/84619/9104/5728/135/10252/1028/22933/10464/3725/4067/10507/8692/140885/207/5788/11006/58533/54206/56940/7320/5925/10019/2048/79705/6609/57732/6879/245928/…
BP	GO:0001822	kidney development	284	0.31314	1.66934	1.21561e-05	0.000102057	5.97555e-05	4227	tags=29%, list=17%, signal=25%	6422/4091/7010/5156/654/4092/6943/1910/185/3399/10409/3764/5915/9510/4070/8826/639/4609/2650/28514/80310/79659/9353/1592/8842/1285/2736/4824/8837/596/1286/847/2737/2625/4311/7704/10413/2028/5311/120892/9104/445/10252/1028/384/2674/255743/3913/5176/7481/25976/5175/8692/55083/8516/5087/1958/8642/30812/2296/8829/168667/284541/4208/26508/55959/5613/54361/2255/3037/284/6569/84159/38/168002/341640/5754…
BP	GO:1904035	regulation of epithelial cell apoptotic process	73	0.466185	2.00159	1.21797e-05	0.000102145	5.98073e-05	5066	tags=51%, list=20%, signal=41%	7010/11126/3162/7538/4780/677/1003/6347/7057/831/2621/2934/356/3717/22925/8837/2625/10413/959/3569/3565/51129/5925/3676/5598/7124/284/2244/10266/6934/666/2309/3596/409/3480/283120/1965
BP	GO:1905954	positive regulation of lipid localization	80	0.447216	1.96497	1.25914e-05	0.000105485	6.17627e-05	5526	tags=45%, list=22%, signal=35%	114897/654/9227/1071/51703/4481/3553/4035/8529/356/948/1906/2180/4824/22925/2170/8600/1582/5020/55754/346/4790/114885/7376/335/32/5244/1579/6754/6342/10062/10938/51738/1149/118471/718
CC	GO:0001891	phagocytic cup	26	0.655875	2.27171	1.29859e-05	0.000108674	6.36298e-05	3377	tags=42%, list=13%, signal=37%	199/7099/375033/301/9938/11151/11031/56990/64005/57192/7124
MF	GO:0008236	serine-type peptidase activity	160	0.370338	1.82332	1.31056e-05	0.000109441	6.40792e-05	3619	tags=28%, list=14%, signal=24%	1675/922/5547/3003/2152/715/1511/51279/3001/716/1520/3426/3083/5649/3002/54504/11098/2999/2160/11012/8720/4327/2158/5648/4313/7177/649/2159/10747/5327/3240/8858/83752/5654/4316/7092/4018/5340/3818/7113/5046/3004/10003/566
BP	GO:0009914	hormone transport	258	0.317061	1.67654	1.31046e-05	0.000109441	6.40792e-05	5110	tags=30%, list=20%, signal=24%	1393/6422/114897/654/133/185/695/8425/6352/5799/23428/8074/51762/51092/415116/3553/143425/1080/301/3091/9971/116/1906/3717/4824/2625/952/640/59341/5530/9501/240/8773/5443/10599/8600/25924/6567/4067/55503/3569/3741/2697/3033/2746/1394/18/2752/5213/6720/7124/91355/54097/6814/1408/8111/1081/3557/2244/5106/57555/1385/6934/7200/90007/5532/7351/27230/8723/5950/2850/55512/2550/8140/1908/4160/4041/51738
BP	GO:0003044	regulation of systemic arterial blood pressure mediated by a chemical signal	48	0.521967	2.09144	1.33147e-05	0.000110956	6.49663e-05	3164	tags=33%, list=13%, signal=29%	147/1910/185/1511/148/4846/5144/1359/1906/2028/6196/2149/1535/153/154/59272
BP	GO:0046637	regulation of alpha-beta T cell differentiation	65	0.486765	2.06052	1.33153e-05	0.000110956	6.49663e-05	3997	tags=43%, list=16%, signal=36%	4092/7048/3142/942/864/639/114548/6363/301/3594/3662/2737/2625/7704/7535/3122/3707/3566/3565/84695/604/11006/10892/6850/941/3593/57630/84807
BP	GO:1905517	macrophage migration	49	0.539996	2.15932	1.36208e-05	0.000113381	6.63861e-05	4452	tags=49%, list=18%, signal=40%	64805/1436/1910/11117/6441/975/6352/728/6347/7057/719/729230/1240/4920/59341/6504/3958/6348/6288/2185/566/928/255231/131450
BP	GO:0045931	positive regulation of mitotic cell cycle	110	-0.445282	-1.89037	1.37301e-05	0.00011417	6.68476e-05	3815	tags=41%, list=15%, signal=35%	134353/7015/23236/80174/6868/25942/4193/1977/7027/56257/8450/1978/55920/1981/3297/150465/55835/328/5889/1019/163786/51433/8317/3169/51434/57504/286053/993/51692/9700/990/27085/995/26271/51514/8697/6241/51529/6240/81620/994/891/6491/11065/113130
BP	GO:0051216	cartilage development	176	0.351617	1.75851	1.38711e-05	0.00011522	6.74624e-05	5636	tags=38%, list=22%, signal=29%	1893/2658/654/4092/9464/653/4094/5915/94/7048/22856/633/659/864/340419/3091/960/2690/1906/2737/7704/25987/6615/4920/8313/202018/649/59341/55790/9451/309/2202/7481/8692/860/5447/3213/2121/4208/6591/5925/55959/2487/4256/51320/657/9241/2247/1116/7076/9421/2249/55512/23516/7482/3373/7059/392255/51738/4880/130497/265/1513/5741/55553/655
BP	GO:0007143	female meiotic nuclear division	26	-0.676053	-2.15837	1.39975e-05	0.000116147	6.80052e-05	1025	tags=50%, list=4%, signal=48%	84501/5889/11077/84930/29781/10403/26271/9319/994/6790/9133/7272/7153
CC	GO:1905369	endopeptidase complex	76	-0.495586	-2.00991	1.41938e-05	0.000117651	6.8886e-05	6336	tags=62%, list=25%, signal=46%	5720/5886/5721/5328/143471/5694/5718/94005/9097/5700/90637/5714/27429/5704/5706/5717/5682/10213/5715/5719/5689/5716/3315/11047/5690/5709/5686/29979/5702/23198/5687/51604/7415/51377/5701/5695/5693/8733/10197/9690/5708/5692/128869/5707/5710/835/5691
BP	GO:0050829	defense response to Gram-negative bacterium	72	0.469996	2.01498	1.46084e-05	0.000120959	7.08232e-05	3619	tags=32%, list=14%, signal=27%	219972/2220/920/11126/6403/1511/6039/1668/1667/7099/820/6037/6372/3569/1669/358/10133/54210/6556/245928/54106/3593/566
BP	GO:0045055	regulated exocytosis	219	0.332799	1.71515	1.51326e-05	0.000125036	7.32098e-05	5026	tags=34%, list=20%, signal=28%	1393/11314/3162/2294/8676/695/84106/148/5880/3815/10125/3055/143425/5293/6844/4818/5294/3822/729230/5023/83849/8832/201294/5729/5341/2268/6622/11151/107/8867/120892/6688/5730/640/9501/11031/3598/8773/135/2213/3134/306/3689/4067/55503/57586/23621/3566/3565/6348/6850/9341/55207/5663/3684/6814/5724/10972/2771/2242/415117/5532/23208/8723/341359/5868/3596/51150/3071/27342/3965/112476/9846/90019/9381
BP	GO:0032409	regulation of transporter activity	243	0.320732	1.68384	1.51326e-05	0.000125036	7.32098e-05	4177	tags=29%, list=17%, signal=25%	1393/53826/51185/5621/1193/288/2273/5142/6347/1520/6324/5144/2040/5649/2669/7881/6844/1080/729230/3270/126306/3306/1906/596/6622/2946/28954/65018/5311/9104/5336/54800/2745/477/5031/3753/2056/5348/287/148811/9446/30845/6330/2258/79026/6548/53827/54413/482/1394/154/6236/4208/2048/1742/2185/1612/59272/54106/781/23171/5724/55917/11331/10142/5292/6786/57555/57120/351/57520
BP	GO:0016525	negative regulation of angiogenesis	85	0.457029	2.04713	1.51976e-05	0.00012544	7.34469e-05	4307	tags=35%, list=17%, signal=29%	2658/7010/1634/10253/11126/11117/9314/9510/23166/10365/7057/7075/729230/1969/356/1285/240/7122/5176/64218/2296/5797/6678/7124/4204/1647/5140/57556/7058/6558
BP	GO:0043409	negative regulation of MAPK cascade	156	0.364028	1.78732	1.524e-05	0.000125658	7.35743e-05	3378	tags=31%, list=13%, signal=27%	11314/6422/10253/11117/2308/11213/57447/1847/7099/26191/4609/3553/51339/7078/2950/9611/284996/55584/374403/54900/8661/5048/6653/80824/3476/5997/65018/1848/467/5728/10252/1844/5187/4067/8692/140885/5788/1540/55885/27330/11006/54206/10019/2048/6609/59272/245928/5037
CC	GO:0005911	cell-cell junction	448	0.281082	1.57609	1.58986e-05	0.000130951	7.66732e-05	3560	tags=25%, list=14%, signal=22%	7010/28513/5239/83604/4092/23136/288/5010/8631/91624/4804/10580/8826/6442/57817/659/9071/1003/6324/3702/3815/58494/5101/9075/3937/9124/301/54532/54922/60485/28514/10979/1969/5376/220296/29109/7454/25932/91663/7535/11151/7409/5311/595/963/364/79778/54566/6386/59341/5530/11007/2701/8773/9073/914/54800/421/916/477/126374/64236/7122/4354/125111/6624/22933/57165/5348/4067/5295/5175/3741/207/287/8642/2…
BP	GO:0070192	chromosome organization involved in meiotic cell cycle	50	-0.550295	-2.04527	1.60718e-05	0.000132238	7.74267e-05	4398	tags=46%, list=17%, signal=38%	10111/56159/56154/4292/27030/23310/10919/701/51547/83990/29893/5889/5885/29781/4439/898/9918/10592/9319/2177/9134/699/10051
BP	GO:0080164	regulation of nitric oxide metabolic process	54	0.518097	2.12162	1.62182e-05	0.000133262	7.80265e-05	3704	tags=46%, list=15%, signal=40%	5743/5740/3043/9314/199/10365/7099/3553/64581/948/1906/3717/5311/961/9104/445/1191/140885/207/3643/2185/10333/7124/64902/706
BP	GO:0070231	T cell apoptotic process	48	0.518668	2.07823	1.62303e-05	0.000133262	7.80265e-05	3299	tags=46%, list=13%, signal=40%	155038/81704/6352/1831/3575/3091/356/939/355/1178/2737/6194/384/11035/29124/5588/207/6482/3958/55716/171558/3559
BP	GO:0051090	regulation of DNA-binding transcription factor activity	393	0.281455	1.54963	1.63897e-05	0.00013443	7.87105e-05	4199	tags=29%, list=17%, signal=24%	4092/9464/140/8809/5621/10346/3162/5740/3399/3397/11213/8807/8320/695/9314/3059/54386/6279/5583/6283/4615/59307/2099/7099/5602/3815/114548/3553/3055/5649/7098/6774/64581/9971/60485/3398/8321/2621/1240/7097/948/1906/3717/4824/8837/847/23411/2737/8061/57121/6425/56849/65018/4692/107/5311/6280/1491/6688/5728/5336/5530/7472/1191/58484/5457/8600/959/11035/5516/306/408/84868/5588/3569/207/49860/307/154…
MF	GO:0016779	nucleotidyltransferase activity	99	-0.455804	-1.90747	1.64619e-05	0.000134881	7.89745e-05	5983	tags=44%, list=24%, signal=34%	5435/5130/10914/54187/5436/84172/5438/2272/55907/5426/10622/25885/7015/56903/5441/5429/27434/11153/27304/11128/51728/10621/171568/11164/80347/10623/55703/5437/1736/10714/8732/5439/26015/54108/5422/5557/29926/5424/5433/54107/5427/9477/80308/10721
BP	GO:0061640	cytoskeleton-dependent cytokinesis	78	-0.487808	-1.98374	1.67016e-05	0.000136701	8.00403e-05	1570	tags=27%, list=6%, signal=25%	10617/375/9820/585/54784/9700/10899/6242/26586/3925/3619/54443/24137/9493/55165/1058/9212/10112/29127/1894/51203
BP	GO:0035924	cellular response to vascular endothelial growth factor stimulus	58	0.501915	2.08792	1.67413e-05	0.000136884	8.01472e-05	4031	tags=41%, list=16%, signal=35%	5156/1634/10253/147372/2619/4495/5293/301/28514/2081/3164/2322/7424/64094/7412/207/2296/8829/967/2549/3593/5606/10266/57556
BP	GO:2000377	regulation of reactive oxygen species metabolic process	128	0.38646	1.83974	1.68016e-05	0.000137234	8.03519e-05	3747	tags=36%, list=15%, signal=31%	10516/2358/5547/185/2308/2534/7048/4780/5880/7099/7057/7305/2950/64581/3091/948/2643/8837/596/9474/83875/6622/65018/5336/240/384/1535/11035/22933/2773/3689/84329/3240/51181/1182/6850/2185/59272/10333/7124/3684/1647/664/10013/706/2771
MF	GO:0004114	3',5'-cyclic-nucleotide phosphodiesterase activity	23	0.690515	2.33143	1.69012e-05	0.000137903	8.07438e-05	3648	tags=43%, list=15%, signal=37%	5138/8622/27115/5142/5153/5144/5136/5151/5146/5140
BP	GO:1905314	semi-lunar valve development	41	0.55244	2.15662	1.71143e-05	0.000139497	8.16771e-05	2939	tags=41%, list=12%, signal=37%	4091/11117/7133/7132/659/4846/7075/9353/2625/6615/4772/140628/6591/5925/26508/6586/57057
BP	GO:0032412	regulation of ion transmembrane transporter activity	219	0.331621	1.70908	1.75409e-05	0.000142825	8.36259e-05	4177	tags=30%, list=17%, signal=25%	1393/53826/51185/5621/1193/288/2273/5142/6347/1520/6324/5144/2040/5649/2669/7881/6844/1080/729230/3270/126306/3306/1906/2946/28954/65018/5311/9104/5336/54800/2745/477/5031/3753/2056/5348/287/9446/30845/6330/2258/79026/6548/53827/54413/482/1394/154/6236/4208/2048/1742/2185/1612/54106/781/23171/5724/11331/10142/6786/57555/57120/351/57520
CC	GO:0034399	nuclear periphery	114	-0.43896	-1.87281	1.75812e-05	0.000143005	8.37311e-05	6114	tags=49%, list=24%, signal=37%	7157/3141/9360/9126/7175/84844/29945/4137/8243/22944/57731/26993/9894/9688/9782/78994/10969/284695/1605/10856/6002/5111/30827/4602/9984/9972/4968/51588/5687/1072/4221/25909/1161/3692/5885/4000/10274/57122/22880/8607/64395/26502/5422/8573/4841/4001/11260/6732/790/6839/29128/23165/24137/641/1063/22976
BP	GO:0006937	regulation of muscle contraction	149	0.365722	1.79482	1.76867e-05	0.000143714	8.41462e-05	5523	tags=38%, list=22%, signal=30%	147/6915/4092/5743/1193/4634/148/5142/3815/5144/5294/4660/3270/5023/60675/1906/3778/2946/7140/5997/3164/2149/59341/796/477/255743/309/5020/287/9446/30845/9732/2258/6548/29119/154/18/10398/59272/51086/151/5724/10142/857/10021/4608/801/93649/7135/4636/51738/150/6546/845/340481/775/84193
CC	GO:0005925	focal adhesion	389	0.289851	1.59169	1.77207e-05	0.00014384	8.42203e-05	4921	tags=33%, list=20%, signal=27%	7010/2022/5239/6503/9173/390/388/85458/91624/975/2273/10580/8826/51056/11170/5880/6189/9349/90102/2274/79038/3055/4035/567/4739/9124/301/10174/960/10979/1969/8321/2934/6125/3603/10673/3717/847/4311/7431/64098/6168/8462/9404/6386/91179/6122/59341/7106/8773/6133/171024/6237/6129/8470/23521/143903/10544/55742/23224/1535/6207/309/3689/3716/10278/10672/6146/9902/8516/8650/2697/10982/30845/5788/83478/2…
BP	GO:0045601	regulation of endothelial cell differentiation	34	0.615593	2.28298	1.77962e-05	0.000144304	8.44917e-05	692	tags=26%, list=3%, signal=26%	2658/55273/654/84913/3397/94/7132/1003/3553
BP	GO:0050819	negative regulation of coagulation	48	0.515965	2.0674	1.79797e-05	0.000145435	8.5154e-05	4221	tags=40%, list=17%, signal=33%	5156/114897/7056/710/4846/7057/5627/2160/1906/5327/10544/18/5340/3818/10019/2811/1361/2244/928
BP	GO:0035825	homologous recombination	47	-0.56162	-2.06117	1.79769e-05	0.000145435	8.5154e-05	1617	tags=36%, list=6%, signal=34%	79703/83990/116138/29893/5889/11077/5885/8438/84057/4439/146956/80010/25788/9319/2177/10635/7153
MF	GO:0016705	oxidoreductase activity, acting on paired donors, with incorporation or reduction of molecular oxygen	138	0.373632	1.8141	1.79914e-05	0.000145435	8.5154e-05	4239	tags=36%, list=17%, signal=30%	2327/1621/6916/1571/5743/9023/3162/5740/113612/51302/1544/4846/1576/1559/8529/1592/5033/7054/79966/1555/2328/8564/5066/1549/1558/1582/1565/254295/1543/1593/64816/5447/1548/284541/66002/5742/285440/26002/283985/2329/51004/1551/221120/79068/1573/1562/5053/1579/6718
BP	GO:0042531	positive regulation of tyrosine phosphorylation of STAT protein	62	0.491898	2.06177	1.86139e-05	0.000150312	8.80095e-05	3421	tags=34%, list=14%, signal=29%	1436/2534/3059/7132/6352/3815/3572/2690/3717/3600/2322/2056/10464/4067/3569/3565/1489/3263/3479/7124/3593
BP	GO:1990845	adaptive thermogenesis	152	0.366946	1.79617	1.86405e-05	0.000150371	8.80443e-05	5203	tags=43%, list=21%, signal=34%	1621/51316/8809/3397/249/7099/10400/2034/56034/729230/116/2167/1240/948/3717/2180/7852/3662/6653/2104/3600/10912/25979/59341/58488/5334/50486/3953/79054/5020/468/57406/2697/33/148811/3033/3566/3565/6778/216/291/1376/153/154/5925/6850/1051/4883/6344/7376/57561/1666/79602/10891/857/7253/7351/3596/23090/3480/10062/4160/51738/283455/1149
CC	GO:0005771	multivesicular body	56	0.507827	2.09596	1.86993e-05	0.000150691	8.82314e-05	2638	tags=38%, list=10%, signal=34%	1393/8530/9227/55340/146894/6441/5222/643834/7178/6653/972/120892/55240/246213/684/9476/2674/973/23621/967/643847
BP	GO:0007200	phospholipase C-activating G protein-coupled receptor signaling pathway	93	0.442854	2.00617	1.90237e-05	0.000153148	8.967e-05	1965	tags=26%, list=8%, signal=24%	147/9630/64805/2357/2358/8477/1910/185/1902/148/3357/2359/2099/728/719/1240/5330/27334/1906/2149/10316/2841/796/5031
BP	GO:1904874	positive regulation of telomerase RNA localization to Cajal body	13	-0.804133	-2.12351	1.91145e-05	0.000153721	9.00052e-05	4246	tags=85%, list=17%, signal=70%	10694/10856/10574/10576/22948/908/55164/1736/10575/8607/7203
MF	GO:0008391	arachidonic acid monooxygenase activity	20	0.720215	2.31132	1.91645e-05	0.000153965	9.01483e-05	4227	tags=65%, list=17%, signal=54%	1571/1559/8529/1555/1549/1558/1543/1548/284541/66002/1573/1562/1579
MF	GO:0043177	organic acid binding	125	0.389268	1.84964	1.92215e-05	0.000154252	9.03162e-05	4101	tags=32%, list=16%, signal=27%	1621/2350/9227/3399/3040/3043/5306/23569/6279/27244/4846/54658/9971/5023/1592/5033/7054/6999/6280/5066/2170/3047/445/3048/6898/241/54659/6470/27232/2746/2752/10841/32/5095/3042/221120/5091/2729/1629/1373
BP	GO:0006898	receptor-mediated endocytosis	225	0.324941	1.68278	1.92396e-05	0.000154252	9.03162e-05	4874	tags=35%, list=19%, signal=28%	8685/55576/4908/133/2358/6614/6441/975/7048/10268/23166/3357/84896/929/4481/6366/6363/2207/4035/283420/567/115548/28514/948/22925/6401/6653/6622/8867/6386/7436/5336/11031/1191/58191/9873/2213/3689/408/85021/8650/2060/55788/3565/29978/3949/284654/967/54413/11006/154/3676/6850/3643/1742/55716/79890/3690/284/3684/6453/10266/8301/143458/347730/928/857/4043/23149/50618/116519/5868/2868/22876/8578/5538…
CC	GO:0044665	MLL1/2 complex	27	-0.658873	-2.12161	1.94089e-05	0.000155132	9.08318e-05	3921	tags=56%, list=16%, signal=47%	6878/10856/54881/84661/57680/26121/81887/4221/11091/6874/5929/1876/3054/8607/10445
CC	GO:0071339	MLL1 complex	27	-0.658873	-2.12161	1.94089e-05	0.000155132	9.08318e-05	3921	tags=56%, list=16%, signal=47%	6878/10856/54881/84661/57680/26121/81887/4221/11091/6874/5929/1876/3054/8607/10445
CC	GO:0005814	centriole	108	-0.448101	-1.90287	1.93716e-05	0.000155132	9.08318e-05	7063	tags=49%, list=28%, signal=35%	80254/822/116840/9786/10426/51098/25776/284001/55704/25914/26005/5116/90060/9657/80705/54903/50487/55125/9857/219844/51199/1069/79959/225689/9814/54875/3304/10101/124093/9001/56890/4957/11190/2733/10806/3796/22995/55835/585/8924/1639/163786/7840/10198/347240/284403/10733/899/7283/55165/6790/6491/7153
BP	GO:0019218	regulation of steroid metabolic process	92	0.439442	1.98587	1.94412e-05	0.000155232	9.08903e-05	6032	tags=52%, list=24%, signal=40%	654/133/653/185/54658/3815/3490/9971/27122/51141/10613/6095/8720/23411/37/6615/11160/1958/33/5447/2053/3949/6591/337/4790/2672/54361/6720/335/7124/50846/23541/1081/706/116519/8647/6777/3480/3638/427/11218/2330/134429/79798/9619/1066/2246/2516
BP	GO:0044774	mitotic DNA integrity checkpoint signaling	71	-0.496163	-1.97866	1.95899e-05	0.000156261	9.14924e-05	1630	tags=45%, list=6%, signal=42%	79184/5514/5884/51720/8091/51343/80198/11200/56658/4193/1017/4436/54962/80279/9656/11073/5883/57551/55159/1386/990/146956/29980/5591/51514/60561/835/672/1111/51512/2177/641
MF	GO:0004112	cyclic-nucleotide phosphodiesterase activity	24	0.666255	2.25926	2.0558e-05	0.000163517	9.57411e-05	3648	tags=42%, list=15%, signal=36%	5138/8622/27115/5142/5153/5144/5136/5151/5146/5140
BP	GO:0001776	leukocyte homeostasis	84	0.444703	1.9896	2.05395e-05	0.000163517	9.57411e-05	2994	tags=35%, list=12%, signal=31%	558/30061/5142/1831/10461/5293/608/301/3091/729230/6372/23495/10673/355/596/972/11151/2322/6194/55619/139818/11035/3707/4067/3569/207/83700/4208/10019
BP	GO:0045598	regulation of fat cell differentiation	119	0.399425	1.88162	2.05622e-05	0.000163517	9.57411e-05	4143	tags=35%, list=16%, signal=30%	6422/83643/5743/284207/2308/23414/122953/7538/677/28951/678/60485/3398/10979/1240/1389/6095/23411/2625/7704/10413/3400/59341/240/11007/22933/3569/207/862/55885/6591/1051/2487/7124/7041/6783/10013/5292/79068/1385/51320/3280
BP	GO:0062197	cellular response to chemical stress	295	0.305769	1.64438	2.10242e-05	0.000167021	9.77928e-05	2668	tags=25%, list=11%, signal=22%	10516/5156/558/5743/3162/2308/388/2395/2534/695/3082/4780/677/199/10365/2530/4846/7099/1654/4609/653361/4638/2353/301/2034/3091/4170/8382/4255/8575/8321/80310/10550/4482/2081/948/1906/3717/355/22925/2643/596/9474/847/23411/6622/4313/92241/65018/5311/120892/6649/59341/240/472/4353/84557/2056/11035/22933/9451/3725/3569/468/140885/207/5151/4929/6778/358/80303/55294/54206
BP	GO:0043551	regulation of phosphatidylinositol 3-kinase activity	50	0.519712	2.07019	2.10665e-05	0.000167187	9.78902e-05	3098	tags=38%, list=12%, signal=33%	7010/5156/64805/2358/9021/8835/3815/6366/6363/23533/2268/2322/113791/84174/4067/5295/10451/5343/2185
BP	GO:0032703	negative regulation of interleukin-2 production	24	0.665676	2.25729	2.1273e-05	0.000168656	9.87499e-05	2662	tags=50%, list=11%, signal=45%	11326/5621/1378/6441/7538/9971/2625/7805/84868/5788/3902/11006
[truncated: 1,906 more rows]
