# Supplementary material for: Exploring key biomarkers of liver fibrosis progression to hepatocellular carcinoma based on immune cell-related genes
Source: Research Square preprint supplement (doi:10.21203/rs.3.rs-6479983/v1), 2025-05-21
Supplement: Supplementary file 7 [file 754c48baa0915a893e09e90e.xlsx]

## Sheet: LYVE1.KEGGgsea
ID	Description	setSize	enrichmentScore	NES	pvalue	p.adjust	qvalue	rank	leading_edge	core_enrichment
hsa03010	Ribosome	129	-0.574597	-2.69476	1e-10	1.11e-08	6.38596e-09	3778	tags=49%, list=15%, signal=42%	6201/6135/6137/6231/6138/6173/6168/219927/11224/6133/6224/6130/6160/6203/6146/6171/6124/6235/6142/6141/25873/51373/6189/3921/6208/6191/6209/6233/6218/6143/6217/6232/54460/6170/6181/6132/6230/6152/6222/6175/6207/6204/124995/6136/6193/6144/6206/6156/6210/6227/6154/6223/6194/6188/6187/4736/6169/6205/6139/2197/6157/23521/6165
hsa01240	Biosynthesis of cofactors	133	0.506521	2.48689	1e-10	1.11e-08	6.38596e-09	5217	tags=46%, list=21%, signal=37%	6999/8942/2729/2643/441024/55312/8564/4522/8836/7358/124454/4337/79646/4143/1723/53354/23475/55163/80347/6470/51805/125061/203/65220/7363/7364/217/54659/1719/29968/8630/5805/6697/4833/57026/211/54995/3145/154807/7360/84274/51727/10243/2677/51004/6472/4338/23498/54657/79001/210/10720/54577/5373/50808/2235/2730/1738/29925/5372/248
hsa05171	Coronavirus disease - COVID-19	219	-0.436165	-2.21305	1e-10	1.11e-08	6.38596e-09	4295	tags=44%, list=17%, signal=37%	23586/51311/4314/4599/103/6166/51065/7098/6201/6135/3446/6137/6231/1839/6138/5296/6173/6168/11224/6403/6133/3592/114548/6224/6130/6347/6160/712/6203/6146/6171/6124/6235/6142/6141/25873/3445/6189/3921/4939/6208/6191/2162/9636/6209/713/6233/6218/6143/5293/6217/6232/6170/6181/59272/6132/6230/6850/7450/6152/6222/6175/6207/6204/3627/6136/4600/6193/5603/5335/6144/6206/10379/6156/6210/6227/6154/6223/512…
hsa04146	Peroxisome	75	0.572213	2.54738	1.75955e-10	1.46482e-08	8.4273e-09	5153	tags=57%, list=20%, signal=46%	8800/3295/10478/51703/2180/5825/5194/51/6647/5264/196743/847/54363/3155/570/30/6342/10901/5827/3418/26063/5189/51179/26061/25824/23600/55825/54677/11001/8504/189/5830/8309/1384/23305/1891/51268/92960/5824/23417/5826/8540/1962
hsa00380	Tryptophan metabolism	37	0.69267	2.6184	1.59983e-09	1.06549e-07	6.12988e-08	5153	tags=78%, list=20%, signal=62%	6999/8942/316/501/8564/51166/64577/38/1892/1544/2639/55526/847/125061/39/3030/1644/217/3033/1543/15/23498/4128/4129/130013/121278/1738/223/1962
hsa04514	Cell adhesion molecules	147	-0.462221	-2.22171	2.16665e-09	1.20249e-07	6.91808e-08	5149	tags=44%, list=20%, signal=35%	5788/84631/6402/3118/3135/4684/3117/9379/9019/3125/8516/22829/3119/58494/3676/3683/5133/10666/1462/3680/6403/965/942/5797/3684/958/3655/4267/3133/3685/959/214/3689/23114/3695/90952/2734/79679/29851/1493/3105/3112/9073/940/4756/3113/5175/925/8506/3122/3109/83700/57689/914/923/3108/3115/3106/57555/5010/3134/3111/947/9071/1366
hsa00071	Fatty acid degradation	41	0.66789	2.5707	3.39224e-09	1.61374e-07	9.28403e-08	5153	tags=71%, list=20%, signal=56%	51703/36/501/35/2180/34/38/51/1892/2639/126/30/39/3030/217/3033/10449/33/130/128/125/37/23305/127/124/3032/1374/223/1962
hsa00280	Valine, leucine and isoleucine degradation	47	0.635126	2.52472	7.93747e-09	2.93686e-07	1.68961e-07	3155	tags=60%, list=13%, signal=52%	36/64087/316/594/18/501/35/34/38/64902/11112/1892/4329/27034/3155/593/30/39/3030/26275/217/3033/10449/3028/3158/84693/5095/1629
hsa05416	Viral myocarditis	59	-0.606684	-2.46243	7.68882e-09	2.93686e-07	1.68961e-07	4800	tags=59%, list=19%, signal=48%	3118/3135/3117/25/3125/60/3119/842/3683/5551/942/71/958/6443/3133/959/284217/3689/5879/857/3105/3112/6444/940/3113/3122/3109/3108/3115/6442/3106/5880/3134/3111/3908
hsa04145	Phagosome	147	-0.44239	-2.12639	3.31872e-08	9.20945e-07	5.29831e-07	4842	tags=44%, list=19%, signal=36%	7278/3118/84617/3135/3117/23480/4689/9902/51382/3125/60/6891/533/2209/653361/4973/3693/81035/90423/3678/3119/4688/6441/51606/22925/526/5869/79659/84790/3684/71/4074/8992/3133/3685/3916/525/10312/3689/7846/10376/347733/7058/529/1781/5879/537/6890/3105/3112/3673/9296/1535/3113/78989/3122/3109/338382/3108/11151/3115/3106/3134/3111/9341
hsa04510	Focal adhesion	191	-0.412819	-2.04292	3.24823e-08	9.20945e-07	5.29831e-07	4696	tags=41%, list=19%, signal=33%	858/2318/5728/859/4660/56034/3674/60/8395/7791/1287/8516/5747/5499/64098/6464/3693/3265/7423/3678/5500/5296/3676/3680/5154/3611/71/387/3655/3082/5228/8515/3909/3685/3918/5058/1299/824/284217/3675/1286/3695/6714/1285/5293/7058/1277/1282/1291/3915/5879/7450/596/857/2064/1298/3673/6696/81/1284/10398/3912/896/3691/5595/1278/1293/5156/7424/5602/5155/5880/5159/80310/894/10319/1292/3908
hsa05166	Human T-cell leukemia virus 1 infection	213	-0.392693	-1.98628	3.196e-08	9.20945e-07	5.29831e-07	4809	tags=37%, list=19%, signal=30%	112/3118/3135/5533/3117/5728/7157/598/3125/3560/387332/3559/5971/11200/3265/3119/9519/890/6688/567/5296/3683/196883/3932/4791/4776/6929/6776/9133/958/8498/991/10393/3133/7514/25847/4214/3561/29945/2113/3689/9184/111/5293/5532/9232/916/581/2874/706/1031/6513/4049/7042/4487/3600/64764/3105/3112/1019/4316/1029/3113/1870/3122/3109/896/109/5595/3108/915/3115/3106/5602/3134/894/3111/917
hsa05168	Herpes simplex virus 1 infection	443	-0.321214	-1.74759	5.06576e-08	1.29761e-06	7.46534e-07	5964	tags=34%, list=24%, signal=26%	155061/158431/51385/29992/90317/1616/148206/3459/125919/55713/58500/284349/3123/163049/90333/163081/146540/163059/253639/7248/7643/4940/147694/5451/728343/3654/148156/8427/9422/7755/146542/3118/147657/3135/3117/170958/7157/65251/121274/598/126017/23586/7576/3125/6891/58492/90233/90321/5499/684/7730/7098/126375/57573/162967/3446/7625/93474/170959/3678/3119/5500/10780/84527/79891/567/5296/6672/6041…
hsa04512	ECM-receptor interaction	85	-0.52365	-2.2683	1.04052e-07	2.47495e-06	1.42387e-06	4036	tags=48%, list=16%, signal=41%	1287/8516/3693/3678/158326/3676/3680/3339/255743/3655/8515/9900/3909/3685/3918/1299/284217/3675/1286/3695/1285/7058/1277/1282/1291/3915/961/7450/1298/3673/6696/1284/3912/3691/1278/80144/1293/375790/10319/1292/3908
hsa05165	Human papillomavirus infection	324	-0.341418	-1.79772	1.87053e-07	4.15259e-06	2.38903e-06	4790	tags=34%, list=19%, signal=28%	84441/388585/3135/7474/5728/7157/7484/8324/81029/3674/5734/4599/51382/533/1287/387332/2778/92359/8516/1741/5747/7098/3693/3446/3265/1108/90423/3678/8325/9519/28227/890/5521/5296/3676/7976/51606/3680/526/84552/3655/3996/4242/8992/8515/3955/3133/3909/8313/3685/3918/3445/8321/1299/284217/1856/525/3675/10134/10312/1286/9636/3695/3065/80326/1285/5293/7058/581/529/1277/1282/1291/4854/3915/7450/537/2535…
hsa01200	Carbon metabolism	108	0.447883	2.11222	2.28256e-07	4.75059e-06	2.73307e-06	3734	tags=43%, list=15%, signal=36%	2271/5631/221823/35/38/2875/51/1892/4191/2203/4329/2027/847/54363/8789/2746/5224/6470/2806/229/39/6390/1373/26275/29968/26227/6391/5313/84693/3418/3101/128/51179/55753/275/6392/8803/5095/6472/5091/6389/189/3419/3099/4967/2731
hsa00830	Retinol metabolism	63	0.540067	2.28286	2.49473e-07	4.88674e-06	2.8114e-06	5626	tags=54%, list=22%, signal=42%	316/1592/1544/126/1562/317749/7363/7364/54659/10901/8630/1543/130/8228/128/1576/1558/125/8608/1555/54657/127/5959/10720/1577/54577/157506/54884/124/340665/1559/8694/216/54905
hsa04610	Complement and coagulation cascades	84	0.491678	2.23538	4.85208e-07	8.97634e-06	5.1642e-06	4105	tags=52%, list=16%, signal=44%	2157/731/10877/727/735/2160/729/2165/2243/7035/2158/1361/10747/732/721/3075/2266/2153/5624/720/3078/2155/629/7448/1191/722/718/715/81494/3818/3827/716/717/725/5054/5627/2244/462/5340/3426/5345/5104/10878/3053
hsa05323	Rheumatoid arthritis	90	-0.487788	-2.13754	5.61238e-07	9.83644e-06	5.65902e-06	4801	tags=47%, list=19%, signal=38%	8600/3118/3117/6374/4314/51382/3125/533/90423/3119/3683/51606/526/942/6347/8992/2919/525/3589/10312/3689/529/284/7042/537/6387/3600/1493/3112/6352/9296/940/3113/6372/3122/3109/4050/3108/3115/3111/10673/1513
hsa04612	Antigen processing and presentation	75	-0.502815	-2.12606	1.10797e-06	1.84476e-05	1.06132e-05	5985	tags=55%, list=24%, signal=42%	3458/4261/3824/5994/5641/3822/3123/3812/4802/3118/3135/3117/3821/3811/3125/6891/3310/3119/3326/567/10197/8625/5721/3133/6892/3306/6890/3105/3112/3113/5993/925/3122/3109/5720/3108/3115/3106/3134/972/3111
hsa05330	Allograft rejection	37	-0.629201	-2.31289	1.25288e-06	1.89641e-05	1.09103e-05	4800	tags=62%, list=19%, signal=50%	3118/3135/3117/3125/3119/5551/3592/942/958/3133/959/3105/3112/3002/940/3113/3122/3109/3108/3115/3106/3134/3111
hsa04936	Alcoholic liver disease	136	0.403273	1.98509	1.20114e-06	1.89641e-05	1.09103e-05	5000	tags=40%, list=20%, signal=32%	51422/727/9663/501/1147/6416/5606/34/1432/5562/8737/51/2920/721/5609/929/3452/126/720/32/5465/53632/10891/718/217/7124/84818/130/717/128/3929/6934/3449/23175/9020/125/2308/7189/37/4615/7099/3551/3443/3444/127/148022/208/124/23765/1571/1374/23417/5565/223
hsa05169	Epstein-Barr virus infection	196	-0.374781	-1.86787	1.47339e-06	2.04433e-05	1.17613e-05	4800	tags=35%, list=19%, signal=28%	3118/7128/3135/3117/7157/23586/3125/2208/5708/6891/5971/3446/3119/890/567/5296/842/3683/4791/965/958/919/5710/7188/3133/7186/4067/695/3445/4939/9636/930/864/9612/3065/5293/916/581/6892/6850/5879/596/6890/3627/8717/3105/3112/953/5603/1019/10379/3113/1870/3122/3109/896/7431/3108/915/9641/3115/3106/6772/5602/3134/894/3111/917
hsa04810	Regulation of actin cytoskeleton	213	-0.362277	-1.83243	1.47339e-06	2.04433e-05	1.17613e-05	4464	tags=38%, list=18%, signal=31%	10552/85477/26281/4660/56034/3674/4629/10093/60/8395/10097/8516/5747/5499/22800/54434/3693/3265/3678/5500/5296/3676/3683/28964/2846/3071/3680/4478/8826/2254/5154/4627/3684/71/387/3655/8515/3685/2263/10152/5058/2934/2768/3675/5216/10095/9965/3689/3695/9459/6548/6714/7114/4628/5293/10163/2245/5879/6387/10094/22808/1902/1072/3673/81/10109/10398/3691/5595/7852/5156/89846/5155/5880/5159/80310/2261/730…
hsa04672	Intestinal immune network for IgA production	47	-0.574349	-2.23552	2.06133e-06	2.7457e-05	1.57963e-05	4800	tags=53%, list=19%, signal=43%	3118/3117/3125/5284/3119/3676/942/958/959/3695/608/6387/3600/29851/3112/56477/940/3113/3122/3109/3108/3115/7852/3111/10673
hsa00620	Pyruvate metabolism	46	0.568065	2.25306	2.41854e-06	3.0976e-05	1.78208e-05	5122	tags=59%, list=20%, signal=47%	2271/501/38/4191/126/32/2739/39/98/217/3939/5313/130/5105/128/3029/125/5091/127/5162/124/197257/134526/1738/223/5106/5161
hsa04950	Maturity onset diabetes of the young	20	0.72764	2.36033	3.14591e-06	3.83403e-05	2.20577e-05	2280	tags=50%, list=9%, signal=46%	3172/2494/3170/3375/3171/3174/6514/5313/3087/5078
hsa04940	Type I diabetes mellitus	43	-0.58592	-2.23344	3.22381e-06	3.83403e-05	2.20577e-05	4800	tags=56%, list=19%, signal=45%	3118/3135/3117/3125/3382/3119/5551/5799/3592/942/3133/4049/3105/3112/3002/940/3113/3122/3109/3108/3115/3106/3134/3111
hsa00260	Glycine, serine and threonine metabolism	39	0.579775	2.19678	3.89692e-06	4.47473e-05	2.57437e-05	4394	tags=51%, list=17%, signal=42%	29958/501/64902/875/5224/6470/29968/26227/2628/23464/211/1757/314/275/6472/189/4128/2731/4129/51268
hsa05340	Primary immunodeficiency	36	-0.60406	-2.19158	5.26363e-06	5.65415e-05	3.2529e-05	2972	tags=50%, list=12%, signal=44%	3932/8625/100/958/959/695/3561/930/916/3543/6890/29851/5993/925/915/973/7535/3575
hsa04640	Hematopoietic cell lineage	95	-0.462431	-2.04004	5.1883e-06	5.65415e-05	3.2529e-05	5965	tags=56%, list=24%, signal=43%	960/1380/3568/3123/966/2322/3563/924/3118/3117/3674/931/911/3125/2208/3559/2209/4254/3678/2993/3119/952/3676/910/3684/3655/1438/909/1436/3675/3589/930/913/916/2323/3112/3673/3113/925/3122/3109/914/3108/915/3115/921/3815/100133941/3111/947/3575/917/951
hsa05320	Autoimmune thyroid disease	52	-0.535449	-2.12901	5.82204e-06	6.05856e-05	3.48556e-05	4800	tags=48%, list=19%, signal=39%	3118/3135/3117/3125/3446/3119/5551/942/958/3133/959/3445/1493/3105/3112/3002/940/3113/3122/3109/3108/3115/3106/3134/3111
hsa05332	Graft-versus-host disease	41	-0.590954	-2.23545	6.61731e-06	6.67746e-05	3.84163e-05	5623	tags=59%, list=22%, signal=46%	3123/3812/3118/3135/3117/3821/3811/3125/3119/5551/942/3133/3105/3112/3002/940/3113/3122/3109/3108/3115/3106/3134/3111
hsa04151	PI3K-Akt signaling pathway	336	-0.310666	-1.64632	2.42588e-05	0.000237594	0.00013669	4442	tags=30%, list=18%, signal=25%	2788/11140/598/26281/56034/3674/3560/29941/1287/3559/8516/5747/3693/4254/3446/3265/7423/3678/94235/2787/3326/28227/7533/5521/5296/8115/3676/842/2846/3680/7039/2254/5154/7534/54541/3655/3082/5228/8515/3164/3909/3685/2263/3918/2782/2793/92579/1436/3561/3445/1299/284217/3675/1286/9965/930/3695/1285/5293/7058/5585/284/1277/6850/1282/1291/3915/2791/5879/7450/596/2323/64764/2064/1298/1902/3673/6696/101…
hsa03008	Ribosome biogenesis in eukaryotes	62	0.471842	1.98441	2.8541e-05	0.000271547	0.000156224	7743	tags=63%, list=31%, signal=44%	55272/55916/57455/23160/51068/84128/10885/10199/10557/65083/55341/26354/10775/134430/10171/55781/23560/92856/10607/51367/55813/9790/51096/84135/54552/10799/23195/83732/54464/9724/1457/56001/5901/51077/10482/25996/10813/56000/166378
hsa00310	Lysine degradation	47	0.530065	2.10709	2.96959e-05	0.000274687	0.000158031	5153	tags=47%, list=20%, signal=37%	501/51166/38/1892/2639/55526/55217/39/3030/217/10157/3033/8424/56979/5352/2145/84444/51268/23067/1738/223/1962
hsa05132	Salmonella infection	229	-0.33971	-1.7276	3.05313e-05	0.000274782	0.000158085	4842	tags=33%, list=19%, signal=27%	7278/9367/84617/63916/10092/2318/10552/57381/10093/60/8677/10097/399/3265/8767/7295/3326/3800/3071/3831/114548/5869/79659/84790/10006/71/387/4074/54106/83657/8655/11258/7186/5058/6993/5216/10095/29108/7846/302/5293/10376/347733/10392/5585/79443/581/1781/5879/51209/596/10094/23207/6281/8717/23643/5603/10120/29109/10540/10109/5420/11035/10398/6188/834/5595/338382/5294/5602/7100/6237/83658/51176/391
hsa04670	Leukocyte transendothelial migration	104	-0.418148	-1.87834	3.49414e-05	0.000306197	0.000176159	4323	tags=38%, list=17%, signal=32%	4689/4318/60/5747/653361/10411/399/58494/5296/3676/3683/4688/4478/83593/3684/71/387/4267/1495/3689/5293/90952/5879/6387/5603/9073/5335/81/1535/5175/10398/7070/83700/2771/7852/3702/5880/5010/9071/1366
hsa00410	beta-Alanine metabolism	30	0.602924	2.18291	4.48304e-05	0.000382783	0.000220219	5153	tags=60%, list=20%, signal=48%	18/501/35/1806/51/1892/84735/4329/1807/3030/26275/217/314/51380/51733/23417/223/1962
hsa04062	Chemokine signaling pathway	184	-0.351878	-1.73347	4.84333e-05	0.000403207	0.00023197	4497	tags=34%, list=18%, signal=28%	6361/6357/2788/6374/1524/2931/5747/6369/653361/6367/5330/6464/3265/94235/2787/643/2870/5296/196883/6376/6362/729230/6373/57580/6347/387/2782/2793/4067/5058/1794/2919/6714/111/5293/7454/5580/2791/5879/1235/6387/4283/3627/10663/10344/5335/6352/56477/2869/6372/109/5595/2771/7852/5294/3702/6772/5880/6363/1236/2833/6366
hsa05414	Dilated cardiomyopathy	95	-0.433201	-1.91109	6.01955e-05	0.000488905	0.000281273	4987	tags=42%, list=20%, signal=34%	7134/778/112/781/3674/55799/60/2778/8516/1674/153/3693/3678/3676/196883/2010/3680/71/6443/3655/8515/3685/284217/3675/3695/4634/7168/111/775/7042/489/7171/3673/6444/7169/109/3691/6442/784/3908
hsa00650	Butanoate metabolism	26	0.610301	2.13153	6.97882e-05	0.000553321	0.000318332	3859	tags=62%, list=15%, signal=52%	7915/6296/18/35/38/1892/3155/622/39/3030/3033/3158/54988/123876/348158/79944
hsa00982	Drug metabolism - cytochrome P450	66	0.448709	1.9222	8.03495e-05	0.000622242	0.000357983	4825	tags=44%, list=19%, signal=36%	316/1544/2940/126/1557/4257/7363/7364/54659/130/128/1576/1558/2939/125/221357/1555/4128/54657/2330/4129/2329/127/10720/1577/54577/124/1571/1559
hsa05204	Chemical carcinogenesis - DNA adducts	65	0.446596	1.90433	0.000106984	0.000809673	0.000465815	5144	tags=42%, list=20%, signal=33%	10/1544/2940/3290/64816/6799/1557/1562/4257/7363/7364/54659/1543/6817/1576/445329/1558/2939/221357/6822/54657/10720/1577/54577/1571/1559/6818
hsa00020	Citrate cycle (TCA cycle)	30	0.579657	2.09867	0.000129018	0.000954731	0.000549268	5122	tags=60%, list=20%, signal=48%	2271/4191/6390/6391/3418/5105/55753/6392/8803/5091/6389/3419/4967/8801/5162/1738/5106/5161
hsa04142	Lysosome	128	-0.373623	-1.74942	0.00013279	0.000961286	0.000553039	4291	tags=35%, list=17%, signal=29%	3073/2629/533/10717/1211/1512/8546/20/4126/10053/51606/84572/51172/2717/3423/5538/2760/4758/4074/1212/1521/1511/285362/175/3916/1075/10312/7805/10947/427/3074/1509/23457/10577/9179/5476/3425/4125/537/9516/27074/8906/6272/967/1513
hsa04658	Th1 and Th2 cell differentiation	92	-0.418775	-1.83798	0.00013869	0.000982635	0.000565322	4800	tags=42%, list=19%, signal=34%	3118/84441/5533/3117/3596/3125/3560/3559/3119/3460/3932/3592/3594/6776/6775/919/3561/27040/864/5532/916/4854/3714/182/3112/5603/5335/3113/3122/3109/5595/3108/915/3115/6772/7535/5602/3111/917
hsa04740	Olfactory transduction	401	0.266207	1.48443	0.000156614	0.00108651	0.000625081	8916	tags=44%, list=35%, signal=29%	144125/391194/81285/150681/219958/219983/123041/390067/346517/401992/81469/119687/138883/403282/26683/219957/219431/219493/79501/56656/403257/347169/26529/440153/390075/390321/392309/283160/283092/138803/5137/390037/8392/391112/81697/26219/442186/341416/441933/390077/119682/138882/138802/5568/6543/390883/126541/119679/26648/282763/390199/119774/8390/401993/343406/816/127385/219870/219954/817/3386…
hsa03040	Spliceosome	106	-0.399693	-1.80612	0.000161175	0.00109533	0.000630159	4915	tags=35%, list=20%, signal=28%	57461/83443/24148/51729/10713/10450/3183/6637/3310/10946/9343/51691/6636/51503/6628/22985/8449/56949/23450/57819/6626/51690/27258/6629/25949/10569/27316/3306/10992/8896/3178/9775/6633/153527/8175/10262/10465
hsa01212	Fatty acid metabolism	51	0.481643	1.95785	0.000179256	0.00117044	0.000673368	3958	tags=45%, list=16%, signal=38%	3295/51703/36/35/2180/34/38/51/1892/30/27349/39/3030/6342/3033/84869/10449/54995/33/79071/37/23305/197322
hsa05100	Bacterial invasion of epithelial cells	67	-0.457398	-1.90667	0.000177705	0.00117044	0.000673368	4698	tags=46%, list=19%, signal=38%	63916/858/10092/10552/859/10093/60/10097/5747/1211/6464/2549/3678/5296/3611/26052/71/387/1212/867/1495/10095/6714/5293/10163/5879/857/10094/10109/3059/391
hsa04974	Protein digestion and absorption	95	-0.415725	-1.83399	0.000199674	0.00127868	0.00073564	4036	tags=41%, list=16%, signal=35%	1287/91522/1295/6510/5646/483/2006/1305/1506/285641/1300/4225/476/3769/85301/9056/255631/1299/1286/1303/1285/1290/59272/1277/1282/1291/1289/1298/1307/1281/1284/1359/1296/1278/1293/7373/1306/1292/486
hsa04360	Axon guidance	176	-0.344099	-1.6861	0.000215345	0.00135302	0.000778407	4662	tags=34%, list=19%, signal=28%	7474/5533/9037/9723/818/25/81029/7869/56920/2044/285220/10500/5747/54434/2041/3265/2048/91653/5296/7976/6586/4776/84552/3611/387/90249/55558/5058/1949/6714/2049/5293/5532/5879/10505/6387/5361/84448/1072/64218/5335/2042/10507/57522/4756/10398/57689/5595/1808/219699/2771/7852/9353/54361/5880/7220/8440/6237/54961/2051
hsa00640	Propanoate metabolism	31	0.573655	2.07369	0.000219832	0.00135563	0.00077991	5153	tags=65%, list=20%, signal=51%	594/18/35/51/1892/4329/32/593/3030/26275/3939/55862/84693/8803/5095/1629/8801/23417/1738/1962
hsa00630	Glyoxylate and dicarboxylate metabolism	27	0.574159	2.03204	0.000295514	0.0017646	0.0010152	3734	tags=56%, list=15%, signal=47%	38/4191/2752/847/54363/6470/125061/39/84693/51179/275/5095/6472/189/2731
hsa00250	Alanine, aspartate and glutamate metabolism	32	0.552361	2.02006	0.00029675	0.0017646	0.0010152	2299	tags=41%, list=9%, signal=37%	2346/7915/18/443/2875/64902/2752/5471/2746/2806/1373/8659/435
hsa05412	Arrhythmogenic right ventricular cardiomyopathy	77	-0.424737	-1.80569	0.000312828	0.00182758	0.00105143	5259	tags=44%, list=21%, signal=35%	89/1829/778/781/2697/3674/55799/60/8516/1674/3693/3678/3728/3676/2010/3680/71/6443/3655/8515/3685/1495/284217/3675/3695/775/489/3673/6444/3691/6442/784/51176/3908
hsa05310	Asthma	30	-0.564238	-1.96594	0.000330704	0.0018987	0.00109234	5037	tags=60%, list=20%, signal=48%	3123/2207/3118/3117/3596/3125/3119/958/959/2205/2206/3112/3113/3122/3109/3108/3115/3111
hsa05146	Amoebiasis	98	-0.395614	-1.76173	0.00034334	0.00193783	0.00111486	4370	tags=38%, list=17%, signal=31%	384/911/1287/2778/5747/3315/5330/5296/3592/5869/910/3684/909/1511/3909/3918/2919/2769/284217/1286/3689/913/5269/1285/5293/1277/1282/3915/7042/1281/81/1284/3912/1278/338382/10319/3908
hsa00140	Steroid hormone biosynthesis	58	0.454153	1.88183	0.00036403	0.00202037	0.00116234	4777	tags=40%, list=19%, signal=32%	1544/3290/7363/6716/7364/54659/1589/8630/1543/6718/1576/6715/3293/51170/6783/1585/54657/1586/10720/1577/1581/54577/1571
hsa05145	Toxoplasmosis	107	-0.386178	-1.74983	0.000376967	0.00203501	0.00117076	3628	tags=32%, list=14%, signal=27%	3310/3119/842/3460/3592/958/3655/3588/3909/3918/959/284217/3587/3306/3915/7042/596/3112/23643/5603/3113/3912/3122/3109/5595/3108/3115/2771/5294/6772/5602/3111/10319/3908
hsa04621	NOD-like receptor signaling pathway	168	-0.341149	-1.66113	0.00037889	0.00203501	0.00117076	3688	tags=27%, list=15%, signal=24%	5330/3446/8767/7295/3326/10628/6041/7158/115361/114548/6347/387/7188/7186/3445/2919/10616/4939/64170/9051/55072/29108/7205/199713/10392/5585/115362/5580/596/2634/5603/6352/1535/10379/11035/834/51393/63940/5595/9641/3710/6772/846/5602/84168/118429
hsa03320	PPAR signaling pathway	70	0.415546	1.80104	0.000398842	0.00210816	0.00121285	5153	tags=46%, list=20%, signal=36%	51703/2180/34/51/948/364/2169/5465/30/116519/6342/10998/1582/3158/33/5105/10580/6258/11001/6256/2710/8309/23305/1622/7350/6257/51129/1581/335/1374/5106/1962
hsa00770	Pantothenate and CoA biosynthesis	21	0.617804	2.0413	0.000588119	0.00302443	0.00173999	4697	tags=57%, list=19%, signal=47%	8876/5167/1806/79646/53354/1807/80347/5169/217/51380/60496/51733
hsa04144	Endocytosis	213	-0.308582	-1.56084	0.000590353	0.00302443	0.00173999	4723	tags=32%, list=19%, signal=26%	51510/858/3135/10092/8724/2350/10552/22905/51100/859/10093/8395/10097/3560/3559/381/1211/3310/3265/80230/55048/3800/2870/29934/274/28964/22841/5869/84552/5119/26052/387/57132/1601/29082/1212/11031/1173/55737/867/3133/2263/8766/80223/3561/10095/7251/60682/56904/6714/11311/377/3306/23096/857/10094/30846/3105/30011/6456/2348/10109/2869/7852/3106/5156/3134/2261
hsa04015	Rap1 signaling pathway	201	-0.323568	-1.61896	0.000621686	0.00313669	0.00180458	6242	tags=39%, list=25%, signal=30%	23236/57121/3688/2255/5600/2149/2249/10235/10451/9002/2252/5605/7409/8822/805/5898/25780/5028/26037/112/4803/26281/56034/3674/60/2778/10411/5330/4254/3265/7423/5296/5899/3683/51735/196883/2846/2254/5154/84552/83593/3684/71/387/808/3082/5228/2263/1436/27040/5216/25865/9965/3689/6714/111/5293/51466/284/5879/51196/22808/1902/5603/5335/109/5595/135/2771/5156/3815/7424/5155/5587/5880/5159/80310/2261/6…
hsa04530	Tight junction	156	-0.336232	-1.63043	0.000652179	0.00324143	0.00186483	4304	tags=34%, list=17%, signal=28%	4629/911/27134/10093/60/10097/92359/1741/58494/5521/140465/91862/51735/4478/5111/4637/51762/84552/4627/910/84790/71/387/3996/909/4214/10095/913/6714/7846/4628/10376/7454/23370/5879/10094/2064/9073/150084/1019/81/10109/10398/83700/3059/79778/5518/5602/1080/5010/9181/9071/1366
hsa04014	Ras signaling pathway	220	-0.301632	-1.52997	0.000662623	0.0032449	0.00186683	5677	tags=35%, list=23%, signal=27%	4908/2252/5924/5605/5922/4915/8822/56924/805/2322/5966/5898/5863/25780/4803/6789/2788/25/598/26281/56034/22800/8605/6464/4254/3265/2549/7423/94235/2787/22821/5296/5899/9462/283455/7039/2254/5869/11186/5154/83593/387/808/3082/5228/2263/2782/2793/5058/1436/27040/10125/2113/9965/5293/284/2791/5879/2323/51196/22808/5335/8437/5322/5595/5156/3815/7424/7535/5602/5155/5880/5159/80310/2261/6237
hsa04061	Viral protein interaction with cytokine and cytokine receptor	91	-0.385263	-1.69356	0.00074849	0.00361228	0.00207819	4497	tags=40%, list=18%, signal=33%	6361/6357/6374/1524/3560/3559/8807/6369/6367/643/6376/6362/729230/6373/6347/53832/3588/1436/3561/2919/8764/3587/4049/1235/6387/4283/3627/10344/6352/56477/6372/7852/6363/1236/2833/6366
hsa05140	Leishmaniasis	71	-0.42626	-1.79051	0.000807158	0.00383977	0.00220906	6430	tags=52%, list=26%, signal=39%	1536/3717/3688/5600/3459/3123/7040/3654/3118/3117/4689/3125/2209/653361/1917/3119/3676/4688/3460/3592/3684/65108/3689/7042/1915/3112/5603/1535/3113/3122/3109/5595/3108/3115/6772/5777/3111
hsa05130	Pathogenic Escherichia coli infection	176	-0.326125	-1.59803	0.000885037	0.00415095	0.00238809	3196	tags=26%, list=13%, signal=22%	842/2846/3071/114548/4627/84790/10006/71/387/4644/7186/5058/2768/10095/4641/29108/6714/7846/4628/10376/347733/581/10163/5879/55930/64005/10094/1902/8717/5603/9073/10109/4642/6188/834/3059/5595/5602/5777/5010/7100/9181/9071/8440/1366
hsa05410	Hypertrophic cardiomyopathy	90	-0.386046	-1.69169	0.000975495	0.00451166	0.00259562	4987	tags=40%, list=20%, signal=32%	7040/7134/778/781/3674/55799/60/8516/1674/3693/3678/3676/2010/3680/71/6443/3655/8515/3685/1906/284217/3675/3695/4634/7168/775/7042/489/7171/3673/6444/7169/3691/6442/784/3908
hsa00350	Tyrosine metabolism	35	0.48844	1.83096	0.00111687	0.00509478	0.00293109	4706	tags=46%, list=19%, signal=37%	316/3081/2954/126/2806/1644/1638/314/130/128/2184/125/4128/4129/127/124
hsa04933	AGE-RAGE signaling pathway in diabetic complications	97	-0.378878	-1.68309	0.00114403	0.00514815	0.00296179	4053	tags=33%, list=16%, signal=28%	50507/1287/5330/3265/7423/5296/5333/6776/6347/1906/1286/1285/5293/581/1277/1282/5580/5879/7042/596/51196/5603/5335/1281/1019/1284/5595/1278/6772/7424/5602/2152
hsa05222	Small cell lung cancer	90	-0.38322	-1.67931	0.00121342	0.00538757	0.00309953	4607	tags=34%, list=18%, signal=28%	5728/7157/598/3674/1287/5915/5747/5296/842/3655/7188/3909/3685/3918/7186/284217/3675/1286/1285/5293/581/1282/3915/596/3673/1019/1284/1870/3912/10319/3908
hsa00970	Aminoacyl-tRNA biosynthesis	24	0.563601	1.9204	0.00129169	0.00559743	0.00322027	4002	tags=50%, list=16%, signal=42%	51091/57176/124454/79731/55157/57505/55699/2193/283459/80222/10056/92935
hsa01250	Biosynthesis of nucleotide sugars	35	0.483178	1.81123	0.00131111	0.00559743	0.00322027	5127	tags=57%, list=20%, signal=46%	2584/2585/7358/10020/2582/5236/3101/55907/7360/64841/5238/6675/54187/3099/55276/140838/5373/2673/29925/5372
hsa05207	Chemical carcinogenesis - receptor activation	187	0.302869	1.56529	0.0013012	0.00559743	0.00322027	4938	tags=33%, list=20%, signal=27%	196/1956/6777/84699/154/3836/1544/2940/3839/6197/5465/6198/2099/3845/4257/5894/7363/7364/54659/54567/1543/27330/604/7422/23633/107/367/1136/1576/1137/6199/6774/2939/468/2250/2773/5594/5290/6258/4853/221357/6256/1555/5295/5568/54657/1386/23746/3838/10683/6257/6654/10720/4609/54577/5291/5604/208/10728/2885/2247/779
hsa00790	Folate biosynthesis	24	0.556685	1.89683	0.00158304	0.00667281	0.00383895	3252	tags=50%, list=13%, signal=44%	5053/2643/8836/84105/4337/5860/1719/5805/6697/5092/10243/4338
hsa00120	Primary bile acid biosynthesis	17	0.628809	1.95683	0.0016453	0.00684855	0.00394006	6374	tags=82%, list=25%, signal=62%	3295/570/51302/6342/80270/10998/1582/6718/23600/8309/1581/10858/1109/1593
hsa05205	Proteoglycans in cancer	196	-0.304145	-1.51583	0.00170343	0.00700301	0.00402891	4696	tags=34%, list=19%, signal=28%	858/7474/2318/7157/7484/818/8324/859/4660/81029/4318/60/5747/5499/22800/3693/3265/2549/3678/8325/5500/7078/1839/5296/7976/287/4478/8826/3339/71/387/3082/867/3685/5058/8321/5328/80326/6548/6714/5293/1277/5879/7042/2535/288/857/51196/2064/22808/3673/5603/5335/2719/4060/6194/3059/5595/1278/3710/54361/5777/1634/3316/967/6237
hsa00760	Nicotinate and nicotinamide metabolism	28	0.526042	1.88703	0.00177109	0.00716777	0.00412371	2052	tags=32%, list=8%, signal=30%	23530/316/5167/10135/23475/22978/65220/5169/4837
hsa04060	Cytokine-cytokine receptor interaction	277	-0.280781	-1.45606	0.00178656	0.00716777	0.00412371	4497	tags=27%, list=18%, signal=23%	6361/7292/6357/6374/3604/1524/3596/970/3560/3559/8807/6369/6367/3446/643/392255/9235/6376/3460/6362/3592/729230/6373/653/3594/8771/1489/6347/944/958/657/50615/53832/1438/3588/4352/959/1436/3561/3445/2919/3603/8764/3587/3589/8784/608/652/650/9466/4049/1235/7042/6387/4283/3600/3627/7293/10663/10344/6352/56477/939/6372/4050/7852/8718/55504/27242/6363/8742/3575/10673/1236/2833/6366
hsa04931	Insulin resistance	103	0.350481	1.65027	0.00182727	0.00724381	0.00416745	5198	tags=39%, list=21%, signal=31%	51422/5781/84699/5562/948/2998/6945/32/6197/5465/6198/53632/10891/7124/6514/10998/27330/51085/5581/79660/5105/6199/6774/57818/133522/5290/183/2308/11001/5295/3551/5291/5588/208/2673/5836/1374/5565/5106/5509
hsa05131	Shigellosis	199	-0.30236	-1.50922	0.00200937	0.00787199	0.00452885	4698	tags=32%, list=19%, signal=26%	63916/10092/7157/10552/23048/598/113026/10093/60/10097/2931/5747/9978/5330/8767/3678/5296/5333/55062/64121/114548/3611/71/387/823/7188/10670/7186/10616/824/5216/10095/55072/8678/29108/6714/6233/5293/10392/581/10163/5580/80201/5879/596/10094/51196/8717/5603/5335/81/6352/10109/3098/10398/834/3059/5595/3710/5602/826/7100/9181
hsa04150	mTOR signaling pathway	133	0.321749	1.57971	0.00205835	0.00792267	0.00455801	4622	tags=36%, list=18%, signal=30%	4041/9663/51384/673/1147/5562/7855/6249/79109/96459/6197/220441/3479/6198/55615/3845/81929/5894/84335/7124/27330/9681/6520/58528/6199/7483/4040/153129/23175/89780/51256/7481/5594/5290/8408/1977/523/7473/9470/5295/7472/3551/6654/127124/7478/5291/5604/208
hsa05162	Measles	135	-0.328201	-1.55504	0.00206989	0.00792267	0.00455801	5152	tags=34%, list=20%, signal=27%	4940/27113/3654/9367/7128/7157/598/23586/4599/103/3560/3559/3310/3446/5296/842/4478/3592/1460/6776/6504/1459/54106/3561/3445/4939/8667/5293/916/581/3306/51209/596/4600/8717/1019/940/10379/51284/896/915/9641/6772/5602/894/917
hsa04978	Mineral absorption	58	0.420287	1.74151	0.00218104	0.00825326	0.0047482	3651	tags=38%, list=15%, signal=33%	7779/4489/4499/4501/4493/4495/4496/490/4494/540/113235/23439/4891/795/55630/4490/1317/4502/491/7018/54822/6543
hsa05110	Vibrio cholerae infection	49	-0.445483	-1.74624	0.00223923	0.00837825	0.00482011	4574	tags=43%, list=18%, signal=35%	23480/51382/60/533/2778/90423/51606/526/71/8992/525/10945/10312/11015/529/537/6558/5335/9296/109/1080
hsa00270	Cysteine and methionine metabolism	46	0.435521	1.72736	0.00240603	0.00890232	0.00512161	3580	tags=35%, list=14%, signal=30%	2729/55256/64902/4191/4143/875/2806/3939/29968/26227/4507/4357/7263/1036/1789/262
hsa04072	Phospholipase D signaling pathway	130	-0.331243	-1.55505	0.00247452	0.0090551	0.00520951	5267	tags=38%, list=21%, signal=30%	8527/7248/5898/2207/23396/112/56034/5737/8395/2778/56895/22800/8605/10411/5330/6464/4254/3265/2549/5296/5899/554/196883/2846/5154/1609/26052/387/553/8877/2205/2768/2206/111/5293/6850/22808/1902/5335/1606/109/5595/5294/5156/3815/5155/5159/80310/6237
hsa04975	Fat digestion and absorption	39	0.459822	1.74228	0.00257163	0.00928978	0.00534452	6085	tags=51%, list=24%, signal=39%	8513/338/19/38/948/26279/84649/2169/2806/39/4547/5407/81579/50487/335/80168/64240/8694/64600/10555
hsa00980	Metabolism of xenobiotics by cytochrome P450	71	0.38842	1.70177	0.00259444	0.00928978	0.00534452	4825	tags=38%, list=19%, signal=31%	1544/2940/126/3290/4257/7363/7364/54659/1543/130/128/1576/1572/2939/125/221357/1555/6822/54657/27294/127/10720/1577/54577/124/1571/1559
hsa00532	Glycosaminoglycan biosynthesis - chondroitin sulfate / dermatan sulfate	19	-0.576934	-1.80472	0.00338622	0.0119959	0.00690137	7301	tags=68%, list=29%, signal=49%	92126/55454/55501/11285/337876/22856/113189/64131/55790/29940/9469/64132/10090
hsa00340	Histidine metabolism	19	0.552281	1.77316	0.00349947	0.0122666	0.0070571	5000	tags=58%, list=20%, signal=46%	501/443/84735/10841/217/144193/4128/3176/4129/3034/223
hsa05418	Fluid shear stress and atherosclerosis	136	-0.326851	-1.55162	0.00364743	0.0125216	0.00720381	4696	tags=31%, list=19%, signal=25%	858/7157/2947/859/3674/4318/60/5747/653361/7295/3326/5296/119391/4688/5154/6347/71/387/657/808/1728/2949/3685/1906/6612/6714/5293/652/10365/5879/596/857/5603/1535/5175/4208/5602/5155/5880/2950/9181/5327
hsa05206	MicroRNAs in cancer	154	-0.315332	-1.52127	0.00364743	0.0125216	0.00720381	5627	tags=35%, list=22%, signal=27%	648/5605/7329/1021/3066/63923/9252/5598/6541/8434/5728/7157/1545/25/9839/5243/4318/6464/3265/3678/7078/5296/7976/1788/11186/5154/9493/387/54541/23414/5328/3065/7168/5293/2744/113130/3925/4854/7042/596/6659/2064/5335/1029/6768/1870/5595/7431/5156/5155/4082/5159/894/2261
hsa04666	Fc gamma R-mediated phagocytosis	87	-0.359679	-1.55469	0.00370354	0.0125845	0.00724001	4634	tags=37%, list=18%, signal=30%	10092/10552/85477/10093/8395/10097/2209/8605/653361/5296/274/8877/4067/5058/2934/27040/10095/65108/5293/7454/10163/6850/5580/5879/10094/1072/5335/10109/5595/3635/4082/5880
hsa05152	Tuberculosis	177	-0.310379	-1.52117	0.00390007	0.0131184	0.00754719	5305	tags=34%, list=21%, signal=27%	805/7040/4802/3654/2207/3687/3118/5533/3117/818/9902/3125/533/4046/2209/3446/8767/3119/842/3460/51606/22925/3592/5869/8625/3684/387/54106/808/3588/8877/3445/3916/64170/3587/10312/3689/6714/1509/5532/581/6850/7042/596/537/8717/3112/5603/3113/5993/3122/3109/5595/3108/11151/3115/6772/5602/972/3111
hsa04920	Adipocytokine signaling pathway	67	0.382133	1.64014	0.00419349	0.0138261	0.0079543	5907	tags=43%, list=23%, signal=33%	51703/51422/1147/2180/5781/5562/948/32/5465/53632/10891/4793/7124/5105/6774/57818/6258/6256/23305/6257/3551/5588/208/1374/5565/5106/5970/3952/10000
hsa04922	Glucagon signaling pathway	98	0.337583	1.55843	0.0041758	0.0138261	0.0079543	5122	tags=39%, list=20%, signal=31%	51422/5140/84699/5562/2998/2203/8789/32/5224/5465/5255/53632/10891/3939/6514/3709/1387/5534/5105/57818/468/5256/2308/5568/1386/816/5530/817/2642/208/2641/801/5162/5836/1374/5565/5106/5161
hsa03013	Nucleocytoplasmic transport	95	0.357674	1.64979	0.00454291	0.0148313	0.0085326	4275	tags=36%, list=17%, signal=30%	25909/4927/11260/387082/3836/79711/55705/55916/64901/9972/129401/51068/9984/3839/64328/81929/9883/11269/55161/10284/57510/10527/55308/23633/7175/4928/5905/59343/26019/10762/3838/9939/23279/4116
hsa04979	Cholesterol metabolism	49	0.414506	1.67475	0.00459943	0.01487	0.00855489	5844	tags=51%, list=23%, signal=39%	1071/9218/338/255738/19/4018/948/3931/3990/6770/9388/350/3949/27141/27329/4036/51129/1581/4035/335/8435/64240/8647/10948/336
hsa03015	mRNA surveillance pathway	86	0.35367	1.61591	0.00540631	0.0173106	0.00995898	7348	tags=51%, list=29%, signal=36%	55339/10914/23708/55916/5523/5516/11269/26528/10284/29894/53981/55308/23049/645974/2935/1479/55844/23381/29101/10898/26019/81608/5042/5515/8732/9939/51692/5528/4116/10767/8189/65109/124540/2733/5519/23283/5520/56001/5976/10482/11052/1477/9887/4686
hsa04910	Insulin signaling pathway	134	0.306286	1.50381	0.00558253	0.0175376	0.0100896	5198	tags=35%, list=21%, signal=28%	51422/673/5140/5562/2998/2203/8789/32/5255/6198/53632/3845/10891/5894/25759/5313/79660/3101/8835/5105/122809/10580/6199/369/57818/5594/5256/5577/5290/2308/1977/9470/5295/5568/3099/3551/6654/5291/5576/5604/208/801/5836/2885/5565/5106/5509
hsa04141	Protein processing in endoplasmic reticulum	149	0.294653	1.47214	0.00557875	0.0175376	0.0100896	5967	tags=36%, list=24%, signal=28%	10802/6400/9871/29979/22926/51360/10427/80267/5609/57134/51128/1965/55768/7326/8454/4121/10294/7415/6048/7095/7322/55432/3303/5611/3301/56681/7323/5887/54788/9601/468/10484/91445/55176/64374/267/9373/9695/201595/3309/3998/50613/7321/6185/440275/84447/133022/10905/2923/23193/64215/7327/11231/22872
hsa05321	Inflammatory bowel disease	65	-0.392761	-1.62812	0.00626181	0.0194877	0.0112115	5866	tags=42%, list=23%, signal=32%	51561/3459/3123/7040/59067/3118/3117/3596/3125/8807/3119/3460/3592/3594/6775/50615/3561/7042/3112/3113/3122/3109/3108/3115/6772/7100/3111
hsa05167	Kaposi sarcoma-associated herpesvirus infection	187	-0.295046	-1.46069	0.00632351	0.0194975	0.0112171	3622	tags=24%, list=14%, signal=21%	3446/3265/100507436/94235/2787/5296/4277/842/4776/942/57580/808/3133/2782/2793/7186/4067/3445/2919/8678/6714/6233/5293/5532/581/6850/2791/5879/8717/3105/5603/5335/1019/10379/1870/5595/9641/5294/3710/3106/6772/5602/5155/3134/51176
hsa04977	Vitamin digestion and absorption	21	0.540596	1.7862	0.00733715	0.0224153	0.0128958	5443	tags=48%, list=22%, signal=37%	2346/338/80704/6573/113235/9963/335/8884/25974/686
hsa04932	Non-alcoholic fatty liver disease	142	0.300756	1.49792	0.00767027	0.02322	0.0133588	6449	tags=36%, list=26%, signal=27%	83737/51422/4718/1432/5562/1327/3570/4720/4719/1965/6945/5465/53632/6390/7124/6391/51085/5313/7385/4706/6392/468/54205/374291/4702/5290/6256/6389/4729/5295/3551/4731/7381/5291/4707/208/840/1571/5565/1349/125965/5970/3952/4714/3552/10000/7494/1350/7132/1649/22877
hsa04710	Circadian rhythm	30	0.45173	1.6355	0.00788063	0.0234998	0.0135197	5027	tags=37%, list=20%, signal=29%	51422/5562/6095/8864/8863/53632/8454/8945/26224/5565/6097
hsa04152	AMPK signaling pathway	116	0.306106	1.45954	0.00790384	0.0234998	0.0135197	6263	tags=38%, list=25%, signal=29%	3172/148/51422/84699/5562/948/2998/2203/8789/32/5523/3479/6198/53632/10891/84335/5516/5862/5208/5105/6199/57818/5290/55844/8408/2308/5295/5515/5528/5291/8900/208/1374/23417/5565/5106/5211/3156/29904/3952/10000/5519/5520/5207
hsa05120	Epithelial cell signaling in Helicobacter pylori infection	67	-0.377608	-1.57407	0.00836741	0.0246579	0.014186	3560	tags=39%, list=14%, signal=33%	51382/533/90423/1839/58494/28964/51606/526/8992/4067/5058/2919/525/10312/6714/10392/529/5879/537/5603/5335/150084/6352/9296/83700/5602
hsa00053	Ascorbate and aldarate metabolism	29	0.477511	1.71951	0.0089355	0.0260451	0.014984	5000	tags=34%, list=20%, signal=28%	501/7358/7363/7364/217/54659/54657/10720/54577/223
hsa04611	Platelet activation	114	-0.32087	-1.47545	0.00905474	0.0260451	0.014984	6242	tags=39%, list=25%, signal=30%	23236/3688/5600/5593/2149/10235/2534/9002/5023/6916/2207/5028/112/3674/60/2778/5499/8605/5330/5500/5296/5739/196883/71/387/4067/695/83706/10125/6714/111/5293/1277/6850/7450/8673/3673/5603/1281/109/5595/1278/2771/5294/3710
hsa04540	Gap junction	82	-0.342486	-1.47284	0.00907275	0.0260451	0.014984	5296	tags=35%, list=21%, signal=28%	112714/5598/7278/112/84617/3357/2697/56034/2778/153/5330/3265/196883/5154/84790/6714/7846/111/10376/347733/1902/109/5595/2771/3710/5156/5155/5159/80310
hsa04064	NF-kappa B signaling pathway	95	-0.35557	-1.56861	0.00940179	0.0267589	0.0153947	4801	tags=37%, list=19%, signal=30%	8600/7128/6357/598/23586/597/5971/128178/353376/3932/4791/1460/1459/958/7188/7186/4067/959/695/2919/27040/5328/84433/6850/4049/596/6387/8717/23643/5335/4050/7535/6363/10673/6366
hsa04926	Relaxin signaling pathway	125	-0.31403	-1.46334	0.00957399	0.0270181	0.0155439	4189	tags=30%, list=17%, signal=25%	3640/4318/1287/2778/5330/6464/3265/7423/94235/2787/5296/196883/6019/2782/2793/59/1906/2769/1286/6714/1285/111/5293/1277/1282/2791/1910/64764/5603/1281/1284/109/5595/1278/2771/7424/5602
hsa00591	Linoleic acid metabolism	26	0.477293	1.66699	0.0100233	0.0280483	0.0161365	4825	tags=46%, list=19%, signal=37%	255189/1544/26279/1573/1557/1576/1558/81579/50487/283748/1571/1559
hsa05208	Chemical carcinogenesis - reactive oxygen species	186	0.268033	1.38679	0.0106201	0.0294709	0.016955	4851	tags=28%, list=19%, signal=23%	196/673/1147/6416/1956/4718/1432/5781/1327/6647/4720/4719/5609/1544/10105/2940/847/4233/3845/6390/4257/5894/291/1543/6391/7422/5795/7385/4706/369/6392/1572/2939/374291/5594/9020/4702/5290/221357/6389/4729/5295/3551/4731/7381/6654/5291/4707/5604/208/1571/2885
hsa00900	Terpenoid backbone biosynthesis	22	0.495639	1.65369	0.0114456	0.031499	0.0181217	7243	tags=55%, list=29%, signal=39%	38/39/3158/3422/10269/57107/23590/51449/3156/79947/2224/2342
hsa05170	Human immunodeficiency virus 1 infection	197	-0.285691	-1.42159	0.0117179	0.0319841	0.0184008	3875	tags=27%, list=15%, signal=23%	5747/9978/684/9582/3446/3265/94235/2787/567/5296/27350/842/10053/4776/9616/9133/919/808/7188/3133/2782/2793/7186/5058/3445/5293/5532/916/581/6892/60489/2791/5879/596/6890/1072/8717/3105/5603/5335/8906/5595/915/2771/7852/3710/3106/164668/5602/200316/5880/3134/917
hsa05010	Alzheimer disease	336	0.238587	1.31239	0.0118422	0.0320605	0.0184448	7102	tags=38%, list=28%, signal=27%	10313/4041/3416/51384/23516/673/1147/5481/4718/22926/1327/7855/4720/4719/5609/487/10105/1965/351/57142/4311/7280/3845/6390/5894/4891/1452/291/7124/3709/30849/6391/3028/9861/55630/81027/221074/5534/7385/7483/4706/369/4040/488/6392/468/89780/54205/8851/374291/7481/5594/4702/5290/8408/6389/7473/113457/4729/23401/5295/89953/7472/5695/55334/5719/3551/4731/5530/7381/102/2903/4035/7478/5291/4707/5715/28…
hsa01230	Biosynthesis of amino acids	69	0.355558	1.53956	0.012014	0.0322633	0.0185615	2299	tags=28%, list=9%, signal=25%	5053/5631/221823/2875/2752/2027/4143/875/5224/6470/2806/229/1373/29968/26227/5313/383/3418/435
hsa04650	Natural killer cell mediated cytotoxicity	127	-0.306771	-1.43918	0.012468	0.0332148	0.0191089	3670	tags=27%, list=15%, signal=23%	6464/3446/3265/100507436/5296/4277/3683/5551/3460/3932/919/3133/5058/3445/27040/9437/7462/3689/5293/5532/7305/6850/5879/10870/3105/5335/3002/5595/4068/3106/7535/5777/5880/962
hsa00670	One carbon pool by folate	18	0.541196	1.70368	0.0125885	0.0332695	0.0191404	3943	tags=61%, list=16%, signal=52%	441024/4522/2618/10588/10841/6470/1719/10840/275/6472/471
hsa04660	T cell receptor signaling pathway	100	-0.333839	-1.49277	0.0130714	0.0342737	0.0197181	3304	tags=28%, list=13%, signal=24%	5296/5133/3932/387/919/5058/959/27040/10125/84433/5293/5532/916/29851/1493/5603/5335/1019/940/925/5595/915/3702/7535/5602/5777/8440/917
hsa00510	N-Glycan biosynthesis	47	0.39298	1.56216	0.0136573	0.0355302	0.020441	6559	tags=51%, list=26%, signal=38%	79053/4122/85365/2683/6480/57134/4121/4124/79868/57171/201595/29929/10195/6185/440138/79796/10905/23193/79644/4248/56052/8704/29880/4249
hsa04392	Hippo signaling pathway - multiple species	25	-0.487186	-1.60907	0.0150757	0.038845	0.022348	3070	tags=36%, list=12%, signal=32%	26524/83937/11186/9770/5058/1454/8463/126374/25937
hsa04659	Th17 cell differentiation	107	-0.323928	-1.46777	0.0151647	0.038845	0.022348	5225	tags=36%, list=21%, signal=29%	7040/4794/59067/3118/5533/3117/3662/3125/3560/3559/3119/3326/3460/3932/3594/6776/919/50615/5914/3561/27040/5532/916/9466/3112/5603/5335/3113/3122/3109/5595/3108/915/3115/6772/7535/5602/3111/917
hsa05163	Human cytomegalovirus infection	218	-0.273351	-1.38784	0.0160294	0.0407465	0.023442	3688	tags=24%, list=15%, signal=21%	5330/3446/3265/94235/2787/567/5296/842/196883/6376/4776/6347/387/808/3588/7188/3133/3685/2782/2793/7186/3445/2768/3587/5731/6714/111/5293/5532/581/6892/2791/5879/6387/6890/64764/8717/3105/5603/1019/6352/1029/1870/109/5595/2771/7852/3710/3106/5156/5880/3134
hsa00860	Porphyrin metabolism	39	0.406924	1.54184	0.0166049	0.0418897	0.0240997	4628	tags=38%, list=18%, signal=31%	2395/3052/645/124454/7363/7364/54659/211/3145/1356/54657/210/10720/54577/2235
hsa00010	Glycolysis / Gluconeogenesis	64	0.356163	1.51004	0.0173924	0.0434676	0.0250074	5122	tags=44%, list=20%, signal=35%	501/9562/2203/2027/126/8789/5224/229/5236/217/3939/5313/130/3101/5105/128/57818/125/3099/55276/26330/127/5162/124/1738/223/5106/5161
hsa04390	Hippo signaling pathway	150	-0.293249	-1.41117	0.0174914	0.0434676	0.0250074	4449	tags=27%, list=18%, signal=23%	7484/8324/81029/60/1741/5499/8325/5500/392255/7533/5521/7976/26524/11186/653/84552/7534/71/657/3996/8313/1495/8321/1856/1454/3689/8463/80326/126374/652/650/85409/7042/2736/2535/25937/896/5518/54361/894/51176
hsa04020	Calcium signaling pathway	231	-0.269235	-1.36902	0.0181306	0.0447222	0.0257292	5765	tags=33%, list=23%, signal=26%	7419/6261/5026/2252/4915/5023/84812/8822/805/624/146/5153/7134/778/3360/3357/4803/9630/3706/5533/5724/845/818/7201/26281/113026/56034/5737/2778/5025/2905/153/5330/57620/7423/8911/952/5333/196883/5021/2254/5154/10800/808/3082/553/8877/2263/4486/3707/2769/80228/9965/255231/5731/55283/5532/3270/775/57172/489/51196/1910/2064/5335/109/5136/135/7852/3710/5156/1909/7424/5155/5159/80310/2261
hsa04962	Vasopressin-regulated water reabsorption	44	-0.393525	-1.50635	0.0183276	0.0448758	0.0258176	4809	tags=34%, list=19%, signal=28%	112/396/2778/554/5869/79659/6810/8655/8766/1781/64764/10540/397/109/6844
hsa05322	Systemic lupus erythematosus	52	-0.381224	-1.5158	0.0190087	0.0462035	0.0265815	2733	tags=35%, list=11%, signal=31%	942/958/6628/712/1511/959/713/6737/3112/81/940/3113/3122/3109/3108/3115/3111/730
hsa04371	Apelin signaling pathway	127	-0.297225	-1.3944	0.0193243	0.0466304	0.026827	3821	tags=25%, list=15%, signal=21%	22800/5330/3265/94235/2787/196883/8862/808/8877/2782/2793/59/8678/4634/6548/111/10365/4854/2791/22808/182/6696/4208/6194/109/5595/4209/2771/5294/3710/6237/5327
hsa04625	C-type lectin receptor signaling pathway	104	-0.314826	-1.41421	0.0194856	0.0466813	0.0268563	3995	tags=29%, list=16%, signal=24%	4046/5971/22800/6367/3265/5296/3592/4791/4776/114548/387/808/5058/64170/29108/6714/5293/5532/6850/5580/22808/5603/10379/834/5595/9641/3710/6772/5602/6237
