# Supplementary material for: Exploring key biomarkers of liver fibrosis progression to hepatocellular carcinoma based on immune cell-related genes
Source: Research Square preprint supplement (doi:10.21203/rs.3.rs-6479983/v1), 2025-05-21
Supplement: Supplementary file 8 [file 9f4ca3e8fb8bf9445b3ecd42.xlsx]

## Sheet: KEGG_mRNA
	ID	Description	GeneRatio	BgRatio	pvalue	p.adjust	qvalue	geneID	Count
hsa04979	hsa04979	Cholesterol metabolism	44974	51/8292	0.00475516	0.00475516	0.149947	1071/3931	2
hsa05204	hsa05204	Chemical carcinogenesis - DNA adducts	44974	69/8292	0.00856213	0.00856213	0.149947	10/1544	2
hsa04610	hsa04610	Complement and coagulation cascades	44974	86/8292	0.0130699	0.0130699	0.149947	2160/735	2
hsa05146	hsa05146	Amoebiasis	44974	102/8292	0.0180692	0.0180692	0.149947	1277/735	2
hsa04625	hsa04625	C-type lectin receptor signaling pathway	44974	104/8292	0.0187433	0.0187433	0.149947	10332/51266	2
hsa00120	hsa00120	Primary bile acid biosynthesis	44943	17/8292	0.0343196	0.0343196	0.216673	51302	1
hsa04145	hsa04145	Phagosome	44974	152/8292	0.0379179	0.0379179	0.216673	10332/8685	2
hsa04630	hsa04630	JAK-STAT signaling pathway	44974	166/8292	0.0444994	0.0444994	0.222497	4170/8835	2
hsa00650	hsa00650	Butanoate metabolism	44943	27/8292	0.0539866	0.0539866	0.235844	6296	1
hsa00591	hsa00591	Linoleic acid metabolism	44943	30/8292	0.0598128	0.0598128	0.235844	1544	1
hsa05205	hsa05205	Proteoglycans in cancer	44974	205/8292	0.0648572	0.0648572	0.235844	2719/1277	2
hsa01250	hsa01250	Biosynthesis of nucleotide sugars	44943	37/8292	0.0732761	0.0732761	0.244254	10020	1
hsa00380	hsa00380	Tryptophan metabolism	44943	42/8292	0.0827815	0.0827815	0.254712	1544	1
hsa04930	hsa04930	Type II diabetes mellitus	44943	46/8292	0.0903196	0.0903196	0.255826	8835	1
hsa00520	hsa00520	Amino sugar and nucleotide sugar metabolism	44943	49/8292	0.0959349	0.0959349	0.255826	10020	1
hsa00140	hsa00140	Steroid hormone biosynthesis	44943	62/8292	0.119893	0.119893	0.28385	1544	1
hsa00830	hsa00830	Retinol metabolism	44943	68/8292	0.130748	0.130748	0.28385	1544	1
hsa04917	hsa04917	Prolactin signaling pathway	44943	70/8292	0.134338	0.134338	0.28385	8835	1
hsa00982	hsa00982	Drug metabolism - cytochrome P450	44943	72/8292	0.137914	0.137914	0.28385	1544	1
hsa00980	hsa00980	Metabolism of xenobiotics by cytochrome P450	44943	78/8292	0.14856	0.14856	0.28385	1544	1
hsa00983	hsa00983	Drug metabolism - other enzymes	44943	80/8292	0.152081	0.152081	0.28385	10	1
hsa04151	hsa04151	PI3K-Akt signaling pathway	44974	354/8292	0.162489	0.162489	0.28385	1277/4170	2
hsa04512	hsa04512	ECM-receptor interaction	44943	88/8292	0.166028	0.166028	0.28385	1277	1
hsa01522	hsa01522	Endocrine resistance	44943	98/8292	0.183158	0.183158	0.28385	9611	1
hsa00564	hsa00564	Glycerophospholipid metabolism	44943	99/8292	0.184853	0.184853	0.28385	3931	1
hsa04933	hsa04933	AGE-RAGE signaling pathway in diabetic complications	44943	100/8292	0.186544	0.186544	0.28385	1277	1
hsa04974	hsa04974	Protein digestion and absorption	44943	103/8292	0.191599	0.191599	0.28385	1277	1
hsa04935	hsa04935	Growth hormone synthesis, secretion and action	44943	120/8292	0.219686	0.219686	0.285703	8835	1
hsa04919	hsa04919	Thyroid hormone signaling pathway	44943	121/8292	0.221309	0.221309	0.285703	9611	1
hsa04611	hsa04611	Platelet activation	44943	124/8292	0.22616	0.22616	0.285703	1277	1
hsa04926	hsa04926	Relaxin signaling pathway	44943	129/8292	0.234182	0.234182	0.285703	1277	1
hsa04210	hsa04210	Apoptosis	44943	136/8292	0.24528	0.24528	0.285703	4170	1
hsa05322	hsa05322	Systemic lupus erythematosus	44943	136/8292	0.24528	0.24528	0.285703	735	1
hsa04910	hsa04910	Insulin signaling pathway	44943	137/8292	0.246853	0.246853	0.285703	8835	1
hsa05162	hsa05162	Measles	44943	139/8292	0.24999	0.24999	0.285703	10332	1
hsa05152	hsa05152	Tuberculosis	44943	180/8292	0.311651	0.311651	0.346279	10332	1
hsa05202	hsa05202	Transcriptional misregulation in cancer	44943	193/8292	0.330184	0.330184	0.352942	9611	1
hsa04510	hsa04510	Focal adhesion	44943	203/8292	0.344119	0.344119	0.352942	1277	1
hsa05415	hsa05415	Diabetic cardiomyopathy	44943	203/8292	0.344119	0.344119	0.352942	1277	1
hsa05207	hsa05207	Chemical carcinogenesis - receptor activation	44943	212/8292	0.356427	0.356427	0.356283	1544	1
hsa05208	hsa05208	Chemical carcinogenesis - reactive oxygen species	44943	223/8292	0.371175	0.371175	0.356283	1544	1
hsa04810	hsa04810	Regulation of actin cytoskeleton	44943	229/8292	0.379084	0.379084	0.356283	735	1
hsa05171	hsa05171	Coronavirus disease - COVID-19	44943	232/8292	0.383004	0.383004	0.356283	735	1
hsa05020	hsa05020	Prion disease	44943	273/8292	0.434291	0.434291	0.39481	735	1
hsa05206	hsa05206	MicroRNAs in cancer	44943	310/8292	0.477105	0.477105	0.424094	4170	1
hsa05165	hsa05165	Human papillomavirus infection	44943	331/8292	0.500029	0.500029	0.434808	1277	1
