# Supplementary material for: Exploring key biomarkers of liver fibrosis progression to hepatocellular carcinoma based on immune cell-related genes
Source: Research Square preprint supplement (doi:10.21203/rs.3.rs-6479983/v1), 2025-05-21
Supplement: Supplementary file 9 [file a091fe51d6d7222bbebca8fc.xlsx]

## Sheet: Com_DEGs
	x
1	GPC3
2	COL1A1
3	LYVE1
4	CLEC4M
5	CETP
6	TTC36
7	KBTBD11
8	LOC143941
9	C3orf28
10	LCAT
11	CLEC4G
12	HSD17B13
13	C5orf33
14	GNE
15	ACSM3
16	DNAJC12
17	GPR128
18	CLEC1B
19	NCOR1
20	NAT2
21	LOC653498
22	C10orf65
23	F11
24	DNASE1L3
25	MCL1
26	CYP1A2
27	C9
28	SOCS2
29	MARCO
30	CYP39A1
