# Supplementary material for: Exploring key biomarkers of liver fibrosis progression to hepatocellular carcinoma based on immune cell-related genes
Source: Research Square preprint supplement (doi:10.21203/rs.3.rs-6479983/v1), 2025-05-21
Supplement: Supplementary file 10 [file b0485b35976b8c77cad9b516.xlsx]

## Sheet: MCL1.KEGGgsea
ID	Description	setSize	enrichmentScore	NES	pvalue	p.adjust	qvalue	rank	leading_edge	core_enrichment
hsa04610	Complement and coagulation cascades	84	0.686082	3.18759	1e-10	1.75263e-09	9.58449e-10	3532	tags=52%, list=14%, signal=45%	715/730/7056/1604/2/710/728/1675/5054/3426/716/713/11326/5329/735/718/719/1191/714/729/2152/712/3078/2158/2149/722/2160/4153/1378/10544/10747/10878/3689/5055/3080/733/5627/720/725/5327/2162/721/3684/1361
hsa05332	Graft-versus-host disease	41	0.724495	2.85978	1e-10	1.75263e-09	9.58449e-10	5683	tags=78%, list=23%, signal=61%	3569/942/3553/3133/3134/3106/3125/355/3002/3117/3821/3113/3824/5551/3107/3119/3115/3122/3111/3126/3804/940/7124/3109/115653/941/3112/3458/3812/3105/57292/356
hsa04640	Hematopoietic cell lineage	95	0.594163	2.81867	1e-10	1.75263e-09	9.58449e-10	4326	tags=53%, list=17%, signal=44%	1604/3569/4311/912/3575/3553/925/1436/960/7850/951/3676/3554/3125/915/920/914/3117/928/921/3113/917/916/929/3565/3119/931/3115/3122/2322/3111/1378/3126/945/3568/3675/911/913/1441/3589/7124/3684/3109/3574/952/2811/2209/2056/3112/2208
hsa04061	Viral protein interaction with cytokine and cytokine receptor	91	0.590037	2.77727	1e-10	1.75263e-09	9.58449e-10	5064	tags=54%, list=20%, signal=43%	6347/6363/3572/6366/3569/6387/9547/7852/1436/7133/8807/6372/3587/1230/8809/6352/9560/1236/6368/7132/2920/388372/414062/729230/3560/3588/643/2833/3561/6349/6359/4283/10803/4055/6369/8793/2919/1233/6348/7124/8797/6362/6367/2921/1232/6361/6360/3627/5196
hsa05150	Staphylococcus aureus infection	89	0.587953	2.75768	1e-10	1.75263e-09	9.58449e-10	4257	tags=52%, list=17%, signal=43%	2357/2358/715/2212/728/1675/3426/716/713/718/2359/719/6403/3125/714/3117/712/6404/2215/3113/820/5724/1667/1668/3119/3115/4153/3122/25984/3111/2213/3383/3882/3126/10747/3689/8688/720/721/3684/3109/3075/1669/2209/1828/3112
hsa05171	Coronavirus disease - COVID-19	219	0.509514	2.753	1e-10	1.75263e-09	9.58449e-10	3863	tags=41%, list=15%, signal=35%	6347/2353/715/730/3725/2212/3572/3569/3716/728/64135/3553/4939/1675/114548/7099/716/4615/6189/6194/713/4938/6129/5336/7132/735/718/719/6403/6154/1839/714/10379/729/1536/6137/9349/834/6224/7098/4599/6774/712/51311/7189/6130/6160/7097/5970/185/6234/6207/5602/4153/6232/6125/3593/6168/4600/9045/25873/6850/3455/6144/10747/59272/6133/23521/6205/6136/6157/6122/733/6146/6210/720/6233/4790/7124/2162/4793/…
hsa04380	Osteoclast differentiation	124	0.558176	2.75047	1e-10	1.75263e-09	9.58449e-10	4330	tags=51%, list=17%, signal=42%	9021/3726/2354/2353/3725/4982/2212/3716/353514/695/2534/3553/1436/653361/5604/8600/2274/1540/4772/5533/5336/7132/3554/10990/10288/23547/10379/3459/5530/5609/8651/7305/3937/7048/7189/2355/5970/2215/55423/4689/11027/8061/5602/11025/2213/4688/3727/6850/3455/1513/6688/4790/140885/7124/11006/6772/5293/3932/3456/5532/2209/5599/3458
hsa05140	Leishmaniasis	71	0.615145	2.74035	1e-10	1.75263e-09	9.58449e-10	4330	tags=59%, list=17%, signal=49%	2353/5743/3725/2212/3716/3553/653361/7099/4615/3717/3676/718/3125/1536/3459/7043/3117/7189/7097/5970/2215/3113/4689/3565/3119/3115/3122/3593/3111/1378/4688/3126/3689/4790/7124/4793/3684/3109/6772/2209/3112/3458
hsa05321	Inflammatory bowel disease	65	0.624266	2.73841	1e-10	1.75263e-09	9.58449e-10	4330	tags=60%, list=17%, signal=50%	3725/3569/3553/7099/8807/8809/4772/3594/3125/4094/6775/3459/7043/3117/6774/3596/7097/5970/3113/3565/3119/3561/3115/3122/3593/3111/2625/3126/51561/6095/59067/4790/7124/3109/6772/64127/50615/3112/3458
hsa04672	Intestinal immune network for IgA production	47	0.66806	2.71684	1e-10	1.75263e-09	9.58449e-10	2801	tags=55%, list=11%, signal=49%	3569/942/6387/7852/10673/3676/3600/3125/608/3117/23495/3601/3113/8741/3565/3119/3115/3122/959/29851/3111/3695/10803/4055/3126/940
hsa05323	Rheumatoid arthritis	90	0.573851	2.69228	1e-10	1.75263e-09	9.58449e-10	4380	tags=53%, list=17%, signal=44%	6347/2353/3725/3569/942/6387/7010/3553/10673/7099/8600/6372/6352/3600/2920/3125/7043/3117/414062/7097/3113/8741/3119/3115/3122/3111/3383/6349/3126/1513/51561/940/5741/2919/1493/51606/3689/6348/3589/7124/3109/284/4314/4050/941/3112/3458/2921
hsa04060	Cytokine-cytokine receptor interaction	277	0.480957	2.66766	1e-10	1.75263e-09	9.58449e-10	4380	tags=40%, list=17%, signal=33%	6347/9173/4982/6363/3572/6366/3977/3569/6387/9547/3575/7852/3553/10673/51330/654/1436/7133/2658/939/8807/92/8600/6372/4804/3587/1230/8809/6352/9560/90865/1236/3594/7850/6368/7132/3554/10148/3600/2920/388372/3556/653/269/608/355/920/3459/8742/7043/943/659/10663/23495/7048/9180/3601/3596/414062/729230/3560/3588/8741/3557/3603/643/2833/3565/3561/959/3593/6349/6359/4283/10803/4055/23529/94/3455/3568/…
hsa00830	Retinol metabolism	63	0.615229	2.66528	1e-10	1.75263e-09	9.58449e-10	3698	tags=54%, list=15%, signal=46%	1544/316/54658/220/54657/1576/125/1592/128/126/54884/127/5959/1562/1559/54577/1555/130/7366/1549/9227/124/54575/8228/1543/54905/1558/1548/10170/1551/7365/8608/54659/54600
hsa04659	Th17 cell differentiation	107	0.524232	2.52535	1e-10	1.75263e-09	9.58449e-10	4330	tags=50%, list=17%, signal=41%	2353/3725/3572/3569/3716/5588/3091/3553/3662/4772/5533/3717/3594/3554/10148/3556/3125/915/920/3459/5530/3117/6774/7048/919/3560/5970/3113/917/916/3565/3119/3561/5602/3115/3122/3111/7535/2625/3126/51561/6095/59067/4790/4793/3109/6772/3932/5532/50615/3112/5599/3458
hsa04514	Cell adhesion molecules	147	0.484157	2.47888	1e-10	1.75263e-09	9.58449e-10	4393	tags=41%, list=17%, signal=34%	942/10666/6402/3133/925/5010/6401/57689/3676/3134/3680/9071/3106/6403/3125/3385/5788/920/4684/914/3117/6404/923/79679/3113/3107/3119/3115/5175/965/6614/3122/80380/959/29851/3111/3383/3695/3126/940/4756/1002/1462/1493/3689/58494/5789/3684/3109/22829/9378/941/83700/84628/4685/4359/49861/3112/1366/9073/23562
hsa04668	TNF signaling pathway	108	0.510844	2.47254	1e-10	1.75263e-09	9.58449e-10	5254	tags=51%, list=21%, signal=40%	9021/3726/6347/2353/5743/3725/3569/3659/3553/7133/5604/6372/6401/8809/6352/1540/7132/1906/3600/2920/355/602/197259/5609/8717/6416/5970/1326/5602/5606/841/329/3383/2919/9586/7128/4790/7124/5293/64127/3456/4314/8986/5599/3976/8772/2921/11035/8837/7424/8503/3627/3551/1051/843
hsa03013	Nucleocytoplasmic transport	95	-0.57712	-2.43252	1e-10	1.75263e-09	9.58449e-10	2720	tags=47%, list=11%, signal=42%	11260/3840/9775/64328/55705/4686/10762/57187/6612/3837/7329/55746/5905/5976/65110/10921/9972/65109/22794/59343/9670/23225/8086/23214/23511/23534/23165/22985/9883/8480/57122/25909/79023/79228/79902/1434/8021/8563/51194/57510/9631/348995/26019/7514/9984
hsa04110	Cell cycle	140	-0.51607	-2.33365	1e-10	1.75263e-09	9.58449e-10	4971	tags=52%, list=20%, signal=42%	10274/55869/1869/1017/3065/10971/25/545/64682/2932/7027/80174/4088/51434/5518/25836/11200/5591/7709/27127/8243/1871/9088/2810/27085/993/8317/51343/5933/4175/1029/1019/1111/1387/4173/994/995/5515/9319/1663/4176/51433/4085/5528/699/51529/9232/26271/4193/9700/5525/1870/7272/4172/4087/891/991/898/990/81620/890/29945/113130/6502/4174/9212/10403/4171/29882/9133/9134/8697/23244
hsa04621	NOD-like receptor signaling pathway	168	0.440538	2.30916	1e-10	1.75263e-09	9.58449e-10	4982	tags=41%, list=20%, signal=33%	6347/81631/3725/10135/3569/837/3716/3665/118429/3428/63940/3553/4939/114548/7099/4615/6352/23710/10628/4938/2633/2920/11345/10379/1536/10010/6041/596/834/84168/7189/115362/5970/820/115361/1667/1668/5602/841/9447/1508/329/3455/11337/2919/24145/199713/7128/5330/4790/7124/9474/4793/6772/64127/3456/1669/388646/5599/8772/2921/11035/9051/5586/64170/91662/148022/3551/1535
hsa04658	Th1 and Th2 cell differentiation	92	0.530627	2.49504	1.49198e-10	2.48414e-09	1.35848e-09	4330	tags=50%, list=17%, signal=42%	2353/3725/3716/5588/864/4772/5533/3717/3594/3125/915/4094/920/6775/3459/5530/3117/919/3596/3560/5970/3113/917/916/3565/3119/3561/5602/3115/84441/3122/3593/3111/7535/2625/3126/4790/4793/3109/6772/3932/5532/11317/3112/5599/3458
hsa03040	Spliceosome	106	-0.541813	-2.33739	1.67624e-10	2.65804e-09	1.45359e-09	3804	tags=44%, list=15%, signal=38%	84950/8896/9775/6633/10262/22827/84991/27339/6629/4686/2521/6627/6631/6628/9128/10915/57187/6100/10523/6634/6636/8449/51340/11338/151903/8175/3192/25766/57819/6635/10992/51645/10946/9129/9716/55696/11325/26121/22985/6637/9343/25804/6626/1659/10713/9984/9416
hsa03030	DNA replication	35	-0.738725	-2.5985	2.56552e-10	3.75152e-09	2.05157e-09	4037	tags=71%, list=16%, signal=60%	5558/54107/10714/5557/5426/29935/246243/4175/10535/1763/4173/4176/5983/5427/5985/5984/4172/3978/2237/5981/4174/5424/4171/5422/23649
hsa00982	Drug metabolism - cytochrome P450	66	0.584394	2.56277	2.59114e-10	3.75152e-09	2.05157e-09	3844	tags=52%, list=15%, signal=44%	1544/316/2327/1571/54658/54657/1576/125/128/126/127/2949/2950/9446/2328/2329/2947/1559/54577/2330/1555/130/7366/1549/124/54575/1558/4129/1548/7365/54659/54600/1565/4259
hsa05145	Toxoplasmosis	107	0.488087	2.35122	4.97707e-10	6.90569e-09	3.77646e-09	4330	tags=45%, list=17%, signal=37%	3716/3908/2775/3949/10319/7099/4615/3587/240/3717/7132/3125/596/3459/7043/3117/5294/6774/23643/8651/7189/7097/5970/3588/3113/23533/3119/5602/3115/5606/841/3122/959/3593/3111/329/3126/4790/7124/4793/3109/6772/3306/2773/2771/3112/5599/3458
hsa05322	Systemic lupus erythematosus	52	0.631635	2.64902	8.21737e-10	1.09455e-08	5.9857e-09	4363	tags=63%, list=17%, signal=53%	715/730/2212/942/716/713/735/718/3125/714/729/3117/712/2215/3113/3119/3115/3122/959/3111/3126/940/2904/733/720/7124/721/3109/941/2209/3112/3458/6737
hsa05162	Measles	135	0.448948	2.25316	1.04397e-09	1.32698e-08	7.25674e-09	4366	tags=40%, list=17%, signal=33%	2353/3725/3569/3716/3665/64135/3553/4939/7099/4615/4938/915/595/10379/355/596/10332/4599/6774/6504/8717/7189/9367/7097/3560/5970/9451/917/916/25898/894/3561/5602/841/3593/896/4600/1459/2213/1027/1021/3455/940/7128/4790/4793/6772/5293/3456/868/3306/51284/5599/8772
hsa04630	JAK-STAT signaling pathway	159	0.42576	2.21343	1.07593e-09	1.32698e-08	7.25674e-09	4422	tags=36%, list=18%, signal=30%	4170/9021/3572/5156/3977/3569/3716/8835/4609/3575/316/3587/5292/3717/3594/3600/595/10379/6775/2273/596/3459/10254/6774/8651/9180/116379/3601/3596/3560/3588/894/3565/3561/3593/896/23529/3455/3568/3598/51561/9306/59067/1441/3589/6772/3574/5293/3456/1154/50615/5008/2056/2690/4352/3458/3976/2670
hsa05330	Allograft rejection	37	0.679519	2.65483	1.72765e-09	2.05467e-08	1.12362e-08	4330	tags=68%, list=17%, signal=56%	942/3133/3134/3106/3125/355/3002/3117/3113/5551/3107/3565/3119/3115/3122/959/3593/3111/3126/940/7124/3109/941/3112/3458
hsa04940	Type I diabetes mellitus	43	0.668103	2.67459	1.82925e-09	2.10048e-08	1.14867e-08	4330	tags=58%, list=17%, signal=48%	942/3553/3133/3134/3106/3125/355/5799/3002/3117/3113/5551/3107/3119/3115/3122/3593/3111/3126/940/7124/3109/941/3112/3458
hsa05142	Chagas disease	100	0.497046	2.39367	2.00146e-09	2.22162e-08	1.21492e-08	4976	tags=54%, list=20%, signal=43%	6347/2353/3725/3569/5516/2775/3553/5054/7099/4615/6352/713/9630/7132/718/915/714/355/55844/3459/7043/712/7048/919/7189/6416/414062/7097/5970/917/916/5520/5602/841/3593/2769/6349/107/5330/4790/6348/7124/5293/3456/2773/2771/5599/3458/8772/8837/8503/148022/10333/3551
hsa05164	Influenza A	161	0.417133	2.17328	2.21918e-09	2.38383e-08	1.30363e-08	4366	tags=38%, list=17%, signal=32%	9021/6347/3569/3716/3665/64135/3553/4939/114548/7099/4615/5604/6352/4938/3717/90865/7132/3125/10379/355/6041/3459/834/3337/7098/3117/4599/8717/91543/5970/3113/3119/3115/841/3122/3593/896/3111/4600/3383/1021/3126/3455/291/4790/10241/7124/4793/7177/8797/9230/3109/6772/5293/7113/3456/71/3112/51284/3458/8772
hsa04062	Chemokine signaling pathway	184	0.396469	2.09816	4.0013e-09	4.16385e-08	2.27706e-08	5064	tags=45%, list=20%, signal=36%	1398/6347/6363/6366/6387/9547/7852/3702/653361/5604/6372/55970/1230/6352/9560/3717/1236/6368/5336/2920/388372/2869/10235/4067/1794/2268/5880/10663/5294/6774/3845/7454/414062/54331/729230/5970/5567/23533/643/2833/25759/6349/6359/4283/10803/53358/6369/3055/107/2919/1233/998/2185/131890/5330/4790/2791/6348/4793/6772/5293/5906/409/6362/108/2773/6367/2771/2921/2790/6093/2787/1232/2931/2309/109/8503/63…
hsa05169	Epstein-Barr virus infection	196	0.386259	2.07392	4.15935e-09	4.19716e-08	2.29527e-08	4366	tags=38%, list=17%, signal=31%	3725/3569/3716/3665/4609/695/567/864/3133/4939/4616/4615/960/8819/4938/5336/3134/3106/3125/915/3280/595/10379/355/4067/596/5609/3117/6774/8717/919/7189/6416/7097/5970/3113/917/916/7431/894/3107/3119/5602/3115/965/5606/841/3122/896/3111/1027/3383/1021/5925/3126/6850/3455/5713/22938/7128/956/4790/7124/4793/3109/6772/5293/377841/3456/11317/3112/5599/2208/8772
hsa05167	Kaposi sarcoma-associated herpesvirus infection	187	0.395162	2.1115	4.36023e-09	4.27047e-08	2.33536e-08	3278	tags=33%, list=13%, signal=29%	7538/2353/81631/5743/3725/3572/3569/3716/3665/942/4609/3091/3133/9976/1827/5604/55970/1230/4772/5533/3717/5336/7132/3134/718/3106/2920/595/10379/355/4067/3459/5530/5609/2247/7098/5294/6774/3845/7314/8717/6416/54331/5970/23533/3107/5602/841/3383/5289/1021/5925/6850/3455/3055/2919/1233/801/6233/4790/2791
hsa05204	Chemical carcinogenesis - DNA adducts	65	0.564009	2.47408	4.83499e-09	4.60015e-08	2.51565e-08	4917	tags=49%, list=20%, signal=40%	5743/1544/10/3290/1571/54658/54657/1576/1545/2949/2950/9446/1562/2947/1559/54577/7366/1549/54575/1543/1558/1548/1551/7365/9/54659/54600/4259/64816/4257/7367/1577
hsa05417	Lipid and atherosclerosis	211	0.375565	2.01935	5.14681e-09	4.7608e-08	2.60351e-08	4982	tags=39%, list=20%, signal=31%	6347/2353/4780/3725/3569/3665/3949/3553/653361/114548/7099/4615/6401/6352/4772/5533/3717/7132/2920/6403/355/1536/4067/10010/596/834/839/5530/5609/4846/6774/3845/23643/7189/6416/414062/7097/5970/9451/1559/1555/4689/929/5602/5606/841/959/3593/3383/6349/1549/6648/4688/1543/2919/998/801/1558/1548/5330/4790/6348/7124/1573/5452/8797/5293/5906/3456/5532/4314/3306/3929/5599/2921/91860/8503/7436/148022/10…
hsa05152	Tuberculosis	177	0.393432	2.07586	7.80824e-09	7.02742e-08	3.84303e-08	4436	tags=40%, list=18%, signal=33%	2212/3569/3716/3553/10892/7099/4615/3587/5533/3717/7132/718/1520/3125/596/3459/7043/3920/5530/10332/8915/7096/3117/8717/2207/7189/972/7097/64581/5970/3588/9902/2215/3113/11151/820/929/3119/5602/3115/841/3122/3593/3111/2213/5289/1378/3126/6850/51561/51606/3689/801/5868/4790/7124/3684/3109/7421/6772/1263/64127/3456/5532/3929/2209/3112/5599/3458/8772/22925
hsa04620	Toll-like receptor signaling pathway	101	0.479842	2.29966	1.19169e-08	1.0443e-07	5.71087e-08	5931	tags=53%, list=24%, signal=41%	2353/3725/3569/3665/942/3553/7099/4615/5604/6352/9560/388372/5609/7098/7096/23643/51311/7189/6416/414062/7097/5970/929/1326/5602/5606/841/3593/6349/4283/3455/1513/4790/6348/7124/6772/5293/3456/941/3929/51284/5599/8772/8503/148022/10333/3627/3551/54106/6373/10000/7100/1432/3451
hsa04064	NF-kappa B signaling pathway	95	0.48731	2.31176	1.90726e-08	1.6285e-07	8.90567e-08	4468	tags=48%, list=18%, signal=40%	5743/6363/6366/5588/6387/695/3553/10673/4616/10892/7099/4615/8600/1540/9560/5336/7132/3554/2920/388372/4067/596/8915/23643/8717/7189/5970/929/959/84433/1459/329/3383/7535/4055/6850/2919/7128/4790/7124/472/3932/4050/3929/2921/8837
hsa00380	Tryptophan metabolism	37	0.647079	2.52809	2.63968e-08	2.19754e-07	1.20175e-07	3360	tags=54%, list=13%, signal=47%	11185/1544/316/51166/2639/1545/8942/6999/219/64577/847/1738/217/1962/1543/38/8564/223/4129/224
hsa00980	Metabolism of xenobiotics by cytochrome P450	71	0.530918	2.36513	3.98965e-08	3.24037e-07	1.77204e-07	4949	tags=49%, list=20%, signal=40%	22977/1544/3290/1571/54658/54657/1576/1545/125/128/126/127/2949/2950/9446/2947/1559/54577/1555/130/7366/1549/124/54575/1543/1548/7365/54659/54600/1565/4259/4257/7367/1577/29785
hsa04662	B cell receptor signaling pathway	81	0.487183	2.23082	4.47882e-08	3.55107e-07	1.94195e-07	3434	tags=43%, list=14%, signal=37%	2353/3725/975/353514/695/10892/5604/4772/5533/973/8519/5336/10990/10288/55024/118788/23547/4067/3635/5880/5530/8915/3845/640/5970/11027/84433/11025/2213/6850/971/4790/11006/4793/974
hsa05320	Autoimmune thyroid disease	52	0.573187	2.4039	1.54553e-07	1.19688e-06	6.54531e-07	4257	tags=44%, list=17%, signal=37%	942/3133/3134/3106/3125/355/3002/3117/3113/5551/3107/3565/3119/3115/3122/959/3111/3126/940/1493/3109/941/3112
hsa05133	Pertussis	74	0.496062	2.22867	2.42926e-07	1.83851e-06	1.00541e-06	3496	tags=46%, list=14%, signal=40%	2353/715/3725/3569/710/3659/3553/114548/7099/716/4615/6372/713/718/714/834/23643/712/7189/5970/722/929/5602/3593/3394/51561/3689/801/720/4790/725/7124/721/3684
hsa04145	Phagosome	147	0.384301	1.96761	3.58167e-07	2.65044e-06	1.44943e-06	3577	tags=34%, list=14%, signal=29%	715/2212/7057/3133/78989/8417/653361/7099/8685/3134/718/3106/1520/84617/3125/6441/1536/3920/83547/10332/3117/4481/7097/64581/9902/2215/3113/11151/4689/929/3107/23673/3119/3115/4153/3122/3111/2213/5289/4688/79659/3126/9341/51606/338382/3689/5868/7058/3684/3109
hsa05144	Malaria	45	0.593515	2.40538	3.86014e-07	2.79441e-06	1.52816e-06	5655	tags=60%, list=22%, signal=47%	6347/975/3569/7057/3553/7099/4615/6401/3820/6403/2995/7043/7097/5175/959/3383/1378/3689/3082/7124/7058/3458/3040/54106/4035/3043/7042
hsa04936	Alcoholic liver disease	136	0.406379	2.04252	4.30033e-07	3.04683e-06	1.6662e-06	4978	tags=43%, list=20%, signal=34%	3569/728/3553/23417/7099/2308/4615/1571/713/7132/718/719/2920/714/125/128/595/355/126/219/127/5609/23643/712/8717/7189/6416/5970/929/5602/130/5606/841/3593/217/124/8310/223/79966/2919/37/720/4790/7124/224/721/51/3456/3929/5599/8772/2921/2309/23411/148022/34/3551/23765
hsa03410	Base excision repair	32	-0.664809	-2.25493	6.61705e-07	4.59058e-06	2.51042e-06	4736	tags=62%, list=19%, signal=51%	55247/27301/27343/54107/8930/4595/10714/7515/5426/328/142/23583/7374/5427/3978/2237/5424/6996/3980/10038
hsa05416	Viral myocarditis	59	0.524244	2.23007	9.12424e-07	6.20076e-06	3.39096e-06	4498	tags=58%, list=18%, signal=47%	1604/942/3908/2534/3133/3134/3106/3125/595/5880/3117/6442/3113/5551/3107/3119/3115/841/3122/959/3111/3383/27/3126/6444/940/3689/3109/6443/71/941/3112/857/4624
hsa05235	PD-L1 expression and PD-1 checkpoint pathway in cancer	87	0.444132	2.08089	2.12348e-06	1.41424e-05	7.73394e-06	3932	tags=44%, list=16%, signal=37%	2353/3725/3716/5588/3091/7099/4615/5604/55509/4772/5533/3717/10125/915/10538/920/3459/5530/6774/3845/919/7189/7097/5970/917/916/5606/1459/7535/116071/940/4790/4793/5728/6772/5293/3932/5532
hsa04650	Natural killer cell mediated cytotoxicity	127	0.387709	1.93691	2.40344e-06	1.5693e-05	8.58193e-06	5931	tags=46%, list=24%, signal=35%	2534/3133/5604/962/4772/5533/5336/3106/355/3002/3459/5880/5530/4068/3821/3845/7305/3937/919/2207/10870/2215/3824/5551/3823/3107/25759/3383/7535/53358/6850/3455/3804/3808/3689/2185/79465/7124/8797/5293/3932/3456/5532/115653/100507436/3458/3822/8503/7462/3812/117157/3105/3384/57292/356/51744/7409/3451
hsa03440	Homologous recombination	33	-0.648196	-2.22104	2.65759e-06	1.70188e-05	9.30694e-06	5532	tags=67%, list=22%, signal=52%	83990/11073/5893/80198/5932/7516/5889/8438/10714/146956/51720/7156/25788/29935/79728/10111/672/580/5424/8940/7517/641
hsa04217	Necroptosis	128	0.391155	1.95803	2.88071e-06	1.80995e-05	9.89796e-06	4468	tags=34%, list=18%, signal=28%	124044/3716/81030/3553/114548/7099/1540/3717/90865/7132/51510/824/10379/355/1536/6775/596/3459/834/197259/7098/6774/8717/6609/9525/5602/841/2495/92421/329/3455/291/7128/7124/8797/6772/3456/27183/57132/5599/3458/8772/11035/8837
hsa00071	Fatty acid degradation	41	0.572157	2.25846	2.93726e-06	1.81131e-05	9.90536e-06	3990	tags=56%, list=16%, signal=47%	2639/125/128/33/126/219/127/113612/10449/130/51703/1376/217/124/1962/38/8310/223/37/2180/224/51/30
hsa04625	C-type lectin receptor signaling pathway	104	0.411724	1.99628	3.46974e-06	2.10077e-05	1.14883e-05	5951	tags=51%, list=24%, signal=39%	1959/5743/3725/3569/3659/3553/10892/114548/1540/4772/5533/51266/5336/10379/602/1960/834/5530/10332/8915/3845/22800/2207/64581/5970/5602/841/3593/6850/51561/801/4790/7124/6772/1263/5293/868/5532/6237/6367/5599/91860/64170/8503/6361/3551/51806/10000/30835/387/1432/805/3708
hsa05310	Asthma	30	0.627821	2.33966	4.87289e-06	2.89763e-05	1.58461e-05	4257	tags=60%, list=17%, signal=50%	3125/2205/3117/2207/3596/3113/3565/3119/3115/3122/959/3111/5553/3126/8288/7124/3109/3112
hsa03430	Mismatch repair	22	-0.698702	-2.15471	6.70566e-06	3.91752e-05	2.14234e-05	5908	tags=77%, list=23%, signal=59%	5111/4292/5982/5395/27030/10714/4437/29935/4436/9156/5983/5985/5984/3978/2956/5981/5424
hsa04120	Ubiquitin mediated proteolysis	132	-0.427231	-1.90798	7.52147e-06	4.31836e-05	2.36155e-05	4347	tags=40%, list=17%, signal=33%	1161/90293/51366/23221/64682/83737/9820/8450/8945/378884/8925/27339/65264/51434/9616/23291/1642/9690/7322/89910/23295/8453/22954/7329/4591/51343/7332/4734/7337/55070/55585/10401/51433/23327/672/51529/4193/51588/9040/991/389898/29945/6502/29882/10075/7428/8924/23759/11065/10055/8697/55120/63893
hsa04613	Neutrophil extracellular trap formation	101	0.411088	1.97016	8.60721e-06	4.85797e-05	2.65664e-05	5550	tags=49%, list=22%, signal=38%	2357/2358/2212/837/728/23569/653361/7099/5604/5336/718/2359/6403/1536/834/5880/8520/51311/366/6404/7097/64581/5970/2215/820/4689/1378/4688/6850/3689/291/5330/4790/9734/3684/5293/2811/71/2209/51284/1182/8503/27180/1535/2243/10000/4353/2244/1511
hsa05130	Pathogenic Escherichia coli infection	176	0.339486	1.79557	1.08508e-05	6.02219e-05	3.29331e-05	4521	tags=34%, list=18%, signal=28%	2353/3725/2212/3569/837/10672/2534/3553/1902/3059/114548/7099/4615/5010/10427/7132/3554/4542/9071/9871/84617/4651/355/834/8717/10972/7189/10096/23191/5970/2149/7456/5602/841/64005/4643/4430/10802/10095/998/57121/4790/7124/26999/10006/4793/10092/8797/4642/4641/3071/71/49861/5599/1366/9073/8772/23562/6093/4629
hsa04612	Antigen processing and presentation	75	0.450154	2.04028	1.45499e-05	7.9428e-05	4.34362e-05	5128	tags=47%, list=20%, signal=37%	567/3133/925/3134/3106/1520/3125/920/3117/3821/972/3113/3824/3823/3107/3119/3115/3122/3111/1508/5641/3126/3804/3808/3805/7124/3109/115653/3306/3112/3458/8302/3822/3812/3105
hsa00280	Valine, leucine and isoleucine degradation	47	0.517246	2.10351	1.72994e-05	9.29143e-05	5.08114e-05	5117	tags=57%, list=20%, signal=46%	316/219/84693/64064/549/10449/3155/5095/594/1738/217/1962/38/223/593/18/3712/4329/64087/224/54511/30/64902/26275/34/3033/27034
hsa00140	Steroid hormone biosynthesis	58	0.483941	2.06039	2.03461e-05	0.000107544	5.88116e-05	3953	tags=45%, list=16%, signal=38%	1544/3290/1571/54658/54657/1576/1545/3294/51170/6783/54577/6716/51144/6715/7366/54575/7923/1543/412/1312/1551/7365/6718/54659/54600/79644
hsa04151	PI3K-Akt signaling pathway	336	0.27933	1.57	2.14346e-05	0.000111527	6.099e-05	4555	tags=27%, list=18%, signal=23%	4170/5156/1969/3569/5516/3716/4609/3908/7057/56034/7010/3575/10319/4908/1902/1436/3164/7099/5604/55970/4804/6194/3717/3676/3680/118788/7039/595/55844/596/2247/4846/1292/5294/3845/253314/5934/9180/54331/7097/3560/5970/5649/2998/23533/2149/80310/5520/894/3565/3561/2322/8115/896/1027/3695/2250/1021/6850/3455/3675/9586/3694/57121/4915/23678/4790/2791/3082/1441/5105/7058/5728/3574/5293/284/55012/3456/…
hsa03015	mRNA surveillance pathway	86	-0.460304	-1.91351	2.85436e-05	0.000146231	7.99684e-05	5341	tags=47%, list=21%, signal=37%	23435/2733/4116/5501/10914/22916/10767/29894/5522/8189/9775/9887/5518/55339/4686/2521/51692/11052/1479/28227/5976/8731/23381/65110/5515/10921/1478/65109/5523/22794/5528/5525/22985/124540/81608/10898/4440/8732/8106/26019
hsa05166	Human T-cell leukemia virus 1 infection	213	0.310574	1.66195	2.96277e-05	0.000149485	8.17479e-05	3932	tags=33%, list=16%, signal=28%	7538/2353/1958/1959/3725/3569/3716/4609/567/3133/5604/4772/5533/7850/7132/3134/3554/4316/706/3600/3106/3125/2113/915/595/920/7043/5530/3117/3845/7048/10393/3601/6416/3560/5970/5567/3113/917/916/894/3107/3119/3561/8061/5602/3115/3122/896/3111/3383/5925/4055/2114/3126/107/9586/387332/3689/291/6688/4790/7124/472/3109/5728/5293/3932/108/5532
hsa03460	Fanconi anemia pathway	44	-0.552175	-2.01277	3.38629e-05	0.000168304	9.2039e-05	5532	tags=55%, list=22%, signal=43%	83990/4292/5395/80198/2175/545/2178/2187/5889/146956/55215/7156/29935/2177/79728/2189/672/29089/9894/84126/8940/80010/641/55120
hsa00590	Arachidonic acid metabolism	52	0.492779	2.06667	3.54792e-05	0.000173744	9.50139e-05	3610	tags=38%, list=14%, signal=33%	5743/5322/2687/5730/1571/6916/4056/240/8529/5740/113612/1559/1555/10728/5320/81579/1558/5742/1573/2053
hsa04933	AGE-RAGE signaling pathway in diabetic complications	97	0.402519	1.92245	3.76874e-05	0.000181882	9.94647e-05	4776	tags=43%, list=19%, signal=35%	6347/1958/3725/7056/3569/3553/5054/2308/6401/5292/4772/3717/5336/1906/595/1536/596/7043/2152/4846/6774/3845/7048/5970/185/5602/1027/3383/998/5330/4790/7124/6772/5293/1281/1285/1286/5599/4313/7424/8503/6776
hsa04010	MAPK signaling pathway	284	0.289752	1.60748	3.89985e-05	0.000185522	0.000101455	4294	tags=29%, list=17%, signal=24%	1398/2353/3725/5156/1969/4609/56034/7010/3553/4908/1436/4616/3164/4615/1844/5604/55970/4804/4772/5533/7132/3554/3556/10125/1848/7039/355/10235/80824/5880/7043/5530/5609/2247/3845/1847/4149/8717/22800/7048/9064/5494/2872/7189/6416/5970/774/5567/80310/11184/929/1326/93589/5602/5606/2322/2250/3727/27330/6196/84867/998/5922/4915/4790/3082/7124/2316/5906/409/8911/284/5532/6237/3306/3480/3479/8986/8074…
hsa04660	T cell receptor signaling pathway	100	0.395548	1.90487	4.43403e-05	0.000207962	0.000113727	3932	tags=40%, list=16%, signal=34%	2353/3725/5588/2534/3702/925/10892/5604/4772/5533/10125/915/5788/920/5530/5609/8915/3845/3937/919/5970/917/916/1326/3565/5602/959/84433/29851/7535/940/1493/998/4790/7124/4793/5293/3932/868/5532
hsa05418	Fluid shear stress and atherosclerosis	136	0.355709	1.78784	5.46379e-05	0.0002527	0.000138192	5904	tags=43%, list=23%, signal=33%	6347/2353/4780/3725/7056/10365/3553/653361/92/6401/7850/3162/7132/3554/1906/59341/2949/596/5880/659/5609/2950/4846/9446/6416/5970/2947/5602/5175/3383/4688/801/4790/7124/5327/858/5293/4259/90/71/5599/3458/857/4257/4313/91860/8503/3551/1535/51806/3685/10000/387/2944/445/1432/5598/805
hsa05340	Primary immunodeficiency	36	0.538214	2.07015	7.37434e-05	0.000328822	0.000179821	2322	tags=39%, list=9%, signal=35%	695/3575/3543/925/973/915/5788/920/23495/916/3561/959/29851/7535
hsa04657	IL-17 signaling pathway	88	0.398153	1.87803	7.37777e-05	0.000328822	0.000179821	4978	tags=41%, list=20%, signal=33%	2354/6347/2353/5743/3725/3569/6279/3553/6372/2920/6280/8717/7189/3596/5970/29761/3565/8061/5602/841/3727/64806/2919/9618/7128/4790/7124/4314/5599/3458/8772/2921/6361/3627/3551/23765
hsa05135	Yersinia infection	129	0.355337	1.78339	7.40591e-05	0.000328822	0.000179821	4813	tags=36%, list=19%, signal=30%	1398/6347/2353/3725/2212/3569/3553/925/114548/7099/4615/5604/4772/3676/920/834/5880/5609/3937/7454/7189/391/6416/10096/5970/7456/5602/5606/7535/27330/6196/10095/998/2185/4790/7124/10092/5293/3932/3456/71/5599/9815/6093/5586/8503/148022
hsa04611	Platelet activation	114	0.367445	1.78493	8.63904e-05	0.000378526	0.000207002	5951	tags=43%, list=24%, signal=33%	2212/10672/695/64805/2534/6916/5336/5593/10125/10235/4067/4846/5294/6915/3937/2207/5023/5567/23533/2149/8773/4638/6850/107/5330/5742/5293/5906/2811/1281/108/83706/71/2773/2771/6786/6093/109/8503/5500/2814/2243/10000/387/2244/9138/1432/113/3708
hsa00410	beta-Alanine metabolism	30	0.565648	2.10796	9.14079e-05	0.00039531	0.00021618	5547	tags=60%, list=22%, signal=47%	23417/219/84735/1806/51380/217/1962/8310/223/18/4329/224/51/55748/26275/8639/218/35
hsa05163	Human cytomegalovirus infection	218	0.295163	1.59311	0.00011318	0.00048319	0.000264238	4730	tags=32%, list=19%, signal=26%	1398/6347/5743/5732/5734/5156/3569/3716/10672/6387/4609/2775/567/7852/3553/3133/5604/55970/3587/1230/6352/9560/4772/5533/7132/3134/3554/3106/388372/595/355/5880/5530/6774/3845/8717/414062/54331/5970/3588/5567/3107/841/6349/1021/5925/107/9586/2185/801/5330/4790/2791/6348/7124/5293/5731/3456/108/5532/2773/2771/8772/2790/6093/2787/1232/109/91860/8503
hsa04670	Leukocyte transendothelial migration	104	0.364792	1.76872	0.000124052	0.000522905	0.000285957	4982	tags=38%, list=20%, signal=31%	6387/7852/3702/83593/653361/5010/3676/5336/9071/1536/5880/7294/4689/5175/3383/4688/11069/998/3689/2185/58494/3684/7414/5293/10398/5906/6494/71/2773/83700/2771/49861/1366/9073/23562/6093/4313/8503/9075/1535
hsa00860	Porphyrin metabolism	39	0.50275	1.97422	0.000158402	0.000659349	0.000360573	4623	tags=46%, list=18%, signal=38%	2395/54658/54657/3162/211/9843/1356/54577/210/7366/54575/645/7365/54659/54600/3163/1352/7367
hsa05202	Transcriptional misregulation in cancer	166	0.320398	1.67768	0.000165469	0.00068026	0.000372009	4719	tags=36%, list=19%, signal=29%	3569/942/9611/4609/3398/5966/1436/4616/2308/4804/7850/4094/1848/3002/64919/8842/2530/64332/4149/7048/6760/7490/3560/5970/894/929/1667/1668/2322/4005/1027/329/3695/5081/51274/3486/4299/4066/2120/860/6688/4790/8861/5327/3684/472/55589/7113/7102/1669/84444/4314/3480/3479/2209/221037/2892/7704/8900
hsa05146	Amoebiasis	98	0.364345	1.75049	0.000178495	0.000724865	0.000396401	4730	tags=41%, list=19%, signal=33%	3569/3908/912/10319/3553/7099/5272/9630/7850/735/3554/2920/7043/7097/5970/5567/929/3593/2769/107/2919/911/913/338382/3689/733/5868/5330/4790/7124/3684/7414/5293/1281/1285/1286/3458/2921/3913/8503
hsa00350	Tyrosine metabolism	35	0.532801	2.03001	0.000195072	0.000782638	0.000427996	4697	tags=46%, list=19%, signal=37%	316/1621/125/128/126/127/130/6898/124/3242/81889/1312/4129/2954/8639/2184
hsa04216	Ferroptosis	39	0.496816	1.95092	0.000208588	0.0008269	0.000452201	3748	tags=44%, list=15%, signal=37%	81631/5621/3162/112483/1536/30061/64116/6520/1356/55240/2495/51703/6303/2180/9474/2729/94033
hsa04974	Protein digestion and absorption	95	0.368285	1.74712	0.000235745	0.000923565	0.000505063	5404	tags=37%, list=21%, signal=29%	4311/1308/54407/5547/4225/9056/7373/1292/6520/483/1360/3769/3783/1307/1296/6505/6564/340024/6546/59272/1361/23428/1281/1285/1289/6519/1305/1310/1286/1359/2006/1803/1293/1300/91522
hsa00053	Ascorbate and aldarate metabolism	29	0.541696	1.98993	0.000326401	0.00126386	0.000691155	3698	tags=45%, list=15%, signal=38%	54658/54657/219/54577/7366/9104/217/54575/223/7365/224/54659/54600
hsa05134	Legionellosis	55	0.444146	1.86361	0.000333396	0.0012761	0.000697852	4380	tags=42%, list=17%, signal=35%	3569/3553/7099/4615/718/2920/834/7097/5970/1195/929/841/3593/56681/1378/2919/3689/4790/7124/3684/1937/3306/2921
hsa04350	TGF-beta signaling pathway	94	0.368884	1.74998	0.000358753	0.00135755	0.000742396	4419	tags=35%, list=18%, signal=29%	3397/1634/5516/4609/3398/7057/3399/654/2014/92/4091/653/269/57817/4092/7043/2615/659/7048/2331/4093/3400/4756/9978/285704/4681/7124/64388/1874/90/2200/3458/6093
hsa03018	RNA degradation	70	-0.440525	-1.77066	0.000410207	0.00153093	0.000837207	5666	tags=39%, list=23%, signal=30%	3329/11340/84186/5211/10140/196513/10438/23019/10766/167227/2023/131870/3313/23644/9924/4848/57819/23404/57472/4850/25904/1656/25804/6499/115752/80153/4849
hsa04066	HIF-1 signaling pathway	103	0.348452	1.67913	0.000413764	0.00153093	0.000837207	4330	tags=33%, list=17%, signal=27%	3569/3091/7010/5054/7099/5604/6194/3162/5336/5209/1906/1536/596/3459/4846/6774/253314/2872/3945/5970/1027/3939/4055/7076/3101/9978/4790/3098/5293/284/3480/3479/2056/3458
hsa04978	Mineral absorption	58	0.428917	1.82612	0.000545366	0.00199568	0.00109136	3778	tags=38%, list=15%, signal=32%	4499/4502/4493/4494/4501/4489/79901/3162/6523/7779/30061/4495/9843/483/4496/2495/340024/6546/55503/7421/115019/3163
hsa00640	Propanoate metabolism	31	0.530406	1.97221	0.000578088	0.00209243	0.00114427	4676	tags=58%, list=19%, signal=47%	23417/8801/55862/84693/8803/3945/5095/594/1738/3939/1962/8310/593/18/4329/51/26275/79611
hsa05132	Salmonella infection	229	0.279061	1.5062	0.00065493	0.00234507	0.00128243	4499	tags=31%, list=18%, signal=26%	2353/3725/388/3569/837/4609/3553/114548/7099/4615/5604/7132/84617/5788/596/834/83547/197259/5609/5294/23643/8717/7189/391/6416/10096/23191/9367/7097/5970/55860/79026/929/5602/5606/841/79443/329/5289/79659/29109/5216/3800/9648/10095/998/338382/10671/5868/4790/7124/26999/10006/2316/10092/8797/5293/10398/5286/64746/83657/6237/140735/3071/71/3839/1781/5599/8772/11035/89953
hsa00010	Glycolysis / Gluconeogenesis	64	0.405208	1.76757	0.000665683	0.00235822	0.00128962	3672	tags=34%, list=15%, signal=29%	5223/441531/125/128/126/219/127/5236/55276/3945/130/1738/3939/217/124/223/2203/3101/3098/5105/224/9562
hsa05160	Hepatitis C	152	0.310085	1.59339	0.000768548	0.00269396	0.00147323	4976	tags=34%, list=20%, signal=28%	9021/975/5516/3716/3665/4609/3949/4939/5604/5010/4938/7132/9071/595/10379/355/55844/6041/7098/4599/6774/3845/8717/91543/7189/5970/9451/5520/841/4600/1021/5925/3455/4790/7124/3434/6772/5293/3456/49861/1366/3458/9073/8772/23562/8837/8503/7532/148022/9075/3627/3551
hsa04114	Oocyte meiosis	114	-0.37584	-1.63771	0.00104795	0.00363507	0.00198789	3046	tags=29%, list=12%, signal=26%	51434/23291/89869/5518/5568/6300/27127/8243/9088/115/995/5515/51433/4085/5528/699/51529/9232/26271/9700/5525/891/991/898/29945/29882/9133/286151/9134/808/8697/6790/112
hsa00340	Histidine metabolism	19	0.614492	2.03277	0.00123279	0.00423215	0.0023144	5849	tags=68%, list=23%, signal=53%	219/84735/217/223/4129/224/3176/443/55748/10841/144193/218/3034
hsa00430	Taurine and hypotaurine metabolism	16	0.644569	1.99414	0.00150432	0.00505999	0.00276712	1885	tags=44%, list=7%, signal=40%	2687/2327/2328/2329/84890/2330/51380
hsa04976	Bile secretion	85	0.353837	1.6453	0.00149698	0.00505999	0.00276712	4680	tags=35%, list=19%, signal=29%	3949/54658/54657/1576/3781/6580/6523/483/28234/358/366/760/5567/1080/54577/6344/7366/6554/10599/54575/8671/107/6548/7365/54659/54600/108/109/7367/10998
hsa05131	Shigellosis	199	0.272127	1.45689	0.00191629	0.00638126	0.00348967	3734	tags=27%, list=15%, signal=23%	1398/81631/3725/837/5588/3553/3059/10892/114548/7099/2308/4615/960/6352/831/5336/7132/718/3554/824/596/834/7323/8915/7314/8717/7189/10096/5970/929/5602/5289/5216/3611/10095/998/3101/9978/5330/10670/55062/6233/4790/10241/3098/7124/9474/4793/10092/472/7414/5293/10398
hsa00970	Aminoacyl-tRNA biosynthesis	24	-0.569507	-1.80467	0.00222133	0.0073238	0.00400511	7019	tags=54%, list=28%, signal=39%	283459/80222/10667/57038/2193/54938/10056/55278/23395/124454/55157/57176/23438
hsa05016	Huntington disease	256	-0.296509	-1.43961	0.00250899	0.00819113	0.00447942	6807	tags=38%, list=27%, signal=28%	5701/4708/83447/4707/56901/257202/7419/5706/5717/1337/55626/84790/4728/83544/9377/1351/143471/125965/5702/7417/170712/581/2033/5689/292/4729/4710/84516/1350/160/4899/7384/148327/6667/3831/1345/347688/3065/1173/81027/9001/196385/54205/5441/4713/7388/163/4696/4711/203068/5695/5331/7416/5714/5435/836/6804/5710/4714/1347/10376/5715/6908/5687/5693/5707/5708/54539/1175/10120/84701/8408/5433/5718/5439/2…
hsa04510	Focal adhesion	191	0.285922	1.52913	0.00254669	0.00823347	0.00450258	5542	tags=34%, list=22%, signal=26%	1398/3725/5156/3908/7057/56034/2534/10319/2012/5604/55742/3676/3680/824/595/596/5880/1292/5649/80310/894/2013/5602/896/25759/329/3695/53358/4638/3611/64098/3675/3694/998/3082/2316/7058/7414/5728/858/5293/10398/5906/1285/71/3480/3479/4660/1286/5599/857/6093/7424/3913/8503/5500/3918/284217/3371/3685/1293/5159/10000/387
hsa05207	Chemical carcinogenesis - receptor activation	187	0.275605	1.47267	0.00277225	0.00887652	0.00485424	4776	tags=32%, list=19%, signal=26%	9314/2353/3725/4609/1544/5604/8600/54658/3717/54657/2099/1576/1545/595/2949/596/2247/6774/3845/9446/5970/774/5567/2947/54577/1555/55584/896/7366/2250/10728/5925/27330/54575/1543/6196/107/9586/9970/4790/7365/54659/154/2053/7421/54600/5293/409/4259/108/2773/2771/3839/4257/109/7367/775/8503/6776
hsa00620	Pyruvate metabolism	46	0.426706	1.73171	0.00286113	0.00907387	0.00496216	3360	tags=41%, list=13%, signal=36%	125/128/126/219/127/9380/3945/98/130/1738/197257/3939/217/124/5091/38/223/5105/224
hsa04914	Progesterone-mediated oocyte maturation	86	-0.391436	-1.62722	0.00315583	0.00991407	0.00542164	3046	tags=30%, list=12%, signal=27%	51434/3326/5568/6300/5601/9088/115/993/51343/994/995/51433/4085/699/51529/673/891/890/29945/5296/29882/9133/5894/8697/6790/112
hsa03050	Proteasome	44	-0.461108	-1.68081	0.00328632	0.0102275	0.00559305	6807	tags=52%, list=27%, signal=38%	5701/5706/5717/143471/5702/5689/5720/23198/5695/5714/5710/5715/5687/5693/10197/5707/5708/5718/5688/5692/5709/5700/5691
hsa04623	Cytosolic DNA-sensing pathway	68	0.364175	1.59069	0.00336409	0.0103726	0.00567239	2127	tags=24%, list=8%, signal=22%	3569/3665/81030/3553/114548/6352/9560/90865/388372/834/197259/1777/5970/661/841/9447
hsa04622	RIG-I-like receptor signaling pathway	65	0.349815	1.5345	0.00364636	0.0111398	0.00609194	7024	tags=54%, list=28%, signal=39%	3665/64135/54941/1540/10010/8717/7189/5970/5602/841/3593/1654/4790/7124/9474/4793/3456/5599/8772/64343/79132/4214/3627/3551/843/56832/55593/1432/3451/23586/9636/3442/3445/79671/3467
hsa04810	Regulation of actin cytoskeleton	213	0.256094	1.37042	0.00382002	0.0115642	0.00632405	5742	tags=32%, list=23%, signal=25%	1398/730/5156/10672/6387/56034/8826/7852/1902/5604/55970/3676/735/3680/2934/729/5880/2247/3845/22800/10096/23191/89846/2149/80310/3695/2250/4638/5216/3675/3681/6548/10095/3694/998/3689/57121/733/26999/10092/3684/9459/7414/5293/10398/54961/6237/3071/71/4660/8074/6093/4629/3682/8503/4342/5500/26281/3685/5159/1073/4478/10000/387/2246/2249/8515/9138
hsa04664	Fc epsilon RI signaling pathway	66	0.359842	1.57803	0.00386273	0.0115882	0.00633715	2077	tags=29%, list=8%, signal=26%	695/2534/5604/240/5336/241/4067/2205/3635/5880/5609/3845/3937/2207/6416/3596/3565/5602/5606
hsa04714	Thermogenesis	173	-0.318369	-1.47495	0.00409137	0.012151	0.00664491	6721	tags=40%, list=27%, signal=29%	4708/4707/56901/1337/4728/9377/1351/125965/5562/170712/6009/4893/4729/91942/5600/1353/2641/4710/1350/2182/123096/7384/285521/7249/5566/148327/152831/1345/5563/53632/4713/7388/6597/6599/4696/4711/10063/86/6199/4714/1347/2778/6605/54539/3265/1375/5568/5565/6300/84701/7350/115/4694/6601/90639/64764/4698/8289/656/6198/4702/2885/9658/6598/7248/6602/5564/112/84335
hsa04015	Rap1 signaling pathway	201	0.260944	1.40262	0.0041233	0.012151	0.00664491	6109	tags=36%, list=24%, signal=27%	2357/1398/5156/3397/1969/7057/56034/2775/7010/1902/83593/1436/5604/4804/8631/10235/5880/2247/3845/3937/23683/2149/80310/5606/2250/5216/11069/9732/107/2904/998/3689/57121/801/5330/3082/5900/3684/5293/5906/6494/284/108/6237/71/2773/3480/3479/2771/8074/4803/1813/7424/109/91860/8503/5899/26281/51806/5159/10000/387/2246/2249/1432/805/26037/7409/113/5587/2252/2776
hsa05170	Human immunodeficiency virus 1 infection	197	0.269633	1.44976	0.00426787	0.0124667	0.00681755	4985	tags=33%, list=20%, signal=27%	1398/2353/3725/2775/567/7852/3133/7133/7099/4615/5604/55970/4772/5533/5336/7132/3134/3106/915/355/920/596/5880/5530/5609/3845/8717/919/7189/54331/7097/5970/917/916/3107/5602/5606/841/85363/8905/684/2185/9978/801/4790/2791/7124/472/5293/3456/5532/8065/2773/2771/5599/8772/2790/60489/7465/2787/91860/8503/8451/3551/200315
hsa04014	Ras signaling pathway	220	0.260956	1.407	0.00440962	0.0127687	0.00698273	5734	tags=35%, list=23%, signal=27%	5156/1969/56034/7010/5322/4908/23179/5966/83593/1436/5604/55970/4804/5336/10125/2113/7039/10235/5880/2247/3845/22800/54331/5970/5567/8036/80310/5602/8315/2322/283455/25759/7535/2250/27/5320/53358/2114/2904/81579/998/5922/801/4915/5868/4790/2791/3082/5900/5293/5906/284/6237/3480/3479/8074/4803/5599/2790/7424/2787/91860/8503/5899/3551/26281/51806/5159/2793/10000/3363/387/9610/2246/2249/356/94235
hsa03010	Ribosome	129	0.294544	1.47827	0.00495537	0.0142253	0.00777931	3863	tags=29%, list=15%, signal=24%	6189/6194/6129/65008/6154/51023/6137/9349/29088/6224/64983/6130/6160/6234/6207/6232/6125/6168/9045/25873/64981/54948/9801/6144/6133/23521/6205/6136/6157/6122/6146/6210/6233/6235/140032/4736/6187
hsa00983	Drug metabolism - other enzymes	76	0.33421	1.51732	0.00541778	0.0154198	0.00843253	3844	tags=34%, list=15%, signal=29%	10/1571/54658/54657/51727/1576/2949/2950/9446/151531/1806/2947/54577/50484/7366/1549/54575/1066/1548/978/7365/9/54659/7172/54600/4259
hsa03450	Non-homologous end-joining	12	-0.662116	-1.74801	0.0057458	0.0162081	0.0088636	3855	tags=58%, list=15%, signal=49%	27343/2547/5591/27434/10111/64421/2237
hsa00240	Pyrimidine metabolism	50	-0.429705	-1.61349	0.00579208	0.0162081	0.0088636	3476	tags=34%, list=14%, signal=29%	7371/7083/4833/318/4830/7298/4832/83549/1854/6241/56474/56953/955/124583/6240/54963/790
hsa00040	Pentose and glucuronate interconversions	31	0.452092	1.68101	0.00833541	0.0229715	0.0125622	4878	tags=42%, list=19%, signal=34%	54658/54657/54577/7360/7366/54575/6652/7365/54659/54600/51084/7367/51181
hsa01200	Carbon metabolism	108	0.2872	1.39008	0.00834699	0.0229715	0.0125622	5547	tags=32%, list=22%, signal=25%	6392/8801/5223/51179/2098/441531/128/84693/8803/847/5095/1738/9104/2653/5091/54363/38/8310/2203/3101/4329/6470/3098/51/6390/26275/6389/5313/2875/55753/5634/29968/4199/2026/35
hsa05161	Hepatitis B	156	0.272479	1.41153	0.00843951	0.0230357	0.0125974	2401	tags=21%, list=10%, signal=19%	2353/1959/3725/3569/3716/3665/4609/64135/7099/4615/5604/4772/3717/355/1960/6775/596/7043/5609/7098/6774/3845/7048/7189/6416/7097/5970/5602/5606/841/6554/5925
hsa03060	Protein export	21	-0.541804	-1.66236	0.00881802	0.0238732	0.0130553	3873	tags=43%, list=15%, signal=36%	23480/5018/55176/3309/6727/6728/6730/58477/29927
hsa05205	Proteoglycans in cancer	196	0.256839	1.37903	0.00921328	0.0247421	0.0135305	4474	tags=27%, list=18%, signal=22%	1634/4609/3091/7057/8826/7472/3059/7099/5604/960/6194/288/2099/5329/5336/4060/7078/287/1839/595/355/967/2247/6774/3845/22800/7097/5567/54361/3593/10855/8325/8321/3316/7484/6548/998/3082/7124/2316/7479/858/5293/6237/71/3480/3479/4660/857/7482/7475/6093/4313
hsa00630	Glyoxylate and dicarboxylate metabolism	27	0.469709	1.69831	0.00958497	0.0253317	0.013853	3243	tags=37%, list=13%, signal=32%	51179/84693/9380/847/5095/1738/2653/54363/38/6470
hsa03420	Nucleotide excision repair	43	-0.439322	-1.59529	0.00957691	0.0253317	0.013853	3627	tags=35%, list=14%, signal=30%	54107/8450/10714/1642/5426/29935/5983/5427/5985/5984/3978/2071/5981/2968/5424
hsa04512	ECM-receptor interaction	85	0.319467	1.48548	0.00986333	0.0258621	0.014143	5759	tags=33%, list=23%, signal=25%	3908/7057/10319/960/3676/3680/1292/5649/3695/961/341640/3675/3694/255743/7058/2811/1285/1286/3913/3918/2814/284217/3371/3685/1293/158326/8515/3912
hsa04210	Apoptosis	130	0.278845	1.39685	0.0107448	0.0279533	0.0152866	4468	tags=29%, list=18%, signal=24%	4170/2353/3725/1519/4616/5604/7132/1520/824/355/3002/596/839/3845/8717/5970/9451/5551/5783/5602/841/1508/329/5366/1075/1513/4790/7124/472/8797/5293/8722/71/4803/5599/8772/1521/8837
hsa00515	Mannose type O-glycan biosynthesis	16	-0.582311	-1.67083	0.0109536	0.0282756	0.0154628	6371	tags=56%, list=25%, signal=42%	8703/79147/8704/55624/6487/148789/2218/29954/10585
hsa03320	PPAR signaling pathway	70	0.335109	1.48023	0.0118826	0.0304377	0.0166453	5025	tags=39%, list=20%, signal=31%	10999/33/5360/2712/6342/51703/1376/1962/3611/376497/1593/8310/79966/364/2180/1622/5105/10580/2170/1582/51/30/2710/2167/10998/34/28965
hsa00563	Glycosylphosphatidylinositol (GPI)-anchor biosynthesis	26	-0.504417	-1.63969	0.0124674	0.0316919	0.0173311	4486	tags=46%, list=18%, signal=38%	23556/9091/51604/5279/84720/80055/54965/65258/8818/80235/54872/128869
hsa04917	Prolactin signaling pathway	70	0.33092	1.46173	0.0129719	0.0327245	0.0178958	4776	tags=37%, list=19%, signal=30%	9021/2353/8835/3659/5604/8600/3717/2099/595/6774/3845/8651/5970/894/5602/25759/53358/9306/4790/6772/5293/1154/5599/2309/8503/6776
hsa00260	Glycine, serine and threonine metabolism	39	0.388267	1.52467	0.01375	0.0344268	0.0188267	6528	tags=51%, list=26%, signal=38%	5223/441531/9380/211/27232/1738/2653/29958/2628/1491/4129/6470/51268/64902/8639/29968/1757/10993/63826/212
hsa00514	Other types of O-glycan biosynthesis	33	-0.467227	-1.60095	0.0140709	0.0349672	0.0191222	4445	tags=36%, list=18%, signal=30%	8703/8704/23275/8473/2591/63917/5986/6487/23509/8985/29954/10585
hsa04966	Collecting duct acid secretion	27	-0.483968	-1.60544	0.0147717	0.0364369	0.019926	6620	tags=48%, list=26%, signal=36%	23545/10312/527/245972/1188/127124/10723/535/50617/528/9296/496/529
hsa05014	Amyotrophic lateral sclerosis	302	-0.267468	-1.30988	0.0150147	0.0367639	0.0201048	6721	tags=36%, list=27%, signal=27%	4708/4707/23279/56901/257202/5706/80208/5717/1337/572/55626/84790/4728/83544/9377/1351/143471/125965/5702/55255/170712/23435/5535/581/3178/2733/2906/5689/4729/5600/4710/84516/1350/23064/1616/7384/3831/1345/347688/81027/9001/196385/54205/4713/7388/4696/4711/5534/203068/5695/7416/5714/9217/836/5710/4714/1347/10376/5715/5687/5693/5707/5708/54539/4686/2521/10120/6300/10762/84701/5861/8408/5718/3309/1…
hsa00591	Linoleic acid metabolism	26	0.453188	1.6263	0.0152168	0.0369867	0.0202267	3431	tags=35%, list=14%, signal=30%	1544/5322/1571/1576/1559/5320/81579/1558/1573
hsa04080	Neuroactive ligand-receptor interaction	338	0.215979	1.22025	0.0160249	0.0386687	0.0211465	6403	tags=30%, list=25%, signal=23%	2357/2358/5732/5734/728/133/7433/1902/4889/5443/27334/3357/718/2359/2797/719/706/1906/1910/53829/148/3001/2568/5173/147/6915/151/5023/5031/140/185/10800/2149/339403/5724/55584/6344/7068/3361/10888/2562/5020/5368/387129/116/5741/2904/796/9934/286530/2915/2890/2558/885/7201/154/1394/5731/1142/2908/150/10424/2690/6863/1813/5729/2740/2892/6869/153/9287/10911/3362/6753/122876/4142/2550/2897/165829/336…
hsa01521	EGFR tyrosine kinase inhibitor resistance	77	0.314381	1.43451	0.0163367	0.038858	0.02125	4121	tags=32%, list=16%, signal=27%	5156/3569/3716/56034/558/3084/5604/6194/3717/5336/7039/596/2247/6774/3845/253314/80310/25759/53358/2621/3082/5728/5293/3480/3479
hsa01240	Biosynthesis of cofactors	133	0.27139	1.356	0.0162436	0.038858	0.02125	4175	tags=30%, list=17%, signal=25%	9054/1723/79717/5805/54658/54657/51727/27010/8942/6999/2643/219/211/10797/249/54577/10243/7360/1738/27430/210/7366/9104/53354/217/3242/54575/441024/8564/6470/7365/224/2729/54659/129607/50808/54600/1352/4522/27235
hsa00220	Arginine biosynthesis	20	0.485039	1.61393	0.017245	0.0407276	0.0222724	8089	tags=60%, list=32%, signal=41%	4846/95/5009/2875/27165/445/384/383/84706/2747/162417/2746
hsa04390	Hippo signaling pathway	150	0.258849	1.33009	0.0181195	0.0424914	0.023237	2423	tags=19%, list=10%, signal=18%	3397/5516/4609/3398/7472/5054/654/653/595/55844/4092/7043/60485/659/85409/7048/25937/126374/2736/5520/894/54361/1740/896/329/8325/10413/8321/26524
hsa03008	Ribosome biogenesis in eukaryotes	62	-0.382709	-1.49899	0.0195284	0.0454752	0.0248687	4550	tags=47%, list=18%, signal=38%	51077/10813/57455/134430/6949/5901/55272/10248/10940/2091/10799/84128/10199/1736/10885/23560/23195/55341/55131/10607/55226/55813/4931/65083/51367/3692/54552/1460/7514
