# Supplementary material for: Exploring key biomarkers of liver fibrosis progression to hepatocellular carcinoma based on immune cell-related genes
Source: Research Square preprint supplement (doi:10.21203/rs.3.rs-6479983/v1), 2025-05-21
Supplement: Supplementary file 11 [file ea769036c190ddbe1bc8f488.xlsx]

## Sheet: mRNA_miRNA_lncRNA
from	to
MCL1	miR-892b
MCL1	miR-101-5p
MCL1	miR-103a-2-5p
MCL1	miR-148a-5p
MCL1	miR-204-5p
MCL1	miR-210-3p
MCL1	miR-211-5p
MCL1	miR-221-5p
MCL1	miR-27b-3p
MCL1	miR-133a-3p
MCL1	miR-127-5p
MCL1	miR-151a-3p
MCL1	miR-148b-5p
MCL1	miR-324-3p
MCL1	miR-133b
MCL1	miR-490-3p
MCL1	miR-497-3p
MCL1	miR-526b-5p
MCL1	miR-522-5p
MCL1	miR-552-3p
MCL1	miR-582-5p
MCL1	miR-454-3p
MCL1	miR-766-3p
MCL1	miR-1288-3p
MCL1	miR-664a-3p
MCL1	miR-101-3p
MCL1	miR-130a-5p
MCL1	miR-575
MCL1	miR-940
MCL1	miR-30b-3p
MCL1	miR-149-5p
MCL1	miR-185-5p
MCL1	miR-130b-5p
MCL1	miR-135b-5p
MCL1	miR-497-5p
MCL1	miR-503-5p
MCL1	miR-622
LYVE1	let-7d-5p
LYVE1	miR-25-3p
LYVE1	miR-129-5p
LYVE1	miR-139-5p
LYVE1	miR-30b-3p
LYVE1	miR-149-5p
LYVE1	miR-106b-5p
LYVE1	miR-324-3p
LYVE1	miR-661
LYVE1	miR-939-5p
LYVE1	miR-1180-3p
LYVE1	miR-1207-5p
LYVE1	miR-1260a
miR-149-5p	TTTY12
miR-25-3p	LINC00293
miR-575	LINC00339
miR-27b-3p	VENTXP1
miR-151a-3p	LINC00222
miR-106b-5p	LINC00293
miR-582-5p	C11orf95
miR-149-5p	TTTY4
miR-149-5p	TTTY4B
miR-149-5p	TTTY4C
miR-130b-5p	LINC00960
miR-210-3p	LINC00301
miR-1180-3p	LINC00486
miR-526b-5p	RASAL2-AS1
miR-133b	LINC00271
miR-133a-3p	LINC00271
miR-497-5p	LINC00461
miR-497-3p	LINC00461
miR-148a-5p	LINC01003
miR-185-5p	SNX29P2
miR-148b-5p	USP27X-AS1
miR-940	TTTY23B
miR-940	TTTY23
miR-622	LINC00272
miR-129-5p	LINC00643
miR-1260a	FAM157B
miR-130b-5p	TTTY6
miR-130b-5p	LINC00643
miR-103a-2-5p	LINC00643
miR-454-3p	PRKCQ-AS1
miR-103a-2-5p	LINC00310
miR-30b-3p	SNX29P2
miR-221-5p	TTTY23B
miR-221-5p	TTTY23
miR-103a-2-5p	LINC00907
miR-1207-5p	LINC00293
miR-503-5p	MIR4435-1HG
miR-503-5p	LINC00152
miR-582-5p	LINC00207
miR-211-5p	LINC00966
miR-1288-3p	TTTY6
miR-148b-5p	LINC00623
miR-204-5p	LINC00966
miR-101-3p	LINC00643
miR-622	TTTY3
miR-552-3p	LINC01021
miR-130b-5p	CRYM-AS1
miR-221-5p	MIR155HG
miR-211-5p	FAM138E
miR-204-5p	FAM138E
miR-1207-5p	FAM41AY1
miR-1207-5p	FAM41AY2
miR-103a-2-5p	MIR155HG
miR-130a-5p	TTTY17A
miR-130a-5p	TTTY17B
miR-130a-5p	TTTY17C
miR-135b-5p	LINC00643
miR-622	LINC00347
miR-575	LINC00960
miR-552-3p	LINC00326
miR-211-5p	FAM138B
miR-204-5p	FAM138B
miR-661	CECR7
miR-103a-2-5p	LINC01060
miR-940	TTTY4
miR-940	TTTY4B
miR-940	TTTY4C
miR-552-3p	LINC00473
miR-30b-3p	FAM157B
miR-130a-5p	TTTY4
miR-130a-5p	TTTY4B
miR-130a-5p	TTTY4C
miR-130a-5p	TTTY12
miR-454-3p	TTTY7
miR-664a-3p	LINC00326
miR-25-3p	JPX
miR-324-3p	LINC00478
miR-892b	TTTY12
miR-664a-3p	TTTY12
let-7d-5p	TTTY23
let-7d-5p	TTTY23B
miR-27b-3p	LINC00486
miR-130a-5p	LINC00936
miR-106b-5p	TPTEP1
miR-526b-5p	TTTY17A
miR-526b-5p	TTTY17B
miR-526b-5p	TTTY17C
miR-148b-5p	LINC00643
miR-497-3p	LINC00115
miR-101-3p	LINC00936
miR-454-3p	TTTY7B
miR-127-5p	LINC00544
miR-211-5p	FAM138A
miR-211-5p	FAM138F
miR-526b-5p	PCGEM1
miR-204-5p	FAM138A
miR-204-5p	FAM138F
miR-1207-5p	TTTY23B
miR-1207-5p	TTTY23
miR-582-5p	TRAM2-AS1
miR-661	SNX29P2
miR-526b-5p	TTTY4
miR-526b-5p	TTTY4B
miR-526b-5p	TTTY4C
miR-490-3p	MIR155HG
miR-454-3p	LINC00339
miR-101-5p	LINC00642
miR-940	SNX29P2
miR-324-3p	SNX29P2
miR-129-5p	TPTEP1
miR-497-3p	MIR155HG
miR-130b-5p	HCCAT5
miR-766-3p	LINC00461
miR-151a-3p	SNX29P2
miR-552-3p	TPTEP1
miR-939-5p	LINC00623
miR-130a-5p	TTTY23B
miR-130a-5p	TTTY23
miR-664a-3p	LINC00052
miR-454-3p	LINC00052
miR-1288-3p	TTTY23B
miR-1288-3p	TTTY23
miR-454-3p	LINC00856
miR-522-5p	LINC00326
miR-210-3p	TTTY12
miR-552-3p	TTTY23B
miR-552-3p	TTTY23
miR-149-5p	SNX29P2
miR-101-5p	LINC00240
miR-148b-5p	LINC00960
miR-526b-5p	LINC00883
miR-664a-3p	LINC00643
miR-148b-5p	SNX29P2
miR-139-5p	LINC00052
miR-148a-5p	LINC00960
miR-130b-5p	SNX29P2
miR-552-3p	TTTY7
miR-148b-5p	FAM157B
miR-552-3p	TTTY7B
miR-1207-5p	SNX29P2
miR-27b-3p	TTTY4
miR-27b-3p	TTTY4B
miR-27b-3p	TTTY4C
miR-185-5p	LINC00028
miR-148a-5p	SNX29P2
miR-940	TTTY6
miR-30b-3p	TTTY3
